# Supplementary material for: Whole transcriptomic analysis revealed the effects of different dietary protein levels on the growth and development of Jersey-yak
Source: Research Square preprint supplement (doi:10.21203/rs.3.rs-7466956/v1), 2025-09-30
Supplement: Supplementary file 1 [file 09a48003b01bdbfa0bf9d1f1.xlsx]

## Sheet: cis lncRNAs
LncRNA cis-prediction of target gene information
lncRNAGeneID	mRNAGeneID	lncRNATranscriptID	Distance	lncRNAGenePos	mRNAGenePos	mRNAGeneName	mRNAGeneGO	mRNAGeneKEGG	mRNAGeneDescription	mRNAGeneSwissprot	mRNAGeneEggNOG	mRNAGeneEggNOG_Category	mRNAGeneBP	mRNAGeneCC	mRNAGeneMF	mRNAGenePathway
MSTRG.1000	ENSBGRG00000000037	MSTRG.1000.1	34470	1[-]17960762-17963609	1[+]17998079-18071143	CXADR	GO:0005178;GO:0005654;GO:0005737;GO:0005886;GO:0005911;GO:0005912;GO:0005923;GO:0007157;GO:0008013;GO:0010669;GO:0016323;GO:0016327;GO:0030054;GO:0030165;GO:0030593;GO:0031532;GO:0032991;GO:0045121;GO:0050839;GO:0070633;	K06788	CXADR Ig-like cell adhesion molecule [Source:HGNC Symbol;Acc:HGNC:2559]	sp|Q8WMV3|CXAR_BOVIN Coxsackievirus and adenovirus receptor homolog OS=Bos taurus OX=9913 GN=CXADR PE=2 SV=1	veNOG08870	T	GO:0007157//heterophilic cell-cell adhesion via plasma membrane cell adhesion molecules;GO:0010669//epithelial structure maintenance;GO:0030593//neutrophil chemotaxis;GO:0031532//actin cytoskeleton reorganization;GO:0070633//transepithelial transport;	GO:0005654//nucleoplasm;GO:0005737//cytoplasm;GO:0005886//plasma membrane;GO:0005911//cell-cell junction;GO:0005912//adherens junction;GO:0005923//bicellular tight junction;GO:0016323//basolateral plasma membrane;GO:0016327//apicolateral plasma membrane;GO:0030054//cell junction;GO:0032991//protein-containing complex;GO:0045121//membrane raft;	GO:0005178//integrin binding;GO:0008013//beta-catenin binding;GO:0030165//PDZ domain binding;GO:0050839//cell adhesion molecule binding;	ko05416(Viral myocarditis)
MSTRG.100023	ENSBGRG00000015594	MSTRG.100023.1	0	19[-]35287936-35289353	19[-]35272465-35385366	COX10	GO:0000266;GO:0004311;GO:0005730;GO:0005739;GO:0005739;GO:0005829;GO:0006783;GO:0006784;GO:0006784;GO:0007005;GO:0008495;GO:0008535;GO:0009060;GO:0016021;GO:0016765;GO:0017004;GO:0031966;GO:0070069;GO:0006783;GO:0008495;GO:0016021;GO:0016765;GO:0031966;	K02257	cytochrome c oxidase assembly factor heme A:farnesyltransferase COX10 [Source:HGNC Symbol;Acc:HGNC:2260]	sp|Q5R460|COX10_PONAB Protoheme IX farnesyltransferase, mitochondrial OS=Pongo abelii OX=9601 GN=COX10 PE=2 SV=1	veNOG09384	H	GO:0000266//mitochondrial fission;GO:0006783//heme biosynthetic process;GO:0006784//heme A biosynthetic process;GO:0006784//heme A biosynthetic process;GO:0007005//mitochondrion organization;GO:0008535//respiratory chain complex IV assembly;GO:0009060//aerobic respiration;GO:0017004//cytochrome complex assembly;GO:0006783//heme biosynthetic process;	GO:0005730//nucleolus;GO:0005739//mitochondrion;GO:0005739//mitochondrion;GO:0005829//cytosol;GO:0016021//integral component of membrane;GO:0031966//mitochondrial membrane;GO:0070069//cytochrome complex;GO:0016021//integral component of membrane;GO:0031966//mitochondrial membrane;	GO:0004311//farnesyltranstransferase activity;GO:0008495//protoheme IX farnesyltransferase activity;GO:0016765//transferase activity, transferring alkyl or aryl (other than methyl) groups;GO:0008495//protoheme IX farnesyltransferase activity;GO:0016765//transferase activity, transferring alkyl or aryl (other than methyl) groups;	ko04714(Thermogenesis);ko00860(Porphyrin metabolism);ko00190(Oxidative phosphorylation)
MSTRG.100023	ENSBGRG00000015794	MSTRG.100023.1	26867	19[-]35287936-35289353	19[+]35316220-35317314	-	-	-	-	sp|Q03278|PO21_NASVI Retrovirus-related Pol polyprotein from type-1 retrotransposable element R2 (Fragment) OS=Nasonia vitripennis OX=7425 PE=4 SV=2	euNOG24248;opiNOG50433;NOG145335;opiNOG04272	SR	-	-	-	-
MSTRG.100023	ENSBGRG00000015539	MSTRG.100023.1	44659	19[-]35287936-35289353	19[-]35200217-35243277	HS3ST3B1	GO:0001658;GO:0005887;GO:0006024;GO:0006477;GO:0008146;GO:0008467;GO:0008467;	K07809	heparan sulfate-glucosamine 3-sulfotransferase 3B1 [Source:HGNC Symbol;Acc:HGNC:5198]	sp|Q9QZS6|HS3SB_MOUSE Heparan sulfate glucosamine 3-O-sulfotransferase 3B1 OS=Mus musculus OX=10090 GN=Hs3st3b1 PE=2 SV=2	veNOG05636	O	GO:0001658//branching involved in ureteric bud morphogenesis;GO:0006024//glycosaminoglycan biosynthetic process;GO:0006477//protein sulfation;	GO:0005887//integral component of plasma membrane;	GO:0008146//sulfotransferase activity;GO:0008467//[heparan sulfate]-glucosamine 3-sulfotransferase 1 activity;GO:0008467//[heparan sulfate]-glucosamine 3-sulfotransferase 1 activity;	ko00534(Glycosaminoglycan biosynthesis - heparan sulfate / heparin)
MSTRG.100024	ENSBGRG00000015594	MSTRG.100024.1	0	19[-]35288297-35289775	19[-]35272465-35385366	COX10	GO:0000266;GO:0004311;GO:0005730;GO:0005739;GO:0005739;GO:0005829;GO:0006783;GO:0006784;GO:0006784;GO:0007005;GO:0008495;GO:0008535;GO:0009060;GO:0016021;GO:0016765;GO:0017004;GO:0031966;GO:0070069;GO:0006783;GO:0008495;GO:0016021;GO:0016765;GO:0031966;	K02257	cytochrome c oxidase assembly factor heme A:farnesyltransferase COX10 [Source:HGNC Symbol;Acc:HGNC:2260]	sp|Q5R460|COX10_PONAB Protoheme IX farnesyltransferase, mitochondrial OS=Pongo abelii OX=9601 GN=COX10 PE=2 SV=1	veNOG09384	H	GO:0000266//mitochondrial fission;GO:0006783//heme biosynthetic process;GO:0006784//heme A biosynthetic process;GO:0006784//heme A biosynthetic process;GO:0007005//mitochondrion organization;GO:0008535//respiratory chain complex IV assembly;GO:0009060//aerobic respiration;GO:0017004//cytochrome complex assembly;GO:0006783//heme biosynthetic process;	GO:0005730//nucleolus;GO:0005739//mitochondrion;GO:0005739//mitochondrion;GO:0005829//cytosol;GO:0016021//integral component of membrane;GO:0031966//mitochondrial membrane;GO:0070069//cytochrome complex;GO:0016021//integral component of membrane;GO:0031966//mitochondrial membrane;	GO:0004311//farnesyltranstransferase activity;GO:0008495//protoheme IX farnesyltransferase activity;GO:0016765//transferase activity, transferring alkyl or aryl (other than methyl) groups;GO:0008495//protoheme IX farnesyltransferase activity;GO:0016765//transferase activity, transferring alkyl or aryl (other than methyl) groups;	ko04714(Thermogenesis);ko00860(Porphyrin metabolism);ko00190(Oxidative phosphorylation)
MSTRG.100024	ENSBGRG00000015794	MSTRG.100024.1	26445	19[-]35288297-35289775	19[+]35316220-35317314	-	-	-	-	sp|Q03278|PO21_NASVI Retrovirus-related Pol polyprotein from type-1 retrotransposable element R2 (Fragment) OS=Nasonia vitripennis OX=7425 PE=4 SV=2	euNOG24248;opiNOG50433;NOG145335;opiNOG04272	SR	-	-	-	-
MSTRG.100024	ENSBGRG00000015539	MSTRG.100024.1	45020	19[-]35288297-35289775	19[-]35200217-35243277	HS3ST3B1	GO:0001658;GO:0005887;GO:0006024;GO:0006477;GO:0008146;GO:0008467;GO:0008467;	K07809	heparan sulfate-glucosamine 3-sulfotransferase 3B1 [Source:HGNC Symbol;Acc:HGNC:5198]	sp|Q9QZS6|HS3SB_MOUSE Heparan sulfate glucosamine 3-O-sulfotransferase 3B1 OS=Mus musculus OX=10090 GN=Hs3st3b1 PE=2 SV=2	veNOG05636	O	GO:0001658//branching involved in ureteric bud morphogenesis;GO:0006024//glycosaminoglycan biosynthetic process;GO:0006477//protein sulfation;	GO:0005887//integral component of plasma membrane;	GO:0008146//sulfotransferase activity;GO:0008467//[heparan sulfate]-glucosamine 3-sulfotransferase 1 activity;GO:0008467//[heparan sulfate]-glucosamine 3-sulfotransferase 1 activity;	ko00534(Glycosaminoglycan biosynthesis - heparan sulfate / heparin)
MSTRG.100026	ENSBGRG00000015594	MSTRG.100026.1	0	19[-]35318493-35319944	19[-]35272465-35385366	COX10	GO:0000266;GO:0004311;GO:0005730;GO:0005739;GO:0005739;GO:0005829;GO:0006783;GO:0006784;GO:0006784;GO:0007005;GO:0008495;GO:0008535;GO:0009060;GO:0016021;GO:0016765;GO:0017004;GO:0031966;GO:0070069;GO:0006783;GO:0008495;GO:0016021;GO:0016765;GO:0031966;	K02257	cytochrome c oxidase assembly factor heme A:farnesyltransferase COX10 [Source:HGNC Symbol;Acc:HGNC:2260]	sp|Q5R460|COX10_PONAB Protoheme IX farnesyltransferase, mitochondrial OS=Pongo abelii OX=9601 GN=COX10 PE=2 SV=1	veNOG09384	H	GO:0000266//mitochondrial fission;GO:0006783//heme biosynthetic process;GO:0006784//heme A biosynthetic process;GO:0006784//heme A biosynthetic process;GO:0007005//mitochondrion organization;GO:0008535//respiratory chain complex IV assembly;GO:0009060//aerobic respiration;GO:0017004//cytochrome complex assembly;GO:0006783//heme biosynthetic process;	GO:0005730//nucleolus;GO:0005739//mitochondrion;GO:0005739//mitochondrion;GO:0005829//cytosol;GO:0016021//integral component of membrane;GO:0031966//mitochondrial membrane;GO:0070069//cytochrome complex;GO:0016021//integral component of membrane;GO:0031966//mitochondrial membrane;	GO:0004311//farnesyltranstransferase activity;GO:0008495//protoheme IX farnesyltransferase activity;GO:0016765//transferase activity, transferring alkyl or aryl (other than methyl) groups;GO:0008495//protoheme IX farnesyltransferase activity;GO:0016765//transferase activity, transferring alkyl or aryl (other than methyl) groups;	ko04714(Thermogenesis);ko00860(Porphyrin metabolism);ko00190(Oxidative phosphorylation)
MSTRG.100026	ENSBGRG00000015794	MSTRG.100026.1	1179	19[-]35318493-35319944	19[+]35316220-35317314	-	-	-	-	sp|Q03278|PO21_NASVI Retrovirus-related Pol polyprotein from type-1 retrotransposable element R2 (Fragment) OS=Nasonia vitripennis OX=7425 PE=4 SV=2	euNOG24248;opiNOG50433;NOG145335;opiNOG04272	SR	-	-	-	-
MSTRG.100026	ENSBGRG00000015539	MSTRG.100026.1	75216	19[-]35318493-35319944	19[-]35200217-35243277	HS3ST3B1	GO:0001658;GO:0005887;GO:0006024;GO:0006477;GO:0008146;GO:0008467;GO:0008467;	K07809	heparan sulfate-glucosamine 3-sulfotransferase 3B1 [Source:HGNC Symbol;Acc:HGNC:5198]	sp|Q9QZS6|HS3SB_MOUSE Heparan sulfate glucosamine 3-O-sulfotransferase 3B1 OS=Mus musculus OX=10090 GN=Hs3st3b1 PE=2 SV=2	veNOG05636	O	GO:0001658//branching involved in ureteric bud morphogenesis;GO:0006024//glycosaminoglycan biosynthetic process;GO:0006477//protein sulfation;	GO:0005887//integral component of plasma membrane;	GO:0008146//sulfotransferase activity;GO:0008467//[heparan sulfate]-glucosamine 3-sulfotransferase 1 activity;GO:0008467//[heparan sulfate]-glucosamine 3-sulfotransferase 1 activity;	ko00534(Glycosaminoglycan biosynthesis - heparan sulfate / heparin)
MSTRG.100027	ENSBGRG00000015594	MSTRG.100027.1	0	19[-]35348845-35349673	19[-]35272465-35385366	COX10	GO:0000266;GO:0004311;GO:0005730;GO:0005739;GO:0005739;GO:0005829;GO:0006783;GO:0006784;GO:0006784;GO:0007005;GO:0008495;GO:0008535;GO:0009060;GO:0016021;GO:0016765;GO:0017004;GO:0031966;GO:0070069;GO:0006783;GO:0008495;GO:0016021;GO:0016765;GO:0031966;	K02257	cytochrome c oxidase assembly factor heme A:farnesyltransferase COX10 [Source:HGNC Symbol;Acc:HGNC:2260]	sp|Q5R460|COX10_PONAB Protoheme IX farnesyltransferase, mitochondrial OS=Pongo abelii OX=9601 GN=COX10 PE=2 SV=1	veNOG09384	H	GO:0000266//mitochondrial fission;GO:0006783//heme biosynthetic process;GO:0006784//heme A biosynthetic process;GO:0006784//heme A biosynthetic process;GO:0007005//mitochondrion organization;GO:0008535//respiratory chain complex IV assembly;GO:0009060//aerobic respiration;GO:0017004//cytochrome complex assembly;GO:0006783//heme biosynthetic process;	GO:0005730//nucleolus;GO:0005739//mitochondrion;GO:0005739//mitochondrion;GO:0005829//cytosol;GO:0016021//integral component of membrane;GO:0031966//mitochondrial membrane;GO:0070069//cytochrome complex;GO:0016021//integral component of membrane;GO:0031966//mitochondrial membrane;	GO:0004311//farnesyltranstransferase activity;GO:0008495//protoheme IX farnesyltransferase activity;GO:0016765//transferase activity, transferring alkyl or aryl (other than methyl) groups;GO:0008495//protoheme IX farnesyltransferase activity;GO:0016765//transferase activity, transferring alkyl or aryl (other than methyl) groups;	ko04714(Thermogenesis);ko00860(Porphyrin metabolism);ko00190(Oxidative phosphorylation)
MSTRG.100027	ENSBGRG00000015794	MSTRG.100027.1	31531	19[-]35348845-35349673	19[+]35316220-35317314	-	-	-	-	sp|Q03278|PO21_NASVI Retrovirus-related Pol polyprotein from type-1 retrotransposable element R2 (Fragment) OS=Nasonia vitripennis OX=7425 PE=4 SV=2	euNOG24248;opiNOG50433;NOG145335;opiNOG04272	SR	-	-	-	-
MSTRG.100029	ENSBGRG00000015594	MSTRG.100029.1	0	19[-]35364031-35365327	19[-]35272465-35385366	COX10	GO:0000266;GO:0004311;GO:0005730;GO:0005739;GO:0005739;GO:0005829;GO:0006783;GO:0006784;GO:0006784;GO:0007005;GO:0008495;GO:0008535;GO:0009060;GO:0016021;GO:0016765;GO:0017004;GO:0031966;GO:0070069;GO:0006783;GO:0008495;GO:0016021;GO:0016765;GO:0031966;	K02257	cytochrome c oxidase assembly factor heme A:farnesyltransferase COX10 [Source:HGNC Symbol;Acc:HGNC:2260]	sp|Q5R460|COX10_PONAB Protoheme IX farnesyltransferase, mitochondrial OS=Pongo abelii OX=9601 GN=COX10 PE=2 SV=1	veNOG09384	H	GO:0000266//mitochondrial fission;GO:0006783//heme biosynthetic process;GO:0006784//heme A biosynthetic process;GO:0006784//heme A biosynthetic process;GO:0007005//mitochondrion organization;GO:0008535//respiratory chain complex IV assembly;GO:0009060//aerobic respiration;GO:0017004//cytochrome complex assembly;GO:0006783//heme biosynthetic process;	GO:0005730//nucleolus;GO:0005739//mitochondrion;GO:0005739//mitochondrion;GO:0005829//cytosol;GO:0016021//integral component of membrane;GO:0031966//mitochondrial membrane;GO:0070069//cytochrome complex;GO:0016021//integral component of membrane;GO:0031966//mitochondrial membrane;	GO:0004311//farnesyltranstransferase activity;GO:0008495//protoheme IX farnesyltransferase activity;GO:0016765//transferase activity, transferring alkyl or aryl (other than methyl) groups;GO:0008495//protoheme IX farnesyltransferase activity;GO:0016765//transferase activity, transferring alkyl or aryl (other than methyl) groups;	ko04714(Thermogenesis);ko00860(Porphyrin metabolism);ko00190(Oxidative phosphorylation)
MSTRG.100029	ENSBGRG00000015794	MSTRG.100029.1	46717	19[-]35364031-35365327	19[+]35316220-35317314	-	-	-	-	sp|Q03278|PO21_NASVI Retrovirus-related Pol polyprotein from type-1 retrotransposable element R2 (Fragment) OS=Nasonia vitripennis OX=7425 PE=4 SV=2	euNOG24248;opiNOG50433;NOG145335;opiNOG04272	SR	-	-	-	-
MSTRG.10003	ENSBGRG00000014790	MSTRG.10003.1	30314	1[-]118495848-118496356	1[+]118526670-118533787	LXN	GO:0008191;GO:0050965;	K23594	latexin [Source:HGNC Symbol;Acc:HGNC:13347]	sp|P70202|LXN_MOUSE Latexin OS=Mus musculus OX=10090 GN=Lxn PE=1 SV=2	veNOG12211	R	GO:0050965//detection of temperature stimulus involved in sensory perception of pain;	-	GO:0008191//metalloendopeptidase inhibitor activity;	-
MSTRG.10003	ENSBGRG00000014425	MSTRG.10003.1	0	1[-]118495848-118496356	1[+]118460976-118507949	RARRES1	GO:0008285;	K23595	retinoic acid receptor responder 1 [Source:HGNC Symbol;Acc:HGNC:9867]	sp|P49788|TIG1_HUMAN Retinoic acid receptor responder protein 1 OS=Homo sapiens OX=9606 GN=RARRES1 PE=1 SV=2	veNOG09710	T	GO:0008285//negative regulation of cell population proliferation;	-	-	-
MSTRG.10003	ENSBGRG00000014908	MSTRG.10003.1	80699	1[-]118495848-118496356	1[-]118577055-118612617	MLF1	-	K15622	myeloid leukemia factor 1 [Source:HGNC Symbol;Acc:HGNC:7125]	sp|Q32KY3|MLF1_BOVIN Myeloid leukemia factor 1 OS=Bos taurus OX=9913 GN=MLF1 PE=2 SV=1	veNOG16002	K	-	-	-	ko05202(Transcriptional misregulation in cancer)
MSTRG.10003	ENSBGRG00000014469	MSTRG.10003.1	15656	1[-]118495848-118496356	1[-]118512012-118569745	GFM1	GO:0003746;GO:0003746;GO:0003924;GO:0003924;GO:0005525;GO:0006414;GO:0070125;	K02355	G elongation factor mitochondrial 1 [Source:HGNC Symbol;Acc:HGNC:13780]	sp|Q07803|EFGM_RAT Elongation factor G, mitochondrial OS=Rattus norvegicus OX=10116 GN=Gfm1 PE=1 SV=2	veNOG12485	J	GO:0006414//translational elongation;GO:0070125//mitochondrial translational elongation;	-	GO:0003746//translation elongation factor activity;GO:0003746//translation elongation factor activity;GO:0003924//GTPase activity;GO:0003924//GTPase activity;GO:0005525//GTP binding;	-
MSTRG.100030	ENSBGRG00000015594	MSTRG.100030.1	0	19[-]35380372-35380992	19[-]35272465-35385366	COX10	GO:0000266;GO:0004311;GO:0005730;GO:0005739;GO:0005739;GO:0005829;GO:0006783;GO:0006784;GO:0006784;GO:0007005;GO:0008495;GO:0008535;GO:0009060;GO:0016021;GO:0016765;GO:0017004;GO:0031966;GO:0070069;GO:0006783;GO:0008495;GO:0016021;GO:0016765;GO:0031966;	K02257	cytochrome c oxidase assembly factor heme A:farnesyltransferase COX10 [Source:HGNC Symbol;Acc:HGNC:2260]	sp|Q5R460|COX10_PONAB Protoheme IX farnesyltransferase, mitochondrial OS=Pongo abelii OX=9601 GN=COX10 PE=2 SV=1	veNOG09384	H	GO:0000266//mitochondrial fission;GO:0006783//heme biosynthetic process;GO:0006784//heme A biosynthetic process;GO:0006784//heme A biosynthetic process;GO:0007005//mitochondrion organization;GO:0008535//respiratory chain complex IV assembly;GO:0009060//aerobic respiration;GO:0017004//cytochrome complex assembly;GO:0006783//heme biosynthetic process;	GO:0005730//nucleolus;GO:0005739//mitochondrion;GO:0005739//mitochondrion;GO:0005829//cytosol;GO:0016021//integral component of membrane;GO:0031966//mitochondrial membrane;GO:0070069//cytochrome complex;GO:0016021//integral component of membrane;GO:0031966//mitochondrial membrane;	GO:0004311//farnesyltranstransferase activity;GO:0008495//protoheme IX farnesyltransferase activity;GO:0016765//transferase activity, transferring alkyl or aryl (other than methyl) groups;GO:0008495//protoheme IX farnesyltransferase activity;GO:0016765//transferase activity, transferring alkyl or aryl (other than methyl) groups;	ko04714(Thermogenesis);ko00860(Porphyrin metabolism);ko00190(Oxidative phosphorylation)
MSTRG.100030	ENSBGRG00000015794	MSTRG.100030.1	63058	19[-]35380372-35380992	19[+]35316220-35317314	-	-	-	-	sp|Q03278|PO21_NASVI Retrovirus-related Pol polyprotein from type-1 retrotransposable element R2 (Fragment) OS=Nasonia vitripennis OX=7425 PE=4 SV=2	euNOG24248;opiNOG50433;NOG145335;opiNOG04272	SR	-	-	-	-
MSTRG.10004	ENSBGRG00000014790	MSTRG.10004.1	28009	1[-]118497116-118498661	1[+]118526670-118533787	LXN	GO:0008191;GO:0050965;	K23594	latexin [Source:HGNC Symbol;Acc:HGNC:13347]	sp|P70202|LXN_MOUSE Latexin OS=Mus musculus OX=10090 GN=Lxn PE=1 SV=2	veNOG12211	R	GO:0050965//detection of temperature stimulus involved in sensory perception of pain;	-	GO:0008191//metalloendopeptidase inhibitor activity;	-
MSTRG.10004	ENSBGRG00000014425	MSTRG.10004.1	0	1[-]118497116-118498661	1[+]118460976-118507949	RARRES1	GO:0008285;	K23595	retinoic acid receptor responder 1 [Source:HGNC Symbol;Acc:HGNC:9867]	sp|P49788|TIG1_HUMAN Retinoic acid receptor responder protein 1 OS=Homo sapiens OX=9606 GN=RARRES1 PE=1 SV=2	veNOG09710	T	GO:0008285//negative regulation of cell population proliferation;	-	-	-
MSTRG.10004	ENSBGRG00000014908	MSTRG.10004.1	78394	1[-]118497116-118498661	1[-]118577055-118612617	MLF1	-	K15622	myeloid leukemia factor 1 [Source:HGNC Symbol;Acc:HGNC:7125]	sp|Q32KY3|MLF1_BOVIN Myeloid leukemia factor 1 OS=Bos taurus OX=9913 GN=MLF1 PE=2 SV=1	veNOG16002	K	-	-	-	ko05202(Transcriptional misregulation in cancer)
MSTRG.10004	ENSBGRG00000014469	MSTRG.10004.1	13351	1[-]118497116-118498661	1[-]118512012-118569745	GFM1	GO:0003746;GO:0003746;GO:0003924;GO:0003924;GO:0005525;GO:0006414;GO:0070125;	K02355	G elongation factor mitochondrial 1 [Source:HGNC Symbol;Acc:HGNC:13780]	sp|Q07803|EFGM_RAT Elongation factor G, mitochondrial OS=Rattus norvegicus OX=10116 GN=Gfm1 PE=1 SV=2	veNOG12485	J	GO:0006414//translational elongation;GO:0070125//mitochondrial translational elongation;	-	GO:0003746//translation elongation factor activity;GO:0003746//translation elongation factor activity;GO:0003924//GTPase activity;GO:0003924//GTPase activity;GO:0005525//GTP binding;	-
MSTRG.100060	ENSBGRG00000017742	MSTRG.100060.1	94540	19[-]36203355-36205374	19[+]36299914-36300933	-	-	-	-	sp|Q10126|YSM6_CAEEL Putative uncharacterized transposon-derived protein F52C9.6 OS=Caenorhabditis elegans OX=6239 GN=F52C9.6 PE=5 SV=1	opiNOG04272;opiNOG50433;opiNOG54624;euNOG24248	R	-	-	-	-
MSTRG.100060	ENSBGRG00000016986	MSTRG.100060.1	0	19[-]36203355-36205374	19[-]36190538-36326373	ARHGAP44	GO:0005515;GO:0005737;GO:0007165;GO:0005515;GO:0005737;GO:0007165;GO:0005515;GO:0005737;GO:0007165;GO:0005515;GO:0005737;GO:0007165;GO:0005096;GO:0005515;GO:0005543;GO:0005737;GO:0007165;GO:0031256;GO:0031267;GO:0032956;GO:0035021;GO:0043087;GO:0043197;GO:0061001;GO:0098886;GO:0098887;GO:0098978;GO:0099010;GO:0099152;GO:0005515;GO:0005737;GO:0007165;	K21067	Rho GTPase activating protein 44 [Source:HGNC Symbol;Acc:HGNC:29096]	sp|Q5SSM3|RHG44_MOUSE Rho GTPase-activating protein 44 OS=Mus musculus OX=10090 GN=Arhgap44 PE=1 SV=1	veNOG00430	T	GO:0007165//signal transduction;GO:0007165//signal transduction;GO:0007165//signal transduction;GO:0007165//signal transduction;GO:0007165//signal transduction;GO:0032956//regulation of actin cytoskeleton organization;GO:0035021//negative regulation of Rac protein signal transduction;GO:0043087//regulation of GTPase activity;GO:0061001//regulation of dendritic spine morphogenesis;GO:0098886//modi…	GO:0005737//cytoplasm;GO:0005737//cytoplasm;GO:0005737//cytoplasm;GO:0005737//cytoplasm;GO:0005737//cytoplasm;GO:0031256//leading edge membrane;GO:0043197//dendritic spine;GO:0098978//glutamatergic synapse;GO:0005737//cytoplasm;	GO:0005515//protein binding;GO:0005515//protein binding;GO:0005515//protein binding;GO:0005515//protein binding;GO:0005096//GTPase activator activity;GO:0005515//protein binding;GO:0005543//phospholipid binding;GO:0031267//small GTPase binding;GO:0005515//protein binding;	-
MSTRG.100060	ENSBGRG00000015986	MSTRG.100060.1	15141	19[-]36203355-36205374	19[+]36171120-36188214	ELAC2	GO:0005634;GO:0005654;GO:0005739;GO:0008033;GO:0042645;GO:0042645;GO:0072684;GO:0008033;GO:0008033;	K00784	elaC ribonuclease Z 2 [Source:HGNC Symbol;Acc:HGNC:14198]	sp|Q8CGS5|RNZ2_RAT Zinc phosphodiesterase ELAC protein 2 OS=Rattus norvegicus OX=10116 GN=Elac2 PE=1 SV=1	veNOG11856	R	GO:0008033//tRNA processing;GO:0072684//mitochondrial tRNA 3'-trailer cleavage, endonucleolytic;GO:0008033//tRNA processing;GO:0008033//tRNA processing;	GO:0005634//nucleus;GO:0005654//nucleoplasm;GO:0005739//mitochondrion;GO:0042645//mitochondrial nucleoid;GO:0042645//mitochondrial nucleoid;	-	-
MSTRG.100065	ENSBGRG00000017742	MSTRG.100065.1,MSTRG.100065.2	75058	19[-]36222961-36224856	19[+]36299914-36300933	-	-	-	-	sp|Q10126|YSM6_CAEEL Putative uncharacterized transposon-derived protein F52C9.6 OS=Caenorhabditis elegans OX=6239 GN=F52C9.6 PE=5 SV=1	opiNOG04272;opiNOG50433;opiNOG54624;euNOG24248	R	-	-	-	-
MSTRG.100065	ENSBGRG00000016986	MSTRG.100065.1,MSTRG.100065.2	0	19[-]36222961-36224856	19[-]36190538-36326373	ARHGAP44	GO:0005515;GO:0005737;GO:0007165;GO:0005515;GO:0005737;GO:0007165;GO:0005515;GO:0005737;GO:0007165;GO:0005515;GO:0005737;GO:0007165;GO:0005096;GO:0005515;GO:0005543;GO:0005737;GO:0007165;GO:0031256;GO:0031267;GO:0032956;GO:0035021;GO:0043087;GO:0043197;GO:0061001;GO:0098886;GO:0098887;GO:0098978;GO:0099010;GO:0099152;GO:0005515;GO:0005737;GO:0007165;	K21067	Rho GTPase activating protein 44 [Source:HGNC Symbol;Acc:HGNC:29096]	sp|Q5SSM3|RHG44_MOUSE Rho GTPase-activating protein 44 OS=Mus musculus OX=10090 GN=Arhgap44 PE=1 SV=1	veNOG00430	T	GO:0007165//signal transduction;GO:0007165//signal transduction;GO:0007165//signal transduction;GO:0007165//signal transduction;GO:0007165//signal transduction;GO:0032956//regulation of actin cytoskeleton organization;GO:0035021//negative regulation of Rac protein signal transduction;GO:0043087//regulation of GTPase activity;GO:0061001//regulation of dendritic spine morphogenesis;GO:0098886//modi…	GO:0005737//cytoplasm;GO:0005737//cytoplasm;GO:0005737//cytoplasm;GO:0005737//cytoplasm;GO:0005737//cytoplasm;GO:0031256//leading edge membrane;GO:0043197//dendritic spine;GO:0098978//glutamatergic synapse;GO:0005737//cytoplasm;	GO:0005515//protein binding;GO:0005515//protein binding;GO:0005515//protein binding;GO:0005515//protein binding;GO:0005096//GTPase activator activity;GO:0005515//protein binding;GO:0005543//phospholipid binding;GO:0031267//small GTPase binding;GO:0005515//protein binding;	-
MSTRG.100065	ENSBGRG00000015986	MSTRG.100065.1,MSTRG.100065.2	34747	19[-]36222961-36224856	19[+]36171120-36188214	ELAC2	GO:0005634;GO:0005654;GO:0005739;GO:0008033;GO:0042645;GO:0042645;GO:0072684;GO:0008033;GO:0008033;	K00784	elaC ribonuclease Z 2 [Source:HGNC Symbol;Acc:HGNC:14198]	sp|Q8CGS5|RNZ2_RAT Zinc phosphodiesterase ELAC protein 2 OS=Rattus norvegicus OX=10116 GN=Elac2 PE=1 SV=1	veNOG11856	R	GO:0008033//tRNA processing;GO:0072684//mitochondrial tRNA 3'-trailer cleavage, endonucleolytic;GO:0008033//tRNA processing;GO:0008033//tRNA processing;	GO:0005634//nucleus;GO:0005654//nucleoplasm;GO:0005739//mitochondrion;GO:0042645//mitochondrial nucleoid;GO:0042645//mitochondrial nucleoid;	-	-
MSTRG.100085	ENSBGRG00000017742	MSTRG.100085.1	1587	19[-]36302520-36303624	19[+]36299914-36300933	-	-	-	-	sp|Q10126|YSM6_CAEEL Putative uncharacterized transposon-derived protein F52C9.6 OS=Caenorhabditis elegans OX=6239 GN=F52C9.6 PE=5 SV=1	opiNOG04272;opiNOG50433;opiNOG54624;euNOG24248	R	-	-	-	-
MSTRG.100085	ENSBGRG00000016986	MSTRG.100085.1	0	19[-]36302520-36303624	19[-]36190538-36326373	ARHGAP44	GO:0005515;GO:0005737;GO:0007165;GO:0005515;GO:0005737;GO:0007165;GO:0005515;GO:0005737;GO:0007165;GO:0005515;GO:0005737;GO:0007165;GO:0005096;GO:0005515;GO:0005543;GO:0005737;GO:0007165;GO:0031256;GO:0031267;GO:0032956;GO:0035021;GO:0043087;GO:0043197;GO:0061001;GO:0098886;GO:0098887;GO:0098978;GO:0099010;GO:0099152;GO:0005515;GO:0005737;GO:0007165;	K21067	Rho GTPase activating protein 44 [Source:HGNC Symbol;Acc:HGNC:29096]	sp|Q5SSM3|RHG44_MOUSE Rho GTPase-activating protein 44 OS=Mus musculus OX=10090 GN=Arhgap44 PE=1 SV=1	veNOG00430	T	GO:0007165//signal transduction;GO:0007165//signal transduction;GO:0007165//signal transduction;GO:0007165//signal transduction;GO:0007165//signal transduction;GO:0032956//regulation of actin cytoskeleton organization;GO:0035021//negative regulation of Rac protein signal transduction;GO:0043087//regulation of GTPase activity;GO:0061001//regulation of dendritic spine morphogenesis;GO:0098886//modi…	GO:0005737//cytoplasm;GO:0005737//cytoplasm;GO:0005737//cytoplasm;GO:0005737//cytoplasm;GO:0005737//cytoplasm;GO:0031256//leading edge membrane;GO:0043197//dendritic spine;GO:0098978//glutamatergic synapse;GO:0005737//cytoplasm;	GO:0005515//protein binding;GO:0005515//protein binding;GO:0005515//protein binding;GO:0005515//protein binding;GO:0005096//GTPase activator activity;GO:0005515//protein binding;GO:0005543//phospholipid binding;GO:0031267//small GTPase binding;GO:0005515//protein binding;	-
MSTRG.100085	ENSBGRG00000017767	MSTRG.100085.1	40932	19[-]36302520-36303624	19[-]36344556-36442920	MYOCD	GO:0000122;GO:0000785;GO:0001560;GO:0001570;GO:0001666;GO:0003231;GO:0003713;GO:0003713;GO:0005634;GO:0005634;GO:0005634;GO:0006357;GO:0006366;GO:0007507;GO:0008284;GO:0008285;GO:0010628;GO:0010659;GO:0010667;GO:0010832;GO:0030511;GO:0035035;GO:0035065;GO:0035886;GO:0042826;GO:0043388;GO:0043954;GO:0045661;GO:0045736;GO:0045893;GO:0045893;GO:0045944;GO:0045944;GO:0045987;GO:0048286;GO:0048565;GO:…	K22526	myocardin [Source:HGNC Symbol;Acc:HGNC:16067]	sp|Q7YR76|MYCD_PIG Myocardin OS=Sus scrofa OX=9823 GN=MYOCD PE=2 SV=1	veNOG00821	K	GO:0000122//negative regulation of transcription by RNA polymerase II;GO:0001560//regulation of cell growth by extracellular stimulus;GO:0001570//vasculogenesis;GO:0001666//response to hypoxia;GO:0003231//cardiac ventricle development;GO:0006357//regulation of transcription by RNA polymerase II;GO:0006366//transcription by RNA polymerase II;GO:0007507//heart development;GO:0008284//positive regul…	GO:0000785//chromatin;GO:0005634//nucleus;GO:0005634//nucleus;GO:0005634//nucleus;GO:0005634//nucleus;	GO:0003713//transcription coactivator activity;GO:0003713//transcription coactivator activity;GO:0035035//histone acetyltransferase binding;GO:0042826//histone deacetylase binding;GO:0061629//RNA polymerase II-specific DNA-binding transcription factor binding;GO:0070412//R-SMAD binding;GO:0140297//DNA-binding transcription factor binding;GO:0003713//transcription coactivator activity;	-
MSTRG.1001	ENSBGRG00000000037	MSTRG.1001.1	30851	1[-]17966005-17967228	1[+]17998079-18071143	CXADR	GO:0005178;GO:0005654;GO:0005737;GO:0005886;GO:0005911;GO:0005912;GO:0005923;GO:0007157;GO:0008013;GO:0010669;GO:0016323;GO:0016327;GO:0030054;GO:0030165;GO:0030593;GO:0031532;GO:0032991;GO:0045121;GO:0050839;GO:0070633;	K06788	CXADR Ig-like cell adhesion molecule [Source:HGNC Symbol;Acc:HGNC:2559]	sp|Q8WMV3|CXAR_BOVIN Coxsackievirus and adenovirus receptor homolog OS=Bos taurus OX=9913 GN=CXADR PE=2 SV=1	veNOG08870	T	GO:0007157//heterophilic cell-cell adhesion via plasma membrane cell adhesion molecules;GO:0010669//epithelial structure maintenance;GO:0030593//neutrophil chemotaxis;GO:0031532//actin cytoskeleton reorganization;GO:0070633//transepithelial transport;	GO:0005654//nucleoplasm;GO:0005737//cytoplasm;GO:0005886//plasma membrane;GO:0005911//cell-cell junction;GO:0005912//adherens junction;GO:0005923//bicellular tight junction;GO:0016323//basolateral plasma membrane;GO:0016327//apicolateral plasma membrane;GO:0030054//cell junction;GO:0032991//protein-containing complex;GO:0045121//membrane raft;	GO:0005178//integrin binding;GO:0008013//beta-catenin binding;GO:0030165//PDZ domain binding;GO:0050839//cell adhesion molecule binding;	ko05416(Viral myocarditis)
MSTRG.100101	ENSBGRG00000017742	MSTRG.100101.1	41825	19[-]36342758-36343258	19[+]36299914-36300933	-	-	-	-	sp|Q10126|YSM6_CAEEL Putative uncharacterized transposon-derived protein F52C9.6 OS=Caenorhabditis elegans OX=6239 GN=F52C9.6 PE=5 SV=1	opiNOG04272;opiNOG50433;opiNOG54624;euNOG24248	R	-	-	-	-
MSTRG.100101	ENSBGRG00000016986	MSTRG.100101.1	16385	19[-]36342758-36343258	19[-]36190538-36326373	ARHGAP44	GO:0005515;GO:0005737;GO:0007165;GO:0005515;GO:0005737;GO:0007165;GO:0005515;GO:0005737;GO:0007165;GO:0005515;GO:0005737;GO:0007165;GO:0005096;GO:0005515;GO:0005543;GO:0005737;GO:0007165;GO:0031256;GO:0031267;GO:0032956;GO:0035021;GO:0043087;GO:0043197;GO:0061001;GO:0098886;GO:0098887;GO:0098978;GO:0099010;GO:0099152;GO:0005515;GO:0005737;GO:0007165;	K21067	Rho GTPase activating protein 44 [Source:HGNC Symbol;Acc:HGNC:29096]	sp|Q5SSM3|RHG44_MOUSE Rho GTPase-activating protein 44 OS=Mus musculus OX=10090 GN=Arhgap44 PE=1 SV=1	veNOG00430	T	GO:0007165//signal transduction;GO:0007165//signal transduction;GO:0007165//signal transduction;GO:0007165//signal transduction;GO:0007165//signal transduction;GO:0032956//regulation of actin cytoskeleton organization;GO:0035021//negative regulation of Rac protein signal transduction;GO:0043087//regulation of GTPase activity;GO:0061001//regulation of dendritic spine morphogenesis;GO:0098886//modi…	GO:0005737//cytoplasm;GO:0005737//cytoplasm;GO:0005737//cytoplasm;GO:0005737//cytoplasm;GO:0005737//cytoplasm;GO:0031256//leading edge membrane;GO:0043197//dendritic spine;GO:0098978//glutamatergic synapse;GO:0005737//cytoplasm;	GO:0005515//protein binding;GO:0005515//protein binding;GO:0005515//protein binding;GO:0005515//protein binding;GO:0005096//GTPase activator activity;GO:0005515//protein binding;GO:0005543//phospholipid binding;GO:0031267//small GTPase binding;GO:0005515//protein binding;	-
MSTRG.100101	ENSBGRG00000017767	MSTRG.100101.1	1298	19[-]36342758-36343258	19[-]36344556-36442920	MYOCD	GO:0000122;GO:0000785;GO:0001560;GO:0001570;GO:0001666;GO:0003231;GO:0003713;GO:0003713;GO:0005634;GO:0005634;GO:0005634;GO:0006357;GO:0006366;GO:0007507;GO:0008284;GO:0008285;GO:0010628;GO:0010659;GO:0010667;GO:0010832;GO:0030511;GO:0035035;GO:0035065;GO:0035886;GO:0042826;GO:0043388;GO:0043954;GO:0045661;GO:0045736;GO:0045893;GO:0045893;GO:0045944;GO:0045944;GO:0045987;GO:0048286;GO:0048565;GO:…	K22526	myocardin [Source:HGNC Symbol;Acc:HGNC:16067]	sp|Q7YR76|MYCD_PIG Myocardin OS=Sus scrofa OX=9823 GN=MYOCD PE=2 SV=1	veNOG00821	K	GO:0000122//negative regulation of transcription by RNA polymerase II;GO:0001560//regulation of cell growth by extracellular stimulus;GO:0001570//vasculogenesis;GO:0001666//response to hypoxia;GO:0003231//cardiac ventricle development;GO:0006357//regulation of transcription by RNA polymerase II;GO:0006366//transcription by RNA polymerase II;GO:0007507//heart development;GO:0008284//positive regul…	GO:0000785//chromatin;GO:0005634//nucleus;GO:0005634//nucleus;GO:0005634//nucleus;GO:0005634//nucleus;	GO:0003713//transcription coactivator activity;GO:0003713//transcription coactivator activity;GO:0035035//histone acetyltransferase binding;GO:0042826//histone deacetylase binding;GO:0061629//RNA polymerase II-specific DNA-binding transcription factor binding;GO:0070412//R-SMAD binding;GO:0140297//DNA-binding transcription factor binding;GO:0003713//transcription coactivator activity;	-
MSTRG.100109	ENSBGRG00000017742	MSTRG.100109.1	98149	19[-]36399082-36400493	19[+]36299914-36300933	-	-	-	-	sp|Q10126|YSM6_CAEEL Putative uncharacterized transposon-derived protein F52C9.6 OS=Caenorhabditis elegans OX=6239 GN=F52C9.6 PE=5 SV=1	opiNOG04272;opiNOG50433;opiNOG54624;euNOG24248	R	-	-	-	-
MSTRG.100109	ENSBGRG00000016986	MSTRG.100109.1	72709	19[-]36399082-36400493	19[-]36190538-36326373	ARHGAP44	GO:0005515;GO:0005737;GO:0007165;GO:0005515;GO:0005737;GO:0007165;GO:0005515;GO:0005737;GO:0007165;GO:0005515;GO:0005737;GO:0007165;GO:0005096;GO:0005515;GO:0005543;GO:0005737;GO:0007165;GO:0031256;GO:0031267;GO:0032956;GO:0035021;GO:0043087;GO:0043197;GO:0061001;GO:0098886;GO:0098887;GO:0098978;GO:0099010;GO:0099152;GO:0005515;GO:0005737;GO:0007165;	K21067	Rho GTPase activating protein 44 [Source:HGNC Symbol;Acc:HGNC:29096]	sp|Q5SSM3|RHG44_MOUSE Rho GTPase-activating protein 44 OS=Mus musculus OX=10090 GN=Arhgap44 PE=1 SV=1	veNOG00430	T	GO:0007165//signal transduction;GO:0007165//signal transduction;GO:0007165//signal transduction;GO:0007165//signal transduction;GO:0007165//signal transduction;GO:0032956//regulation of actin cytoskeleton organization;GO:0035021//negative regulation of Rac protein signal transduction;GO:0043087//regulation of GTPase activity;GO:0061001//regulation of dendritic spine morphogenesis;GO:0098886//modi…	GO:0005737//cytoplasm;GO:0005737//cytoplasm;GO:0005737//cytoplasm;GO:0005737//cytoplasm;GO:0005737//cytoplasm;GO:0031256//leading edge membrane;GO:0043197//dendritic spine;GO:0098978//glutamatergic synapse;GO:0005737//cytoplasm;	GO:0005515//protein binding;GO:0005515//protein binding;GO:0005515//protein binding;GO:0005515//protein binding;GO:0005096//GTPase activator activity;GO:0005515//protein binding;GO:0005543//phospholipid binding;GO:0031267//small GTPase binding;GO:0005515//protein binding;	-
MSTRG.100109	ENSBGRG00000017767	MSTRG.100109.1	0	19[-]36399082-36400493	19[-]36344556-36442920	MYOCD	GO:0000122;GO:0000785;GO:0001560;GO:0001570;GO:0001666;GO:0003231;GO:0003713;GO:0003713;GO:0005634;GO:0005634;GO:0005634;GO:0006357;GO:0006366;GO:0007507;GO:0008284;GO:0008285;GO:0010628;GO:0010659;GO:0010667;GO:0010832;GO:0030511;GO:0035035;GO:0035065;GO:0035886;GO:0042826;GO:0043388;GO:0043954;GO:0045661;GO:0045736;GO:0045893;GO:0045893;GO:0045944;GO:0045944;GO:0045987;GO:0048286;GO:0048565;GO:…	K22526	myocardin [Source:HGNC Symbol;Acc:HGNC:16067]	sp|Q7YR76|MYCD_PIG Myocardin OS=Sus scrofa OX=9823 GN=MYOCD PE=2 SV=1	veNOG00821	K	GO:0000122//negative regulation of transcription by RNA polymerase II;GO:0001560//regulation of cell growth by extracellular stimulus;GO:0001570//vasculogenesis;GO:0001666//response to hypoxia;GO:0003231//cardiac ventricle development;GO:0006357//regulation of transcription by RNA polymerase II;GO:0006366//transcription by RNA polymerase II;GO:0007507//heart development;GO:0008284//positive regul…	GO:0000785//chromatin;GO:0005634//nucleus;GO:0005634//nucleus;GO:0005634//nucleus;GO:0005634//nucleus;	GO:0003713//transcription coactivator activity;GO:0003713//transcription coactivator activity;GO:0035035//histone acetyltransferase binding;GO:0042826//histone deacetylase binding;GO:0061629//RNA polymerase II-specific DNA-binding transcription factor binding;GO:0070412//R-SMAD binding;GO:0140297//DNA-binding transcription factor binding;GO:0003713//transcription coactivator activity;	-
MSTRG.100117	ENSBGRG00000016986	MSTRG.100117.1	87638	19[-]36414011-36414798	19[-]36190538-36326373	ARHGAP44	GO:0005515;GO:0005737;GO:0007165;GO:0005515;GO:0005737;GO:0007165;GO:0005515;GO:0005737;GO:0007165;GO:0005515;GO:0005737;GO:0007165;GO:0005096;GO:0005515;GO:0005543;GO:0005737;GO:0007165;GO:0031256;GO:0031267;GO:0032956;GO:0035021;GO:0043087;GO:0043197;GO:0061001;GO:0098886;GO:0098887;GO:0098978;GO:0099010;GO:0099152;GO:0005515;GO:0005737;GO:0007165;	K21067	Rho GTPase activating protein 44 [Source:HGNC Symbol;Acc:HGNC:29096]	sp|Q5SSM3|RHG44_MOUSE Rho GTPase-activating protein 44 OS=Mus musculus OX=10090 GN=Arhgap44 PE=1 SV=1	veNOG00430	T	GO:0007165//signal transduction;GO:0007165//signal transduction;GO:0007165//signal transduction;GO:0007165//signal transduction;GO:0007165//signal transduction;GO:0032956//regulation of actin cytoskeleton organization;GO:0035021//negative regulation of Rac protein signal transduction;GO:0043087//regulation of GTPase activity;GO:0061001//regulation of dendritic spine morphogenesis;GO:0098886//modi…	GO:0005737//cytoplasm;GO:0005737//cytoplasm;GO:0005737//cytoplasm;GO:0005737//cytoplasm;GO:0005737//cytoplasm;GO:0031256//leading edge membrane;GO:0043197//dendritic spine;GO:0098978//glutamatergic synapse;GO:0005737//cytoplasm;	GO:0005515//protein binding;GO:0005515//protein binding;GO:0005515//protein binding;GO:0005515//protein binding;GO:0005096//GTPase activator activity;GO:0005515//protein binding;GO:0005543//phospholipid binding;GO:0031267//small GTPase binding;GO:0005515//protein binding;	-
MSTRG.100117	ENSBGRG00000017767	MSTRG.100117.1	0	19[-]36414011-36414798	19[-]36344556-36442920	MYOCD	GO:0000122;GO:0000785;GO:0001560;GO:0001570;GO:0001666;GO:0003231;GO:0003713;GO:0003713;GO:0005634;GO:0005634;GO:0005634;GO:0006357;GO:0006366;GO:0007507;GO:0008284;GO:0008285;GO:0010628;GO:0010659;GO:0010667;GO:0010832;GO:0030511;GO:0035035;GO:0035065;GO:0035886;GO:0042826;GO:0043388;GO:0043954;GO:0045661;GO:0045736;GO:0045893;GO:0045893;GO:0045944;GO:0045944;GO:0045987;GO:0048286;GO:0048565;GO:…	K22526	myocardin [Source:HGNC Symbol;Acc:HGNC:16067]	sp|Q7YR76|MYCD_PIG Myocardin OS=Sus scrofa OX=9823 GN=MYOCD PE=2 SV=1	veNOG00821	K	GO:0000122//negative regulation of transcription by RNA polymerase II;GO:0001560//regulation of cell growth by extracellular stimulus;GO:0001570//vasculogenesis;GO:0001666//response to hypoxia;GO:0003231//cardiac ventricle development;GO:0006357//regulation of transcription by RNA polymerase II;GO:0006366//transcription by RNA polymerase II;GO:0007507//heart development;GO:0008284//positive regul…	GO:0000785//chromatin;GO:0005634//nucleus;GO:0005634//nucleus;GO:0005634//nucleus;GO:0005634//nucleus;	GO:0003713//transcription coactivator activity;GO:0003713//transcription coactivator activity;GO:0035035//histone acetyltransferase binding;GO:0042826//histone deacetylase binding;GO:0061629//RNA polymerase II-specific DNA-binding transcription factor binding;GO:0070412//R-SMAD binding;GO:0140297//DNA-binding transcription factor binding;GO:0003713//transcription coactivator activity;	-
MSTRG.100123	ENSBGRG00000016986	MSTRG.100123.1	98693	19[-]36425066-36426670	19[-]36190538-36326373	ARHGAP44	GO:0005515;GO:0005737;GO:0007165;GO:0005515;GO:0005737;GO:0007165;GO:0005515;GO:0005737;GO:0007165;GO:0005515;GO:0005737;GO:0007165;GO:0005096;GO:0005515;GO:0005543;GO:0005737;GO:0007165;GO:0031256;GO:0031267;GO:0032956;GO:0035021;GO:0043087;GO:0043197;GO:0061001;GO:0098886;GO:0098887;GO:0098978;GO:0099010;GO:0099152;GO:0005515;GO:0005737;GO:0007165;	K21067	Rho GTPase activating protein 44 [Source:HGNC Symbol;Acc:HGNC:29096]	sp|Q5SSM3|RHG44_MOUSE Rho GTPase-activating protein 44 OS=Mus musculus OX=10090 GN=Arhgap44 PE=1 SV=1	veNOG00430	T	GO:0007165//signal transduction;GO:0007165//signal transduction;GO:0007165//signal transduction;GO:0007165//signal transduction;GO:0007165//signal transduction;GO:0032956//regulation of actin cytoskeleton organization;GO:0035021//negative regulation of Rac protein signal transduction;GO:0043087//regulation of GTPase activity;GO:0061001//regulation of dendritic spine morphogenesis;GO:0098886//modi…	GO:0005737//cytoplasm;GO:0005737//cytoplasm;GO:0005737//cytoplasm;GO:0005737//cytoplasm;GO:0005737//cytoplasm;GO:0031256//leading edge membrane;GO:0043197//dendritic spine;GO:0098978//glutamatergic synapse;GO:0005737//cytoplasm;	GO:0005515//protein binding;GO:0005515//protein binding;GO:0005515//protein binding;GO:0005515//protein binding;GO:0005096//GTPase activator activity;GO:0005515//protein binding;GO:0005543//phospholipid binding;GO:0031267//small GTPase binding;GO:0005515//protein binding;	-
MSTRG.100123	ENSBGRG00000017767	MSTRG.100123.1	0	19[-]36425066-36426670	19[-]36344556-36442920	MYOCD	GO:0000122;GO:0000785;GO:0001560;GO:0001570;GO:0001666;GO:0003231;GO:0003713;GO:0003713;GO:0005634;GO:0005634;GO:0005634;GO:0006357;GO:0006366;GO:0007507;GO:0008284;GO:0008285;GO:0010628;GO:0010659;GO:0010667;GO:0010832;GO:0030511;GO:0035035;GO:0035065;GO:0035886;GO:0042826;GO:0043388;GO:0043954;GO:0045661;GO:0045736;GO:0045893;GO:0045893;GO:0045944;GO:0045944;GO:0045987;GO:0048286;GO:0048565;GO:…	K22526	myocardin [Source:HGNC Symbol;Acc:HGNC:16067]	sp|Q7YR76|MYCD_PIG Myocardin OS=Sus scrofa OX=9823 GN=MYOCD PE=2 SV=1	veNOG00821	K	GO:0000122//negative regulation of transcription by RNA polymerase II;GO:0001560//regulation of cell growth by extracellular stimulus;GO:0001570//vasculogenesis;GO:0001666//response to hypoxia;GO:0003231//cardiac ventricle development;GO:0006357//regulation of transcription by RNA polymerase II;GO:0006366//transcription by RNA polymerase II;GO:0007507//heart development;GO:0008284//positive regul…	GO:0000785//chromatin;GO:0005634//nucleus;GO:0005634//nucleus;GO:0005634//nucleus;GO:0005634//nucleus;	GO:0003713//transcription coactivator activity;GO:0003713//transcription coactivator activity;GO:0035035//histone acetyltransferase binding;GO:0042826//histone deacetylase binding;GO:0061629//RNA polymerase II-specific DNA-binding transcription factor binding;GO:0070412//R-SMAD binding;GO:0140297//DNA-binding transcription factor binding;GO:0003713//transcription coactivator activity;	-
MSTRG.100127	ENSBGRG00000017767	MSTRG.100127.1	0	19[-]36432566-36434976	19[-]36344556-36442920	MYOCD	GO:0000122;GO:0000785;GO:0001560;GO:0001570;GO:0001666;GO:0003231;GO:0003713;GO:0003713;GO:0005634;GO:0005634;GO:0005634;GO:0006357;GO:0006366;GO:0007507;GO:0008284;GO:0008285;GO:0010628;GO:0010659;GO:0010667;GO:0010832;GO:0030511;GO:0035035;GO:0035065;GO:0035886;GO:0042826;GO:0043388;GO:0043954;GO:0045661;GO:0045736;GO:0045893;GO:0045893;GO:0045944;GO:0045944;GO:0045987;GO:0048286;GO:0048565;GO:…	K22526	myocardin [Source:HGNC Symbol;Acc:HGNC:16067]	sp|Q7YR76|MYCD_PIG Myocardin OS=Sus scrofa OX=9823 GN=MYOCD PE=2 SV=1	veNOG00821	K	GO:0000122//negative regulation of transcription by RNA polymerase II;GO:0001560//regulation of cell growth by extracellular stimulus;GO:0001570//vasculogenesis;GO:0001666//response to hypoxia;GO:0003231//cardiac ventricle development;GO:0006357//regulation of transcription by RNA polymerase II;GO:0006366//transcription by RNA polymerase II;GO:0007507//heart development;GO:0008284//positive regul…	GO:0000785//chromatin;GO:0005634//nucleus;GO:0005634//nucleus;GO:0005634//nucleus;GO:0005634//nucleus;	GO:0003713//transcription coactivator activity;GO:0003713//transcription coactivator activity;GO:0035035//histone acetyltransferase binding;GO:0042826//histone deacetylase binding;GO:0061629//RNA polymerase II-specific DNA-binding transcription factor binding;GO:0070412//R-SMAD binding;GO:0140297//DNA-binding transcription factor binding;GO:0003713//transcription coactivator activity;	-
MSTRG.100128	ENSBGRG00000017767	MSTRG.100128.1	0	19[-]36432967-36435410	19[-]36344556-36442920	MYOCD	GO:0000122;GO:0000785;GO:0001560;GO:0001570;GO:0001666;GO:0003231;GO:0003713;GO:0003713;GO:0005634;GO:0005634;GO:0005634;GO:0006357;GO:0006366;GO:0007507;GO:0008284;GO:0008285;GO:0010628;GO:0010659;GO:0010667;GO:0010832;GO:0030511;GO:0035035;GO:0035065;GO:0035886;GO:0042826;GO:0043388;GO:0043954;GO:0045661;GO:0045736;GO:0045893;GO:0045893;GO:0045944;GO:0045944;GO:0045987;GO:0048286;GO:0048565;GO:…	K22526	myocardin [Source:HGNC Symbol;Acc:HGNC:16067]	sp|Q7YR76|MYCD_PIG Myocardin OS=Sus scrofa OX=9823 GN=MYOCD PE=2 SV=1	veNOG00821	K	GO:0000122//negative regulation of transcription by RNA polymerase II;GO:0001560//regulation of cell growth by extracellular stimulus;GO:0001570//vasculogenesis;GO:0001666//response to hypoxia;GO:0003231//cardiac ventricle development;GO:0006357//regulation of transcription by RNA polymerase II;GO:0006366//transcription by RNA polymerase II;GO:0007507//heart development;GO:0008284//positive regul…	GO:0000785//chromatin;GO:0005634//nucleus;GO:0005634//nucleus;GO:0005634//nucleus;GO:0005634//nucleus;	GO:0003713//transcription coactivator activity;GO:0003713//transcription coactivator activity;GO:0035035//histone acetyltransferase binding;GO:0042826//histone deacetylase binding;GO:0061629//RNA polymerase II-specific DNA-binding transcription factor binding;GO:0070412//R-SMAD binding;GO:0140297//DNA-binding transcription factor binding;GO:0003713//transcription coactivator activity;	-
MSTRG.100129	ENSBGRG00000017767	MSTRG.100129.1	0	19[-]36433323-36435863	19[-]36344556-36442920	MYOCD	GO:0000122;GO:0000785;GO:0001560;GO:0001570;GO:0001666;GO:0003231;GO:0003713;GO:0003713;GO:0005634;GO:0005634;GO:0005634;GO:0006357;GO:0006366;GO:0007507;GO:0008284;GO:0008285;GO:0010628;GO:0010659;GO:0010667;GO:0010832;GO:0030511;GO:0035035;GO:0035065;GO:0035886;GO:0042826;GO:0043388;GO:0043954;GO:0045661;GO:0045736;GO:0045893;GO:0045893;GO:0045944;GO:0045944;GO:0045987;GO:0048286;GO:0048565;GO:…	K22526	myocardin [Source:HGNC Symbol;Acc:HGNC:16067]	sp|Q7YR76|MYCD_PIG Myocardin OS=Sus scrofa OX=9823 GN=MYOCD PE=2 SV=1	veNOG00821	K	GO:0000122//negative regulation of transcription by RNA polymerase II;GO:0001560//regulation of cell growth by extracellular stimulus;GO:0001570//vasculogenesis;GO:0001666//response to hypoxia;GO:0003231//cardiac ventricle development;GO:0006357//regulation of transcription by RNA polymerase II;GO:0006366//transcription by RNA polymerase II;GO:0007507//heart development;GO:0008284//positive regul…	GO:0000785//chromatin;GO:0005634//nucleus;GO:0005634//nucleus;GO:0005634//nucleus;GO:0005634//nucleus;	GO:0003713//transcription coactivator activity;GO:0003713//transcription coactivator activity;GO:0035035//histone acetyltransferase binding;GO:0042826//histone deacetylase binding;GO:0061629//RNA polymerase II-specific DNA-binding transcription factor binding;GO:0070412//R-SMAD binding;GO:0140297//DNA-binding transcription factor binding;GO:0003713//transcription coactivator activity;	-
MSTRG.10014	ENSBGRG00000014790	MSTRG.10014.1	9346	1[-]118516186-118517324	1[+]118526670-118533787	LXN	GO:0008191;GO:0050965;	K23594	latexin [Source:HGNC Symbol;Acc:HGNC:13347]	sp|P70202|LXN_MOUSE Latexin OS=Mus musculus OX=10090 GN=Lxn PE=1 SV=2	veNOG12211	R	GO:0050965//detection of temperature stimulus involved in sensory perception of pain;	-	GO:0008191//metalloendopeptidase inhibitor activity;	-
MSTRG.10014	ENSBGRG00000014425	MSTRG.10014.1	8237	1[-]118516186-118517324	1[+]118460976-118507949	RARRES1	GO:0008285;	K23595	retinoic acid receptor responder 1 [Source:HGNC Symbol;Acc:HGNC:9867]	sp|P49788|TIG1_HUMAN Retinoic acid receptor responder protein 1 OS=Homo sapiens OX=9606 GN=RARRES1 PE=1 SV=2	veNOG09710	T	GO:0008285//negative regulation of cell population proliferation;	-	-	-
MSTRG.10014	ENSBGRG00000014908	MSTRG.10014.1	59731	1[-]118516186-118517324	1[-]118577055-118612617	MLF1	-	K15622	myeloid leukemia factor 1 [Source:HGNC Symbol;Acc:HGNC:7125]	sp|Q32KY3|MLF1_BOVIN Myeloid leukemia factor 1 OS=Bos taurus OX=9913 GN=MLF1 PE=2 SV=1	veNOG16002	K	-	-	-	ko05202(Transcriptional misregulation in cancer)
MSTRG.10014	ENSBGRG00000014469	MSTRG.10014.1	0	1[-]118516186-118517324	1[-]118512012-118569745	GFM1	GO:0003746;GO:0003746;GO:0003924;GO:0003924;GO:0005525;GO:0006414;GO:0070125;	K02355	G elongation factor mitochondrial 1 [Source:HGNC Symbol;Acc:HGNC:13780]	sp|Q07803|EFGM_RAT Elongation factor G, mitochondrial OS=Rattus norvegicus OX=10116 GN=Gfm1 PE=1 SV=2	veNOG12485	J	GO:0006414//translational elongation;GO:0070125//mitochondrial translational elongation;	-	GO:0003746//translation elongation factor activity;GO:0003746//translation elongation factor activity;GO:0003924//GTPase activity;GO:0003924//GTPase activity;GO:0005525//GTP binding;	-
MSTRG.10016	ENSBGRG00000014790	MSTRG.10016.1	532	1[+]118534319-118535582	1[+]118526670-118533787	LXN	GO:0008191;GO:0050965;	K23594	latexin [Source:HGNC Symbol;Acc:HGNC:13347]	sp|P70202|LXN_MOUSE Latexin OS=Mus musculus OX=10090 GN=Lxn PE=1 SV=2	veNOG12211	R	GO:0050965//detection of temperature stimulus involved in sensory perception of pain;	-	GO:0008191//metalloendopeptidase inhibitor activity;	-
MSTRG.10016	ENSBGRG00000014425	MSTRG.10016.1	26370	1[+]118534319-118535582	1[+]118460976-118507949	RARRES1	GO:0008285;	K23595	retinoic acid receptor responder 1 [Source:HGNC Symbol;Acc:HGNC:9867]	sp|P49788|TIG1_HUMAN Retinoic acid receptor responder protein 1 OS=Homo sapiens OX=9606 GN=RARRES1 PE=1 SV=2	veNOG09710	T	GO:0008285//negative regulation of cell population proliferation;	-	-	-
MSTRG.10016	ENSBGRG00000014908	MSTRG.10016.1	41473	1[+]118534319-118535582	1[-]118577055-118612617	MLF1	-	K15622	myeloid leukemia factor 1 [Source:HGNC Symbol;Acc:HGNC:7125]	sp|Q32KY3|MLF1_BOVIN Myeloid leukemia factor 1 OS=Bos taurus OX=9913 GN=MLF1 PE=2 SV=1	veNOG16002	K	-	-	-	ko05202(Transcriptional misregulation in cancer)
MSTRG.10016	ENSBGRG00000014469	MSTRG.10016.1	0	1[+]118534319-118535582	1[-]118512012-118569745	GFM1	GO:0003746;GO:0003746;GO:0003924;GO:0003924;GO:0005525;GO:0006414;GO:0070125;	K02355	G elongation factor mitochondrial 1 [Source:HGNC Symbol;Acc:HGNC:13780]	sp|Q07803|EFGM_RAT Elongation factor G, mitochondrial OS=Rattus norvegicus OX=10116 GN=Gfm1 PE=1 SV=2	veNOG12485	J	GO:0006414//translational elongation;GO:0070125//mitochondrial translational elongation;	-	GO:0003746//translation elongation factor activity;GO:0003746//translation elongation factor activity;GO:0003924//GTPase activity;GO:0003924//GTPase activity;GO:0005525//GTP binding;	-
MSTRG.100166	ENSBGRG00000017964	MSTRG.100166.2,MSTRG.100166.1	243	19[-]36853368-36856136	19[-]36856379-36943042	MAP2K4	GO:0000165;GO:0004672;GO:0005524;GO:0006468;GO:0009611;GO:0034393;GO:0071260;GO:2000672;GO:0004672;GO:0005524;GO:0006468;	K04430	mitogen-activated protein kinase kinase 4 [Source:HGNC Symbol;Acc:HGNC:6844]	sp|P45985|MP2K4_HUMAN Dual specificity mitogen-activated protein kinase kinase 4 OS=Homo sapiens OX=9606 GN=MAP2K4 PE=1 SV=1	veNOG07252	T	GO:0000165//MAPK cascade;GO:0006468//protein phosphorylation;GO:0009611//response to wounding;GO:0034393//positive regulation of smooth muscle cell apoptotic process;GO:0071260//cellular response to mechanical stimulus;GO:2000672//negative regulation of motor neuron apoptotic process;GO:0006468//protein phosphorylation;	-	GO:0004672//protein kinase activity;GO:0005524//ATP binding;GO:0004672//protein kinase activity;GO:0005524//ATP binding;	ko05418(Fluid shear stress and atherosclerosis);ko05417(Lipid and atherosclerosis);ko05208(Chemical carcinogenesis - reactive oxygen species);ko05169(Epstein-Barr virus infection);ko05167(Kaposi sarcoma-associated herpesvirus infection);ko05166(Human T-cell leukemia virus 1 infection);ko05161(Hepatitis B);ko05142(Chagas disease);ko05135(Yersinia infection);ko05132(Salmonella infection);ko05120(Ep…
MSTRG.100168	ENSBGRG00000017964	MSTRG.100168.1	0	19[-]36860409-36861650	19[-]36856379-36943042	MAP2K4	GO:0000165;GO:0004672;GO:0005524;GO:0006468;GO:0009611;GO:0034393;GO:0071260;GO:2000672;GO:0004672;GO:0005524;GO:0006468;	K04430	mitogen-activated protein kinase kinase 4 [Source:HGNC Symbol;Acc:HGNC:6844]	sp|P45985|MP2K4_HUMAN Dual specificity mitogen-activated protein kinase kinase 4 OS=Homo sapiens OX=9606 GN=MAP2K4 PE=1 SV=1	veNOG07252	T	GO:0000165//MAPK cascade;GO:0006468//protein phosphorylation;GO:0009611//response to wounding;GO:0034393//positive regulation of smooth muscle cell apoptotic process;GO:0071260//cellular response to mechanical stimulus;GO:2000672//negative regulation of motor neuron apoptotic process;GO:0006468//protein phosphorylation;	-	GO:0004672//protein kinase activity;GO:0005524//ATP binding;GO:0004672//protein kinase activity;GO:0005524//ATP binding;	ko05418(Fluid shear stress and atherosclerosis);ko05417(Lipid and atherosclerosis);ko05208(Chemical carcinogenesis - reactive oxygen species);ko05169(Epstein-Barr virus infection);ko05167(Kaposi sarcoma-associated herpesvirus infection);ko05166(Human T-cell leukemia virus 1 infection);ko05161(Hepatitis B);ko05142(Chagas disease);ko05135(Yersinia infection);ko05132(Salmonella infection);ko05120(Ep…
MSTRG.100169	ENSBGRG00000018061	MSTRG.100169.1,MSTRG.100169.2	90108	19[-]36871927-36873301	19[+]36963409-36978973	ZNF18	GO:0006355;	K09229	zinc finger protein 18 [Source:HGNC Symbol;Acc:HGNC:12969]	sp|P17022|ZNF18_HUMAN Zinc finger protein 18 OS=Homo sapiens OX=9606 GN=ZNF18 PE=1 SV=2	veNOG11375	K	GO:0006355//regulation of transcription, DNA-templated;	-	-	-
MSTRG.100169	ENSBGRG00000017964	MSTRG.100169.1,MSTRG.100169.2	0	19[-]36871927-36873301	19[-]36856379-36943042	MAP2K4	GO:0000165;GO:0004672;GO:0005524;GO:0006468;GO:0009611;GO:0034393;GO:0071260;GO:2000672;GO:0004672;GO:0005524;GO:0006468;	K04430	mitogen-activated protein kinase kinase 4 [Source:HGNC Symbol;Acc:HGNC:6844]	sp|P45985|MP2K4_HUMAN Dual specificity mitogen-activated protein kinase kinase 4 OS=Homo sapiens OX=9606 GN=MAP2K4 PE=1 SV=1	veNOG07252	T	GO:0000165//MAPK cascade;GO:0006468//protein phosphorylation;GO:0009611//response to wounding;GO:0034393//positive regulation of smooth muscle cell apoptotic process;GO:0071260//cellular response to mechanical stimulus;GO:2000672//negative regulation of motor neuron apoptotic process;GO:0006468//protein phosphorylation;	-	GO:0004672//protein kinase activity;GO:0005524//ATP binding;GO:0004672//protein kinase activity;GO:0005524//ATP binding;	ko05418(Fluid shear stress and atherosclerosis);ko05417(Lipid and atherosclerosis);ko05208(Chemical carcinogenesis - reactive oxygen species);ko05169(Epstein-Barr virus infection);ko05167(Kaposi sarcoma-associated herpesvirus infection);ko05166(Human T-cell leukemia virus 1 infection);ko05161(Hepatitis B);ko05142(Chagas disease);ko05135(Yersinia infection);ko05132(Salmonella infection);ko05120(Ep…
MSTRG.10017	ENSBGRG00000015425	MSTRG.10017.1	85665	1[-]118556370-118556917	1[-]118642582-119113781	RSRC1	GO:0000380;GO:0000380;GO:0000398;GO:0000398;GO:0005634;GO:0005737;GO:0006468;GO:0006913;GO:0008380;GO:0016607;GO:0046677;GO:0000380;GO:0000398;GO:0000380;GO:0000398;GO:0000380;GO:0000398;	K24594	arginine and serine rich coiled-coil 1 [Source:HGNC Symbol;Acc:HGNC:24152]	sp|Q2T9Y0|RSRC1_BOVIN Serine/Arginine-related protein 53 OS=Bos taurus OX=9913 GN=RSRC1 PE=2 SV=1	veNOG18112	J	GO:0000380//alternative mRNA splicing, via spliceosome;GO:0000380//alternative mRNA splicing, via spliceosome;GO:0000398//mRNA splicing, via spliceosome;GO:0000398//mRNA splicing, via spliceosome;GO:0006468//protein phosphorylation;GO:0006913//nucleocytoplasmic transport;GO:0008380//RNA splicing;GO:0046677//response to antibiotic;GO:0000380//alternative mRNA splicing, via spliceosome;GO:0000398//…	GO:0005634//nucleus;GO:0005737//cytoplasm;GO:0016607//nuclear speck;	-	-
MSTRG.10017	ENSBGRG00000014790	MSTRG.10017.1	22583	1[-]118556370-118556917	1[+]118526670-118533787	LXN	GO:0008191;GO:0050965;	K23594	latexin [Source:HGNC Symbol;Acc:HGNC:13347]	sp|P70202|LXN_MOUSE Latexin OS=Mus musculus OX=10090 GN=Lxn PE=1 SV=2	veNOG12211	R	GO:0050965//detection of temperature stimulus involved in sensory perception of pain;	-	GO:0008191//metalloendopeptidase inhibitor activity;	-
MSTRG.10017	ENSBGRG00000014425	MSTRG.10017.1	48421	1[-]118556370-118556917	1[+]118460976-118507949	RARRES1	GO:0008285;	K23595	retinoic acid receptor responder 1 [Source:HGNC Symbol;Acc:HGNC:9867]	sp|P49788|TIG1_HUMAN Retinoic acid receptor responder protein 1 OS=Homo sapiens OX=9606 GN=RARRES1 PE=1 SV=2	veNOG09710	T	GO:0008285//negative regulation of cell population proliferation;	-	-	-
MSTRG.10017	ENSBGRG00000014908	MSTRG.10017.1	20138	1[-]118556370-118556917	1[-]118577055-118612617	MLF1	-	K15622	myeloid leukemia factor 1 [Source:HGNC Symbol;Acc:HGNC:7125]	sp|Q32KY3|MLF1_BOVIN Myeloid leukemia factor 1 OS=Bos taurus OX=9913 GN=MLF1 PE=2 SV=1	veNOG16002	K	-	-	-	ko05202(Transcriptional misregulation in cancer)
MSTRG.10017	ENSBGRG00000014469	MSTRG.10017.1	0	1[-]118556370-118556917	1[-]118512012-118569745	GFM1	GO:0003746;GO:0003746;GO:0003924;GO:0003924;GO:0005525;GO:0006414;GO:0070125;	K02355	G elongation factor mitochondrial 1 [Source:HGNC Symbol;Acc:HGNC:13780]	sp|Q07803|EFGM_RAT Elongation factor G, mitochondrial OS=Rattus norvegicus OX=10116 GN=Gfm1 PE=1 SV=2	veNOG12485	J	GO:0006414//translational elongation;GO:0070125//mitochondrial translational elongation;	-	GO:0003746//translation elongation factor activity;GO:0003746//translation elongation factor activity;GO:0003924//GTPase activity;GO:0003924//GTPase activity;GO:0005525//GTP binding;	-
MSTRG.100170	ENSBGRG00000018061	MSTRG.100170.1	84988	19[-]36876942-36878421	19[+]36963409-36978973	ZNF18	GO:0006355;	K09229	zinc finger protein 18 [Source:HGNC Symbol;Acc:HGNC:12969]	sp|P17022|ZNF18_HUMAN Zinc finger protein 18 OS=Homo sapiens OX=9606 GN=ZNF18 PE=1 SV=2	veNOG11375	K	GO:0006355//regulation of transcription, DNA-templated;	-	-	-
MSTRG.100170	ENSBGRG00000017964	MSTRG.100170.1	0	19[-]36876942-36878421	19[-]36856379-36943042	MAP2K4	GO:0000165;GO:0004672;GO:0005524;GO:0006468;GO:0009611;GO:0034393;GO:0071260;GO:2000672;GO:0004672;GO:0005524;GO:0006468;	K04430	mitogen-activated protein kinase kinase 4 [Source:HGNC Symbol;Acc:HGNC:6844]	sp|P45985|MP2K4_HUMAN Dual specificity mitogen-activated protein kinase kinase 4 OS=Homo sapiens OX=9606 GN=MAP2K4 PE=1 SV=1	veNOG07252	T	GO:0000165//MAPK cascade;GO:0006468//protein phosphorylation;GO:0009611//response to wounding;GO:0034393//positive regulation of smooth muscle cell apoptotic process;GO:0071260//cellular response to mechanical stimulus;GO:2000672//negative regulation of motor neuron apoptotic process;GO:0006468//protein phosphorylation;	-	GO:0004672//protein kinase activity;GO:0005524//ATP binding;GO:0004672//protein kinase activity;GO:0005524//ATP binding;	ko05418(Fluid shear stress and atherosclerosis);ko05417(Lipid and atherosclerosis);ko05208(Chemical carcinogenesis - reactive oxygen species);ko05169(Epstein-Barr virus infection);ko05167(Kaposi sarcoma-associated herpesvirus infection);ko05166(Human T-cell leukemia virus 1 infection);ko05161(Hepatitis B);ko05142(Chagas disease);ko05135(Yersinia infection);ko05132(Salmonella infection);ko05120(Ep…
MSTRG.100171	ENSBGRG00000018061	MSTRG.100171.1	84069	19[-]36877758-36879340	19[+]36963409-36978973	ZNF18	GO:0006355;	K09229	zinc finger protein 18 [Source:HGNC Symbol;Acc:HGNC:12969]	sp|P17022|ZNF18_HUMAN Zinc finger protein 18 OS=Homo sapiens OX=9606 GN=ZNF18 PE=1 SV=2	veNOG11375	K	GO:0006355//regulation of transcription, DNA-templated;	-	-	-
MSTRG.100171	ENSBGRG00000017964	MSTRG.100171.1	0	19[-]36877758-36879340	19[-]36856379-36943042	MAP2K4	GO:0000165;GO:0004672;GO:0005524;GO:0006468;GO:0009611;GO:0034393;GO:0071260;GO:2000672;GO:0004672;GO:0005524;GO:0006468;	K04430	mitogen-activated protein kinase kinase 4 [Source:HGNC Symbol;Acc:HGNC:6844]	sp|P45985|MP2K4_HUMAN Dual specificity mitogen-activated protein kinase kinase 4 OS=Homo sapiens OX=9606 GN=MAP2K4 PE=1 SV=1	veNOG07252	T	GO:0000165//MAPK cascade;GO:0006468//protein phosphorylation;GO:0009611//response to wounding;GO:0034393//positive regulation of smooth muscle cell apoptotic process;GO:0071260//cellular response to mechanical stimulus;GO:2000672//negative regulation of motor neuron apoptotic process;GO:0006468//protein phosphorylation;	-	GO:0004672//protein kinase activity;GO:0005524//ATP binding;GO:0004672//protein kinase activity;GO:0005524//ATP binding;	ko05418(Fluid shear stress and atherosclerosis);ko05417(Lipid and atherosclerosis);ko05208(Chemical carcinogenesis - reactive oxygen species);ko05169(Epstein-Barr virus infection);ko05167(Kaposi sarcoma-associated herpesvirus infection);ko05166(Human T-cell leukemia virus 1 infection);ko05161(Hepatitis B);ko05142(Chagas disease);ko05135(Yersinia infection);ko05132(Salmonella infection);ko05120(Ep…
MSTRG.100172	ENSBGRG00000018182	MSTRG.100172.1	96852	19[-]36884589-36885488	19[-]36982340-37302004	DNAH9	GO:0003341;GO:0003341;GO:0005524;GO:0005858;GO:0005930;GO:0007018;GO:0008569;GO:0030286;GO:0031514;GO:0036157;GO:0045505;GO:0051649;GO:0051959;GO:0090660;GO:0097729;GO:0097729;GO:0120135;GO:0120135;GO:0120197;GO:0003341;GO:0005524;GO:0005858;GO:0007018;GO:0008569;GO:0030286;GO:0045505;GO:0051959;	K10408	dynein axonemal heavy chain 9 [Source:HGNC Symbol;Acc:HGNC:2953]	sp|Q9NYC9|DYH9_HUMAN Dynein axonemal heavy chain 9 OS=Homo sapiens OX=9606 GN=DNAH9 PE=1 SV=3	veNOG05090	Z	GO:0003341//cilium movement;GO:0003341//cilium movement;GO:0007018//microtubule-based movement;GO:0051649//establishment of localization in cell;GO:0090660//cerebrospinal fluid circulation;GO:0120197//mucociliary clearance;GO:0003341//cilium movement;GO:0007018//microtubule-based movement;	GO:0005858//axonemal dynein complex;GO:0005930//axoneme;GO:0030286//dynein complex;GO:0031514//motile cilium;GO:0036157//outer dynein arm;GO:0097729//9+2 motile cilium;GO:0097729//9+2 motile cilium;GO:0120135//distal portion of axoneme;GO:0120135//distal portion of axoneme;GO:0005858//axonemal dynein complex;GO:0030286//dynein complex;	GO:0005524//ATP binding;GO:0008569//minus-end-directed microtubule motor activity;GO:0045505//dynein intermediate chain binding;GO:0051959//dynein light intermediate chain binding;GO:0005524//ATP binding;GO:0008569//minus-end-directed microtubule motor activity;GO:0045505//dynein intermediate chain binding;GO:0051959//dynein light intermediate chain binding;	ko05022(Pathways of neurodegeneration - multiple diseases);ko05016(Huntington disease);ko05014(Amyotrophic lateral sclerosis)
MSTRG.100172	ENSBGRG00000018061	MSTRG.100172.1	77921	19[-]36884589-36885488	19[+]36963409-36978973	ZNF18	GO:0006355;	K09229	zinc finger protein 18 [Source:HGNC Symbol;Acc:HGNC:12969]	sp|P17022|ZNF18_HUMAN Zinc finger protein 18 OS=Homo sapiens OX=9606 GN=ZNF18 PE=1 SV=2	veNOG11375	K	GO:0006355//regulation of transcription, DNA-templated;	-	-	-
MSTRG.100172	ENSBGRG00000017964	MSTRG.100172.1	0	19[-]36884589-36885488	19[-]36856379-36943042	MAP2K4	GO:0000165;GO:0004672;GO:0005524;GO:0006468;GO:0009611;GO:0034393;GO:0071260;GO:2000672;GO:0004672;GO:0005524;GO:0006468;	K04430	mitogen-activated protein kinase kinase 4 [Source:HGNC Symbol;Acc:HGNC:6844]	sp|P45985|MP2K4_HUMAN Dual specificity mitogen-activated protein kinase kinase 4 OS=Homo sapiens OX=9606 GN=MAP2K4 PE=1 SV=1	veNOG07252	T	GO:0000165//MAPK cascade;GO:0006468//protein phosphorylation;GO:0009611//response to wounding;GO:0034393//positive regulation of smooth muscle cell apoptotic process;GO:0071260//cellular response to mechanical stimulus;GO:2000672//negative regulation of motor neuron apoptotic process;GO:0006468//protein phosphorylation;	-	GO:0004672//protein kinase activity;GO:0005524//ATP binding;GO:0004672//protein kinase activity;GO:0005524//ATP binding;	ko05418(Fluid shear stress and atherosclerosis);ko05417(Lipid and atherosclerosis);ko05208(Chemical carcinogenesis - reactive oxygen species);ko05169(Epstein-Barr virus infection);ko05167(Kaposi sarcoma-associated herpesvirus infection);ko05166(Human T-cell leukemia virus 1 infection);ko05161(Hepatitis B);ko05142(Chagas disease);ko05135(Yersinia infection);ko05132(Salmonella infection);ko05120(Ep…
MSTRG.100174	ENSBGRG00000018182	MSTRG.100174.1	90573	19[-]36890245-36891767	19[-]36982340-37302004	DNAH9	GO:0003341;GO:0003341;GO:0005524;GO:0005858;GO:0005930;GO:0007018;GO:0008569;GO:0030286;GO:0031514;GO:0036157;GO:0045505;GO:0051649;GO:0051959;GO:0090660;GO:0097729;GO:0097729;GO:0120135;GO:0120135;GO:0120197;GO:0003341;GO:0005524;GO:0005858;GO:0007018;GO:0008569;GO:0030286;GO:0045505;GO:0051959;	K10408	dynein axonemal heavy chain 9 [Source:HGNC Symbol;Acc:HGNC:2953]	sp|Q9NYC9|DYH9_HUMAN Dynein axonemal heavy chain 9 OS=Homo sapiens OX=9606 GN=DNAH9 PE=1 SV=3	veNOG05090	Z	GO:0003341//cilium movement;GO:0003341//cilium movement;GO:0007018//microtubule-based movement;GO:0051649//establishment of localization in cell;GO:0090660//cerebrospinal fluid circulation;GO:0120197//mucociliary clearance;GO:0003341//cilium movement;GO:0007018//microtubule-based movement;	GO:0005858//axonemal dynein complex;GO:0005930//axoneme;GO:0030286//dynein complex;GO:0031514//motile cilium;GO:0036157//outer dynein arm;GO:0097729//9+2 motile cilium;GO:0097729//9+2 motile cilium;GO:0120135//distal portion of axoneme;GO:0120135//distal portion of axoneme;GO:0005858//axonemal dynein complex;GO:0030286//dynein complex;	GO:0005524//ATP binding;GO:0008569//minus-end-directed microtubule motor activity;GO:0045505//dynein intermediate chain binding;GO:0051959//dynein light intermediate chain binding;GO:0005524//ATP binding;GO:0008569//minus-end-directed microtubule motor activity;GO:0045505//dynein intermediate chain binding;GO:0051959//dynein light intermediate chain binding;	ko05022(Pathways of neurodegeneration - multiple diseases);ko05016(Huntington disease);ko05014(Amyotrophic lateral sclerosis)
MSTRG.100174	ENSBGRG00000018061	MSTRG.100174.1	71642	19[-]36890245-36891767	19[+]36963409-36978973	ZNF18	GO:0006355;	K09229	zinc finger protein 18 [Source:HGNC Symbol;Acc:HGNC:12969]	sp|P17022|ZNF18_HUMAN Zinc finger protein 18 OS=Homo sapiens OX=9606 GN=ZNF18 PE=1 SV=2	veNOG11375	K	GO:0006355//regulation of transcription, DNA-templated;	-	-	-
MSTRG.100174	ENSBGRG00000017964	MSTRG.100174.1	0	19[-]36890245-36891767	19[-]36856379-36943042	MAP2K4	GO:0000165;GO:0004672;GO:0005524;GO:0006468;GO:0009611;GO:0034393;GO:0071260;GO:2000672;GO:0004672;GO:0005524;GO:0006468;	K04430	mitogen-activated protein kinase kinase 4 [Source:HGNC Symbol;Acc:HGNC:6844]	sp|P45985|MP2K4_HUMAN Dual specificity mitogen-activated protein kinase kinase 4 OS=Homo sapiens OX=9606 GN=MAP2K4 PE=1 SV=1	veNOG07252	T	GO:0000165//MAPK cascade;GO:0006468//protein phosphorylation;GO:0009611//response to wounding;GO:0034393//positive regulation of smooth muscle cell apoptotic process;GO:0071260//cellular response to mechanical stimulus;GO:2000672//negative regulation of motor neuron apoptotic process;GO:0006468//protein phosphorylation;	-	GO:0004672//protein kinase activity;GO:0005524//ATP binding;GO:0004672//protein kinase activity;GO:0005524//ATP binding;	ko05418(Fluid shear stress and atherosclerosis);ko05417(Lipid and atherosclerosis);ko05208(Chemical carcinogenesis - reactive oxygen species);ko05169(Epstein-Barr virus infection);ko05167(Kaposi sarcoma-associated herpesvirus infection);ko05166(Human T-cell leukemia virus 1 infection);ko05161(Hepatitis B);ko05142(Chagas disease);ko05135(Yersinia infection);ko05132(Salmonella infection);ko05120(Ep…
MSTRG.100176	ENSBGRG00000018182	MSTRG.100176.1	79689	19[-]36902292-36902651	19[-]36982340-37302004	DNAH9	GO:0003341;GO:0003341;GO:0005524;GO:0005858;GO:0005930;GO:0007018;GO:0008569;GO:0030286;GO:0031514;GO:0036157;GO:0045505;GO:0051649;GO:0051959;GO:0090660;GO:0097729;GO:0097729;GO:0120135;GO:0120135;GO:0120197;GO:0003341;GO:0005524;GO:0005858;GO:0007018;GO:0008569;GO:0030286;GO:0045505;GO:0051959;	K10408	dynein axonemal heavy chain 9 [Source:HGNC Symbol;Acc:HGNC:2953]	sp|Q9NYC9|DYH9_HUMAN Dynein axonemal heavy chain 9 OS=Homo sapiens OX=9606 GN=DNAH9 PE=1 SV=3	veNOG05090	Z	GO:0003341//cilium movement;GO:0003341//cilium movement;GO:0007018//microtubule-based movement;GO:0051649//establishment of localization in cell;GO:0090660//cerebrospinal fluid circulation;GO:0120197//mucociliary clearance;GO:0003341//cilium movement;GO:0007018//microtubule-based movement;	GO:0005858//axonemal dynein complex;GO:0005930//axoneme;GO:0030286//dynein complex;GO:0031514//motile cilium;GO:0036157//outer dynein arm;GO:0097729//9+2 motile cilium;GO:0097729//9+2 motile cilium;GO:0120135//distal portion of axoneme;GO:0120135//distal portion of axoneme;GO:0005858//axonemal dynein complex;GO:0030286//dynein complex;	GO:0005524//ATP binding;GO:0008569//minus-end-directed microtubule motor activity;GO:0045505//dynein intermediate chain binding;GO:0051959//dynein light intermediate chain binding;GO:0005524//ATP binding;GO:0008569//minus-end-directed microtubule motor activity;GO:0045505//dynein intermediate chain binding;GO:0051959//dynein light intermediate chain binding;	ko05022(Pathways of neurodegeneration - multiple diseases);ko05016(Huntington disease);ko05014(Amyotrophic lateral sclerosis)
MSTRG.100176	ENSBGRG00000018061	MSTRG.100176.1	60758	19[-]36902292-36902651	19[+]36963409-36978973	ZNF18	GO:0006355;	K09229	zinc finger protein 18 [Source:HGNC Symbol;Acc:HGNC:12969]	sp|P17022|ZNF18_HUMAN Zinc finger protein 18 OS=Homo sapiens OX=9606 GN=ZNF18 PE=1 SV=2	veNOG11375	K	GO:0006355//regulation of transcription, DNA-templated;	-	-	-
MSTRG.100176	ENSBGRG00000017964	MSTRG.100176.1	0	19[-]36902292-36902651	19[-]36856379-36943042	MAP2K4	GO:0000165;GO:0004672;GO:0005524;GO:0006468;GO:0009611;GO:0034393;GO:0071260;GO:2000672;GO:0004672;GO:0005524;GO:0006468;	K04430	mitogen-activated protein kinase kinase 4 [Source:HGNC Symbol;Acc:HGNC:6844]	sp|P45985|MP2K4_HUMAN Dual specificity mitogen-activated protein kinase kinase 4 OS=Homo sapiens OX=9606 GN=MAP2K4 PE=1 SV=1	veNOG07252	T	GO:0000165//MAPK cascade;GO:0006468//protein phosphorylation;GO:0009611//response to wounding;GO:0034393//positive regulation of smooth muscle cell apoptotic process;GO:0071260//cellular response to mechanical stimulus;GO:2000672//negative regulation of motor neuron apoptotic process;GO:0006468//protein phosphorylation;	-	GO:0004672//protein kinase activity;GO:0005524//ATP binding;GO:0004672//protein kinase activity;GO:0005524//ATP binding;	ko05418(Fluid shear stress and atherosclerosis);ko05417(Lipid and atherosclerosis);ko05208(Chemical carcinogenesis - reactive oxygen species);ko05169(Epstein-Barr virus infection);ko05167(Kaposi sarcoma-associated herpesvirus infection);ko05166(Human T-cell leukemia virus 1 infection);ko05161(Hepatitis B);ko05142(Chagas disease);ko05135(Yersinia infection);ko05132(Salmonella infection);ko05120(Ep…
MSTRG.100177	ENSBGRG00000018182	MSTRG.100177.1,MSTRG.100177.2	69478	19[-]36908727-36912862	19[-]36982340-37302004	DNAH9	GO:0003341;GO:0003341;GO:0005524;GO:0005858;GO:0005930;GO:0007018;GO:0008569;GO:0030286;GO:0031514;GO:0036157;GO:0045505;GO:0051649;GO:0051959;GO:0090660;GO:0097729;GO:0097729;GO:0120135;GO:0120135;GO:0120197;GO:0003341;GO:0005524;GO:0005858;GO:0007018;GO:0008569;GO:0030286;GO:0045505;GO:0051959;	K10408	dynein axonemal heavy chain 9 [Source:HGNC Symbol;Acc:HGNC:2953]	sp|Q9NYC9|DYH9_HUMAN Dynein axonemal heavy chain 9 OS=Homo sapiens OX=9606 GN=DNAH9 PE=1 SV=3	veNOG05090	Z	GO:0003341//cilium movement;GO:0003341//cilium movement;GO:0007018//microtubule-based movement;GO:0051649//establishment of localization in cell;GO:0090660//cerebrospinal fluid circulation;GO:0120197//mucociliary clearance;GO:0003341//cilium movement;GO:0007018//microtubule-based movement;	GO:0005858//axonemal dynein complex;GO:0005930//axoneme;GO:0030286//dynein complex;GO:0031514//motile cilium;GO:0036157//outer dynein arm;GO:0097729//9+2 motile cilium;GO:0097729//9+2 motile cilium;GO:0120135//distal portion of axoneme;GO:0120135//distal portion of axoneme;GO:0005858//axonemal dynein complex;GO:0030286//dynein complex;	GO:0005524//ATP binding;GO:0008569//minus-end-directed microtubule motor activity;GO:0045505//dynein intermediate chain binding;GO:0051959//dynein light intermediate chain binding;GO:0005524//ATP binding;GO:0008569//minus-end-directed microtubule motor activity;GO:0045505//dynein intermediate chain binding;GO:0051959//dynein light intermediate chain binding;	ko05022(Pathways of neurodegeneration - multiple diseases);ko05016(Huntington disease);ko05014(Amyotrophic lateral sclerosis)
MSTRG.100177	ENSBGRG00000018061	MSTRG.100177.1,MSTRG.100177.2	50547	19[-]36908727-36912862	19[+]36963409-36978973	ZNF18	GO:0006355;	K09229	zinc finger protein 18 [Source:HGNC Symbol;Acc:HGNC:12969]	sp|P17022|ZNF18_HUMAN Zinc finger protein 18 OS=Homo sapiens OX=9606 GN=ZNF18 PE=1 SV=2	veNOG11375	K	GO:0006355//regulation of transcription, DNA-templated;	-	-	-
MSTRG.100177	ENSBGRG00000017964	MSTRG.100177.1,MSTRG.100177.2	0	19[-]36908727-36912862	19[-]36856379-36943042	MAP2K4	GO:0000165;GO:0004672;GO:0005524;GO:0006468;GO:0009611;GO:0034393;GO:0071260;GO:2000672;GO:0004672;GO:0005524;GO:0006468;	K04430	mitogen-activated protein kinase kinase 4 [Source:HGNC Symbol;Acc:HGNC:6844]	sp|P45985|MP2K4_HUMAN Dual specificity mitogen-activated protein kinase kinase 4 OS=Homo sapiens OX=9606 GN=MAP2K4 PE=1 SV=1	veNOG07252	T	GO:0000165//MAPK cascade;GO:0006468//protein phosphorylation;GO:0009611//response to wounding;GO:0034393//positive regulation of smooth muscle cell apoptotic process;GO:0071260//cellular response to mechanical stimulus;GO:2000672//negative regulation of motor neuron apoptotic process;GO:0006468//protein phosphorylation;	-	GO:0004672//protein kinase activity;GO:0005524//ATP binding;GO:0004672//protein kinase activity;GO:0005524//ATP binding;	ko05418(Fluid shear stress and atherosclerosis);ko05417(Lipid and atherosclerosis);ko05208(Chemical carcinogenesis - reactive oxygen species);ko05169(Epstein-Barr virus infection);ko05167(Kaposi sarcoma-associated herpesvirus infection);ko05166(Human T-cell leukemia virus 1 infection);ko05161(Hepatitis B);ko05142(Chagas disease);ko05135(Yersinia infection);ko05132(Salmonella infection);ko05120(Ep…
MSTRG.100178	ENSBGRG00000018182	MSTRG.100178.1	71135	19[-]36910077-36911205	19[-]36982340-37302004	DNAH9	GO:0003341;GO:0003341;GO:0005524;GO:0005858;GO:0005930;GO:0007018;GO:0008569;GO:0030286;GO:0031514;GO:0036157;GO:0045505;GO:0051649;GO:0051959;GO:0090660;GO:0097729;GO:0097729;GO:0120135;GO:0120135;GO:0120197;GO:0003341;GO:0005524;GO:0005858;GO:0007018;GO:0008569;GO:0030286;GO:0045505;GO:0051959;	K10408	dynein axonemal heavy chain 9 [Source:HGNC Symbol;Acc:HGNC:2953]	sp|Q9NYC9|DYH9_HUMAN Dynein axonemal heavy chain 9 OS=Homo sapiens OX=9606 GN=DNAH9 PE=1 SV=3	veNOG05090	Z	GO:0003341//cilium movement;GO:0003341//cilium movement;GO:0007018//microtubule-based movement;GO:0051649//establishment of localization in cell;GO:0090660//cerebrospinal fluid circulation;GO:0120197//mucociliary clearance;GO:0003341//cilium movement;GO:0007018//microtubule-based movement;	GO:0005858//axonemal dynein complex;GO:0005930//axoneme;GO:0030286//dynein complex;GO:0031514//motile cilium;GO:0036157//outer dynein arm;GO:0097729//9+2 motile cilium;GO:0097729//9+2 motile cilium;GO:0120135//distal portion of axoneme;GO:0120135//distal portion of axoneme;GO:0005858//axonemal dynein complex;GO:0030286//dynein complex;	GO:0005524//ATP binding;GO:0008569//minus-end-directed microtubule motor activity;GO:0045505//dynein intermediate chain binding;GO:0051959//dynein light intermediate chain binding;GO:0005524//ATP binding;GO:0008569//minus-end-directed microtubule motor activity;GO:0045505//dynein intermediate chain binding;GO:0051959//dynein light intermediate chain binding;	ko05022(Pathways of neurodegeneration - multiple diseases);ko05016(Huntington disease);ko05014(Amyotrophic lateral sclerosis)
MSTRG.100178	ENSBGRG00000018061	MSTRG.100178.1	52204	19[-]36910077-36911205	19[+]36963409-36978973	ZNF18	GO:0006355;	K09229	zinc finger protein 18 [Source:HGNC Symbol;Acc:HGNC:12969]	sp|P17022|ZNF18_HUMAN Zinc finger protein 18 OS=Homo sapiens OX=9606 GN=ZNF18 PE=1 SV=2	veNOG11375	K	GO:0006355//regulation of transcription, DNA-templated;	-	-	-
MSTRG.100178	ENSBGRG00000017964	MSTRG.100178.1	0	19[-]36910077-36911205	19[-]36856379-36943042	MAP2K4	GO:0000165;GO:0004672;GO:0005524;GO:0006468;GO:0009611;GO:0034393;GO:0071260;GO:2000672;GO:0004672;GO:0005524;GO:0006468;	K04430	mitogen-activated protein kinase kinase 4 [Source:HGNC Symbol;Acc:HGNC:6844]	sp|P45985|MP2K4_HUMAN Dual specificity mitogen-activated protein kinase kinase 4 OS=Homo sapiens OX=9606 GN=MAP2K4 PE=1 SV=1	veNOG07252	T	GO:0000165//MAPK cascade;GO:0006468//protein phosphorylation;GO:0009611//response to wounding;GO:0034393//positive regulation of smooth muscle cell apoptotic process;GO:0071260//cellular response to mechanical stimulus;GO:2000672//negative regulation of motor neuron apoptotic process;GO:0006468//protein phosphorylation;	-	GO:0004672//protein kinase activity;GO:0005524//ATP binding;GO:0004672//protein kinase activity;GO:0005524//ATP binding;	ko05418(Fluid shear stress and atherosclerosis);ko05417(Lipid and atherosclerosis);ko05208(Chemical carcinogenesis - reactive oxygen species);ko05169(Epstein-Barr virus infection);ko05167(Kaposi sarcoma-associated herpesvirus infection);ko05166(Human T-cell leukemia virus 1 infection);ko05161(Hepatitis B);ko05142(Chagas disease);ko05135(Yersinia infection);ko05132(Salmonella infection);ko05120(Ep…
MSTRG.100179	ENSBGRG00000018182	MSTRG.100179.4,MSTRG.100179.2,MSTRG.100179.3	58616	19[-]36919956-36923724	19[-]36982340-37302004	DNAH9	GO:0003341;GO:0003341;GO:0005524;GO:0005858;GO:0005930;GO:0007018;GO:0008569;GO:0030286;GO:0031514;GO:0036157;GO:0045505;GO:0051649;GO:0051959;GO:0090660;GO:0097729;GO:0097729;GO:0120135;GO:0120135;GO:0120197;GO:0003341;GO:0005524;GO:0005858;GO:0007018;GO:0008569;GO:0030286;GO:0045505;GO:0051959;	K10408	dynein axonemal heavy chain 9 [Source:HGNC Symbol;Acc:HGNC:2953]	sp|Q9NYC9|DYH9_HUMAN Dynein axonemal heavy chain 9 OS=Homo sapiens OX=9606 GN=DNAH9 PE=1 SV=3	veNOG05090	Z	GO:0003341//cilium movement;GO:0003341//cilium movement;GO:0007018//microtubule-based movement;GO:0051649//establishment of localization in cell;GO:0090660//cerebrospinal fluid circulation;GO:0120197//mucociliary clearance;GO:0003341//cilium movement;GO:0007018//microtubule-based movement;	GO:0005858//axonemal dynein complex;GO:0005930//axoneme;GO:0030286//dynein complex;GO:0031514//motile cilium;GO:0036157//outer dynein arm;GO:0097729//9+2 motile cilium;GO:0097729//9+2 motile cilium;GO:0120135//distal portion of axoneme;GO:0120135//distal portion of axoneme;GO:0005858//axonemal dynein complex;GO:0030286//dynein complex;	GO:0005524//ATP binding;GO:0008569//minus-end-directed microtubule motor activity;GO:0045505//dynein intermediate chain binding;GO:0051959//dynein light intermediate chain binding;GO:0005524//ATP binding;GO:0008569//minus-end-directed microtubule motor activity;GO:0045505//dynein intermediate chain binding;GO:0051959//dynein light intermediate chain binding;	ko05022(Pathways of neurodegeneration - multiple diseases);ko05016(Huntington disease);ko05014(Amyotrophic lateral sclerosis)
MSTRG.100179	ENSBGRG00000018061	MSTRG.100179.4,MSTRG.100179.2,MSTRG.100179.3	39685	19[-]36919956-36923724	19[+]36963409-36978973	ZNF18	GO:0006355;	K09229	zinc finger protein 18 [Source:HGNC Symbol;Acc:HGNC:12969]	sp|P17022|ZNF18_HUMAN Zinc finger protein 18 OS=Homo sapiens OX=9606 GN=ZNF18 PE=1 SV=2	veNOG11375	K	GO:0006355//regulation of transcription, DNA-templated;	-	-	-
MSTRG.100179	ENSBGRG00000017964	MSTRG.100179.4,MSTRG.100179.2,MSTRG.100179.3	0	19[-]36919956-36923724	19[-]36856379-36943042	MAP2K4	GO:0000165;GO:0004672;GO:0005524;GO:0006468;GO:0009611;GO:0034393;GO:0071260;GO:2000672;GO:0004672;GO:0005524;GO:0006468;	K04430	mitogen-activated protein kinase kinase 4 [Source:HGNC Symbol;Acc:HGNC:6844]	sp|P45985|MP2K4_HUMAN Dual specificity mitogen-activated protein kinase kinase 4 OS=Homo sapiens OX=9606 GN=MAP2K4 PE=1 SV=1	veNOG07252	T	GO:0000165//MAPK cascade;GO:0006468//protein phosphorylation;GO:0009611//response to wounding;GO:0034393//positive regulation of smooth muscle cell apoptotic process;GO:0071260//cellular response to mechanical stimulus;GO:2000672//negative regulation of motor neuron apoptotic process;GO:0006468//protein phosphorylation;	-	GO:0004672//protein kinase activity;GO:0005524//ATP binding;GO:0004672//protein kinase activity;GO:0005524//ATP binding;	ko05418(Fluid shear stress and atherosclerosis);ko05417(Lipid and atherosclerosis);ko05208(Chemical carcinogenesis - reactive oxygen species);ko05169(Epstein-Barr virus infection);ko05167(Kaposi sarcoma-associated herpesvirus infection);ko05166(Human T-cell leukemia virus 1 infection);ko05161(Hepatitis B);ko05142(Chagas disease);ko05135(Yersinia infection);ko05132(Salmonella infection);ko05120(Ep…
MSTRG.10018	ENSBGRG00000015425	MSTRG.10018.1	81501	1[-]118560035-118561081	1[-]118642582-119113781	RSRC1	GO:0000380;GO:0000380;GO:0000398;GO:0000398;GO:0005634;GO:0005737;GO:0006468;GO:0006913;GO:0008380;GO:0016607;GO:0046677;GO:0000380;GO:0000398;GO:0000380;GO:0000398;GO:0000380;GO:0000398;	K24594	arginine and serine rich coiled-coil 1 [Source:HGNC Symbol;Acc:HGNC:24152]	sp|Q2T9Y0|RSRC1_BOVIN Serine/Arginine-related protein 53 OS=Bos taurus OX=9913 GN=RSRC1 PE=2 SV=1	veNOG18112	J	GO:0000380//alternative mRNA splicing, via spliceosome;GO:0000380//alternative mRNA splicing, via spliceosome;GO:0000398//mRNA splicing, via spliceosome;GO:0000398//mRNA splicing, via spliceosome;GO:0006468//protein phosphorylation;GO:0006913//nucleocytoplasmic transport;GO:0008380//RNA splicing;GO:0046677//response to antibiotic;GO:0000380//alternative mRNA splicing, via spliceosome;GO:0000398//…	GO:0005634//nucleus;GO:0005737//cytoplasm;GO:0016607//nuclear speck;	-	-
MSTRG.10018	ENSBGRG00000014790	MSTRG.10018.1	26248	1[-]118560035-118561081	1[+]118526670-118533787	LXN	GO:0008191;GO:0050965;	K23594	latexin [Source:HGNC Symbol;Acc:HGNC:13347]	sp|P70202|LXN_MOUSE Latexin OS=Mus musculus OX=10090 GN=Lxn PE=1 SV=2	veNOG12211	R	GO:0050965//detection of temperature stimulus involved in sensory perception of pain;	-	GO:0008191//metalloendopeptidase inhibitor activity;	-
MSTRG.10018	ENSBGRG00000014425	MSTRG.10018.1	52086	1[-]118560035-118561081	1[+]118460976-118507949	RARRES1	GO:0008285;	K23595	retinoic acid receptor responder 1 [Source:HGNC Symbol;Acc:HGNC:9867]	sp|P49788|TIG1_HUMAN Retinoic acid receptor responder protein 1 OS=Homo sapiens OX=9606 GN=RARRES1 PE=1 SV=2	veNOG09710	T	GO:0008285//negative regulation of cell population proliferation;	-	-	-
MSTRG.10018	ENSBGRG00000014908	MSTRG.10018.1	15974	1[-]118560035-118561081	1[-]118577055-118612617	MLF1	-	K15622	myeloid leukemia factor 1 [Source:HGNC Symbol;Acc:HGNC:7125]	sp|Q32KY3|MLF1_BOVIN Myeloid leukemia factor 1 OS=Bos taurus OX=9913 GN=MLF1 PE=2 SV=1	veNOG16002	K	-	-	-	ko05202(Transcriptional misregulation in cancer)
MSTRG.10018	ENSBGRG00000014469	MSTRG.10018.1	0	1[-]118560035-118561081	1[-]118512012-118569745	GFM1	GO:0003746;GO:0003746;GO:0003924;GO:0003924;GO:0005525;GO:0006414;GO:0070125;	K02355	G elongation factor mitochondrial 1 [Source:HGNC Symbol;Acc:HGNC:13780]	sp|Q07803|EFGM_RAT Elongation factor G, mitochondrial OS=Rattus norvegicus OX=10116 GN=Gfm1 PE=1 SV=2	veNOG12485	J	GO:0006414//translational elongation;GO:0070125//mitochondrial translational elongation;	-	GO:0003746//translation elongation factor activity;GO:0003746//translation elongation factor activity;GO:0003924//GTPase activity;GO:0003924//GTPase activity;GO:0005525//GTP binding;	-
MSTRG.100180	ENSBGRG00000018182	MSTRG.100180.1	55369	19[-]36926394-36926971	19[-]36982340-37302004	DNAH9	GO:0003341;GO:0003341;GO:0005524;GO:0005858;GO:0005930;GO:0007018;GO:0008569;GO:0030286;GO:0031514;GO:0036157;GO:0045505;GO:0051649;GO:0051959;GO:0090660;GO:0097729;GO:0097729;GO:0120135;GO:0120135;GO:0120197;GO:0003341;GO:0005524;GO:0005858;GO:0007018;GO:0008569;GO:0030286;GO:0045505;GO:0051959;	K10408	dynein axonemal heavy chain 9 [Source:HGNC Symbol;Acc:HGNC:2953]	sp|Q9NYC9|DYH9_HUMAN Dynein axonemal heavy chain 9 OS=Homo sapiens OX=9606 GN=DNAH9 PE=1 SV=3	veNOG05090	Z	GO:0003341//cilium movement;GO:0003341//cilium movement;GO:0007018//microtubule-based movement;GO:0051649//establishment of localization in cell;GO:0090660//cerebrospinal fluid circulation;GO:0120197//mucociliary clearance;GO:0003341//cilium movement;GO:0007018//microtubule-based movement;	GO:0005858//axonemal dynein complex;GO:0005930//axoneme;GO:0030286//dynein complex;GO:0031514//motile cilium;GO:0036157//outer dynein arm;GO:0097729//9+2 motile cilium;GO:0097729//9+2 motile cilium;GO:0120135//distal portion of axoneme;GO:0120135//distal portion of axoneme;GO:0005858//axonemal dynein complex;GO:0030286//dynein complex;	GO:0005524//ATP binding;GO:0008569//minus-end-directed microtubule motor activity;GO:0045505//dynein intermediate chain binding;GO:0051959//dynein light intermediate chain binding;GO:0005524//ATP binding;GO:0008569//minus-end-directed microtubule motor activity;GO:0045505//dynein intermediate chain binding;GO:0051959//dynein light intermediate chain binding;	ko05022(Pathways of neurodegeneration - multiple diseases);ko05016(Huntington disease);ko05014(Amyotrophic lateral sclerosis)
MSTRG.100180	ENSBGRG00000018061	MSTRG.100180.1	36438	19[-]36926394-36926971	19[+]36963409-36978973	ZNF18	GO:0006355;	K09229	zinc finger protein 18 [Source:HGNC Symbol;Acc:HGNC:12969]	sp|P17022|ZNF18_HUMAN Zinc finger protein 18 OS=Homo sapiens OX=9606 GN=ZNF18 PE=1 SV=2	veNOG11375	K	GO:0006355//regulation of transcription, DNA-templated;	-	-	-
MSTRG.100180	ENSBGRG00000017964	MSTRG.100180.1	0	19[-]36926394-36926971	19[-]36856379-36943042	MAP2K4	GO:0000165;GO:0004672;GO:0005524;GO:0006468;GO:0009611;GO:0034393;GO:0071260;GO:2000672;GO:0004672;GO:0005524;GO:0006468;	K04430	mitogen-activated protein kinase kinase 4 [Source:HGNC Symbol;Acc:HGNC:6844]	sp|P45985|MP2K4_HUMAN Dual specificity mitogen-activated protein kinase kinase 4 OS=Homo sapiens OX=9606 GN=MAP2K4 PE=1 SV=1	veNOG07252	T	GO:0000165//MAPK cascade;GO:0006468//protein phosphorylation;GO:0009611//response to wounding;GO:0034393//positive regulation of smooth muscle cell apoptotic process;GO:0071260//cellular response to mechanical stimulus;GO:2000672//negative regulation of motor neuron apoptotic process;GO:0006468//protein phosphorylation;	-	GO:0004672//protein kinase activity;GO:0005524//ATP binding;GO:0004672//protein kinase activity;GO:0005524//ATP binding;	ko05418(Fluid shear stress and atherosclerosis);ko05417(Lipid and atherosclerosis);ko05208(Chemical carcinogenesis - reactive oxygen species);ko05169(Epstein-Barr virus infection);ko05167(Kaposi sarcoma-associated herpesvirus infection);ko05166(Human T-cell leukemia virus 1 infection);ko05161(Hepatitis B);ko05142(Chagas disease);ko05135(Yersinia infection);ko05132(Salmonella infection);ko05120(Ep…
MSTRG.100181	ENSBGRG00000018182	MSTRG.100181.1,MSTRG.100181.3,MSTRG.100181.2	47197	19[-]36932786-36935143	19[-]36982340-37302004	DNAH9	GO:0003341;GO:0003341;GO:0005524;GO:0005858;GO:0005930;GO:0007018;GO:0008569;GO:0030286;GO:0031514;GO:0036157;GO:0045505;GO:0051649;GO:0051959;GO:0090660;GO:0097729;GO:0097729;GO:0120135;GO:0120135;GO:0120197;GO:0003341;GO:0005524;GO:0005858;GO:0007018;GO:0008569;GO:0030286;GO:0045505;GO:0051959;	K10408	dynein axonemal heavy chain 9 [Source:HGNC Symbol;Acc:HGNC:2953]	sp|Q9NYC9|DYH9_HUMAN Dynein axonemal heavy chain 9 OS=Homo sapiens OX=9606 GN=DNAH9 PE=1 SV=3	veNOG05090	Z	GO:0003341//cilium movement;GO:0003341//cilium movement;GO:0007018//microtubule-based movement;GO:0051649//establishment of localization in cell;GO:0090660//cerebrospinal fluid circulation;GO:0120197//mucociliary clearance;GO:0003341//cilium movement;GO:0007018//microtubule-based movement;	GO:0005858//axonemal dynein complex;GO:0005930//axoneme;GO:0030286//dynein complex;GO:0031514//motile cilium;GO:0036157//outer dynein arm;GO:0097729//9+2 motile cilium;GO:0097729//9+2 motile cilium;GO:0120135//distal portion of axoneme;GO:0120135//distal portion of axoneme;GO:0005858//axonemal dynein complex;GO:0030286//dynein complex;	GO:0005524//ATP binding;GO:0008569//minus-end-directed microtubule motor activity;GO:0045505//dynein intermediate chain binding;GO:0051959//dynein light intermediate chain binding;GO:0005524//ATP binding;GO:0008569//minus-end-directed microtubule motor activity;GO:0045505//dynein intermediate chain binding;GO:0051959//dynein light intermediate chain binding;	ko05022(Pathways of neurodegeneration - multiple diseases);ko05016(Huntington disease);ko05014(Amyotrophic lateral sclerosis)
MSTRG.100181	ENSBGRG00000018061	MSTRG.100181.1,MSTRG.100181.3,MSTRG.100181.2	28266	19[-]36932786-36935143	19[+]36963409-36978973	ZNF18	GO:0006355;	K09229	zinc finger protein 18 [Source:HGNC Symbol;Acc:HGNC:12969]	sp|P17022|ZNF18_HUMAN Zinc finger protein 18 OS=Homo sapiens OX=9606 GN=ZNF18 PE=1 SV=2	veNOG11375	K	GO:0006355//regulation of transcription, DNA-templated;	-	-	-
MSTRG.100181	ENSBGRG00000017964	MSTRG.100181.1,MSTRG.100181.3,MSTRG.100181.2	0	19[-]36932786-36935143	19[-]36856379-36943042	MAP2K4	GO:0000165;GO:0004672;GO:0005524;GO:0006468;GO:0009611;GO:0034393;GO:0071260;GO:2000672;GO:0004672;GO:0005524;GO:0006468;	K04430	mitogen-activated protein kinase kinase 4 [Source:HGNC Symbol;Acc:HGNC:6844]	sp|P45985|MP2K4_HUMAN Dual specificity mitogen-activated protein kinase kinase 4 OS=Homo sapiens OX=9606 GN=MAP2K4 PE=1 SV=1	veNOG07252	T	GO:0000165//MAPK cascade;GO:0006468//protein phosphorylation;GO:0009611//response to wounding;GO:0034393//positive regulation of smooth muscle cell apoptotic process;GO:0071260//cellular response to mechanical stimulus;GO:2000672//negative regulation of motor neuron apoptotic process;GO:0006468//protein phosphorylation;	-	GO:0004672//protein kinase activity;GO:0005524//ATP binding;GO:0004672//protein kinase activity;GO:0005524//ATP binding;	ko05418(Fluid shear stress and atherosclerosis);ko05417(Lipid and atherosclerosis);ko05208(Chemical carcinogenesis - reactive oxygen species);ko05169(Epstein-Barr virus infection);ko05167(Kaposi sarcoma-associated herpesvirus infection);ko05166(Human T-cell leukemia virus 1 infection);ko05161(Hepatitis B);ko05142(Chagas disease);ko05135(Yersinia infection);ko05132(Salmonella infection);ko05120(Ep…
MSTRG.100182	ENSBGRG00000018182	MSTRG.100182.1	42225	19[-]36938572-36940115	19[-]36982340-37302004	DNAH9	GO:0003341;GO:0003341;GO:0005524;GO:0005858;GO:0005930;GO:0007018;GO:0008569;GO:0030286;GO:0031514;GO:0036157;GO:0045505;GO:0051649;GO:0051959;GO:0090660;GO:0097729;GO:0097729;GO:0120135;GO:0120135;GO:0120197;GO:0003341;GO:0005524;GO:0005858;GO:0007018;GO:0008569;GO:0030286;GO:0045505;GO:0051959;	K10408	dynein axonemal heavy chain 9 [Source:HGNC Symbol;Acc:HGNC:2953]	sp|Q9NYC9|DYH9_HUMAN Dynein axonemal heavy chain 9 OS=Homo sapiens OX=9606 GN=DNAH9 PE=1 SV=3	veNOG05090	Z	GO:0003341//cilium movement;GO:0003341//cilium movement;GO:0007018//microtubule-based movement;GO:0051649//establishment of localization in cell;GO:0090660//cerebrospinal fluid circulation;GO:0120197//mucociliary clearance;GO:0003341//cilium movement;GO:0007018//microtubule-based movement;	GO:0005858//axonemal dynein complex;GO:0005930//axoneme;GO:0030286//dynein complex;GO:0031514//motile cilium;GO:0036157//outer dynein arm;GO:0097729//9+2 motile cilium;GO:0097729//9+2 motile cilium;GO:0120135//distal portion of axoneme;GO:0120135//distal portion of axoneme;GO:0005858//axonemal dynein complex;GO:0030286//dynein complex;	GO:0005524//ATP binding;GO:0008569//minus-end-directed microtubule motor activity;GO:0045505//dynein intermediate chain binding;GO:0051959//dynein light intermediate chain binding;GO:0005524//ATP binding;GO:0008569//minus-end-directed microtubule motor activity;GO:0045505//dynein intermediate chain binding;GO:0051959//dynein light intermediate chain binding;	ko05022(Pathways of neurodegeneration - multiple diseases);ko05016(Huntington disease);ko05014(Amyotrophic lateral sclerosis)
MSTRG.100182	ENSBGRG00000018061	MSTRG.100182.1	23294	19[-]36938572-36940115	19[+]36963409-36978973	ZNF18	GO:0006355;	K09229	zinc finger protein 18 [Source:HGNC Symbol;Acc:HGNC:12969]	sp|P17022|ZNF18_HUMAN Zinc finger protein 18 OS=Homo sapiens OX=9606 GN=ZNF18 PE=1 SV=2	veNOG11375	K	GO:0006355//regulation of transcription, DNA-templated;	-	-	-
MSTRG.100182	ENSBGRG00000017964	MSTRG.100182.1	0	19[-]36938572-36940115	19[-]36856379-36943042	MAP2K4	GO:0000165;GO:0004672;GO:0005524;GO:0006468;GO:0009611;GO:0034393;GO:0071260;GO:2000672;GO:0004672;GO:0005524;GO:0006468;	K04430	mitogen-activated protein kinase kinase 4 [Source:HGNC Symbol;Acc:HGNC:6844]	sp|P45985|MP2K4_HUMAN Dual specificity mitogen-activated protein kinase kinase 4 OS=Homo sapiens OX=9606 GN=MAP2K4 PE=1 SV=1	veNOG07252	T	GO:0000165//MAPK cascade;GO:0006468//protein phosphorylation;GO:0009611//response to wounding;GO:0034393//positive regulation of smooth muscle cell apoptotic process;GO:0071260//cellular response to mechanical stimulus;GO:2000672//negative regulation of motor neuron apoptotic process;GO:0006468//protein phosphorylation;	-	GO:0004672//protein kinase activity;GO:0005524//ATP binding;GO:0004672//protein kinase activity;GO:0005524//ATP binding;	ko05418(Fluid shear stress and atherosclerosis);ko05417(Lipid and atherosclerosis);ko05208(Chemical carcinogenesis - reactive oxygen species);ko05169(Epstein-Barr virus infection);ko05167(Kaposi sarcoma-associated herpesvirus infection);ko05166(Human T-cell leukemia virus 1 infection);ko05161(Hepatitis B);ko05142(Chagas disease);ko05135(Yersinia infection);ko05132(Salmonella infection);ko05120(Ep…
MSTRG.100185	ENSBGRG00000018182	MSTRG.100185.4	13106	19[+]36967750-36969234	19[-]36982340-37302004	DNAH9	GO:0003341;GO:0003341;GO:0005524;GO:0005858;GO:0005930;GO:0007018;GO:0008569;GO:0030286;GO:0031514;GO:0036157;GO:0045505;GO:0051649;GO:0051959;GO:0090660;GO:0097729;GO:0097729;GO:0120135;GO:0120135;GO:0120197;GO:0003341;GO:0005524;GO:0005858;GO:0007018;GO:0008569;GO:0030286;GO:0045505;GO:0051959;	K10408	dynein axonemal heavy chain 9 [Source:HGNC Symbol;Acc:HGNC:2953]	sp|Q9NYC9|DYH9_HUMAN Dynein axonemal heavy chain 9 OS=Homo sapiens OX=9606 GN=DNAH9 PE=1 SV=3	veNOG05090	Z	GO:0003341//cilium movement;GO:0003341//cilium movement;GO:0007018//microtubule-based movement;GO:0051649//establishment of localization in cell;GO:0090660//cerebrospinal fluid circulation;GO:0120197//mucociliary clearance;GO:0003341//cilium movement;GO:0007018//microtubule-based movement;	GO:0005858//axonemal dynein complex;GO:0005930//axoneme;GO:0030286//dynein complex;GO:0031514//motile cilium;GO:0036157//outer dynein arm;GO:0097729//9+2 motile cilium;GO:0097729//9+2 motile cilium;GO:0120135//distal portion of axoneme;GO:0120135//distal portion of axoneme;GO:0005858//axonemal dynein complex;GO:0030286//dynein complex;	GO:0005524//ATP binding;GO:0008569//minus-end-directed microtubule motor activity;GO:0045505//dynein intermediate chain binding;GO:0051959//dynein light intermediate chain binding;GO:0005524//ATP binding;GO:0008569//minus-end-directed microtubule motor activity;GO:0045505//dynein intermediate chain binding;GO:0051959//dynein light intermediate chain binding;	ko05022(Pathways of neurodegeneration - multiple diseases);ko05016(Huntington disease);ko05014(Amyotrophic lateral sclerosis)
MSTRG.100185	ENSBGRG00000018061	MSTRG.100185.4	0	19[+]36967750-36969234	19[+]36963409-36978973	ZNF18	GO:0006355;	K09229	zinc finger protein 18 [Source:HGNC Symbol;Acc:HGNC:12969]	sp|P17022|ZNF18_HUMAN Zinc finger protein 18 OS=Homo sapiens OX=9606 GN=ZNF18 PE=1 SV=2	veNOG11375	K	GO:0006355//regulation of transcription, DNA-templated;	-	-	-
MSTRG.100185	ENSBGRG00000017964	MSTRG.100185.4	24708	19[+]36967750-36969234	19[-]36856379-36943042	MAP2K4	GO:0000165;GO:0004672;GO:0005524;GO:0006468;GO:0009611;GO:0034393;GO:0071260;GO:2000672;GO:0004672;GO:0005524;GO:0006468;	K04430	mitogen-activated protein kinase kinase 4 [Source:HGNC Symbol;Acc:HGNC:6844]	sp|P45985|MP2K4_HUMAN Dual specificity mitogen-activated protein kinase kinase 4 OS=Homo sapiens OX=9606 GN=MAP2K4 PE=1 SV=1	veNOG07252	T	GO:0000165//MAPK cascade;GO:0006468//protein phosphorylation;GO:0009611//response to wounding;GO:0034393//positive regulation of smooth muscle cell apoptotic process;GO:0071260//cellular response to mechanical stimulus;GO:2000672//negative regulation of motor neuron apoptotic process;GO:0006468//protein phosphorylation;	-	GO:0004672//protein kinase activity;GO:0005524//ATP binding;GO:0004672//protein kinase activity;GO:0005524//ATP binding;	ko05418(Fluid shear stress and atherosclerosis);ko05417(Lipid and atherosclerosis);ko05208(Chemical carcinogenesis - reactive oxygen species);ko05169(Epstein-Barr virus infection);ko05167(Kaposi sarcoma-associated herpesvirus infection);ko05166(Human T-cell leukemia virus 1 infection);ko05161(Hepatitis B);ko05142(Chagas disease);ko05135(Yersinia infection);ko05132(Salmonella infection);ko05120(Ep…
MSTRG.100186	ENSBGRG00000018182	MSTRG.100186.1	13357	19[+]36967539-36968983	19[-]36982340-37302004	DNAH9	GO:0003341;GO:0003341;GO:0005524;GO:0005858;GO:0005930;GO:0007018;GO:0008569;GO:0030286;GO:0031514;GO:0036157;GO:0045505;GO:0051649;GO:0051959;GO:0090660;GO:0097729;GO:0097729;GO:0120135;GO:0120135;GO:0120197;GO:0003341;GO:0005524;GO:0005858;GO:0007018;GO:0008569;GO:0030286;GO:0045505;GO:0051959;	K10408	dynein axonemal heavy chain 9 [Source:HGNC Symbol;Acc:HGNC:2953]	sp|Q9NYC9|DYH9_HUMAN Dynein axonemal heavy chain 9 OS=Homo sapiens OX=9606 GN=DNAH9 PE=1 SV=3	veNOG05090	Z	GO:0003341//cilium movement;GO:0003341//cilium movement;GO:0007018//microtubule-based movement;GO:0051649//establishment of localization in cell;GO:0090660//cerebrospinal fluid circulation;GO:0120197//mucociliary clearance;GO:0003341//cilium movement;GO:0007018//microtubule-based movement;	GO:0005858//axonemal dynein complex;GO:0005930//axoneme;GO:0030286//dynein complex;GO:0031514//motile cilium;GO:0036157//outer dynein arm;GO:0097729//9+2 motile cilium;GO:0097729//9+2 motile cilium;GO:0120135//distal portion of axoneme;GO:0120135//distal portion of axoneme;GO:0005858//axonemal dynein complex;GO:0030286//dynein complex;	GO:0005524//ATP binding;GO:0008569//minus-end-directed microtubule motor activity;GO:0045505//dynein intermediate chain binding;GO:0051959//dynein light intermediate chain binding;GO:0005524//ATP binding;GO:0008569//minus-end-directed microtubule motor activity;GO:0045505//dynein intermediate chain binding;GO:0051959//dynein light intermediate chain binding;	ko05022(Pathways of neurodegeneration - multiple diseases);ko05016(Huntington disease);ko05014(Amyotrophic lateral sclerosis)
MSTRG.100186	ENSBGRG00000018061	MSTRG.100186.1	0	19[+]36967539-36968983	19[+]36963409-36978973	ZNF18	GO:0006355;	K09229	zinc finger protein 18 [Source:HGNC Symbol;Acc:HGNC:12969]	sp|P17022|ZNF18_HUMAN Zinc finger protein 18 OS=Homo sapiens OX=9606 GN=ZNF18 PE=1 SV=2	veNOG11375	K	GO:0006355//regulation of transcription, DNA-templated;	-	-	-
MSTRG.100186	ENSBGRG00000017964	MSTRG.100186.1	24497	19[+]36967539-36968983	19[-]36856379-36943042	MAP2K4	GO:0000165;GO:0004672;GO:0005524;GO:0006468;GO:0009611;GO:0034393;GO:0071260;GO:2000672;GO:0004672;GO:0005524;GO:0006468;	K04430	mitogen-activated protein kinase kinase 4 [Source:HGNC Symbol;Acc:HGNC:6844]	sp|P45985|MP2K4_HUMAN Dual specificity mitogen-activated protein kinase kinase 4 OS=Homo sapiens OX=9606 GN=MAP2K4 PE=1 SV=1	veNOG07252	T	GO:0000165//MAPK cascade;GO:0006468//protein phosphorylation;GO:0009611//response to wounding;GO:0034393//positive regulation of smooth muscle cell apoptotic process;GO:0071260//cellular response to mechanical stimulus;GO:2000672//negative regulation of motor neuron apoptotic process;GO:0006468//protein phosphorylation;	-	GO:0004672//protein kinase activity;GO:0005524//ATP binding;GO:0004672//protein kinase activity;GO:0005524//ATP binding;	ko05418(Fluid shear stress and atherosclerosis);ko05417(Lipid and atherosclerosis);ko05208(Chemical carcinogenesis - reactive oxygen species);ko05169(Epstein-Barr virus infection);ko05167(Kaposi sarcoma-associated herpesvirus infection);ko05166(Human T-cell leukemia virus 1 infection);ko05161(Hepatitis B);ko05142(Chagas disease);ko05135(Yersinia infection);ko05132(Salmonella infection);ko05120(Ep…
MSTRG.10019	ENSBGRG00000015425	MSTRG.10019.1	81162	1[-]118560231-118561420	1[-]118642582-119113781	RSRC1	GO:0000380;GO:0000380;GO:0000398;GO:0000398;GO:0005634;GO:0005737;GO:0006468;GO:0006913;GO:0008380;GO:0016607;GO:0046677;GO:0000380;GO:0000398;GO:0000380;GO:0000398;GO:0000380;GO:0000398;	K24594	arginine and serine rich coiled-coil 1 [Source:HGNC Symbol;Acc:HGNC:24152]	sp|Q2T9Y0|RSRC1_BOVIN Serine/Arginine-related protein 53 OS=Bos taurus OX=9913 GN=RSRC1 PE=2 SV=1	veNOG18112	J	GO:0000380//alternative mRNA splicing, via spliceosome;GO:0000380//alternative mRNA splicing, via spliceosome;GO:0000398//mRNA splicing, via spliceosome;GO:0000398//mRNA splicing, via spliceosome;GO:0006468//protein phosphorylation;GO:0006913//nucleocytoplasmic transport;GO:0008380//RNA splicing;GO:0046677//response to antibiotic;GO:0000380//alternative mRNA splicing, via spliceosome;GO:0000398//…	GO:0005634//nucleus;GO:0005737//cytoplasm;GO:0016607//nuclear speck;	-	-
MSTRG.10019	ENSBGRG00000014790	MSTRG.10019.1	26444	1[-]118560231-118561420	1[+]118526670-118533787	LXN	GO:0008191;GO:0050965;	K23594	latexin [Source:HGNC Symbol;Acc:HGNC:13347]	sp|P70202|LXN_MOUSE Latexin OS=Mus musculus OX=10090 GN=Lxn PE=1 SV=2	veNOG12211	R	GO:0050965//detection of temperature stimulus involved in sensory perception of pain;	-	GO:0008191//metalloendopeptidase inhibitor activity;	-
MSTRG.10019	ENSBGRG00000014425	MSTRG.10019.1	52282	1[-]118560231-118561420	1[+]118460976-118507949	RARRES1	GO:0008285;	K23595	retinoic acid receptor responder 1 [Source:HGNC Symbol;Acc:HGNC:9867]	sp|P49788|TIG1_HUMAN Retinoic acid receptor responder protein 1 OS=Homo sapiens OX=9606 GN=RARRES1 PE=1 SV=2	veNOG09710	T	GO:0008285//negative regulation of cell population proliferation;	-	-	-
MSTRG.10019	ENSBGRG00000014908	MSTRG.10019.1	15635	1[-]118560231-118561420	1[-]118577055-118612617	MLF1	-	K15622	myeloid leukemia factor 1 [Source:HGNC Symbol;Acc:HGNC:7125]	sp|Q32KY3|MLF1_BOVIN Myeloid leukemia factor 1 OS=Bos taurus OX=9913 GN=MLF1 PE=2 SV=1	veNOG16002	K	-	-	-	ko05202(Transcriptional misregulation in cancer)
MSTRG.10019	ENSBGRG00000014469	MSTRG.10019.1	0	1[-]118560231-118561420	1[-]118512012-118569745	GFM1	GO:0003746;GO:0003746;GO:0003924;GO:0003924;GO:0005525;GO:0006414;GO:0070125;	K02355	G elongation factor mitochondrial 1 [Source:HGNC Symbol;Acc:HGNC:13780]	sp|Q07803|EFGM_RAT Elongation factor G, mitochondrial OS=Rattus norvegicus OX=10116 GN=Gfm1 PE=1 SV=2	veNOG12485	J	GO:0006414//translational elongation;GO:0070125//mitochondrial translational elongation;	-	GO:0003746//translation elongation factor activity;GO:0003746//translation elongation factor activity;GO:0003924//GTPase activity;GO:0003924//GTPase activity;GO:0005525//GTP binding;	-
MSTRG.10021	ENSBGRG00000015425	MSTRG.10021.1	67512	1[-]118572512-118575070	1[-]118642582-119113781	RSRC1	GO:0000380;GO:0000380;GO:0000398;GO:0000398;GO:0005634;GO:0005737;GO:0006468;GO:0006913;GO:0008380;GO:0016607;GO:0046677;GO:0000380;GO:0000398;GO:0000380;GO:0000398;GO:0000380;GO:0000398;	K24594	arginine and serine rich coiled-coil 1 [Source:HGNC Symbol;Acc:HGNC:24152]	sp|Q2T9Y0|RSRC1_BOVIN Serine/Arginine-related protein 53 OS=Bos taurus OX=9913 GN=RSRC1 PE=2 SV=1	veNOG18112	J	GO:0000380//alternative mRNA splicing, via spliceosome;GO:0000380//alternative mRNA splicing, via spliceosome;GO:0000398//mRNA splicing, via spliceosome;GO:0000398//mRNA splicing, via spliceosome;GO:0006468//protein phosphorylation;GO:0006913//nucleocytoplasmic transport;GO:0008380//RNA splicing;GO:0046677//response to antibiotic;GO:0000380//alternative mRNA splicing, via spliceosome;GO:0000398//…	GO:0005634//nucleus;GO:0005737//cytoplasm;GO:0016607//nuclear speck;	-	-
MSTRG.10021	ENSBGRG00000014790	MSTRG.10021.1	38725	1[-]118572512-118575070	1[+]118526670-118533787	LXN	GO:0008191;GO:0050965;	K23594	latexin [Source:HGNC Symbol;Acc:HGNC:13347]	sp|P70202|LXN_MOUSE Latexin OS=Mus musculus OX=10090 GN=Lxn PE=1 SV=2	veNOG12211	R	GO:0050965//detection of temperature stimulus involved in sensory perception of pain;	-	GO:0008191//metalloendopeptidase inhibitor activity;	-
MSTRG.10021	ENSBGRG00000014425	MSTRG.10021.1	64563	1[-]118572512-118575070	1[+]118460976-118507949	RARRES1	GO:0008285;	K23595	retinoic acid receptor responder 1 [Source:HGNC Symbol;Acc:HGNC:9867]	sp|P49788|TIG1_HUMAN Retinoic acid receptor responder protein 1 OS=Homo sapiens OX=9606 GN=RARRES1 PE=1 SV=2	veNOG09710	T	GO:0008285//negative regulation of cell population proliferation;	-	-	-
MSTRG.10021	ENSBGRG00000014908	MSTRG.10021.1	1985	1[-]118572512-118575070	1[-]118577055-118612617	MLF1	-	K15622	myeloid leukemia factor 1 [Source:HGNC Symbol;Acc:HGNC:7125]	sp|Q32KY3|MLF1_BOVIN Myeloid leukemia factor 1 OS=Bos taurus OX=9913 GN=MLF1 PE=2 SV=1	veNOG16002	K	-	-	-	ko05202(Transcriptional misregulation in cancer)
MSTRG.10021	ENSBGRG00000014469	MSTRG.10021.1	2767	1[-]118572512-118575070	1[-]118512012-118569745	GFM1	GO:0003746;GO:0003746;GO:0003924;GO:0003924;GO:0005525;GO:0006414;GO:0070125;	K02355	G elongation factor mitochondrial 1 [Source:HGNC Symbol;Acc:HGNC:13780]	sp|Q07803|EFGM_RAT Elongation factor G, mitochondrial OS=Rattus norvegicus OX=10116 GN=Gfm1 PE=1 SV=2	veNOG12485	J	GO:0006414//translational elongation;GO:0070125//mitochondrial translational elongation;	-	GO:0003746//translation elongation factor activity;GO:0003746//translation elongation factor activity;GO:0003924//GTPase activity;GO:0003924//GTPase activity;GO:0005525//GTP binding;	-
MSTRG.100217	ENSBGRG00000019975	MSTRG.100217.1	0	19[-]37603111-37604550	19[-]37338160-37645690	SHISA6	GO:0007283;GO:0014069;GO:0030165;GO:0032281;GO:0035255;GO:0090090;GO:0098962;GO:0098970;GO:0098976;GO:0098978;GO:0098985;GO:0099061;GO:1904717;	-	shisa family member 6 [Source:HGNC Symbol;Acc:HGNC:34491]	sp|Q3UH99|SHSA6_MOUSE Protein shisa-6 OS=Mus musculus OX=10090 GN=Shisa6 PE=1 SV=1	veNOG12051	R	GO:0007283//spermatogenesis;GO:0090090//negative regulation of canonical Wnt signaling pathway;GO:0098962//regulation of postsynaptic neurotransmitter receptor activity;GO:0098970//postsynaptic neurotransmitter receptor diffusion trapping;GO:0098976//excitatory chemical synaptic transmission;GO:1904717//regulation of AMPA glutamate receptor clustering;	GO:0014069//postsynaptic density;GO:0032281//AMPA glutamate receptor complex;GO:0098978//glutamatergic synapse;GO:0098985//asymmetric, glutamatergic, excitatory synapse;GO:0099061//integral component of postsynaptic density membrane;	GO:0030165//PDZ domain binding;GO:0035255//ionotropic glutamate receptor binding;	-
MSTRG.10023	ENSBGRG00000015425	MSTRG.10023.1	55010	1[-]118586288-118587572	1[-]118642582-119113781	RSRC1	GO:0000380;GO:0000380;GO:0000398;GO:0000398;GO:0005634;GO:0005737;GO:0006468;GO:0006913;GO:0008380;GO:0016607;GO:0046677;GO:0000380;GO:0000398;GO:0000380;GO:0000398;GO:0000380;GO:0000398;	K24594	arginine and serine rich coiled-coil 1 [Source:HGNC Symbol;Acc:HGNC:24152]	sp|Q2T9Y0|RSRC1_BOVIN Serine/Arginine-related protein 53 OS=Bos taurus OX=9913 GN=RSRC1 PE=2 SV=1	veNOG18112	J	GO:0000380//alternative mRNA splicing, via spliceosome;GO:0000380//alternative mRNA splicing, via spliceosome;GO:0000398//mRNA splicing, via spliceosome;GO:0000398//mRNA splicing, via spliceosome;GO:0006468//protein phosphorylation;GO:0006913//nucleocytoplasmic transport;GO:0008380//RNA splicing;GO:0046677//response to antibiotic;GO:0000380//alternative mRNA splicing, via spliceosome;GO:0000398//…	GO:0005634//nucleus;GO:0005737//cytoplasm;GO:0016607//nuclear speck;	-	-
MSTRG.10023	ENSBGRG00000014790	MSTRG.10023.1	52501	1[-]118586288-118587572	1[+]118526670-118533787	LXN	GO:0008191;GO:0050965;	K23594	latexin [Source:HGNC Symbol;Acc:HGNC:13347]	sp|P70202|LXN_MOUSE Latexin OS=Mus musculus OX=10090 GN=Lxn PE=1 SV=2	veNOG12211	R	GO:0050965//detection of temperature stimulus involved in sensory perception of pain;	-	GO:0008191//metalloendopeptidase inhibitor activity;	-
MSTRG.10023	ENSBGRG00000014425	MSTRG.10023.1	78339	1[-]118586288-118587572	1[+]118460976-118507949	RARRES1	GO:0008285;	K23595	retinoic acid receptor responder 1 [Source:HGNC Symbol;Acc:HGNC:9867]	sp|P49788|TIG1_HUMAN Retinoic acid receptor responder protein 1 OS=Homo sapiens OX=9606 GN=RARRES1 PE=1 SV=2	veNOG09710	T	GO:0008285//negative regulation of cell population proliferation;	-	-	-
MSTRG.10023	ENSBGRG00000014908	MSTRG.10023.1	0	1[-]118586288-118587572	1[-]118577055-118612617	MLF1	-	K15622	myeloid leukemia factor 1 [Source:HGNC Symbol;Acc:HGNC:7125]	sp|Q32KY3|MLF1_BOVIN Myeloid leukemia factor 1 OS=Bos taurus OX=9913 GN=MLF1 PE=2 SV=1	veNOG16002	K	-	-	-	ko05202(Transcriptional misregulation in cancer)
MSTRG.10023	ENSBGRG00000014469	MSTRG.10023.1	16543	1[-]118586288-118587572	1[-]118512012-118569745	GFM1	GO:0003746;GO:0003746;GO:0003924;GO:0003924;GO:0005525;GO:0006414;GO:0070125;	K02355	G elongation factor mitochondrial 1 [Source:HGNC Symbol;Acc:HGNC:13780]	sp|Q07803|EFGM_RAT Elongation factor G, mitochondrial OS=Rattus norvegicus OX=10116 GN=Gfm1 PE=1 SV=2	veNOG12485	J	GO:0006414//translational elongation;GO:0070125//mitochondrial translational elongation;	-	GO:0003746//translation elongation factor activity;GO:0003746//translation elongation factor activity;GO:0003924//GTPase activity;GO:0003924//GTPase activity;GO:0005525//GTP binding;	-
MSTRG.100238	ENSBGRG00000020285	MSTRG.100238.1	91593	19[+]38054324-38055710	19[+]37962318-37962731	PIRT	GO:0005547;GO:0005886;GO:0009408;GO:0044325;GO:0048015;GO:0048266;GO:1902936;GO:2001259;	-	phosphoinositide interacting regulator of transient receptor potential channels [Source:HGNC Symbol;Acc:HGNC:37239]	sp|P0C851|PIRT_HUMAN Phosphoinositide-interacting protein OS=Homo sapiens OX=9606 GN=PIRT PE=2 SV=2	veNOG21717	T	GO:0009408//response to heat;GO:0048015//phosphatidylinositol-mediated signaling;GO:0048266//behavioral response to pain;GO:2001259//positive regulation of cation channel activity;	GO:0005886//plasma membrane;	GO:0005547//phosphatidylinositol-3,4,5-trisphosphate binding;GO:0044325//transmembrane transporter binding;GO:1902936//phosphatidylinositol bisphosphate binding;	-
MSTRG.100238	ENSBGRG00000020599	MSTRG.100238.1	81104	19[+]38054324-38055710	19[+]38136814-38156124	MYH3	GO:0000146;GO:0003009;GO:0003774;GO:0005515;GO:0005524;GO:0016459;GO:0016459;GO:0016887;GO:0043292;GO:0046034;GO:0051015;GO:0051015;	K24220	myosin heavy chain 3 [Source:HGNC Symbol;Acc:HGNC:7573]	sp|P11055|MYH3_HUMAN Myosin-3 OS=Homo sapiens OX=9606 GN=MYH3 PE=1 SV=3	veNOG00003;COG5022	Z	GO:0003009//skeletal muscle contraction;GO:0046034//ATP metabolic process;	GO:0016459//myosin complex;GO:0016459//myosin complex;GO:0043292//contractile fiber;	GO:0000146//microfilament motor activity;GO:0003774//cytoskeletal motor activity;GO:0005515//protein binding;GO:0005524//ATP binding;GO:0016887//ATP hydrolysis activity;GO:0051015//actin filament binding;GO:0051015//actin filament binding;	-
MSTRG.100238	ENSBGRG00000020364	MSTRG.100238.1	0	19[+]38054324-38055710	19[+]38053322-38071837	-	-	-	-	sp|Q8BP07|TM220_MOUSE Transmembrane protein 220 OS=Mus musculus OX=10090 GN=Tmem220 PE=2 SV=1	veNOG20428	S	-	-	-	-
MSTRG.100238	ENSBGRG00000020319	MSTRG.100238.1	72130	19[+]38054324-38055710	19[+]37981955-37982194	TMEM238L	-	-	transmembrane protein 238 like [Source:HGNC Symbol;Acc:HGNC:44356]	sp|A6NJY4|T238L_HUMAN Transmembrane protein 238-like OS=Homo sapiens OX=9606 GN=TMEM238L PE=4 SV=3	veNOG26098	S	-	-	-	-
MSTRG.100238	ENSBGRG00000020506	MSTRG.100238.1	20017	19[+]38054324-38055710	19[-]38075727-38082790	ADPRM	GO:0016787;GO:0016787;	K01517	ADP-ribose/CDP-alcohol diphosphatase, manganese dependent [Source:HGNC Symbol;Acc:HGNC:30925]	sp|A7YY53|ADPRM_BOVIN Manganese-dependent ADP-ribose/CDP-alcohol diphosphatase OS=Bos taurus OX=9913 GN=ADPRM PE=2 SV=2	veNOG13462	F	-	-	GO:0016787//hydrolase activity;GO:0016787//hydrolase activity;	ko00564(Glycerophospholipid metabolism);ko00230(Purine metabolism)
MSTRG.100238	ENSBGRG00000020553	MSTRG.100238.1	26351	19[+]38054324-38055710	19[+]38082061-38103778	SCO1	GO:0005739;GO:0030016;GO:0031305;GO:0033617;	K07152	SCO cytochrome c oxidase assembly protein 1 [Source:HGNC Symbol;Acc:HGNC:10603]	sp|A1A4J8|SCO1_BOVIN Protein SCO1 homolog, mitochondrial OS=Bos taurus OX=9913 GN=SCO1 PE=2 SV=1	veNOG14742	C	GO:0033617//mitochondrial cytochrome c oxidase assembly;	GO:0005739//mitochondrion;GO:0030016//myofibril;GO:0031305//integral component of mitochondrial inner membrane;	-	-
MSTRG.10024	ENSBGRG00000015425	MSTRG.10024.1,MSTRG.10024.2	54775	1[-]118586628-118587807	1[-]118642582-119113781	RSRC1	GO:0000380;GO:0000380;GO:0000398;GO:0000398;GO:0005634;GO:0005737;GO:0006468;GO:0006913;GO:0008380;GO:0016607;GO:0046677;GO:0000380;GO:0000398;GO:0000380;GO:0000398;GO:0000380;GO:0000398;	K24594	arginine and serine rich coiled-coil 1 [Source:HGNC Symbol;Acc:HGNC:24152]	sp|Q2T9Y0|RSRC1_BOVIN Serine/Arginine-related protein 53 OS=Bos taurus OX=9913 GN=RSRC1 PE=2 SV=1	veNOG18112	J	GO:0000380//alternative mRNA splicing, via spliceosome;GO:0000380//alternative mRNA splicing, via spliceosome;GO:0000398//mRNA splicing, via spliceosome;GO:0000398//mRNA splicing, via spliceosome;GO:0006468//protein phosphorylation;GO:0006913//nucleocytoplasmic transport;GO:0008380//RNA splicing;GO:0046677//response to antibiotic;GO:0000380//alternative mRNA splicing, via spliceosome;GO:0000398//…	GO:0005634//nucleus;GO:0005737//cytoplasm;GO:0016607//nuclear speck;	-	-
MSTRG.10024	ENSBGRG00000014790	MSTRG.10024.1,MSTRG.10024.2	52841	1[-]118586628-118587807	1[+]118526670-118533787	LXN	GO:0008191;GO:0050965;	K23594	latexin [Source:HGNC Symbol;Acc:HGNC:13347]	sp|P70202|LXN_MOUSE Latexin OS=Mus musculus OX=10090 GN=Lxn PE=1 SV=2	veNOG12211	R	GO:0050965//detection of temperature stimulus involved in sensory perception of pain;	-	GO:0008191//metalloendopeptidase inhibitor activity;	-
MSTRG.10024	ENSBGRG00000014425	MSTRG.10024.1,MSTRG.10024.2	78679	1[-]118586628-118587807	1[+]118460976-118507949	RARRES1	GO:0008285;	K23595	retinoic acid receptor responder 1 [Source:HGNC Symbol;Acc:HGNC:9867]	sp|P49788|TIG1_HUMAN Retinoic acid receptor responder protein 1 OS=Homo sapiens OX=9606 GN=RARRES1 PE=1 SV=2	veNOG09710	T	GO:0008285//negative regulation of cell population proliferation;	-	-	-
MSTRG.10024	ENSBGRG00000014908	MSTRG.10024.1,MSTRG.10024.2	0	1[-]118586628-118587807	1[-]118577055-118612617	MLF1	-	K15622	myeloid leukemia factor 1 [Source:HGNC Symbol;Acc:HGNC:7125]	sp|Q32KY3|MLF1_BOVIN Myeloid leukemia factor 1 OS=Bos taurus OX=9913 GN=MLF1 PE=2 SV=1	veNOG16002	K	-	-	-	ko05202(Transcriptional misregulation in cancer)
MSTRG.10024	ENSBGRG00000014469	MSTRG.10024.1,MSTRG.10024.2	16883	1[-]118586628-118587807	1[-]118512012-118569745	GFM1	GO:0003746;GO:0003746;GO:0003924;GO:0003924;GO:0005525;GO:0006414;GO:0070125;	K02355	G elongation factor mitochondrial 1 [Source:HGNC Symbol;Acc:HGNC:13780]	sp|Q07803|EFGM_RAT Elongation factor G, mitochondrial OS=Rattus norvegicus OX=10116 GN=Gfm1 PE=1 SV=2	veNOG12485	J	GO:0006414//translational elongation;GO:0070125//mitochondrial translational elongation;	-	GO:0003746//translation elongation factor activity;GO:0003746//translation elongation factor activity;GO:0003924//GTPase activity;GO:0003924//GTPase activity;GO:0005525//GTP binding;	-
MSTRG.100241	ENSBGRG00000020599	MSTRG.100241.2,MSTRG.100241.1	71046	19[-]38064235-38065768	19[+]38136814-38156124	MYH3	GO:0000146;GO:0003009;GO:0003774;GO:0005515;GO:0005524;GO:0016459;GO:0016459;GO:0016887;GO:0043292;GO:0046034;GO:0051015;GO:0051015;	K24220	myosin heavy chain 3 [Source:HGNC Symbol;Acc:HGNC:7573]	sp|P11055|MYH3_HUMAN Myosin-3 OS=Homo sapiens OX=9606 GN=MYH3 PE=1 SV=3	veNOG00003;COG5022	Z	GO:0003009//skeletal muscle contraction;GO:0046034//ATP metabolic process;	GO:0016459//myosin complex;GO:0016459//myosin complex;GO:0043292//contractile fiber;	GO:0000146//microfilament motor activity;GO:0003774//cytoskeletal motor activity;GO:0005515//protein binding;GO:0005524//ATP binding;GO:0016887//ATP hydrolysis activity;GO:0051015//actin filament binding;GO:0051015//actin filament binding;	-
MSTRG.100241	ENSBGRG00000020364	MSTRG.100241.2,MSTRG.100241.1	0	19[-]38064235-38065768	19[+]38053322-38071837	-	-	-	-	sp|Q8BP07|TM220_MOUSE Transmembrane protein 220 OS=Mus musculus OX=10090 GN=Tmem220 PE=2 SV=1	veNOG20428	S	-	-	-	-
MSTRG.100241	ENSBGRG00000020319	MSTRG.100241.2,MSTRG.100241.1	82041	19[-]38064235-38065768	19[+]37981955-37982194	TMEM238L	-	-	transmembrane protein 238 like [Source:HGNC Symbol;Acc:HGNC:44356]	sp|A6NJY4|T238L_HUMAN Transmembrane protein 238-like OS=Homo sapiens OX=9606 GN=TMEM238L PE=4 SV=3	veNOG26098	S	-	-	-	-
MSTRG.100241	ENSBGRG00000020506	MSTRG.100241.2,MSTRG.100241.1	9959	19[-]38064235-38065768	19[-]38075727-38082790	ADPRM	GO:0016787;GO:0016787;	K01517	ADP-ribose/CDP-alcohol diphosphatase, manganese dependent [Source:HGNC Symbol;Acc:HGNC:30925]	sp|A7YY53|ADPRM_BOVIN Manganese-dependent ADP-ribose/CDP-alcohol diphosphatase OS=Bos taurus OX=9913 GN=ADPRM PE=2 SV=2	veNOG13462	F	-	-	GO:0016787//hydrolase activity;GO:0016787//hydrolase activity;	ko00564(Glycerophospholipid metabolism);ko00230(Purine metabolism)
MSTRG.100241	ENSBGRG00000020553	MSTRG.100241.2,MSTRG.100241.1	16293	19[-]38064235-38065768	19[+]38082061-38103778	SCO1	GO:0005739;GO:0030016;GO:0031305;GO:0033617;	K07152	SCO cytochrome c oxidase assembly protein 1 [Source:HGNC Symbol;Acc:HGNC:10603]	sp|A1A4J8|SCO1_BOVIN Protein SCO1 homolog, mitochondrial OS=Bos taurus OX=9913 GN=SCO1 PE=2 SV=1	veNOG14742	C	GO:0033617//mitochondrial cytochrome c oxidase assembly;	GO:0005739//mitochondrion;GO:0030016//myofibril;GO:0031305//integral component of mitochondrial inner membrane;	-	-
MSTRG.100243	ENSBGRG00000020599	MSTRG.100243.1	66153	19[-]38069244-38070661	19[+]38136814-38156124	MYH3	GO:0000146;GO:0003009;GO:0003774;GO:0005515;GO:0005524;GO:0016459;GO:0016459;GO:0016887;GO:0043292;GO:0046034;GO:0051015;GO:0051015;	K24220	myosin heavy chain 3 [Source:HGNC Symbol;Acc:HGNC:7573]	sp|P11055|MYH3_HUMAN Myosin-3 OS=Homo sapiens OX=9606 GN=MYH3 PE=1 SV=3	veNOG00003;COG5022	Z	GO:0003009//skeletal muscle contraction;GO:0046034//ATP metabolic process;	GO:0016459//myosin complex;GO:0016459//myosin complex;GO:0043292//contractile fiber;	GO:0000146//microfilament motor activity;GO:0003774//cytoskeletal motor activity;GO:0005515//protein binding;GO:0005524//ATP binding;GO:0016887//ATP hydrolysis activity;GO:0051015//actin filament binding;GO:0051015//actin filament binding;	-
MSTRG.100243	ENSBGRG00000020364	MSTRG.100243.1	0	19[-]38069244-38070661	19[+]38053322-38071837	-	-	-	-	sp|Q8BP07|TM220_MOUSE Transmembrane protein 220 OS=Mus musculus OX=10090 GN=Tmem220 PE=2 SV=1	veNOG20428	S	-	-	-	-
MSTRG.100243	ENSBGRG00000020319	MSTRG.100243.1	87050	19[-]38069244-38070661	19[+]37981955-37982194	TMEM238L	-	-	transmembrane protein 238 like [Source:HGNC Symbol;Acc:HGNC:44356]	sp|A6NJY4|T238L_HUMAN Transmembrane protein 238-like OS=Homo sapiens OX=9606 GN=TMEM238L PE=4 SV=3	veNOG26098	S	-	-	-	-
MSTRG.100243	ENSBGRG00000020506	MSTRG.100243.1	5066	19[-]38069244-38070661	19[-]38075727-38082790	ADPRM	GO:0016787;GO:0016787;	K01517	ADP-ribose/CDP-alcohol diphosphatase, manganese dependent [Source:HGNC Symbol;Acc:HGNC:30925]	sp|A7YY53|ADPRM_BOVIN Manganese-dependent ADP-ribose/CDP-alcohol diphosphatase OS=Bos taurus OX=9913 GN=ADPRM PE=2 SV=2	veNOG13462	F	-	-	GO:0016787//hydrolase activity;GO:0016787//hydrolase activity;	ko00564(Glycerophospholipid metabolism);ko00230(Purine metabolism)
MSTRG.100243	ENSBGRG00000020553	MSTRG.100243.1	11400	19[-]38069244-38070661	19[+]38082061-38103778	SCO1	GO:0005739;GO:0030016;GO:0031305;GO:0033617;	K07152	SCO cytochrome c oxidase assembly protein 1 [Source:HGNC Symbol;Acc:HGNC:10603]	sp|A1A4J8|SCO1_BOVIN Protein SCO1 homolog, mitochondrial OS=Bos taurus OX=9913 GN=SCO1 PE=2 SV=1	veNOG14742	C	GO:0033617//mitochondrial cytochrome c oxidase assembly;	GO:0005739//mitochondrion;GO:0030016//myofibril;GO:0031305//integral component of mitochondrial inner membrane;	-	-
MSTRG.100245	ENSBGRG00000020599	MSTRG.100245.1	63215	19[-]38072363-38073599	19[+]38136814-38156124	MYH3	GO:0000146;GO:0003009;GO:0003774;GO:0005515;GO:0005524;GO:0016459;GO:0016459;GO:0016887;GO:0043292;GO:0046034;GO:0051015;GO:0051015;	K24220	myosin heavy chain 3 [Source:HGNC Symbol;Acc:HGNC:7573]	sp|P11055|MYH3_HUMAN Myosin-3 OS=Homo sapiens OX=9606 GN=MYH3 PE=1 SV=3	veNOG00003;COG5022	Z	GO:0003009//skeletal muscle contraction;GO:0046034//ATP metabolic process;	GO:0016459//myosin complex;GO:0016459//myosin complex;GO:0043292//contractile fiber;	GO:0000146//microfilament motor activity;GO:0003774//cytoskeletal motor activity;GO:0005515//protein binding;GO:0005524//ATP binding;GO:0016887//ATP hydrolysis activity;GO:0051015//actin filament binding;GO:0051015//actin filament binding;	-
MSTRG.100245	ENSBGRG00000020364	MSTRG.100245.1	526	19[-]38072363-38073599	19[+]38053322-38071837	-	-	-	-	sp|Q8BP07|TM220_MOUSE Transmembrane protein 220 OS=Mus musculus OX=10090 GN=Tmem220 PE=2 SV=1	veNOG20428	S	-	-	-	-
MSTRG.100245	ENSBGRG00000020319	MSTRG.100245.1	90169	19[-]38072363-38073599	19[+]37981955-37982194	TMEM238L	-	-	transmembrane protein 238 like [Source:HGNC Symbol;Acc:HGNC:44356]	sp|A6NJY4|T238L_HUMAN Transmembrane protein 238-like OS=Homo sapiens OX=9606 GN=TMEM238L PE=4 SV=3	veNOG26098	S	-	-	-	-
MSTRG.100245	ENSBGRG00000020506	MSTRG.100245.1	2128	19[-]38072363-38073599	19[-]38075727-38082790	ADPRM	GO:0016787;GO:0016787;	K01517	ADP-ribose/CDP-alcohol diphosphatase, manganese dependent [Source:HGNC Symbol;Acc:HGNC:30925]	sp|A7YY53|ADPRM_BOVIN Manganese-dependent ADP-ribose/CDP-alcohol diphosphatase OS=Bos taurus OX=9913 GN=ADPRM PE=2 SV=2	veNOG13462	F	-	-	GO:0016787//hydrolase activity;GO:0016787//hydrolase activity;	ko00564(Glycerophospholipid metabolism);ko00230(Purine metabolism)
MSTRG.100245	ENSBGRG00000020553	MSTRG.100245.1	8462	19[-]38072363-38073599	19[+]38082061-38103778	SCO1	GO:0005739;GO:0030016;GO:0031305;GO:0033617;	K07152	SCO cytochrome c oxidase assembly protein 1 [Source:HGNC Symbol;Acc:HGNC:10603]	sp|A1A4J8|SCO1_BOVIN Protein SCO1 homolog, mitochondrial OS=Bos taurus OX=9913 GN=SCO1 PE=2 SV=1	veNOG14742	C	GO:0033617//mitochondrial cytochrome c oxidase assembly;	GO:0005739//mitochondrion;GO:0030016//myofibril;GO:0031305//integral component of mitochondrial inner membrane;	-	-
MSTRG.100251	ENSBGRG00000020599	MSTRG.100251.1	48809	19[+]38086689-38088005	19[+]38136814-38156124	MYH3	GO:0000146;GO:0003009;GO:0003774;GO:0005515;GO:0005524;GO:0016459;GO:0016459;GO:0016887;GO:0043292;GO:0046034;GO:0051015;GO:0051015;	K24220	myosin heavy chain 3 [Source:HGNC Symbol;Acc:HGNC:7573]	sp|P11055|MYH3_HUMAN Myosin-3 OS=Homo sapiens OX=9606 GN=MYH3 PE=1 SV=3	veNOG00003;COG5022	Z	GO:0003009//skeletal muscle contraction;GO:0046034//ATP metabolic process;	GO:0016459//myosin complex;GO:0016459//myosin complex;GO:0043292//contractile fiber;	GO:0000146//microfilament motor activity;GO:0003774//cytoskeletal motor activity;GO:0005515//protein binding;GO:0005524//ATP binding;GO:0016887//ATP hydrolysis activity;GO:0051015//actin filament binding;GO:0051015//actin filament binding;	-
MSTRG.100251	ENSBGRG00000020364	MSTRG.100251.1	14852	19[+]38086689-38088005	19[+]38053322-38071837	-	-	-	-	sp|Q8BP07|TM220_MOUSE Transmembrane protein 220 OS=Mus musculus OX=10090 GN=Tmem220 PE=2 SV=1	veNOG20428	S	-	-	-	-
MSTRG.100251	ENSBGRG00000020506	MSTRG.100251.1	3899	19[+]38086689-38088005	19[-]38075727-38082790	ADPRM	GO:0016787;GO:0016787;	K01517	ADP-ribose/CDP-alcohol diphosphatase, manganese dependent [Source:HGNC Symbol;Acc:HGNC:30925]	sp|A7YY53|ADPRM_BOVIN Manganese-dependent ADP-ribose/CDP-alcohol diphosphatase OS=Bos taurus OX=9913 GN=ADPRM PE=2 SV=2	veNOG13462	F	-	-	GO:0016787//hydrolase activity;GO:0016787//hydrolase activity;	ko00564(Glycerophospholipid metabolism);ko00230(Purine metabolism)
MSTRG.100251	ENSBGRG00000020553	MSTRG.100251.1	0	19[+]38086689-38088005	19[+]38082061-38103778	SCO1	GO:0005739;GO:0030016;GO:0031305;GO:0033617;	K07152	SCO cytochrome c oxidase assembly protein 1 [Source:HGNC Symbol;Acc:HGNC:10603]	sp|A1A4J8|SCO1_BOVIN Protein SCO1 homolog, mitochondrial OS=Bos taurus OX=9913 GN=SCO1 PE=2 SV=1	veNOG14742	C	GO:0033617//mitochondrial cytochrome c oxidase assembly;	GO:0005739//mitochondrion;GO:0030016//myofibril;GO:0031305//integral component of mitochondrial inner membrane;	-	-
MSTRG.100258	ENSBGRG00000020599	MSTRG.100258.1	18617	19[+]38104695-38118197	19[+]38136814-38156124	MYH3	GO:0000146;GO:0003009;GO:0003774;GO:0005515;GO:0005524;GO:0016459;GO:0016459;GO:0016887;GO:0043292;GO:0046034;GO:0051015;GO:0051015;	K24220	myosin heavy chain 3 [Source:HGNC Symbol;Acc:HGNC:7573]	sp|P11055|MYH3_HUMAN Myosin-3 OS=Homo sapiens OX=9606 GN=MYH3 PE=1 SV=3	veNOG00003;COG5022	Z	GO:0003009//skeletal muscle contraction;GO:0046034//ATP metabolic process;	GO:0016459//myosin complex;GO:0016459//myosin complex;GO:0043292//contractile fiber;	GO:0000146//microfilament motor activity;GO:0003774//cytoskeletal motor activity;GO:0005515//protein binding;GO:0005524//ATP binding;GO:0016887//ATP hydrolysis activity;GO:0051015//actin filament binding;GO:0051015//actin filament binding;	-
MSTRG.100258	ENSBGRG00000020364	MSTRG.100258.1	32858	19[+]38104695-38118197	19[+]38053322-38071837	-	-	-	-	sp|Q8BP07|TM220_MOUSE Transmembrane protein 220 OS=Mus musculus OX=10090 GN=Tmem220 PE=2 SV=1	veNOG20428	S	-	-	-	-
MSTRG.100258	ENSBGRG00000020506	MSTRG.100258.1	21905	19[+]38104695-38118197	19[-]38075727-38082790	ADPRM	GO:0016787;GO:0016787;	K01517	ADP-ribose/CDP-alcohol diphosphatase, manganese dependent [Source:HGNC Symbol;Acc:HGNC:30925]	sp|A7YY53|ADPRM_BOVIN Manganese-dependent ADP-ribose/CDP-alcohol diphosphatase OS=Bos taurus OX=9913 GN=ADPRM PE=2 SV=2	veNOG13462	F	-	-	GO:0016787//hydrolase activity;GO:0016787//hydrolase activity;	ko00564(Glycerophospholipid metabolism);ko00230(Purine metabolism)
MSTRG.100258	ENSBGRG00000020553	MSTRG.100258.1	917	19[+]38104695-38118197	19[+]38082061-38103778	SCO1	GO:0005739;GO:0030016;GO:0031305;GO:0033617;	K07152	SCO cytochrome c oxidase assembly protein 1 [Source:HGNC Symbol;Acc:HGNC:10603]	sp|A1A4J8|SCO1_BOVIN Protein SCO1 homolog, mitochondrial OS=Bos taurus OX=9913 GN=SCO1 PE=2 SV=1	veNOG14742	C	GO:0033617//mitochondrial cytochrome c oxidase assembly;	GO:0005739//mitochondrion;GO:0030016//myofibril;GO:0031305//integral component of mitochondrial inner membrane;	-	-
MSTRG.100259	ENSBGRG00000020599	MSTRG.100259.1	24981	19[+]38110264-38111833	19[+]38136814-38156124	MYH3	GO:0000146;GO:0003009;GO:0003774;GO:0005515;GO:0005524;GO:0016459;GO:0016459;GO:0016887;GO:0043292;GO:0046034;GO:0051015;GO:0051015;	K24220	myosin heavy chain 3 [Source:HGNC Symbol;Acc:HGNC:7573]	sp|P11055|MYH3_HUMAN Myosin-3 OS=Homo sapiens OX=9606 GN=MYH3 PE=1 SV=3	veNOG00003;COG5022	Z	GO:0003009//skeletal muscle contraction;GO:0046034//ATP metabolic process;	GO:0016459//myosin complex;GO:0016459//myosin complex;GO:0043292//contractile fiber;	GO:0000146//microfilament motor activity;GO:0003774//cytoskeletal motor activity;GO:0005515//protein binding;GO:0005524//ATP binding;GO:0016887//ATP hydrolysis activity;GO:0051015//actin filament binding;GO:0051015//actin filament binding;	-
MSTRG.100259	ENSBGRG00000020364	MSTRG.100259.1	38427	19[+]38110264-38111833	19[+]38053322-38071837	-	-	-	-	sp|Q8BP07|TM220_MOUSE Transmembrane protein 220 OS=Mus musculus OX=10090 GN=Tmem220 PE=2 SV=1	veNOG20428	S	-	-	-	-
MSTRG.100259	ENSBGRG00000020506	MSTRG.100259.1	27474	19[+]38110264-38111833	19[-]38075727-38082790	ADPRM	GO:0016787;GO:0016787;	K01517	ADP-ribose/CDP-alcohol diphosphatase, manganese dependent [Source:HGNC Symbol;Acc:HGNC:30925]	sp|A7YY53|ADPRM_BOVIN Manganese-dependent ADP-ribose/CDP-alcohol diphosphatase OS=Bos taurus OX=9913 GN=ADPRM PE=2 SV=2	veNOG13462	F	-	-	GO:0016787//hydrolase activity;GO:0016787//hydrolase activity;	ko00564(Glycerophospholipid metabolism);ko00230(Purine metabolism)
MSTRG.100259	ENSBGRG00000020553	MSTRG.100259.1	6486	19[+]38110264-38111833	19[+]38082061-38103778	SCO1	GO:0005739;GO:0030016;GO:0031305;GO:0033617;	K07152	SCO cytochrome c oxidase assembly protein 1 [Source:HGNC Symbol;Acc:HGNC:10603]	sp|A1A4J8|SCO1_BOVIN Protein SCO1 homolog, mitochondrial OS=Bos taurus OX=9913 GN=SCO1 PE=2 SV=1	veNOG14742	C	GO:0033617//mitochondrial cytochrome c oxidase assembly;	GO:0005739//mitochondrion;GO:0030016//myofibril;GO:0031305//integral component of mitochondrial inner membrane;	-	-
MSTRG.10026	ENSBGRG00000015425	MSTRG.10026.1	18547	1[-]118622498-118624035	1[-]118642582-119113781	RSRC1	GO:0000380;GO:0000380;GO:0000398;GO:0000398;GO:0005634;GO:0005737;GO:0006468;GO:0006913;GO:0008380;GO:0016607;GO:0046677;GO:0000380;GO:0000398;GO:0000380;GO:0000398;GO:0000380;GO:0000398;	K24594	arginine and serine rich coiled-coil 1 [Source:HGNC Symbol;Acc:HGNC:24152]	sp|Q2T9Y0|RSRC1_BOVIN Serine/Arginine-related protein 53 OS=Bos taurus OX=9913 GN=RSRC1 PE=2 SV=1	veNOG18112	J	GO:0000380//alternative mRNA splicing, via spliceosome;GO:0000380//alternative mRNA splicing, via spliceosome;GO:0000398//mRNA splicing, via spliceosome;GO:0000398//mRNA splicing, via spliceosome;GO:0006468//protein phosphorylation;GO:0006913//nucleocytoplasmic transport;GO:0008380//RNA splicing;GO:0046677//response to antibiotic;GO:0000380//alternative mRNA splicing, via spliceosome;GO:0000398//…	GO:0005634//nucleus;GO:0005737//cytoplasm;GO:0016607//nuclear speck;	-	-
MSTRG.10026	ENSBGRG00000014790	MSTRG.10026.1	88711	1[-]118622498-118624035	1[+]118526670-118533787	LXN	GO:0008191;GO:0050965;	K23594	latexin [Source:HGNC Symbol;Acc:HGNC:13347]	sp|P70202|LXN_MOUSE Latexin OS=Mus musculus OX=10090 GN=Lxn PE=1 SV=2	veNOG12211	R	GO:0050965//detection of temperature stimulus involved in sensory perception of pain;	-	GO:0008191//metalloendopeptidase inhibitor activity;	-
MSTRG.10026	ENSBGRG00000014908	MSTRG.10026.1	9881	1[-]118622498-118624035	1[-]118577055-118612617	MLF1	-	K15622	myeloid leukemia factor 1 [Source:HGNC Symbol;Acc:HGNC:7125]	sp|Q32KY3|MLF1_BOVIN Myeloid leukemia factor 1 OS=Bos taurus OX=9913 GN=MLF1 PE=2 SV=1	veNOG16002	K	-	-	-	ko05202(Transcriptional misregulation in cancer)
MSTRG.10026	ENSBGRG00000014469	MSTRG.10026.1	52753	1[-]118622498-118624035	1[-]118512012-118569745	GFM1	GO:0003746;GO:0003746;GO:0003924;GO:0003924;GO:0005525;GO:0006414;GO:0070125;	K02355	G elongation factor mitochondrial 1 [Source:HGNC Symbol;Acc:HGNC:13780]	sp|Q07803|EFGM_RAT Elongation factor G, mitochondrial OS=Rattus norvegicus OX=10116 GN=Gfm1 PE=1 SV=2	veNOG12485	J	GO:0006414//translational elongation;GO:0070125//mitochondrial translational elongation;	-	GO:0003746//translation elongation factor activity;GO:0003746//translation elongation factor activity;GO:0003924//GTPase activity;GO:0003924//GTPase activity;GO:0005525//GTP binding;	-
MSTRG.10027	ENSBGRG00000015425	MSTRG.10027.1	18039	1[-]118623078-118624543	1[-]118642582-119113781	RSRC1	GO:0000380;GO:0000380;GO:0000398;GO:0000398;GO:0005634;GO:0005737;GO:0006468;GO:0006913;GO:0008380;GO:0016607;GO:0046677;GO:0000380;GO:0000398;GO:0000380;GO:0000398;GO:0000380;GO:0000398;	K24594	arginine and serine rich coiled-coil 1 [Source:HGNC Symbol;Acc:HGNC:24152]	sp|Q2T9Y0|RSRC1_BOVIN Serine/Arginine-related protein 53 OS=Bos taurus OX=9913 GN=RSRC1 PE=2 SV=1	veNOG18112	J	GO:0000380//alternative mRNA splicing, via spliceosome;GO:0000380//alternative mRNA splicing, via spliceosome;GO:0000398//mRNA splicing, via spliceosome;GO:0000398//mRNA splicing, via spliceosome;GO:0006468//protein phosphorylation;GO:0006913//nucleocytoplasmic transport;GO:0008380//RNA splicing;GO:0046677//response to antibiotic;GO:0000380//alternative mRNA splicing, via spliceosome;GO:0000398//…	GO:0005634//nucleus;GO:0005737//cytoplasm;GO:0016607//nuclear speck;	-	-
MSTRG.10027	ENSBGRG00000014790	MSTRG.10027.1	89291	1[-]118623078-118624543	1[+]118526670-118533787	LXN	GO:0008191;GO:0050965;	K23594	latexin [Source:HGNC Symbol;Acc:HGNC:13347]	sp|P70202|LXN_MOUSE Latexin OS=Mus musculus OX=10090 GN=Lxn PE=1 SV=2	veNOG12211	R	GO:0050965//detection of temperature stimulus involved in sensory perception of pain;	-	GO:0008191//metalloendopeptidase inhibitor activity;	-
MSTRG.10027	ENSBGRG00000014908	MSTRG.10027.1	10461	1[-]118623078-118624543	1[-]118577055-118612617	MLF1	-	K15622	myeloid leukemia factor 1 [Source:HGNC Symbol;Acc:HGNC:7125]	sp|Q32KY3|MLF1_BOVIN Myeloid leukemia factor 1 OS=Bos taurus OX=9913 GN=MLF1 PE=2 SV=1	veNOG16002	K	-	-	-	ko05202(Transcriptional misregulation in cancer)
MSTRG.10027	ENSBGRG00000014469	MSTRG.10027.1	53333	1[-]118623078-118624543	1[-]118512012-118569745	GFM1	GO:0003746;GO:0003746;GO:0003924;GO:0003924;GO:0005525;GO:0006414;GO:0070125;	K02355	G elongation factor mitochondrial 1 [Source:HGNC Symbol;Acc:HGNC:13780]	sp|Q07803|EFGM_RAT Elongation factor G, mitochondrial OS=Rattus norvegicus OX=10116 GN=Gfm1 PE=1 SV=2	veNOG12485	J	GO:0006414//translational elongation;GO:0070125//mitochondrial translational elongation;	-	GO:0003746//translation elongation factor activity;GO:0003746//translation elongation factor activity;GO:0003924//GTPase activity;GO:0003924//GTPase activity;GO:0005525//GTP binding;	-
MSTRG.100270	ENSBGRG00000020599	MSTRG.100270.1,MSTRG.100270.2	0	19[-]38152007-38153327	19[+]38136814-38156124	MYH3	GO:0000146;GO:0003009;GO:0003774;GO:0005515;GO:0005524;GO:0016459;GO:0016459;GO:0016887;GO:0043292;GO:0046034;GO:0051015;GO:0051015;	K24220	myosin heavy chain 3 [Source:HGNC Symbol;Acc:HGNC:7573]	sp|P11055|MYH3_HUMAN Myosin-3 OS=Homo sapiens OX=9606 GN=MYH3 PE=1 SV=3	veNOG00003;COG5022	Z	GO:0003009//skeletal muscle contraction;GO:0046034//ATP metabolic process;	GO:0016459//myosin complex;GO:0016459//myosin complex;GO:0043292//contractile fiber;	GO:0000146//microfilament motor activity;GO:0003774//cytoskeletal motor activity;GO:0005515//protein binding;GO:0005524//ATP binding;GO:0016887//ATP hydrolysis activity;GO:0051015//actin filament binding;GO:0051015//actin filament binding;	-
MSTRG.100270	ENSBGRG00000020364	MSTRG.100270.1,MSTRG.100270.2	80170	19[-]38152007-38153327	19[+]38053322-38071837	-	-	-	-	sp|Q8BP07|TM220_MOUSE Transmembrane protein 220 OS=Mus musculus OX=10090 GN=Tmem220 PE=2 SV=1	veNOG20428	S	-	-	-	-
MSTRG.100270	ENSBGRG00000020506	MSTRG.100270.1,MSTRG.100270.2	69217	19[-]38152007-38153327	19[-]38075727-38082790	ADPRM	GO:0016787;GO:0016787;	K01517	ADP-ribose/CDP-alcohol diphosphatase, manganese dependent [Source:HGNC Symbol;Acc:HGNC:30925]	sp|A7YY53|ADPRM_BOVIN Manganese-dependent ADP-ribose/CDP-alcohol diphosphatase OS=Bos taurus OX=9913 GN=ADPRM PE=2 SV=2	veNOG13462	F	-	-	GO:0016787//hydrolase activity;GO:0016787//hydrolase activity;	ko00564(Glycerophospholipid metabolism);ko00230(Purine metabolism)
MSTRG.100270	ENSBGRG00000020872	MSTRG.100270.1,MSTRG.100270.2	74488	19[-]38152007-38153327	19[+]38227815-38258374	MYH2	GO:0003774;GO:0005515;GO:0005524;GO:0005911;GO:0006936;GO:0016459;GO:0030016;GO:0032991;GO:0051015;GO:0003774;GO:0005524;GO:0016459;GO:0051015;	K24220	myosin heavy chain 2 [Source:HGNC Symbol;Acc:HGNC:7572]	sp|Q9BE41|MYH2_BOVIN Myosin-2 OS=Bos taurus OX=9913 GN=MYH2 PE=2 SV=1	COG5022;veNOG00003	Z	GO:0006936//muscle contraction;	GO:0005911//cell-cell junction;GO:0016459//myosin complex;GO:0030016//myofibril;GO:0032991//protein-containing complex;GO:0016459//myosin complex;	GO:0003774//cytoskeletal motor activity;GO:0005515//protein binding;GO:0005524//ATP binding;GO:0051015//actin filament binding;GO:0003774//cytoskeletal motor activity;GO:0005524//ATP binding;GO:0051015//actin filament binding;	-
MSTRG.100270	ENSBGRG00000020553	MSTRG.100270.1,MSTRG.100270.2	48229	19[-]38152007-38153327	19[+]38082061-38103778	SCO1	GO:0005739;GO:0030016;GO:0031305;GO:0033617;	K07152	SCO cytochrome c oxidase assembly protein 1 [Source:HGNC Symbol;Acc:HGNC:10603]	sp|A1A4J8|SCO1_BOVIN Protein SCO1 homolog, mitochondrial OS=Bos taurus OX=9913 GN=SCO1 PE=2 SV=1	veNOG14742	C	GO:0033617//mitochondrial cytochrome c oxidase assembly;	GO:0005739//mitochondrion;GO:0030016//myofibril;GO:0031305//integral component of mitochondrial inner membrane;	-	-
MSTRG.100273	ENSBGRG00000020599	MSTRG.100273.1	2031	19[-]38158155-38189733	19[+]38136814-38156124	MYH3	GO:0000146;GO:0003009;GO:0003774;GO:0005515;GO:0005524;GO:0016459;GO:0016459;GO:0016887;GO:0043292;GO:0046034;GO:0051015;GO:0051015;	K24220	myosin heavy chain 3 [Source:HGNC Symbol;Acc:HGNC:7573]	sp|P11055|MYH3_HUMAN Myosin-3 OS=Homo sapiens OX=9606 GN=MYH3 PE=1 SV=3	veNOG00003;COG5022	Z	GO:0003009//skeletal muscle contraction;GO:0046034//ATP metabolic process;	GO:0016459//myosin complex;GO:0016459//myosin complex;GO:0043292//contractile fiber;	GO:0000146//microfilament motor activity;GO:0003774//cytoskeletal motor activity;GO:0005515//protein binding;GO:0005524//ATP binding;GO:0016887//ATP hydrolysis activity;GO:0051015//actin filament binding;GO:0051015//actin filament binding;	-
MSTRG.100273	ENSBGRG00000021031	MSTRG.100273.1	73667	19[-]38158155-38189733	19[+]38263400-38288443	MYH1	GO:0003774;GO:0005515;GO:0005524;GO:0005859;GO:0014704;GO:0016459;GO:0031672;GO:0036464;GO:0051015;	K24220	myosin heavy chain 1 [Source:HGNC Symbol;Acc:HGNC:7567]	sp|Q9BE40|MYH1_BOVIN Myosin-1 OS=Bos taurus OX=9913 GN=MYH1 PE=2 SV=2	veNOG00003	Z	-	GO:0005859//muscle myosin complex;GO:0014704//intercalated disc;GO:0016459//myosin complex;GO:0031672//A band;GO:0036464//cytoplasmic ribonucleoprotein granule;	GO:0003774//cytoskeletal motor activity;GO:0005515//protein binding;GO:0005524//ATP binding;GO:0051015//actin filament binding;	-
MSTRG.100273	ENSBGRG00000020364	MSTRG.100273.1	86318	19[-]38158155-38189733	19[+]38053322-38071837	-	-	-	-	sp|Q8BP07|TM220_MOUSE Transmembrane protein 220 OS=Mus musculus OX=10090 GN=Tmem220 PE=2 SV=1	veNOG20428	S	-	-	-	-
MSTRG.100273	ENSBGRG00000020506	MSTRG.100273.1	75365	19[-]38158155-38189733	19[-]38075727-38082790	ADPRM	GO:0016787;GO:0016787;	K01517	ADP-ribose/CDP-alcohol diphosphatase, manganese dependent [Source:HGNC Symbol;Acc:HGNC:30925]	sp|A7YY53|ADPRM_BOVIN Manganese-dependent ADP-ribose/CDP-alcohol diphosphatase OS=Bos taurus OX=9913 GN=ADPRM PE=2 SV=2	veNOG13462	F	-	-	GO:0016787//hydrolase activity;GO:0016787//hydrolase activity;	ko00564(Glycerophospholipid metabolism);ko00230(Purine metabolism)
MSTRG.100273	ENSBGRG00000020872	MSTRG.100273.1	38082	19[-]38158155-38189733	19[+]38227815-38258374	MYH2	GO:0003774;GO:0005515;GO:0005524;GO:0005911;GO:0006936;GO:0016459;GO:0030016;GO:0032991;GO:0051015;GO:0003774;GO:0005524;GO:0016459;GO:0051015;	K24220	myosin heavy chain 2 [Source:HGNC Symbol;Acc:HGNC:7572]	sp|Q9BE41|MYH2_BOVIN Myosin-2 OS=Bos taurus OX=9913 GN=MYH2 PE=2 SV=1	COG5022;veNOG00003	Z	GO:0006936//muscle contraction;	GO:0005911//cell-cell junction;GO:0016459//myosin complex;GO:0030016//myofibril;GO:0032991//protein-containing complex;GO:0016459//myosin complex;	GO:0003774//cytoskeletal motor activity;GO:0005515//protein binding;GO:0005524//ATP binding;GO:0051015//actin filament binding;GO:0003774//cytoskeletal motor activity;GO:0005524//ATP binding;GO:0051015//actin filament binding;	-
MSTRG.100273	ENSBGRG00000020553	MSTRG.100273.1	54377	19[-]38158155-38189733	19[+]38082061-38103778	SCO1	GO:0005739;GO:0030016;GO:0031305;GO:0033617;	K07152	SCO cytochrome c oxidase assembly protein 1 [Source:HGNC Symbol;Acc:HGNC:10603]	sp|A1A4J8|SCO1_BOVIN Protein SCO1 homolog, mitochondrial OS=Bos taurus OX=9913 GN=SCO1 PE=2 SV=1	veNOG14742	C	GO:0033617//mitochondrial cytochrome c oxidase assembly;	GO:0005739//mitochondrion;GO:0030016//myofibril;GO:0031305//integral component of mitochondrial inner membrane;	-	-
MSTRG.100274	ENSBGRG00000020599	MSTRG.100274.1	20367	19[-]38176491-38178265	19[+]38136814-38156124	MYH3	GO:0000146;GO:0003009;GO:0003774;GO:0005515;GO:0005524;GO:0016459;GO:0016459;GO:0016887;GO:0043292;GO:0046034;GO:0051015;GO:0051015;	K24220	myosin heavy chain 3 [Source:HGNC Symbol;Acc:HGNC:7573]	sp|P11055|MYH3_HUMAN Myosin-3 OS=Homo sapiens OX=9606 GN=MYH3 PE=1 SV=3	veNOG00003;COG5022	Z	GO:0003009//skeletal muscle contraction;GO:0046034//ATP metabolic process;	GO:0016459//myosin complex;GO:0016459//myosin complex;GO:0043292//contractile fiber;	GO:0000146//microfilament motor activity;GO:0003774//cytoskeletal motor activity;GO:0005515//protein binding;GO:0005524//ATP binding;GO:0016887//ATP hydrolysis activity;GO:0051015//actin filament binding;GO:0051015//actin filament binding;	-
MSTRG.100274	ENSBGRG00000021031	MSTRG.100274.1	85135	19[-]38176491-38178265	19[+]38263400-38288443	MYH1	GO:0003774;GO:0005515;GO:0005524;GO:0005859;GO:0014704;GO:0016459;GO:0031672;GO:0036464;GO:0051015;	K24220	myosin heavy chain 1 [Source:HGNC Symbol;Acc:HGNC:7567]	sp|Q9BE40|MYH1_BOVIN Myosin-1 OS=Bos taurus OX=9913 GN=MYH1 PE=2 SV=2	veNOG00003	Z	-	GO:0005859//muscle myosin complex;GO:0014704//intercalated disc;GO:0016459//myosin complex;GO:0031672//A band;GO:0036464//cytoplasmic ribonucleoprotein granule;	GO:0003774//cytoskeletal motor activity;GO:0005515//protein binding;GO:0005524//ATP binding;GO:0051015//actin filament binding;	-
MSTRG.100274	ENSBGRG00000020506	MSTRG.100274.1	93701	19[-]38176491-38178265	19[-]38075727-38082790	ADPRM	GO:0016787;GO:0016787;	K01517	ADP-ribose/CDP-alcohol diphosphatase, manganese dependent [Source:HGNC Symbol;Acc:HGNC:30925]	sp|A7YY53|ADPRM_BOVIN Manganese-dependent ADP-ribose/CDP-alcohol diphosphatase OS=Bos taurus OX=9913 GN=ADPRM PE=2 SV=2	veNOG13462	F	-	-	GO:0016787//hydrolase activity;GO:0016787//hydrolase activity;	ko00564(Glycerophospholipid metabolism);ko00230(Purine metabolism)
MSTRG.100274	ENSBGRG00000020872	MSTRG.100274.1	49550	19[-]38176491-38178265	19[+]38227815-38258374	MYH2	GO:0003774;GO:0005515;GO:0005524;GO:0005911;GO:0006936;GO:0016459;GO:0030016;GO:0032991;GO:0051015;GO:0003774;GO:0005524;GO:0016459;GO:0051015;	K24220	myosin heavy chain 2 [Source:HGNC Symbol;Acc:HGNC:7572]	sp|Q9BE41|MYH2_BOVIN Myosin-2 OS=Bos taurus OX=9913 GN=MYH2 PE=2 SV=1	COG5022;veNOG00003	Z	GO:0006936//muscle contraction;	GO:0005911//cell-cell junction;GO:0016459//myosin complex;GO:0030016//myofibril;GO:0032991//protein-containing complex;GO:0016459//myosin complex;	GO:0003774//cytoskeletal motor activity;GO:0005515//protein binding;GO:0005524//ATP binding;GO:0051015//actin filament binding;GO:0003774//cytoskeletal motor activity;GO:0005524//ATP binding;GO:0051015//actin filament binding;	-
MSTRG.100274	ENSBGRG00000020553	MSTRG.100274.1	72713	19[-]38176491-38178265	19[+]38082061-38103778	SCO1	GO:0005739;GO:0030016;GO:0031305;GO:0033617;	K07152	SCO cytochrome c oxidase assembly protein 1 [Source:HGNC Symbol;Acc:HGNC:10603]	sp|A1A4J8|SCO1_BOVIN Protein SCO1 homolog, mitochondrial OS=Bos taurus OX=9913 GN=SCO1 PE=2 SV=1	veNOG14742	C	GO:0033617//mitochondrial cytochrome c oxidase assembly;	GO:0005739//mitochondrion;GO:0030016//myofibril;GO:0031305//integral component of mitochondrial inner membrane;	-	-
MSTRG.100278	ENSBGRG00000026601	MSTRG.100278.13,MSTRG.100278.12	10161	19[+]38783979-38787143	19[+]38797304-38806093	RCVRN	GO:0005509;GO:0005509;GO:0007601;GO:0007602;GO:0051924;	K13764	recoverin [Source:HGNC Symbol;Acc:HGNC:9937]	sp|P21457|RECO_BOVIN Recoverin OS=Bos taurus OX=9913 GN=RCVRN PE=1 SV=3	COG5126;veNOG03554	TZD	GO:0007601//visual perception;GO:0007602//phototransduction;GO:0051924//regulation of calcium ion transport;	-	GO:0005509//calcium ion binding;GO:0005509//calcium ion binding;	ko04744(Phototransduction)
MSTRG.100278	ENSBGRG00000026607	MSTRG.100278.13,MSTRG.100278.12	24172	19[+]38783979-38787143	19[-]38811315-38869305	GLP2R	GO:0004888;GO:0004930;GO:0007166;GO:0007186;GO:0016020;GO:0016021;GO:0004888;GO:0004930;GO:0007166;GO:0007186;GO:0016020;GO:0016021;GO:0004888;GO:0004930;GO:0007166;GO:0007186;GO:0016020;GO:0016021;	K04582	glucagon like peptide 2 receptor [Source:HGNC Symbol;Acc:HGNC:4325]	sp|O95838|GLP2R_HUMAN Glucagon-like peptide 2 receptor OS=Homo sapiens OX=9606 GN=GLP2R PE=1 SV=1	veNOG11521	T	GO:0007166//cell surface receptor signaling pathway;GO:0007186//G protein-coupled receptor signaling pathway;GO:0007166//cell surface receptor signaling pathway;GO:0007186//G protein-coupled receptor signaling pathway;GO:0007166//cell surface receptor signaling pathway;GO:0007186//G protein-coupled receptor signaling pathway;	GO:0016020//membrane;GO:0016021//integral component of membrane;GO:0016020//membrane;GO:0016021//integral component of membrane;GO:0016020//membrane;GO:0016021//integral component of membrane;	GO:0004888//transmembrane signaling receptor activity;GO:0004930//G protein-coupled receptor activity;GO:0004888//transmembrane signaling receptor activity;GO:0004930//G protein-coupled receptor activity;GO:0004888//transmembrane signaling receptor activity;GO:0004930//G protein-coupled receptor activity;	ko04080(Neuroactive ligand-receptor interaction)
MSTRG.100278	ENSBGRG00000026616	MSTRG.100278.13,MSTRG.100278.12	78503	19[+]38783979-38787143	19[+]38865646-38873634	GSG1L2	-	-	GSG1 like 2 [Source:HGNC Symbol;Acc:HGNC:51826]	sp|A8MUP6|GS1L2_HUMAN Germ cell-specific gene 1-like protein 2 OS=Homo sapiens OX=9606 GN=GSG1L2 PE=3 SV=3	veNOG07815	S	-	-	-	-
MSTRG.100278	ENSBGRG00000026619	MSTRG.100278.13,MSTRG.100278.12	89467	19[+]38783979-38787143	19[+]38876610-38893321	DHRS7C	GO:0016491;GO:0016491;GO:0004745;GO:0006874;GO:0010880;GO:0014801;GO:0016491;GO:0033017;GO:0046323;	K11167	dehydrogenase/reductase 7C [Source:HGNC Symbol;Acc:HGNC:32423]	sp|Q1RMJ5|DRS7C_BOVIN Dehydrogenase/reductase SDR family member 7C OS=Bos taurus OX=9913 GN=DHRS7C PE=2 SV=2	veNOG04804	Q	GO:0006874//cellular calcium ion homeostasis;GO:0010880//regulation of release of sequestered calcium ion into cytosol by sarcoplasmic reticulum;GO:0046323//glucose import;	GO:0014801//longitudinal sarcoplasmic reticulum;GO:0033017//sarcoplasmic reticulum membrane;	GO:0016491//oxidoreductase activity;GO:0016491//oxidoreductase activity;GO:0004745//NAD-retinol dehydrogenase activity;GO:0016491//oxidoreductase activity;	-
MSTRG.100278	ENSBGRG00000026582	MSTRG.100278.13,MSTRG.100278.12	499	19[+]38783979-38787143	19[+]38549220-38783480	GAS7	GO:0005515;GO:0005515;GO:0005515;GO:0005515;GO:0005515;GO:0005515;GO:0005515;GO:0005515;GO:0005515;	K18618	growth arrest specific 7 [Source:HGNC Symbol;Acc:HGNC:4169]	sp|O60861|GAS7_HUMAN Growth arrest-specific protein 7 OS=Homo sapiens OX=9606 GN=GAS7 PE=1 SV=3	veNOG04425	Z	-	-	GO:0005515//protein binding;GO:0005515//protein binding;GO:0005515//protein binding;GO:0005515//protein binding;GO:0005515//protein binding;GO:0005515//protein binding;GO:0005515//protein binding;GO:0005515//protein binding;GO:0005515//protein binding;	-
MSTRG.100279	ENSBGRG00000026582	MSTRG.100279.1	0	19[+]38564458-38566947	19[+]38549220-38783480	GAS7	GO:0005515;GO:0005515;GO:0005515;GO:0005515;GO:0005515;GO:0005515;GO:0005515;GO:0005515;GO:0005515;	K18618	growth arrest specific 7 [Source:HGNC Symbol;Acc:HGNC:4169]	sp|O60861|GAS7_HUMAN Growth arrest-specific protein 7 OS=Homo sapiens OX=9606 GN=GAS7 PE=1 SV=3	veNOG04425	Z	-	-	GO:0005515//protein binding;GO:0005515//protein binding;GO:0005515//protein binding;GO:0005515//protein binding;GO:0005515//protein binding;GO:0005515//protein binding;GO:0005515//protein binding;GO:0005515//protein binding;GO:0005515//protein binding;	-
MSTRG.100280	ENSBGRG00000026582	MSTRG.100280.2,MSTRG.100280.1	0	19[+]38591761-38593010	19[+]38549220-38783480	GAS7	GO:0005515;GO:0005515;GO:0005515;GO:0005515;GO:0005515;GO:0005515;GO:0005515;GO:0005515;GO:0005515;	K18618	growth arrest specific 7 [Source:HGNC Symbol;Acc:HGNC:4169]	sp|O60861|GAS7_HUMAN Growth arrest-specific protein 7 OS=Homo sapiens OX=9606 GN=GAS7 PE=1 SV=3	veNOG04425	Z	-	-	GO:0005515//protein binding;GO:0005515//protein binding;GO:0005515//protein binding;GO:0005515//protein binding;GO:0005515//protein binding;GO:0005515//protein binding;GO:0005515//protein binding;GO:0005515//protein binding;GO:0005515//protein binding;	-
MSTRG.100281	ENSBGRG00000026582	MSTRG.100281.1	0	19[+]38610411-38611985	19[+]38549220-38783480	GAS7	GO:0005515;GO:0005515;GO:0005515;GO:0005515;GO:0005515;GO:0005515;GO:0005515;GO:0005515;GO:0005515;	K18618	growth arrest specific 7 [Source:HGNC Symbol;Acc:HGNC:4169]	sp|O60861|GAS7_HUMAN Growth arrest-specific protein 7 OS=Homo sapiens OX=9606 GN=GAS7 PE=1 SV=3	veNOG04425	Z	-	-	GO:0005515//protein binding;GO:0005515//protein binding;GO:0005515//protein binding;GO:0005515//protein binding;GO:0005515//protein binding;GO:0005515//protein binding;GO:0005515//protein binding;GO:0005515//protein binding;GO:0005515//protein binding;	-
MSTRG.100282	ENSBGRG00000026582	MSTRG.100282.1	0	19[+]38617735-38619161	19[+]38549220-38783480	GAS7	GO:0005515;GO:0005515;GO:0005515;GO:0005515;GO:0005515;GO:0005515;GO:0005515;GO:0005515;GO:0005515;	K18618	growth arrest specific 7 [Source:HGNC Symbol;Acc:HGNC:4169]	sp|O60861|GAS7_HUMAN Growth arrest-specific protein 7 OS=Homo sapiens OX=9606 GN=GAS7 PE=1 SV=3	veNOG04425	Z	-	-	GO:0005515//protein binding;GO:0005515//protein binding;GO:0005515//protein binding;GO:0005515//protein binding;GO:0005515//protein binding;GO:0005515//protein binding;GO:0005515//protein binding;GO:0005515//protein binding;GO:0005515//protein binding;	-
MSTRG.100284	ENSBGRG00000026582	MSTRG.100284.1	0	19[+]38646828-38647593	19[+]38549220-38783480	GAS7	GO:0005515;GO:0005515;GO:0005515;GO:0005515;GO:0005515;GO:0005515;GO:0005515;GO:0005515;GO:0005515;	K18618	growth arrest specific 7 [Source:HGNC Symbol;Acc:HGNC:4169]	sp|O60861|GAS7_HUMAN Growth arrest-specific protein 7 OS=Homo sapiens OX=9606 GN=GAS7 PE=1 SV=3	veNOG04425	Z	-	-	GO:0005515//protein binding;GO:0005515//protein binding;GO:0005515//protein binding;GO:0005515//protein binding;GO:0005515//protein binding;GO:0005515//protein binding;GO:0005515//protein binding;GO:0005515//protein binding;GO:0005515//protein binding;	-
MSTRG.100285	ENSBGRG00000026582	MSTRG.100285.1	0	19[+]38668744-38670017	19[+]38549220-38783480	GAS7	GO:0005515;GO:0005515;GO:0005515;GO:0005515;GO:0005515;GO:0005515;GO:0005515;GO:0005515;GO:0005515;	K18618	growth arrest specific 7 [Source:HGNC Symbol;Acc:HGNC:4169]	sp|O60861|GAS7_HUMAN Growth arrest-specific protein 7 OS=Homo sapiens OX=9606 GN=GAS7 PE=1 SV=3	veNOG04425	Z	-	-	GO:0005515//protein binding;GO:0005515//protein binding;GO:0005515//protein binding;GO:0005515//protein binding;GO:0005515//protein binding;GO:0005515//protein binding;GO:0005515//protein binding;GO:0005515//protein binding;GO:0005515//protein binding;	-
MSTRG.100286	ENSBGRG00000026582	MSTRG.100286.1	0	19[+]38677471-38678536	19[+]38549220-38783480	GAS7	GO:0005515;GO:0005515;GO:0005515;GO:0005515;GO:0005515;GO:0005515;GO:0005515;GO:0005515;GO:0005515;	K18618	growth arrest specific 7 [Source:HGNC Symbol;Acc:HGNC:4169]	sp|O60861|GAS7_HUMAN Growth arrest-specific protein 7 OS=Homo sapiens OX=9606 GN=GAS7 PE=1 SV=3	veNOG04425	Z	-	-	GO:0005515//protein binding;GO:0005515//protein binding;GO:0005515//protein binding;GO:0005515//protein binding;GO:0005515//protein binding;GO:0005515//protein binding;GO:0005515//protein binding;GO:0005515//protein binding;GO:0005515//protein binding;	-
MSTRG.100287	ENSBGRG00000026601	MSTRG.100287.1,MSTRG.100287.2	96767	19[+]38698676-38700537	19[+]38797304-38806093	RCVRN	GO:0005509;GO:0005509;GO:0007601;GO:0007602;GO:0051924;	K13764	recoverin [Source:HGNC Symbol;Acc:HGNC:9937]	sp|P21457|RECO_BOVIN Recoverin OS=Bos taurus OX=9913 GN=RCVRN PE=1 SV=3	COG5126;veNOG03554	TZD	GO:0007601//visual perception;GO:0007602//phototransduction;GO:0051924//regulation of calcium ion transport;	-	GO:0005509//calcium ion binding;GO:0005509//calcium ion binding;	ko04744(Phototransduction)
MSTRG.100287	ENSBGRG00000026582	MSTRG.100287.1,MSTRG.100287.2	0	19[+]38698676-38700537	19[+]38549220-38783480	GAS7	GO:0005515;GO:0005515;GO:0005515;GO:0005515;GO:0005515;GO:0005515;GO:0005515;GO:0005515;GO:0005515;	K18618	growth arrest specific 7 [Source:HGNC Symbol;Acc:HGNC:4169]	sp|O60861|GAS7_HUMAN Growth arrest-specific protein 7 OS=Homo sapiens OX=9606 GN=GAS7 PE=1 SV=3	veNOG04425	Z	-	-	GO:0005515//protein binding;GO:0005515//protein binding;GO:0005515//protein binding;GO:0005515//protein binding;GO:0005515//protein binding;GO:0005515//protein binding;GO:0005515//protein binding;GO:0005515//protein binding;GO:0005515//protein binding;	-
MSTRG.100288	ENSBGRG00000026601	MSTRG.100288.1	9641	19[+]38785729-38787663	19[+]38797304-38806093	RCVRN	GO:0005509;GO:0005509;GO:0007601;GO:0007602;GO:0051924;	K13764	recoverin [Source:HGNC Symbol;Acc:HGNC:9937]	sp|P21457|RECO_BOVIN Recoverin OS=Bos taurus OX=9913 GN=RCVRN PE=1 SV=3	COG5126;veNOG03554	TZD	GO:0007601//visual perception;GO:0007602//phototransduction;GO:0051924//regulation of calcium ion transport;	-	GO:0005509//calcium ion binding;GO:0005509//calcium ion binding;	ko04744(Phototransduction)
MSTRG.100288	ENSBGRG00000026607	MSTRG.100288.1	23652	19[+]38785729-38787663	19[-]38811315-38869305	GLP2R	GO:0004888;GO:0004930;GO:0007166;GO:0007186;GO:0016020;GO:0016021;GO:0004888;GO:0004930;GO:0007166;GO:0007186;GO:0016020;GO:0016021;GO:0004888;GO:0004930;GO:0007166;GO:0007186;GO:0016020;GO:0016021;	K04582	glucagon like peptide 2 receptor [Source:HGNC Symbol;Acc:HGNC:4325]	sp|O95838|GLP2R_HUMAN Glucagon-like peptide 2 receptor OS=Homo sapiens OX=9606 GN=GLP2R PE=1 SV=1	veNOG11521	T	GO:0007166//cell surface receptor signaling pathway;GO:0007186//G protein-coupled receptor signaling pathway;GO:0007166//cell surface receptor signaling pathway;GO:0007186//G protein-coupled receptor signaling pathway;GO:0007166//cell surface receptor signaling pathway;GO:0007186//G protein-coupled receptor signaling pathway;	GO:0016020//membrane;GO:0016021//integral component of membrane;GO:0016020//membrane;GO:0016021//integral component of membrane;GO:0016020//membrane;GO:0016021//integral component of membrane;	GO:0004888//transmembrane signaling receptor activity;GO:0004930//G protein-coupled receptor activity;GO:0004888//transmembrane signaling receptor activity;GO:0004930//G protein-coupled receptor activity;GO:0004888//transmembrane signaling receptor activity;GO:0004930//G protein-coupled receptor activity;	ko04080(Neuroactive ligand-receptor interaction)
MSTRG.100288	ENSBGRG00000026616	MSTRG.100288.1	77983	19[+]38785729-38787663	19[+]38865646-38873634	GSG1L2	-	-	GSG1 like 2 [Source:HGNC Symbol;Acc:HGNC:51826]	sp|A8MUP6|GS1L2_HUMAN Germ cell-specific gene 1-like protein 2 OS=Homo sapiens OX=9606 GN=GSG1L2 PE=3 SV=3	veNOG07815	S	-	-	-	-
MSTRG.100288	ENSBGRG00000026619	MSTRG.100288.1	88947	19[+]38785729-38787663	19[+]38876610-38893321	DHRS7C	GO:0016491;GO:0016491;GO:0004745;GO:0006874;GO:0010880;GO:0014801;GO:0016491;GO:0033017;GO:0046323;	K11167	dehydrogenase/reductase 7C [Source:HGNC Symbol;Acc:HGNC:32423]	sp|Q1RMJ5|DRS7C_BOVIN Dehydrogenase/reductase SDR family member 7C OS=Bos taurus OX=9913 GN=DHRS7C PE=2 SV=2	veNOG04804	Q	GO:0006874//cellular calcium ion homeostasis;GO:0010880//regulation of release of sequestered calcium ion into cytosol by sarcoplasmic reticulum;GO:0046323//glucose import;	GO:0014801//longitudinal sarcoplasmic reticulum;GO:0033017//sarcoplasmic reticulum membrane;	GO:0016491//oxidoreductase activity;GO:0016491//oxidoreductase activity;GO:0004745//NAD-retinol dehydrogenase activity;GO:0016491//oxidoreductase activity;	-
MSTRG.100288	ENSBGRG00000026582	MSTRG.100288.1	2249	19[+]38785729-38787663	19[+]38549220-38783480	GAS7	GO:0005515;GO:0005515;GO:0005515;GO:0005515;GO:0005515;GO:0005515;GO:0005515;GO:0005515;GO:0005515;	K18618	growth arrest specific 7 [Source:HGNC Symbol;Acc:HGNC:4169]	sp|O60861|GAS7_HUMAN Growth arrest-specific protein 7 OS=Homo sapiens OX=9606 GN=GAS7 PE=1 SV=3	veNOG04425	Z	-	-	GO:0005515//protein binding;GO:0005515//protein binding;GO:0005515//protein binding;GO:0005515//protein binding;GO:0005515//protein binding;GO:0005515//protein binding;GO:0005515//protein binding;GO:0005515//protein binding;GO:0005515//protein binding;	-
MSTRG.100293	ENSBGRG00000026601	MSTRG.100293.11	96060	19[+]38902153-38903715	19[+]38797304-38806093	RCVRN	GO:0005509;GO:0005509;GO:0007601;GO:0007602;GO:0051924;	K13764	recoverin [Source:HGNC Symbol;Acc:HGNC:9937]	sp|P21457|RECO_BOVIN Recoverin OS=Bos taurus OX=9913 GN=RCVRN PE=1 SV=3	COG5126;veNOG03554	TZD	GO:0007601//visual perception;GO:0007602//phototransduction;GO:0051924//regulation of calcium ion transport;	-	GO:0005509//calcium ion binding;GO:0005509//calcium ion binding;	ko04744(Phototransduction)
MSTRG.100293	ENSBGRG00000026607	MSTRG.100293.11	32848	19[+]38902153-38903715	19[-]38811315-38869305	GLP2R	GO:0004888;GO:0004930;GO:0007166;GO:0007186;GO:0016020;GO:0016021;GO:0004888;GO:0004930;GO:0007166;GO:0007186;GO:0016020;GO:0016021;GO:0004888;GO:0004930;GO:0007166;GO:0007186;GO:0016020;GO:0016021;	K04582	glucagon like peptide 2 receptor [Source:HGNC Symbol;Acc:HGNC:4325]	sp|O95838|GLP2R_HUMAN Glucagon-like peptide 2 receptor OS=Homo sapiens OX=9606 GN=GLP2R PE=1 SV=1	veNOG11521	T	GO:0007166//cell surface receptor signaling pathway;GO:0007186//G protein-coupled receptor signaling pathway;GO:0007166//cell surface receptor signaling pathway;GO:0007186//G protein-coupled receptor signaling pathway;GO:0007166//cell surface receptor signaling pathway;GO:0007186//G protein-coupled receptor signaling pathway;	GO:0016020//membrane;GO:0016021//integral component of membrane;GO:0016020//membrane;GO:0016021//integral component of membrane;GO:0016020//membrane;GO:0016021//integral component of membrane;	GO:0004888//transmembrane signaling receptor activity;GO:0004930//G protein-coupled receptor activity;GO:0004888//transmembrane signaling receptor activity;GO:0004930//G protein-coupled receptor activity;GO:0004888//transmembrane signaling receptor activity;GO:0004930//G protein-coupled receptor activity;	ko04080(Neuroactive ligand-receptor interaction)
MSTRG.100293	ENSBGRG00000026616	MSTRG.100293.11	28519	19[+]38902153-38903715	19[+]38865646-38873634	GSG1L2	-	-	GSG1 like 2 [Source:HGNC Symbol;Acc:HGNC:51826]	sp|A8MUP6|GS1L2_HUMAN Germ cell-specific gene 1-like protein 2 OS=Homo sapiens OX=9606 GN=GSG1L2 PE=3 SV=3	veNOG07815	S	-	-	-	-
MSTRG.100293	ENSBGRG00000026628	MSTRG.100293.11	0	19[+]38902153-38903715	19[-]38903337-38955768	USP43	GO:0004843;GO:0006511;GO:0016579;GO:0004843;GO:0006511;GO:0016579;GO:0004843;GO:0006511;GO:0016579;	K11856	ubiquitin specific peptidase 43 [Source:HGNC Symbol;Acc:HGNC:20072]	sp|Q70EL4|UBP43_HUMAN Ubiquitin carboxyl-terminal hydrolase 43 OS=Homo sapiens OX=9606 GN=USP43 PE=1 SV=2	veNOG00756	O	GO:0006511//ubiquitin-dependent protein catabolic process;GO:0016579//protein deubiquitination;GO:0006511//ubiquitin-dependent protein catabolic process;GO:0016579//protein deubiquitination;GO:0006511//ubiquitin-dependent protein catabolic process;GO:0016579//protein deubiquitination;	-	GO:0004843//thiol-dependent deubiquitinase;GO:0004843//thiol-dependent deubiquitinase;GO:0004843//thiol-dependent deubiquitinase;	-
MSTRG.100293	ENSBGRG00000026619	MSTRG.100293.11	8832	19[+]38902153-38903715	19[+]38876610-38893321	DHRS7C	GO:0016491;GO:0016491;GO:0004745;GO:0006874;GO:0010880;GO:0014801;GO:0016491;GO:0033017;GO:0046323;	K11167	dehydrogenase/reductase 7C [Source:HGNC Symbol;Acc:HGNC:32423]	sp|Q1RMJ5|DRS7C_BOVIN Dehydrogenase/reductase SDR family member 7C OS=Bos taurus OX=9913 GN=DHRS7C PE=2 SV=2	veNOG04804	Q	GO:0006874//cellular calcium ion homeostasis;GO:0010880//regulation of release of sequestered calcium ion into cytosol by sarcoplasmic reticulum;GO:0046323//glucose import;	GO:0014801//longitudinal sarcoplasmic reticulum;GO:0033017//sarcoplasmic reticulum membrane;	GO:0016491//oxidoreductase activity;GO:0016491//oxidoreductase activity;GO:0004745//NAD-retinol dehydrogenase activity;GO:0016491//oxidoreductase activity;	-
MSTRG.100293	ENSBGRG00000026641	MSTRG.100293.11	53550	19[+]38902153-38903715	19[-]38957265-38990097	CFAP52	GO:0005515;GO:0005930;GO:0030317;GO:0061966;GO:0097729;GO:0005515;	K24728	cilia and flagella associated protein 52 [Source:HGNC Symbol;Acc:HGNC:16053]	sp|Q8N1V2|CFA52_HUMAN Cilia- and flagella-associated protein 52 OS=Homo sapiens OX=9606 GN=CFAP52 PE=1 SV=3	veNOG11199	R	GO:0030317//flagellated sperm motility;GO:0061966//establishment of left/right asymmetry;	GO:0005930//axoneme;GO:0097729//9+2 motile cilium;	GO:0005515//protein binding;GO:0005515//protein binding;	-
MSTRG.100293	ENSBGRG00000026647	MSTRG.100293.11	86403	19[+]38902153-38903715	19[+]38990118-39234905	STX8	GO:0005768;GO:0005769;GO:0005770;GO:0005802;GO:0019869;GO:0019905;GO:0031625;GO:0031982;GO:0045022;GO:0045335;GO:0048471;GO:0055037;GO:0071346;GO:1903076;	K08501	syntaxin 8 [Source:HGNC Symbol;Acc:HGNC:11443]	sp|Q3T075|STX8_BOVIN Syntaxin-8 OS=Bos taurus OX=9913 GN=STX8 PE=2 SV=1	veNOG06677	U	GO:0045022//early endosome to late endosome transport;GO:0071346//cellular response to interferon-gamma;GO:1903076//regulation of protein localization to plasma membrane;	GO:0005768//endosome;GO:0005769//early endosome;GO:0005770//late endosome;GO:0005802//trans-Golgi network;GO:0031982//vesicle;GO:0045335//phagocytic vesicle;GO:0048471//perinuclear region of cytoplasm;GO:0055037//recycling endosome;	GO:0019869//chloride channel inhibitor activity;GO:0019905//syntaxin binding;GO:0031625//ubiquitin protein ligase binding;	ko04130(SNARE interactions in vesicular transport)
MSTRG.100294	ENSBGRG00000026601	MSTRG.100294.1	78789	19[+]38884882-38886194	19[+]38797304-38806093	RCVRN	GO:0005509;GO:0005509;GO:0007601;GO:0007602;GO:0051924;	K13764	recoverin [Source:HGNC Symbol;Acc:HGNC:9937]	sp|P21457|RECO_BOVIN Recoverin OS=Bos taurus OX=9913 GN=RCVRN PE=1 SV=3	COG5126;veNOG03554	TZD	GO:0007601//visual perception;GO:0007602//phototransduction;GO:0051924//regulation of calcium ion transport;	-	GO:0005509//calcium ion binding;GO:0005509//calcium ion binding;	ko04744(Phototransduction)
MSTRG.100294	ENSBGRG00000026607	MSTRG.100294.1	15577	19[+]38884882-38886194	19[-]38811315-38869305	GLP2R	GO:0004888;GO:0004930;GO:0007166;GO:0007186;GO:0016020;GO:0016021;GO:0004888;GO:0004930;GO:0007166;GO:0007186;GO:0016020;GO:0016021;GO:0004888;GO:0004930;GO:0007166;GO:0007186;GO:0016020;GO:0016021;	K04582	glucagon like peptide 2 receptor [Source:HGNC Symbol;Acc:HGNC:4325]	sp|O95838|GLP2R_HUMAN Glucagon-like peptide 2 receptor OS=Homo sapiens OX=9606 GN=GLP2R PE=1 SV=1	veNOG11521	T	GO:0007166//cell surface receptor signaling pathway;GO:0007186//G protein-coupled receptor signaling pathway;GO:0007166//cell surface receptor signaling pathway;GO:0007186//G protein-coupled receptor signaling pathway;GO:0007166//cell surface receptor signaling pathway;GO:0007186//G protein-coupled receptor signaling pathway;	GO:0016020//membrane;GO:0016021//integral component of membrane;GO:0016020//membrane;GO:0016021//integral component of membrane;GO:0016020//membrane;GO:0016021//integral component of membrane;	GO:0004888//transmembrane signaling receptor activity;GO:0004930//G protein-coupled receptor activity;GO:0004888//transmembrane signaling receptor activity;GO:0004930//G protein-coupled receptor activity;GO:0004888//transmembrane signaling receptor activity;GO:0004930//G protein-coupled receptor activity;	ko04080(Neuroactive ligand-receptor interaction)
MSTRG.100294	ENSBGRG00000026616	MSTRG.100294.1	11248	19[+]38884882-38886194	19[+]38865646-38873634	GSG1L2	-	-	GSG1 like 2 [Source:HGNC Symbol;Acc:HGNC:51826]	sp|A8MUP6|GS1L2_HUMAN Germ cell-specific gene 1-like protein 2 OS=Homo sapiens OX=9606 GN=GSG1L2 PE=3 SV=3	veNOG07815	S	-	-	-	-
MSTRG.100294	ENSBGRG00000026628	MSTRG.100294.1	17143	19[+]38884882-38886194	19[-]38903337-38955768	USP43	GO:0004843;GO:0006511;GO:0016579;GO:0004843;GO:0006511;GO:0016579;GO:0004843;GO:0006511;GO:0016579;	K11856	ubiquitin specific peptidase 43 [Source:HGNC Symbol;Acc:HGNC:20072]	sp|Q70EL4|UBP43_HUMAN Ubiquitin carboxyl-terminal hydrolase 43 OS=Homo sapiens OX=9606 GN=USP43 PE=1 SV=2	veNOG00756	O	GO:0006511//ubiquitin-dependent protein catabolic process;GO:0016579//protein deubiquitination;GO:0006511//ubiquitin-dependent protein catabolic process;GO:0016579//protein deubiquitination;GO:0006511//ubiquitin-dependent protein catabolic process;GO:0016579//protein deubiquitination;	-	GO:0004843//thiol-dependent deubiquitinase;GO:0004843//thiol-dependent deubiquitinase;GO:0004843//thiol-dependent deubiquitinase;	-
MSTRG.100294	ENSBGRG00000026619	MSTRG.100294.1	0	19[+]38884882-38886194	19[+]38876610-38893321	DHRS7C	GO:0016491;GO:0016491;GO:0004745;GO:0006874;GO:0010880;GO:0014801;GO:0016491;GO:0033017;GO:0046323;	K11167	dehydrogenase/reductase 7C [Source:HGNC Symbol;Acc:HGNC:32423]	sp|Q1RMJ5|DRS7C_BOVIN Dehydrogenase/reductase SDR family member 7C OS=Bos taurus OX=9913 GN=DHRS7C PE=2 SV=2	veNOG04804	Q	GO:0006874//cellular calcium ion homeostasis;GO:0010880//regulation of release of sequestered calcium ion into cytosol by sarcoplasmic reticulum;GO:0046323//glucose import;	GO:0014801//longitudinal sarcoplasmic reticulum;GO:0033017//sarcoplasmic reticulum membrane;	GO:0016491//oxidoreductase activity;GO:0016491//oxidoreductase activity;GO:0004745//NAD-retinol dehydrogenase activity;GO:0016491//oxidoreductase activity;	-
MSTRG.100294	ENSBGRG00000026641	MSTRG.100294.1	71071	19[+]38884882-38886194	19[-]38957265-38990097	CFAP52	GO:0005515;GO:0005930;GO:0030317;GO:0061966;GO:0097729;GO:0005515;	K24728	cilia and flagella associated protein 52 [Source:HGNC Symbol;Acc:HGNC:16053]	sp|Q8N1V2|CFA52_HUMAN Cilia- and flagella-associated protein 52 OS=Homo sapiens OX=9606 GN=CFAP52 PE=1 SV=3	veNOG11199	R	GO:0030317//flagellated sperm motility;GO:0061966//establishment of left/right asymmetry;	GO:0005930//axoneme;GO:0097729//9+2 motile cilium;	GO:0005515//protein binding;GO:0005515//protein binding;	-
MSTRG.100295	ENSBGRG00000026601	MSTRG.100295.1	83017	19[+]38889110-38890625	19[+]38797304-38806093	RCVRN	GO:0005509;GO:0005509;GO:0007601;GO:0007602;GO:0051924;	K13764	recoverin [Source:HGNC Symbol;Acc:HGNC:9937]	sp|P21457|RECO_BOVIN Recoverin OS=Bos taurus OX=9913 GN=RCVRN PE=1 SV=3	COG5126;veNOG03554	TZD	GO:0007601//visual perception;GO:0007602//phototransduction;GO:0051924//regulation of calcium ion transport;	-	GO:0005509//calcium ion binding;GO:0005509//calcium ion binding;	ko04744(Phototransduction)
MSTRG.100295	ENSBGRG00000026607	MSTRG.100295.1	19805	19[+]38889110-38890625	19[-]38811315-38869305	GLP2R	GO:0004888;GO:0004930;GO:0007166;GO:0007186;GO:0016020;GO:0016021;GO:0004888;GO:0004930;GO:0007166;GO:0007186;GO:0016020;GO:0016021;GO:0004888;GO:0004930;GO:0007166;GO:0007186;GO:0016020;GO:0016021;	K04582	glucagon like peptide 2 receptor [Source:HGNC Symbol;Acc:HGNC:4325]	sp|O95838|GLP2R_HUMAN Glucagon-like peptide 2 receptor OS=Homo sapiens OX=9606 GN=GLP2R PE=1 SV=1	veNOG11521	T	GO:0007166//cell surface receptor signaling pathway;GO:0007186//G protein-coupled receptor signaling pathway;GO:0007166//cell surface receptor signaling pathway;GO:0007186//G protein-coupled receptor signaling pathway;GO:0007166//cell surface receptor signaling pathway;GO:0007186//G protein-coupled receptor signaling pathway;	GO:0016020//membrane;GO:0016021//integral component of membrane;GO:0016020//membrane;GO:0016021//integral component of membrane;GO:0016020//membrane;GO:0016021//integral component of membrane;	GO:0004888//transmembrane signaling receptor activity;GO:0004930//G protein-coupled receptor activity;GO:0004888//transmembrane signaling receptor activity;GO:0004930//G protein-coupled receptor activity;GO:0004888//transmembrane signaling receptor activity;GO:0004930//G protein-coupled receptor activity;	ko04080(Neuroactive ligand-receptor interaction)
MSTRG.100295	ENSBGRG00000026616	MSTRG.100295.1	15476	19[+]38889110-38890625	19[+]38865646-38873634	GSG1L2	-	-	GSG1 like 2 [Source:HGNC Symbol;Acc:HGNC:51826]	sp|A8MUP6|GS1L2_HUMAN Germ cell-specific gene 1-like protein 2 OS=Homo sapiens OX=9606 GN=GSG1L2 PE=3 SV=3	veNOG07815	S	-	-	-	-
MSTRG.100295	ENSBGRG00000026628	MSTRG.100295.1	12712	19[+]38889110-38890625	19[-]38903337-38955768	USP43	GO:0004843;GO:0006511;GO:0016579;GO:0004843;GO:0006511;GO:0016579;GO:0004843;GO:0006511;GO:0016579;	K11856	ubiquitin specific peptidase 43 [Source:HGNC Symbol;Acc:HGNC:20072]	sp|Q70EL4|UBP43_HUMAN Ubiquitin carboxyl-terminal hydrolase 43 OS=Homo sapiens OX=9606 GN=USP43 PE=1 SV=2	veNOG00756	O	GO:0006511//ubiquitin-dependent protein catabolic process;GO:0016579//protein deubiquitination;GO:0006511//ubiquitin-dependent protein catabolic process;GO:0016579//protein deubiquitination;GO:0006511//ubiquitin-dependent protein catabolic process;GO:0016579//protein deubiquitination;	-	GO:0004843//thiol-dependent deubiquitinase;GO:0004843//thiol-dependent deubiquitinase;GO:0004843//thiol-dependent deubiquitinase;	-
MSTRG.100295	ENSBGRG00000026619	MSTRG.100295.1	0	19[+]38889110-38890625	19[+]38876610-38893321	DHRS7C	GO:0016491;GO:0016491;GO:0004745;GO:0006874;GO:0010880;GO:0014801;GO:0016491;GO:0033017;GO:0046323;	K11167	dehydrogenase/reductase 7C [Source:HGNC Symbol;Acc:HGNC:32423]	sp|Q1RMJ5|DRS7C_BOVIN Dehydrogenase/reductase SDR family member 7C OS=Bos taurus OX=9913 GN=DHRS7C PE=2 SV=2	veNOG04804	Q	GO:0006874//cellular calcium ion homeostasis;GO:0010880//regulation of release of sequestered calcium ion into cytosol by sarcoplasmic reticulum;GO:0046323//glucose import;	GO:0014801//longitudinal sarcoplasmic reticulum;GO:0033017//sarcoplasmic reticulum membrane;	GO:0016491//oxidoreductase activity;GO:0016491//oxidoreductase activity;GO:0004745//NAD-retinol dehydrogenase activity;GO:0016491//oxidoreductase activity;	-
MSTRG.100295	ENSBGRG00000026641	MSTRG.100295.1	66640	19[+]38889110-38890625	19[-]38957265-38990097	CFAP52	GO:0005515;GO:0005930;GO:0030317;GO:0061966;GO:0097729;GO:0005515;	K24728	cilia and flagella associated protein 52 [Source:HGNC Symbol;Acc:HGNC:16053]	sp|Q8N1V2|CFA52_HUMAN Cilia- and flagella-associated protein 52 OS=Homo sapiens OX=9606 GN=CFAP52 PE=1 SV=3	veNOG11199	R	GO:0030317//flagellated sperm motility;GO:0061966//establishment of left/right asymmetry;	GO:0005930//axoneme;GO:0097729//9+2 motile cilium;	GO:0005515//protein binding;GO:0005515//protein binding;	-
MSTRG.100295	ENSBGRG00000026647	MSTRG.100295.1	99493	19[+]38889110-38890625	19[+]38990118-39234905	STX8	GO:0005768;GO:0005769;GO:0005770;GO:0005802;GO:0019869;GO:0019905;GO:0031625;GO:0031982;GO:0045022;GO:0045335;GO:0048471;GO:0055037;GO:0071346;GO:1903076;	K08501	syntaxin 8 [Source:HGNC Symbol;Acc:HGNC:11443]	sp|Q3T075|STX8_BOVIN Syntaxin-8 OS=Bos taurus OX=9913 GN=STX8 PE=2 SV=1	veNOG06677	U	GO:0045022//early endosome to late endosome transport;GO:0071346//cellular response to interferon-gamma;GO:1903076//regulation of protein localization to plasma membrane;	GO:0005768//endosome;GO:0005769//early endosome;GO:0005770//late endosome;GO:0005802//trans-Golgi network;GO:0031982//vesicle;GO:0045335//phagocytic vesicle;GO:0048471//perinuclear region of cytoplasm;GO:0055037//recycling endosome;	GO:0019869//chloride channel inhibitor activity;GO:0019905//syntaxin binding;GO:0031625//ubiquitin protein ligase binding;	ko04130(SNARE interactions in vesicular transport)
MSTRG.1003	ENSBGRG00000000037	MSTRG.1003.1	27072	1[-]17969410-17971007	1[+]17998079-18071143	CXADR	GO:0005178;GO:0005654;GO:0005737;GO:0005886;GO:0005911;GO:0005912;GO:0005923;GO:0007157;GO:0008013;GO:0010669;GO:0016323;GO:0016327;GO:0030054;GO:0030165;GO:0030593;GO:0031532;GO:0032991;GO:0045121;GO:0050839;GO:0070633;	K06788	CXADR Ig-like cell adhesion molecule [Source:HGNC Symbol;Acc:HGNC:2559]	sp|Q8WMV3|CXAR_BOVIN Coxsackievirus and adenovirus receptor homolog OS=Bos taurus OX=9913 GN=CXADR PE=2 SV=1	veNOG08870	T	GO:0007157//heterophilic cell-cell adhesion via plasma membrane cell adhesion molecules;GO:0010669//epithelial structure maintenance;GO:0030593//neutrophil chemotaxis;GO:0031532//actin cytoskeleton reorganization;GO:0070633//transepithelial transport;	GO:0005654//nucleoplasm;GO:0005737//cytoplasm;GO:0005886//plasma membrane;GO:0005911//cell-cell junction;GO:0005912//adherens junction;GO:0005923//bicellular tight junction;GO:0016323//basolateral plasma membrane;GO:0016327//apicolateral plasma membrane;GO:0030054//cell junction;GO:0032991//protein-containing complex;GO:0045121//membrane raft;	GO:0005178//integrin binding;GO:0008013//beta-catenin binding;GO:0030165//PDZ domain binding;GO:0050839//cell adhesion molecule binding;	ko05416(Viral myocarditis)
MSTRG.100306	ENSBGRG00000026649	MSTRG.100306.1	15042	19[+]39011903-39013911	19[-]39028953-39030179	-	-	-	-	sp|O00370|LORF2_HUMAN LINE-1 retrotransposable element ORF2 protein OS=Homo sapiens OX=9606 PE=1 SV=1	opiNOG45423;opiNOG04272;NOG145335;opiNOG50433	SR	-	-	-	-
MSTRG.100306	ENSBGRG00000026628	MSTRG.100306.1	56135	19[+]39011903-39013911	19[-]38903337-38955768	USP43	GO:0004843;GO:0006511;GO:0016579;GO:0004843;GO:0006511;GO:0016579;GO:0004843;GO:0006511;GO:0016579;	K11856	ubiquitin specific peptidase 43 [Source:HGNC Symbol;Acc:HGNC:20072]	sp|Q70EL4|UBP43_HUMAN Ubiquitin carboxyl-terminal hydrolase 43 OS=Homo sapiens OX=9606 GN=USP43 PE=1 SV=2	veNOG00756	O	GO:0006511//ubiquitin-dependent protein catabolic process;GO:0016579//protein deubiquitination;GO:0006511//ubiquitin-dependent protein catabolic process;GO:0016579//protein deubiquitination;GO:0006511//ubiquitin-dependent protein catabolic process;GO:0016579//protein deubiquitination;	-	GO:0004843//thiol-dependent deubiquitinase;GO:0004843//thiol-dependent deubiquitinase;GO:0004843//thiol-dependent deubiquitinase;	-
MSTRG.100306	ENSBGRG00000026641	MSTRG.100306.1	21806	19[+]39011903-39013911	19[-]38957265-38990097	CFAP52	GO:0005515;GO:0005930;GO:0030317;GO:0061966;GO:0097729;GO:0005515;	K24728	cilia and flagella associated protein 52 [Source:HGNC Symbol;Acc:HGNC:16053]	sp|Q8N1V2|CFA52_HUMAN Cilia- and flagella-associated protein 52 OS=Homo sapiens OX=9606 GN=CFAP52 PE=1 SV=3	veNOG11199	R	GO:0030317//flagellated sperm motility;GO:0061966//establishment of left/right asymmetry;	GO:0005930//axoneme;GO:0097729//9+2 motile cilium;	GO:0005515//protein binding;GO:0005515//protein binding;	-
MSTRG.100306	ENSBGRG00000026647	MSTRG.100306.1	0	19[+]39011903-39013911	19[+]38990118-39234905	STX8	GO:0005768;GO:0005769;GO:0005770;GO:0005802;GO:0019869;GO:0019905;GO:0031625;GO:0031982;GO:0045022;GO:0045335;GO:0048471;GO:0055037;GO:0071346;GO:1903076;	K08501	syntaxin 8 [Source:HGNC Symbol;Acc:HGNC:11443]	sp|Q3T075|STX8_BOVIN Syntaxin-8 OS=Bos taurus OX=9913 GN=STX8 PE=2 SV=1	veNOG06677	U	GO:0045022//early endosome to late endosome transport;GO:0071346//cellular response to interferon-gamma;GO:1903076//regulation of protein localization to plasma membrane;	GO:0005768//endosome;GO:0005769//early endosome;GO:0005770//late endosome;GO:0005802//trans-Golgi network;GO:0031982//vesicle;GO:0045335//phagocytic vesicle;GO:0048471//perinuclear region of cytoplasm;GO:0055037//recycling endosome;	GO:0019869//chloride channel inhibitor activity;GO:0019905//syntaxin binding;GO:0031625//ubiquitin protein ligase binding;	ko04130(SNARE interactions in vesicular transport)
MSTRG.100307	ENSBGRG00000026649	MSTRG.100307.1	10664	19[+]39017029-39018289	19[-]39028953-39030179	-	-	-	-	sp|O00370|LORF2_HUMAN LINE-1 retrotransposable element ORF2 protein OS=Homo sapiens OX=9606 PE=1 SV=1	opiNOG45423;opiNOG04272;NOG145335;opiNOG50433	SR	-	-	-	-
MSTRG.100307	ENSBGRG00000026628	MSTRG.100307.1	61261	19[+]39017029-39018289	19[-]38903337-38955768	USP43	GO:0004843;GO:0006511;GO:0016579;GO:0004843;GO:0006511;GO:0016579;GO:0004843;GO:0006511;GO:0016579;	K11856	ubiquitin specific peptidase 43 [Source:HGNC Symbol;Acc:HGNC:20072]	sp|Q70EL4|UBP43_HUMAN Ubiquitin carboxyl-terminal hydrolase 43 OS=Homo sapiens OX=9606 GN=USP43 PE=1 SV=2	veNOG00756	O	GO:0006511//ubiquitin-dependent protein catabolic process;GO:0016579//protein deubiquitination;GO:0006511//ubiquitin-dependent protein catabolic process;GO:0016579//protein deubiquitination;GO:0006511//ubiquitin-dependent protein catabolic process;GO:0016579//protein deubiquitination;	-	GO:0004843//thiol-dependent deubiquitinase;GO:0004843//thiol-dependent deubiquitinase;GO:0004843//thiol-dependent deubiquitinase;	-
MSTRG.100307	ENSBGRG00000026641	MSTRG.100307.1	26932	19[+]39017029-39018289	19[-]38957265-38990097	CFAP52	GO:0005515;GO:0005930;GO:0030317;GO:0061966;GO:0097729;GO:0005515;	K24728	cilia and flagella associated protein 52 [Source:HGNC Symbol;Acc:HGNC:16053]	sp|Q8N1V2|CFA52_HUMAN Cilia- and flagella-associated protein 52 OS=Homo sapiens OX=9606 GN=CFAP52 PE=1 SV=3	veNOG11199	R	GO:0030317//flagellated sperm motility;GO:0061966//establishment of left/right asymmetry;	GO:0005930//axoneme;GO:0097729//9+2 motile cilium;	GO:0005515//protein binding;GO:0005515//protein binding;	-
MSTRG.100307	ENSBGRG00000026647	MSTRG.100307.1	0	19[+]39017029-39018289	19[+]38990118-39234905	STX8	GO:0005768;GO:0005769;GO:0005770;GO:0005802;GO:0019869;GO:0019905;GO:0031625;GO:0031982;GO:0045022;GO:0045335;GO:0048471;GO:0055037;GO:0071346;GO:1903076;	K08501	syntaxin 8 [Source:HGNC Symbol;Acc:HGNC:11443]	sp|Q3T075|STX8_BOVIN Syntaxin-8 OS=Bos taurus OX=9913 GN=STX8 PE=2 SV=1	veNOG06677	U	GO:0045022//early endosome to late endosome transport;GO:0071346//cellular response to interferon-gamma;GO:1903076//regulation of protein localization to plasma membrane;	GO:0005768//endosome;GO:0005769//early endosome;GO:0005770//late endosome;GO:0005802//trans-Golgi network;GO:0031982//vesicle;GO:0045335//phagocytic vesicle;GO:0048471//perinuclear region of cytoplasm;GO:0055037//recycling endosome;	GO:0019869//chloride channel inhibitor activity;GO:0019905//syntaxin binding;GO:0031625//ubiquitin protein ligase binding;	ko04130(SNARE interactions in vesicular transport)
MSTRG.100308	ENSBGRG00000026649	MSTRG.100308.1	10056	19[+]39017673-39018897	19[-]39028953-39030179	-	-	-	-	sp|O00370|LORF2_HUMAN LINE-1 retrotransposable element ORF2 protein OS=Homo sapiens OX=9606 PE=1 SV=1	opiNOG45423;opiNOG04272;NOG145335;opiNOG50433	SR	-	-	-	-
MSTRG.100308	ENSBGRG00000026628	MSTRG.100308.1	61905	19[+]39017673-39018897	19[-]38903337-38955768	USP43	GO:0004843;GO:0006511;GO:0016579;GO:0004843;GO:0006511;GO:0016579;GO:0004843;GO:0006511;GO:0016579;	K11856	ubiquitin specific peptidase 43 [Source:HGNC Symbol;Acc:HGNC:20072]	sp|Q70EL4|UBP43_HUMAN Ubiquitin carboxyl-terminal hydrolase 43 OS=Homo sapiens OX=9606 GN=USP43 PE=1 SV=2	veNOG00756	O	GO:0006511//ubiquitin-dependent protein catabolic process;GO:0016579//protein deubiquitination;GO:0006511//ubiquitin-dependent protein catabolic process;GO:0016579//protein deubiquitination;GO:0006511//ubiquitin-dependent protein catabolic process;GO:0016579//protein deubiquitination;	-	GO:0004843//thiol-dependent deubiquitinase;GO:0004843//thiol-dependent deubiquitinase;GO:0004843//thiol-dependent deubiquitinase;	-
MSTRG.100308	ENSBGRG00000026641	MSTRG.100308.1	27576	19[+]39017673-39018897	19[-]38957265-38990097	CFAP52	GO:0005515;GO:0005930;GO:0030317;GO:0061966;GO:0097729;GO:0005515;	K24728	cilia and flagella associated protein 52 [Source:HGNC Symbol;Acc:HGNC:16053]	sp|Q8N1V2|CFA52_HUMAN Cilia- and flagella-associated protein 52 OS=Homo sapiens OX=9606 GN=CFAP52 PE=1 SV=3	veNOG11199	R	GO:0030317//flagellated sperm motility;GO:0061966//establishment of left/right asymmetry;	GO:0005930//axoneme;GO:0097729//9+2 motile cilium;	GO:0005515//protein binding;GO:0005515//protein binding;	-
MSTRG.100308	ENSBGRG00000026647	MSTRG.100308.1	0	19[+]39017673-39018897	19[+]38990118-39234905	STX8	GO:0005768;GO:0005769;GO:0005770;GO:0005802;GO:0019869;GO:0019905;GO:0031625;GO:0031982;GO:0045022;GO:0045335;GO:0048471;GO:0055037;GO:0071346;GO:1903076;	K08501	syntaxin 8 [Source:HGNC Symbol;Acc:HGNC:11443]	sp|Q3T075|STX8_BOVIN Syntaxin-8 OS=Bos taurus OX=9913 GN=STX8 PE=2 SV=1	veNOG06677	U	GO:0045022//early endosome to late endosome transport;GO:0071346//cellular response to interferon-gamma;GO:1903076//regulation of protein localization to plasma membrane;	GO:0005768//endosome;GO:0005769//early endosome;GO:0005770//late endosome;GO:0005802//trans-Golgi network;GO:0031982//vesicle;GO:0045335//phagocytic vesicle;GO:0048471//perinuclear region of cytoplasm;GO:0055037//recycling endosome;	GO:0019869//chloride channel inhibitor activity;GO:0019905//syntaxin binding;GO:0031625//ubiquitin protein ligase binding;	ko04130(SNARE interactions in vesicular transport)
MSTRG.100310	ENSBGRG00000026649	MSTRG.100310.1	19681	19[+]39049860-39050130	19[-]39028953-39030179	-	-	-	-	sp|O00370|LORF2_HUMAN LINE-1 retrotransposable element ORF2 protein OS=Homo sapiens OX=9606 PE=1 SV=1	opiNOG45423;opiNOG04272;NOG145335;opiNOG50433	SR	-	-	-	-
MSTRG.100310	ENSBGRG00000026650	MSTRG.100310.1	99078	19[+]39049860-39050130	19[-]39149208-39150855	-	-	-	-	sp|Q5R9R4|RL7_PONAB 60S ribosomal protein L7 OS=Pongo abelii OX=9601 GN=RPL7 PE=2 SV=1	veNOG09622	J	-	-	-	-
MSTRG.100310	ENSBGRG00000026628	MSTRG.100310.1	94092	19[+]39049860-39050130	19[-]38903337-38955768	USP43	GO:0004843;GO:0006511;GO:0016579;GO:0004843;GO:0006511;GO:0016579;GO:0004843;GO:0006511;GO:0016579;	K11856	ubiquitin specific peptidase 43 [Source:HGNC Symbol;Acc:HGNC:20072]	sp|Q70EL4|UBP43_HUMAN Ubiquitin carboxyl-terminal hydrolase 43 OS=Homo sapiens OX=9606 GN=USP43 PE=1 SV=2	veNOG00756	O	GO:0006511//ubiquitin-dependent protein catabolic process;GO:0016579//protein deubiquitination;GO:0006511//ubiquitin-dependent protein catabolic process;GO:0016579//protein deubiquitination;GO:0006511//ubiquitin-dependent protein catabolic process;GO:0016579//protein deubiquitination;	-	GO:0004843//thiol-dependent deubiquitinase;GO:0004843//thiol-dependent deubiquitinase;GO:0004843//thiol-dependent deubiquitinase;	-
MSTRG.100310	ENSBGRG00000026641	MSTRG.100310.1	59763	19[+]39049860-39050130	19[-]38957265-38990097	CFAP52	GO:0005515;GO:0005930;GO:0030317;GO:0061966;GO:0097729;GO:0005515;	K24728	cilia and flagella associated protein 52 [Source:HGNC Symbol;Acc:HGNC:16053]	sp|Q8N1V2|CFA52_HUMAN Cilia- and flagella-associated protein 52 OS=Homo sapiens OX=9606 GN=CFAP52 PE=1 SV=3	veNOG11199	R	GO:0030317//flagellated sperm motility;GO:0061966//establishment of left/right asymmetry;	GO:0005930//axoneme;GO:0097729//9+2 motile cilium;	GO:0005515//protein binding;GO:0005515//protein binding;	-
MSTRG.100310	ENSBGRG00000026647	MSTRG.100310.1	0	19[+]39049860-39050130	19[+]38990118-39234905	STX8	GO:0005768;GO:0005769;GO:0005770;GO:0005802;GO:0019869;GO:0019905;GO:0031625;GO:0031982;GO:0045022;GO:0045335;GO:0048471;GO:0055037;GO:0071346;GO:1903076;	K08501	syntaxin 8 [Source:HGNC Symbol;Acc:HGNC:11443]	sp|Q3T075|STX8_BOVIN Syntaxin-8 OS=Bos taurus OX=9913 GN=STX8 PE=2 SV=1	veNOG06677	U	GO:0045022//early endosome to late endosome transport;GO:0071346//cellular response to interferon-gamma;GO:1903076//regulation of protein localization to plasma membrane;	GO:0005768//endosome;GO:0005769//early endosome;GO:0005770//late endosome;GO:0005802//trans-Golgi network;GO:0031982//vesicle;GO:0045335//phagocytic vesicle;GO:0048471//perinuclear region of cytoplasm;GO:0055037//recycling endosome;	GO:0019869//chloride channel inhibitor activity;GO:0019905//syntaxin binding;GO:0031625//ubiquitin protein ligase binding;	ko04130(SNARE interactions in vesicular transport)
MSTRG.100311	ENSBGRG00000026649	MSTRG.100311.1	42480	19[+]39072659-39074141	19[-]39028953-39030179	-	-	-	-	sp|O00370|LORF2_HUMAN LINE-1 retrotransposable element ORF2 protein OS=Homo sapiens OX=9606 PE=1 SV=1	opiNOG45423;opiNOG04272;NOG145335;opiNOG50433	SR	-	-	-	-
MSTRG.100311	ENSBGRG00000026650	MSTRG.100311.1	75067	19[+]39072659-39074141	19[-]39149208-39150855	-	-	-	-	sp|Q5R9R4|RL7_PONAB 60S ribosomal protein L7 OS=Pongo abelii OX=9601 GN=RPL7 PE=2 SV=1	veNOG09622	J	-	-	-	-
MSTRG.100311	ENSBGRG00000026641	MSTRG.100311.1	82562	19[+]39072659-39074141	19[-]38957265-38990097	CFAP52	GO:0005515;GO:0005930;GO:0030317;GO:0061966;GO:0097729;GO:0005515;	K24728	cilia and flagella associated protein 52 [Source:HGNC Symbol;Acc:HGNC:16053]	sp|Q8N1V2|CFA52_HUMAN Cilia- and flagella-associated protein 52 OS=Homo sapiens OX=9606 GN=CFAP52 PE=1 SV=3	veNOG11199	R	GO:0030317//flagellated sperm motility;GO:0061966//establishment of left/right asymmetry;	GO:0005930//axoneme;GO:0097729//9+2 motile cilium;	GO:0005515//protein binding;GO:0005515//protein binding;	-
MSTRG.100311	ENSBGRG00000026647	MSTRG.100311.1	0	19[+]39072659-39074141	19[+]38990118-39234905	STX8	GO:0005768;GO:0005769;GO:0005770;GO:0005802;GO:0019869;GO:0019905;GO:0031625;GO:0031982;GO:0045022;GO:0045335;GO:0048471;GO:0055037;GO:0071346;GO:1903076;	K08501	syntaxin 8 [Source:HGNC Symbol;Acc:HGNC:11443]	sp|Q3T075|STX8_BOVIN Syntaxin-8 OS=Bos taurus OX=9913 GN=STX8 PE=2 SV=1	veNOG06677	U	GO:0045022//early endosome to late endosome transport;GO:0071346//cellular response to interferon-gamma;GO:1903076//regulation of protein localization to plasma membrane;	GO:0005768//endosome;GO:0005769//early endosome;GO:0005770//late endosome;GO:0005802//trans-Golgi network;GO:0031982//vesicle;GO:0045335//phagocytic vesicle;GO:0048471//perinuclear region of cytoplasm;GO:0055037//recycling endosome;	GO:0019869//chloride channel inhibitor activity;GO:0019905//syntaxin binding;GO:0031625//ubiquitin protein ligase binding;	ko04130(SNARE interactions in vesicular transport)
MSTRG.100312	ENSBGRG00000026649	MSTRG.100312.1	50289	19[+]39080468-39082006	19[-]39028953-39030179	-	-	-	-	sp|O00370|LORF2_HUMAN LINE-1 retrotransposable element ORF2 protein OS=Homo sapiens OX=9606 PE=1 SV=1	opiNOG45423;opiNOG04272;NOG145335;opiNOG50433	SR	-	-	-	-
MSTRG.100312	ENSBGRG00000026650	MSTRG.100312.1	67202	19[+]39080468-39082006	19[-]39149208-39150855	-	-	-	-	sp|Q5R9R4|RL7_PONAB 60S ribosomal protein L7 OS=Pongo abelii OX=9601 GN=RPL7 PE=2 SV=1	veNOG09622	J	-	-	-	-
MSTRG.100312	ENSBGRG00000026641	MSTRG.100312.1	90371	19[+]39080468-39082006	19[-]38957265-38990097	CFAP52	GO:0005515;GO:0005930;GO:0030317;GO:0061966;GO:0097729;GO:0005515;	K24728	cilia and flagella associated protein 52 [Source:HGNC Symbol;Acc:HGNC:16053]	sp|Q8N1V2|CFA52_HUMAN Cilia- and flagella-associated protein 52 OS=Homo sapiens OX=9606 GN=CFAP52 PE=1 SV=3	veNOG11199	R	GO:0030317//flagellated sperm motility;GO:0061966//establishment of left/right asymmetry;	GO:0005930//axoneme;GO:0097729//9+2 motile cilium;	GO:0005515//protein binding;GO:0005515//protein binding;	-
MSTRG.100312	ENSBGRG00000026647	MSTRG.100312.1	0	19[+]39080468-39082006	19[+]38990118-39234905	STX8	GO:0005768;GO:0005769;GO:0005770;GO:0005802;GO:0019869;GO:0019905;GO:0031625;GO:0031982;GO:0045022;GO:0045335;GO:0048471;GO:0055037;GO:0071346;GO:1903076;	K08501	syntaxin 8 [Source:HGNC Symbol;Acc:HGNC:11443]	sp|Q3T075|STX8_BOVIN Syntaxin-8 OS=Bos taurus OX=9913 GN=STX8 PE=2 SV=1	veNOG06677	U	GO:0045022//early endosome to late endosome transport;GO:0071346//cellular response to interferon-gamma;GO:1903076//regulation of protein localization to plasma membrane;	GO:0005768//endosome;GO:0005769//early endosome;GO:0005770//late endosome;GO:0005802//trans-Golgi network;GO:0031982//vesicle;GO:0045335//phagocytic vesicle;GO:0048471//perinuclear region of cytoplasm;GO:0055037//recycling endosome;	GO:0019869//chloride channel inhibitor activity;GO:0019905//syntaxin binding;GO:0031625//ubiquitin protein ligase binding;	ko04130(SNARE interactions in vesicular transport)
MSTRG.100313	ENSBGRG00000026649	MSTRG.100313.1	52736	19[+]39082915-39084351	19[-]39028953-39030179	-	-	-	-	sp|O00370|LORF2_HUMAN LINE-1 retrotransposable element ORF2 protein OS=Homo sapiens OX=9606 PE=1 SV=1	opiNOG45423;opiNOG04272;NOG145335;opiNOG50433	SR	-	-	-	-
MSTRG.100313	ENSBGRG00000026650	MSTRG.100313.1	64857	19[+]39082915-39084351	19[-]39149208-39150855	-	-	-	-	sp|Q5R9R4|RL7_PONAB 60S ribosomal protein L7 OS=Pongo abelii OX=9601 GN=RPL7 PE=2 SV=1	veNOG09622	J	-	-	-	-
MSTRG.100313	ENSBGRG00000026641	MSTRG.100313.1	92818	19[+]39082915-39084351	19[-]38957265-38990097	CFAP52	GO:0005515;GO:0005930;GO:0030317;GO:0061966;GO:0097729;GO:0005515;	K24728	cilia and flagella associated protein 52 [Source:HGNC Symbol;Acc:HGNC:16053]	sp|Q8N1V2|CFA52_HUMAN Cilia- and flagella-associated protein 52 OS=Homo sapiens OX=9606 GN=CFAP52 PE=1 SV=3	veNOG11199	R	GO:0030317//flagellated sperm motility;GO:0061966//establishment of left/right asymmetry;	GO:0005930//axoneme;GO:0097729//9+2 motile cilium;	GO:0005515//protein binding;GO:0005515//protein binding;	-
MSTRG.100313	ENSBGRG00000026647	MSTRG.100313.1	0	19[+]39082915-39084351	19[+]38990118-39234905	STX8	GO:0005768;GO:0005769;GO:0005770;GO:0005802;GO:0019869;GO:0019905;GO:0031625;GO:0031982;GO:0045022;GO:0045335;GO:0048471;GO:0055037;GO:0071346;GO:1903076;	K08501	syntaxin 8 [Source:HGNC Symbol;Acc:HGNC:11443]	sp|Q3T075|STX8_BOVIN Syntaxin-8 OS=Bos taurus OX=9913 GN=STX8 PE=2 SV=1	veNOG06677	U	GO:0045022//early endosome to late endosome transport;GO:0071346//cellular response to interferon-gamma;GO:1903076//regulation of protein localization to plasma membrane;	GO:0005768//endosome;GO:0005769//early endosome;GO:0005770//late endosome;GO:0005802//trans-Golgi network;GO:0031982//vesicle;GO:0045335//phagocytic vesicle;GO:0048471//perinuclear region of cytoplasm;GO:0055037//recycling endosome;	GO:0019869//chloride channel inhibitor activity;GO:0019905//syntaxin binding;GO:0031625//ubiquitin protein ligase binding;	ko04130(SNARE interactions in vesicular transport)
MSTRG.100314	ENSBGRG00000026649	MSTRG.100314.1	62292	19[+]39092471-39094159	19[-]39028953-39030179	-	-	-	-	sp|O00370|LORF2_HUMAN LINE-1 retrotransposable element ORF2 protein OS=Homo sapiens OX=9606 PE=1 SV=1	opiNOG45423;opiNOG04272;NOG145335;opiNOG50433	SR	-	-	-	-
MSTRG.100314	ENSBGRG00000026650	MSTRG.100314.1	55049	19[+]39092471-39094159	19[-]39149208-39150855	-	-	-	-	sp|Q5R9R4|RL7_PONAB 60S ribosomal protein L7 OS=Pongo abelii OX=9601 GN=RPL7 PE=2 SV=1	veNOG09622	J	-	-	-	-
MSTRG.100314	ENSBGRG00000026647	MSTRG.100314.1	0	19[+]39092471-39094159	19[+]38990118-39234905	STX8	GO:0005768;GO:0005769;GO:0005770;GO:0005802;GO:0019869;GO:0019905;GO:0031625;GO:0031982;GO:0045022;GO:0045335;GO:0048471;GO:0055037;GO:0071346;GO:1903076;	K08501	syntaxin 8 [Source:HGNC Symbol;Acc:HGNC:11443]	sp|Q3T075|STX8_BOVIN Syntaxin-8 OS=Bos taurus OX=9913 GN=STX8 PE=2 SV=1	veNOG06677	U	GO:0045022//early endosome to late endosome transport;GO:0071346//cellular response to interferon-gamma;GO:1903076//regulation of protein localization to plasma membrane;	GO:0005768//endosome;GO:0005769//early endosome;GO:0005770//late endosome;GO:0005802//trans-Golgi network;GO:0031982//vesicle;GO:0045335//phagocytic vesicle;GO:0048471//perinuclear region of cytoplasm;GO:0055037//recycling endosome;	GO:0019869//chloride channel inhibitor activity;GO:0019905//syntaxin binding;GO:0031625//ubiquitin protein ligase binding;	ko04130(SNARE interactions in vesicular transport)
MSTRG.100315	ENSBGRG00000026649	MSTRG.100315.1	69129	19[+]39099308-39100474	19[-]39028953-39030179	-	-	-	-	sp|O00370|LORF2_HUMAN LINE-1 retrotransposable element ORF2 protein OS=Homo sapiens OX=9606 PE=1 SV=1	opiNOG45423;opiNOG04272;NOG145335;opiNOG50433	SR	-	-	-	-
MSTRG.100315	ENSBGRG00000026650	MSTRG.100315.1	48734	19[+]39099308-39100474	19[-]39149208-39150855	-	-	-	-	sp|Q5R9R4|RL7_PONAB 60S ribosomal protein L7 OS=Pongo abelii OX=9601 GN=RPL7 PE=2 SV=1	veNOG09622	J	-	-	-	-
MSTRG.100315	ENSBGRG00000026647	MSTRG.100315.1	0	19[+]39099308-39100474	19[+]38990118-39234905	STX8	GO:0005768;GO:0005769;GO:0005770;GO:0005802;GO:0019869;GO:0019905;GO:0031625;GO:0031982;GO:0045022;GO:0045335;GO:0048471;GO:0055037;GO:0071346;GO:1903076;	K08501	syntaxin 8 [Source:HGNC Symbol;Acc:HGNC:11443]	sp|Q3T075|STX8_BOVIN Syntaxin-8 OS=Bos taurus OX=9913 GN=STX8 PE=2 SV=1	veNOG06677	U	GO:0045022//early endosome to late endosome transport;GO:0071346//cellular response to interferon-gamma;GO:1903076//regulation of protein localization to plasma membrane;	GO:0005768//endosome;GO:0005769//early endosome;GO:0005770//late endosome;GO:0005802//trans-Golgi network;GO:0031982//vesicle;GO:0045335//phagocytic vesicle;GO:0048471//perinuclear region of cytoplasm;GO:0055037//recycling endosome;	GO:0019869//chloride channel inhibitor activity;GO:0019905//syntaxin binding;GO:0031625//ubiquitin protein ligase binding;	ko04130(SNARE interactions in vesicular transport)
MSTRG.100316	ENSBGRG00000026649	MSTRG.100316.1	82070	19[+]39112249-39114634	19[-]39028953-39030179	-	-	-	-	sp|O00370|LORF2_HUMAN LINE-1 retrotransposable element ORF2 protein OS=Homo sapiens OX=9606 PE=1 SV=1	opiNOG45423;opiNOG04272;NOG145335;opiNOG50433	SR	-	-	-	-
MSTRG.100316	ENSBGRG00000026650	MSTRG.100316.1	34574	19[+]39112249-39114634	19[-]39149208-39150855	-	-	-	-	sp|Q5R9R4|RL7_PONAB 60S ribosomal protein L7 OS=Pongo abelii OX=9601 GN=RPL7 PE=2 SV=1	veNOG09622	J	-	-	-	-
MSTRG.100316	ENSBGRG00000026647	MSTRG.100316.1	0	19[+]39112249-39114634	19[+]38990118-39234905	STX8	GO:0005768;GO:0005769;GO:0005770;GO:0005802;GO:0019869;GO:0019905;GO:0031625;GO:0031982;GO:0045022;GO:0045335;GO:0048471;GO:0055037;GO:0071346;GO:1903076;	K08501	syntaxin 8 [Source:HGNC Symbol;Acc:HGNC:11443]	sp|Q3T075|STX8_BOVIN Syntaxin-8 OS=Bos taurus OX=9913 GN=STX8 PE=2 SV=1	veNOG06677	U	GO:0045022//early endosome to late endosome transport;GO:0071346//cellular response to interferon-gamma;GO:1903076//regulation of protein localization to plasma membrane;	GO:0005768//endosome;GO:0005769//early endosome;GO:0005770//late endosome;GO:0005802//trans-Golgi network;GO:0031982//vesicle;GO:0045335//phagocytic vesicle;GO:0048471//perinuclear region of cytoplasm;GO:0055037//recycling endosome;	GO:0019869//chloride channel inhibitor activity;GO:0019905//syntaxin binding;GO:0031625//ubiquitin protein ligase binding;	ko04130(SNARE interactions in vesicular transport)
MSTRG.100317	ENSBGRG00000026649	MSTRG.100317.1	82463	19[+]39112642-39115363	19[-]39028953-39030179	-	-	-	-	sp|O00370|LORF2_HUMAN LINE-1 retrotransposable element ORF2 protein OS=Homo sapiens OX=9606 PE=1 SV=1	opiNOG45423;opiNOG04272;NOG145335;opiNOG50433	SR	-	-	-	-
MSTRG.100317	ENSBGRG00000026650	MSTRG.100317.1	33845	19[+]39112642-39115363	19[-]39149208-39150855	-	-	-	-	sp|Q5R9R4|RL7_PONAB 60S ribosomal protein L7 OS=Pongo abelii OX=9601 GN=RPL7 PE=2 SV=1	veNOG09622	J	-	-	-	-
MSTRG.100317	ENSBGRG00000026647	MSTRG.100317.1	0	19[+]39112642-39115363	19[+]38990118-39234905	STX8	GO:0005768;GO:0005769;GO:0005770;GO:0005802;GO:0019869;GO:0019905;GO:0031625;GO:0031982;GO:0045022;GO:0045335;GO:0048471;GO:0055037;GO:0071346;GO:1903076;	K08501	syntaxin 8 [Source:HGNC Symbol;Acc:HGNC:11443]	sp|Q3T075|STX8_BOVIN Syntaxin-8 OS=Bos taurus OX=9913 GN=STX8 PE=2 SV=1	veNOG06677	U	GO:0045022//early endosome to late endosome transport;GO:0071346//cellular response to interferon-gamma;GO:1903076//regulation of protein localization to plasma membrane;	GO:0005768//endosome;GO:0005769//early endosome;GO:0005770//late endosome;GO:0005802//trans-Golgi network;GO:0031982//vesicle;GO:0045335//phagocytic vesicle;GO:0048471//perinuclear region of cytoplasm;GO:0055037//recycling endosome;	GO:0019869//chloride channel inhibitor activity;GO:0019905//syntaxin binding;GO:0031625//ubiquitin protein ligase binding;	ko04130(SNARE interactions in vesicular transport)
MSTRG.100318	ENSBGRG00000026650	MSTRG.100318.1	1336	19[+]39146232-39147872	19[-]39149208-39150855	-	-	-	-	sp|Q5R9R4|RL7_PONAB 60S ribosomal protein L7 OS=Pongo abelii OX=9601 GN=RPL7 PE=2 SV=1	veNOG09622	J	-	-	-	-
MSTRG.100318	ENSBGRG00000026654	MSTRG.100318.1	96236	19[+]39146232-39147872	19[-]39244108-39476067	NTN1	GO:0001764;GO:0005515;GO:0005576;GO:0005604;GO:0005654;GO:0005737;GO:0005829;GO:0007097;GO:0007409;GO:0007411;GO:0008283;GO:0014009;GO:0015629;GO:0030334;GO:0030517;GO:0030879;GO:0033564;GO:0042472;GO:0045773;GO:0051963;GO:0060252;GO:0060603;GO:0061643;GO:0097475;GO:0098609;GO:1903975;GO:0005515;	K06843	netrin 1 [Source:HGNC Symbol;Acc:HGNC:8029]	sp|O95631|NET1_HUMAN Netrin-1 OS=Homo sapiens OX=9606 GN=NTN1 PE=1 SV=2	veNOG04988	W	GO:0001764//neuron migration;GO:0007097//nuclear migration;GO:0007409//axonogenesis;GO:0007411//axon guidance;GO:0008283//cell population proliferation;GO:0014009//glial cell proliferation;GO:0030334//regulation of cell migration;GO:0030517//negative regulation of axon extension;GO:0030879//mammary gland development;GO:0033564//anterior/posterior axon guidance;GO:0042472//inner ear morphogenesis;…	GO:0005576//extracellular region;GO:0005604//basement membrane;GO:0005654//nucleoplasm;GO:0005737//cytoplasm;GO:0005829//cytosol;GO:0015629//actin cytoskeleton;	GO:0005515//protein binding;GO:0005515//protein binding;	ko04361(Axon regeneration);ko04360(Axon guidance)
MSTRG.100318	ENSBGRG00000026647	MSTRG.100318.1	0	19[+]39146232-39147872	19[+]38990118-39234905	STX8	GO:0005768;GO:0005769;GO:0005770;GO:0005802;GO:0019869;GO:0019905;GO:0031625;GO:0031982;GO:0045022;GO:0045335;GO:0048471;GO:0055037;GO:0071346;GO:1903076;	K08501	syntaxin 8 [Source:HGNC Symbol;Acc:HGNC:11443]	sp|Q3T075|STX8_BOVIN Syntaxin-8 OS=Bos taurus OX=9913 GN=STX8 PE=2 SV=1	veNOG06677	U	GO:0045022//early endosome to late endosome transport;GO:0071346//cellular response to interferon-gamma;GO:1903076//regulation of protein localization to plasma membrane;	GO:0005768//endosome;GO:0005769//early endosome;GO:0005770//late endosome;GO:0005802//trans-Golgi network;GO:0031982//vesicle;GO:0045335//phagocytic vesicle;GO:0048471//perinuclear region of cytoplasm;GO:0055037//recycling endosome;	GO:0019869//chloride channel inhibitor activity;GO:0019905//syntaxin binding;GO:0031625//ubiquitin protein ligase binding;	ko04130(SNARE interactions in vesicular transport)
MSTRG.100320	ENSBGRG00000026650	MSTRG.100320.3,MSTRG.100320.1,MSTRG.100320.4,MSTRG.100320.2,MSTRG.100320.5	8696	19[+]39159551-39162142	19[-]39149208-39150855	-	-	-	-	sp|Q5R9R4|RL7_PONAB 60S ribosomal protein L7 OS=Pongo abelii OX=9601 GN=RPL7 PE=2 SV=1	veNOG09622	J	-	-	-	-
MSTRG.100320	ENSBGRG00000026654	MSTRG.100320.3,MSTRG.100320.1,MSTRG.100320.4,MSTRG.100320.2,MSTRG.100320.5	81966	19[+]39159551-39162142	19[-]39244108-39476067	NTN1	GO:0001764;GO:0005515;GO:0005576;GO:0005604;GO:0005654;GO:0005737;GO:0005829;GO:0007097;GO:0007409;GO:0007411;GO:0008283;GO:0014009;GO:0015629;GO:0030334;GO:0030517;GO:0030879;GO:0033564;GO:0042472;GO:0045773;GO:0051963;GO:0060252;GO:0060603;GO:0061643;GO:0097475;GO:0098609;GO:1903975;GO:0005515;	K06843	netrin 1 [Source:HGNC Symbol;Acc:HGNC:8029]	sp|O95631|NET1_HUMAN Netrin-1 OS=Homo sapiens OX=9606 GN=NTN1 PE=1 SV=2	veNOG04988	W	GO:0001764//neuron migration;GO:0007097//nuclear migration;GO:0007409//axonogenesis;GO:0007411//axon guidance;GO:0008283//cell population proliferation;GO:0014009//glial cell proliferation;GO:0030334//regulation of cell migration;GO:0030517//negative regulation of axon extension;GO:0030879//mammary gland development;GO:0033564//anterior/posterior axon guidance;GO:0042472//inner ear morphogenesis;…	GO:0005576//extracellular region;GO:0005604//basement membrane;GO:0005654//nucleoplasm;GO:0005737//cytoplasm;GO:0005829//cytosol;GO:0015629//actin cytoskeleton;	GO:0005515//protein binding;GO:0005515//protein binding;	ko04361(Axon regeneration);ko04360(Axon guidance)
MSTRG.100320	ENSBGRG00000026647	MSTRG.100320.3,MSTRG.100320.1,MSTRG.100320.4,MSTRG.100320.2,MSTRG.100320.5	0	19[+]39159551-39162142	19[+]38990118-39234905	STX8	GO:0005768;GO:0005769;GO:0005770;GO:0005802;GO:0019869;GO:0019905;GO:0031625;GO:0031982;GO:0045022;GO:0045335;GO:0048471;GO:0055037;GO:0071346;GO:1903076;	K08501	syntaxin 8 [Source:HGNC Symbol;Acc:HGNC:11443]	sp|Q3T075|STX8_BOVIN Syntaxin-8 OS=Bos taurus OX=9913 GN=STX8 PE=2 SV=1	veNOG06677	U	GO:0045022//early endosome to late endosome transport;GO:0071346//cellular response to interferon-gamma;GO:1903076//regulation of protein localization to plasma membrane;	GO:0005768//endosome;GO:0005769//early endosome;GO:0005770//late endosome;GO:0005802//trans-Golgi network;GO:0031982//vesicle;GO:0045335//phagocytic vesicle;GO:0048471//perinuclear region of cytoplasm;GO:0055037//recycling endosome;	GO:0019869//chloride channel inhibitor activity;GO:0019905//syntaxin binding;GO:0031625//ubiquitin protein ligase binding;	ko04130(SNARE interactions in vesicular transport)
MSTRG.100321	ENSBGRG00000026650	MSTRG.100321.1	17970	19[+]39168825-39170194	19[-]39149208-39150855	-	-	-	-	sp|Q5R9R4|RL7_PONAB 60S ribosomal protein L7 OS=Pongo abelii OX=9601 GN=RPL7 PE=2 SV=1	veNOG09622	J	-	-	-	-
MSTRG.100321	ENSBGRG00000026654	MSTRG.100321.1	73914	19[+]39168825-39170194	19[-]39244108-39476067	NTN1	GO:0001764;GO:0005515;GO:0005576;GO:0005604;GO:0005654;GO:0005737;GO:0005829;GO:0007097;GO:0007409;GO:0007411;GO:0008283;GO:0014009;GO:0015629;GO:0030334;GO:0030517;GO:0030879;GO:0033564;GO:0042472;GO:0045773;GO:0051963;GO:0060252;GO:0060603;GO:0061643;GO:0097475;GO:0098609;GO:1903975;GO:0005515;	K06843	netrin 1 [Source:HGNC Symbol;Acc:HGNC:8029]	sp|O95631|NET1_HUMAN Netrin-1 OS=Homo sapiens OX=9606 GN=NTN1 PE=1 SV=2	veNOG04988	W	GO:0001764//neuron migration;GO:0007097//nuclear migration;GO:0007409//axonogenesis;GO:0007411//axon guidance;GO:0008283//cell population proliferation;GO:0014009//glial cell proliferation;GO:0030334//regulation of cell migration;GO:0030517//negative regulation of axon extension;GO:0030879//mammary gland development;GO:0033564//anterior/posterior axon guidance;GO:0042472//inner ear morphogenesis;…	GO:0005576//extracellular region;GO:0005604//basement membrane;GO:0005654//nucleoplasm;GO:0005737//cytoplasm;GO:0005829//cytosol;GO:0015629//actin cytoskeleton;	GO:0005515//protein binding;GO:0005515//protein binding;	ko04361(Axon regeneration);ko04360(Axon guidance)
MSTRG.100321	ENSBGRG00000026647	MSTRG.100321.1	0	19[+]39168825-39170194	19[+]38990118-39234905	STX8	GO:0005768;GO:0005769;GO:0005770;GO:0005802;GO:0019869;GO:0019905;GO:0031625;GO:0031982;GO:0045022;GO:0045335;GO:0048471;GO:0055037;GO:0071346;GO:1903076;	K08501	syntaxin 8 [Source:HGNC Symbol;Acc:HGNC:11443]	sp|Q3T075|STX8_BOVIN Syntaxin-8 OS=Bos taurus OX=9913 GN=STX8 PE=2 SV=1	veNOG06677	U	GO:0045022//early endosome to late endosome transport;GO:0071346//cellular response to interferon-gamma;GO:1903076//regulation of protein localization to plasma membrane;	GO:0005768//endosome;GO:0005769//early endosome;GO:0005770//late endosome;GO:0005802//trans-Golgi network;GO:0031982//vesicle;GO:0045335//phagocytic vesicle;GO:0048471//perinuclear region of cytoplasm;GO:0055037//recycling endosome;	GO:0019869//chloride channel inhibitor activity;GO:0019905//syntaxin binding;GO:0031625//ubiquitin protein ligase binding;	ko04130(SNARE interactions in vesicular transport)
MSTRG.100322	ENSBGRG00000026650	MSTRG.100322.1	57985	19[+]39208840-39211215	19[-]39149208-39150855	-	-	-	-	sp|Q5R9R4|RL7_PONAB 60S ribosomal protein L7 OS=Pongo abelii OX=9601 GN=RPL7 PE=2 SV=1	veNOG09622	J	-	-	-	-
MSTRG.100322	ENSBGRG00000026654	MSTRG.100322.1	32893	19[+]39208840-39211215	19[-]39244108-39476067	NTN1	GO:0001764;GO:0005515;GO:0005576;GO:0005604;GO:0005654;GO:0005737;GO:0005829;GO:0007097;GO:0007409;GO:0007411;GO:0008283;GO:0014009;GO:0015629;GO:0030334;GO:0030517;GO:0030879;GO:0033564;GO:0042472;GO:0045773;GO:0051963;GO:0060252;GO:0060603;GO:0061643;GO:0097475;GO:0098609;GO:1903975;GO:0005515;	K06843	netrin 1 [Source:HGNC Symbol;Acc:HGNC:8029]	sp|O95631|NET1_HUMAN Netrin-1 OS=Homo sapiens OX=9606 GN=NTN1 PE=1 SV=2	veNOG04988	W	GO:0001764//neuron migration;GO:0007097//nuclear migration;GO:0007409//axonogenesis;GO:0007411//axon guidance;GO:0008283//cell population proliferation;GO:0014009//glial cell proliferation;GO:0030334//regulation of cell migration;GO:0030517//negative regulation of axon extension;GO:0030879//mammary gland development;GO:0033564//anterior/posterior axon guidance;GO:0042472//inner ear morphogenesis;…	GO:0005576//extracellular region;GO:0005604//basement membrane;GO:0005654//nucleoplasm;GO:0005737//cytoplasm;GO:0005829//cytosol;GO:0015629//actin cytoskeleton;	GO:0005515//protein binding;GO:0005515//protein binding;	ko04361(Axon regeneration);ko04360(Axon guidance)
MSTRG.100322	ENSBGRG00000026647	MSTRG.100322.1	0	19[+]39208840-39211215	19[+]38990118-39234905	STX8	GO:0005768;GO:0005769;GO:0005770;GO:0005802;GO:0019869;GO:0019905;GO:0031625;GO:0031982;GO:0045022;GO:0045335;GO:0048471;GO:0055037;GO:0071346;GO:1903076;	K08501	syntaxin 8 [Source:HGNC Symbol;Acc:HGNC:11443]	sp|Q3T075|STX8_BOVIN Syntaxin-8 OS=Bos taurus OX=9913 GN=STX8 PE=2 SV=1	veNOG06677	U	GO:0045022//early endosome to late endosome transport;GO:0071346//cellular response to interferon-gamma;GO:1903076//regulation of protein localization to plasma membrane;	GO:0005768//endosome;GO:0005769//early endosome;GO:0005770//late endosome;GO:0005802//trans-Golgi network;GO:0031982//vesicle;GO:0045335//phagocytic vesicle;GO:0048471//perinuclear region of cytoplasm;GO:0055037//recycling endosome;	GO:0019869//chloride channel inhibitor activity;GO:0019905//syntaxin binding;GO:0031625//ubiquitin protein ligase binding;	ko04130(SNARE interactions in vesicular transport)
MSTRG.100329	ENSBGRG00000026654	MSTRG.100329.1	0	19[-]39305146-39306360	19[-]39244108-39476067	NTN1	GO:0001764;GO:0005515;GO:0005576;GO:0005604;GO:0005654;GO:0005737;GO:0005829;GO:0007097;GO:0007409;GO:0007411;GO:0008283;GO:0014009;GO:0015629;GO:0030334;GO:0030517;GO:0030879;GO:0033564;GO:0042472;GO:0045773;GO:0051963;GO:0060252;GO:0060603;GO:0061643;GO:0097475;GO:0098609;GO:1903975;GO:0005515;	K06843	netrin 1 [Source:HGNC Symbol;Acc:HGNC:8029]	sp|O95631|NET1_HUMAN Netrin-1 OS=Homo sapiens OX=9606 GN=NTN1 PE=1 SV=2	veNOG04988	W	GO:0001764//neuron migration;GO:0007097//nuclear migration;GO:0007409//axonogenesis;GO:0007411//axon guidance;GO:0008283//cell population proliferation;GO:0014009//glial cell proliferation;GO:0030334//regulation of cell migration;GO:0030517//negative regulation of axon extension;GO:0030879//mammary gland development;GO:0033564//anterior/posterior axon guidance;GO:0042472//inner ear morphogenesis;…	GO:0005576//extracellular region;GO:0005604//basement membrane;GO:0005654//nucleoplasm;GO:0005737//cytoplasm;GO:0005829//cytosol;GO:0015629//actin cytoskeleton;	GO:0005515//protein binding;GO:0005515//protein binding;	ko04361(Axon regeneration);ko04360(Axon guidance)
MSTRG.100329	ENSBGRG00000026647	MSTRG.100329.1	70241	19[-]39305146-39306360	19[+]38990118-39234905	STX8	GO:0005768;GO:0005769;GO:0005770;GO:0005802;GO:0019869;GO:0019905;GO:0031625;GO:0031982;GO:0045022;GO:0045335;GO:0048471;GO:0055037;GO:0071346;GO:1903076;	K08501	syntaxin 8 [Source:HGNC Symbol;Acc:HGNC:11443]	sp|Q3T075|STX8_BOVIN Syntaxin-8 OS=Bos taurus OX=9913 GN=STX8 PE=2 SV=1	veNOG06677	U	GO:0045022//early endosome to late endosome transport;GO:0071346//cellular response to interferon-gamma;GO:1903076//regulation of protein localization to plasma membrane;	GO:0005768//endosome;GO:0005769//early endosome;GO:0005770//late endosome;GO:0005802//trans-Golgi network;GO:0031982//vesicle;GO:0045335//phagocytic vesicle;GO:0048471//perinuclear region of cytoplasm;GO:0055037//recycling endosome;	GO:0019869//chloride channel inhibitor activity;GO:0019905//syntaxin binding;GO:0031625//ubiquitin protein ligase binding;	ko04130(SNARE interactions in vesicular transport)
MSTRG.100330	ENSBGRG00000026658	MSTRG.100330.1	58455	19[-]39434687-39435455	19[+]39493910-39571907	PIK3R5	GO:0005829;GO:0005944;GO:0034451;GO:0046935;GO:0005944;GO:0046935;	K21290	phosphoinositide-3-kinase regulatory subunit 5 [Source:HGNC Symbol;Acc:HGNC:30035]	sp|O02696|PI3R5_PIG Phosphoinositide 3-kinase regulatory subunit 5 OS=Sus scrofa OX=9823 GN=PIK3R5 PE=1 SV=1	veNOG10696	T	-	GO:0005829//cytosol;GO:0005944//phosphatidylinositol 3-kinase complex, class IB;GO:0034451//centriolar satellite;GO:0005944//phosphatidylinositol 3-kinase complex, class IB;	GO:0046935//1-phosphatidylinositol-3-kinase regulator activity;GO:0046935//1-phosphatidylinositol-3-kinase regulator activity;	ko05167(Kaposi sarcoma-associated herpesvirus infection);ko05145(Toxoplasmosis);ko04921(Oxytocin signaling pathway);ko04725(Cholinergic synapse);ko04611(Platelet activation);ko04371(Apelin signaling pathway);ko04261(Adrenergic signaling in cardiomyocytes);ko04151(PI3K-Akt signaling pathway);ko04072(Phospholipase D signaling pathway);ko04062(Chemokine signaling pathway);ko04022(cGMP-PKG signaling …
MSTRG.100330	ENSBGRG00000026654	MSTRG.100330.1	0	19[-]39434687-39435455	19[-]39244108-39476067	NTN1	GO:0001764;GO:0005515;GO:0005576;GO:0005604;GO:0005654;GO:0005737;GO:0005829;GO:0007097;GO:0007409;GO:0007411;GO:0008283;GO:0014009;GO:0015629;GO:0030334;GO:0030517;GO:0030879;GO:0033564;GO:0042472;GO:0045773;GO:0051963;GO:0060252;GO:0060603;GO:0061643;GO:0097475;GO:0098609;GO:1903975;GO:0005515;	K06843	netrin 1 [Source:HGNC Symbol;Acc:HGNC:8029]	sp|O95631|NET1_HUMAN Netrin-1 OS=Homo sapiens OX=9606 GN=NTN1 PE=1 SV=2	veNOG04988	W	GO:0001764//neuron migration;GO:0007097//nuclear migration;GO:0007409//axonogenesis;GO:0007411//axon guidance;GO:0008283//cell population proliferation;GO:0014009//glial cell proliferation;GO:0030334//regulation of cell migration;GO:0030517//negative regulation of axon extension;GO:0030879//mammary gland development;GO:0033564//anterior/posterior axon guidance;GO:0042472//inner ear morphogenesis;…	GO:0005576//extracellular region;GO:0005604//basement membrane;GO:0005654//nucleoplasm;GO:0005737//cytoplasm;GO:0005829//cytosol;GO:0015629//actin cytoskeleton;	GO:0005515//protein binding;GO:0005515//protein binding;	ko04361(Axon regeneration);ko04360(Axon guidance)
MSTRG.100331	ENSBGRG00000026658	MSTRG.100331.1	49930	19[-]39442512-39443980	19[+]39493910-39571907	PIK3R5	GO:0005829;GO:0005944;GO:0034451;GO:0046935;GO:0005944;GO:0046935;	K21290	phosphoinositide-3-kinase regulatory subunit 5 [Source:HGNC Symbol;Acc:HGNC:30035]	sp|O02696|PI3R5_PIG Phosphoinositide 3-kinase regulatory subunit 5 OS=Sus scrofa OX=9823 GN=PIK3R5 PE=1 SV=1	veNOG10696	T	-	GO:0005829//cytosol;GO:0005944//phosphatidylinositol 3-kinase complex, class IB;GO:0034451//centriolar satellite;GO:0005944//phosphatidylinositol 3-kinase complex, class IB;	GO:0046935//1-phosphatidylinositol-3-kinase regulator activity;GO:0046935//1-phosphatidylinositol-3-kinase regulator activity;	ko05167(Kaposi sarcoma-associated herpesvirus infection);ko05145(Toxoplasmosis);ko04921(Oxytocin signaling pathway);ko04725(Cholinergic synapse);ko04611(Platelet activation);ko04371(Apelin signaling pathway);ko04261(Adrenergic signaling in cardiomyocytes);ko04151(PI3K-Akt signaling pathway);ko04072(Phospholipase D signaling pathway);ko04062(Chemokine signaling pathway);ko04022(cGMP-PKG signaling …
MSTRG.100331	ENSBGRG00000026654	MSTRG.100331.1	0	19[-]39442512-39443980	19[-]39244108-39476067	NTN1	GO:0001764;GO:0005515;GO:0005576;GO:0005604;GO:0005654;GO:0005737;GO:0005829;GO:0007097;GO:0007409;GO:0007411;GO:0008283;GO:0014009;GO:0015629;GO:0030334;GO:0030517;GO:0030879;GO:0033564;GO:0042472;GO:0045773;GO:0051963;GO:0060252;GO:0060603;GO:0061643;GO:0097475;GO:0098609;GO:1903975;GO:0005515;	K06843	netrin 1 [Source:HGNC Symbol;Acc:HGNC:8029]	sp|O95631|NET1_HUMAN Netrin-1 OS=Homo sapiens OX=9606 GN=NTN1 PE=1 SV=2	veNOG04988	W	GO:0001764//neuron migration;GO:0007097//nuclear migration;GO:0007409//axonogenesis;GO:0007411//axon guidance;GO:0008283//cell population proliferation;GO:0014009//glial cell proliferation;GO:0030334//regulation of cell migration;GO:0030517//negative regulation of axon extension;GO:0030879//mammary gland development;GO:0033564//anterior/posterior axon guidance;GO:0042472//inner ear morphogenesis;…	GO:0005576//extracellular region;GO:0005604//basement membrane;GO:0005654//nucleoplasm;GO:0005737//cytoplasm;GO:0005829//cytosol;GO:0015629//actin cytoskeleton;	GO:0005515//protein binding;GO:0005515//protein binding;	ko04361(Axon regeneration);ko04360(Axon guidance)
MSTRG.100332	ENSBGRG00000026658	MSTRG.100332.1	46024	19[-]39446353-39447886	19[+]39493910-39571907	PIK3R5	GO:0005829;GO:0005944;GO:0034451;GO:0046935;GO:0005944;GO:0046935;	K21290	phosphoinositide-3-kinase regulatory subunit 5 [Source:HGNC Symbol;Acc:HGNC:30035]	sp|O02696|PI3R5_PIG Phosphoinositide 3-kinase regulatory subunit 5 OS=Sus scrofa OX=9823 GN=PIK3R5 PE=1 SV=1	veNOG10696	T	-	GO:0005829//cytosol;GO:0005944//phosphatidylinositol 3-kinase complex, class IB;GO:0034451//centriolar satellite;GO:0005944//phosphatidylinositol 3-kinase complex, class IB;	GO:0046935//1-phosphatidylinositol-3-kinase regulator activity;GO:0046935//1-phosphatidylinositol-3-kinase regulator activity;	ko05167(Kaposi sarcoma-associated herpesvirus infection);ko05145(Toxoplasmosis);ko04921(Oxytocin signaling pathway);ko04725(Cholinergic synapse);ko04611(Platelet activation);ko04371(Apelin signaling pathway);ko04261(Adrenergic signaling in cardiomyocytes);ko04151(PI3K-Akt signaling pathway);ko04072(Phospholipase D signaling pathway);ko04062(Chemokine signaling pathway);ko04022(cGMP-PKG signaling …
MSTRG.100332	ENSBGRG00000026654	MSTRG.100332.1	0	19[-]39446353-39447886	19[-]39244108-39476067	NTN1	GO:0001764;GO:0005515;GO:0005576;GO:0005604;GO:0005654;GO:0005737;GO:0005829;GO:0007097;GO:0007409;GO:0007411;GO:0008283;GO:0014009;GO:0015629;GO:0030334;GO:0030517;GO:0030879;GO:0033564;GO:0042472;GO:0045773;GO:0051963;GO:0060252;GO:0060603;GO:0061643;GO:0097475;GO:0098609;GO:1903975;GO:0005515;	K06843	netrin 1 [Source:HGNC Symbol;Acc:HGNC:8029]	sp|O95631|NET1_HUMAN Netrin-1 OS=Homo sapiens OX=9606 GN=NTN1 PE=1 SV=2	veNOG04988	W	GO:0001764//neuron migration;GO:0007097//nuclear migration;GO:0007409//axonogenesis;GO:0007411//axon guidance;GO:0008283//cell population proliferation;GO:0014009//glial cell proliferation;GO:0030334//regulation of cell migration;GO:0030517//negative regulation of axon extension;GO:0030879//mammary gland development;GO:0033564//anterior/posterior axon guidance;GO:0042472//inner ear morphogenesis;…	GO:0005576//extracellular region;GO:0005604//basement membrane;GO:0005654//nucleoplasm;GO:0005737//cytoplasm;GO:0005829//cytosol;GO:0015629//actin cytoskeleton;	GO:0005515//protein binding;GO:0005515//protein binding;	ko04361(Axon regeneration);ko04360(Axon guidance)
MSTRG.100333	ENSBGRG00000026658	MSTRG.100333.1	45603	19[-]39446760-39448307	19[+]39493910-39571907	PIK3R5	GO:0005829;GO:0005944;GO:0034451;GO:0046935;GO:0005944;GO:0046935;	K21290	phosphoinositide-3-kinase regulatory subunit 5 [Source:HGNC Symbol;Acc:HGNC:30035]	sp|O02696|PI3R5_PIG Phosphoinositide 3-kinase regulatory subunit 5 OS=Sus scrofa OX=9823 GN=PIK3R5 PE=1 SV=1	veNOG10696	T	-	GO:0005829//cytosol;GO:0005944//phosphatidylinositol 3-kinase complex, class IB;GO:0034451//centriolar satellite;GO:0005944//phosphatidylinositol 3-kinase complex, class IB;	GO:0046935//1-phosphatidylinositol-3-kinase regulator activity;GO:0046935//1-phosphatidylinositol-3-kinase regulator activity;	ko05167(Kaposi sarcoma-associated herpesvirus infection);ko05145(Toxoplasmosis);ko04921(Oxytocin signaling pathway);ko04725(Cholinergic synapse);ko04611(Platelet activation);ko04371(Apelin signaling pathway);ko04261(Adrenergic signaling in cardiomyocytes);ko04151(PI3K-Akt signaling pathway);ko04072(Phospholipase D signaling pathway);ko04062(Chemokine signaling pathway);ko04022(cGMP-PKG signaling …
MSTRG.100333	ENSBGRG00000026654	MSTRG.100333.1	0	19[-]39446760-39448307	19[-]39244108-39476067	NTN1	GO:0001764;GO:0005515;GO:0005576;GO:0005604;GO:0005654;GO:0005737;GO:0005829;GO:0007097;GO:0007409;GO:0007411;GO:0008283;GO:0014009;GO:0015629;GO:0030334;GO:0030517;GO:0030879;GO:0033564;GO:0042472;GO:0045773;GO:0051963;GO:0060252;GO:0060603;GO:0061643;GO:0097475;GO:0098609;GO:1903975;GO:0005515;	K06843	netrin 1 [Source:HGNC Symbol;Acc:HGNC:8029]	sp|O95631|NET1_HUMAN Netrin-1 OS=Homo sapiens OX=9606 GN=NTN1 PE=1 SV=2	veNOG04988	W	GO:0001764//neuron migration;GO:0007097//nuclear migration;GO:0007409//axonogenesis;GO:0007411//axon guidance;GO:0008283//cell population proliferation;GO:0014009//glial cell proliferation;GO:0030334//regulation of cell migration;GO:0030517//negative regulation of axon extension;GO:0030879//mammary gland development;GO:0033564//anterior/posterior axon guidance;GO:0042472//inner ear morphogenesis;…	GO:0005576//extracellular region;GO:0005604//basement membrane;GO:0005654//nucleoplasm;GO:0005737//cytoplasm;GO:0005829//cytosol;GO:0015629//actin cytoskeleton;	GO:0005515//protein binding;GO:0005515//protein binding;	ko04361(Axon regeneration);ko04360(Axon guidance)
MSTRG.100334	ENSBGRG00000026658	MSTRG.100334.1	45129	19[-]39447054-39448781	19[+]39493910-39571907	PIK3R5	GO:0005829;GO:0005944;GO:0034451;GO:0046935;GO:0005944;GO:0046935;	K21290	phosphoinositide-3-kinase regulatory subunit 5 [Source:HGNC Symbol;Acc:HGNC:30035]	sp|O02696|PI3R5_PIG Phosphoinositide 3-kinase regulatory subunit 5 OS=Sus scrofa OX=9823 GN=PIK3R5 PE=1 SV=1	veNOG10696	T	-	GO:0005829//cytosol;GO:0005944//phosphatidylinositol 3-kinase complex, class IB;GO:0034451//centriolar satellite;GO:0005944//phosphatidylinositol 3-kinase complex, class IB;	GO:0046935//1-phosphatidylinositol-3-kinase regulator activity;GO:0046935//1-phosphatidylinositol-3-kinase regulator activity;	ko05167(Kaposi sarcoma-associated herpesvirus infection);ko05145(Toxoplasmosis);ko04921(Oxytocin signaling pathway);ko04725(Cholinergic synapse);ko04611(Platelet activation);ko04371(Apelin signaling pathway);ko04261(Adrenergic signaling in cardiomyocytes);ko04151(PI3K-Akt signaling pathway);ko04072(Phospholipase D signaling pathway);ko04062(Chemokine signaling pathway);ko04022(cGMP-PKG signaling …
MSTRG.100334	ENSBGRG00000026654	MSTRG.100334.1	0	19[-]39447054-39448781	19[-]39244108-39476067	NTN1	GO:0001764;GO:0005515;GO:0005576;GO:0005604;GO:0005654;GO:0005737;GO:0005829;GO:0007097;GO:0007409;GO:0007411;GO:0008283;GO:0014009;GO:0015629;GO:0030334;GO:0030517;GO:0030879;GO:0033564;GO:0042472;GO:0045773;GO:0051963;GO:0060252;GO:0060603;GO:0061643;GO:0097475;GO:0098609;GO:1903975;GO:0005515;	K06843	netrin 1 [Source:HGNC Symbol;Acc:HGNC:8029]	sp|O95631|NET1_HUMAN Netrin-1 OS=Homo sapiens OX=9606 GN=NTN1 PE=1 SV=2	veNOG04988	W	GO:0001764//neuron migration;GO:0007097//nuclear migration;GO:0007409//axonogenesis;GO:0007411//axon guidance;GO:0008283//cell population proliferation;GO:0014009//glial cell proliferation;GO:0030334//regulation of cell migration;GO:0030517//negative regulation of axon extension;GO:0030879//mammary gland development;GO:0033564//anterior/posterior axon guidance;GO:0042472//inner ear morphogenesis;…	GO:0005576//extracellular region;GO:0005604//basement membrane;GO:0005654//nucleoplasm;GO:0005737//cytoplasm;GO:0005829//cytosol;GO:0015629//actin cytoskeleton;	GO:0005515//protein binding;GO:0005515//protein binding;	ko04361(Axon regeneration);ko04360(Axon guidance)
MSTRG.100335	ENSBGRG00000026658	MSTRG.100335.1	42459	19[-]39450000-39451451	19[+]39493910-39571907	PIK3R5	GO:0005829;GO:0005944;GO:0034451;GO:0046935;GO:0005944;GO:0046935;	K21290	phosphoinositide-3-kinase regulatory subunit 5 [Source:HGNC Symbol;Acc:HGNC:30035]	sp|O02696|PI3R5_PIG Phosphoinositide 3-kinase regulatory subunit 5 OS=Sus scrofa OX=9823 GN=PIK3R5 PE=1 SV=1	veNOG10696	T	-	GO:0005829//cytosol;GO:0005944//phosphatidylinositol 3-kinase complex, class IB;GO:0034451//centriolar satellite;GO:0005944//phosphatidylinositol 3-kinase complex, class IB;	GO:0046935//1-phosphatidylinositol-3-kinase regulator activity;GO:0046935//1-phosphatidylinositol-3-kinase regulator activity;	ko05167(Kaposi sarcoma-associated herpesvirus infection);ko05145(Toxoplasmosis);ko04921(Oxytocin signaling pathway);ko04725(Cholinergic synapse);ko04611(Platelet activation);ko04371(Apelin signaling pathway);ko04261(Adrenergic signaling in cardiomyocytes);ko04151(PI3K-Akt signaling pathway);ko04072(Phospholipase D signaling pathway);ko04062(Chemokine signaling pathway);ko04022(cGMP-PKG signaling …
MSTRG.100335	ENSBGRG00000026654	MSTRG.100335.1	0	19[-]39450000-39451451	19[-]39244108-39476067	NTN1	GO:0001764;GO:0005515;GO:0005576;GO:0005604;GO:0005654;GO:0005737;GO:0005829;GO:0007097;GO:0007409;GO:0007411;GO:0008283;GO:0014009;GO:0015629;GO:0030334;GO:0030517;GO:0030879;GO:0033564;GO:0042472;GO:0045773;GO:0051963;GO:0060252;GO:0060603;GO:0061643;GO:0097475;GO:0098609;GO:1903975;GO:0005515;	K06843	netrin 1 [Source:HGNC Symbol;Acc:HGNC:8029]	sp|O95631|NET1_HUMAN Netrin-1 OS=Homo sapiens OX=9606 GN=NTN1 PE=1 SV=2	veNOG04988	W	GO:0001764//neuron migration;GO:0007097//nuclear migration;GO:0007409//axonogenesis;GO:0007411//axon guidance;GO:0008283//cell population proliferation;GO:0014009//glial cell proliferation;GO:0030334//regulation of cell migration;GO:0030517//negative regulation of axon extension;GO:0030879//mammary gland development;GO:0033564//anterior/posterior axon guidance;GO:0042472//inner ear morphogenesis;…	GO:0005576//extracellular region;GO:0005604//basement membrane;GO:0005654//nucleoplasm;GO:0005737//cytoplasm;GO:0005829//cytosol;GO:0015629//actin cytoskeleton;	GO:0005515//protein binding;GO:0005515//protein binding;	ko04361(Axon regeneration);ko04360(Axon guidance)
MSTRG.100336	ENSBGRG00000026658	MSTRG.100336.1	41961	19[-]39450430-39451949	19[+]39493910-39571907	PIK3R5	GO:0005829;GO:0005944;GO:0034451;GO:0046935;GO:0005944;GO:0046935;	K21290	phosphoinositide-3-kinase regulatory subunit 5 [Source:HGNC Symbol;Acc:HGNC:30035]	sp|O02696|PI3R5_PIG Phosphoinositide 3-kinase regulatory subunit 5 OS=Sus scrofa OX=9823 GN=PIK3R5 PE=1 SV=1	veNOG10696	T	-	GO:0005829//cytosol;GO:0005944//phosphatidylinositol 3-kinase complex, class IB;GO:0034451//centriolar satellite;GO:0005944//phosphatidylinositol 3-kinase complex, class IB;	GO:0046935//1-phosphatidylinositol-3-kinase regulator activity;GO:0046935//1-phosphatidylinositol-3-kinase regulator activity;	ko05167(Kaposi sarcoma-associated herpesvirus infection);ko05145(Toxoplasmosis);ko04921(Oxytocin signaling pathway);ko04725(Cholinergic synapse);ko04611(Platelet activation);ko04371(Apelin signaling pathway);ko04261(Adrenergic signaling in cardiomyocytes);ko04151(PI3K-Akt signaling pathway);ko04072(Phospholipase D signaling pathway);ko04062(Chemokine signaling pathway);ko04022(cGMP-PKG signaling …
MSTRG.100336	ENSBGRG00000026654	MSTRG.100336.1	0	19[-]39450430-39451949	19[-]39244108-39476067	NTN1	GO:0001764;GO:0005515;GO:0005576;GO:0005604;GO:0005654;GO:0005737;GO:0005829;GO:0007097;GO:0007409;GO:0007411;GO:0008283;GO:0014009;GO:0015629;GO:0030334;GO:0030517;GO:0030879;GO:0033564;GO:0042472;GO:0045773;GO:0051963;GO:0060252;GO:0060603;GO:0061643;GO:0097475;GO:0098609;GO:1903975;GO:0005515;	K06843	netrin 1 [Source:HGNC Symbol;Acc:HGNC:8029]	sp|O95631|NET1_HUMAN Netrin-1 OS=Homo sapiens OX=9606 GN=NTN1 PE=1 SV=2	veNOG04988	W	GO:0001764//neuron migration;GO:0007097//nuclear migration;GO:0007409//axonogenesis;GO:0007411//axon guidance;GO:0008283//cell population proliferation;GO:0014009//glial cell proliferation;GO:0030334//regulation of cell migration;GO:0030517//negative regulation of axon extension;GO:0030879//mammary gland development;GO:0033564//anterior/posterior axon guidance;GO:0042472//inner ear morphogenesis;…	GO:0005576//extracellular region;GO:0005604//basement membrane;GO:0005654//nucleoplasm;GO:0005737//cytoplasm;GO:0005829//cytosol;GO:0015629//actin cytoskeleton;	GO:0005515//protein binding;GO:0005515//protein binding;	ko04361(Axon regeneration);ko04360(Axon guidance)
MSTRG.100337	ENSBGRG00000026658	MSTRG.100337.1	30600	19[-]39458341-39463310	19[+]39493910-39571907	PIK3R5	GO:0005829;GO:0005944;GO:0034451;GO:0046935;GO:0005944;GO:0046935;	K21290	phosphoinositide-3-kinase regulatory subunit 5 [Source:HGNC Symbol;Acc:HGNC:30035]	sp|O02696|PI3R5_PIG Phosphoinositide 3-kinase regulatory subunit 5 OS=Sus scrofa OX=9823 GN=PIK3R5 PE=1 SV=1	veNOG10696	T	-	GO:0005829//cytosol;GO:0005944//phosphatidylinositol 3-kinase complex, class IB;GO:0034451//centriolar satellite;GO:0005944//phosphatidylinositol 3-kinase complex, class IB;	GO:0046935//1-phosphatidylinositol-3-kinase regulator activity;GO:0046935//1-phosphatidylinositol-3-kinase regulator activity;	ko05167(Kaposi sarcoma-associated herpesvirus infection);ko05145(Toxoplasmosis);ko04921(Oxytocin signaling pathway);ko04725(Cholinergic synapse);ko04611(Platelet activation);ko04371(Apelin signaling pathway);ko04261(Adrenergic signaling in cardiomyocytes);ko04151(PI3K-Akt signaling pathway);ko04072(Phospholipase D signaling pathway);ko04062(Chemokine signaling pathway);ko04022(cGMP-PKG signaling …
MSTRG.100337	ENSBGRG00000026654	MSTRG.100337.1	0	19[-]39458341-39463310	19[-]39244108-39476067	NTN1	GO:0001764;GO:0005515;GO:0005576;GO:0005604;GO:0005654;GO:0005737;GO:0005829;GO:0007097;GO:0007409;GO:0007411;GO:0008283;GO:0014009;GO:0015629;GO:0030334;GO:0030517;GO:0030879;GO:0033564;GO:0042472;GO:0045773;GO:0051963;GO:0060252;GO:0060603;GO:0061643;GO:0097475;GO:0098609;GO:1903975;GO:0005515;	K06843	netrin 1 [Source:HGNC Symbol;Acc:HGNC:8029]	sp|O95631|NET1_HUMAN Netrin-1 OS=Homo sapiens OX=9606 GN=NTN1 PE=1 SV=2	veNOG04988	W	GO:0001764//neuron migration;GO:0007097//nuclear migration;GO:0007409//axonogenesis;GO:0007411//axon guidance;GO:0008283//cell population proliferation;GO:0014009//glial cell proliferation;GO:0030334//regulation of cell migration;GO:0030517//negative regulation of axon extension;GO:0030879//mammary gland development;GO:0033564//anterior/posterior axon guidance;GO:0042472//inner ear morphogenesis;…	GO:0005576//extracellular region;GO:0005604//basement membrane;GO:0005654//nucleoplasm;GO:0005737//cytoplasm;GO:0005829//cytosol;GO:0015629//actin cytoskeleton;	GO:0005515//protein binding;GO:0005515//protein binding;	ko04361(Axon regeneration);ko04360(Axon guidance)
MSTRG.100361	ENSBGRG00000026658	MSTRG.100361.1,MSTRG.100361.2	0	19[+]39503232-39504772	19[+]39493910-39571907	PIK3R5	GO:0005829;GO:0005944;GO:0034451;GO:0046935;GO:0005944;GO:0046935;	K21290	phosphoinositide-3-kinase regulatory subunit 5 [Source:HGNC Symbol;Acc:HGNC:30035]	sp|O02696|PI3R5_PIG Phosphoinositide 3-kinase regulatory subunit 5 OS=Sus scrofa OX=9823 GN=PIK3R5 PE=1 SV=1	veNOG10696	T	-	GO:0005829//cytosol;GO:0005944//phosphatidylinositol 3-kinase complex, class IB;GO:0034451//centriolar satellite;GO:0005944//phosphatidylinositol 3-kinase complex, class IB;	GO:0046935//1-phosphatidylinositol-3-kinase regulator activity;GO:0046935//1-phosphatidylinositol-3-kinase regulator activity;	ko05167(Kaposi sarcoma-associated herpesvirus infection);ko05145(Toxoplasmosis);ko04921(Oxytocin signaling pathway);ko04725(Cholinergic synapse);ko04611(Platelet activation);ko04371(Apelin signaling pathway);ko04261(Adrenergic signaling in cardiomyocytes);ko04151(PI3K-Akt signaling pathway);ko04072(Phospholipase D signaling pathway);ko04062(Chemokine signaling pathway);ko04022(cGMP-PKG signaling …
MSTRG.100361	ENSBGRG00000026668	MSTRG.100361.1,MSTRG.100361.2	82048	19[+]39503232-39504772	19[+]39586820-39643341	PIK3R6	GO:0005944;GO:0046935;GO:0005944;GO:0005944;GO:0007186;GO:0016020;GO:0042269;GO:0043406;GO:0045582;GO:0045766;GO:0046934;GO:0046935;GO:0046935;GO:0005944;GO:0046935;GO:0005944;GO:0046935;GO:0005944;GO:0046935;GO:0005944;GO:0046935;	K21290	phosphoinositide-3-kinase regulatory subunit 6 [Source:HGNC Symbol;Acc:HGNC:27101]	sp|Q5UE93|PI3R6_HUMAN Phosphoinositide 3-kinase regulatory subunit 6 OS=Homo sapiens OX=9606 GN=PIK3R6 PE=1 SV=1	veNOG08882	R	GO:0007186//G protein-coupled receptor signaling pathway;GO:0042269//regulation of natural killer cell mediated cytotoxicity;GO:0043406//positive regulation of MAP kinase activity;GO:0045582//positive regulation of T cell differentiation;GO:0045766//positive regulation of angiogenesis;	GO:0005944//phosphatidylinositol 3-kinase complex, class IB;GO:0005944//phosphatidylinositol 3-kinase complex, class IB;GO:0005944//phosphatidylinositol 3-kinase complex, class IB;GO:0016020//membrane;GO:0005944//phosphatidylinositol 3-kinase complex, class IB;GO:0005944//phosphatidylinositol 3-kinase complex, class IB;GO:0005944//phosphatidylinositol 3-kinase complex, class IB;GO:0005944//phosph…	GO:0046935//1-phosphatidylinositol-3-kinase regulator activity;GO:0046934//phosphatidylinositol-4,5-bisphosphate 3-kinase activity;GO:0046935//1-phosphatidylinositol-3-kinase regulator activity;GO:0046935//1-phosphatidylinositol-3-kinase regulator activity;GO:0046935//1-phosphatidylinositol-3-kinase regulator activity;GO:0046935//1-phosphatidylinositol-3-kinase regulator activity;GO:0046935//1-ph…	ko05167(Kaposi sarcoma-associated herpesvirus infection);ko05145(Toxoplasmosis);ko04921(Oxytocin signaling pathway);ko04725(Cholinergic synapse);ko04611(Platelet activation);ko04371(Apelin signaling pathway);ko04261(Adrenergic signaling in cardiomyocytes);ko04151(PI3K-Akt signaling pathway);ko04072(Phospholipase D signaling pathway);ko04062(Chemokine signaling pathway);ko04022(cGMP-PKG signaling …
MSTRG.100361	ENSBGRG00000026654	MSTRG.100361.1,MSTRG.100361.2	27165	19[+]39503232-39504772	19[-]39244108-39476067	NTN1	GO:0001764;GO:0005515;GO:0005576;GO:0005604;GO:0005654;GO:0005737;GO:0005829;GO:0007097;GO:0007409;GO:0007411;GO:0008283;GO:0014009;GO:0015629;GO:0030334;GO:0030517;GO:0030879;GO:0033564;GO:0042472;GO:0045773;GO:0051963;GO:0060252;GO:0060603;GO:0061643;GO:0097475;GO:0098609;GO:1903975;GO:0005515;	K06843	netrin 1 [Source:HGNC Symbol;Acc:HGNC:8029]	sp|O95631|NET1_HUMAN Netrin-1 OS=Homo sapiens OX=9606 GN=NTN1 PE=1 SV=2	veNOG04988	W	GO:0001764//neuron migration;GO:0007097//nuclear migration;GO:0007409//axonogenesis;GO:0007411//axon guidance;GO:0008283//cell population proliferation;GO:0014009//glial cell proliferation;GO:0030334//regulation of cell migration;GO:0030517//negative regulation of axon extension;GO:0030879//mammary gland development;GO:0033564//anterior/posterior axon guidance;GO:0042472//inner ear morphogenesis;…	GO:0005576//extracellular region;GO:0005604//basement membrane;GO:0005654//nucleoplasm;GO:0005737//cytoplasm;GO:0005829//cytosol;GO:0015629//actin cytoskeleton;	GO:0005515//protein binding;GO:0005515//protein binding;	ko04361(Axon regeneration);ko04360(Axon guidance)
MSTRG.100367	ENSBGRG00000026658	MSTRG.100367.1	0	19[+]39512628-39513828	19[+]39493910-39571907	PIK3R5	GO:0005829;GO:0005944;GO:0034451;GO:0046935;GO:0005944;GO:0046935;	K21290	phosphoinositide-3-kinase regulatory subunit 5 [Source:HGNC Symbol;Acc:HGNC:30035]	sp|O02696|PI3R5_PIG Phosphoinositide 3-kinase regulatory subunit 5 OS=Sus scrofa OX=9823 GN=PIK3R5 PE=1 SV=1	veNOG10696	T	-	GO:0005829//cytosol;GO:0005944//phosphatidylinositol 3-kinase complex, class IB;GO:0034451//centriolar satellite;GO:0005944//phosphatidylinositol 3-kinase complex, class IB;	GO:0046935//1-phosphatidylinositol-3-kinase regulator activity;GO:0046935//1-phosphatidylinositol-3-kinase regulator activity;	ko05167(Kaposi sarcoma-associated herpesvirus infection);ko05145(Toxoplasmosis);ko04921(Oxytocin signaling pathway);ko04725(Cholinergic synapse);ko04611(Platelet activation);ko04371(Apelin signaling pathway);ko04261(Adrenergic signaling in cardiomyocytes);ko04151(PI3K-Akt signaling pathway);ko04072(Phospholipase D signaling pathway);ko04062(Chemokine signaling pathway);ko04022(cGMP-PKG signaling …
MSTRG.100367	ENSBGRG00000026668	MSTRG.100367.1	72992	19[+]39512628-39513828	19[+]39586820-39643341	PIK3R6	GO:0005944;GO:0046935;GO:0005944;GO:0005944;GO:0007186;GO:0016020;GO:0042269;GO:0043406;GO:0045582;GO:0045766;GO:0046934;GO:0046935;GO:0046935;GO:0005944;GO:0046935;GO:0005944;GO:0046935;GO:0005944;GO:0046935;GO:0005944;GO:0046935;	K21290	phosphoinositide-3-kinase regulatory subunit 6 [Source:HGNC Symbol;Acc:HGNC:27101]	sp|Q5UE93|PI3R6_HUMAN Phosphoinositide 3-kinase regulatory subunit 6 OS=Homo sapiens OX=9606 GN=PIK3R6 PE=1 SV=1	veNOG08882	R	GO:0007186//G protein-coupled receptor signaling pathway;GO:0042269//regulation of natural killer cell mediated cytotoxicity;GO:0043406//positive regulation of MAP kinase activity;GO:0045582//positive regulation of T cell differentiation;GO:0045766//positive regulation of angiogenesis;	GO:0005944//phosphatidylinositol 3-kinase complex, class IB;GO:0005944//phosphatidylinositol 3-kinase complex, class IB;GO:0005944//phosphatidylinositol 3-kinase complex, class IB;GO:0016020//membrane;GO:0005944//phosphatidylinositol 3-kinase complex, class IB;GO:0005944//phosphatidylinositol 3-kinase complex, class IB;GO:0005944//phosphatidylinositol 3-kinase complex, class IB;GO:0005944//phosph…	GO:0046935//1-phosphatidylinositol-3-kinase regulator activity;GO:0046934//phosphatidylinositol-4,5-bisphosphate 3-kinase activity;GO:0046935//1-phosphatidylinositol-3-kinase regulator activity;GO:0046935//1-phosphatidylinositol-3-kinase regulator activity;GO:0046935//1-phosphatidylinositol-3-kinase regulator activity;GO:0046935//1-phosphatidylinositol-3-kinase regulator activity;GO:0046935//1-ph…	ko05167(Kaposi sarcoma-associated herpesvirus infection);ko05145(Toxoplasmosis);ko04921(Oxytocin signaling pathway);ko04725(Cholinergic synapse);ko04611(Platelet activation);ko04371(Apelin signaling pathway);ko04261(Adrenergic signaling in cardiomyocytes);ko04151(PI3K-Akt signaling pathway);ko04072(Phospholipase D signaling pathway);ko04062(Chemokine signaling pathway);ko04022(cGMP-PKG signaling …
MSTRG.100367	ENSBGRG00000026654	MSTRG.100367.1	36561	19[+]39512628-39513828	19[-]39244108-39476067	NTN1	GO:0001764;GO:0005515;GO:0005576;GO:0005604;GO:0005654;GO:0005737;GO:0005829;GO:0007097;GO:0007409;GO:0007411;GO:0008283;GO:0014009;GO:0015629;GO:0030334;GO:0030517;GO:0030879;GO:0033564;GO:0042472;GO:0045773;GO:0051963;GO:0060252;GO:0060603;GO:0061643;GO:0097475;GO:0098609;GO:1903975;GO:0005515;	K06843	netrin 1 [Source:HGNC Symbol;Acc:HGNC:8029]	sp|O95631|NET1_HUMAN Netrin-1 OS=Homo sapiens OX=9606 GN=NTN1 PE=1 SV=2	veNOG04988	W	GO:0001764//neuron migration;GO:0007097//nuclear migration;GO:0007409//axonogenesis;GO:0007411//axon guidance;GO:0008283//cell population proliferation;GO:0014009//glial cell proliferation;GO:0030334//regulation of cell migration;GO:0030517//negative regulation of axon extension;GO:0030879//mammary gland development;GO:0033564//anterior/posterior axon guidance;GO:0042472//inner ear morphogenesis;…	GO:0005576//extracellular region;GO:0005604//basement membrane;GO:0005654//nucleoplasm;GO:0005737//cytoplasm;GO:0005829//cytosol;GO:0015629//actin cytoskeleton;	GO:0005515//protein binding;GO:0005515//protein binding;	ko04361(Axon regeneration);ko04360(Axon guidance)
MSTRG.100371	ENSBGRG00000026658	MSTRG.100371.1	0	19[+]39520944-39522306	19[+]39493910-39571907	PIK3R5	GO:0005829;GO:0005944;GO:0034451;GO:0046935;GO:0005944;GO:0046935;	K21290	phosphoinositide-3-kinase regulatory subunit 5 [Source:HGNC Symbol;Acc:HGNC:30035]	sp|O02696|PI3R5_PIG Phosphoinositide 3-kinase regulatory subunit 5 OS=Sus scrofa OX=9823 GN=PIK3R5 PE=1 SV=1	veNOG10696	T	-	GO:0005829//cytosol;GO:0005944//phosphatidylinositol 3-kinase complex, class IB;GO:0034451//centriolar satellite;GO:0005944//phosphatidylinositol 3-kinase complex, class IB;	GO:0046935//1-phosphatidylinositol-3-kinase regulator activity;GO:0046935//1-phosphatidylinositol-3-kinase regulator activity;	ko05167(Kaposi sarcoma-associated herpesvirus infection);ko05145(Toxoplasmosis);ko04921(Oxytocin signaling pathway);ko04725(Cholinergic synapse);ko04611(Platelet activation);ko04371(Apelin signaling pathway);ko04261(Adrenergic signaling in cardiomyocytes);ko04151(PI3K-Akt signaling pathway);ko04072(Phospholipase D signaling pathway);ko04062(Chemokine signaling pathway);ko04022(cGMP-PKG signaling …
MSTRG.100371	ENSBGRG00000026668	MSTRG.100371.1	64514	19[+]39520944-39522306	19[+]39586820-39643341	PIK3R6	GO:0005944;GO:0046935;GO:0005944;GO:0005944;GO:0007186;GO:0016020;GO:0042269;GO:0043406;GO:0045582;GO:0045766;GO:0046934;GO:0046935;GO:0046935;GO:0005944;GO:0046935;GO:0005944;GO:0046935;GO:0005944;GO:0046935;GO:0005944;GO:0046935;	K21290	phosphoinositide-3-kinase regulatory subunit 6 [Source:HGNC Symbol;Acc:HGNC:27101]	sp|Q5UE93|PI3R6_HUMAN Phosphoinositide 3-kinase regulatory subunit 6 OS=Homo sapiens OX=9606 GN=PIK3R6 PE=1 SV=1	veNOG08882	R	GO:0007186//G protein-coupled receptor signaling pathway;GO:0042269//regulation of natural killer cell mediated cytotoxicity;GO:0043406//positive regulation of MAP kinase activity;GO:0045582//positive regulation of T cell differentiation;GO:0045766//positive regulation of angiogenesis;	GO:0005944//phosphatidylinositol 3-kinase complex, class IB;GO:0005944//phosphatidylinositol 3-kinase complex, class IB;GO:0005944//phosphatidylinositol 3-kinase complex, class IB;GO:0016020//membrane;GO:0005944//phosphatidylinositol 3-kinase complex, class IB;GO:0005944//phosphatidylinositol 3-kinase complex, class IB;GO:0005944//phosphatidylinositol 3-kinase complex, class IB;GO:0005944//phosph…	GO:0046935//1-phosphatidylinositol-3-kinase regulator activity;GO:0046934//phosphatidylinositol-4,5-bisphosphate 3-kinase activity;GO:0046935//1-phosphatidylinositol-3-kinase regulator activity;GO:0046935//1-phosphatidylinositol-3-kinase regulator activity;GO:0046935//1-phosphatidylinositol-3-kinase regulator activity;GO:0046935//1-phosphatidylinositol-3-kinase regulator activity;GO:0046935//1-ph…	ko05167(Kaposi sarcoma-associated herpesvirus infection);ko05145(Toxoplasmosis);ko04921(Oxytocin signaling pathway);ko04725(Cholinergic synapse);ko04611(Platelet activation);ko04371(Apelin signaling pathway);ko04261(Adrenergic signaling in cardiomyocytes);ko04151(PI3K-Akt signaling pathway);ko04072(Phospholipase D signaling pathway);ko04062(Chemokine signaling pathway);ko04022(cGMP-PKG signaling …
MSTRG.100371	ENSBGRG00000026654	MSTRG.100371.1	44877	19[+]39520944-39522306	19[-]39244108-39476067	NTN1	GO:0001764;GO:0005515;GO:0005576;GO:0005604;GO:0005654;GO:0005737;GO:0005829;GO:0007097;GO:0007409;GO:0007411;GO:0008283;GO:0014009;GO:0015629;GO:0030334;GO:0030517;GO:0030879;GO:0033564;GO:0042472;GO:0045773;GO:0051963;GO:0060252;GO:0060603;GO:0061643;GO:0097475;GO:0098609;GO:1903975;GO:0005515;	K06843	netrin 1 [Source:HGNC Symbol;Acc:HGNC:8029]	sp|O95631|NET1_HUMAN Netrin-1 OS=Homo sapiens OX=9606 GN=NTN1 PE=1 SV=2	veNOG04988	W	GO:0001764//neuron migration;GO:0007097//nuclear migration;GO:0007409//axonogenesis;GO:0007411//axon guidance;GO:0008283//cell population proliferation;GO:0014009//glial cell proliferation;GO:0030334//regulation of cell migration;GO:0030517//negative regulation of axon extension;GO:0030879//mammary gland development;GO:0033564//anterior/posterior axon guidance;GO:0042472//inner ear morphogenesis;…	GO:0005576//extracellular region;GO:0005604//basement membrane;GO:0005654//nucleoplasm;GO:0005737//cytoplasm;GO:0005829//cytosol;GO:0015629//actin cytoskeleton;	GO:0005515//protein binding;GO:0005515//protein binding;	ko04361(Axon regeneration);ko04360(Axon guidance)
MSTRG.100383	ENSBGRG00000026658	MSTRG.100383.2	0	19[+]39540653-39541372	19[+]39493910-39571907	PIK3R5	GO:0005829;GO:0005944;GO:0034451;GO:0046935;GO:0005944;GO:0046935;	K21290	phosphoinositide-3-kinase regulatory subunit 5 [Source:HGNC Symbol;Acc:HGNC:30035]	sp|O02696|PI3R5_PIG Phosphoinositide 3-kinase regulatory subunit 5 OS=Sus scrofa OX=9823 GN=PIK3R5 PE=1 SV=1	veNOG10696	T	-	GO:0005829//cytosol;GO:0005944//phosphatidylinositol 3-kinase complex, class IB;GO:0034451//centriolar satellite;GO:0005944//phosphatidylinositol 3-kinase complex, class IB;	GO:0046935//1-phosphatidylinositol-3-kinase regulator activity;GO:0046935//1-phosphatidylinositol-3-kinase regulator activity;	ko05167(Kaposi sarcoma-associated herpesvirus infection);ko05145(Toxoplasmosis);ko04921(Oxytocin signaling pathway);ko04725(Cholinergic synapse);ko04611(Platelet activation);ko04371(Apelin signaling pathway);ko04261(Adrenergic signaling in cardiomyocytes);ko04151(PI3K-Akt signaling pathway);ko04072(Phospholipase D signaling pathway);ko04062(Chemokine signaling pathway);ko04022(cGMP-PKG signaling …
MSTRG.100383	ENSBGRG00000026668	MSTRG.100383.2	45448	19[+]39540653-39541372	19[+]39586820-39643341	PIK3R6	GO:0005944;GO:0046935;GO:0005944;GO:0005944;GO:0007186;GO:0016020;GO:0042269;GO:0043406;GO:0045582;GO:0045766;GO:0046934;GO:0046935;GO:0046935;GO:0005944;GO:0046935;GO:0005944;GO:0046935;GO:0005944;GO:0046935;GO:0005944;GO:0046935;	K21290	phosphoinositide-3-kinase regulatory subunit 6 [Source:HGNC Symbol;Acc:HGNC:27101]	sp|Q5UE93|PI3R6_HUMAN Phosphoinositide 3-kinase regulatory subunit 6 OS=Homo sapiens OX=9606 GN=PIK3R6 PE=1 SV=1	veNOG08882	R	GO:0007186//G protein-coupled receptor signaling pathway;GO:0042269//regulation of natural killer cell mediated cytotoxicity;GO:0043406//positive regulation of MAP kinase activity;GO:0045582//positive regulation of T cell differentiation;GO:0045766//positive regulation of angiogenesis;	GO:0005944//phosphatidylinositol 3-kinase complex, class IB;GO:0005944//phosphatidylinositol 3-kinase complex, class IB;GO:0005944//phosphatidylinositol 3-kinase complex, class IB;GO:0016020//membrane;GO:0005944//phosphatidylinositol 3-kinase complex, class IB;GO:0005944//phosphatidylinositol 3-kinase complex, class IB;GO:0005944//phosphatidylinositol 3-kinase complex, class IB;GO:0005944//phosph…	GO:0046935//1-phosphatidylinositol-3-kinase regulator activity;GO:0046934//phosphatidylinositol-4,5-bisphosphate 3-kinase activity;GO:0046935//1-phosphatidylinositol-3-kinase regulator activity;GO:0046935//1-phosphatidylinositol-3-kinase regulator activity;GO:0046935//1-phosphatidylinositol-3-kinase regulator activity;GO:0046935//1-phosphatidylinositol-3-kinase regulator activity;GO:0046935//1-ph…	ko05167(Kaposi sarcoma-associated herpesvirus infection);ko05145(Toxoplasmosis);ko04921(Oxytocin signaling pathway);ko04725(Cholinergic synapse);ko04611(Platelet activation);ko04371(Apelin signaling pathway);ko04261(Adrenergic signaling in cardiomyocytes);ko04151(PI3K-Akt signaling pathway);ko04072(Phospholipase D signaling pathway);ko04062(Chemokine signaling pathway);ko04022(cGMP-PKG signaling …
MSTRG.100383	ENSBGRG00000026654	MSTRG.100383.2	64586	19[+]39540653-39541372	19[-]39244108-39476067	NTN1	GO:0001764;GO:0005515;GO:0005576;GO:0005604;GO:0005654;GO:0005737;GO:0005829;GO:0007097;GO:0007409;GO:0007411;GO:0008283;GO:0014009;GO:0015629;GO:0030334;GO:0030517;GO:0030879;GO:0033564;GO:0042472;GO:0045773;GO:0051963;GO:0060252;GO:0060603;GO:0061643;GO:0097475;GO:0098609;GO:1903975;GO:0005515;	K06843	netrin 1 [Source:HGNC Symbol;Acc:HGNC:8029]	sp|O95631|NET1_HUMAN Netrin-1 OS=Homo sapiens OX=9606 GN=NTN1 PE=1 SV=2	veNOG04988	W	GO:0001764//neuron migration;GO:0007097//nuclear migration;GO:0007409//axonogenesis;GO:0007411//axon guidance;GO:0008283//cell population proliferation;GO:0014009//glial cell proliferation;GO:0030334//regulation of cell migration;GO:0030517//negative regulation of axon extension;GO:0030879//mammary gland development;GO:0033564//anterior/posterior axon guidance;GO:0042472//inner ear morphogenesis;…	GO:0005576//extracellular region;GO:0005604//basement membrane;GO:0005654//nucleoplasm;GO:0005737//cytoplasm;GO:0005829//cytosol;GO:0015629//actin cytoskeleton;	GO:0005515//protein binding;GO:0005515//protein binding;	ko04361(Axon regeneration);ko04360(Axon guidance)
MSTRG.100423	ENSBGRG00000026685	MSTRG.100423.1	0	19[+]39814479-39815849	19[+]39771426-39899516	MYH10	GO:0000146;GO:0000281;GO:0001725;GO:0003774;GO:0005515;GO:0005524;GO:0005524;GO:0005737;GO:0005829;GO:0005844;GO:0005938;GO:0016459;GO:0016460;GO:0030048;GO:0030496;GO:0031032;GO:0032154;GO:0035613;GO:0042641;GO:0043531;GO:0048027;GO:0050714;GO:0051015;GO:0051015;GO:0097513;GO:0003774;GO:0005515;GO:0005524;GO:0016459;GO:0051015;GO:0003774;GO:0005515;GO:0005524;GO:0016459;GO:0051015;	K10352	myosin heavy chain 10 [Source:HGNC Symbol;Acc:HGNC:7568]	sp|Q27991|MYH10_BOVIN Myosin-10 OS=Bos taurus OX=9913 GN=MYH10 PE=2 SV=2	veNOG07733	Z	GO:0000281//mitotic cytokinesis;GO:0030048//actin filament-based movement;GO:0031032//actomyosin structure organization;GO:0050714//positive regulation of protein secretion;	GO:0001725//stress fiber;GO:0005737//cytoplasm;GO:0005829//cytosol;GO:0005844//polysome;GO:0005938//cell cortex;GO:0016459//myosin complex;GO:0016460//myosin II complex;GO:0030496//midbody;GO:0032154//cleavage furrow;GO:0042641//actomyosin;GO:0097513//myosin II filament;GO:0016459//myosin complex;GO:0016459//myosin complex;	GO:0000146//microfilament motor activity;GO:0003774//cytoskeletal motor activity;GO:0005515//protein binding;GO:0005524//ATP binding;GO:0005524//ATP binding;GO:0035613//RNA stem-loop binding;GO:0043531//ADP binding;GO:0048027//mRNA 5'-UTR binding;GO:0051015//actin filament binding;GO:0051015//actin filament binding;GO:0003774//cytoskeletal motor activity;GO:0005515//protein binding;GO:0005524//AT…	ko05130(Pathogenic Escherichia coli infection);ko04810(Regulation of actin cytoskeleton);ko04530(Tight junction);ko04270(Vascular smooth muscle contraction)
MSTRG.100423	ENSBGRG00000026691	MSTRG.100423.1	93318	19[+]39814479-39815849	19[-]39909167-39966431	NDEL1	GO:0007100;GO:0007399;GO:0008017;GO:0060052;GO:0000226;GO:0000776;GO:0001764;GO:0001833;GO:0005813;GO:0005815;GO:0005875;GO:0007059;GO:0007100;GO:0007100;GO:0007399;GO:0008017;GO:0008017;GO:0008021;GO:0008090;GO:0008286;GO:0010975;GO:0016477;GO:0021799;GO:0021955;GO:0030424;GO:0031252;GO:0032418;GO:0033157;GO:0042802;GO:0043014;GO:0043203;GO:0043547;GO:0047496;GO:0048487;GO:0051642;GO:0060052;GO:…	K16739	nudE neurodevelopment protein 1 like 1 [Source:HGNC Symbol;Acc:HGNC:17620]	sp|O46480|NDEL1_RABIT Nuclear distribution protein nudE-like 1 OS=Oryctolagus cuniculus OX=9986 GN=NDEL1 PE=1 SV=3	veNOG02145	Z	GO:0007100//mitotic centrosome separation;GO:0007399//nervous system development;GO:0060052//neurofilament cytoskeleton organization;GO:0000226//microtubule cytoskeleton organization;GO:0001764//neuron migration;GO:0001833//inner cell mass cell proliferation;GO:0007059//chromosome segregation;GO:0007100//mitotic centrosome separation;GO:0007100//mitotic centrosome separation;GO:0007399//nervous s…	GO:0000776//kinetochore;GO:0005813//centrosome;GO:0005815//microtubule organizing center;GO:0005875//microtubule associated complex;GO:0008021//synaptic vesicle;GO:0030424//axon;GO:0031252//cell leading edge;GO:0043203//axon hillock;GO:0060053//neurofilament cytoskeleton;	GO:0008017//microtubule binding;GO:0008017//microtubule binding;GO:0008017//microtubule binding;GO:0042802//identical protein binding;GO:0043014//alpha-tubulin binding;GO:0048487//beta-tubulin binding;GO:0008017//microtubule binding;GO:0008017//microtubule binding;GO:0008017//microtubule binding;	-
MSTRG.100424	ENSBGRG00000026685	MSTRG.100424.1	0	19[+]39865838-39867178	19[+]39771426-39899516	MYH10	GO:0000146;GO:0000281;GO:0001725;GO:0003774;GO:0005515;GO:0005524;GO:0005524;GO:0005737;GO:0005829;GO:0005844;GO:0005938;GO:0016459;GO:0016460;GO:0030048;GO:0030496;GO:0031032;GO:0032154;GO:0035613;GO:0042641;GO:0043531;GO:0048027;GO:0050714;GO:0051015;GO:0051015;GO:0097513;GO:0003774;GO:0005515;GO:0005524;GO:0016459;GO:0051015;GO:0003774;GO:0005515;GO:0005524;GO:0016459;GO:0051015;	K10352	myosin heavy chain 10 [Source:HGNC Symbol;Acc:HGNC:7568]	sp|Q27991|MYH10_BOVIN Myosin-10 OS=Bos taurus OX=9913 GN=MYH10 PE=2 SV=2	veNOG07733	Z	GO:0000281//mitotic cytokinesis;GO:0030048//actin filament-based movement;GO:0031032//actomyosin structure organization;GO:0050714//positive regulation of protein secretion;	GO:0001725//stress fiber;GO:0005737//cytoplasm;GO:0005829//cytosol;GO:0005844//polysome;GO:0005938//cell cortex;GO:0016459//myosin complex;GO:0016460//myosin II complex;GO:0030496//midbody;GO:0032154//cleavage furrow;GO:0042641//actomyosin;GO:0097513//myosin II filament;GO:0016459//myosin complex;GO:0016459//myosin complex;	GO:0000146//microfilament motor activity;GO:0003774//cytoskeletal motor activity;GO:0005515//protein binding;GO:0005524//ATP binding;GO:0005524//ATP binding;GO:0035613//RNA stem-loop binding;GO:0043531//ADP binding;GO:0048027//mRNA 5'-UTR binding;GO:0051015//actin filament binding;GO:0051015//actin filament binding;GO:0003774//cytoskeletal motor activity;GO:0005515//protein binding;GO:0005524//AT…	ko05130(Pathogenic Escherichia coli infection);ko04810(Regulation of actin cytoskeleton);ko04530(Tight junction);ko04270(Vascular smooth muscle contraction)
MSTRG.100424	ENSBGRG00000026691	MSTRG.100424.1	41989	19[+]39865838-39867178	19[-]39909167-39966431	NDEL1	GO:0007100;GO:0007399;GO:0008017;GO:0060052;GO:0000226;GO:0000776;GO:0001764;GO:0001833;GO:0005813;GO:0005815;GO:0005875;GO:0007059;GO:0007100;GO:0007100;GO:0007399;GO:0008017;GO:0008017;GO:0008021;GO:0008090;GO:0008286;GO:0010975;GO:0016477;GO:0021799;GO:0021955;GO:0030424;GO:0031252;GO:0032418;GO:0033157;GO:0042802;GO:0043014;GO:0043203;GO:0043547;GO:0047496;GO:0048487;GO:0051642;GO:0060052;GO:…	K16739	nudE neurodevelopment protein 1 like 1 [Source:HGNC Symbol;Acc:HGNC:17620]	sp|O46480|NDEL1_RABIT Nuclear distribution protein nudE-like 1 OS=Oryctolagus cuniculus OX=9986 GN=NDEL1 PE=1 SV=3	veNOG02145	Z	GO:0007100//mitotic centrosome separation;GO:0007399//nervous system development;GO:0060052//neurofilament cytoskeleton organization;GO:0000226//microtubule cytoskeleton organization;GO:0001764//neuron migration;GO:0001833//inner cell mass cell proliferation;GO:0007059//chromosome segregation;GO:0007100//mitotic centrosome separation;GO:0007100//mitotic centrosome separation;GO:0007399//nervous s…	GO:0000776//kinetochore;GO:0005813//centrosome;GO:0005815//microtubule organizing center;GO:0005875//microtubule associated complex;GO:0008021//synaptic vesicle;GO:0030424//axon;GO:0031252//cell leading edge;GO:0043203//axon hillock;GO:0060053//neurofilament cytoskeleton;	GO:0008017//microtubule binding;GO:0008017//microtubule binding;GO:0008017//microtubule binding;GO:0042802//identical protein binding;GO:0043014//alpha-tubulin binding;GO:0048487//beta-tubulin binding;GO:0008017//microtubule binding;GO:0008017//microtubule binding;GO:0008017//microtubule binding;	-
MSTRG.100431	ENSBGRG00000026699	MSTRG.100431.9	76587	19[-]39914620-39917826	19[+]39994413-40003153	-	GO:0003723;GO:0003735;GO:0005840;GO:0006412;GO:0006977;GO:0015934;GO:0022625;GO:0071479;GO:1902167;	K02898	ribosomal protein L26 [Source:HGNC Symbol;Acc:HGNC:10327]	sp|P61257|RL26_BOVIN 60S ribosomal protein L26 OS=Bos taurus OX=9913 GN=RPL26 PE=2 SV=1	veNOG14999	J	GO:0006412//translation;GO:0006977//DNA damage response, signal transduction by p53 class mediator resulting in cell cycle arrest;GO:0071479//cellular response to ionizing radiation;GO:1902167//positive regulation of intrinsic apoptotic signaling pathway in response to DNA damage by p53 class mediator;	GO:0005840//ribosome;GO:0015934//large ribosomal subunit;GO:0022625//cytosolic large ribosomal subunit;	GO:0003723//RNA binding;GO:0003735//structural constituent of ribosome;	ko05171(Coronavirus disease - COVID-19);ko03010(Ribosome)
MSTRG.100431	ENSBGRG00000026685	MSTRG.100431.9	15104	19[-]39914620-39917826	19[+]39771426-39899516	MYH10	GO:0000146;GO:0000281;GO:0001725;GO:0003774;GO:0005515;GO:0005524;GO:0005524;GO:0005737;GO:0005829;GO:0005844;GO:0005938;GO:0016459;GO:0016460;GO:0030048;GO:0030496;GO:0031032;GO:0032154;GO:0035613;GO:0042641;GO:0043531;GO:0048027;GO:0050714;GO:0051015;GO:0051015;GO:0097513;GO:0003774;GO:0005515;GO:0005524;GO:0016459;GO:0051015;GO:0003774;GO:0005515;GO:0005524;GO:0016459;GO:0051015;	K10352	myosin heavy chain 10 [Source:HGNC Symbol;Acc:HGNC:7568]	sp|Q27991|MYH10_BOVIN Myosin-10 OS=Bos taurus OX=9913 GN=MYH10 PE=2 SV=2	veNOG07733	Z	GO:0000281//mitotic cytokinesis;GO:0030048//actin filament-based movement;GO:0031032//actomyosin structure organization;GO:0050714//positive regulation of protein secretion;	GO:0001725//stress fiber;GO:0005737//cytoplasm;GO:0005829//cytosol;GO:0005844//polysome;GO:0005938//cell cortex;GO:0016459//myosin complex;GO:0016460//myosin II complex;GO:0030496//midbody;GO:0032154//cleavage furrow;GO:0042641//actomyosin;GO:0097513//myosin II filament;GO:0016459//myosin complex;GO:0016459//myosin complex;	GO:0000146//microfilament motor activity;GO:0003774//cytoskeletal motor activity;GO:0005515//protein binding;GO:0005524//ATP binding;GO:0005524//ATP binding;GO:0035613//RNA stem-loop binding;GO:0043531//ADP binding;GO:0048027//mRNA 5'-UTR binding;GO:0051015//actin filament binding;GO:0051015//actin filament binding;GO:0003774//cytoskeletal motor activity;GO:0005515//protein binding;GO:0005524//AT…	ko05130(Pathogenic Escherichia coli infection);ko04810(Regulation of actin cytoskeleton);ko04530(Tight junction);ko04270(Vascular smooth muscle contraction)
MSTRG.100431	ENSBGRG00000026700	MSTRG.100431.9	84285	19[-]39914620-39917826	19[+]40002111-40007167	KRBA2	GO:0003676;GO:0015074;	-	KRAB-A domain containing 2 [Source:HGNC Symbol;Acc:HGNC:26989]	sp|Q6ZNG9|KRBA2_HUMAN KRAB-A domain-containing protein 2 OS=Homo sapiens OX=9606 GN=KRBA2 PE=1 SV=1	opiNOG21659;veNOG13496	R	GO:0015074//DNA integration;	-	GO:0003676//nucleic acid binding;	-
MSTRG.100431	ENSBGRG00000026691	MSTRG.100431.9	0	19[-]39914620-39917826	19[-]39909167-39966431	NDEL1	GO:0007100;GO:0007399;GO:0008017;GO:0060052;GO:0000226;GO:0000776;GO:0001764;GO:0001833;GO:0005813;GO:0005815;GO:0005875;GO:0007059;GO:0007100;GO:0007100;GO:0007399;GO:0008017;GO:0008017;GO:0008021;GO:0008090;GO:0008286;GO:0010975;GO:0016477;GO:0021799;GO:0021955;GO:0030424;GO:0031252;GO:0032418;GO:0033157;GO:0042802;GO:0043014;GO:0043203;GO:0043547;GO:0047496;GO:0048487;GO:0051642;GO:0060052;GO:…	K16739	nudE neurodevelopment protein 1 like 1 [Source:HGNC Symbol;Acc:HGNC:17620]	sp|O46480|NDEL1_RABIT Nuclear distribution protein nudE-like 1 OS=Oryctolagus cuniculus OX=9986 GN=NDEL1 PE=1 SV=3	veNOG02145	Z	GO:0007100//mitotic centrosome separation;GO:0007399//nervous system development;GO:0060052//neurofilament cytoskeleton organization;GO:0000226//microtubule cytoskeleton organization;GO:0001764//neuron migration;GO:0001833//inner cell mass cell proliferation;GO:0007059//chromosome segregation;GO:0007100//mitotic centrosome separation;GO:0007100//mitotic centrosome separation;GO:0007399//nervous s…	GO:0000776//kinetochore;GO:0005813//centrosome;GO:0005815//microtubule organizing center;GO:0005875//microtubule associated complex;GO:0008021//synaptic vesicle;GO:0030424//axon;GO:0031252//cell leading edge;GO:0043203//axon hillock;GO:0060053//neurofilament cytoskeleton;	GO:0008017//microtubule binding;GO:0008017//microtubule binding;GO:0008017//microtubule binding;GO:0042802//identical protein binding;GO:0043014//alpha-tubulin binding;GO:0048487//beta-tubulin binding;GO:0008017//microtubule binding;GO:0008017//microtubule binding;GO:0008017//microtubule binding;	-
MSTRG.100431	ENSBGRG00000026698	MSTRG.100431.9	68993	19[-]39914620-39917826	19[+]39986819-39987454	RNF222	-	-	ring finger protein 222 [Source:HGNC Symbol;Acc:HGNC:34517]	sp|Q8CEF8|RN222_MOUSE RING finger protein 222 OS=Mus musculus OX=10090 GN=Rnf222 PE=2 SV=2	veNOG12357;opiNOG40576	O	-	-	-	-
MSTRG.100432	ENSBGRG00000026699	MSTRG.100432.1	69604	19[-]39920003-39924809	19[+]39994413-40003153	-	GO:0003723;GO:0003735;GO:0005840;GO:0006412;GO:0006977;GO:0015934;GO:0022625;GO:0071479;GO:1902167;	K02898	ribosomal protein L26 [Source:HGNC Symbol;Acc:HGNC:10327]	sp|P61257|RL26_BOVIN 60S ribosomal protein L26 OS=Bos taurus OX=9913 GN=RPL26 PE=2 SV=1	veNOG14999	J	GO:0006412//translation;GO:0006977//DNA damage response, signal transduction by p53 class mediator resulting in cell cycle arrest;GO:0071479//cellular response to ionizing radiation;GO:1902167//positive regulation of intrinsic apoptotic signaling pathway in response to DNA damage by p53 class mediator;	GO:0005840//ribosome;GO:0015934//large ribosomal subunit;GO:0022625//cytosolic large ribosomal subunit;	GO:0003723//RNA binding;GO:0003735//structural constituent of ribosome;	ko05171(Coronavirus disease - COVID-19);ko03010(Ribosome)
MSTRG.100432	ENSBGRG00000026685	MSTRG.100432.1	20487	19[-]39920003-39924809	19[+]39771426-39899516	MYH10	GO:0000146;GO:0000281;GO:0001725;GO:0003774;GO:0005515;GO:0005524;GO:0005524;GO:0005737;GO:0005829;GO:0005844;GO:0005938;GO:0016459;GO:0016460;GO:0030048;GO:0030496;GO:0031032;GO:0032154;GO:0035613;GO:0042641;GO:0043531;GO:0048027;GO:0050714;GO:0051015;GO:0051015;GO:0097513;GO:0003774;GO:0005515;GO:0005524;GO:0016459;GO:0051015;GO:0003774;GO:0005515;GO:0005524;GO:0016459;GO:0051015;	K10352	myosin heavy chain 10 [Source:HGNC Symbol;Acc:HGNC:7568]	sp|Q27991|MYH10_BOVIN Myosin-10 OS=Bos taurus OX=9913 GN=MYH10 PE=2 SV=2	veNOG07733	Z	GO:0000281//mitotic cytokinesis;GO:0030048//actin filament-based movement;GO:0031032//actomyosin structure organization;GO:0050714//positive regulation of protein secretion;	GO:0001725//stress fiber;GO:0005737//cytoplasm;GO:0005829//cytosol;GO:0005844//polysome;GO:0005938//cell cortex;GO:0016459//myosin complex;GO:0016460//myosin II complex;GO:0030496//midbody;GO:0032154//cleavage furrow;GO:0042641//actomyosin;GO:0097513//myosin II filament;GO:0016459//myosin complex;GO:0016459//myosin complex;	GO:0000146//microfilament motor activity;GO:0003774//cytoskeletal motor activity;GO:0005515//protein binding;GO:0005524//ATP binding;GO:0005524//ATP binding;GO:0035613//RNA stem-loop binding;GO:0043531//ADP binding;GO:0048027//mRNA 5'-UTR binding;GO:0051015//actin filament binding;GO:0051015//actin filament binding;GO:0003774//cytoskeletal motor activity;GO:0005515//protein binding;GO:0005524//AT…	ko05130(Pathogenic Escherichia coli infection);ko04810(Regulation of actin cytoskeleton);ko04530(Tight junction);ko04270(Vascular smooth muscle contraction)
MSTRG.100432	ENSBGRG00000026702	MSTRG.100432.1	95555	19[-]39920003-39924809	19[-]40020364-40025692	-	-	K25637	-	sp|Q2M2E3|ODFP4_HUMAN Outer dense fiber protein 4 OS=Homo sapiens OX=9606 GN=ODF4 PE=1 SV=2	veNOG12743	S	-	-	-	-
MSTRG.100432	ENSBGRG00000026700	MSTRG.100432.1	77302	19[-]39920003-39924809	19[+]40002111-40007167	KRBA2	GO:0003676;GO:0015074;	-	KRAB-A domain containing 2 [Source:HGNC Symbol;Acc:HGNC:26989]	sp|Q6ZNG9|KRBA2_HUMAN KRAB-A domain-containing protein 2 OS=Homo sapiens OX=9606 GN=KRBA2 PE=1 SV=1	opiNOG21659;veNOG13496	R	GO:0015074//DNA integration;	-	GO:0003676//nucleic acid binding;	-
MSTRG.100432	ENSBGRG00000026691	MSTRG.100432.1	0	19[-]39920003-39924809	19[-]39909167-39966431	NDEL1	GO:0007100;GO:0007399;GO:0008017;GO:0060052;GO:0000226;GO:0000776;GO:0001764;GO:0001833;GO:0005813;GO:0005815;GO:0005875;GO:0007059;GO:0007100;GO:0007100;GO:0007399;GO:0008017;GO:0008017;GO:0008021;GO:0008090;GO:0008286;GO:0010975;GO:0016477;GO:0021799;GO:0021955;GO:0030424;GO:0031252;GO:0032418;GO:0033157;GO:0042802;GO:0043014;GO:0043203;GO:0043547;GO:0047496;GO:0048487;GO:0051642;GO:0060052;GO:…	K16739	nudE neurodevelopment protein 1 like 1 [Source:HGNC Symbol;Acc:HGNC:17620]	sp|O46480|NDEL1_RABIT Nuclear distribution protein nudE-like 1 OS=Oryctolagus cuniculus OX=9986 GN=NDEL1 PE=1 SV=3	veNOG02145	Z	GO:0007100//mitotic centrosome separation;GO:0007399//nervous system development;GO:0060052//neurofilament cytoskeleton organization;GO:0000226//microtubule cytoskeleton organization;GO:0001764//neuron migration;GO:0001833//inner cell mass cell proliferation;GO:0007059//chromosome segregation;GO:0007100//mitotic centrosome separation;GO:0007100//mitotic centrosome separation;GO:0007399//nervous s…	GO:0000776//kinetochore;GO:0005813//centrosome;GO:0005815//microtubule organizing center;GO:0005875//microtubule associated complex;GO:0008021//synaptic vesicle;GO:0030424//axon;GO:0031252//cell leading edge;GO:0043203//axon hillock;GO:0060053//neurofilament cytoskeleton;	GO:0008017//microtubule binding;GO:0008017//microtubule binding;GO:0008017//microtubule binding;GO:0042802//identical protein binding;GO:0043014//alpha-tubulin binding;GO:0048487//beta-tubulin binding;GO:0008017//microtubule binding;GO:0008017//microtubule binding;GO:0008017//microtubule binding;	-
MSTRG.100432	ENSBGRG00000026698	MSTRG.100432.1	62010	19[-]39920003-39924809	19[+]39986819-39987454	RNF222	-	-	ring finger protein 222 [Source:HGNC Symbol;Acc:HGNC:34517]	sp|Q8CEF8|RN222_MOUSE RING finger protein 222 OS=Mus musculus OX=10090 GN=Rnf222 PE=2 SV=2	veNOG12357;opiNOG40576	O	-	-	-	-
MSTRG.100434	ENSBGRG00000026699	MSTRG.100434.1	47217	19[-]39946095-39947196	19[+]39994413-40003153	-	GO:0003723;GO:0003735;GO:0005840;GO:0006412;GO:0006977;GO:0015934;GO:0022625;GO:0071479;GO:1902167;	K02898	ribosomal protein L26 [Source:HGNC Symbol;Acc:HGNC:10327]	sp|P61257|RL26_BOVIN 60S ribosomal protein L26 OS=Bos taurus OX=9913 GN=RPL26 PE=2 SV=1	veNOG14999	J	GO:0006412//translation;GO:0006977//DNA damage response, signal transduction by p53 class mediator resulting in cell cycle arrest;GO:0071479//cellular response to ionizing radiation;GO:1902167//positive regulation of intrinsic apoptotic signaling pathway in response to DNA damage by p53 class mediator;	GO:0005840//ribosome;GO:0015934//large ribosomal subunit;GO:0022625//cytosolic large ribosomal subunit;	GO:0003723//RNA binding;GO:0003735//structural constituent of ribosome;	ko05171(Coronavirus disease - COVID-19);ko03010(Ribosome)
MSTRG.100434	ENSBGRG00000026685	MSTRG.100434.1	46579	19[-]39946095-39947196	19[+]39771426-39899516	MYH10	GO:0000146;GO:0000281;GO:0001725;GO:0003774;GO:0005515;GO:0005524;GO:0005524;GO:0005737;GO:0005829;GO:0005844;GO:0005938;GO:0016459;GO:0016460;GO:0030048;GO:0030496;GO:0031032;GO:0032154;GO:0035613;GO:0042641;GO:0043531;GO:0048027;GO:0050714;GO:0051015;GO:0051015;GO:0097513;GO:0003774;GO:0005515;GO:0005524;GO:0016459;GO:0051015;GO:0003774;GO:0005515;GO:0005524;GO:0016459;GO:0051015;	K10352	myosin heavy chain 10 [Source:HGNC Symbol;Acc:HGNC:7568]	sp|Q27991|MYH10_BOVIN Myosin-10 OS=Bos taurus OX=9913 GN=MYH10 PE=2 SV=2	veNOG07733	Z	GO:0000281//mitotic cytokinesis;GO:0030048//actin filament-based movement;GO:0031032//actomyosin structure organization;GO:0050714//positive regulation of protein secretion;	GO:0001725//stress fiber;GO:0005737//cytoplasm;GO:0005829//cytosol;GO:0005844//polysome;GO:0005938//cell cortex;GO:0016459//myosin complex;GO:0016460//myosin II complex;GO:0030496//midbody;GO:0032154//cleavage furrow;GO:0042641//actomyosin;GO:0097513//myosin II filament;GO:0016459//myosin complex;GO:0016459//myosin complex;	GO:0000146//microfilament motor activity;GO:0003774//cytoskeletal motor activity;GO:0005515//protein binding;GO:0005524//ATP binding;GO:0005524//ATP binding;GO:0035613//RNA stem-loop binding;GO:0043531//ADP binding;GO:0048027//mRNA 5'-UTR binding;GO:0051015//actin filament binding;GO:0051015//actin filament binding;GO:0003774//cytoskeletal motor activity;GO:0005515//protein binding;GO:0005524//AT…	ko05130(Pathogenic Escherichia coli infection);ko04810(Regulation of actin cytoskeleton);ko04530(Tight junction);ko04270(Vascular smooth muscle contraction)
MSTRG.100434	ENSBGRG00000026702	MSTRG.100434.1	73168	19[-]39946095-39947196	19[-]40020364-40025692	-	-	K25637	-	sp|Q2M2E3|ODFP4_HUMAN Outer dense fiber protein 4 OS=Homo sapiens OX=9606 GN=ODF4 PE=1 SV=2	veNOG12743	S	-	-	-	-
MSTRG.100434	ENSBGRG00000026700	MSTRG.100434.1	54915	19[-]39946095-39947196	19[+]40002111-40007167	KRBA2	GO:0003676;GO:0015074;	-	KRAB-A domain containing 2 [Source:HGNC Symbol;Acc:HGNC:26989]	sp|Q6ZNG9|KRBA2_HUMAN KRAB-A domain-containing protein 2 OS=Homo sapiens OX=9606 GN=KRBA2 PE=1 SV=1	opiNOG21659;veNOG13496	R	GO:0015074//DNA integration;	-	GO:0003676//nucleic acid binding;	-
MSTRG.100434	ENSBGRG00000026704	MSTRG.100434.1	93649	19[-]39946095-39947196	19[-]40040845-40050976	ARHGEF15	GO:0005085;GO:0005085;GO:0030425;GO:0050790;GO:0061299;GO:2000297;	K20687	Rho guanine nucleotide exchange factor 15 [Source:HGNC Symbol;Acc:HGNC:15590]	sp|O94989|ARHGF_HUMAN Rho guanine nucleotide exchange factor 15 OS=Homo sapiens OX=9606 GN=ARHGEF15 PE=1 SV=4	veNOG03810	T	GO:0050790//regulation of catalytic activity;GO:0061299//retina vasculature morphogenesis in camera-type eye;GO:2000297//negative regulation of synapse maturation;	GO:0030425//dendrite;	GO:0005085//guanyl-nucleotide exchange factor activity;GO:0005085//guanyl-nucleotide exchange factor activity;	-
MSTRG.100434	ENSBGRG00000026691	MSTRG.100434.1	0	19[-]39946095-39947196	19[-]39909167-39966431	NDEL1	GO:0007100;GO:0007399;GO:0008017;GO:0060052;GO:0000226;GO:0000776;GO:0001764;GO:0001833;GO:0005813;GO:0005815;GO:0005875;GO:0007059;GO:0007100;GO:0007100;GO:0007399;GO:0008017;GO:0008017;GO:0008021;GO:0008090;GO:0008286;GO:0010975;GO:0016477;GO:0021799;GO:0021955;GO:0030424;GO:0031252;GO:0032418;GO:0033157;GO:0042802;GO:0043014;GO:0043203;GO:0043547;GO:0047496;GO:0048487;GO:0051642;GO:0060052;GO:…	K16739	nudE neurodevelopment protein 1 like 1 [Source:HGNC Symbol;Acc:HGNC:17620]	sp|O46480|NDEL1_RABIT Nuclear distribution protein nudE-like 1 OS=Oryctolagus cuniculus OX=9986 GN=NDEL1 PE=1 SV=3	veNOG02145	Z	GO:0007100//mitotic centrosome separation;GO:0007399//nervous system development;GO:0060052//neurofilament cytoskeleton organization;GO:0000226//microtubule cytoskeleton organization;GO:0001764//neuron migration;GO:0001833//inner cell mass cell proliferation;GO:0007059//chromosome segregation;GO:0007100//mitotic centrosome separation;GO:0007100//mitotic centrosome separation;GO:0007399//nervous s…	GO:0000776//kinetochore;GO:0005813//centrosome;GO:0005815//microtubule organizing center;GO:0005875//microtubule associated complex;GO:0008021//synaptic vesicle;GO:0030424//axon;GO:0031252//cell leading edge;GO:0043203//axon hillock;GO:0060053//neurofilament cytoskeleton;	GO:0008017//microtubule binding;GO:0008017//microtubule binding;GO:0008017//microtubule binding;GO:0042802//identical protein binding;GO:0043014//alpha-tubulin binding;GO:0048487//beta-tubulin binding;GO:0008017//microtubule binding;GO:0008017//microtubule binding;GO:0008017//microtubule binding;	-
MSTRG.100434	ENSBGRG00000026698	MSTRG.100434.1	39623	19[-]39946095-39947196	19[+]39986819-39987454	RNF222	-	-	ring finger protein 222 [Source:HGNC Symbol;Acc:HGNC:34517]	sp|Q8CEF8|RN222_MOUSE RING finger protein 222 OS=Mus musculus OX=10090 GN=Rnf222 PE=2 SV=2	veNOG12357;opiNOG40576	O	-	-	-	-
MSTRG.100435	ENSBGRG00000026699	MSTRG.100435.1	46866	19[+]39946160-39947547	19[+]39994413-40003153	-	GO:0003723;GO:0003735;GO:0005840;GO:0006412;GO:0006977;GO:0015934;GO:0022625;GO:0071479;GO:1902167;	K02898	ribosomal protein L26 [Source:HGNC Symbol;Acc:HGNC:10327]	sp|P61257|RL26_BOVIN 60S ribosomal protein L26 OS=Bos taurus OX=9913 GN=RPL26 PE=2 SV=1	veNOG14999	J	GO:0006412//translation;GO:0006977//DNA damage response, signal transduction by p53 class mediator resulting in cell cycle arrest;GO:0071479//cellular response to ionizing radiation;GO:1902167//positive regulation of intrinsic apoptotic signaling pathway in response to DNA damage by p53 class mediator;	GO:0005840//ribosome;GO:0015934//large ribosomal subunit;GO:0022625//cytosolic large ribosomal subunit;	GO:0003723//RNA binding;GO:0003735//structural constituent of ribosome;	ko05171(Coronavirus disease - COVID-19);ko03010(Ribosome)
MSTRG.100435	ENSBGRG00000026685	MSTRG.100435.1	46644	19[+]39946160-39947547	19[+]39771426-39899516	MYH10	GO:0000146;GO:0000281;GO:0001725;GO:0003774;GO:0005515;GO:0005524;GO:0005524;GO:0005737;GO:0005829;GO:0005844;GO:0005938;GO:0016459;GO:0016460;GO:0030048;GO:0030496;GO:0031032;GO:0032154;GO:0035613;GO:0042641;GO:0043531;GO:0048027;GO:0050714;GO:0051015;GO:0051015;GO:0097513;GO:0003774;GO:0005515;GO:0005524;GO:0016459;GO:0051015;GO:0003774;GO:0005515;GO:0005524;GO:0016459;GO:0051015;	K10352	myosin heavy chain 10 [Source:HGNC Symbol;Acc:HGNC:7568]	sp|Q27991|MYH10_BOVIN Myosin-10 OS=Bos taurus OX=9913 GN=MYH10 PE=2 SV=2	veNOG07733	Z	GO:0000281//mitotic cytokinesis;GO:0030048//actin filament-based movement;GO:0031032//actomyosin structure organization;GO:0050714//positive regulation of protein secretion;	GO:0001725//stress fiber;GO:0005737//cytoplasm;GO:0005829//cytosol;GO:0005844//polysome;GO:0005938//cell cortex;GO:0016459//myosin complex;GO:0016460//myosin II complex;GO:0030496//midbody;GO:0032154//cleavage furrow;GO:0042641//actomyosin;GO:0097513//myosin II filament;GO:0016459//myosin complex;GO:0016459//myosin complex;	GO:0000146//microfilament motor activity;GO:0003774//cytoskeletal motor activity;GO:0005515//protein binding;GO:0005524//ATP binding;GO:0005524//ATP binding;GO:0035613//RNA stem-loop binding;GO:0043531//ADP binding;GO:0048027//mRNA 5'-UTR binding;GO:0051015//actin filament binding;GO:0051015//actin filament binding;GO:0003774//cytoskeletal motor activity;GO:0005515//protein binding;GO:0005524//AT…	ko05130(Pathogenic Escherichia coli infection);ko04810(Regulation of actin cytoskeleton);ko04530(Tight junction);ko04270(Vascular smooth muscle contraction)
MSTRG.100435	ENSBGRG00000026702	MSTRG.100435.1	72817	19[+]39946160-39947547	19[-]40020364-40025692	-	-	K25637	-	sp|Q2M2E3|ODFP4_HUMAN Outer dense fiber protein 4 OS=Homo sapiens OX=9606 GN=ODF4 PE=1 SV=2	veNOG12743	S	-	-	-	-
MSTRG.100435	ENSBGRG00000026700	MSTRG.100435.1	54564	19[+]39946160-39947547	19[+]40002111-40007167	KRBA2	GO:0003676;GO:0015074;	-	KRAB-A domain containing 2 [Source:HGNC Symbol;Acc:HGNC:26989]	sp|Q6ZNG9|KRBA2_HUMAN KRAB-A domain-containing protein 2 OS=Homo sapiens OX=9606 GN=KRBA2 PE=1 SV=1	opiNOG21659;veNOG13496	R	GO:0015074//DNA integration;	-	GO:0003676//nucleic acid binding;	-
MSTRG.100435	ENSBGRG00000026704	MSTRG.100435.1	93298	19[+]39946160-39947547	19[-]40040845-40050976	ARHGEF15	GO:0005085;GO:0005085;GO:0030425;GO:0050790;GO:0061299;GO:2000297;	K20687	Rho guanine nucleotide exchange factor 15 [Source:HGNC Symbol;Acc:HGNC:15590]	sp|O94989|ARHGF_HUMAN Rho guanine nucleotide exchange factor 15 OS=Homo sapiens OX=9606 GN=ARHGEF15 PE=1 SV=4	veNOG03810	T	GO:0050790//regulation of catalytic activity;GO:0061299//retina vasculature morphogenesis in camera-type eye;GO:2000297//negative regulation of synapse maturation;	GO:0030425//dendrite;	GO:0005085//guanyl-nucleotide exchange factor activity;GO:0005085//guanyl-nucleotide exchange factor activity;	-
MSTRG.100435	ENSBGRG00000026691	MSTRG.100435.1	0	19[+]39946160-39947547	19[-]39909167-39966431	NDEL1	GO:0007100;GO:0007399;GO:0008017;GO:0060052;GO:0000226;GO:0000776;GO:0001764;GO:0001833;GO:0005813;GO:0005815;GO:0005875;GO:0007059;GO:0007100;GO:0007100;GO:0007399;GO:0008017;GO:0008017;GO:0008021;GO:0008090;GO:0008286;GO:0010975;GO:0016477;GO:0021799;GO:0021955;GO:0030424;GO:0031252;GO:0032418;GO:0033157;GO:0042802;GO:0043014;GO:0043203;GO:0043547;GO:0047496;GO:0048487;GO:0051642;GO:0060052;GO:…	K16739	nudE neurodevelopment protein 1 like 1 [Source:HGNC Symbol;Acc:HGNC:17620]	sp|O46480|NDEL1_RABIT Nuclear distribution protein nudE-like 1 OS=Oryctolagus cuniculus OX=9986 GN=NDEL1 PE=1 SV=3	veNOG02145	Z	GO:0007100//mitotic centrosome separation;GO:0007399//nervous system development;GO:0060052//neurofilament cytoskeleton organization;GO:0000226//microtubule cytoskeleton organization;GO:0001764//neuron migration;GO:0001833//inner cell mass cell proliferation;GO:0007059//chromosome segregation;GO:0007100//mitotic centrosome separation;GO:0007100//mitotic centrosome separation;GO:0007399//nervous s…	GO:0000776//kinetochore;GO:0005813//centrosome;GO:0005815//microtubule organizing center;GO:0005875//microtubule associated complex;GO:0008021//synaptic vesicle;GO:0030424//axon;GO:0031252//cell leading edge;GO:0043203//axon hillock;GO:0060053//neurofilament cytoskeleton;	GO:0008017//microtubule binding;GO:0008017//microtubule binding;GO:0008017//microtubule binding;GO:0042802//identical protein binding;GO:0043014//alpha-tubulin binding;GO:0048487//beta-tubulin binding;GO:0008017//microtubule binding;GO:0008017//microtubule binding;GO:0008017//microtubule binding;	-
MSTRG.100435	ENSBGRG00000026698	MSTRG.100435.1	39272	19[+]39946160-39947547	19[+]39986819-39987454	RNF222	-	-	ring finger protein 222 [Source:HGNC Symbol;Acc:HGNC:34517]	sp|Q8CEF8|RN222_MOUSE RING finger protein 222 OS=Mus musculus OX=10090 GN=Rnf222 PE=2 SV=2	veNOG12357;opiNOG40576	O	-	-	-	-
MSTRG.100436	ENSBGRG00000026699	MSTRG.100436.1	46575	19[+]39946608-39947838	19[+]39994413-40003153	-	GO:0003723;GO:0003735;GO:0005840;GO:0006412;GO:0006977;GO:0015934;GO:0022625;GO:0071479;GO:1902167;	K02898	ribosomal protein L26 [Source:HGNC Symbol;Acc:HGNC:10327]	sp|P61257|RL26_BOVIN 60S ribosomal protein L26 OS=Bos taurus OX=9913 GN=RPL26 PE=2 SV=1	veNOG14999	J	GO:0006412//translation;GO:0006977//DNA damage response, signal transduction by p53 class mediator resulting in cell cycle arrest;GO:0071479//cellular response to ionizing radiation;GO:1902167//positive regulation of intrinsic apoptotic signaling pathway in response to DNA damage by p53 class mediator;	GO:0005840//ribosome;GO:0015934//large ribosomal subunit;GO:0022625//cytosolic large ribosomal subunit;	GO:0003723//RNA binding;GO:0003735//structural constituent of ribosome;	ko05171(Coronavirus disease - COVID-19);ko03010(Ribosome)
MSTRG.100436	ENSBGRG00000026685	MSTRG.100436.1	47092	19[+]39946608-39947838	19[+]39771426-39899516	MYH10	GO:0000146;GO:0000281;GO:0001725;GO:0003774;GO:0005515;GO:0005524;GO:0005524;GO:0005737;GO:0005829;GO:0005844;GO:0005938;GO:0016459;GO:0016460;GO:0030048;GO:0030496;GO:0031032;GO:0032154;GO:0035613;GO:0042641;GO:0043531;GO:0048027;GO:0050714;GO:0051015;GO:0051015;GO:0097513;GO:0003774;GO:0005515;GO:0005524;GO:0016459;GO:0051015;GO:0003774;GO:0005515;GO:0005524;GO:0016459;GO:0051015;	K10352	myosin heavy chain 10 [Source:HGNC Symbol;Acc:HGNC:7568]	sp|Q27991|MYH10_BOVIN Myosin-10 OS=Bos taurus OX=9913 GN=MYH10 PE=2 SV=2	veNOG07733	Z	GO:0000281//mitotic cytokinesis;GO:0030048//actin filament-based movement;GO:0031032//actomyosin structure organization;GO:0050714//positive regulation of protein secretion;	GO:0001725//stress fiber;GO:0005737//cytoplasm;GO:0005829//cytosol;GO:0005844//polysome;GO:0005938//cell cortex;GO:0016459//myosin complex;GO:0016460//myosin II complex;GO:0030496//midbody;GO:0032154//cleavage furrow;GO:0042641//actomyosin;GO:0097513//myosin II filament;GO:0016459//myosin complex;GO:0016459//myosin complex;	GO:0000146//microfilament motor activity;GO:0003774//cytoskeletal motor activity;GO:0005515//protein binding;GO:0005524//ATP binding;GO:0005524//ATP binding;GO:0035613//RNA stem-loop binding;GO:0043531//ADP binding;GO:0048027//mRNA 5'-UTR binding;GO:0051015//actin filament binding;GO:0051015//actin filament binding;GO:0003774//cytoskeletal motor activity;GO:0005515//protein binding;GO:0005524//AT…	ko05130(Pathogenic Escherichia coli infection);ko04810(Regulation of actin cytoskeleton);ko04530(Tight junction);ko04270(Vascular smooth muscle contraction)
MSTRG.100436	ENSBGRG00000026702	MSTRG.100436.1	72526	19[+]39946608-39947838	19[-]40020364-40025692	-	-	K25637	-	sp|Q2M2E3|ODFP4_HUMAN Outer dense fiber protein 4 OS=Homo sapiens OX=9606 GN=ODF4 PE=1 SV=2	veNOG12743	S	-	-	-	-
MSTRG.100436	ENSBGRG00000026700	MSTRG.100436.1	54273	19[+]39946608-39947838	19[+]40002111-40007167	KRBA2	GO:0003676;GO:0015074;	-	KRAB-A domain containing 2 [Source:HGNC Symbol;Acc:HGNC:26989]	sp|Q6ZNG9|KRBA2_HUMAN KRAB-A domain-containing protein 2 OS=Homo sapiens OX=9606 GN=KRBA2 PE=1 SV=1	opiNOG21659;veNOG13496	R	GO:0015074//DNA integration;	-	GO:0003676//nucleic acid binding;	-
MSTRG.100436	ENSBGRG00000026704	MSTRG.100436.1	93007	19[+]39946608-39947838	19[-]40040845-40050976	ARHGEF15	GO:0005085;GO:0005085;GO:0030425;GO:0050790;GO:0061299;GO:2000297;	K20687	Rho guanine nucleotide exchange factor 15 [Source:HGNC Symbol;Acc:HGNC:15590]	sp|O94989|ARHGF_HUMAN Rho guanine nucleotide exchange factor 15 OS=Homo sapiens OX=9606 GN=ARHGEF15 PE=1 SV=4	veNOG03810	T	GO:0050790//regulation of catalytic activity;GO:0061299//retina vasculature morphogenesis in camera-type eye;GO:2000297//negative regulation of synapse maturation;	GO:0030425//dendrite;	GO:0005085//guanyl-nucleotide exchange factor activity;GO:0005085//guanyl-nucleotide exchange factor activity;	-
MSTRG.100436	ENSBGRG00000026691	MSTRG.100436.1	0	19[+]39946608-39947838	19[-]39909167-39966431	NDEL1	GO:0007100;GO:0007399;GO:0008017;GO:0060052;GO:0000226;GO:0000776;GO:0001764;GO:0001833;GO:0005813;GO:0005815;GO:0005875;GO:0007059;GO:0007100;GO:0007100;GO:0007399;GO:0008017;GO:0008017;GO:0008021;GO:0008090;GO:0008286;GO:0010975;GO:0016477;GO:0021799;GO:0021955;GO:0030424;GO:0031252;GO:0032418;GO:0033157;GO:0042802;GO:0043014;GO:0043203;GO:0043547;GO:0047496;GO:0048487;GO:0051642;GO:0060052;GO:…	K16739	nudE neurodevelopment protein 1 like 1 [Source:HGNC Symbol;Acc:HGNC:17620]	sp|O46480|NDEL1_RABIT Nuclear distribution protein nudE-like 1 OS=Oryctolagus cuniculus OX=9986 GN=NDEL1 PE=1 SV=3	veNOG02145	Z	GO:0007100//mitotic centrosome separation;GO:0007399//nervous system development;GO:0060052//neurofilament cytoskeleton organization;GO:0000226//microtubule cytoskeleton organization;GO:0001764//neuron migration;GO:0001833//inner cell mass cell proliferation;GO:0007059//chromosome segregation;GO:0007100//mitotic centrosome separation;GO:0007100//mitotic centrosome separation;GO:0007399//nervous s…	GO:0000776//kinetochore;GO:0005813//centrosome;GO:0005815//microtubule organizing center;GO:0005875//microtubule associated complex;GO:0008021//synaptic vesicle;GO:0030424//axon;GO:0031252//cell leading edge;GO:0043203//axon hillock;GO:0060053//neurofilament cytoskeleton;	GO:0008017//microtubule binding;GO:0008017//microtubule binding;GO:0008017//microtubule binding;GO:0042802//identical protein binding;GO:0043014//alpha-tubulin binding;GO:0048487//beta-tubulin binding;GO:0008017//microtubule binding;GO:0008017//microtubule binding;GO:0008017//microtubule binding;	-
MSTRG.100436	ENSBGRG00000026698	MSTRG.100436.1	38981	19[+]39946608-39947838	19[+]39986819-39987454	RNF222	-	-	ring finger protein 222 [Source:HGNC Symbol;Acc:HGNC:34517]	sp|Q8CEF8|RN222_MOUSE RING finger protein 222 OS=Mus musculus OX=10090 GN=Rnf222 PE=2 SV=2	veNOG12357;opiNOG40576	O	-	-	-	-
MSTRG.100437	ENSBGRG00000026699	MSTRG.100437.1,MSTRG.100437.2	46453	19[-]39946687-39947960	19[+]39994413-40003153	-	GO:0003723;GO:0003735;GO:0005840;GO:0006412;GO:0006977;GO:0015934;GO:0022625;GO:0071479;GO:1902167;	K02898	ribosomal protein L26 [Source:HGNC Symbol;Acc:HGNC:10327]	sp|P61257|RL26_BOVIN 60S ribosomal protein L26 OS=Bos taurus OX=9913 GN=RPL26 PE=2 SV=1	veNOG14999	J	GO:0006412//translation;GO:0006977//DNA damage response, signal transduction by p53 class mediator resulting in cell cycle arrest;GO:0071479//cellular response to ionizing radiation;GO:1902167//positive regulation of intrinsic apoptotic signaling pathway in response to DNA damage by p53 class mediator;	GO:0005840//ribosome;GO:0015934//large ribosomal subunit;GO:0022625//cytosolic large ribosomal subunit;	GO:0003723//RNA binding;GO:0003735//structural constituent of ribosome;	ko05171(Coronavirus disease - COVID-19);ko03010(Ribosome)
MSTRG.100437	ENSBGRG00000026685	MSTRG.100437.1,MSTRG.100437.2	47171	19[-]39946687-39947960	19[+]39771426-39899516	MYH10	GO:0000146;GO:0000281;GO:0001725;GO:0003774;GO:0005515;GO:0005524;GO:0005524;GO:0005737;GO:0005829;GO:0005844;GO:0005938;GO:0016459;GO:0016460;GO:0030048;GO:0030496;GO:0031032;GO:0032154;GO:0035613;GO:0042641;GO:0043531;GO:0048027;GO:0050714;GO:0051015;GO:0051015;GO:0097513;GO:0003774;GO:0005515;GO:0005524;GO:0016459;GO:0051015;GO:0003774;GO:0005515;GO:0005524;GO:0016459;GO:0051015;	K10352	myosin heavy chain 10 [Source:HGNC Symbol;Acc:HGNC:7568]	sp|Q27991|MYH10_BOVIN Myosin-10 OS=Bos taurus OX=9913 GN=MYH10 PE=2 SV=2	veNOG07733	Z	GO:0000281//mitotic cytokinesis;GO:0030048//actin filament-based movement;GO:0031032//actomyosin structure organization;GO:0050714//positive regulation of protein secretion;	GO:0001725//stress fiber;GO:0005737//cytoplasm;GO:0005829//cytosol;GO:0005844//polysome;GO:0005938//cell cortex;GO:0016459//myosin complex;GO:0016460//myosin II complex;GO:0030496//midbody;GO:0032154//cleavage furrow;GO:0042641//actomyosin;GO:0097513//myosin II filament;GO:0016459//myosin complex;GO:0016459//myosin complex;	GO:0000146//microfilament motor activity;GO:0003774//cytoskeletal motor activity;GO:0005515//protein binding;GO:0005524//ATP binding;GO:0005524//ATP binding;GO:0035613//RNA stem-loop binding;GO:0043531//ADP binding;GO:0048027//mRNA 5'-UTR binding;GO:0051015//actin filament binding;GO:0051015//actin filament binding;GO:0003774//cytoskeletal motor activity;GO:0005515//protein binding;GO:0005524//AT…	ko05130(Pathogenic Escherichia coli infection);ko04810(Regulation of actin cytoskeleton);ko04530(Tight junction);ko04270(Vascular smooth muscle contraction)
MSTRG.100437	ENSBGRG00000026702	MSTRG.100437.1,MSTRG.100437.2	72404	19[-]39946687-39947960	19[-]40020364-40025692	-	-	K25637	-	sp|Q2M2E3|ODFP4_HUMAN Outer dense fiber protein 4 OS=Homo sapiens OX=9606 GN=ODF4 PE=1 SV=2	veNOG12743	S	-	-	-	-
MSTRG.100437	ENSBGRG00000026700	MSTRG.100437.1,MSTRG.100437.2	54151	19[-]39946687-39947960	19[+]40002111-40007167	KRBA2	GO:0003676;GO:0015074;	-	KRAB-A domain containing 2 [Source:HGNC Symbol;Acc:HGNC:26989]	sp|Q6ZNG9|KRBA2_HUMAN KRAB-A domain-containing protein 2 OS=Homo sapiens OX=9606 GN=KRBA2 PE=1 SV=1	opiNOG21659;veNOG13496	R	GO:0015074//DNA integration;	-	GO:0003676//nucleic acid binding;	-
MSTRG.100437	ENSBGRG00000026704	MSTRG.100437.1,MSTRG.100437.2	92885	19[-]39946687-39947960	19[-]40040845-40050976	ARHGEF15	GO:0005085;GO:0005085;GO:0030425;GO:0050790;GO:0061299;GO:2000297;	K20687	Rho guanine nucleotide exchange factor 15 [Source:HGNC Symbol;Acc:HGNC:15590]	sp|O94989|ARHGF_HUMAN Rho guanine nucleotide exchange factor 15 OS=Homo sapiens OX=9606 GN=ARHGEF15 PE=1 SV=4	veNOG03810	T	GO:0050790//regulation of catalytic activity;GO:0061299//retina vasculature morphogenesis in camera-type eye;GO:2000297//negative regulation of synapse maturation;	GO:0030425//dendrite;	GO:0005085//guanyl-nucleotide exchange factor activity;GO:0005085//guanyl-nucleotide exchange factor activity;	-
MSTRG.100437	ENSBGRG00000026691	MSTRG.100437.1,MSTRG.100437.2	0	19[-]39946687-39947960	19[-]39909167-39966431	NDEL1	GO:0007100;GO:0007399;GO:0008017;GO:0060052;GO:0000226;GO:0000776;GO:0001764;GO:0001833;GO:0005813;GO:0005815;GO:0005875;GO:0007059;GO:0007100;GO:0007100;GO:0007399;GO:0008017;GO:0008017;GO:0008021;GO:0008090;GO:0008286;GO:0010975;GO:0016477;GO:0021799;GO:0021955;GO:0030424;GO:0031252;GO:0032418;GO:0033157;GO:0042802;GO:0043014;GO:0043203;GO:0043547;GO:0047496;GO:0048487;GO:0051642;GO:0060052;GO:…	K16739	nudE neurodevelopment protein 1 like 1 [Source:HGNC Symbol;Acc:HGNC:17620]	sp|O46480|NDEL1_RABIT Nuclear distribution protein nudE-like 1 OS=Oryctolagus cuniculus OX=9986 GN=NDEL1 PE=1 SV=3	veNOG02145	Z	GO:0007100//mitotic centrosome separation;GO:0007399//nervous system development;GO:0060052//neurofilament cytoskeleton organization;GO:0000226//microtubule cytoskeleton organization;GO:0001764//neuron migration;GO:0001833//inner cell mass cell proliferation;GO:0007059//chromosome segregation;GO:0007100//mitotic centrosome separation;GO:0007100//mitotic centrosome separation;GO:0007399//nervous s…	GO:0000776//kinetochore;GO:0005813//centrosome;GO:0005815//microtubule organizing center;GO:0005875//microtubule associated complex;GO:0008021//synaptic vesicle;GO:0030424//axon;GO:0031252//cell leading edge;GO:0043203//axon hillock;GO:0060053//neurofilament cytoskeleton;	GO:0008017//microtubule binding;GO:0008017//microtubule binding;GO:0008017//microtubule binding;GO:0042802//identical protein binding;GO:0043014//alpha-tubulin binding;GO:0048487//beta-tubulin binding;GO:0008017//microtubule binding;GO:0008017//microtubule binding;GO:0008017//microtubule binding;	-
MSTRG.100437	ENSBGRG00000026698	MSTRG.100437.1,MSTRG.100437.2	38859	19[-]39946687-39947960	19[+]39986819-39987454	RNF222	-	-	ring finger protein 222 [Source:HGNC Symbol;Acc:HGNC:34517]	sp|Q8CEF8|RN222_MOUSE RING finger protein 222 OS=Mus musculus OX=10090 GN=Rnf222 PE=2 SV=2	veNOG12357;opiNOG40576	O	-	-	-	-
MSTRG.100440	ENSBGRG00000026699	MSTRG.100440.1	42074	19[+]39951169-39952339	19[+]39994413-40003153	-	GO:0003723;GO:0003735;GO:0005840;GO:0006412;GO:0006977;GO:0015934;GO:0022625;GO:0071479;GO:1902167;	K02898	ribosomal protein L26 [Source:HGNC Symbol;Acc:HGNC:10327]	sp|P61257|RL26_BOVIN 60S ribosomal protein L26 OS=Bos taurus OX=9913 GN=RPL26 PE=2 SV=1	veNOG14999	J	GO:0006412//translation;GO:0006977//DNA damage response, signal transduction by p53 class mediator resulting in cell cycle arrest;GO:0071479//cellular response to ionizing radiation;GO:1902167//positive regulation of intrinsic apoptotic signaling pathway in response to DNA damage by p53 class mediator;	GO:0005840//ribosome;GO:0015934//large ribosomal subunit;GO:0022625//cytosolic large ribosomal subunit;	GO:0003723//RNA binding;GO:0003735//structural constituent of ribosome;	ko05171(Coronavirus disease - COVID-19);ko03010(Ribosome)
MSTRG.100440	ENSBGRG00000026685	MSTRG.100440.1	51653	19[+]39951169-39952339	19[+]39771426-39899516	MYH10	GO:0000146;GO:0000281;GO:0001725;GO:0003774;GO:0005515;GO:0005524;GO:0005524;GO:0005737;GO:0005829;GO:0005844;GO:0005938;GO:0016459;GO:0016460;GO:0030048;GO:0030496;GO:0031032;GO:0032154;GO:0035613;GO:0042641;GO:0043531;GO:0048027;GO:0050714;GO:0051015;GO:0051015;GO:0097513;GO:0003774;GO:0005515;GO:0005524;GO:0016459;GO:0051015;GO:0003774;GO:0005515;GO:0005524;GO:0016459;GO:0051015;	K10352	myosin heavy chain 10 [Source:HGNC Symbol;Acc:HGNC:7568]	sp|Q27991|MYH10_BOVIN Myosin-10 OS=Bos taurus OX=9913 GN=MYH10 PE=2 SV=2	veNOG07733	Z	GO:0000281//mitotic cytokinesis;GO:0030048//actin filament-based movement;GO:0031032//actomyosin structure organization;GO:0050714//positive regulation of protein secretion;	GO:0001725//stress fiber;GO:0005737//cytoplasm;GO:0005829//cytosol;GO:0005844//polysome;GO:0005938//cell cortex;GO:0016459//myosin complex;GO:0016460//myosin II complex;GO:0030496//midbody;GO:0032154//cleavage furrow;GO:0042641//actomyosin;GO:0097513//myosin II filament;GO:0016459//myosin complex;GO:0016459//myosin complex;	GO:0000146//microfilament motor activity;GO:0003774//cytoskeletal motor activity;GO:0005515//protein binding;GO:0005524//ATP binding;GO:0005524//ATP binding;GO:0035613//RNA stem-loop binding;GO:0043531//ADP binding;GO:0048027//mRNA 5'-UTR binding;GO:0051015//actin filament binding;GO:0051015//actin filament binding;GO:0003774//cytoskeletal motor activity;GO:0005515//protein binding;GO:0005524//AT…	ko05130(Pathogenic Escherichia coli infection);ko04810(Regulation of actin cytoskeleton);ko04530(Tight junction);ko04270(Vascular smooth muscle contraction)
MSTRG.100440	ENSBGRG00000026702	MSTRG.100440.1	68025	19[+]39951169-39952339	19[-]40020364-40025692	-	-	K25637	-	sp|Q2M2E3|ODFP4_HUMAN Outer dense fiber protein 4 OS=Homo sapiens OX=9606 GN=ODF4 PE=1 SV=2	veNOG12743	S	-	-	-	-
MSTRG.100440	ENSBGRG00000026700	MSTRG.100440.1	49772	19[+]39951169-39952339	19[+]40002111-40007167	KRBA2	GO:0003676;GO:0015074;	-	KRAB-A domain containing 2 [Source:HGNC Symbol;Acc:HGNC:26989]	sp|Q6ZNG9|KRBA2_HUMAN KRAB-A domain-containing protein 2 OS=Homo sapiens OX=9606 GN=KRBA2 PE=1 SV=1	opiNOG21659;veNOG13496	R	GO:0015074//DNA integration;	-	GO:0003676//nucleic acid binding;	-
MSTRG.100440	ENSBGRG00000026704	MSTRG.100440.1	88506	19[+]39951169-39952339	19[-]40040845-40050976	ARHGEF15	GO:0005085;GO:0005085;GO:0030425;GO:0050790;GO:0061299;GO:2000297;	K20687	Rho guanine nucleotide exchange factor 15 [Source:HGNC Symbol;Acc:HGNC:15590]	sp|O94989|ARHGF_HUMAN Rho guanine nucleotide exchange factor 15 OS=Homo sapiens OX=9606 GN=ARHGEF15 PE=1 SV=4	veNOG03810	T	GO:0050790//regulation of catalytic activity;GO:0061299//retina vasculature morphogenesis in camera-type eye;GO:2000297//negative regulation of synapse maturation;	GO:0030425//dendrite;	GO:0005085//guanyl-nucleotide exchange factor activity;GO:0005085//guanyl-nucleotide exchange factor activity;	-
MSTRG.100440	ENSBGRG00000026691	MSTRG.100440.1	0	19[+]39951169-39952339	19[-]39909167-39966431	NDEL1	GO:0007100;GO:0007399;GO:0008017;GO:0060052;GO:0000226;GO:0000776;GO:0001764;GO:0001833;GO:0005813;GO:0005815;GO:0005875;GO:0007059;GO:0007100;GO:0007100;GO:0007399;GO:0008017;GO:0008017;GO:0008021;GO:0008090;GO:0008286;GO:0010975;GO:0016477;GO:0021799;GO:0021955;GO:0030424;GO:0031252;GO:0032418;GO:0033157;GO:0042802;GO:0043014;GO:0043203;GO:0043547;GO:0047496;GO:0048487;GO:0051642;GO:0060052;GO:…	K16739	nudE neurodevelopment protein 1 like 1 [Source:HGNC Symbol;Acc:HGNC:17620]	sp|O46480|NDEL1_RABIT Nuclear distribution protein nudE-like 1 OS=Oryctolagus cuniculus OX=9986 GN=NDEL1 PE=1 SV=3	veNOG02145	Z	GO:0007100//mitotic centrosome separation;GO:0007399//nervous system development;GO:0060052//neurofilament cytoskeleton organization;GO:0000226//microtubule cytoskeleton organization;GO:0001764//neuron migration;GO:0001833//inner cell mass cell proliferation;GO:0007059//chromosome segregation;GO:0007100//mitotic centrosome separation;GO:0007100//mitotic centrosome separation;GO:0007399//nervous s…	GO:0000776//kinetochore;GO:0005813//centrosome;GO:0005815//microtubule organizing center;GO:0005875//microtubule associated complex;GO:0008021//synaptic vesicle;GO:0030424//axon;GO:0031252//cell leading edge;GO:0043203//axon hillock;GO:0060053//neurofilament cytoskeleton;	GO:0008017//microtubule binding;GO:0008017//microtubule binding;GO:0008017//microtubule binding;GO:0042802//identical protein binding;GO:0043014//alpha-tubulin binding;GO:0048487//beta-tubulin binding;GO:0008017//microtubule binding;GO:0008017//microtubule binding;GO:0008017//microtubule binding;	-
MSTRG.100440	ENSBGRG00000026698	MSTRG.100440.1	34480	19[+]39951169-39952339	19[+]39986819-39987454	RNF222	-	-	ring finger protein 222 [Source:HGNC Symbol;Acc:HGNC:34517]	sp|Q8CEF8|RN222_MOUSE RING finger protein 222 OS=Mus musculus OX=10090 GN=Rnf222 PE=2 SV=2	veNOG12357;opiNOG40576	O	-	-	-	-
MSTRG.100442	ENSBGRG00000026699	MSTRG.100442.1	39280	19[+]39953168-39955133	19[+]39994413-40003153	-	GO:0003723;GO:0003735;GO:0005840;GO:0006412;GO:0006977;GO:0015934;GO:0022625;GO:0071479;GO:1902167;	K02898	ribosomal protein L26 [Source:HGNC Symbol;Acc:HGNC:10327]	sp|P61257|RL26_BOVIN 60S ribosomal protein L26 OS=Bos taurus OX=9913 GN=RPL26 PE=2 SV=1	veNOG14999	J	GO:0006412//translation;GO:0006977//DNA damage response, signal transduction by p53 class mediator resulting in cell cycle arrest;GO:0071479//cellular response to ionizing radiation;GO:1902167//positive regulation of intrinsic apoptotic signaling pathway in response to DNA damage by p53 class mediator;	GO:0005840//ribosome;GO:0015934//large ribosomal subunit;GO:0022625//cytosolic large ribosomal subunit;	GO:0003723//RNA binding;GO:0003735//structural constituent of ribosome;	ko05171(Coronavirus disease - COVID-19);ko03010(Ribosome)
MSTRG.100442	ENSBGRG00000026685	MSTRG.100442.1	53652	19[+]39953168-39955133	19[+]39771426-39899516	MYH10	GO:0000146;GO:0000281;GO:0001725;GO:0003774;GO:0005515;GO:0005524;GO:0005524;GO:0005737;GO:0005829;GO:0005844;GO:0005938;GO:0016459;GO:0016460;GO:0030048;GO:0030496;GO:0031032;GO:0032154;GO:0035613;GO:0042641;GO:0043531;GO:0048027;GO:0050714;GO:0051015;GO:0051015;GO:0097513;GO:0003774;GO:0005515;GO:0005524;GO:0016459;GO:0051015;GO:0003774;GO:0005515;GO:0005524;GO:0016459;GO:0051015;	K10352	myosin heavy chain 10 [Source:HGNC Symbol;Acc:HGNC:7568]	sp|Q27991|MYH10_BOVIN Myosin-10 OS=Bos taurus OX=9913 GN=MYH10 PE=2 SV=2	veNOG07733	Z	GO:0000281//mitotic cytokinesis;GO:0030048//actin filament-based movement;GO:0031032//actomyosin structure organization;GO:0050714//positive regulation of protein secretion;	GO:0001725//stress fiber;GO:0005737//cytoplasm;GO:0005829//cytosol;GO:0005844//polysome;GO:0005938//cell cortex;GO:0016459//myosin complex;GO:0016460//myosin II complex;GO:0030496//midbody;GO:0032154//cleavage furrow;GO:0042641//actomyosin;GO:0097513//myosin II filament;GO:0016459//myosin complex;GO:0016459//myosin complex;	GO:0000146//microfilament motor activity;GO:0003774//cytoskeletal motor activity;GO:0005515//protein binding;GO:0005524//ATP binding;GO:0005524//ATP binding;GO:0035613//RNA stem-loop binding;GO:0043531//ADP binding;GO:0048027//mRNA 5'-UTR binding;GO:0051015//actin filament binding;GO:0051015//actin filament binding;GO:0003774//cytoskeletal motor activity;GO:0005515//protein binding;GO:0005524//AT…	ko05130(Pathogenic Escherichia coli infection);ko04810(Regulation of actin cytoskeleton);ko04530(Tight junction);ko04270(Vascular smooth muscle contraction)
MSTRG.100442	ENSBGRG00000026702	MSTRG.100442.1	65231	19[+]39953168-39955133	19[-]40020364-40025692	-	-	K25637	-	sp|Q2M2E3|ODFP4_HUMAN Outer dense fiber protein 4 OS=Homo sapiens OX=9606 GN=ODF4 PE=1 SV=2	veNOG12743	S	-	-	-	-
MSTRG.100442	ENSBGRG00000026700	MSTRG.100442.1	46978	19[+]39953168-39955133	19[+]40002111-40007167	KRBA2	GO:0003676;GO:0015074;	-	KRAB-A domain containing 2 [Source:HGNC Symbol;Acc:HGNC:26989]	sp|Q6ZNG9|KRBA2_HUMAN KRAB-A domain-containing protein 2 OS=Homo sapiens OX=9606 GN=KRBA2 PE=1 SV=1	opiNOG21659;veNOG13496	R	GO:0015074//DNA integration;	-	GO:0003676//nucleic acid binding;	-
MSTRG.100442	ENSBGRG00000026704	MSTRG.100442.1	85712	19[+]39953168-39955133	19[-]40040845-40050976	ARHGEF15	GO:0005085;GO:0005085;GO:0030425;GO:0050790;GO:0061299;GO:2000297;	K20687	Rho guanine nucleotide exchange factor 15 [Source:HGNC Symbol;Acc:HGNC:15590]	sp|O94989|ARHGF_HUMAN Rho guanine nucleotide exchange factor 15 OS=Homo sapiens OX=9606 GN=ARHGEF15 PE=1 SV=4	veNOG03810	T	GO:0050790//regulation of catalytic activity;GO:0061299//retina vasculature morphogenesis in camera-type eye;GO:2000297//negative regulation of synapse maturation;	GO:0030425//dendrite;	GO:0005085//guanyl-nucleotide exchange factor activity;GO:0005085//guanyl-nucleotide exchange factor activity;	-
MSTRG.100442	ENSBGRG00000026691	MSTRG.100442.1	0	19[+]39953168-39955133	19[-]39909167-39966431	NDEL1	GO:0007100;GO:0007399;GO:0008017;GO:0060052;GO:0000226;GO:0000776;GO:0001764;GO:0001833;GO:0005813;GO:0005815;GO:0005875;GO:0007059;GO:0007100;GO:0007100;GO:0007399;GO:0008017;GO:0008017;GO:0008021;GO:0008090;GO:0008286;GO:0010975;GO:0016477;GO:0021799;GO:0021955;GO:0030424;GO:0031252;GO:0032418;GO:0033157;GO:0042802;GO:0043014;GO:0043203;GO:0043547;GO:0047496;GO:0048487;GO:0051642;GO:0060052;GO:…	K16739	nudE neurodevelopment protein 1 like 1 [Source:HGNC Symbol;Acc:HGNC:17620]	sp|O46480|NDEL1_RABIT Nuclear distribution protein nudE-like 1 OS=Oryctolagus cuniculus OX=9986 GN=NDEL1 PE=1 SV=3	veNOG02145	Z	GO:0007100//mitotic centrosome separation;GO:0007399//nervous system development;GO:0060052//neurofilament cytoskeleton organization;GO:0000226//microtubule cytoskeleton organization;GO:0001764//neuron migration;GO:0001833//inner cell mass cell proliferation;GO:0007059//chromosome segregation;GO:0007100//mitotic centrosome separation;GO:0007100//mitotic centrosome separation;GO:0007399//nervous s…	GO:0000776//kinetochore;GO:0005813//centrosome;GO:0005815//microtubule organizing center;GO:0005875//microtubule associated complex;GO:0008021//synaptic vesicle;GO:0030424//axon;GO:0031252//cell leading edge;GO:0043203//axon hillock;GO:0060053//neurofilament cytoskeleton;	GO:0008017//microtubule binding;GO:0008017//microtubule binding;GO:0008017//microtubule binding;GO:0042802//identical protein binding;GO:0043014//alpha-tubulin binding;GO:0048487//beta-tubulin binding;GO:0008017//microtubule binding;GO:0008017//microtubule binding;GO:0008017//microtubule binding;	-
MSTRG.100442	ENSBGRG00000026698	MSTRG.100442.1	31686	19[+]39953168-39955133	19[+]39986819-39987454	RNF222	-	-	ring finger protein 222 [Source:HGNC Symbol;Acc:HGNC:34517]	sp|Q8CEF8|RN222_MOUSE RING finger protein 222 OS=Mus musculus OX=10090 GN=Rnf222 PE=2 SV=2	veNOG12357;opiNOG40576	O	-	-	-	-
MSTRG.100443	ENSBGRG00000026699	MSTRG.100443.1	38964	19[+]39953548-39955449	19[+]39994413-40003153	-	GO:0003723;GO:0003735;GO:0005840;GO:0006412;GO:0006977;GO:0015934;GO:0022625;GO:0071479;GO:1902167;	K02898	ribosomal protein L26 [Source:HGNC Symbol;Acc:HGNC:10327]	sp|P61257|RL26_BOVIN 60S ribosomal protein L26 OS=Bos taurus OX=9913 GN=RPL26 PE=2 SV=1	veNOG14999	J	GO:0006412//translation;GO:0006977//DNA damage response, signal transduction by p53 class mediator resulting in cell cycle arrest;GO:0071479//cellular response to ionizing radiation;GO:1902167//positive regulation of intrinsic apoptotic signaling pathway in response to DNA damage by p53 class mediator;	GO:0005840//ribosome;GO:0015934//large ribosomal subunit;GO:0022625//cytosolic large ribosomal subunit;	GO:0003723//RNA binding;GO:0003735//structural constituent of ribosome;	ko05171(Coronavirus disease - COVID-19);ko03010(Ribosome)
MSTRG.100443	ENSBGRG00000026685	MSTRG.100443.1	54032	19[+]39953548-39955449	19[+]39771426-39899516	MYH10	GO:0000146;GO:0000281;GO:0001725;GO:0003774;GO:0005515;GO:0005524;GO:0005524;GO:0005737;GO:0005829;GO:0005844;GO:0005938;GO:0016459;GO:0016460;GO:0030048;GO:0030496;GO:0031032;GO:0032154;GO:0035613;GO:0042641;GO:0043531;GO:0048027;GO:0050714;GO:0051015;GO:0051015;GO:0097513;GO:0003774;GO:0005515;GO:0005524;GO:0016459;GO:0051015;GO:0003774;GO:0005515;GO:0005524;GO:0016459;GO:0051015;	K10352	myosin heavy chain 10 [Source:HGNC Symbol;Acc:HGNC:7568]	sp|Q27991|MYH10_BOVIN Myosin-10 OS=Bos taurus OX=9913 GN=MYH10 PE=2 SV=2	veNOG07733	Z	GO:0000281//mitotic cytokinesis;GO:0030048//actin filament-based movement;GO:0031032//actomyosin structure organization;GO:0050714//positive regulation of protein secretion;	GO:0001725//stress fiber;GO:0005737//cytoplasm;GO:0005829//cytosol;GO:0005844//polysome;GO:0005938//cell cortex;GO:0016459//myosin complex;GO:0016460//myosin II complex;GO:0030496//midbody;GO:0032154//cleavage furrow;GO:0042641//actomyosin;GO:0097513//myosin II filament;GO:0016459//myosin complex;GO:0016459//myosin complex;	GO:0000146//microfilament motor activity;GO:0003774//cytoskeletal motor activity;GO:0005515//protein binding;GO:0005524//ATP binding;GO:0005524//ATP binding;GO:0035613//RNA stem-loop binding;GO:0043531//ADP binding;GO:0048027//mRNA 5'-UTR binding;GO:0051015//actin filament binding;GO:0051015//actin filament binding;GO:0003774//cytoskeletal motor activity;GO:0005515//protein binding;GO:0005524//AT…	ko05130(Pathogenic Escherichia coli infection);ko04810(Regulation of actin cytoskeleton);ko04530(Tight junction);ko04270(Vascular smooth muscle contraction)
MSTRG.100443	ENSBGRG00000026702	MSTRG.100443.1	64915	19[+]39953548-39955449	19[-]40020364-40025692	-	-	K25637	-	sp|Q2M2E3|ODFP4_HUMAN Outer dense fiber protein 4 OS=Homo sapiens OX=9606 GN=ODF4 PE=1 SV=2	veNOG12743	S	-	-	-	-
MSTRG.100443	ENSBGRG00000026700	MSTRG.100443.1	46662	19[+]39953548-39955449	19[+]40002111-40007167	KRBA2	GO:0003676;GO:0015074;	-	KRAB-A domain containing 2 [Source:HGNC Symbol;Acc:HGNC:26989]	sp|Q6ZNG9|KRBA2_HUMAN KRAB-A domain-containing protein 2 OS=Homo sapiens OX=9606 GN=KRBA2 PE=1 SV=1	opiNOG21659;veNOG13496	R	GO:0015074//DNA integration;	-	GO:0003676//nucleic acid binding;	-
MSTRG.100443	ENSBGRG00000026704	MSTRG.100443.1	85396	19[+]39953548-39955449	19[-]40040845-40050976	ARHGEF15	GO:0005085;GO:0005085;GO:0030425;GO:0050790;GO:0061299;GO:2000297;	K20687	Rho guanine nucleotide exchange factor 15 [Source:HGNC Symbol;Acc:HGNC:15590]	sp|O94989|ARHGF_HUMAN Rho guanine nucleotide exchange factor 15 OS=Homo sapiens OX=9606 GN=ARHGEF15 PE=1 SV=4	veNOG03810	T	GO:0050790//regulation of catalytic activity;GO:0061299//retina vasculature morphogenesis in camera-type eye;GO:2000297//negative regulation of synapse maturation;	GO:0030425//dendrite;	GO:0005085//guanyl-nucleotide exchange factor activity;GO:0005085//guanyl-nucleotide exchange factor activity;	-
MSTRG.100443	ENSBGRG00000026691	MSTRG.100443.1	0	19[+]39953548-39955449	19[-]39909167-39966431	NDEL1	GO:0007100;GO:0007399;GO:0008017;GO:0060052;GO:0000226;GO:0000776;GO:0001764;GO:0001833;GO:0005813;GO:0005815;GO:0005875;GO:0007059;GO:0007100;GO:0007100;GO:0007399;GO:0008017;GO:0008017;GO:0008021;GO:0008090;GO:0008286;GO:0010975;GO:0016477;GO:0021799;GO:0021955;GO:0030424;GO:0031252;GO:0032418;GO:0033157;GO:0042802;GO:0043014;GO:0043203;GO:0043547;GO:0047496;GO:0048487;GO:0051642;GO:0060052;GO:…	K16739	nudE neurodevelopment protein 1 like 1 [Source:HGNC Symbol;Acc:HGNC:17620]	sp|O46480|NDEL1_RABIT Nuclear distribution protein nudE-like 1 OS=Oryctolagus cuniculus OX=9986 GN=NDEL1 PE=1 SV=3	veNOG02145	Z	GO:0007100//mitotic centrosome separation;GO:0007399//nervous system development;GO:0060052//neurofilament cytoskeleton organization;GO:0000226//microtubule cytoskeleton organization;GO:0001764//neuron migration;GO:0001833//inner cell mass cell proliferation;GO:0007059//chromosome segregation;GO:0007100//mitotic centrosome separation;GO:0007100//mitotic centrosome separation;GO:0007399//nervous s…	GO:0000776//kinetochore;GO:0005813//centrosome;GO:0005815//microtubule organizing center;GO:0005875//microtubule associated complex;GO:0008021//synaptic vesicle;GO:0030424//axon;GO:0031252//cell leading edge;GO:0043203//axon hillock;GO:0060053//neurofilament cytoskeleton;	GO:0008017//microtubule binding;GO:0008017//microtubule binding;GO:0008017//microtubule binding;GO:0042802//identical protein binding;GO:0043014//alpha-tubulin binding;GO:0048487//beta-tubulin binding;GO:0008017//microtubule binding;GO:0008017//microtubule binding;GO:0008017//microtubule binding;	-
MSTRG.100443	ENSBGRG00000026698	MSTRG.100443.1	31370	19[+]39953548-39955449	19[+]39986819-39987454	RNF222	-	-	ring finger protein 222 [Source:HGNC Symbol;Acc:HGNC:34517]	sp|Q8CEF8|RN222_MOUSE RING finger protein 222 OS=Mus musculus OX=10090 GN=Rnf222 PE=2 SV=2	veNOG12357;opiNOG40576	O	-	-	-	-
MSTRG.100451	ENSBGRG00000026699	MSTRG.100451.1	24732	19[-]39968366-39969681	19[+]39994413-40003153	-	GO:0003723;GO:0003735;GO:0005840;GO:0006412;GO:0006977;GO:0015934;GO:0022625;GO:0071479;GO:1902167;	K02898	ribosomal protein L26 [Source:HGNC Symbol;Acc:HGNC:10327]	sp|P61257|RL26_BOVIN 60S ribosomal protein L26 OS=Bos taurus OX=9913 GN=RPL26 PE=2 SV=1	veNOG14999	J	GO:0006412//translation;GO:0006977//DNA damage response, signal transduction by p53 class mediator resulting in cell cycle arrest;GO:0071479//cellular response to ionizing radiation;GO:1902167//positive regulation of intrinsic apoptotic signaling pathway in response to DNA damage by p53 class mediator;	GO:0005840//ribosome;GO:0015934//large ribosomal subunit;GO:0022625//cytosolic large ribosomal subunit;	GO:0003723//RNA binding;GO:0003735//structural constituent of ribosome;	ko05171(Coronavirus disease - COVID-19);ko03010(Ribosome)
MSTRG.100451	ENSBGRG00000026685	MSTRG.100451.1	68850	19[-]39968366-39969681	19[+]39771426-39899516	MYH10	GO:0000146;GO:0000281;GO:0001725;GO:0003774;GO:0005515;GO:0005524;GO:0005524;GO:0005737;GO:0005829;GO:0005844;GO:0005938;GO:0016459;GO:0016460;GO:0030048;GO:0030496;GO:0031032;GO:0032154;GO:0035613;GO:0042641;GO:0043531;GO:0048027;GO:0050714;GO:0051015;GO:0051015;GO:0097513;GO:0003774;GO:0005515;GO:0005524;GO:0016459;GO:0051015;GO:0003774;GO:0005515;GO:0005524;GO:0016459;GO:0051015;	K10352	myosin heavy chain 10 [Source:HGNC Symbol;Acc:HGNC:7568]	sp|Q27991|MYH10_BOVIN Myosin-10 OS=Bos taurus OX=9913 GN=MYH10 PE=2 SV=2	veNOG07733	Z	GO:0000281//mitotic cytokinesis;GO:0030048//actin filament-based movement;GO:0031032//actomyosin structure organization;GO:0050714//positive regulation of protein secretion;	GO:0001725//stress fiber;GO:0005737//cytoplasm;GO:0005829//cytosol;GO:0005844//polysome;GO:0005938//cell cortex;GO:0016459//myosin complex;GO:0016460//myosin II complex;GO:0030496//midbody;GO:0032154//cleavage furrow;GO:0042641//actomyosin;GO:0097513//myosin II filament;GO:0016459//myosin complex;GO:0016459//myosin complex;	GO:0000146//microfilament motor activity;GO:0003774//cytoskeletal motor activity;GO:0005515//protein binding;GO:0005524//ATP binding;GO:0005524//ATP binding;GO:0035613//RNA stem-loop binding;GO:0043531//ADP binding;GO:0048027//mRNA 5'-UTR binding;GO:0051015//actin filament binding;GO:0051015//actin filament binding;GO:0003774//cytoskeletal motor activity;GO:0005515//protein binding;GO:0005524//AT…	ko05130(Pathogenic Escherichia coli infection);ko04810(Regulation of actin cytoskeleton);ko04530(Tight junction);ko04270(Vascular smooth muscle contraction)
MSTRG.100451	ENSBGRG00000026702	MSTRG.100451.1	50683	19[-]39968366-39969681	19[-]40020364-40025692	-	-	K25637	-	sp|Q2M2E3|ODFP4_HUMAN Outer dense fiber protein 4 OS=Homo sapiens OX=9606 GN=ODF4 PE=1 SV=2	veNOG12743	S	-	-	-	-
MSTRG.100451	ENSBGRG00000026700	MSTRG.100451.1	32430	19[-]39968366-39969681	19[+]40002111-40007167	KRBA2	GO:0003676;GO:0015074;	-	KRAB-A domain containing 2 [Source:HGNC Symbol;Acc:HGNC:26989]	sp|Q6ZNG9|KRBA2_HUMAN KRAB-A domain-containing protein 2 OS=Homo sapiens OX=9606 GN=KRBA2 PE=1 SV=1	opiNOG21659;veNOG13496	R	GO:0015074//DNA integration;	-	GO:0003676//nucleic acid binding;	-
MSTRG.100451	ENSBGRG00000026704	MSTRG.100451.1	71164	19[-]39968366-39969681	19[-]40040845-40050976	ARHGEF15	GO:0005085;GO:0005085;GO:0030425;GO:0050790;GO:0061299;GO:2000297;	K20687	Rho guanine nucleotide exchange factor 15 [Source:HGNC Symbol;Acc:HGNC:15590]	sp|O94989|ARHGF_HUMAN Rho guanine nucleotide exchange factor 15 OS=Homo sapiens OX=9606 GN=ARHGEF15 PE=1 SV=4	veNOG03810	T	GO:0050790//regulation of catalytic activity;GO:0061299//retina vasculature morphogenesis in camera-type eye;GO:2000297//negative regulation of synapse maturation;	GO:0030425//dendrite;	GO:0005085//guanyl-nucleotide exchange factor activity;GO:0005085//guanyl-nucleotide exchange factor activity;	-
MSTRG.100451	ENSBGRG00000026691	MSTRG.100451.1	1935	19[-]39968366-39969681	19[-]39909167-39966431	NDEL1	GO:0007100;GO:0007399;GO:0008017;GO:0060052;GO:0000226;GO:0000776;GO:0001764;GO:0001833;GO:0005813;GO:0005815;GO:0005875;GO:0007059;GO:0007100;GO:0007100;GO:0007399;GO:0008017;GO:0008017;GO:0008021;GO:0008090;GO:0008286;GO:0010975;GO:0016477;GO:0021799;GO:0021955;GO:0030424;GO:0031252;GO:0032418;GO:0033157;GO:0042802;GO:0043014;GO:0043203;GO:0043547;GO:0047496;GO:0048487;GO:0051642;GO:0060052;GO:…	K16739	nudE neurodevelopment protein 1 like 1 [Source:HGNC Symbol;Acc:HGNC:17620]	sp|O46480|NDEL1_RABIT Nuclear distribution protein nudE-like 1 OS=Oryctolagus cuniculus OX=9986 GN=NDEL1 PE=1 SV=3	veNOG02145	Z	GO:0007100//mitotic centrosome separation;GO:0007399//nervous system development;GO:0060052//neurofilament cytoskeleton organization;GO:0000226//microtubule cytoskeleton organization;GO:0001764//neuron migration;GO:0001833//inner cell mass cell proliferation;GO:0007059//chromosome segregation;GO:0007100//mitotic centrosome separation;GO:0007100//mitotic centrosome separation;GO:0007399//nervous s…	GO:0000776//kinetochore;GO:0005813//centrosome;GO:0005815//microtubule organizing center;GO:0005875//microtubule associated complex;GO:0008021//synaptic vesicle;GO:0030424//axon;GO:0031252//cell leading edge;GO:0043203//axon hillock;GO:0060053//neurofilament cytoskeleton;	GO:0008017//microtubule binding;GO:0008017//microtubule binding;GO:0008017//microtubule binding;GO:0042802//identical protein binding;GO:0043014//alpha-tubulin binding;GO:0048487//beta-tubulin binding;GO:0008017//microtubule binding;GO:0008017//microtubule binding;GO:0008017//microtubule binding;	-
MSTRG.100451	ENSBGRG00000026698	MSTRG.100451.1	17138	19[-]39968366-39969681	19[+]39986819-39987454	RNF222	-	-	ring finger protein 222 [Source:HGNC Symbol;Acc:HGNC:34517]	sp|Q8CEF8|RN222_MOUSE RING finger protein 222 OS=Mus musculus OX=10090 GN=Rnf222 PE=2 SV=2	veNOG12357;opiNOG40576	O	-	-	-	-
MSTRG.100453	ENSBGRG00000026699	MSTRG.100453.1	18482	19[-]39973275-39975931	19[+]39994413-40003153	-	GO:0003723;GO:0003735;GO:0005840;GO:0006412;GO:0006977;GO:0015934;GO:0022625;GO:0071479;GO:1902167;	K02898	ribosomal protein L26 [Source:HGNC Symbol;Acc:HGNC:10327]	sp|P61257|RL26_BOVIN 60S ribosomal protein L26 OS=Bos taurus OX=9913 GN=RPL26 PE=2 SV=1	veNOG14999	J	GO:0006412//translation;GO:0006977//DNA damage response, signal transduction by p53 class mediator resulting in cell cycle arrest;GO:0071479//cellular response to ionizing radiation;GO:1902167//positive regulation of intrinsic apoptotic signaling pathway in response to DNA damage by p53 class mediator;	GO:0005840//ribosome;GO:0015934//large ribosomal subunit;GO:0022625//cytosolic large ribosomal subunit;	GO:0003723//RNA binding;GO:0003735//structural constituent of ribosome;	ko05171(Coronavirus disease - COVID-19);ko03010(Ribosome)
MSTRG.100453	ENSBGRG00000026685	MSTRG.100453.1	73759	19[-]39973275-39975931	19[+]39771426-39899516	MYH10	GO:0000146;GO:0000281;GO:0001725;GO:0003774;GO:0005515;GO:0005524;GO:0005524;GO:0005737;GO:0005829;GO:0005844;GO:0005938;GO:0016459;GO:0016460;GO:0030048;GO:0030496;GO:0031032;GO:0032154;GO:0035613;GO:0042641;GO:0043531;GO:0048027;GO:0050714;GO:0051015;GO:0051015;GO:0097513;GO:0003774;GO:0005515;GO:0005524;GO:0016459;GO:0051015;GO:0003774;GO:0005515;GO:0005524;GO:0016459;GO:0051015;	K10352	myosin heavy chain 10 [Source:HGNC Symbol;Acc:HGNC:7568]	sp|Q27991|MYH10_BOVIN Myosin-10 OS=Bos taurus OX=9913 GN=MYH10 PE=2 SV=2	veNOG07733	Z	GO:0000281//mitotic cytokinesis;GO:0030048//actin filament-based movement;GO:0031032//actomyosin structure organization;GO:0050714//positive regulation of protein secretion;	GO:0001725//stress fiber;GO:0005737//cytoplasm;GO:0005829//cytosol;GO:0005844//polysome;GO:0005938//cell cortex;GO:0016459//myosin complex;GO:0016460//myosin II complex;GO:0030496//midbody;GO:0032154//cleavage furrow;GO:0042641//actomyosin;GO:0097513//myosin II filament;GO:0016459//myosin complex;GO:0016459//myosin complex;	GO:0000146//microfilament motor activity;GO:0003774//cytoskeletal motor activity;GO:0005515//protein binding;GO:0005524//ATP binding;GO:0005524//ATP binding;GO:0035613//RNA stem-loop binding;GO:0043531//ADP binding;GO:0048027//mRNA 5'-UTR binding;GO:0051015//actin filament binding;GO:0051015//actin filament binding;GO:0003774//cytoskeletal motor activity;GO:0005515//protein binding;GO:0005524//AT…	ko05130(Pathogenic Escherichia coli infection);ko04810(Regulation of actin cytoskeleton);ko04530(Tight junction);ko04270(Vascular smooth muscle contraction)
MSTRG.100453	ENSBGRG00000026702	MSTRG.100453.1	44433	19[-]39973275-39975931	19[-]40020364-40025692	-	-	K25637	-	sp|Q2M2E3|ODFP4_HUMAN Outer dense fiber protein 4 OS=Homo sapiens OX=9606 GN=ODF4 PE=1 SV=2	veNOG12743	S	-	-	-	-
MSTRG.100453	ENSBGRG00000026712	MSTRG.100453.1	94472	19[-]39973275-39975931	19[+]40070403-40074564	SLC25A35	-	K15117	solute carrier family 25 member 35 [Source:HGNC Symbol;Acc:HGNC:31921]	sp|Q5SWT3|S2535_MOUSE Solute carrier family 25 member 35 OS=Mus musculus OX=10090 GN=Slc25a35 PE=1 SV=2	veNOG15562	C	-	-	-	-
MSTRG.100453	ENSBGRG00000026700	MSTRG.100453.1	26180	19[-]39973275-39975931	19[+]40002111-40007167	KRBA2	GO:0003676;GO:0015074;	-	KRAB-A domain containing 2 [Source:HGNC Symbol;Acc:HGNC:26989]	sp|Q6ZNG9|KRBA2_HUMAN KRAB-A domain-containing protein 2 OS=Homo sapiens OX=9606 GN=KRBA2 PE=1 SV=1	opiNOG21659;veNOG13496	R	GO:0015074//DNA integration;	-	GO:0003676//nucleic acid binding;	-
MSTRG.100453	ENSBGRG00000026714	MSTRG.100453.1	99023	19[-]39973275-39975931	19[-]40074954-40076274	RANGRF	GO:0003254;GO:0005085;GO:0005634;GO:0005654;GO:0005654;GO:0005737;GO:0005791;GO:0005829;GO:0005901;GO:0006888;GO:0014704;GO:0017080;GO:0031267;GO:0031267;GO:0032527;GO:0042391;GO:0044325;GO:0090226;GO:0098905;GO:0098909;GO:1900825;GO:1902305;GO:1903078;GO:2000010;GO:2000649;	-	RAN guanine nucleotide release factor [Source:HGNC Symbol;Acc:HGNC:17679]	sp|Q32PE2|MOG1_BOVIN Ran guanine nucleotide release factor OS=Bos taurus OX=9913 GN=RANGRF PE=2 SV=1	veNOG00820	T	GO:0003254//regulation of membrane depolarization;GO:0006888//endoplasmic reticulum to Golgi vesicle-mediated transport;GO:0032527//protein exit from endoplasmic reticulum;GO:0042391//regulation of membrane potential;GO:0090226//regulation of microtubule nucleation by Ran protein signal transduction;GO:0098905//regulation of bundle of His cell action potential;GO:0098909//regulation of cardiac mu…	GO:0005634//nucleus;GO:0005654//nucleoplasm;GO:0005654//nucleoplasm;GO:0005737//cytoplasm;GO:0005791//rough endoplasmic reticulum;GO:0005829//cytosol;GO:0005901//caveola;GO:0014704//intercalated disc;	GO:0005085//guanyl-nucleotide exchange factor activity;GO:0017080//sodium channel regulator activity;GO:0031267//small GTPase binding;GO:0031267//small GTPase binding;GO:0044325//transmembrane transporter binding;	-
MSTRG.100453	ENSBGRG00000026704	MSTRG.100453.1	64914	19[-]39973275-39975931	19[-]40040845-40050976	ARHGEF15	GO:0005085;GO:0005085;GO:0030425;GO:0050790;GO:0061299;GO:2000297;	K20687	Rho guanine nucleotide exchange factor 15 [Source:HGNC Symbol;Acc:HGNC:15590]	sp|O94989|ARHGF_HUMAN Rho guanine nucleotide exchange factor 15 OS=Homo sapiens OX=9606 GN=ARHGEF15 PE=1 SV=4	veNOG03810	T	GO:0050790//regulation of catalytic activity;GO:0061299//retina vasculature morphogenesis in camera-type eye;GO:2000297//negative regulation of synapse maturation;	GO:0030425//dendrite;	GO:0005085//guanyl-nucleotide exchange factor activity;GO:0005085//guanyl-nucleotide exchange factor activity;	-
MSTRG.100453	ENSBGRG00000026691	MSTRG.100453.1	6844	19[-]39973275-39975931	19[-]39909167-39966431	NDEL1	GO:0007100;GO:0007399;GO:0008017;GO:0060052;GO:0000226;GO:0000776;GO:0001764;GO:0001833;GO:0005813;GO:0005815;GO:0005875;GO:0007059;GO:0007100;GO:0007100;GO:0007399;GO:0008017;GO:0008017;GO:0008021;GO:0008090;GO:0008286;GO:0010975;GO:0016477;GO:0021799;GO:0021955;GO:0030424;GO:0031252;GO:0032418;GO:0033157;GO:0042802;GO:0043014;GO:0043203;GO:0043547;GO:0047496;GO:0048487;GO:0051642;GO:0060052;GO:…	K16739	nudE neurodevelopment protein 1 like 1 [Source:HGNC Symbol;Acc:HGNC:17620]	sp|O46480|NDEL1_RABIT Nuclear distribution protein nudE-like 1 OS=Oryctolagus cuniculus OX=9986 GN=NDEL1 PE=1 SV=3	veNOG02145	Z	GO:0007100//mitotic centrosome separation;GO:0007399//nervous system development;GO:0060052//neurofilament cytoskeleton organization;GO:0000226//microtubule cytoskeleton organization;GO:0001764//neuron migration;GO:0001833//inner cell mass cell proliferation;GO:0007059//chromosome segregation;GO:0007100//mitotic centrosome separation;GO:0007100//mitotic centrosome separation;GO:0007399//nervous s…	GO:0000776//kinetochore;GO:0005813//centrosome;GO:0005815//microtubule organizing center;GO:0005875//microtubule associated complex;GO:0008021//synaptic vesicle;GO:0030424//axon;GO:0031252//cell leading edge;GO:0043203//axon hillock;GO:0060053//neurofilament cytoskeleton;	GO:0008017//microtubule binding;GO:0008017//microtubule binding;GO:0008017//microtubule binding;GO:0042802//identical protein binding;GO:0043014//alpha-tubulin binding;GO:0048487//beta-tubulin binding;GO:0008017//microtubule binding;GO:0008017//microtubule binding;GO:0008017//microtubule binding;	-
MSTRG.100453	ENSBGRG00000026698	MSTRG.100453.1	10888	19[-]39973275-39975931	19[+]39986819-39987454	RNF222	-	-	ring finger protein 222 [Source:HGNC Symbol;Acc:HGNC:34517]	sp|Q8CEF8|RN222_MOUSE RING finger protein 222 OS=Mus musculus OX=10090 GN=Rnf222 PE=2 SV=2	veNOG12357;opiNOG40576	O	-	-	-	-
MSTRG.100470	ENSBGRG00000026699	MSTRG.100470.1	9598	19[+]40012751-40013473	19[+]39994413-40003153	-	GO:0003723;GO:0003735;GO:0005840;GO:0006412;GO:0006977;GO:0015934;GO:0022625;GO:0071479;GO:1902167;	K02898	ribosomal protein L26 [Source:HGNC Symbol;Acc:HGNC:10327]	sp|P61257|RL26_BOVIN 60S ribosomal protein L26 OS=Bos taurus OX=9913 GN=RPL26 PE=2 SV=1	veNOG14999	J	GO:0006412//translation;GO:0006977//DNA damage response, signal transduction by p53 class mediator resulting in cell cycle arrest;GO:0071479//cellular response to ionizing radiation;GO:1902167//positive regulation of intrinsic apoptotic signaling pathway in response to DNA damage by p53 class mediator;	GO:0005840//ribosome;GO:0015934//large ribosomal subunit;GO:0022625//cytosolic large ribosomal subunit;	GO:0003723//RNA binding;GO:0003735//structural constituent of ribosome;	ko05171(Coronavirus disease - COVID-19);ko03010(Ribosome)
MSTRG.100470	ENSBGRG00000026723	MSTRG.100470.1	95569	19[+]40012751-40013473	19[+]40109042-40135834	CTC1	GO:0000723;GO:0000781;GO:0003697;GO:0003697;GO:0005634;GO:0005654;GO:0005829;GO:0006974;GO:0007568;GO:0010389;GO:0010833;GO:0032211;GO:0035264;GO:0042162;GO:0045740;GO:0048146;GO:0048536;GO:0048538;GO:0048539;GO:0051276;GO:0071425;GO:0090399;GO:0098505;GO:1990879;GO:1990879;	K23311	CST telomere replication complex component 1 [Source:HGNC Symbol;Acc:HGNC:26169]	sp|Q2NKJ3|CTC1_HUMAN CST complex subunit CTC1 OS=Homo sapiens OX=9606 GN=CTC1 PE=1 SV=2	veNOG09495	S	GO:0000723//telomere maintenance;GO:0006974//cellular response to DNA damage stimulus;GO:0007568//aging;GO:0010389//regulation of G2/M transition of mitotic cell cycle;GO:0010833//telomere maintenance via telomere lengthening;GO:0032211//negative regulation of telomere maintenance via telomerase;GO:0035264//multicellular organism growth;GO:0045740//positive regulation of DNA replication;GO:004814…	GO:0000781//chromosome, telomeric region;GO:0005634//nucleus;GO:0005654//nucleoplasm;GO:0005829//cytosol;GO:1990879//CST complex;GO:1990879//CST complex;	GO:0003697//single-stranded DNA binding;GO:0003697//single-stranded DNA binding;GO:0042162//telomeric DNA binding;GO:0098505//G-rich strand telomeric DNA binding;	-
MSTRG.100470	ENSBGRG00000026702	MSTRG.100470.1	6891	19[+]40012751-40013473	19[-]40020364-40025692	-	-	K25637	-	sp|Q2M2E3|ODFP4_HUMAN Outer dense fiber protein 4 OS=Homo sapiens OX=9606 GN=ODF4 PE=1 SV=2	veNOG12743	S	-	-	-	-
MSTRG.100470	ENSBGRG00000026717	MSTRG.100470.1	71507	19[+]40012751-40013473	19[-]40084980-40102659	PFAS	GO:0004642;GO:0004642;GO:0006177;GO:0006189;GO:0006189;GO:0044208;GO:0097065;GO:0097294;GO:0004642;GO:0006189;GO:0004642;GO:0006189;	K01952	phosphoribosylformylglycinamidine synthase [Source:HGNC Symbol;Acc:HGNC:8863]	sp|O15067|PUR4_HUMAN Phosphoribosylformylglycinamidine synthase OS=Homo sapiens OX=9606 GN=PFAS PE=1 SV=4	veNOG00490	F	GO:0006177//GMP biosynthetic process;GO:0006189//'de novo' IMP biosynthetic process;GO:0006189//'de novo' IMP biosynthetic process;GO:0044208//'de novo' AMP biosynthetic process;GO:0097065//anterior head development;GO:0097294//'de novo' XMP biosynthetic process;GO:0006189//'de novo' IMP biosynthetic process;GO:0006189//'de novo' IMP biosynthetic process;	-	GO:0004642//phosphoribosylformylglycinamidine synthase activity;GO:0004642//phosphoribosylformylglycinamidine synthase activity;GO:0004642//phosphoribosylformylglycinamidine synthase activity;GO:0004642//phosphoribosylformylglycinamidine synthase activity;	ko00230(Purine metabolism)
MSTRG.100470	ENSBGRG00000026712	MSTRG.100470.1	56930	19[+]40012751-40013473	19[+]40070403-40074564	SLC25A35	-	K15117	solute carrier family 25 member 35 [Source:HGNC Symbol;Acc:HGNC:31921]	sp|Q5SWT3|S2535_MOUSE Solute carrier family 25 member 35 OS=Mus musculus OX=10090 GN=Slc25a35 PE=1 SV=2	veNOG15562	C	-	-	-	-
MSTRG.100470	ENSBGRG00000026700	MSTRG.100470.1	5584	19[+]40012751-40013473	19[+]40002111-40007167	KRBA2	GO:0003676;GO:0015074;	-	KRAB-A domain containing 2 [Source:HGNC Symbol;Acc:HGNC:26989]	sp|Q6ZNG9|KRBA2_HUMAN KRAB-A domain-containing protein 2 OS=Homo sapiens OX=9606 GN=KRBA2 PE=1 SV=1	opiNOG21659;veNOG13496	R	GO:0015074//DNA integration;	-	GO:0003676//nucleic acid binding;	-
MSTRG.100470	ENSBGRG00000026714	MSTRG.100470.1	61481	19[+]40012751-40013473	19[-]40074954-40076274	RANGRF	GO:0003254;GO:0005085;GO:0005634;GO:0005654;GO:0005654;GO:0005737;GO:0005791;GO:0005829;GO:0005901;GO:0006888;GO:0014704;GO:0017080;GO:0031267;GO:0031267;GO:0032527;GO:0042391;GO:0044325;GO:0090226;GO:0098905;GO:0098909;GO:1900825;GO:1902305;GO:1903078;GO:2000010;GO:2000649;	-	RAN guanine nucleotide release factor [Source:HGNC Symbol;Acc:HGNC:17679]	sp|Q32PE2|MOG1_BOVIN Ran guanine nucleotide release factor OS=Bos taurus OX=9913 GN=RANGRF PE=2 SV=1	veNOG00820	T	GO:0003254//regulation of membrane depolarization;GO:0006888//endoplasmic reticulum to Golgi vesicle-mediated transport;GO:0032527//protein exit from endoplasmic reticulum;GO:0042391//regulation of membrane potential;GO:0090226//regulation of microtubule nucleation by Ran protein signal transduction;GO:0098905//regulation of bundle of His cell action potential;GO:0098909//regulation of cardiac mu…	GO:0005634//nucleus;GO:0005654//nucleoplasm;GO:0005654//nucleoplasm;GO:0005737//cytoplasm;GO:0005791//rough endoplasmic reticulum;GO:0005829//cytosol;GO:0005901//caveola;GO:0014704//intercalated disc;	GO:0005085//guanyl-nucleotide exchange factor activity;GO:0017080//sodium channel regulator activity;GO:0031267//small GTPase binding;GO:0031267//small GTPase binding;GO:0044325//transmembrane transporter binding;	-
MSTRG.100470	ENSBGRG00000026704	MSTRG.100470.1	27372	19[+]40012751-40013473	19[-]40040845-40050976	ARHGEF15	GO:0005085;GO:0005085;GO:0030425;GO:0050790;GO:0061299;GO:2000297;	K20687	Rho guanine nucleotide exchange factor 15 [Source:HGNC Symbol;Acc:HGNC:15590]	sp|O94989|ARHGF_HUMAN Rho guanine nucleotide exchange factor 15 OS=Homo sapiens OX=9606 GN=ARHGEF15 PE=1 SV=4	veNOG03810	T	GO:0050790//regulation of catalytic activity;GO:0061299//retina vasculature morphogenesis in camera-type eye;GO:2000297//negative regulation of synapse maturation;	GO:0030425//dendrite;	GO:0005085//guanyl-nucleotide exchange factor activity;GO:0005085//guanyl-nucleotide exchange factor activity;	-
MSTRG.100470	ENSBGRG00000026691	MSTRG.100470.1	46320	19[+]40012751-40013473	19[-]39909167-39966431	NDEL1	GO:0007100;GO:0007399;GO:0008017;GO:0060052;GO:0000226;GO:0000776;GO:0001764;GO:0001833;GO:0005813;GO:0005815;GO:0005875;GO:0007059;GO:0007100;GO:0007100;GO:0007399;GO:0008017;GO:0008017;GO:0008021;GO:0008090;GO:0008286;GO:0010975;GO:0016477;GO:0021799;GO:0021955;GO:0030424;GO:0031252;GO:0032418;GO:0033157;GO:0042802;GO:0043014;GO:0043203;GO:0043547;GO:0047496;GO:0048487;GO:0051642;GO:0060052;GO:…	K16739	nudE neurodevelopment protein 1 like 1 [Source:HGNC Symbol;Acc:HGNC:17620]	sp|O46480|NDEL1_RABIT Nuclear distribution protein nudE-like 1 OS=Oryctolagus cuniculus OX=9986 GN=NDEL1 PE=1 SV=3	veNOG02145	Z	GO:0007100//mitotic centrosome separation;GO:0007399//nervous system development;GO:0060052//neurofilament cytoskeleton organization;GO:0000226//microtubule cytoskeleton organization;GO:0001764//neuron migration;GO:0001833//inner cell mass cell proliferation;GO:0007059//chromosome segregation;GO:0007100//mitotic centrosome separation;GO:0007100//mitotic centrosome separation;GO:0007399//nervous s…	GO:0000776//kinetochore;GO:0005813//centrosome;GO:0005815//microtubule organizing center;GO:0005875//microtubule associated complex;GO:0008021//synaptic vesicle;GO:0030424//axon;GO:0031252//cell leading edge;GO:0043203//axon hillock;GO:0060053//neurofilament cytoskeleton;	GO:0008017//microtubule binding;GO:0008017//microtubule binding;GO:0008017//microtubule binding;GO:0042802//identical protein binding;GO:0043014//alpha-tubulin binding;GO:0048487//beta-tubulin binding;GO:0008017//microtubule binding;GO:0008017//microtubule binding;GO:0008017//microtubule binding;	-
MSTRG.100470	ENSBGRG00000026698	MSTRG.100470.1	25297	19[+]40012751-40013473	19[+]39986819-39987454	RNF222	-	-	ring finger protein 222 [Source:HGNC Symbol;Acc:HGNC:34517]	sp|Q8CEF8|RN222_MOUSE RING finger protein 222 OS=Mus musculus OX=10090 GN=Rnf222 PE=2 SV=2	veNOG12357;opiNOG40576	O	-	-	-	-
MSTRG.100471	ENSBGRG00000026699	MSTRG.100471.1	10789	19[+]40013942-40015339	19[+]39994413-40003153	-	GO:0003723;GO:0003735;GO:0005840;GO:0006412;GO:0006977;GO:0015934;GO:0022625;GO:0071479;GO:1902167;	K02898	ribosomal protein L26 [Source:HGNC Symbol;Acc:HGNC:10327]	sp|P61257|RL26_BOVIN 60S ribosomal protein L26 OS=Bos taurus OX=9913 GN=RPL26 PE=2 SV=1	veNOG14999	J	GO:0006412//translation;GO:0006977//DNA damage response, signal transduction by p53 class mediator resulting in cell cycle arrest;GO:0071479//cellular response to ionizing radiation;GO:1902167//positive regulation of intrinsic apoptotic signaling pathway in response to DNA damage by p53 class mediator;	GO:0005840//ribosome;GO:0015934//large ribosomal subunit;GO:0022625//cytosolic large ribosomal subunit;	GO:0003723//RNA binding;GO:0003735//structural constituent of ribosome;	ko05171(Coronavirus disease - COVID-19);ko03010(Ribosome)
MSTRG.100471	ENSBGRG00000026723	MSTRG.100471.1	93703	19[+]40013942-40015339	19[+]40109042-40135834	CTC1	GO:0000723;GO:0000781;GO:0003697;GO:0003697;GO:0005634;GO:0005654;GO:0005829;GO:0006974;GO:0007568;GO:0010389;GO:0010833;GO:0032211;GO:0035264;GO:0042162;GO:0045740;GO:0048146;GO:0048536;GO:0048538;GO:0048539;GO:0051276;GO:0071425;GO:0090399;GO:0098505;GO:1990879;GO:1990879;	K23311	CST telomere replication complex component 1 [Source:HGNC Symbol;Acc:HGNC:26169]	sp|Q2NKJ3|CTC1_HUMAN CST complex subunit CTC1 OS=Homo sapiens OX=9606 GN=CTC1 PE=1 SV=2	veNOG09495	S	GO:0000723//telomere maintenance;GO:0006974//cellular response to DNA damage stimulus;GO:0007568//aging;GO:0010389//regulation of G2/M transition of mitotic cell cycle;GO:0010833//telomere maintenance via telomere lengthening;GO:0032211//negative regulation of telomere maintenance via telomerase;GO:0035264//multicellular organism growth;GO:0045740//positive regulation of DNA replication;GO:004814…	GO:0000781//chromosome, telomeric region;GO:0005634//nucleus;GO:0005654//nucleoplasm;GO:0005829//cytosol;GO:1990879//CST complex;GO:1990879//CST complex;	GO:0003697//single-stranded DNA binding;GO:0003697//single-stranded DNA binding;GO:0042162//telomeric DNA binding;GO:0098505//G-rich strand telomeric DNA binding;	-
MSTRG.100471	ENSBGRG00000026702	MSTRG.100471.1	5025	19[+]40013942-40015339	19[-]40020364-40025692	-	-	K25637	-	sp|Q2M2E3|ODFP4_HUMAN Outer dense fiber protein 4 OS=Homo sapiens OX=9606 GN=ODF4 PE=1 SV=2	veNOG12743	S	-	-	-	-
MSTRG.100471	ENSBGRG00000026717	MSTRG.100471.1	69641	19[+]40013942-40015339	19[-]40084980-40102659	PFAS	GO:0004642;GO:0004642;GO:0006177;GO:0006189;GO:0006189;GO:0044208;GO:0097065;GO:0097294;GO:0004642;GO:0006189;GO:0004642;GO:0006189;	K01952	phosphoribosylformylglycinamidine synthase [Source:HGNC Symbol;Acc:HGNC:8863]	sp|O15067|PUR4_HUMAN Phosphoribosylformylglycinamidine synthase OS=Homo sapiens OX=9606 GN=PFAS PE=1 SV=4	veNOG00490	F	GO:0006177//GMP biosynthetic process;GO:0006189//'de novo' IMP biosynthetic process;GO:0006189//'de novo' IMP biosynthetic process;GO:0044208//'de novo' AMP biosynthetic process;GO:0097065//anterior head development;GO:0097294//'de novo' XMP biosynthetic process;GO:0006189//'de novo' IMP biosynthetic process;GO:0006189//'de novo' IMP biosynthetic process;	-	GO:0004642//phosphoribosylformylglycinamidine synthase activity;GO:0004642//phosphoribosylformylglycinamidine synthase activity;GO:0004642//phosphoribosylformylglycinamidine synthase activity;GO:0004642//phosphoribosylformylglycinamidine synthase activity;	ko00230(Purine metabolism)
MSTRG.100471	ENSBGRG00000026712	MSTRG.100471.1	55064	19[+]40013942-40015339	19[+]40070403-40074564	SLC25A35	-	K15117	solute carrier family 25 member 35 [Source:HGNC Symbol;Acc:HGNC:31921]	sp|Q5SWT3|S2535_MOUSE Solute carrier family 25 member 35 OS=Mus musculus OX=10090 GN=Slc25a35 PE=1 SV=2	veNOG15562	C	-	-	-	-
MSTRG.100471	ENSBGRG00000026700	MSTRG.100471.1	6775	19[+]40013942-40015339	19[+]40002111-40007167	KRBA2	GO:0003676;GO:0015074;	-	KRAB-A domain containing 2 [Source:HGNC Symbol;Acc:HGNC:26989]	sp|Q6ZNG9|KRBA2_HUMAN KRAB-A domain-containing protein 2 OS=Homo sapiens OX=9606 GN=KRBA2 PE=1 SV=1	opiNOG21659;veNOG13496	R	GO:0015074//DNA integration;	-	GO:0003676//nucleic acid binding;	-
MSTRG.100471	ENSBGRG00000026714	MSTRG.100471.1	59615	19[+]40013942-40015339	19[-]40074954-40076274	RANGRF	GO:0003254;GO:0005085;GO:0005634;GO:0005654;GO:0005654;GO:0005737;GO:0005791;GO:0005829;GO:0005901;GO:0006888;GO:0014704;GO:0017080;GO:0031267;GO:0031267;GO:0032527;GO:0042391;GO:0044325;GO:0090226;GO:0098905;GO:0098909;GO:1900825;GO:1902305;GO:1903078;GO:2000010;GO:2000649;	-	RAN guanine nucleotide release factor [Source:HGNC Symbol;Acc:HGNC:17679]	sp|Q32PE2|MOG1_BOVIN Ran guanine nucleotide release factor OS=Bos taurus OX=9913 GN=RANGRF PE=2 SV=1	veNOG00820	T	GO:0003254//regulation of membrane depolarization;GO:0006888//endoplasmic reticulum to Golgi vesicle-mediated transport;GO:0032527//protein exit from endoplasmic reticulum;GO:0042391//regulation of membrane potential;GO:0090226//regulation of microtubule nucleation by Ran protein signal transduction;GO:0098905//regulation of bundle of His cell action potential;GO:0098909//regulation of cardiac mu…	GO:0005634//nucleus;GO:0005654//nucleoplasm;GO:0005654//nucleoplasm;GO:0005737//cytoplasm;GO:0005791//rough endoplasmic reticulum;GO:0005829//cytosol;GO:0005901//caveola;GO:0014704//intercalated disc;	GO:0005085//guanyl-nucleotide exchange factor activity;GO:0017080//sodium channel regulator activity;GO:0031267//small GTPase binding;GO:0031267//small GTPase binding;GO:0044325//transmembrane transporter binding;	-
MSTRG.100471	ENSBGRG00000026704	MSTRG.100471.1	25506	19[+]40013942-40015339	19[-]40040845-40050976	ARHGEF15	GO:0005085;GO:0005085;GO:0030425;GO:0050790;GO:0061299;GO:2000297;	K20687	Rho guanine nucleotide exchange factor 15 [Source:HGNC Symbol;Acc:HGNC:15590]	sp|O94989|ARHGF_HUMAN Rho guanine nucleotide exchange factor 15 OS=Homo sapiens OX=9606 GN=ARHGEF15 PE=1 SV=4	veNOG03810	T	GO:0050790//regulation of catalytic activity;GO:0061299//retina vasculature morphogenesis in camera-type eye;GO:2000297//negative regulation of synapse maturation;	GO:0030425//dendrite;	GO:0005085//guanyl-nucleotide exchange factor activity;GO:0005085//guanyl-nucleotide exchange factor activity;	-
MSTRG.100471	ENSBGRG00000026691	MSTRG.100471.1	47511	19[+]40013942-40015339	19[-]39909167-39966431	NDEL1	GO:0007100;GO:0007399;GO:0008017;GO:0060052;GO:0000226;GO:0000776;GO:0001764;GO:0001833;GO:0005813;GO:0005815;GO:0005875;GO:0007059;GO:0007100;GO:0007100;GO:0007399;GO:0008017;GO:0008017;GO:0008021;GO:0008090;GO:0008286;GO:0010975;GO:0016477;GO:0021799;GO:0021955;GO:0030424;GO:0031252;GO:0032418;GO:0033157;GO:0042802;GO:0043014;GO:0043203;GO:0043547;GO:0047496;GO:0048487;GO:0051642;GO:0060052;GO:…	K16739	nudE neurodevelopment protein 1 like 1 [Source:HGNC Symbol;Acc:HGNC:17620]	sp|O46480|NDEL1_RABIT Nuclear distribution protein nudE-like 1 OS=Oryctolagus cuniculus OX=9986 GN=NDEL1 PE=1 SV=3	veNOG02145	Z	GO:0007100//mitotic centrosome separation;GO:0007399//nervous system development;GO:0060052//neurofilament cytoskeleton organization;GO:0000226//microtubule cytoskeleton organization;GO:0001764//neuron migration;GO:0001833//inner cell mass cell proliferation;GO:0007059//chromosome segregation;GO:0007100//mitotic centrosome separation;GO:0007100//mitotic centrosome separation;GO:0007399//nervous s…	GO:0000776//kinetochore;GO:0005813//centrosome;GO:0005815//microtubule organizing center;GO:0005875//microtubule associated complex;GO:0008021//synaptic vesicle;GO:0030424//axon;GO:0031252//cell leading edge;GO:0043203//axon hillock;GO:0060053//neurofilament cytoskeleton;	GO:0008017//microtubule binding;GO:0008017//microtubule binding;GO:0008017//microtubule binding;GO:0042802//identical protein binding;GO:0043014//alpha-tubulin binding;GO:0048487//beta-tubulin binding;GO:0008017//microtubule binding;GO:0008017//microtubule binding;GO:0008017//microtubule binding;	-
MSTRG.100471	ENSBGRG00000026698	MSTRG.100471.1	26488	19[+]40013942-40015339	19[+]39986819-39987454	RNF222	-	-	ring finger protein 222 [Source:HGNC Symbol;Acc:HGNC:34517]	sp|Q8CEF8|RN222_MOUSE RING finger protein 222 OS=Mus musculus OX=10090 GN=Rnf222 PE=2 SV=2	veNOG12357;opiNOG40576	O	-	-	-	-
MSTRG.10049	ENSBGRG00000015425	MSTRG.10049.1	0	1[-]118713171-118714601	1[-]118642582-119113781	RSRC1	GO:0000380;GO:0000380;GO:0000398;GO:0000398;GO:0005634;GO:0005737;GO:0006468;GO:0006913;GO:0008380;GO:0016607;GO:0046677;GO:0000380;GO:0000398;GO:0000380;GO:0000398;GO:0000380;GO:0000398;	K24594	arginine and serine rich coiled-coil 1 [Source:HGNC Symbol;Acc:HGNC:24152]	sp|Q2T9Y0|RSRC1_BOVIN Serine/Arginine-related protein 53 OS=Bos taurus OX=9913 GN=RSRC1 PE=2 SV=1	veNOG18112	J	GO:0000380//alternative mRNA splicing, via spliceosome;GO:0000380//alternative mRNA splicing, via spliceosome;GO:0000398//mRNA splicing, via spliceosome;GO:0000398//mRNA splicing, via spliceosome;GO:0006468//protein phosphorylation;GO:0006913//nucleocytoplasmic transport;GO:0008380//RNA splicing;GO:0046677//response to antibiotic;GO:0000380//alternative mRNA splicing, via spliceosome;GO:0000398//…	GO:0005634//nucleus;GO:0005737//cytoplasm;GO:0016607//nuclear speck;	-	-
MSTRG.10049	ENSBGRG00000015623	MSTRG.10049.1	30133	1[-]118713171-118714601	1[+]118744734-118745597	-	GO:0003735;GO:0005840;GO:0006412;	K02934	-	sp|Q58DQ3|RL6_BOVIN 60S ribosomal protein L6 OS=Bos taurus OX=9913 GN=RPL6 PE=2 SV=3	veNOG11695	J	GO:0006412//translation;	GO:0005840//ribosome;	GO:0003735//structural constituent of ribosome;	ko05171(Coronavirus disease - COVID-19);ko03010(Ribosome)
MSTRG.100496	ENSBGRG00000026723	MSTRG.100496.1	0	19[+]40117078-40118387	19[+]40109042-40135834	CTC1	GO:0000723;GO:0000781;GO:0003697;GO:0003697;GO:0005634;GO:0005654;GO:0005829;GO:0006974;GO:0007568;GO:0010389;GO:0010833;GO:0032211;GO:0035264;GO:0042162;GO:0045740;GO:0048146;GO:0048536;GO:0048538;GO:0048539;GO:0051276;GO:0071425;GO:0090399;GO:0098505;GO:1990879;GO:1990879;	K23311	CST telomere replication complex component 1 [Source:HGNC Symbol;Acc:HGNC:26169]	sp|Q2NKJ3|CTC1_HUMAN CST complex subunit CTC1 OS=Homo sapiens OX=9606 GN=CTC1 PE=1 SV=2	veNOG09495	S	GO:0000723//telomere maintenance;GO:0006974//cellular response to DNA damage stimulus;GO:0007568//aging;GO:0010389//regulation of G2/M transition of mitotic cell cycle;GO:0010833//telomere maintenance via telomere lengthening;GO:0032211//negative regulation of telomere maintenance via telomerase;GO:0035264//multicellular organism growth;GO:0045740//positive regulation of DNA replication;GO:004814…	GO:0000781//chromosome, telomeric region;GO:0005634//nucleus;GO:0005654//nucleoplasm;GO:0005829//cytosol;GO:1990879//CST complex;GO:1990879//CST complex;	GO:0003697//single-stranded DNA binding;GO:0003697//single-stranded DNA binding;GO:0042162//telomeric DNA binding;GO:0098505//G-rich strand telomeric DNA binding;	-
MSTRG.100496	ENSBGRG00000026702	MSTRG.100496.1	91386	19[+]40117078-40118387	19[-]40020364-40025692	-	-	K25637	-	sp|Q2M2E3|ODFP4_HUMAN Outer dense fiber protein 4 OS=Homo sapiens OX=9606 GN=ODF4 PE=1 SV=2	veNOG12743	S	-	-	-	-
MSTRG.100496	ENSBGRG00000026732	MSTRG.100496.1	60420	19[+]40117078-40118387	19[+]40178807-40179621	-	-	-	-	sp|Q6NZB0|DNJC8_MOUSE DnaJ homolog subfamily C member 8 OS=Mus musculus OX=10090 GN=Dnajc8 PE=1 SV=2	veNOG07961	O	-	-	-	-
MSTRG.100496	ENSBGRG00000026717	MSTRG.100496.1	14419	19[+]40117078-40118387	19[-]40084980-40102659	PFAS	GO:0004642;GO:0004642;GO:0006177;GO:0006189;GO:0006189;GO:0044208;GO:0097065;GO:0097294;GO:0004642;GO:0006189;GO:0004642;GO:0006189;	K01952	phosphoribosylformylglycinamidine synthase [Source:HGNC Symbol;Acc:HGNC:8863]	sp|O15067|PUR4_HUMAN Phosphoribosylformylglycinamidine synthase OS=Homo sapiens OX=9606 GN=PFAS PE=1 SV=4	veNOG00490	F	GO:0006177//GMP biosynthetic process;GO:0006189//'de novo' IMP biosynthetic process;GO:0006189//'de novo' IMP biosynthetic process;GO:0044208//'de novo' AMP biosynthetic process;GO:0097065//anterior head development;GO:0097294//'de novo' XMP biosynthetic process;GO:0006189//'de novo' IMP biosynthetic process;GO:0006189//'de novo' IMP biosynthetic process;	-	GO:0004642//phosphoribosylformylglycinamidine synthase activity;GO:0004642//phosphoribosylformylglycinamidine synthase activity;GO:0004642//phosphoribosylformylglycinamidine synthase activity;GO:0004642//phosphoribosylformylglycinamidine synthase activity;	ko00230(Purine metabolism)
MSTRG.100496	ENSBGRG00000026712	MSTRG.100496.1	42514	19[+]40117078-40118387	19[+]40070403-40074564	SLC25A35	-	K15117	solute carrier family 25 member 35 [Source:HGNC Symbol;Acc:HGNC:31921]	sp|Q5SWT3|S2535_MOUSE Solute carrier family 25 member 35 OS=Mus musculus OX=10090 GN=Slc25a35 PE=1 SV=2	veNOG15562	C	-	-	-	-
MSTRG.100496	ENSBGRG00000026729	MSTRG.100496.1	39163	19[+]40117078-40118387	19[+]40157550-40158611	BORCS6	GO:0032418;GO:0042802;GO:0099078;	K20820	BLOC-1 related complex subunit 6 [Source:HGNC Symbol;Acc:HGNC:25939]	sp|Q3SX20|BORC6_BOVIN BLOC-1-related complex subunit 6 OS=Bos taurus OX=9913 GN=BORCS6 PE=2 SV=2	veNOG15253	S	GO:0032418//lysosome localization;	GO:0099078//BORC complex;	GO:0042802//identical protein binding;	-
MSTRG.100496	ENSBGRG00000026714	MSTRG.100496.1	40804	19[+]40117078-40118387	19[-]40074954-40076274	RANGRF	GO:0003254;GO:0005085;GO:0005634;GO:0005654;GO:0005654;GO:0005737;GO:0005791;GO:0005829;GO:0005901;GO:0006888;GO:0014704;GO:0017080;GO:0031267;GO:0031267;GO:0032527;GO:0042391;GO:0044325;GO:0090226;GO:0098905;GO:0098909;GO:1900825;GO:1902305;GO:1903078;GO:2000010;GO:2000649;	-	RAN guanine nucleotide release factor [Source:HGNC Symbol;Acc:HGNC:17679]	sp|Q32PE2|MOG1_BOVIN Ran guanine nucleotide release factor OS=Bos taurus OX=9913 GN=RANGRF PE=2 SV=1	veNOG00820	T	GO:0003254//regulation of membrane depolarization;GO:0006888//endoplasmic reticulum to Golgi vesicle-mediated transport;GO:0032527//protein exit from endoplasmic reticulum;GO:0042391//regulation of membrane potential;GO:0090226//regulation of microtubule nucleation by Ran protein signal transduction;GO:0098905//regulation of bundle of His cell action potential;GO:0098909//regulation of cardiac mu…	GO:0005634//nucleus;GO:0005654//nucleoplasm;GO:0005654//nucleoplasm;GO:0005737//cytoplasm;GO:0005791//rough endoplasmic reticulum;GO:0005829//cytosol;GO:0005901//caveola;GO:0014704//intercalated disc;	GO:0005085//guanyl-nucleotide exchange factor activity;GO:0017080//sodium channel regulator activity;GO:0031267//small GTPase binding;GO:0031267//small GTPase binding;GO:0044325//transmembrane transporter binding;	-
MSTRG.100496	ENSBGRG00000026734	MSTRG.100496.1	74194	19[+]40117078-40118387	19[+]40192581-40196887	VAMP2	GO:0016021;GO:0016192;GO:0006906;GO:0016020;GO:0016021;GO:0016192;GO:0019905;GO:0030136;GO:0031201;GO:0031982;GO:0043308;	K13504	vesicle associated membrane protein 2 [Source:HGNC Symbol;Acc:HGNC:12643]	sp|P63026|VAMP2_BOVIN Vesicle-associated membrane protein 2 OS=Bos taurus OX=9913 GN=VAMP2 PE=1 SV=2	veNOG23198	U	GO:0016192//vesicle-mediated transport;GO:0006906//vesicle fusion;GO:0016192//vesicle-mediated transport;GO:0043308//eosinophil degranulation;	GO:0016021//integral component of membrane;GO:0016020//membrane;GO:0016021//integral component of membrane;GO:0030136//clathrin-coated vesicle;GO:0031201//SNARE complex;GO:0031982//vesicle;	GO:0019905//syntaxin binding;	ko04970(Salivary secretion);ko04962(Vasopressin-regulated water reabsorption);ko04911(Insulin secretion);ko04721(Synaptic vesicle cycle);ko04130(SNARE interactions in vesicular transport)
MSTRG.100496	ENSBGRG00000026704	MSTRG.100496.1	66102	19[+]40117078-40118387	19[-]40040845-40050976	ARHGEF15	GO:0005085;GO:0005085;GO:0030425;GO:0050790;GO:0061299;GO:2000297;	K20687	Rho guanine nucleotide exchange factor 15 [Source:HGNC Symbol;Acc:HGNC:15590]	sp|O94989|ARHGF_HUMAN Rho guanine nucleotide exchange factor 15 OS=Homo sapiens OX=9606 GN=ARHGEF15 PE=1 SV=4	veNOG03810	T	GO:0050790//regulation of catalytic activity;GO:0061299//retina vasculature morphogenesis in camera-type eye;GO:2000297//negative regulation of synapse maturation;	GO:0030425//dendrite;	GO:0005085//guanyl-nucleotide exchange factor activity;GO:0005085//guanyl-nucleotide exchange factor activity;	-
MSTRG.100496	ENSBGRG00000026730	MSTRG.100496.1	49014	19[+]40117078-40118387	19[+]40167401-40169246	TMEM107	GO:0003127;GO:0007368;GO:0010468;GO:0021532;GO:0035869;GO:0035869;GO:0036038;GO:0042733;GO:0044782;GO:0060021;GO:0060271;GO:0097094;GO:1904491;GO:1905515;	K22764	transmembrane protein 107 [Source:HGNC Symbol;Acc:HGNC:28128]	sp|Q6UX40|TM107_HUMAN Transmembrane protein 107 OS=Homo sapiens OX=9606 GN=TMEM107 PE=1 SV=1	veNOG19453	S	GO:0003127//detection of nodal flow;GO:0007368//determination of left/right symmetry;GO:0010468//regulation of gene expression;GO:0021532//neural tube patterning;GO:0042733//embryonic digit morphogenesis;GO:0044782//cilium organization;GO:0060021//roof of mouth development;GO:0060271//cilium assembly;GO:0097094//craniofacial suture morphogenesis;GO:1904491//protein localization to ciliary transit…	GO:0035869//ciliary transition zone;GO:0035869//ciliary transition zone;GO:0036038//MKS complex;	-	-
MSTRG.100496	ENSBGRG00000026728	MSTRG.100496.1	38418	19[+]40117078-40118387	19[-]40156805-40158090	-	-	-	-	-	-	-	-	-	-	-
MSTRG.100496	ENSBGRG00000026736	MSTRG.100496.1	88584	19[+]40117078-40118387	19[+]40206971-40217126	PER1	GO:0000122;GO:0000976;GO:0000978;GO:0002028;GO:0005515;GO:0005634;GO:0005654;GO:0005737;GO:0005829;GO:0007623;GO:0007623;GO:0009416;GO:0010608;GO:0019900;GO:0031490;GO:0031625;GO:0032922;GO:0032922;GO:0042634;GO:0042752;GO:0043153;GO:0043966;GO:0043967;GO:0045892;GO:0045944;GO:0051591;GO:0070888;GO:0070932;GO:0097167;GO:0140297;GO:2000323;	K21944	period circadian regulator 1 [Source:HGNC Symbol;Acc:HGNC:8845]	sp|Q8CHI5|PER1_RAT Period circadian protein homolog 1 OS=Rattus norvegicus OX=10116 GN=Per1 PE=1 SV=2	veNOG03468	T	GO:0000122//negative regulation of transcription by RNA polymerase II;GO:0002028//regulation of sodium ion transport;GO:0007623//circadian rhythm;GO:0007623//circadian rhythm;GO:0009416//response to light stimulus;GO:0010608//posttranscriptional regulation of gene expression;GO:0032922//circadian regulation of gene expression;GO:0032922//circadian regulation of gene expression;GO:0042634//regulat…	GO:0005634//nucleus;GO:0005654//nucleoplasm;GO:0005737//cytoplasm;GO:0005829//cytosol;	GO:0000976//transcription cis-regulatory region binding;GO:0000978//RNA polymerase II cis-regulatory region sequence-specific DNA binding;GO:0005515//protein binding;GO:0019900//kinase binding;GO:0031490//chromatin DNA binding;GO:0031625//ubiquitin protein ligase binding;GO:0070888//E-box binding;GO:0140297//DNA-binding transcription factor binding;	ko04713(Circadian entrainment);ko04710(Circadian rhythm)
MSTRG.100496	ENSBGRG00000026727	MSTRG.100496.1	31140	19[+]40117078-40118387	19[+]40149527-40153755	AURKB	GO:0000122;GO:0000775;GO:0000776;GO:0000779;GO:0000779;GO:0002903;GO:0004672;GO:0004674;GO:0004674;GO:0004674;GO:0005524;GO:0005634;GO:0005634;GO:0005654;GO:0005694;GO:0006468;GO:0006468;GO:0007051;GO:0007094;GO:0010369;GO:0015630;GO:0019900;GO:0030496;GO:0030496;GO:0032091;GO:0032133;GO:0032133;GO:0032133;GO:0032212;GO:0032467;GO:0032467;GO:0034501;GO:0034644;GO:0036089;GO:0043687;GO:0043988;GO:…	K11479	aurora kinase B [Source:HGNC Symbol;Acc:HGNC:11390]	sp|Q7YRC6|AURKB_BOVIN Aurora kinase B OS=Bos taurus OX=9913 GN=AURKB PE=2 SV=1	veNOG10148	D	GO:0000122//negative regulation of transcription by RNA polymerase II;GO:0002903//negative regulation of B cell apoptotic process;GO:0006468//protein phosphorylation;GO:0006468//protein phosphorylation;GO:0007051//spindle organization;GO:0007094//mitotic spindle assembly checkpoint signaling;GO:0032091//negative regulation of protein binding;GO:0032212//positive regulation of telomere maintenance…	GO:0000775//chromosome, centromeric region;GO:0000776//kinetochore;GO:0000779//condensed chromosome, centromeric region;GO:0000779//condensed chromosome, centromeric region;GO:0005634//nucleus;GO:0005634//nucleus;GO:0005654//nucleoplasm;GO:0005694//chromosome;GO:0010369//chromocenter;GO:0015630//microtubule cytoskeleton;GO:0030496//midbody;GO:0030496//midbody;GO:0032133//chromosome passenger comp…	GO:0004672//protein kinase activity;GO:0004674//protein serine/threonine kinase activity;GO:0004674//protein serine/threonine kinase activity;GO:0004674//protein serine/threonine kinase activity;GO:0005524//ATP binding;GO:0019900//kinase binding;GO:0044022//histone kinase activity (H3-S28 specific);GO:0004672//protein kinase activity;GO:0004674//protein serine/threonine kinase activity;GO:0005524…	-
MSTRG.100498	ENSBGRG00000026723	MSTRG.100498.1	0	19[+]40119617-40120550	19[+]40109042-40135834	CTC1	GO:0000723;GO:0000781;GO:0003697;GO:0003697;GO:0005634;GO:0005654;GO:0005829;GO:0006974;GO:0007568;GO:0010389;GO:0010833;GO:0032211;GO:0035264;GO:0042162;GO:0045740;GO:0048146;GO:0048536;GO:0048538;GO:0048539;GO:0051276;GO:0071425;GO:0090399;GO:0098505;GO:1990879;GO:1990879;	K23311	CST telomere replication complex component 1 [Source:HGNC Symbol;Acc:HGNC:26169]	sp|Q2NKJ3|CTC1_HUMAN CST complex subunit CTC1 OS=Homo sapiens OX=9606 GN=CTC1 PE=1 SV=2	veNOG09495	S	GO:0000723//telomere maintenance;GO:0006974//cellular response to DNA damage stimulus;GO:0007568//aging;GO:0010389//regulation of G2/M transition of mitotic cell cycle;GO:0010833//telomere maintenance via telomere lengthening;GO:0032211//negative regulation of telomere maintenance via telomerase;GO:0035264//multicellular organism growth;GO:0045740//positive regulation of DNA replication;GO:004814…	GO:0000781//chromosome, telomeric region;GO:0005634//nucleus;GO:0005654//nucleoplasm;GO:0005829//cytosol;GO:1990879//CST complex;GO:1990879//CST complex;	GO:0003697//single-stranded DNA binding;GO:0003697//single-stranded DNA binding;GO:0042162//telomeric DNA binding;GO:0098505//G-rich strand telomeric DNA binding;	-
MSTRG.100498	ENSBGRG00000026702	MSTRG.100498.1	93925	19[+]40119617-40120550	19[-]40020364-40025692	-	-	K25637	-	sp|Q2M2E3|ODFP4_HUMAN Outer dense fiber protein 4 OS=Homo sapiens OX=9606 GN=ODF4 PE=1 SV=2	veNOG12743	S	-	-	-	-
MSTRG.100498	ENSBGRG00000026732	MSTRG.100498.1	58257	19[+]40119617-40120550	19[+]40178807-40179621	-	-	-	-	sp|Q6NZB0|DNJC8_MOUSE DnaJ homolog subfamily C member 8 OS=Mus musculus OX=10090 GN=Dnajc8 PE=1 SV=2	veNOG07961	O	-	-	-	-
MSTRG.100498	ENSBGRG00000026717	MSTRG.100498.1	16958	19[+]40119617-40120550	19[-]40084980-40102659	PFAS	GO:0004642;GO:0004642;GO:0006177;GO:0006189;GO:0006189;GO:0044208;GO:0097065;GO:0097294;GO:0004642;GO:0006189;GO:0004642;GO:0006189;	K01952	phosphoribosylformylglycinamidine synthase [Source:HGNC Symbol;Acc:HGNC:8863]	sp|O15067|PUR4_HUMAN Phosphoribosylformylglycinamidine synthase OS=Homo sapiens OX=9606 GN=PFAS PE=1 SV=4	veNOG00490	F	GO:0006177//GMP biosynthetic process;GO:0006189//'de novo' IMP biosynthetic process;GO:0006189//'de novo' IMP biosynthetic process;GO:0044208//'de novo' AMP biosynthetic process;GO:0097065//anterior head development;GO:0097294//'de novo' XMP biosynthetic process;GO:0006189//'de novo' IMP biosynthetic process;GO:0006189//'de novo' IMP biosynthetic process;	-	GO:0004642//phosphoribosylformylglycinamidine synthase activity;GO:0004642//phosphoribosylformylglycinamidine synthase activity;GO:0004642//phosphoribosylformylglycinamidine synthase activity;GO:0004642//phosphoribosylformylglycinamidine synthase activity;	ko00230(Purine metabolism)
MSTRG.100498	ENSBGRG00000026712	MSTRG.100498.1	45053	19[+]40119617-40120550	19[+]40070403-40074564	SLC25A35	-	K15117	solute carrier family 25 member 35 [Source:HGNC Symbol;Acc:HGNC:31921]	sp|Q5SWT3|S2535_MOUSE Solute carrier family 25 member 35 OS=Mus musculus OX=10090 GN=Slc25a35 PE=1 SV=2	veNOG15562	C	-	-	-	-
MSTRG.100498	ENSBGRG00000026729	MSTRG.100498.1	37000	19[+]40119617-40120550	19[+]40157550-40158611	BORCS6	GO:0032418;GO:0042802;GO:0099078;	K20820	BLOC-1 related complex subunit 6 [Source:HGNC Symbol;Acc:HGNC:25939]	sp|Q3SX20|BORC6_BOVIN BLOC-1-related complex subunit 6 OS=Bos taurus OX=9913 GN=BORCS6 PE=2 SV=2	veNOG15253	S	GO:0032418//lysosome localization;	GO:0099078//BORC complex;	GO:0042802//identical protein binding;	-
MSTRG.100498	ENSBGRG00000026714	MSTRG.100498.1	43343	19[+]40119617-40120550	19[-]40074954-40076274	RANGRF	GO:0003254;GO:0005085;GO:0005634;GO:0005654;GO:0005654;GO:0005737;GO:0005791;GO:0005829;GO:0005901;GO:0006888;GO:0014704;GO:0017080;GO:0031267;GO:0031267;GO:0032527;GO:0042391;GO:0044325;GO:0090226;GO:0098905;GO:0098909;GO:1900825;GO:1902305;GO:1903078;GO:2000010;GO:2000649;	-	RAN guanine nucleotide release factor [Source:HGNC Symbol;Acc:HGNC:17679]	sp|Q32PE2|MOG1_BOVIN Ran guanine nucleotide release factor OS=Bos taurus OX=9913 GN=RANGRF PE=2 SV=1	veNOG00820	T	GO:0003254//regulation of membrane depolarization;GO:0006888//endoplasmic reticulum to Golgi vesicle-mediated transport;GO:0032527//protein exit from endoplasmic reticulum;GO:0042391//regulation of membrane potential;GO:0090226//regulation of microtubule nucleation by Ran protein signal transduction;GO:0098905//regulation of bundle of His cell action potential;GO:0098909//regulation of cardiac mu…	GO:0005634//nucleus;GO:0005654//nucleoplasm;GO:0005654//nucleoplasm;GO:0005737//cytoplasm;GO:0005791//rough endoplasmic reticulum;GO:0005829//cytosol;GO:0005901//caveola;GO:0014704//intercalated disc;	GO:0005085//guanyl-nucleotide exchange factor activity;GO:0017080//sodium channel regulator activity;GO:0031267//small GTPase binding;GO:0031267//small GTPase binding;GO:0044325//transmembrane transporter binding;	-
MSTRG.100498	ENSBGRG00000026734	MSTRG.100498.1	72031	19[+]40119617-40120550	19[+]40192581-40196887	VAMP2	GO:0016021;GO:0016192;GO:0006906;GO:0016020;GO:0016021;GO:0016192;GO:0019905;GO:0030136;GO:0031201;GO:0031982;GO:0043308;	K13504	vesicle associated membrane protein 2 [Source:HGNC Symbol;Acc:HGNC:12643]	sp|P63026|VAMP2_BOVIN Vesicle-associated membrane protein 2 OS=Bos taurus OX=9913 GN=VAMP2 PE=1 SV=2	veNOG23198	U	GO:0016192//vesicle-mediated transport;GO:0006906//vesicle fusion;GO:0016192//vesicle-mediated transport;GO:0043308//eosinophil degranulation;	GO:0016021//integral component of membrane;GO:0016020//membrane;GO:0016021//integral component of membrane;GO:0030136//clathrin-coated vesicle;GO:0031201//SNARE complex;GO:0031982//vesicle;	GO:0019905//syntaxin binding;	ko04970(Salivary secretion);ko04962(Vasopressin-regulated water reabsorption);ko04911(Insulin secretion);ko04721(Synaptic vesicle cycle);ko04130(SNARE interactions in vesicular transport)
MSTRG.100498	ENSBGRG00000026704	MSTRG.100498.1	68641	19[+]40119617-40120550	19[-]40040845-40050976	ARHGEF15	GO:0005085;GO:0005085;GO:0030425;GO:0050790;GO:0061299;GO:2000297;	K20687	Rho guanine nucleotide exchange factor 15 [Source:HGNC Symbol;Acc:HGNC:15590]	sp|O94989|ARHGF_HUMAN Rho guanine nucleotide exchange factor 15 OS=Homo sapiens OX=9606 GN=ARHGEF15 PE=1 SV=4	veNOG03810	T	GO:0050790//regulation of catalytic activity;GO:0061299//retina vasculature morphogenesis in camera-type eye;GO:2000297//negative regulation of synapse maturation;	GO:0030425//dendrite;	GO:0005085//guanyl-nucleotide exchange factor activity;GO:0005085//guanyl-nucleotide exchange factor activity;	-
MSTRG.100498	ENSBGRG00000026730	MSTRG.100498.1	46851	19[+]40119617-40120550	19[+]40167401-40169246	TMEM107	GO:0003127;GO:0007368;GO:0010468;GO:0021532;GO:0035869;GO:0035869;GO:0036038;GO:0042733;GO:0044782;GO:0060021;GO:0060271;GO:0097094;GO:1904491;GO:1905515;	K22764	transmembrane protein 107 [Source:HGNC Symbol;Acc:HGNC:28128]	sp|Q6UX40|TM107_HUMAN Transmembrane protein 107 OS=Homo sapiens OX=9606 GN=TMEM107 PE=1 SV=1	veNOG19453	S	GO:0003127//detection of nodal flow;GO:0007368//determination of left/right symmetry;GO:0010468//regulation of gene expression;GO:0021532//neural tube patterning;GO:0042733//embryonic digit morphogenesis;GO:0044782//cilium organization;GO:0060021//roof of mouth development;GO:0060271//cilium assembly;GO:0097094//craniofacial suture morphogenesis;GO:1904491//protein localization to ciliary transit…	GO:0035869//ciliary transition zone;GO:0035869//ciliary transition zone;GO:0036038//MKS complex;	-	-
MSTRG.100498	ENSBGRG00000026728	MSTRG.100498.1	36255	19[+]40119617-40120550	19[-]40156805-40158090	-	-	-	-	-	-	-	-	-	-	-
MSTRG.100498	ENSBGRG00000026736	MSTRG.100498.1	86421	19[+]40119617-40120550	19[+]40206971-40217126	PER1	GO:0000122;GO:0000976;GO:0000978;GO:0002028;GO:0005515;GO:0005634;GO:0005654;GO:0005737;GO:0005829;GO:0007623;GO:0007623;GO:0009416;GO:0010608;GO:0019900;GO:0031490;GO:0031625;GO:0032922;GO:0032922;GO:0042634;GO:0042752;GO:0043153;GO:0043966;GO:0043967;GO:0045892;GO:0045944;GO:0051591;GO:0070888;GO:0070932;GO:0097167;GO:0140297;GO:2000323;	K21944	period circadian regulator 1 [Source:HGNC Symbol;Acc:HGNC:8845]	sp|Q8CHI5|PER1_RAT Period circadian protein homolog 1 OS=Rattus norvegicus OX=10116 GN=Per1 PE=1 SV=2	veNOG03468	T	GO:0000122//negative regulation of transcription by RNA polymerase II;GO:0002028//regulation of sodium ion transport;GO:0007623//circadian rhythm;GO:0007623//circadian rhythm;GO:0009416//response to light stimulus;GO:0010608//posttranscriptional regulation of gene expression;GO:0032922//circadian regulation of gene expression;GO:0032922//circadian regulation of gene expression;GO:0042634//regulat…	GO:0005634//nucleus;GO:0005654//nucleoplasm;GO:0005737//cytoplasm;GO:0005829//cytosol;	GO:0000976//transcription cis-regulatory region binding;GO:0000978//RNA polymerase II cis-regulatory region sequence-specific DNA binding;GO:0005515//protein binding;GO:0019900//kinase binding;GO:0031490//chromatin DNA binding;GO:0031625//ubiquitin protein ligase binding;GO:0070888//E-box binding;GO:0140297//DNA-binding transcription factor binding;	ko04713(Circadian entrainment);ko04710(Circadian rhythm)
MSTRG.100498	ENSBGRG00000026727	MSTRG.100498.1	28977	19[+]40119617-40120550	19[+]40149527-40153755	AURKB	GO:0000122;GO:0000775;GO:0000776;GO:0000779;GO:0000779;GO:0002903;GO:0004672;GO:0004674;GO:0004674;GO:0004674;GO:0005524;GO:0005634;GO:0005634;GO:0005654;GO:0005694;GO:0006468;GO:0006468;GO:0007051;GO:0007094;GO:0010369;GO:0015630;GO:0019900;GO:0030496;GO:0030496;GO:0032091;GO:0032133;GO:0032133;GO:0032133;GO:0032212;GO:0032467;GO:0032467;GO:0034501;GO:0034644;GO:0036089;GO:0043687;GO:0043988;GO:…	K11479	aurora kinase B [Source:HGNC Symbol;Acc:HGNC:11390]	sp|Q7YRC6|AURKB_BOVIN Aurora kinase B OS=Bos taurus OX=9913 GN=AURKB PE=2 SV=1	veNOG10148	D	GO:0000122//negative regulation of transcription by RNA polymerase II;GO:0002903//negative regulation of B cell apoptotic process;GO:0006468//protein phosphorylation;GO:0006468//protein phosphorylation;GO:0007051//spindle organization;GO:0007094//mitotic spindle assembly checkpoint signaling;GO:0032091//negative regulation of protein binding;GO:0032212//positive regulation of telomere maintenance…	GO:0000775//chromosome, centromeric region;GO:0000776//kinetochore;GO:0000779//condensed chromosome, centromeric region;GO:0000779//condensed chromosome, centromeric region;GO:0005634//nucleus;GO:0005634//nucleus;GO:0005654//nucleoplasm;GO:0005694//chromosome;GO:0010369//chromocenter;GO:0015630//microtubule cytoskeleton;GO:0030496//midbody;GO:0030496//midbody;GO:0032133//chromosome passenger comp…	GO:0004672//protein kinase activity;GO:0004674//protein serine/threonine kinase activity;GO:0004674//protein serine/threonine kinase activity;GO:0004674//protein serine/threonine kinase activity;GO:0005524//ATP binding;GO:0019900//kinase binding;GO:0044022//histone kinase activity (H3-S28 specific);GO:0004672//protein kinase activity;GO:0004674//protein serine/threonine kinase activity;GO:0005524…	-
MSTRG.1005	ENSBGRG00000000037	MSTRG.1005.1	23633	1[-]17974145-17974446	1[+]17998079-18071143	CXADR	GO:0005178;GO:0005654;GO:0005737;GO:0005886;GO:0005911;GO:0005912;GO:0005923;GO:0007157;GO:0008013;GO:0010669;GO:0016323;GO:0016327;GO:0030054;GO:0030165;GO:0030593;GO:0031532;GO:0032991;GO:0045121;GO:0050839;GO:0070633;	K06788	CXADR Ig-like cell adhesion molecule [Source:HGNC Symbol;Acc:HGNC:2559]	sp|Q8WMV3|CXAR_BOVIN Coxsackievirus and adenovirus receptor homolog OS=Bos taurus OX=9913 GN=CXADR PE=2 SV=1	veNOG08870	T	GO:0007157//heterophilic cell-cell adhesion via plasma membrane cell adhesion molecules;GO:0010669//epithelial structure maintenance;GO:0030593//neutrophil chemotaxis;GO:0031532//actin cytoskeleton reorganization;GO:0070633//transepithelial transport;	GO:0005654//nucleoplasm;GO:0005737//cytoplasm;GO:0005886//plasma membrane;GO:0005911//cell-cell junction;GO:0005912//adherens junction;GO:0005923//bicellular tight junction;GO:0016323//basolateral plasma membrane;GO:0016327//apicolateral plasma membrane;GO:0030054//cell junction;GO:0032991//protein-containing complex;GO:0045121//membrane raft;	GO:0005178//integrin binding;GO:0008013//beta-catenin binding;GO:0030165//PDZ domain binding;GO:0050839//cell adhesion molecule binding;	ko05416(Viral myocarditis)
MSTRG.1005	ENSBGRG00000000038	MSTRG.1005.1	97314	1[-]17974145-17974446	1[-]18071760-18087210	BTG3	GO:0005737;GO:0045930;	K14443	BTG anti-proliferation factor 3 [Source:HGNC Symbol;Acc:HGNC:1132]	sp|A4UTQ2|BTG3_PIG Protein BTG3 OS=Sus scrofa OX=9823 GN=BTG3 PE=2 SV=1	veNOG05648	T	GO:0045930//negative regulation of mitotic cell cycle;	GO:0005737//cytoplasm;	-	ko03018(RNA degradation)
MSTRG.100507	ENSBGRG00000026738	MSTRG.100507.1	70478	19[-]40159511-40161044	19[+]40231522-40235477	HES7	GO:0000122;GO:0000122;GO:0000977;GO:0001501;GO:0001756;GO:0003677;GO:0005634;GO:0006355;GO:0007219;GO:0007219;GO:0036342;GO:0045892;GO:0046983;GO:0048511;GO:1990837;	K09087	hes family bHLH transcription factor 7 [Source:HGNC Symbol;Acc:HGNC:15977]	sp|Q9BYE0|HES7_HUMAN Transcription factor HES-7 OS=Homo sapiens OX=9606 GN=HES7 PE=1 SV=2	veNOG16319	K	GO:0000122//negative regulation of transcription by RNA polymerase II;GO:0000122//negative regulation of transcription by RNA polymerase II;GO:0001501//skeletal system development;GO:0001756//somitogenesis;GO:0006355//regulation of transcription, DNA-templated;GO:0007219//Notch signaling pathway;GO:0007219//Notch signaling pathway;GO:0036342//post-anal tail morphogenesis;GO:0045892//negative regu…	GO:0005634//nucleus;	GO:0000977//RNA polymerase II transcription regulatory region sequence-specific DNA binding;GO:0003677//DNA binding;GO:0046983//protein dimerization activity;GO:1990837//sequence-specific double-stranded DNA binding;	ko05165(Human papillomavirus infection)
MSTRG.100507	ENSBGRG00000026723	MSTRG.100507.1	23677	19[-]40159511-40161044	19[+]40109042-40135834	CTC1	GO:0000723;GO:0000781;GO:0003697;GO:0003697;GO:0005634;GO:0005654;GO:0005829;GO:0006974;GO:0007568;GO:0010389;GO:0010833;GO:0032211;GO:0035264;GO:0042162;GO:0045740;GO:0048146;GO:0048536;GO:0048538;GO:0048539;GO:0051276;GO:0071425;GO:0090399;GO:0098505;GO:1990879;GO:1990879;	K23311	CST telomere replication complex component 1 [Source:HGNC Symbol;Acc:HGNC:26169]	sp|Q2NKJ3|CTC1_HUMAN CST complex subunit CTC1 OS=Homo sapiens OX=9606 GN=CTC1 PE=1 SV=2	veNOG09495	S	GO:0000723//telomere maintenance;GO:0006974//cellular response to DNA damage stimulus;GO:0007568//aging;GO:0010389//regulation of G2/M transition of mitotic cell cycle;GO:0010833//telomere maintenance via telomere lengthening;GO:0032211//negative regulation of telomere maintenance via telomerase;GO:0035264//multicellular organism growth;GO:0045740//positive regulation of DNA replication;GO:004814…	GO:0000781//chromosome, telomeric region;GO:0005634//nucleus;GO:0005654//nucleoplasm;GO:0005829//cytosol;GO:1990879//CST complex;GO:1990879//CST complex;	GO:0003697//single-stranded DNA binding;GO:0003697//single-stranded DNA binding;GO:0042162//telomeric DNA binding;GO:0098505//G-rich strand telomeric DNA binding;	-
MSTRG.100507	ENSBGRG00000026732	MSTRG.100507.1	17763	19[-]40159511-40161044	19[+]40178807-40179621	-	-	-	-	sp|Q6NZB0|DNJC8_MOUSE DnaJ homolog subfamily C member 8 OS=Mus musculus OX=10090 GN=Dnajc8 PE=1 SV=2	veNOG07961	O	-	-	-	-
MSTRG.100507	ENSBGRG00000026717	MSTRG.100507.1	56852	19[-]40159511-40161044	19[-]40084980-40102659	PFAS	GO:0004642;GO:0004642;GO:0006177;GO:0006189;GO:0006189;GO:0044208;GO:0097065;GO:0097294;GO:0004642;GO:0006189;GO:0004642;GO:0006189;	K01952	phosphoribosylformylglycinamidine synthase [Source:HGNC Symbol;Acc:HGNC:8863]	sp|O15067|PUR4_HUMAN Phosphoribosylformylglycinamidine synthase OS=Homo sapiens OX=9606 GN=PFAS PE=1 SV=4	veNOG00490	F	GO:0006177//GMP biosynthetic process;GO:0006189//'de novo' IMP biosynthetic process;GO:0006189//'de novo' IMP biosynthetic process;GO:0044208//'de novo' AMP biosynthetic process;GO:0097065//anterior head development;GO:0097294//'de novo' XMP biosynthetic process;GO:0006189//'de novo' IMP biosynthetic process;GO:0006189//'de novo' IMP biosynthetic process;	-	GO:0004642//phosphoribosylformylglycinamidine synthase activity;GO:0004642//phosphoribosylformylglycinamidine synthase activity;GO:0004642//phosphoribosylformylglycinamidine synthase activity;GO:0004642//phosphoribosylformylglycinamidine synthase activity;	ko00230(Purine metabolism)
MSTRG.100507	ENSBGRG00000026712	MSTRG.100507.1	84947	19[-]40159511-40161044	19[+]40070403-40074564	SLC25A35	-	K15117	solute carrier family 25 member 35 [Source:HGNC Symbol;Acc:HGNC:31921]	sp|Q5SWT3|S2535_MOUSE Solute carrier family 25 member 35 OS=Mus musculus OX=10090 GN=Slc25a35 PE=1 SV=2	veNOG15562	C	-	-	-	-
MSTRG.100507	ENSBGRG00000026729	MSTRG.100507.1	900	19[-]40159511-40161044	19[+]40157550-40158611	BORCS6	GO:0032418;GO:0042802;GO:0099078;	K20820	BLOC-1 related complex subunit 6 [Source:HGNC Symbol;Acc:HGNC:25939]	sp|Q3SX20|BORC6_BOVIN BLOC-1-related complex subunit 6 OS=Bos taurus OX=9913 GN=BORCS6 PE=2 SV=2	veNOG15253	S	GO:0032418//lysosome localization;	GO:0099078//BORC complex;	GO:0042802//identical protein binding;	-
MSTRG.100507	ENSBGRG00000026714	MSTRG.100507.1	83237	19[-]40159511-40161044	19[-]40074954-40076274	RANGRF	GO:0003254;GO:0005085;GO:0005634;GO:0005654;GO:0005654;GO:0005737;GO:0005791;GO:0005829;GO:0005901;GO:0006888;GO:0014704;GO:0017080;GO:0031267;GO:0031267;GO:0032527;GO:0042391;GO:0044325;GO:0090226;GO:0098905;GO:0098909;GO:1900825;GO:1902305;GO:1903078;GO:2000010;GO:2000649;	-	RAN guanine nucleotide release factor [Source:HGNC Symbol;Acc:HGNC:17679]	sp|Q32PE2|MOG1_BOVIN Ran guanine nucleotide release factor OS=Bos taurus OX=9913 GN=RANGRF PE=2 SV=1	veNOG00820	T	GO:0003254//regulation of membrane depolarization;GO:0006888//endoplasmic reticulum to Golgi vesicle-mediated transport;GO:0032527//protein exit from endoplasmic reticulum;GO:0042391//regulation of membrane potential;GO:0090226//regulation of microtubule nucleation by Ran protein signal transduction;GO:0098905//regulation of bundle of His cell action potential;GO:0098909//regulation of cardiac mu…	GO:0005634//nucleus;GO:0005654//nucleoplasm;GO:0005654//nucleoplasm;GO:0005737//cytoplasm;GO:0005791//rough endoplasmic reticulum;GO:0005829//cytosol;GO:0005901//caveola;GO:0014704//intercalated disc;	GO:0005085//guanyl-nucleotide exchange factor activity;GO:0017080//sodium channel regulator activity;GO:0031267//small GTPase binding;GO:0031267//small GTPase binding;GO:0044325//transmembrane transporter binding;	-
MSTRG.100507	ENSBGRG00000026734	MSTRG.100507.1	31537	19[-]40159511-40161044	19[+]40192581-40196887	VAMP2	GO:0016021;GO:0016192;GO:0006906;GO:0016020;GO:0016021;GO:0016192;GO:0019905;GO:0030136;GO:0031201;GO:0031982;GO:0043308;	K13504	vesicle associated membrane protein 2 [Source:HGNC Symbol;Acc:HGNC:12643]	sp|P63026|VAMP2_BOVIN Vesicle-associated membrane protein 2 OS=Bos taurus OX=9913 GN=VAMP2 PE=1 SV=2	veNOG23198	U	GO:0016192//vesicle-mediated transport;GO:0006906//vesicle fusion;GO:0016192//vesicle-mediated transport;GO:0043308//eosinophil degranulation;	GO:0016021//integral component of membrane;GO:0016020//membrane;GO:0016021//integral component of membrane;GO:0030136//clathrin-coated vesicle;GO:0031201//SNARE complex;GO:0031982//vesicle;	GO:0019905//syntaxin binding;	ko04970(Salivary secretion);ko04962(Vasopressin-regulated water reabsorption);ko04911(Insulin secretion);ko04721(Synaptic vesicle cycle);ko04130(SNARE interactions in vesicular transport)
MSTRG.100507	ENSBGRG00000026739	MSTRG.100507.1	77696	19[-]40159511-40161044	19[+]40238740-40261598	ALOXE3	GO:0005506;GO:0005515;GO:0006665;GO:0016702;GO:0016702;GO:0019369;GO:0019372;GO:0035357;GO:0043651;GO:0045444;GO:0046513;GO:0046872;GO:0050486;GO:0051120;GO:0051122;GO:0061436;	K18684	arachidonate lipoxygenase 3 [Source:HGNC Symbol;Acc:HGNC:13743]	sp|Q9BYJ1|LOXE3_HUMAN Hydroperoxide isomerase ALOXE3 OS=Homo sapiens OX=9606 GN=ALOXE3 PE=1 SV=1	veNOG04455	R	GO:0006665//sphingolipid metabolic process;GO:0019369//arachidonic acid metabolic process;GO:0019372//lipoxygenase pathway;GO:0035357//peroxisome proliferator activated receptor signaling pathway;GO:0043651//linoleic acid metabolic process;GO:0045444//fat cell differentiation;GO:0046513//ceramide biosynthetic process;GO:0051122//hepoxilin biosynthetic process;GO:0061436//establishment of skin bar…	-	GO:0005506//iron ion binding;GO:0005515//protein binding;GO:0016702//oxidoreductase activity, acting on single donors with incorporation of molecular oxygen, incorporation of two atoms of oxygen;GO:0016702//oxidoreductase activity, acting on single donors with incorporation of molecular oxygen, incorporation of two atoms of oxygen;GO:0046872//metal ion binding;GO:0050486//intramolecular transfera…	-
MSTRG.100507	ENSBGRG00000026730	MSTRG.100507.1	6357	19[-]40159511-40161044	19[+]40167401-40169246	TMEM107	GO:0003127;GO:0007368;GO:0010468;GO:0021532;GO:0035869;GO:0035869;GO:0036038;GO:0042733;GO:0044782;GO:0060021;GO:0060271;GO:0097094;GO:1904491;GO:1905515;	K22764	transmembrane protein 107 [Source:HGNC Symbol;Acc:HGNC:28128]	sp|Q6UX40|TM107_HUMAN Transmembrane protein 107 OS=Homo sapiens OX=9606 GN=TMEM107 PE=1 SV=1	veNOG19453	S	GO:0003127//detection of nodal flow;GO:0007368//determination of left/right symmetry;GO:0010468//regulation of gene expression;GO:0021532//neural tube patterning;GO:0042733//embryonic digit morphogenesis;GO:0044782//cilium organization;GO:0060021//roof of mouth development;GO:0060271//cilium assembly;GO:0097094//craniofacial suture morphogenesis;GO:1904491//protein localization to ciliary transit…	GO:0035869//ciliary transition zone;GO:0035869//ciliary transition zone;GO:0036038//MKS complex;	-	-
MSTRG.100507	ENSBGRG00000026728	MSTRG.100507.1	1421	19[-]40159511-40161044	19[-]40156805-40158090	-	-	-	-	-	-	-	-	-	-	-
MSTRG.100507	ENSBGRG00000026736	MSTRG.100507.1	45927	19[-]40159511-40161044	19[+]40206971-40217126	PER1	GO:0000122;GO:0000976;GO:0000978;GO:0002028;GO:0005515;GO:0005634;GO:0005654;GO:0005737;GO:0005829;GO:0007623;GO:0007623;GO:0009416;GO:0010608;GO:0019900;GO:0031490;GO:0031625;GO:0032922;GO:0032922;GO:0042634;GO:0042752;GO:0043153;GO:0043966;GO:0043967;GO:0045892;GO:0045944;GO:0051591;GO:0070888;GO:0070932;GO:0097167;GO:0140297;GO:2000323;	K21944	period circadian regulator 1 [Source:HGNC Symbol;Acc:HGNC:8845]	sp|Q8CHI5|PER1_RAT Period circadian protein homolog 1 OS=Rattus norvegicus OX=10116 GN=Per1 PE=1 SV=2	veNOG03468	T	GO:0000122//negative regulation of transcription by RNA polymerase II;GO:0002028//regulation of sodium ion transport;GO:0007623//circadian rhythm;GO:0007623//circadian rhythm;GO:0009416//response to light stimulus;GO:0010608//posttranscriptional regulation of gene expression;GO:0032922//circadian regulation of gene expression;GO:0032922//circadian regulation of gene expression;GO:0042634//regulat…	GO:0005634//nucleus;GO:0005654//nucleoplasm;GO:0005737//cytoplasm;GO:0005829//cytosol;	GO:0000976//transcription cis-regulatory region binding;GO:0000978//RNA polymerase II cis-regulatory region sequence-specific DNA binding;GO:0005515//protein binding;GO:0019900//kinase binding;GO:0031490//chromatin DNA binding;GO:0031625//ubiquitin protein ligase binding;GO:0070888//E-box binding;GO:0140297//DNA-binding transcription factor binding;	ko04713(Circadian entrainment);ko04710(Circadian rhythm)
MSTRG.100507	ENSBGRG00000026727	MSTRG.100507.1	5756	19[-]40159511-40161044	19[+]40149527-40153755	AURKB	GO:0000122;GO:0000775;GO:0000776;GO:0000779;GO:0000779;GO:0002903;GO:0004672;GO:0004674;GO:0004674;GO:0004674;GO:0005524;GO:0005634;GO:0005634;GO:0005654;GO:0005694;GO:0006468;GO:0006468;GO:0007051;GO:0007094;GO:0010369;GO:0015630;GO:0019900;GO:0030496;GO:0030496;GO:0032091;GO:0032133;GO:0032133;GO:0032133;GO:0032212;GO:0032467;GO:0032467;GO:0034501;GO:0034644;GO:0036089;GO:0043687;GO:0043988;GO:…	K11479	aurora kinase B [Source:HGNC Symbol;Acc:HGNC:11390]	sp|Q7YRC6|AURKB_BOVIN Aurora kinase B OS=Bos taurus OX=9913 GN=AURKB PE=2 SV=1	veNOG10148	D	GO:0000122//negative regulation of transcription by RNA polymerase II;GO:0002903//negative regulation of B cell apoptotic process;GO:0006468//protein phosphorylation;GO:0006468//protein phosphorylation;GO:0007051//spindle organization;GO:0007094//mitotic spindle assembly checkpoint signaling;GO:0032091//negative regulation of protein binding;GO:0032212//positive regulation of telomere maintenance…	GO:0000775//chromosome, centromeric region;GO:0000776//kinetochore;GO:0000779//condensed chromosome, centromeric region;GO:0000779//condensed chromosome, centromeric region;GO:0005634//nucleus;GO:0005634//nucleus;GO:0005654//nucleoplasm;GO:0005694//chromosome;GO:0010369//chromocenter;GO:0015630//microtubule cytoskeleton;GO:0030496//midbody;GO:0030496//midbody;GO:0032133//chromosome passenger comp…	GO:0004672//protein kinase activity;GO:0004674//protein serine/threonine kinase activity;GO:0004674//protein serine/threonine kinase activity;GO:0004674//protein serine/threonine kinase activity;GO:0005524//ATP binding;GO:0019900//kinase binding;GO:0044022//histone kinase activity (H3-S28 specific);GO:0004672//protein kinase activity;GO:0004674//protein serine/threonine kinase activity;GO:0005524…	-
MSTRG.100510	ENSBGRG00000026738	MSTRG.100510.1,MSTRG.100510.2	64361	19[-]40166378-40167161	19[+]40231522-40235477	HES7	GO:0000122;GO:0000122;GO:0000977;GO:0001501;GO:0001756;GO:0003677;GO:0005634;GO:0006355;GO:0007219;GO:0007219;GO:0036342;GO:0045892;GO:0046983;GO:0048511;GO:1990837;	K09087	hes family bHLH transcription factor 7 [Source:HGNC Symbol;Acc:HGNC:15977]	sp|Q9BYE0|HES7_HUMAN Transcription factor HES-7 OS=Homo sapiens OX=9606 GN=HES7 PE=1 SV=2	veNOG16319	K	GO:0000122//negative regulation of transcription by RNA polymerase II;GO:0000122//negative regulation of transcription by RNA polymerase II;GO:0001501//skeletal system development;GO:0001756//somitogenesis;GO:0006355//regulation of transcription, DNA-templated;GO:0007219//Notch signaling pathway;GO:0007219//Notch signaling pathway;GO:0036342//post-anal tail morphogenesis;GO:0045892//negative regu…	GO:0005634//nucleus;	GO:0000977//RNA polymerase II transcription regulatory region sequence-specific DNA binding;GO:0003677//DNA binding;GO:0046983//protein dimerization activity;GO:1990837//sequence-specific double-stranded DNA binding;	ko05165(Human papillomavirus infection)
MSTRG.100510	ENSBGRG00000026723	MSTRG.100510.1,MSTRG.100510.2	30544	19[-]40166378-40167161	19[+]40109042-40135834	CTC1	GO:0000723;GO:0000781;GO:0003697;GO:0003697;GO:0005634;GO:0005654;GO:0005829;GO:0006974;GO:0007568;GO:0010389;GO:0010833;GO:0032211;GO:0035264;GO:0042162;GO:0045740;GO:0048146;GO:0048536;GO:0048538;GO:0048539;GO:0051276;GO:0071425;GO:0090399;GO:0098505;GO:1990879;GO:1990879;	K23311	CST telomere replication complex component 1 [Source:HGNC Symbol;Acc:HGNC:26169]	sp|Q2NKJ3|CTC1_HUMAN CST complex subunit CTC1 OS=Homo sapiens OX=9606 GN=CTC1 PE=1 SV=2	veNOG09495	S	GO:0000723//telomere maintenance;GO:0006974//cellular response to DNA damage stimulus;GO:0007568//aging;GO:0010389//regulation of G2/M transition of mitotic cell cycle;GO:0010833//telomere maintenance via telomere lengthening;GO:0032211//negative regulation of telomere maintenance via telomerase;GO:0035264//multicellular organism growth;GO:0045740//positive regulation of DNA replication;GO:004814…	GO:0000781//chromosome, telomeric region;GO:0005634//nucleus;GO:0005654//nucleoplasm;GO:0005829//cytosol;GO:1990879//CST complex;GO:1990879//CST complex;	GO:0003697//single-stranded DNA binding;GO:0003697//single-stranded DNA binding;GO:0042162//telomeric DNA binding;GO:0098505//G-rich strand telomeric DNA binding;	-
MSTRG.100510	ENSBGRG00000026732	MSTRG.100510.1,MSTRG.100510.2	11646	19[-]40166378-40167161	19[+]40178807-40179621	-	-	-	-	sp|Q6NZB0|DNJC8_MOUSE DnaJ homolog subfamily C member 8 OS=Mus musculus OX=10090 GN=Dnajc8 PE=1 SV=2	veNOG07961	O	-	-	-	-
MSTRG.100510	ENSBGRG00000026717	MSTRG.100510.1,MSTRG.100510.2	63719	19[-]40166378-40167161	19[-]40084980-40102659	PFAS	GO:0004642;GO:0004642;GO:0006177;GO:0006189;GO:0006189;GO:0044208;GO:0097065;GO:0097294;GO:0004642;GO:0006189;GO:0004642;GO:0006189;	K01952	phosphoribosylformylglycinamidine synthase [Source:HGNC Symbol;Acc:HGNC:8863]	sp|O15067|PUR4_HUMAN Phosphoribosylformylglycinamidine synthase OS=Homo sapiens OX=9606 GN=PFAS PE=1 SV=4	veNOG00490	F	GO:0006177//GMP biosynthetic process;GO:0006189//'de novo' IMP biosynthetic process;GO:0006189//'de novo' IMP biosynthetic process;GO:0044208//'de novo' AMP biosynthetic process;GO:0097065//anterior head development;GO:0097294//'de novo' XMP biosynthetic process;GO:0006189//'de novo' IMP biosynthetic process;GO:0006189//'de novo' IMP biosynthetic process;	-	GO:0004642//phosphoribosylformylglycinamidine synthase activity;GO:0004642//phosphoribosylformylglycinamidine synthase activity;GO:0004642//phosphoribosylformylglycinamidine synthase activity;GO:0004642//phosphoribosylformylglycinamidine synthase activity;	ko00230(Purine metabolism)
MSTRG.100510	ENSBGRG00000026712	MSTRG.100510.1,MSTRG.100510.2	91814	19[-]40166378-40167161	19[+]40070403-40074564	SLC25A35	-	K15117	solute carrier family 25 member 35 [Source:HGNC Symbol;Acc:HGNC:31921]	sp|Q5SWT3|S2535_MOUSE Solute carrier family 25 member 35 OS=Mus musculus OX=10090 GN=Slc25a35 PE=1 SV=2	veNOG15562	C	-	-	-	-
MSTRG.100510	ENSBGRG00000026729	MSTRG.100510.1,MSTRG.100510.2	7767	19[-]40166378-40167161	19[+]40157550-40158611	BORCS6	GO:0032418;GO:0042802;GO:0099078;	K20820	BLOC-1 related complex subunit 6 [Source:HGNC Symbol;Acc:HGNC:25939]	sp|Q3SX20|BORC6_BOVIN BLOC-1-related complex subunit 6 OS=Bos taurus OX=9913 GN=BORCS6 PE=2 SV=2	veNOG15253	S	GO:0032418//lysosome localization;	GO:0099078//BORC complex;	GO:0042802//identical protein binding;	-
MSTRG.100510	ENSBGRG00000026714	MSTRG.100510.1,MSTRG.100510.2	90104	19[-]40166378-40167161	19[-]40074954-40076274	RANGRF	GO:0003254;GO:0005085;GO:0005634;GO:0005654;GO:0005654;GO:0005737;GO:0005791;GO:0005829;GO:0005901;GO:0006888;GO:0014704;GO:0017080;GO:0031267;GO:0031267;GO:0032527;GO:0042391;GO:0044325;GO:0090226;GO:0098905;GO:0098909;GO:1900825;GO:1902305;GO:1903078;GO:2000010;GO:2000649;	-	RAN guanine nucleotide release factor [Source:HGNC Symbol;Acc:HGNC:17679]	sp|Q32PE2|MOG1_BOVIN Ran guanine nucleotide release factor OS=Bos taurus OX=9913 GN=RANGRF PE=2 SV=1	veNOG00820	T	GO:0003254//regulation of membrane depolarization;GO:0006888//endoplasmic reticulum to Golgi vesicle-mediated transport;GO:0032527//protein exit from endoplasmic reticulum;GO:0042391//regulation of membrane potential;GO:0090226//regulation of microtubule nucleation by Ran protein signal transduction;GO:0098905//regulation of bundle of His cell action potential;GO:0098909//regulation of cardiac mu…	GO:0005634//nucleus;GO:0005654//nucleoplasm;GO:0005654//nucleoplasm;GO:0005737//cytoplasm;GO:0005791//rough endoplasmic reticulum;GO:0005829//cytosol;GO:0005901//caveola;GO:0014704//intercalated disc;	GO:0005085//guanyl-nucleotide exchange factor activity;GO:0017080//sodium channel regulator activity;GO:0031267//small GTPase binding;GO:0031267//small GTPase binding;GO:0044325//transmembrane transporter binding;	-
MSTRG.100510	ENSBGRG00000026734	MSTRG.100510.1,MSTRG.100510.2	25420	19[-]40166378-40167161	19[+]40192581-40196887	VAMP2	GO:0016021;GO:0016192;GO:0006906;GO:0016020;GO:0016021;GO:0016192;GO:0019905;GO:0030136;GO:0031201;GO:0031982;GO:0043308;	K13504	vesicle associated membrane protein 2 [Source:HGNC Symbol;Acc:HGNC:12643]	sp|P63026|VAMP2_BOVIN Vesicle-associated membrane protein 2 OS=Bos taurus OX=9913 GN=VAMP2 PE=1 SV=2	veNOG23198	U	GO:0016192//vesicle-mediated transport;GO:0006906//vesicle fusion;GO:0016192//vesicle-mediated transport;GO:0043308//eosinophil degranulation;	GO:0016021//integral component of membrane;GO:0016020//membrane;GO:0016021//integral component of membrane;GO:0030136//clathrin-coated vesicle;GO:0031201//SNARE complex;GO:0031982//vesicle;	GO:0019905//syntaxin binding;	ko04970(Salivary secretion);ko04962(Vasopressin-regulated water reabsorption);ko04911(Insulin secretion);ko04721(Synaptic vesicle cycle);ko04130(SNARE interactions in vesicular transport)
MSTRG.100510	ENSBGRG00000026739	MSTRG.100510.1,MSTRG.100510.2	71579	19[-]40166378-40167161	19[+]40238740-40261598	ALOXE3	GO:0005506;GO:0005515;GO:0006665;GO:0016702;GO:0016702;GO:0019369;GO:0019372;GO:0035357;GO:0043651;GO:0045444;GO:0046513;GO:0046872;GO:0050486;GO:0051120;GO:0051122;GO:0061436;	K18684	arachidonate lipoxygenase 3 [Source:HGNC Symbol;Acc:HGNC:13743]	sp|Q9BYJ1|LOXE3_HUMAN Hydroperoxide isomerase ALOXE3 OS=Homo sapiens OX=9606 GN=ALOXE3 PE=1 SV=1	veNOG04455	R	GO:0006665//sphingolipid metabolic process;GO:0019369//arachidonic acid metabolic process;GO:0019372//lipoxygenase pathway;GO:0035357//peroxisome proliferator activated receptor signaling pathway;GO:0043651//linoleic acid metabolic process;GO:0045444//fat cell differentiation;GO:0046513//ceramide biosynthetic process;GO:0051122//hepoxilin biosynthetic process;GO:0061436//establishment of skin bar…	-	GO:0005506//iron ion binding;GO:0005515//protein binding;GO:0016702//oxidoreductase activity, acting on single donors with incorporation of molecular oxygen, incorporation of two atoms of oxygen;GO:0016702//oxidoreductase activity, acting on single donors with incorporation of molecular oxygen, incorporation of two atoms of oxygen;GO:0046872//metal ion binding;GO:0050486//intramolecular transfera…	-
MSTRG.100510	ENSBGRG00000026730	MSTRG.100510.1,MSTRG.100510.2	240	19[-]40166378-40167161	19[+]40167401-40169246	TMEM107	GO:0003127;GO:0007368;GO:0010468;GO:0021532;GO:0035869;GO:0035869;GO:0036038;GO:0042733;GO:0044782;GO:0060021;GO:0060271;GO:0097094;GO:1904491;GO:1905515;	K22764	transmembrane protein 107 [Source:HGNC Symbol;Acc:HGNC:28128]	sp|Q6UX40|TM107_HUMAN Transmembrane protein 107 OS=Homo sapiens OX=9606 GN=TMEM107 PE=1 SV=1	veNOG19453	S	GO:0003127//detection of nodal flow;GO:0007368//determination of left/right symmetry;GO:0010468//regulation of gene expression;GO:0021532//neural tube patterning;GO:0042733//embryonic digit morphogenesis;GO:0044782//cilium organization;GO:0060021//roof of mouth development;GO:0060271//cilium assembly;GO:0097094//craniofacial suture morphogenesis;GO:1904491//protein localization to ciliary transit…	GO:0035869//ciliary transition zone;GO:0035869//ciliary transition zone;GO:0036038//MKS complex;	-	-
MSTRG.100510	ENSBGRG00000026728	MSTRG.100510.1,MSTRG.100510.2	8288	19[-]40166378-40167161	19[-]40156805-40158090	-	-	-	-	-	-	-	-	-	-	-
MSTRG.100510	ENSBGRG00000026736	MSTRG.100510.1,MSTRG.100510.2	39810	19[-]40166378-40167161	19[+]40206971-40217126	PER1	GO:0000122;GO:0000976;GO:0000978;GO:0002028;GO:0005515;GO:0005634;GO:0005654;GO:0005737;GO:0005829;GO:0007623;GO:0007623;GO:0009416;GO:0010608;GO:0019900;GO:0031490;GO:0031625;GO:0032922;GO:0032922;GO:0042634;GO:0042752;GO:0043153;GO:0043966;GO:0043967;GO:0045892;GO:0045944;GO:0051591;GO:0070888;GO:0070932;GO:0097167;GO:0140297;GO:2000323;	K21944	period circadian regulator 1 [Source:HGNC Symbol;Acc:HGNC:8845]	sp|Q8CHI5|PER1_RAT Period circadian protein homolog 1 OS=Rattus norvegicus OX=10116 GN=Per1 PE=1 SV=2	veNOG03468	T	GO:0000122//negative regulation of transcription by RNA polymerase II;GO:0002028//regulation of sodium ion transport;GO:0007623//circadian rhythm;GO:0007623//circadian rhythm;GO:0009416//response to light stimulus;GO:0010608//posttranscriptional regulation of gene expression;GO:0032922//circadian regulation of gene expression;GO:0032922//circadian regulation of gene expression;GO:0042634//regulat…	GO:0005634//nucleus;GO:0005654//nucleoplasm;GO:0005737//cytoplasm;GO:0005829//cytosol;	GO:0000976//transcription cis-regulatory region binding;GO:0000978//RNA polymerase II cis-regulatory region sequence-specific DNA binding;GO:0005515//protein binding;GO:0019900//kinase binding;GO:0031490//chromatin DNA binding;GO:0031625//ubiquitin protein ligase binding;GO:0070888//E-box binding;GO:0140297//DNA-binding transcription factor binding;	ko04713(Circadian entrainment);ko04710(Circadian rhythm)
MSTRG.100510	ENSBGRG00000026727	MSTRG.100510.1,MSTRG.100510.2	12623	19[-]40166378-40167161	19[+]40149527-40153755	AURKB	GO:0000122;GO:0000775;GO:0000776;GO:0000779;GO:0000779;GO:0002903;GO:0004672;GO:0004674;GO:0004674;GO:0004674;GO:0005524;GO:0005634;GO:0005634;GO:0005654;GO:0005694;GO:0006468;GO:0006468;GO:0007051;GO:0007094;GO:0010369;GO:0015630;GO:0019900;GO:0030496;GO:0030496;GO:0032091;GO:0032133;GO:0032133;GO:0032133;GO:0032212;GO:0032467;GO:0032467;GO:0034501;GO:0034644;GO:0036089;GO:0043687;GO:0043988;GO:…	K11479	aurora kinase B [Source:HGNC Symbol;Acc:HGNC:11390]	sp|Q7YRC6|AURKB_BOVIN Aurora kinase B OS=Bos taurus OX=9913 GN=AURKB PE=2 SV=1	veNOG10148	D	GO:0000122//negative regulation of transcription by RNA polymerase II;GO:0002903//negative regulation of B cell apoptotic process;GO:0006468//protein phosphorylation;GO:0006468//protein phosphorylation;GO:0007051//spindle organization;GO:0007094//mitotic spindle assembly checkpoint signaling;GO:0032091//negative regulation of protein binding;GO:0032212//positive regulation of telomere maintenance…	GO:0000775//chromosome, centromeric region;GO:0000776//kinetochore;GO:0000779//condensed chromosome, centromeric region;GO:0000779//condensed chromosome, centromeric region;GO:0005634//nucleus;GO:0005634//nucleus;GO:0005654//nucleoplasm;GO:0005694//chromosome;GO:0010369//chromocenter;GO:0015630//microtubule cytoskeleton;GO:0030496//midbody;GO:0030496//midbody;GO:0032133//chromosome passenger comp…	GO:0004672//protein kinase activity;GO:0004674//protein serine/threonine kinase activity;GO:0004674//protein serine/threonine kinase activity;GO:0004674//protein serine/threonine kinase activity;GO:0005524//ATP binding;GO:0019900//kinase binding;GO:0044022//histone kinase activity (H3-S28 specific);GO:0004672//protein kinase activity;GO:0004674//protein serine/threonine kinase activity;GO:0005524…	-
MSTRG.100524	ENSBGRG00000026738	MSTRG.100524.9,MSTRG.100524.8,MSTRG.100524.6,MSTRG.100524.10	32488	19[+]40193659-40199034	19[+]40231522-40235477	HES7	GO:0000122;GO:0000122;GO:0000977;GO:0001501;GO:0001756;GO:0003677;GO:0005634;GO:0006355;GO:0007219;GO:0007219;GO:0036342;GO:0045892;GO:0046983;GO:0048511;GO:1990837;	K09087	hes family bHLH transcription factor 7 [Source:HGNC Symbol;Acc:HGNC:15977]	sp|Q9BYE0|HES7_HUMAN Transcription factor HES-7 OS=Homo sapiens OX=9606 GN=HES7 PE=1 SV=2	veNOG16319	K	GO:0000122//negative regulation of transcription by RNA polymerase II;GO:0000122//negative regulation of transcription by RNA polymerase II;GO:0001501//skeletal system development;GO:0001756//somitogenesis;GO:0006355//regulation of transcription, DNA-templated;GO:0007219//Notch signaling pathway;GO:0007219//Notch signaling pathway;GO:0036342//post-anal tail morphogenesis;GO:0045892//negative regu…	GO:0005634//nucleus;	GO:0000977//RNA polymerase II transcription regulatory region sequence-specific DNA binding;GO:0003677//DNA binding;GO:0046983//protein dimerization activity;GO:1990837//sequence-specific double-stranded DNA binding;	ko05165(Human papillomavirus infection)
MSTRG.100524	ENSBGRG00000026723	MSTRG.100524.9,MSTRG.100524.8,MSTRG.100524.6,MSTRG.100524.10	57825	19[+]40193659-40199034	19[+]40109042-40135834	CTC1	GO:0000723;GO:0000781;GO:0003697;GO:0003697;GO:0005634;GO:0005654;GO:0005829;GO:0006974;GO:0007568;GO:0010389;GO:0010833;GO:0032211;GO:0035264;GO:0042162;GO:0045740;GO:0048146;GO:0048536;GO:0048538;GO:0048539;GO:0051276;GO:0071425;GO:0090399;GO:0098505;GO:1990879;GO:1990879;	K23311	CST telomere replication complex component 1 [Source:HGNC Symbol;Acc:HGNC:26169]	sp|Q2NKJ3|CTC1_HUMAN CST complex subunit CTC1 OS=Homo sapiens OX=9606 GN=CTC1 PE=1 SV=2	veNOG09495	S	GO:0000723//telomere maintenance;GO:0006974//cellular response to DNA damage stimulus;GO:0007568//aging;GO:0010389//regulation of G2/M transition of mitotic cell cycle;GO:0010833//telomere maintenance via telomere lengthening;GO:0032211//negative regulation of telomere maintenance via telomerase;GO:0035264//multicellular organism growth;GO:0045740//positive regulation of DNA replication;GO:004814…	GO:0000781//chromosome, telomeric region;GO:0005634//nucleus;GO:0005654//nucleoplasm;GO:0005829//cytosol;GO:1990879//CST complex;GO:1990879//CST complex;	GO:0003697//single-stranded DNA binding;GO:0003697//single-stranded DNA binding;GO:0042162//telomeric DNA binding;GO:0098505//G-rich strand telomeric DNA binding;	-
MSTRG.100524	ENSBGRG00000026732	MSTRG.100524.9,MSTRG.100524.8,MSTRG.100524.6,MSTRG.100524.10	14038	19[+]40193659-40199034	19[+]40178807-40179621	-	-	-	-	sp|Q6NZB0|DNJC8_MOUSE DnaJ homolog subfamily C member 8 OS=Mus musculus OX=10090 GN=Dnajc8 PE=1 SV=2	veNOG07961	O	-	-	-	-
MSTRG.100524	ENSBGRG00000026717	MSTRG.100524.9,MSTRG.100524.8,MSTRG.100524.6,MSTRG.100524.10	91000	19[+]40193659-40199034	19[-]40084980-40102659	PFAS	GO:0004642;GO:0004642;GO:0006177;GO:0006189;GO:0006189;GO:0044208;GO:0097065;GO:0097294;GO:0004642;GO:0006189;GO:0004642;GO:0006189;	K01952	phosphoribosylformylglycinamidine synthase [Source:HGNC Symbol;Acc:HGNC:8863]	sp|O15067|PUR4_HUMAN Phosphoribosylformylglycinamidine synthase OS=Homo sapiens OX=9606 GN=PFAS PE=1 SV=4	veNOG00490	F	GO:0006177//GMP biosynthetic process;GO:0006189//'de novo' IMP biosynthetic process;GO:0006189//'de novo' IMP biosynthetic process;GO:0044208//'de novo' AMP biosynthetic process;GO:0097065//anterior head development;GO:0097294//'de novo' XMP biosynthetic process;GO:0006189//'de novo' IMP biosynthetic process;GO:0006189//'de novo' IMP biosynthetic process;	-	GO:0004642//phosphoribosylformylglycinamidine synthase activity;GO:0004642//phosphoribosylformylglycinamidine synthase activity;GO:0004642//phosphoribosylformylglycinamidine synthase activity;GO:0004642//phosphoribosylformylglycinamidine synthase activity;	ko00230(Purine metabolism)
MSTRG.100524	ENSBGRG00000026729	MSTRG.100524.9,MSTRG.100524.8,MSTRG.100524.6,MSTRG.100524.10	35048	19[+]40193659-40199034	19[+]40157550-40158611	BORCS6	GO:0032418;GO:0042802;GO:0099078;	K20820	BLOC-1 related complex subunit 6 [Source:HGNC Symbol;Acc:HGNC:25939]	sp|Q3SX20|BORC6_BOVIN BLOC-1-related complex subunit 6 OS=Bos taurus OX=9913 GN=BORCS6 PE=2 SV=2	veNOG15253	S	GO:0032418//lysosome localization;	GO:0099078//BORC complex;	GO:0042802//identical protein binding;	-
MSTRG.100524	ENSBGRG00000026734	MSTRG.100524.9,MSTRG.100524.8,MSTRG.100524.6,MSTRG.100524.10	0	19[+]40193659-40199034	19[+]40192581-40196887	VAMP2	GO:0016021;GO:0016192;GO:0006906;GO:0016020;GO:0016021;GO:0016192;GO:0019905;GO:0030136;GO:0031201;GO:0031982;GO:0043308;	K13504	vesicle associated membrane protein 2 [Source:HGNC Symbol;Acc:HGNC:12643]	sp|P63026|VAMP2_BOVIN Vesicle-associated membrane protein 2 OS=Bos taurus OX=9913 GN=VAMP2 PE=1 SV=2	veNOG23198	U	GO:0016192//vesicle-mediated transport;GO:0006906//vesicle fusion;GO:0016192//vesicle-mediated transport;GO:0043308//eosinophil degranulation;	GO:0016021//integral component of membrane;GO:0016020//membrane;GO:0016021//integral component of membrane;GO:0030136//clathrin-coated vesicle;GO:0031201//SNARE complex;GO:0031982//vesicle;	GO:0019905//syntaxin binding;	ko04970(Salivary secretion);ko04962(Vasopressin-regulated water reabsorption);ko04911(Insulin secretion);ko04721(Synaptic vesicle cycle);ko04130(SNARE interactions in vesicular transport)
MSTRG.100524	ENSBGRG00000026739	MSTRG.100524.9,MSTRG.100524.8,MSTRG.100524.6,MSTRG.100524.10	39706	19[+]40193659-40199034	19[+]40238740-40261598	ALOXE3	GO:0005506;GO:0005515;GO:0006665;GO:0016702;GO:0016702;GO:0019369;GO:0019372;GO:0035357;GO:0043651;GO:0045444;GO:0046513;GO:0046872;GO:0050486;GO:0051120;GO:0051122;GO:0061436;	K18684	arachidonate lipoxygenase 3 [Source:HGNC Symbol;Acc:HGNC:13743]	sp|Q9BYJ1|LOXE3_HUMAN Hydroperoxide isomerase ALOXE3 OS=Homo sapiens OX=9606 GN=ALOXE3 PE=1 SV=1	veNOG04455	R	GO:0006665//sphingolipid metabolic process;GO:0019369//arachidonic acid metabolic process;GO:0019372//lipoxygenase pathway;GO:0035357//peroxisome proliferator activated receptor signaling pathway;GO:0043651//linoleic acid metabolic process;GO:0045444//fat cell differentiation;GO:0046513//ceramide biosynthetic process;GO:0051122//hepoxilin biosynthetic process;GO:0061436//establishment of skin bar…	-	GO:0005506//iron ion binding;GO:0005515//protein binding;GO:0016702//oxidoreductase activity, acting on single donors with incorporation of molecular oxygen, incorporation of two atoms of oxygen;GO:0016702//oxidoreductase activity, acting on single donors with incorporation of molecular oxygen, incorporation of two atoms of oxygen;GO:0046872//metal ion binding;GO:0050486//intramolecular transfera…	-
MSTRG.100524	ENSBGRG00000026741	MSTRG.100524.9,MSTRG.100524.8,MSTRG.100524.6,MSTRG.100524.10	73272	19[+]40193659-40199034	19[+]40272306-40287769	ALOX12B	GO:0003824;GO:0004052;GO:0004052;GO:0005506;GO:0005515;GO:0005829;GO:0006497;GO:0006665;GO:0010628;GO:0016702;GO:0016702;GO:0019369;GO:0019372;GO:0043231;GO:0043410;GO:0043651;GO:0046513;GO:0046872;GO:0047677;GO:0048471;GO:0061436;GO:0070257;GO:1990136;GO:0005506;GO:0005515;GO:0016702;GO:0046872;GO:0005506;GO:0005515;GO:0016702;GO:0046872;	K08021	arachidonate 12-lipoxygenase, 12R type [Source:HGNC Symbol;Acc:HGNC:430]	sp|O75342|LX12B_HUMAN Arachidonate 12-lipoxygenase, 12R-type OS=Homo sapiens OX=9606 GN=ALOX12B PE=1 SV=1	veNOG04455	R	GO:0006497//protein lipidation;GO:0006665//sphingolipid metabolic process;GO:0010628//positive regulation of gene expression;GO:0019369//arachidonic acid metabolic process;GO:0019372//lipoxygenase pathway;GO:0043410//positive regulation of MAPK cascade;GO:0043651//linoleic acid metabolic process;GO:0046513//ceramide biosynthetic process;GO:0061436//establishment of skin barrier;GO:0070257//positi…	GO:0005829//cytosol;GO:0043231//intracellular membrane-bounded organelle;GO:0048471//perinuclear region of cytoplasm;	GO:0003824//catalytic activity;GO:0004052//arachidonate 12(S)-lipoxygenase activity;GO:0004052//arachidonate 12(S)-lipoxygenase activity;GO:0005506//iron ion binding;GO:0005515//protein binding;GO:0016702//oxidoreductase activity, acting on single donors with incorporation of molecular oxygen, incorporation of two atoms of oxygen;GO:0016702//oxidoreductase activity, acting on single donors with i…	ko04726(Serotonergic synapse);ko00590(Arachidonic acid metabolism)
MSTRG.100524	ENSBGRG00000026730	MSTRG.100524.9,MSTRG.100524.8,MSTRG.100524.6,MSTRG.100524.10	24413	19[+]40193659-40199034	19[+]40167401-40169246	TMEM107	GO:0003127;GO:0007368;GO:0010468;GO:0021532;GO:0035869;GO:0035869;GO:0036038;GO:0042733;GO:0044782;GO:0060021;GO:0060271;GO:0097094;GO:1904491;GO:1905515;	K22764	transmembrane protein 107 [Source:HGNC Symbol;Acc:HGNC:28128]	sp|Q6UX40|TM107_HUMAN Transmembrane protein 107 OS=Homo sapiens OX=9606 GN=TMEM107 PE=1 SV=1	veNOG19453	S	GO:0003127//detection of nodal flow;GO:0007368//determination of left/right symmetry;GO:0010468//regulation of gene expression;GO:0021532//neural tube patterning;GO:0042733//embryonic digit morphogenesis;GO:0044782//cilium organization;GO:0060021//roof of mouth development;GO:0060271//cilium assembly;GO:0097094//craniofacial suture morphogenesis;GO:1904491//protein localization to ciliary transit…	GO:0035869//ciliary transition zone;GO:0035869//ciliary transition zone;GO:0036038//MKS complex;	-	-
MSTRG.100524	ENSBGRG00000026728	MSTRG.100524.9,MSTRG.100524.8,MSTRG.100524.6,MSTRG.100524.10	35569	19[+]40193659-40199034	19[-]40156805-40158090	-	-	-	-	-	-	-	-	-	-	-
MSTRG.100524	ENSBGRG00000026736	MSTRG.100524.9,MSTRG.100524.8,MSTRG.100524.6,MSTRG.100524.10	7937	19[+]40193659-40199034	19[+]40206971-40217126	PER1	GO:0000122;GO:0000976;GO:0000978;GO:0002028;GO:0005515;GO:0005634;GO:0005654;GO:0005737;GO:0005829;GO:0007623;GO:0007623;GO:0009416;GO:0010608;GO:0019900;GO:0031490;GO:0031625;GO:0032922;GO:0032922;GO:0042634;GO:0042752;GO:0043153;GO:0043966;GO:0043967;GO:0045892;GO:0045944;GO:0051591;GO:0070888;GO:0070932;GO:0097167;GO:0140297;GO:2000323;	K21944	period circadian regulator 1 [Source:HGNC Symbol;Acc:HGNC:8845]	sp|Q8CHI5|PER1_RAT Period circadian protein homolog 1 OS=Rattus norvegicus OX=10116 GN=Per1 PE=1 SV=2	veNOG03468	T	GO:0000122//negative regulation of transcription by RNA polymerase II;GO:0002028//regulation of sodium ion transport;GO:0007623//circadian rhythm;GO:0007623//circadian rhythm;GO:0009416//response to light stimulus;GO:0010608//posttranscriptional regulation of gene expression;GO:0032922//circadian regulation of gene expression;GO:0032922//circadian regulation of gene expression;GO:0042634//regulat…	GO:0005634//nucleus;GO:0005654//nucleoplasm;GO:0005737//cytoplasm;GO:0005829//cytosol;	GO:0000976//transcription cis-regulatory region binding;GO:0000978//RNA polymerase II cis-regulatory region sequence-specific DNA binding;GO:0005515//protein binding;GO:0019900//kinase binding;GO:0031490//chromatin DNA binding;GO:0031625//ubiquitin protein ligase binding;GO:0070888//E-box binding;GO:0140297//DNA-binding transcription factor binding;	ko04713(Circadian entrainment);ko04710(Circadian rhythm)
MSTRG.100524	ENSBGRG00000026727	MSTRG.100524.9,MSTRG.100524.8,MSTRG.100524.6,MSTRG.100524.10	39904	19[+]40193659-40199034	19[+]40149527-40153755	AURKB	GO:0000122;GO:0000775;GO:0000776;GO:0000779;GO:0000779;GO:0002903;GO:0004672;GO:0004674;GO:0004674;GO:0004674;GO:0005524;GO:0005634;GO:0005634;GO:0005654;GO:0005694;GO:0006468;GO:0006468;GO:0007051;GO:0007094;GO:0010369;GO:0015630;GO:0019900;GO:0030496;GO:0030496;GO:0032091;GO:0032133;GO:0032133;GO:0032133;GO:0032212;GO:0032467;GO:0032467;GO:0034501;GO:0034644;GO:0036089;GO:0043687;GO:0043988;GO:…	K11479	aurora kinase B [Source:HGNC Symbol;Acc:HGNC:11390]	sp|Q7YRC6|AURKB_BOVIN Aurora kinase B OS=Bos taurus OX=9913 GN=AURKB PE=2 SV=1	veNOG10148	D	GO:0000122//negative regulation of transcription by RNA polymerase II;GO:0002903//negative regulation of B cell apoptotic process;GO:0006468//protein phosphorylation;GO:0006468//protein phosphorylation;GO:0007051//spindle organization;GO:0007094//mitotic spindle assembly checkpoint signaling;GO:0032091//negative regulation of protein binding;GO:0032212//positive regulation of telomere maintenance…	GO:0000775//chromosome, centromeric region;GO:0000776//kinetochore;GO:0000779//condensed chromosome, centromeric region;GO:0000779//condensed chromosome, centromeric region;GO:0005634//nucleus;GO:0005634//nucleus;GO:0005654//nucleoplasm;GO:0005694//chromosome;GO:0010369//chromocenter;GO:0015630//microtubule cytoskeleton;GO:0030496//midbody;GO:0030496//midbody;GO:0032133//chromosome passenger comp…	GO:0004672//protein kinase activity;GO:0004674//protein serine/threonine kinase activity;GO:0004674//protein serine/threonine kinase activity;GO:0004674//protein serine/threonine kinase activity;GO:0005524//ATP binding;GO:0019900//kinase binding;GO:0044022//histone kinase activity (H3-S28 specific);GO:0004672//protein kinase activity;GO:0004674//protein serine/threonine kinase activity;GO:0005524…	-
MSTRG.10054	ENSBGRG00000015425	MSTRG.10054.1	0	1[-]118780421-118781802	1[-]118642582-119113781	RSRC1	GO:0000380;GO:0000380;GO:0000398;GO:0000398;GO:0005634;GO:0005737;GO:0006468;GO:0006913;GO:0008380;GO:0016607;GO:0046677;GO:0000380;GO:0000398;GO:0000380;GO:0000398;GO:0000380;GO:0000398;	K24594	arginine and serine rich coiled-coil 1 [Source:HGNC Symbol;Acc:HGNC:24152]	sp|Q2T9Y0|RSRC1_BOVIN Serine/Arginine-related protein 53 OS=Bos taurus OX=9913 GN=RSRC1 PE=2 SV=1	veNOG18112	J	GO:0000380//alternative mRNA splicing, via spliceosome;GO:0000380//alternative mRNA splicing, via spliceosome;GO:0000398//mRNA splicing, via spliceosome;GO:0000398//mRNA splicing, via spliceosome;GO:0006468//protein phosphorylation;GO:0006913//nucleocytoplasmic transport;GO:0008380//RNA splicing;GO:0046677//response to antibiotic;GO:0000380//alternative mRNA splicing, via spliceosome;GO:0000398//…	GO:0005634//nucleus;GO:0005737//cytoplasm;GO:0016607//nuclear speck;	-	-
MSTRG.10054	ENSBGRG00000015623	MSTRG.10054.1	34824	1[-]118780421-118781802	1[+]118744734-118745597	-	GO:0003735;GO:0005840;GO:0006412;	K02934	-	sp|Q58DQ3|RL6_BOVIN 60S ribosomal protein L6 OS=Bos taurus OX=9913 GN=RPL6 PE=2 SV=3	veNOG11695	J	GO:0006412//translation;	GO:0005840//ribosome;	GO:0003735//structural constituent of ribosome;	ko05171(Coronavirus disease - COVID-19);ko03010(Ribosome)
MSTRG.100544	ENSBGRG00000010801	MSTRG.100544.6	84348	19[-]40410583-40411737	19[-]40496085-40497532	CYB5D1	-	-	cytochrome b5 domain containing 1 [Source:HGNC Symbol;Acc:HGNC:26516]	sp|Q6P9G0|CB5D1_HUMAN Cytochrome b5 domain-containing protein 1 OS=Homo sapiens OX=9606 GN=CYB5D1 PE=2 SV=1	veNOG00692	C	-	-	-	-
[truncated: 168,446 more rows]

## Sheet: LP vs HP
Cis effect lncRNAs and their targets information									GO enrichment analysis for the targets of cis lncRNAs									KEGG pathway analysis for the targets of cis lncRNAs
[truncated: 6,413 more rows]

[truncated: 2 more sheets: LP vs MP, MP vs HP]
