# Supplementary material for: Whole transcriptomic analysis revealed the effects of different dietary protein levels on the growth and development of Jersey-yak
Source: Research Square preprint supplement (doi:10.21203/rs.3.rs-7466956/v1), 2025-09-30
Supplement: Supplementary file 2 [file 38a7c18d14da59250d52c9bc.xlsx]

## Sheet: LP vs MP
GO analysis for differential expression mRNAs between LP vs MP												KEGG pathway analysis for differential expression mRNAs between LP vs MP
Category	GO.ID	Term	Up	Down	DEG	Total	Up_Gene	Down_Gene	P_value	FDR		PathwayID	Pathway	Level1	Level2	Up_number	Down_number	DEG_number	total_number	Pvalue	FDR	Up_gene	Down_gene	URL
BP	GO:1902732	positive regulation of chondrocyte proliferation	2	2	4	9	ENSBGRG00000006516(SIX2),ENSBGRG00000008978(PBXIP1)	ENSBGRG00000000772(COMP),ENSBGRG00000006944(LEF1)	3.77408e-05	0.136244		ko04726	Serotonergic synapse	Organismal Systems	Nervous system	4	3	7	95	0.00365941	0.324487	ENSBGRG00000020868(HTR2A),ENSBGRG00000018072(HTR4),ENSBGRG00000018161(PRKCA),ENSBGRG00000013821(PTGS1)	ENSBGRG00000021516(GNAO1),ENSBGRG00000020580(CASP3),ENSBGRG00000001555(GNAI3)	http://www.kegg.jp/kegg-bin/show_pathway?map=map04726&multi_query=K02677+%23FFFFFF,red%0d%0aK04160+%23FFFFFF,red%0d%0aK02187+%23FFFFFF,green%0d%0aK04534+%23FFFFFF,green%0d%0aK00509+%23FFFFFF,red%0d%0aK04157+%23FFFFFF,red%0d%0aK04630+%23FFFFFF,green%0d%0a
BP	GO:0072161	mesenchymal cell differentiation involved in kidney development	3	0	3	5	ENSBGRG00000006516(SIX2),ENSBGRG00000009986(AMER1),ENSBGRG00000021840(OSR1)	-	0.00013331	0.160416		ko00532	Glycosaminoglycan biosynthesis - chondroitin sulfate / dermatan sulfate	Metabolism	Glycan biosynthesis and metabolism	3	0	3	16	0.0041339	0.324487	ENSBGRG00000006039(XYLT2),ENSBGRG00000019378(CHPF),ENSBGRG00000006836(CHPF2)	-	http://www.kegg.jp/kegg-bin/show_pathway?map=map00532&multi_query=K00747+%23FFFFFF,red%0d%0aK00771+%23FFFFFF,red%0d%0aK03419+%23FFFFFF,red%0d%0a
BP	GO:2001012	mesenchymal cell differentiation involved in renal system development	3	0	3	5	ENSBGRG00000006516(SIX2),ENSBGRG00000009986(AMER1),ENSBGRG00000021840(OSR1)	-	0.00013331	0.160416		ko04212	Longevity regulating pathway - worm	Organismal Systems	Aging	4	2	6	74	0.00439986	0.324487	ENSBGRG00000026571,ENSBGRG00000013185(IRS1),ENSBGRG00000000753(CLPP),ENSBGRG00000015277	ENSBGRG00000002112(GSTM3),ENSBGRG00000020093	http://www.kegg.jp/kegg-bin/show_pathway?map=map04212&multi_query=K18461+%23FFFFFF,red%0d%0aK04564+%23FFFFFF,red%0d%0aK16172+%23FFFFFF,red%0d%0aK00799+%23FFFFFF,green%0d%0aK01358+%23FFFFFF,red%0d%0a
BP	GO:0019318	hexose metabolic process	10	2	12	144	ENSBGRG00000001042,ENSBGRG00000008221(MAN2A2),ENSBGRG00000009694(KCNJ11),ENSBGRG00000010063(C1QTNF3),ENSBGRG00000013185(IRS1),ENSBGRG00000019832(C1QTNF1),ENSBGRG00000020745(PGP),ENSBGRG00000025209(MPI),ENSBGRG00000026260(ENO3),ENSBGRG00000026388(ALDOA)	ENSBGRG00000012579(FOXO1),ENSBGRG00000021648(ENPP1)	0.000186904	0.168681		ko04974	Protein digestion and absorption	Organismal Systems	Digestive system	4	3	7	100	0.00486122	0.324487	ENSBGRG00000005255(COL5A1),ENSBGRG00000024606(COL21A1),ENSBGRG00000020183(COL15A1),ENSBGRG00000000863(COL6A2)	ENSBGRG00000024054(COL22A1),ENSBGRG00000013873(COL13A1),ENSBGRG00000009561(COL11A1)	http://www.kegg.jp/kegg-bin/show_pathway?map=map04974&multi_query=K19721+%23FFFFFF,purple%0d%0aK16629+%23FFFFFF,red%0d%0aK16630+%23FFFFFF,green%0d%0aK06238+%23FFFFFF,red%0d%0aK16617+%23FFFFFF,green%0d%0aK08135+%23FFFFFF,red%0d%0a
BP	GO:0030199	collagen fibril organization	5	1	6	42	ENSBGRG00000005255(COL5A1),ENSBGRG00000009514(ADAMTS12),ENSBGRG00000010797(FKBP10),ENSBGRG00000012069(EMILIN1),ENSBGRG00000025536(PLOD3)	ENSBGRG00000000772(COMP)	0.000469058	0.296882		ko04933	AGE-RAGE signaling pathway in diabetic complications	Human Diseases	Endocrine and metabolic disease	3	3	6	90	0.0112628	0.443843	ENSBGRG00000008928(VEGFC),ENSBGRG00000018161(PRKCA),ENSBGRG00000023889(MMP2)	ENSBGRG00000025440(SERPINE1),ENSBGRG00000020580(CASP3),ENSBGRG00000012579(FOXO1)	http://www.kegg.jp/kegg-bin/show_pathway?map=map04933&multi_query=K01398+%23FFFFFF,red%0d%0aK02677+%23FFFFFF,red%0d%0aK03982+%23FFFFFF,green%0d%0aK05449+%23FFFFFF,red%0d%0aK02187+%23FFFFFF,green%0d%0aK07201+%23FFFFFF,green%0d%0a
BP	GO:0005996	monosaccharide metabolic process	10	2	12	160	ENSBGRG00000001042,ENSBGRG00000008221(MAN2A2),ENSBGRG00000009694(KCNJ11),ENSBGRG00000010063(C1QTNF3),ENSBGRG00000013185(IRS1),ENSBGRG00000019832(C1QTNF1),ENSBGRG00000020745(PGP),ENSBGRG00000025209(MPI),ENSBGRG00000026260(ENO3),ENSBGRG00000026388(ALDOA)	ENSBGRG00000012579(FOXO1),ENSBGRG00000021648(ENPP1)	0.000493433	0.296882		ko05133	Pertussis	Human Diseases	Infectious disease: bacterial	3	2	5	67	0.0128799	0.443843	ENSBGRG00000003422(C1QA),ENSBGRG00000003430(C1QC),ENSBGRG00000013000(NOS2)	ENSBGRG00000020580(CASP3),ENSBGRG00000001555(GNAI3)	http://www.kegg.jp/kegg-bin/show_pathway?map=map05133&multi_query=K03988+%23FFFFFF,red%0d%0aK03986+%23FFFFFF,red%0d%0aK04630+%23FFFFFF,green%0d%0aK02187+%23FFFFFF,green%0d%0aK13241+%23FFFFFF,red%0d%0a
BP	GO:0030198	extracellular matrix organization	10	3	13	195	ENSBGRG00000000934(ADAMTSL4),ENSBGRG00000002127(OLFML2B),ENSBGRG00000005255(COL5A1),ENSBGRG00000008978(PBXIP1),ENSBGRG00000009514(ADAMTS12),ENSBGRG00000010797(FKBP10),ENSBGRG00000012069(EMILIN1),ENSBGRG00000013383(ELN),ENSBGRG00000019277(NID1),ENSBGRG00000025536(PLOD3)	ENSBGRG00000000772(COMP),ENSBGRG00000010677(VIT),ENSBGRG00000010987(ANGPTL7)	0.000889387	0.352753		ko04730	Long-term depression	Organismal Systems	Nervous system	2	2	4	44	0.0131315	0.443843	ENSBGRG00000010476(GRIA3),ENSBGRG00000018161(PRKCA)	ENSBGRG00000001555(GNAI3),ENSBGRG00000021516(GNAO1)	http://www.kegg.jp/kegg-bin/show_pathway?map=map04730&multi_query=K04534+%23FFFFFF,green%0d%0aK05199+%23FFFFFF,red%0d%0aK02677+%23FFFFFF,red%0d%0aK04630+%23FFFFFF,green%0d%0a
BP	GO:0001655	urogenital system development	14	1	15	246	ENSBGRG00000000399(CRLF1),ENSBGRG00000002743(RARG),ENSBGRG00000004562(ID3),ENSBGRG00000006516(SIX2),ENSBGRG00000007158(SOX8),ENSBGRG00000009080(PYGO2),ENSBGRG00000009986(AMER1),ENSBGRG00000010067(GDF11),ENSBGRG00000013522(LGR5),ENSBGRG00000015957(GLIS2),ENSBGRG00000019277(NID1),ENSBGRG00000021566(PKHD1),ENSBGRG00000021840(OSR1),ENSBGRG00000025121(SERPINF1)	ENSBGRG00000016750(TIPARP)	0.000924088	0.352753		ko04921	Oxytocin signaling pathway	Organismal Systems	Endocrine system	5	2	7	124	0.0151089	0.443843	ENSBGRG00000010579,ENSBGRG00000010518(MYLK4),ENSBGRG00000000154(RCAN1),ENSBGRG00000017954(CACNG1),ENSBGRG00000018161(PRKCA)	ENSBGRG00000001555(GNAI3),ENSBGRG00000021516(GNAO1)	http://www.kegg.jp/kegg-bin/show_pathway?map=map04921&multi_query=K00907+%23FFFFFF,red%0d%0aK04630+%23FFFFFF,green%0d%0aK04866+%23FFFFFF,red%0d%0aK02677+%23FFFFFF,red%0d%0aK05005+%23FFFFFF,red%0d%0aK17901+%23FFFFFF,red%0d%0aK04534+%23FFFFFF,green%0d%0a
BP	GO:0035988	chondrocyte proliferation	2	2	4	19	ENSBGRG00000006516(SIX2),ENSBGRG00000008978(PBXIP1)	ENSBGRG00000000772(COMP),ENSBGRG00000006944(LEF1)	0.000959432	0.352753		ko04066	HIF-1 signaling pathway	Environmental Information Processing	Signal transduction	5	1	6	98	0.0166283	0.443843	ENSBGRG00000018161(PRKCA),ENSBGRG00000001042,ENSBGRG00000026388(ALDOA),ENSBGRG00000013000(NOS2),ENSBGRG00000026260(ENO3)	ENSBGRG00000025440(SERPINE1)	http://www.kegg.jp/kegg-bin/show_pathway?map=map04066&multi_query=K00134+%23FFFFFF,red%0d%0aK13241+%23FFFFFF,red%0d%0aK01623+%23FFFFFF,red%0d%0aK02677+%23FFFFFF,red%0d%0aK03982+%23FFFFFF,green%0d%0aK01689+%23FFFFFF,red%0d%0a
BP	GO:0043062	extracellular structure organization	10	3	13	197	ENSBGRG00000000934(ADAMTSL4),ENSBGRG00000002127(OLFML2B),ENSBGRG00000005255(COL5A1),ENSBGRG00000008978(PBXIP1),ENSBGRG00000009514(ADAMTS12),ENSBGRG00000010797(FKBP10),ENSBGRG00000012069(EMILIN1),ENSBGRG00000013383(ELN),ENSBGRG00000019277(NID1),ENSBGRG00000025536(PLOD3)	ENSBGRG00000000772(COMP),ENSBGRG00000010677(VIT),ENSBGRG00000010987(ANGPTL7)	0.000977155	0.352753		ko05142	Chagas disease	Human Diseases	Infectious disease: parasitic	3	3	6	101	0.0190305	0.443843	ENSBGRG00000003422(C1QA),ENSBGRG00000013000(NOS2),ENSBGRG00000003430(C1QC)	ENSBGRG00000025440(SERPINE1),ENSBGRG00000001555(GNAI3),ENSBGRG00000021516(GNAO1)	http://www.kegg.jp/kegg-bin/show_pathway?map=map05142&multi_query=K04630+%23FFFFFF,green%0d%0aK04534+%23FFFFFF,green%0d%0aK13241+%23FFFFFF,red%0d%0aK03988+%23FFFFFF,red%0d%0aK03986+%23FFFFFF,red%0d%0aK03982+%23FFFFFF,green%0d%0a
BP	GO:0001503	ossification	10	5	15	255	ENSBGRG00000002228(IGFBP5),ENSBGRG00000004562(ID3),ENSBGRG00000006516(SIX2),ENSBGRG00000007158(SOX8),ENSBGRG00000008928(VEGFC),ENSBGRG00000009028(ZHX3),ENSBGRG00000009514(ADAMTS12),ENSBGRG00000021840(OSR1),ENSBGRG00000023703(HDAC7),ENSBGRG00000023889(MMP2)	ENSBGRG00000000772(COMP),ENSBGRG00000001644(SNX10),ENSBGRG00000006944(LEF1),ENSBGRG00000013873(COL13A1),ENSBGRG00000021648(ENPP1)	0.00132582	0.417971		ko00603	Glycosphingolipid biosynthesis - globo and isoglobo series	Metabolism	Glycan biosynthesis and metabolism	2	0	2	11	0.0211915	0.443843	ENSBGRG00000018685(GBGT1),ENSBGRG00000010420(NAGA)	-	http://www.kegg.jp/kegg-bin/show_pathway?map=map00603&multi_query=K00722+%23FFFFFF,red%0d%0aK01204+%23FFFFFF,red%0d%0a
BP	GO:0061448	connective tissue development	10	2	12	180	ENSBGRG00000002743(RARG),ENSBGRG00000005255(COL5A1),ENSBGRG00000006516(SIX2),ENSBGRG00000007158(SOX8),ENSBGRG00000008276(SLC25A25),ENSBGRG00000008978(PBXIP1),ENSBGRG00000009514(ADAMTS12),ENSBGRG00000009629(BMP1),ENSBGRG00000009986(AMER1),ENSBGRG00000021840(OSR1)	ENSBGRG00000000772(COMP),ENSBGRG00000024594(MEX3C)	0.00138938	0.417971		ko00480	Glutathione metabolism	Metabolism	Metabolism of other amino acids	1	3	4	51	0.0216103	0.443843	ENSBGRG00000003388(GPX7)	ENSBGRG00000006702(GPX3),ENSBGRG00000002112(GSTM3),ENSBGRG00000020093	http://www.kegg.jp/kegg-bin/show_pathway?map=map00480&multi_query=K00799+%23FFFFFF,green%0d%0aK00432+%23FFFFFF,purple%0d%0a
BP	GO:0097043	histone H3-K56 acetylation	1	1	2	3	ENSBGRG00000008978(PBXIP1)	ENSBGRG00000006944(LEF1)	0.00170531	0.473551		ko04923	Regulation of lipolysis in adipocytes	Organismal Systems	Endocrine system	3	1	4	51	0.0216103	0.443843	ENSBGRG00000013185(IRS1),ENSBGRG00000026296(ADORA1),ENSBGRG00000013821(PTGS1)	ENSBGRG00000001555(GNAI3)	http://www.kegg.jp/kegg-bin/show_pathway?map=map04923&multi_query=K04265+%23FFFFFF,red%0d%0aK00509+%23FFFFFF,red%0d%0aK16172+%23FFFFFF,red%0d%0aK04630+%23FFFFFF,green%0d%0a
BP	GO:0072074	kidney mesenchyme development	3	0	3	11	ENSBGRG00000006516(SIX2),ENSBGRG00000009986(AMER1),ENSBGRG00000021840(OSR1)	-	0.00197495	0.509254		ko04926	Relaxin signaling pathway	Organismal Systems	Endocrine system	4	2	6	114	0.0321716	0.604265	ENSBGRG00000023889(MMP2),ENSBGRG00000018161(PRKCA),ENSBGRG00000013000(NOS2),ENSBGRG00000008928(VEGFC)	ENSBGRG00000021516(GNAO1),ENSBGRG00000001555(GNAI3)	http://www.kegg.jp/kegg-bin/show_pathway?map=map04926&multi_query=K04630+%23FFFFFF,green%0d%0aK01398+%23FFFFFF,red%0d%0aK05449+%23FFFFFF,red%0d%0aK02677+%23FFFFFF,red%0d%0aK13241+%23FFFFFF,red%0d%0aK04534+%23FFFFFF,green%0d%0a
BP	GO:0006006	glucose metabolic process	7	2	9	118	ENSBGRG00000001042,ENSBGRG00000009694(KCNJ11),ENSBGRG00000010063(C1QTNF3),ENSBGRG00000013185(IRS1),ENSBGRG00000019832(C1QTNF1),ENSBGRG00000020745(PGP),ENSBGRG00000026260(ENO3)	ENSBGRG00000012579(FOXO1),ENSBGRG00000021648(ENPP1)	0.0021821	0.525159		ko04916	Melanogenesis	Organismal Systems	Endocrine system	2	3	5	86	0.0339475	0.604265	ENSBGRG00000015740,ENSBGRG00000018161(PRKCA)	ENSBGRG00000006944(LEF1),ENSBGRG00000021516(GNAO1),ENSBGRG00000001555(GNAI3)	http://www.kegg.jp/kegg-bin/show_pathway?map=map04916&multi_query=K02677+%23FFFFFF,red%0d%0aK04534+%23FFFFFF,green%0d%0aK04492+%23FFFFFF,green%0d%0aK04630+%23FFFFFF,green%0d%0aK05228+%23FFFFFF,red%0d%0a
BP	GO:0009896	positive regulation of catabolic process	13	3	16	298	ENSBGRG00000000549(ATG101),ENSBGRG00000000977(CERS1),ENSBGRG00000007476(TRIM8),ENSBGRG00000009986(AMER1),ENSBGRG00000013185(IRS1),ENSBGRG00000013275(HSPBP1),ENSBGRG00000020868(HTR2A),ENSBGRG00000021046(SNX18),ENSBGRG00000021074(ORMDL3),ENSBGRG00000022555(TRIM65),ENSBGRG00000025151(MARCHF2),ENSBGRG00000025223(NOP53),ENSBGRG00000026911(ZC3H18)	ENSBGRG00000001555(GNAI3),ENSBGRG00000012579(FOXO1),ENSBGRG00000016750(TIPARP)	0.00236883	0.534468		ko04930	Type II diabetes mellitus	Human Diseases	Endocrine and metabolic disease	3	0	3	39	0.0476009	0.700534	ENSBGRG00000013185(IRS1),ENSBGRG00000009694(KCNJ11),ENSBGRG00000009791(ABCC8)	-	http://www.kegg.jp/kegg-bin/show_pathway?map=map04930&multi_query=K05032+%23FFFFFF,red%0d%0aK05004+%23FFFFFF,red%0d%0aK16172+%23FFFFFF,red%0d%0a
BP	GO:0030852	regulation of granulocyte differentiation	1	2	3	12	ENSBGRG00000003430(C1QC)	ENSBGRG00000006944(LEF1),ENSBGRG00000015582(EVI2B)	0.0025866	0.546507		ko04918	Thyroid hormone synthesis	Organismal Systems	Endocrine system	2	2	4	67	0.0514161	0.700534	ENSBGRG00000018161(PRKCA),ENSBGRG00000003388(GPX7)	ENSBGRG00000006702(GPX3),ENSBGRG00000007032(IYD)	http://www.kegg.jp/kegg-bin/show_pathway?map=map04918&multi_query=K02677+%23FFFFFF,red%0d%0aK00432+%23FFFFFF,purple%0d%0aK17231+%23FFFFFF,green%0d%0a
BP	GO:0072001	renal system development	12	1	13	223	ENSBGRG00000000399(CRLF1),ENSBGRG00000004562(ID3),ENSBGRG00000006516(SIX2),ENSBGRG00000007158(SOX8),ENSBGRG00000009080(PYGO2),ENSBGRG00000009986(AMER1),ENSBGRG00000010067(GDF11),ENSBGRG00000013522(LGR5),ENSBGRG00000015957(GLIS2),ENSBGRG00000019277(NID1),ENSBGRG00000021566(PKHD1),ENSBGRG00000021840(OSR1)	ENSBGRG00000016750(TIPARP)	0.00294886	0.546507		ko05322	Systemic lupus erythematosus	Human Diseases	Immune disease	6	0	6	128	0.0517553	0.700534	ENSBGRG00000003422(C1QA),ENSBGRG00000016458,ENSBGRG00000016242,ENSBGRG00000015411,ENSBGRG00000019125,ENSBGRG00000003430(C1QC)	-	http://www.kegg.jp/kegg-bin/show_pathway?map=map05322&multi_query=K11252+%23FFFFFF,red%0d%0aK11253+%23FFFFFF,red%0d%0aK06752+%23FFFFFF,red%0d%0aK03986+%23FFFFFF,red%0d%0aK03988+%23FFFFFF,red%0d%0a
BP	GO:0001706	endoderm formation	4	1	5	42	ENSBGRG00000002480(SOX7),ENSBGRG00000005255(COL5A1),ENSBGRG00000014725(MMP15),ENSBGRG00000023889(MMP2)	ENSBGRG00000009561(COL11A1)	0.00321061	0.546507		ko04936	Alcoholic liver disease	Human Diseases	Endocrine and metabolic disease	3	3	6	128	0.0517553	0.700534	ENSBGRG00000003422(C1QA),ENSBGRG00000023169(CPT1C),ENSBGRG00000003430(C1QC)	ENSBGRG00000006944(LEF1),ENSBGRG00000012579(FOXO1),ENSBGRG00000020580(CASP3)	http://www.kegg.jp/kegg-bin/show_pathway?map=map04936&multi_query=K04492+%23FFFFFF,green%0d%0aK03988+%23FFFFFF,red%0d%0aK07201+%23FFFFFF,green%0d%0aK19524+%23FFFFFF,red%0d%0aK03986+%23FFFFFF,red%0d%0aK02187+%23FFFFFF,green%0d%0a
BP	GO:0009214	cyclic nucleotide catabolic process	2	0	2	4	ENSBGRG00000013438(CNP),ENSBGRG00000019109(PDE9A)	-	0.00335632	0.546507		ko04611	Platelet activation	Organismal Systems	Immune system	4	1	5	97	0.0524745	0.700534	ENSBGRG00000010518(MYLK4),ENSBGRG00000013821(PTGS1),ENSBGRG00000008364(ORAI1),ENSBGRG00000012398(P2RY1)	ENSBGRG00000001555(GNAI3)	http://www.kegg.jp/kegg-bin/show_pathway?map=map04611&multi_query=K00907+%23FFFFFF,red%0d%0aK00509+%23FFFFFF,red%0d%0aK04630+%23FFFFFF,green%0d%0aK16056+%23FFFFFF,red%0d%0aK04270+%23FFFFFF,red%0d%0a
BP	GO:1900182	positive regulation of protein localization to nucleus	5	1	6	61	ENSBGRG00000001780(MCRS1),ENSBGRG00000006287(TESK1),ENSBGRG00000007476(TRIM8),ENSBGRG00000015957(GLIS2),ENSBGRG00000021074(ORMDL3)	ENSBGRG00000007330(PARP9)	0.00338961	0.546507		ko05016	Huntington disease	Human Diseases	Neurodegenerative disease	5	5	10	276	0.0639528	0.731452	ENSBGRG00000026571,ENSBGRG00000013230(POLR2E),ENSBGRG00000010476(GRIA3),ENSBGRG00000000549(ATG101),ENSBGRG00000003388(GPX7)	ENSBGRG00000019080(TBPL1),ENSBGRG00000006702(GPX3),ENSBGRG00000001376(DNAH7),ENSBGRG00000018062(DNAH5),ENSBGRG00000020580(CASP3)	http://www.kegg.jp/kegg-bin/show_pathway?map=map05016&multi_query=K04564+%23FFFFFF,red%0d%0aK19730+%23FFFFFF,red%0d%0aK03120+%23FFFFFF,green%0d%0aK00432+%23FFFFFF,purple%0d%0aK10408+%23FFFFFF,green%0d%0aK03013+%23FFFFFF,red%0d%0aK02187+%23FFFFFF,green%0d%0aK05199+%23FFFFFF,red%0d%0a
BP	GO:0010508	positive regulation of autophagy	6	2	8	103	ENSBGRG00000000549(ATG101),ENSBGRG00000000977(CERS1),ENSBGRG00000007476(TRIM8),ENSBGRG00000021046(SNX18),ENSBGRG00000021074(ORMDL3),ENSBGRG00000022555(TRIM65)	ENSBGRG00000001555(GNAI3),ENSBGRG00000012579(FOXO1)	0.00339022	0.546507		ko04670	Leukocyte transendothelial migration	Organismal Systems	Immune system	3	2	5	103	0.0646483	0.731452	ENSBGRG00000023889(MMP2),ENSBGRG00000018161(PRKCA),ENSBGRG00000000800(CLDN1)	ENSBGRG00000001555(GNAI3),ENSBGRG00000015132(RASSF5)	http://www.kegg.jp/kegg-bin/show_pathway?map=map04670&multi_query=K04630+%23FFFFFF,green%0d%0aK08015+%23FFFFFF,green%0d%0aK02677+%23FFFFFF,red%0d%0aK06087+%23FFFFFF,red%0d%0aK01398+%23FFFFFF,red%0d%0a
BP	GO:0031331	positive regulation of cellular catabolic process	12	2	14	255	ENSBGRG00000000549(ATG101),ENSBGRG00000000977(CERS1),ENSBGRG00000007476(TRIM8),ENSBGRG00000013185(IRS1),ENSBGRG00000013275(HSPBP1),ENSBGRG00000020868(HTR2A),ENSBGRG00000021046(SNX18),ENSBGRG00000021074(ORMDL3),ENSBGRG00000022555(TRIM65),ENSBGRG00000025151(MARCHF2),ENSBGRG00000025223(NOP53),ENSBGRG00000026911(ZC3H18)	ENSBGRG00000001555(GNAI3),ENSBGRG00000012579(FOXO1)	0.00356424	0.546507		ko00770	Pantothenate and CoA biosynthesis	Metabolism	Metabolism of cofactors and vitamins	1	1	2	20	0.0647844	0.731452	ENSBGRG00000024474(GADL1)	ENSBGRG00000021648(ENPP1)	http://www.kegg.jp/kegg-bin/show_pathway?map=map00770&multi_query=K01513+%23FFFFFF,green%0d%0aK18966+%23FFFFFF,red%0d%0a
BP	GO:0072087	renal vesicle development	3	0	3	15	ENSBGRG00000006516(SIX2),ENSBGRG00000007158(SOX8),ENSBGRG00000021840(OSR1)	-	0.00507081	0.546507		ko05145	Toxoplasmosis	Human Diseases	Infectious disease: parasitic	2	3	5	105	0.069031	0.731452	ENSBGRG00000019125,ENSBGRG00000013000(NOS2)	ENSBGRG00000001555(GNAI3),ENSBGRG00000020580(CASP3),ENSBGRG00000021516(GNAO1)	http://www.kegg.jp/kegg-bin/show_pathway?map=map05145&multi_query=K04630+%23FFFFFF,green%0d%0aK06752+%23FFFFFF,red%0d%0aK04534+%23FFFFFF,green%0d%0aK02187+%23FFFFFF,green%0d%0aK13241+%23FFFFFF,red%0d%0a
BP	GO:0035989	tendon development	1	1	2	5	ENSBGRG00000005255(COL5A1)	ENSBGRG00000000772(COMP)	0.00550499	0.546507		ko00534	Glycosaminoglycan biosynthesis - heparan sulfate / heparin	Metabolism	Glycan biosynthesis and metabolism	1	1	2	21	0.0706465	0.731452	ENSBGRG00000006039(XYLT2)	ENSBGRG00000020997(GLCE)	http://www.kegg.jp/kegg-bin/show_pathway?map=map00534&multi_query=K00771+%23FFFFFF,red%0d%0aK01793+%23FFFFFF,green%0d%0a
BP	GO:0045046	protein import into peroxisome membrane	1	1	2	5	ENSBGRG00000010057(PEX16)	ENSBGRG00000003715(RAB8B)	0.00550499	0.546507		ko02010	ABC transporters	Environmental Information Processing	Membrane transport	2	1	3	46	0.0712276	0.731452	ENSBGRG00000012998(ABCC10),ENSBGRG00000009791(ABCC8)	ENSBGRG00000024796(ABCA10)	http://www.kegg.jp/kegg-bin/show_pathway?map=map02010&multi_query=K05032+%23FFFFFF,red%0d%0aK05674+%23FFFFFF,red%0d%0aK05652+%23FFFFFF,green%0d%0a
BP	GO:0097168	mesenchymal stem cell proliferation	2	0	2	5	ENSBGRG00000006516(SIX2),ENSBGRG00000008928(VEGFC)	-	0.00550499	0.546507		ko04146	Peroxisome	Cellular Processes	Transport and catabolism	3	1	4	77	0.0775819	0.74513	ENSBGRG00000026571,ENSBGRG00000010057(PEX16),ENSBGRG00000013000(NOS2)	ENSBGRG00000024244	http://www.kegg.jp/kegg-bin/show_pathway?map=map04146&multi_query=K04564+%23FFFFFF,red%0d%0aK17879+%23FFFFFF,green%0d%0aK13335+%23FFFFFF,red%0d%0aK13241+%23FFFFFF,red%0d%0a
BP	GO:1901490	regulation of lymphangiogenesis	2	0	2	5	ENSBGRG00000008928(VEGFC),ENSBGRG00000010704(VASH1)	-	0.00550499	0.546507		ko04211	Longevity regulating pathway	Organismal Systems	Aging	3	1	4	78	0.0805067	0.74513	ENSBGRG00000000549(ATG101),ENSBGRG00000013185(IRS1),ENSBGRG00000026571	ENSBGRG00000012579(FOXO1)	http://www.kegg.jp/kegg-bin/show_pathway?map=map04211&multi_query=K16172+%23FFFFFF,red%0d%0aK04564+%23FFFFFF,red%0d%0aK07201+%23FFFFFF,green%0d%0aK19730+%23FFFFFF,red%0d%0a
BP	GO:0001822	kidney development	11	1	12	213	ENSBGRG00000000399(CRLF1),ENSBGRG00000004562(ID3),ENSBGRG00000006516(SIX2),ENSBGRG00000007158(SOX8),ENSBGRG00000009080(PYGO2),ENSBGRG00000009986(AMER1),ENSBGRG00000010067(GDF11),ENSBGRG00000015957(GLIS2),ENSBGRG00000019277(NID1),ENSBGRG00000021566(PKHD1),ENSBGRG00000021840(OSR1)	ENSBGRG00000016750(TIPARP)	0.00551659	0.546507		ko05032	Morphine addiction	Human Diseases	Substance dependence	2	2	4	79	0.0834858	0.74513	ENSBGRG00000018161(PRKCA),ENSBGRG00000026296(ADORA1)	ENSBGRG00000021516(GNAO1),ENSBGRG00000001555(GNAI3)	http://www.kegg.jp/kegg-bin/show_pathway?map=map05032&multi_query=K04534+%23FFFFFF,green%0d%0aK02677+%23FFFFFF,red%0d%0aK04630+%23FFFFFF,green%0d%0aK04265+%23FFFFFF,red%0d%0a
BP	GO:0007026	negative regulation of microtubule depolymerization	2	1	3	16	ENSBGRG00000007767(NAV3),ENSBGRG00000016460(KATNB1)	ENSBGRG00000017033(HDGFL3)	0.00613093	0.546507		ko04020	Calcium signaling pathway	Environmental Information Processing	Signal transduction	8	0	8	219	0.0886879	0.74513	ENSBGRG00000025371(ATP2B2),ENSBGRG00000008928(VEGFC),ENSBGRG00000008364(ORAI1),ENSBGRG00000018161(PRKCA),ENSBGRG00000018072(HTR4),ENSBGRG00000010518(MYLK4),ENSBGRG00000013000(NOS2),ENSBGRG00000020868(HTR2A)	-	http://www.kegg.jp/kegg-bin/show_pathway?map=map04020&multi_query=K02677+%23FFFFFF,red%0d%0aK04157+%23FFFFFF,red%0d%0aK05850+%23FFFFFF,red%0d%0aK16056+%23FFFFFF,red%0d%0aK04160+%23FFFFFF,red%0d%0aK13241+%23FFFFFF,red%0d%0aK05449+%23FFFFFF,red%0d%0aK00907+%23FFFFFF,red%0d%0a
BP	GO:0031114	regulation of microtubule depolymerization	2	1	3	16	ENSBGRG00000007767(NAV3),ENSBGRG00000016460(KATNB1)	ENSBGRG00000017033(HDGFL3)	0.00613093	0.546507		ko04610	Complement and coagulation cascades	Organismal Systems	Immune system	2	2	4	81	0.0896046	0.74513	ENSBGRG00000003430(C1QC),ENSBGRG00000003422(C1QA)	ENSBGRG00000019079,ENSBGRG00000025440(SERPINE1)	http://www.kegg.jp/kegg-bin/show_pathway?map=map04610&multi_query=K03988+%23FFFFFF,red%0d%0aK04006+%23FFFFFF,green%0d%0aK03986+%23FFFFFF,red%0d%0aK03982+%23FFFFFF,green%0d%0a
BP	GO:0060021	roof of mouth development	4	2	6	69	ENSBGRG00000009080(PYGO2),ENSBGRG00000010067(GDF11),ENSBGRG00000021840(OSR1),ENSBGRG00000022648(TSHZ1)	ENSBGRG00000006944(LEF1),ENSBGRG00000016750(TIPARP)	0.00623812	0.546507		ko04925	Aldosterone synthesis and secretion	Organismal Systems	Endocrine system	4	0	4	82	0.0927431	0.74513	ENSBGRG00000008364(ORAI1),ENSBGRG00000025371(ATP2B2),ENSBGRG00000015740,ENSBGRG00000018161(PRKCA)	-	http://www.kegg.jp/kegg-bin/show_pathway?map=map04925&multi_query=K05228+%23FFFFFF,red%0d%0aK05850+%23FFFFFF,red%0d%0aK16056+%23FFFFFF,red%0d%0aK02677+%23FFFFFF,red%0d%0a
BP	GO:0032963	collagen metabolic process	5	0	5	49	ENSBGRG00000005255(COL5A1),ENSBGRG00000009321(RETREG3),ENSBGRG00000012069(EMILIN1),ENSBGRG00000023889(MMP2),ENSBGRG00000025536(PLOD3)	-	0.00627866	0.546507		ko04713	Circadian entrainment	Organismal Systems	Environmental adaptation	2	2	4	82	0.0927431	0.74513	ENSBGRG00000010476(GRIA3),ENSBGRG00000018161(PRKCA)	ENSBGRG00000001555(GNAI3),ENSBGRG00000021516(GNAO1)	http://www.kegg.jp/kegg-bin/show_pathway?map=map04713&multi_query=K05199+%23FFFFFF,red%0d%0aK04630+%23FFFFFF,green%0d%0aK04534+%23FFFFFF,green%0d%0aK02677+%23FFFFFF,red%0d%0a
BP	GO:0005975	carbohydrate metabolic process	14	4	18	390	ENSBGRG00000001042,ENSBGRG00000007556(ST6GALNAC6),ENSBGRG00000008221(MAN2A2),ENSBGRG00000009694(KCNJ11),ENSBGRG00000010063(C1QTNF3),ENSBGRG00000010420(NAGA),ENSBGRG00000013185(IRS1),ENSBGRG00000018685(GBGT1),ENSBGRG00000019832(C1QTNF1),ENSBGRG00000020745(PGP),ENSBGRG00000020868(HTR2A),ENSBGRG00000025209(MPI),ENSBGRG00000026260(ENO3),ENSBGRG00000026388(ALDOA)	ENSBGRG00000003576(KLB),ENSBGRG00000007763(LANCL3),ENSBGRG00000012579(FOXO1),ENSBGRG00000021648(ENPP1)	0.00645202	0.546507		ko04213	Longevity regulating pathway - multiple species	Organismal Systems	Aging	2	1	3	52	0.0948855	0.74513	ENSBGRG00000026571,ENSBGRG00000013185(IRS1)	ENSBGRG00000012579(FOXO1)	http://www.kegg.jp/kegg-bin/show_pathway?map=map04213&multi_query=K04564+%23FFFFFF,red%0d%0aK07201+%23FFFFFF,green%0d%0aK16172+%23FFFFFF,red%0d%0a
BP	GO:0070527	platelet aggregation	3	1	4	32	ENSBGRG00000007398(PEAR1),ENSBGRG00000018161(PRKCA),ENSBGRG00000019832(C1QTNF1)	ENSBGRG00000000772(COMP)	0.00696316	0.546507		ko04724	Glutamatergic synapse	Organismal Systems	Nervous system	2	2	4	88	0.112642	0.793336	ENSBGRG00000018161(PRKCA),ENSBGRG00000010476(GRIA3)	ENSBGRG00000021516(GNAO1),ENSBGRG00000001555(GNAI3)	http://www.kegg.jp/kegg-bin/show_pathway?map=map04724&multi_query=K05199+%23FFFFFF,red%0d%0aK02677+%23FFFFFF,red%0d%0aK04534+%23FFFFFF,green%0d%0aK04630+%23FFFFFF,green%0d%0a
BP	GO:1900180	regulation of protein localization to nucleus	5	2	7	93	ENSBGRG00000001780(MCRS1),ENSBGRG00000006287(TESK1),ENSBGRG00000007476(TRIM8),ENSBGRG00000015957(GLIS2),ENSBGRG00000021074(ORMDL3)	ENSBGRG00000007330(PARP9),ENSBGRG00000015132(RASSF5)	0.00710394	0.546507		ko05034	Alcoholism	Human Diseases	Substance dependence	4	2	6	158	0.113965	0.793336	ENSBGRG00000023703(HDAC7),ENSBGRG00000016458,ENSBGRG00000015411,ENSBGRG00000016242	ENSBGRG00000021516(GNAO1),ENSBGRG00000001555(GNAI3)	http://www.kegg.jp/kegg-bin/show_pathway?map=map05034&multi_query=K04534+%23FFFFFF,green%0d%0aK11252+%23FFFFFF,red%0d%0aK11408+%23FFFFFF,red%0d%0aK11253+%23FFFFFF,red%0d%0aK04630+%23FFFFFF,green%0d%0a
BP	GO:0046676	negative regulation of insulin secretion	3	0	3	17	ENSBGRG00000009694(KCNJ11),ENSBGRG00000013185(IRS1),ENSBGRG00000025509(KCNB1)	-	0.00731357	0.546507		ko00010	Glycolysis / Gluconeogenesis	Metabolism	Carbohydrate metabolism	3	0	3	58	0.121299	0.793336	ENSBGRG00000026260(ENO3),ENSBGRG00000001042,ENSBGRG00000026388(ALDOA)	-	http://www.kegg.jp/kegg-bin/show_pathway?map=map00010&multi_query=K01689+%23FFFFFF,red%0d%0aK00134+%23FFFFFF,red%0d%0aK01623+%23FFFFFF,red%0d%0a
BP	GO:0001704	formation of primary germ layer	5	2	7	94	ENSBGRG00000002480(SOX7),ENSBGRG00000005255(COL5A1),ENSBGRG00000006516(SIX2),ENSBGRG00000014725(MMP15),ENSBGRG00000023889(MMP2)	ENSBGRG00000006944(LEF1),ENSBGRG00000009561(COL11A1)	0.00752176	0.546507		ko04360	Axon guidance	Organismal Systems	Development and regeneration	3	3	6	161	0.121669	0.793336	ENSBGRG00000001699(SEMA6C),ENSBGRG00000026803(SEMA4C),ENSBGRG00000018161(PRKCA)	ENSBGRG00000022242(SEMA3A),ENSBGRG00000001555(GNAI3),ENSBGRG00000007052(NTN4)	http://www.kegg.jp/kegg-bin/show_pathway?map=map04360&multi_query=K06521+%23FFFFFF,red%0d%0aK04630+%23FFFFFF,green%0d%0aK02677+%23FFFFFF,red%0d%0aK06845+%23FFFFFF,green%0d%0aK06840+%23FFFFFF,green%0d%0aK06842+%23FFFFFF,red%0d%0a
BP	GO:1901343	negative regulation of vasculature development	4	3	7	95	ENSBGRG00000009361(STAB1),ENSBGRG00000010704(VASH1),ENSBGRG00000012069(EMILIN1),ENSBGRG00000025121(SERPINF1)	ENSBGRG00000010987(ANGPTL7),ENSBGRG00000017871(TNMD),ENSBGRG00000025440(SERPINE1)	0.00795749	0.546507		ko04024	cAMP signaling pathway	Environmental Information Processing	Signal transduction	6	1	7	200	0.126373	0.793336	ENSBGRG00000010476(GRIA3),ENSBGRG00000026296(ADORA1),ENSBGRG00000025371(ATP2B2),ENSBGRG00000008364(ORAI1),ENSBGRG00000018072(HTR4),ENSBGRG00000015740	ENSBGRG00000001555(GNAI3)	http://www.kegg.jp/kegg-bin/show_pathway?map=map04024&multi_query=K05228+%23FFFFFF,red%0d%0aK04265+%23FFFFFF,red%0d%0aK04160+%23FFFFFF,red%0d%0aK16056+%23FFFFFF,red%0d%0aK04630+%23FFFFFF,green%0d%0aK05199+%23FFFFFF,red%0d%0aK05850+%23FFFFFF,red%0d%0a
BP	GO:0003415	chondrocyte hypertrophy	1	1	2	6	ENSBGRG00000002743(RARG)	ENSBGRG00000024594(MEX3C)	0.00812656	0.546507		ko04130	SNARE interactions in vesicular transport	Genetic Information Processing	Folding, sorting and degradation	2	0	2	30	0.129787	0.793336	ENSBGRG00000012924(STX3),ENSBGRG00000005556(VAMP5)	-	http://www.kegg.jp/kegg-bin/show_pathway?map=map04130&multi_query=K08514+%23FFFFFF,red%0d%0aK08486+%23FFFFFF,red%0d%0a
BP	GO:0030210	heparin biosynthetic process	1	1	2	6	ENSBGRG00000006039(XYLT2)	ENSBGRG00000020997(GLCE)	0.00812656	0.546507		ko00051	Fructose and mannose metabolism	Metabolism	Carbohydrate metabolism	2	0	2	30	0.129787	0.793336	ENSBGRG00000025209(MPI),ENSBGRG00000026388(ALDOA)	-	http://www.kegg.jp/kegg-bin/show_pathway?map=map00051&multi_query=K01809+%23FFFFFF,red%0d%0aK01623+%23FFFFFF,red%0d%0a
BP	GO:0043569	negative regulation of insulin-like growth factor receptor signaling pathway	2	0	2	6	ENSBGRG00000002228(IGFBP5),ENSBGRG00000025584(CILP)	-	0.00812656	0.546507		ko04658	Th1 and Th2 cell differentiation	Organismal Systems	Immune system	1	3	4	93	0.130547	0.793336	ENSBGRG00000019125	ENSBGRG00000001762(STAT4),ENSBGRG00000000298(CD4),ENSBGRG00000009248(IL12RB2)	http://www.kegg.jp/kegg-bin/show_pathway?map=map04658&multi_query=K11222+%23FFFFFF,green%0d%0aK06454+%23FFFFFF,green%0d%0aK06752+%23FFFFFF,red%0d%0aK05064+%23FFFFFF,green%0d%0a
BP	GO:0051725	protein de-ADP-ribosylation	2	0	2	6	ENSBGRG00000009212(ADPRS),ENSBGRG00000009880(MACROD1)	-	0.00812656	0.546507		ko04261	Adrenergic signaling in cardiomyocytes	Organismal Systems	Circulatory system	4	1	5	128	0.130601	0.793336	ENSBGRG00000022985(SCN4B),ENSBGRG00000017954(CACNG1),ENSBGRG00000018161(PRKCA),ENSBGRG00000025371(ATP2B2)	ENSBGRG00000001555(GNAI3)	http://www.kegg.jp/kegg-bin/show_pathway?map=map04261&multi_query=K02677+%23FFFFFF,red%0d%0aK05850+%23FFFFFF,red%0d%0aK04866+%23FFFFFF,red%0d%0aK04630+%23FFFFFF,green%0d%0aK04848+%23FFFFFF,red%0d%0a
BP	GO:0098883	synapse pruning	2	0	2	6	ENSBGRG00000003422(C1QA),ENSBGRG00000003430(C1QC)	-	0.00812656	0.546507		ko04725	Cholinergic synapse	Organismal Systems	Nervous system	2	2	4	94	0.134263	0.793336	ENSBGRG00000010579,ENSBGRG00000018161(PRKCA)	ENSBGRG00000001555(GNAI3),ENSBGRG00000021516(GNAO1)	http://www.kegg.jp/kegg-bin/show_pathway?map=map04725&multi_query=K04534+%23FFFFFF,green%0d%0aK05005+%23FFFFFF,red%0d%0aK04630+%23FFFFFF,green%0d%0aK02677+%23FFFFFF,red%0d%0a
BP	GO:0010906	regulation of glucose metabolic process	4	2	6	73	ENSBGRG00000010063(C1QTNF3),ENSBGRG00000013185(IRS1),ENSBGRG00000019832(C1QTNF1),ENSBGRG00000020745(PGP)	ENSBGRG00000012579(FOXO1),ENSBGRG00000021648(ENPP1)	0.00818064	0.546507		ko00590	Arachidonic acid metabolism	Metabolism	Lipid metabolism	2	1	3	62	0.140239	0.793336	ENSBGRG00000013821(PTGS1),ENSBGRG00000003388(GPX7)	ENSBGRG00000006702(GPX3)	http://www.kegg.jp/kegg-bin/show_pathway?map=map00590&multi_query=K00432+%23FFFFFF,purple%0d%0aK00509+%23FFFFFF,red%0d%0a
BP	GO:0055085	transmembrane transport	29	7	36	989	ENSBGRG00000001621(AQP3),ENSBGRG00000006075(SNTA1),ENSBGRG00000008276(SLC25A25),ENSBGRG00000008364(ORAI1),ENSBGRG00000008663(SLC22A23),ENSBGRG00000009196(SLC35C1),ENSBGRG00000009694(KCNJ11),ENSBGRG00000009791(ABCC8),ENSBGRG00000010057(PEX16),ENSBGRG00000010740(SLC35F6),ENSBGRG00000011193(KCNA6),ENSBGRG00000012223(KCNC1),ENSBGRG00000012434(SLC7A10),ENSBGRG00000012878(JPH2),ENSBGRG00000012958(STAC2…	ENSBGRG00000004152(SLC28A3),ENSBGRG00000004551(CTTNBP2NL),ENSBGRG00000011115(SLC25A33),ENSBGRG00000015700(MFSD14B),ENSBGRG00000021648(ENPP1),ENSBGRG00000023218(TRPM3),ENSBGRG00000024796(ABCA10)	0.00836428	0.546507		ko04934	Cushing syndrome	Human Diseases	Endocrine and metabolic disease	3	2	5	134	0.149774	0.793336	ENSBGRG00000008364(ORAI1),ENSBGRG00000015740,ENSBGRG00000007727(CDKN2C)	ENSBGRG00000001555(GNAI3),ENSBGRG00000006944(LEF1)	http://www.kegg.jp/kegg-bin/show_pathway?map=map04934&multi_query=K04492+%23FFFFFF,green%0d%0aK06622+%23FFFFFF,red%0d%0aK05228+%23FFFFFF,red%0d%0aK16056+%23FFFFFF,red%0d%0aK04630+%23FFFFFF,green%0d%0a
BP	GO:0042474	middle ear morphogenesis	3	0	3	18	ENSBGRG00000006516(SIX2),ENSBGRG00000021840(OSR1),ENSBGRG00000022648(TSHZ1)	-	0.00862189	0.546507		ko05416	Viral myocarditis	Human Diseases	Cardiovascular disease	1	2	3	64	0.150062	0.793336	ENSBGRG00000019125	ENSBGRG00000019079,ENSBGRG00000020580(CASP3)	http://www.kegg.jp/kegg-bin/show_pathway?map=map05416&multi_query=K04006+%23FFFFFF,green%0d%0aK06752+%23FFFFFF,red%0d%0aK02187+%23FFFFFF,green%0d%0a
BP	GO:0002062	chondrocyte differentiation	4	2	6	77	ENSBGRG00000002743(RARG),ENSBGRG00000006516(SIX2),ENSBGRG00000009514(ADAMTS12),ENSBGRG00000021840(OSR1)	ENSBGRG00000000772(COMP),ENSBGRG00000024594(MEX3C)	0.0105239	0.546507		ko04920	Adipocytokine signaling pathway	Organismal Systems	Endocrine system	3	0	3	64	0.150062	0.793336	ENSBGRG00000015740,ENSBGRG00000013185(IRS1),ENSBGRG00000023169(CPT1C)	-	http://www.kegg.jp/kegg-bin/show_pathway?map=map04920&multi_query=K16172+%23FFFFFF,red%0d%0aK19524+%23FFFFFF,red%0d%0aK05228+%23FFFFFF,red%0d%0a
BP	GO:0042127	regulation of cell population proliferation	27	9	36	1006	ENSBGRG00000000399(CRLF1),ENSBGRG00000000549(ATG101),ENSBGRG00000002228(IGFBP5),ENSBGRG00000002480(SOX7),ENSBGRG00000002743(RARG),ENSBGRG00000003011(PODN),ENSBGRG00000006516(SIX2),ENSBGRG00000007158(SOX8),ENSBGRG00000007727(CDKN2C),ENSBGRG00000008928(VEGFC),ENSBGRG00000008978(PBXIP1),ENSBGRG00000009080(PYGO2),ENSBGRG00000010067(GDF11),ENSBGRG00000010704(VASH1),ENSBGRG00000010740(SLC35F6),ENSBGRG0…	ENSBGRG00000000772(COMP),ENSBGRG00000002139,ENSBGRG00000003576(KLB),ENSBGRG00000006944(LEF1),ENSBGRG00000011115(SLC25A33),ENSBGRG00000015132(RASSF5),ENSBGRG00000017005(MTBP),ENSBGRG00000017871(TNMD),ENSBGRG00000020580(CASP3)	0.0107672	0.546507		ko04924	Renin secretion	Organismal Systems	Endocrine system	2	1	3	64	0.150062	0.793336	ENSBGRG00000008364(ORAI1),ENSBGRG00000026296(ADORA1)	ENSBGRG00000001555(GNAI3)	http://www.kegg.jp/kegg-bin/show_pathway?map=map04924&multi_query=K04265+%23FFFFFF,red%0d%0aK04630+%23FFFFFF,green%0d%0aK16056+%23FFFFFF,red%0d%0a
BP	GO:0001886	endothelial cell morphogenesis	1	1	2	7	ENSBGRG00000025536(PLOD3)	ENSBGRG00000017871(TNMD)	0.0111971	0.546507		ko04960	Aldosterone-regulated sodium reabsorption	Organismal Systems	Excretory system	2	0	2	33	0.151423	0.793336	ENSBGRG00000018161(PRKCA),ENSBGRG00000013185(IRS1)	-	http://www.kegg.jp/kegg-bin/show_pathway?map=map04960&multi_query=K16172+%23FFFFFF,red%0d%0aK02677+%23FFFFFF,red%0d%0a
BP	GO:0030854	positive regulation of granulocyte differentiation	0	2	2	7	-	ENSBGRG00000006944(LEF1),ENSBGRG00000015582(EVI2B)	0.0111971	0.546507		ko00740	Riboflavin metabolism	Metabolism	Metabolism of cofactors and vitamins	0	1	1	8	0.155904	0.793336	-	ENSBGRG00000021648(ENPP1)	http://www.kegg.jp/kegg-bin/show_pathway?map=map00740&multi_query=K01513+%23FFFFFF,green%0d%0a
BP	GO:0072531	pyrimidine-containing compound transmembrane transport	0	2	2	7	-	ENSBGRG00000004152(SLC28A3),ENSBGRG00000011115(SLC25A33)	0.0111971	0.546507		ko01524	Platinum drug resistance	Human Diseases	Drug resistance: antineoplastic	0	3	3	66	0.160099	0.793336	-	ENSBGRG00000020580(CASP3),ENSBGRG00000020093,ENSBGRG00000002112(GSTM3)	http://www.kegg.jp/kegg-bin/show_pathway?map=map01524&multi_query=K00799+%23FFFFFF,green%0d%0aK02187+%23FFFFFF,green%0d%0a
BP	GO:1900452	regulation of long-term synaptic depression	2	0	2	7	ENSBGRG00000025509(KCNB1),ENSBGRG00000026296(ADORA1)	-	0.0111971	0.546507		ko04971	Gastric acid secretion	Organismal Systems	Digestive system	2	1	3	66	0.160099	0.793336	ENSBGRG00000010518(MYLK4),ENSBGRG00000018161(PRKCA)	ENSBGRG00000001555(GNAI3)	http://www.kegg.jp/kegg-bin/show_pathway?map=map04971&multi_query=K00907+%23FFFFFF,red%0d%0aK02677+%23FFFFFF,red%0d%0aK04630+%23FFFFFF,green%0d%0a
BP	GO:0035295	tube development	22	6	28	738	ENSBGRG00000000399(CRLF1),ENSBGRG00000002228(IGFBP5),ENSBGRG00000002249(DZIP1L),ENSBGRG00000002743(RARG),ENSBGRG00000006516(SIX2),ENSBGRG00000007158(SOX8),ENSBGRG00000008928(VEGFC),ENSBGRG00000009361(STAB1),ENSBGRG00000009514(ADAMTS12),ENSBGRG00000010067(GDF11),ENSBGRG00000010704(VASH1),ENSBGRG00000010797(FKBP10),ENSBGRG00000012069(EMILIN1),ENSBGRG00000013522(LGR5),ENSBGRG00000018161(PRKCA),ENSBG…	ENSBGRG00000000772(COMP),ENSBGRG00000006944(LEF1),ENSBGRG00000016750(TIPARP),ENSBGRG00000017871(TNMD),ENSBGRG00000020580(CASP3),ENSBGRG00000025440(SERPINE1)	0.01156	0.546507		ko04071	Sphingolipid signaling pathway	Environmental Information Processing	Signal transduction	3	1	4	101	0.161436	0.793336	ENSBGRG00000018161(PRKCA),ENSBGRG00000026296(ADORA1),ENSBGRG00000000977(CERS1)	ENSBGRG00000001555(GNAI3)	http://www.kegg.jp/kegg-bin/show_pathway?map=map04071&multi_query=K02677+%23FFFFFF,red%0d%0aK04265+%23FFFFFF,red%0d%0aK04630+%23FFFFFF,green%0d%0aK04710+%23FFFFFF,red%0d%0a
BP	GO:0003416	endochondral bone growth	2	1	3	20	ENSBGRG00000002743(RARG),ENSBGRG00000011517(EVC)	ENSBGRG00000000772(COMP)	0.011626	0.546507		ko05340	Primary immunodeficiency	Human Diseases	Immune disease	1	1	2	35	0.166217	0.793336	ENSBGRG00000008364(ORAI1)	ENSBGRG00000000298(CD4)	http://www.kegg.jp/kegg-bin/show_pathway?map=map05340&multi_query=K16056+%23FFFFFF,red%0d%0aK06454+%23FFFFFF,green%0d%0a
BP	GO:0090278	negative regulation of peptide hormone secretion	3	0	3	20	ENSBGRG00000009694(KCNJ11),ENSBGRG00000013185(IRS1),ENSBGRG00000025509(KCNB1)	-	0.011626	0.546507		ko04650	Natural killer cell mediated cytotoxicity	Organismal Systems	Immune system	1	3	4	103	0.169547	0.793336	ENSBGRG00000018161(PRKCA)	ENSBGRG00000015947,ENSBGRG00000000308(CD48),ENSBGRG00000020580(CASP3)	http://www.kegg.jp/kegg-bin/show_pathway?map=map04650&multi_query=K02677+%23FFFFFF,red%0d%0aK07986+%23FFFFFF,green%0d%0aK06479+%23FFFFFF,green%0d%0aK02187+%23FFFFFF,green%0d%0a
BP	GO:0045668	negative regulation of osteoblast differentiation	4	0	4	37	ENSBGRG00000002228(IGFBP5),ENSBGRG00000004562(ID3),ENSBGRG00000008928(VEGFC),ENSBGRG00000023703(HDAC7)	-	0.0116447	0.546507		ko04540	Gap junction	Cellular Processes	Cellular community - eukaryotes	2	1	3	68	0.170336	0.793336	ENSBGRG00000020868(HTR2A),ENSBGRG00000018161(PRKCA)	ENSBGRG00000001555(GNAI3)	http://www.kegg.jp/kegg-bin/show_pathway?map=map04540&multi_query=K04630+%23FFFFFF,green%0d%0aK04157+%23FFFFFF,red%0d%0aK02677+%23FFFFFF,red%0d%0a
BP	GO:0035987	endodermal cell differentiation	3	1	4	38	ENSBGRG00000005255(COL5A1),ENSBGRG00000014725(MMP15),ENSBGRG00000023889(MMP2)	ENSBGRG00000009561(COL11A1)	0.0127736	0.546507		ko00513	Various types of N-glycan biosynthesis	Metabolism	Glycan biosynthesis and metabolism	2	0	2	36	0.173706	0.793336	ENSBGRG00000012759(MGAT1),ENSBGRG00000008221(MAN2A2)	-	http://www.kegg.jp/kegg-bin/show_pathway?map=map00513&multi_query=K01231+%23FFFFFF,red%0d%0aK00726+%23FFFFFF,red%0d%0a
BP	GO:0009888	tissue development	32	11	43	1271	ENSBGRG00000000399(CRLF1),ENSBGRG00000000934(ADAMTSL4),ENSBGRG00000001095(SH3BP1),ENSBGRG00000002228(IGFBP5),ENSBGRG00000002249(DZIP1L),ENSBGRG00000002480(SOX7),ENSBGRG00000002743(RARG),ENSBGRG00000004562(ID3),ENSBGRG00000005255(COL5A1),ENSBGRG00000005556(VAMP5),ENSBGRG00000006516(SIX2),ENSBGRG00000007158(SOX8),ENSBGRG00000008276(SLC25A25),ENSBGRG00000008364(ORAI1),ENSBGRG00000008534(PEF1),ENSBGR…	ENSBGRG00000000772(COMP),ENSBGRG00000001644(SNX10),ENSBGRG00000006944(LEF1),ENSBGRG00000007052(NTN4),ENSBGRG00000009561(COL11A1),ENSBGRG00000016750(TIPARP),ENSBGRG00000017871(TNMD),ENSBGRG00000020580(CASP3),ENSBGRG00000021648(ENPP1),ENSBGRG00000024594(MEX3C),ENSBGRG00000025440(SERPINE1)	0.0138766	0.546507		ko04022	cGMP-PKG signaling pathway	Environmental Information Processing	Signal transduction	4	1	5	142	0.177059	0.793336	ENSBGRG00000010518(MYLK4),ENSBGRG00000026296(ADORA1),ENSBGRG00000025371(ATP2B2),ENSBGRG00000013185(IRS1)	ENSBGRG00000001555(GNAI3)	http://www.kegg.jp/kegg-bin/show_pathway?map=map04022&multi_query=K05850+%23FFFFFF,red%0d%0aK00907+%23FFFFFF,red%0d%0aK16172+%23FFFFFF,red%0d%0aK04630+%23FFFFFF,green%0d%0aK04265+%23FFFFFF,red%0d%0a
BP	GO:0007369	gastrulation	6	2	8	132	ENSBGRG00000002480(SOX7),ENSBGRG00000005255(COL5A1),ENSBGRG00000006516(SIX2),ENSBGRG00000014725(MMP15),ENSBGRG00000021840(OSR1),ENSBGRG00000023889(MMP2)	ENSBGRG00000006944(LEF1),ENSBGRG00000009561(COL11A1)	0.0144924	0.546507		ko04115	p53 signaling pathway	Cellular Processes	Cell growth and death	1	2	3	70	0.180757	0.793336	ENSBGRG00000024889(CD82)	ENSBGRG00000025440(SERPINE1),ENSBGRG00000020580(CASP3)	http://www.kegg.jp/kegg-bin/show_pathway?map=map04115&multi_query=K03982+%23FFFFFF,green%0d%0aK06509+%23FFFFFF,red%0d%0aK02187+%23FFFFFF,green%0d%0a
BP	GO:0090150	establishment of protein localization to membrane	6	2	8	132	ENSBGRG00000005556(VAMP5),ENSBGRG00000010057(PEX16),ENSBGRG00000010087(NSG1),ENSBGRG00000012924(STX3),ENSBGRG00000015628(EMC9),ENSBGRG00000025509(KCNB1)	ENSBGRG00000001715(CAMLG),ENSBGRG00000003715(RAB8B)	0.0144924	0.546507		ko05204	Chemical carcinogenesis - DNA adducts	Human Diseases	Cancer: overview	0	2	2	37	0.181249	0.793336	-	ENSBGRG00000020093,ENSBGRG00000002112(GSTM3)	http://www.kegg.jp/kegg-bin/show_pathway?map=map05204&multi_query=K00799+%23FFFFFF,green%0d%0a
BP	GO:0006958	complement activation, classical pathway	2	0	2	8	ENSBGRG00000003422(C1QA),ENSBGRG00000003430(C1QC)	-	0.0146938	0.546507		ko05321	Inflammatory bowel disease	Human Diseases	Immune disease	1	2	3	71	0.186032	0.797142	ENSBGRG00000019125	ENSBGRG00000009248(IL12RB2),ENSBGRG00000001762(STAT4)	http://www.kegg.jp/kegg-bin/show_pathway?map=map05321&multi_query=K05064+%23FFFFFF,green%0d%0aK11222+%23FFFFFF,green%0d%0aK06752+%23FFFFFF,red%0d%0a
BP	GO:0017185	peptidyl-lysine hydroxylation	2	0	2	8	ENSBGRG00000010797(FKBP10),ENSBGRG00000025536(PLOD3)	-	0.0146938	0.546507		ko03320	PPAR signaling pathway	Organismal Systems	Endocrine system	3	0	3	72	0.191347	0.797142	ENSBGRG00000023169(CPT1C),ENSBGRG00000025096(ANGPTL4),ENSBGRG00000019666(PLTP)	-	http://www.kegg.jp/kegg-bin/show_pathway?map=map03320&multi_query=K19524+%23FFFFFF,red%0d%0aK08761+%23FFFFFF,red%0d%0aK08767+%23FFFFFF,red%0d%0a
BP	GO:0035239	tube morphogenesis	17	6	23	588	ENSBGRG00000002743(RARG),ENSBGRG00000006516(SIX2),ENSBGRG00000007158(SOX8),ENSBGRG00000008928(VEGFC),ENSBGRG00000009361(STAB1),ENSBGRG00000009514(ADAMTS12),ENSBGRG00000010704(VASH1),ENSBGRG00000010797(FKBP10),ENSBGRG00000012069(EMILIN1),ENSBGRG00000013522(LGR5),ENSBGRG00000018161(PRKCA),ENSBGRG00000021566(PKHD1),ENSBGRG00000021840(OSR1),ENSBGRG00000023703(HDAC7),ENSBGRG00000025096(ANGPTL4),ENSBGR…	ENSBGRG00000000772(COMP),ENSBGRG00000006944(LEF1),ENSBGRG00000016750(TIPARP),ENSBGRG00000017871(TNMD),ENSBGRG00000020580(CASP3),ENSBGRG00000025440(SERPINE1)	0.0152871	0.546507		ko05225	Hepatocellular carcinoma	Human Diseases	Cancer: specific types	1	4	5	146	0.191368	0.797142	ENSBGRG00000018161(PRKCA)	ENSBGRG00000016563,ENSBGRG00000020093,ENSBGRG00000002112(GSTM3),ENSBGRG00000006944(LEF1)	http://www.kegg.jp/kegg-bin/show_pathway?map=map05225&multi_query=K02677+%23FFFFFF,red%0d%0aK08957+%23FFFFFF,green%0d%0aK00799+%23FFFFFF,green%0d%0aK04492+%23FFFFFF,green%0d%0a
BP	GO:0030168	platelet activation	4	1	5	61	ENSBGRG00000007398(PEAR1),ENSBGRG00000012398(P2RY1),ENSBGRG00000018161(PRKCA),ENSBGRG00000019832(C1QTNF1)	ENSBGRG00000000772(COMP)	0.0155238	0.546507		ko04310	Wnt signaling pathway	Environmental Information Processing	Signal transduction	3	2	5	147	0.195009	0.797142	ENSBGRG00000018161(PRKCA),ENSBGRG00000025121(SERPINF1),ENSBGRG00000013522(LGR5)	ENSBGRG00000016563,ENSBGRG00000006944(LEF1)	http://www.kegg.jp/kegg-bin/show_pathway?map=map04310&multi_query=K08957+%23FFFFFF,green%0d%0aK04492+%23FFFFFF,green%0d%0aK02677+%23FFFFFF,red%0d%0aK19614+%23FFFFFF,red%0d%0aK04308+%23FFFFFF,red%0d%0a
BP	GO:0043255	regulation of carbohydrate biosynthetic process	3	2	5	61	ENSBGRG00000010063(C1QTNF3),ENSBGRG00000013185(IRS1),ENSBGRG00000020745(PGP)	ENSBGRG00000012579(FOXO1),ENSBGRG00000021648(ENPP1)	0.0155238	0.546507		ko05164	Influenza A	Human Diseases	Infectious disease: viral	3	2	5	148	0.198675	0.797142	ENSBGRG00000019125,ENSBGRG00000018161(PRKCA),ENSBGRG00000026590	ENSBGRG00000022186(NXT2),ENSBGRG00000020580(CASP3)	http://www.kegg.jp/kegg-bin/show_pathway?map=map05164&multi_query=K02187+%23FFFFFF,green%0d%0aK14285+%23FFFFFF,green%0d%0aK02677+%23FFFFFF,red%0d%0aK01340+%23FFFFFF,red%0d%0aK06752+%23FFFFFF,red%0d%0a
BP	GO:0016525	negative regulation of angiogenesis	4	2	6	84	ENSBGRG00000009361(STAB1),ENSBGRG00000010704(VASH1),ENSBGRG00000012069(EMILIN1),ENSBGRG00000025121(SERPINF1)	ENSBGRG00000017871(TNMD),ENSBGRG00000025440(SERPINE1)	0.0157075	0.546507		ko05200	Pathways in cancer	Human Diseases	Cancer: overview	4	9	13	478	0.201322	0.797142	ENSBGRG00000023889(MMP2),ENSBGRG00000013000(NOS2),ENSBGRG00000018161(PRKCA),ENSBGRG00000008928(VEGFC)	ENSBGRG00000020093,ENSBGRG00000020580(CASP3),ENSBGRG00000001555(GNAI3),ENSBGRG00000012579(FOXO1),ENSBGRG00000006944(LEF1),ENSBGRG00000009248(IL12RB2),ENSBGRG00000015132(RASSF5),ENSBGRG00000002112(GSTM3),ENSBGRG00000001762(STAT4)	http://www.kegg.jp/kegg-bin/show_pathway?map=map05200&multi_query=K11222+%23FFFFFF,green%0d%0aK00799+%23FFFFFF,green%0d%0aK05064+%23FFFFFF,green%0d%0aK07201+%23FFFFFF,green%0d%0aK05449+%23FFFFFF,red%0d%0aK02677+%23FFFFFF,red%0d%0aK13241+%23FFFFFF,red%0d%0aK08015+%23FFFFFF,green%0d%0aK04492+%23FFFFFF,green%0d%0aK02187+%23FFFFFF,green%0d%0aK01398+%23FFFFFF,red%0d%0aK04630+%23FFFFFF,green%0d%0a
BP	GO:0051216	cartilage development	6	2	8	135	ENSBGRG00000002743(RARG),ENSBGRG00000006516(SIX2),ENSBGRG00000008978(PBXIP1),ENSBGRG00000009514(ADAMTS12),ENSBGRG00000009629(BMP1),ENSBGRG00000021840(OSR1)	ENSBGRG00000000772(COMP),ENSBGRG00000024594(MEX3C)	0.0163983	0.546507		ko04728	Dopaminergic synapse	Organismal Systems	Nervous system	2	2	4	111	0.203334	0.797142	ENSBGRG00000010476(GRIA3),ENSBGRG00000018161(PRKCA)	ENSBGRG00000001555(GNAI3),ENSBGRG00000021516(GNAO1)	http://www.kegg.jp/kegg-bin/show_pathway?map=map04728&multi_query=K04630+%23FFFFFF,green%0d%0aK02677+%23FFFFFF,red%0d%0aK05199+%23FFFFFF,red%0d%0aK04534+%23FFFFFF,green%0d%0a
BP	GO:1901264	carbohydrate derivative transport	4	1	5	62	ENSBGRG00000009196(SLC35C1),ENSBGRG00000018757(SLC37A1),ENSBGRG00000019666(PLTP),ENSBGRG00000026296(ADORA1)	ENSBGRG00000004152(SLC28A3)	0.0165629	0.546507		ko00430	Taurine and hypotaurine metabolism	Metabolism	Metabolism of other amino acids	1	0	1	11	0.207922	0.797142	ENSBGRG00000024474(GADL1)	-	http://www.kegg.jp/kegg-bin/show_pathway?map=map00430&multi_query=K18966+%23FFFFFF,red%0d%0a
BP	GO:0002009	morphogenesis of an epithelium	13	3	16	368	ENSBGRG00000001095(SH3BP1),ENSBGRG00000002228(IGFBP5),ENSBGRG00000002743(RARG),ENSBGRG00000005255(COL5A1),ENSBGRG00000006516(SIX2),ENSBGRG00000007158(SOX8),ENSBGRG00000008928(VEGFC),ENSBGRG00000009514(ADAMTS12),ENSBGRG00000013522(LGR5),ENSBGRG00000021566(PKHD1),ENSBGRG00000021840(OSR1),ENSBGRG00000025536(PLOD3),ENSBGRG00000026803(SEMA4C)	ENSBGRG00000006944(LEF1),ENSBGRG00000007052(NTN4),ENSBGRG00000020580(CASP3)	0.0167058	0.546507		ko00982	Drug metabolism - cytochrome P450	Metabolism	Xenobiotics biodegradation and metabolism	0	2	2	41	0.211853	0.797142	-	ENSBGRG00000020093,ENSBGRG00000002112(GSTM3)	http://www.kegg.jp/kegg-bin/show_pathway?map=map00982&multi_query=K00799+%23FFFFFF,green%0d%0a
BP	GO:0002063	chondrocyte development	1	2	3	23	ENSBGRG00000002743(RARG)	ENSBGRG00000000772(COMP),ENSBGRG00000024594(MEX3C)	0.0171292	0.546507		ko04911	Insulin secretion	Organismal Systems	Endocrine system	3	0	3	76	0.212972	0.797142	ENSBGRG00000018161(PRKCA),ENSBGRG00000009791(ABCC8),ENSBGRG00000009694(KCNJ11)	-	http://www.kegg.jp/kegg-bin/show_pathway?map=map04911&multi_query=K02677+%23FFFFFF,red%0d%0aK05004+%23FFFFFF,red%0d%0aK05032+%23FFFFFF,red%0d%0a
BP	GO:0048009	insulin-like growth factor receptor signaling pathway	3	0	3	23	ENSBGRG00000002228(IGFBP5),ENSBGRG00000013185(IRS1),ENSBGRG00000025584(CILP)	-	0.0171292	0.546507		ko04015	Rap1 signaling pathway	Environmental Information Processing	Signal transduction	3	3	6	193	0.218062	0.797142	ENSBGRG00000008928(VEGFC),ENSBGRG00000012398(P2RY1),ENSBGRG00000018161(PRKCA)	ENSBGRG00000015132(RASSF5),ENSBGRG00000001555(GNAI3),ENSBGRG00000021516(GNAO1)	http://www.kegg.jp/kegg-bin/show_pathway?map=map04015&multi_query=K02677+%23FFFFFF,red%0d%0aK08015+%23FFFFFF,green%0d%0aK05449+%23FFFFFF,red%0d%0aK04534+%23FFFFFF,green%0d%0aK04630+%23FFFFFF,green%0d%0aK04270+%23FFFFFF,red%0d%0a
BP	GO:0098868	bone growth	2	1	3	23	ENSBGRG00000002743(RARG),ENSBGRG00000011517(EVC)	ENSBGRG00000000772(COMP)	0.0171292	0.546507		ko00980	Metabolism of xenobiotics by cytochrome P450	Metabolism	Xenobiotics biodegradation and metabolism	0	2	2	42	0.219587	0.797142	-	ENSBGRG00000002112(GSTM3),ENSBGRG00000020093	http://www.kegg.jp/kegg-bin/show_pathway?map=map00980&multi_query=K00799+%23FFFFFF,green%0d%0a
BP	GO:2000181	negative regulation of blood vessel morphogenesis	4	2	6	86	ENSBGRG00000009361(STAB1),ENSBGRG00000010704(VASH1),ENSBGRG00000012069(EMILIN1),ENSBGRG00000025121(SERPINF1)	ENSBGRG00000017871(TNMD),ENSBGRG00000025440(SERPINE1)	0.0174644	0.546507		ko04371	Apelin signaling pathway	Environmental Information Processing	Signal transduction	2	2	4	115	0.220931	0.797142	ENSBGRG00000013000(NOS2),ENSBGRG00000010518(MYLK4)	ENSBGRG00000025440(SERPINE1),ENSBGRG00000001555(GNAI3)	http://www.kegg.jp/kegg-bin/show_pathway?map=map04371&multi_query=K04630+%23FFFFFF,green%0d%0aK00907+%23FFFFFF,red%0d%0aK03982+%23FFFFFF,green%0d%0aK13241+%23FFFFFF,red%0d%0a
BP	GO:0007492	endoderm development	4	1	5	63	ENSBGRG00000002480(SOX7),ENSBGRG00000005255(COL5A1),ENSBGRG00000014725(MMP15),ENSBGRG00000023889(MMP2)	ENSBGRG00000009561(COL11A1)	0.0176472	0.546507		ko04961	Endocrine and other factor-regulated calcium reabsorption	Organismal Systems	Excretory system	2	0	2	43	0.227345	0.806358	ENSBGRG00000018161(PRKCA),ENSBGRG00000025371(ATP2B2)	-	http://www.kegg.jp/kegg-bin/show_pathway?map=map04961&multi_query=K05850+%23FFFFFF,red%0d%0aK02677+%23FFFFFF,red%0d%0a
BP	GO:0060324	face development	2	2	4	42	ENSBGRG00000002743(RARG),ENSBGRG00000023889(MMP2)	ENSBGRG00000006944(LEF1),ENSBGRG00000016750(TIPARP)	0.0179769	0.546507		ko04727	GABAergic synapse	Organismal Systems	Nervous system	1	2	3	79	0.229525	0.806358	ENSBGRG00000018161(PRKCA)	ENSBGRG00000001555(GNAI3),ENSBGRG00000021516(GNAO1)	http://www.kegg.jp/kegg-bin/show_pathway?map=map04727&multi_query=K04534+%23FFFFFF,green%0d%0aK02677+%23FFFFFF,red%0d%0aK04630+%23FFFFFF,green%0d%0a
BP	GO:0006109	regulation of carbohydrate metabolic process	5	2	7	112	ENSBGRG00000010063(C1QTNF3),ENSBGRG00000013185(IRS1),ENSBGRG00000019832(C1QTNF1),ENSBGRG00000020745(PGP),ENSBGRG00000020868(HTR2A)	ENSBGRG00000012579(FOXO1),ENSBGRG00000021648(ENPP1)	0.0185225	0.546507		ko04979	Cholesterol metabolism	Organismal Systems	Digestive system	2	0	2	44	0.235123	0.815296	ENSBGRG00000025096(ANGPTL4),ENSBGRG00000019666(PLTP)	-	http://www.kegg.jp/kegg-bin/show_pathway?map=map04979&multi_query=K08767+%23FFFFFF,red%0d%0aK08761+%23FFFFFF,red%0d%0a
BP	GO:0006013	mannose metabolic process	2	0	2	9	ENSBGRG00000008221(MAN2A2),ENSBGRG00000025209(MPI)	-	0.0185942	0.546507		ko04915	Estrogen signaling pathway	Organismal Systems	Endocrine system	2	2	4	120	0.243469	0.825889	ENSBGRG00000023889(MMP2),ENSBGRG00000015740	ENSBGRG00000001555(GNAI3),ENSBGRG00000021516(GNAO1)	http://www.kegg.jp/kegg-bin/show_pathway?map=map04915&multi_query=K05228+%23FFFFFF,red%0d%0aK04630+%23FFFFFF,green%0d%0aK01398+%23FFFFFF,red%0d%0aK04534+%23FFFFFF,green%0d%0a
BP	GO:0016322	neuron remodeling	1	1	2	9	ENSBGRG00000003422(C1QA)	ENSBGRG00000007052(NTN4)	0.0185942	0.546507		ko04613	Neutrophil extracellular trap formation	Organismal Systems	Immune system	5	0	5	160	0.244364	0.825889	ENSBGRG00000016458,ENSBGRG00000016242,ENSBGRG00000015411,ENSBGRG00000023703(HDAC7),ENSBGRG00000018161(PRKCA)	-	http://www.kegg.jp/kegg-bin/show_pathway?map=map04613&multi_query=K11252+%23FFFFFF,red%0d%0aK02677+%23FFFFFF,red%0d%0aK11253+%23FFFFFF,red%0d%0aK11408+%23FFFFFF,red%0d%0a
BP	GO:0017014	protein nitrosylation	2	0	2	9	ENSBGRG00000006075(SNTA1),ENSBGRG00000013000(NOS2)	-	0.0185942	0.546507		ko00510	N-Glycan biosynthesis	Metabolism	Glycan biosynthesis and metabolism	2	0	2	46	0.250719	0.836776	ENSBGRG00000008221(MAN2A2),ENSBGRG00000012759(MGAT1)	-	http://www.kegg.jp/kegg-bin/show_pathway?map=map00510&multi_query=K01231+%23FFFFFF,red%0d%0aK00726+%23FFFFFF,red%0d%0a
BP	GO:0018119	peptidyl-cysteine S-nitrosylation	2	0	2	9	ENSBGRG00000006075(SNTA1),ENSBGRG00000013000(NOS2)	-	0.0185942	0.546507		ko00604	Glycosphingolipid biosynthesis - ganglio series	Metabolism	Glycan biosynthesis and metabolism	1	0	1	14	0.256754	0.846337	ENSBGRG00000007556(ST6GALNAC6)	-	http://www.kegg.jp/kegg-bin/show_pathway?map=map00604&multi_query=K03376+%23FFFFFF,red%0d%0a
BP	GO:0035563	positive regulation of chromatin binding	1	1	2	9	ENSBGRG00000009080(PYGO2)	ENSBGRG00000007330(PARP9)	0.0185942	0.546507		ko00330	Arginine and proline metabolism	Metabolism	Amino acid metabolism	1	1	2	48	0.266346	0.85636	ENSBGRG00000013000(NOS2)	ENSBGRG00000019283(AGMAT)	http://www.kegg.jp/kegg-bin/show_pathway?map=map00330&multi_query=K13241+%23FFFFFF,red%0d%0aK01480+%23FFFFFF,green%0d%0a
BP	GO:0098969	neurotransmitter receptor transport to postsynaptic membrane	2	0	2	9	ENSBGRG00000010087(NSG1),ENSBGRG00000012924(STX3)	-	0.0185942	0.546507		ko05146	Amoebiasis	Human Diseases	Infectious disease: parasitic	2	1	3	87	0.274683	0.85636	ENSBGRG00000018161(PRKCA),ENSBGRG00000013000(NOS2)	ENSBGRG00000020580(CASP3)	http://www.kegg.jp/kegg-bin/show_pathway?map=map05146&multi_query=K13241+%23FFFFFF,red%0d%0aK02187+%23FFFFFF,green%0d%0aK02677+%23FFFFFF,red%0d%0a
BP	GO:1903540	establishment of protein localization to postsynaptic membrane	2	0	2	9	ENSBGRG00000010087(NSG1),ENSBGRG00000012924(STX3)	-	0.0185942	0.546507		ko05150	Staphylococcus aureus infection	Human Diseases	Infectious disease: bacterial	3	0	3	87	0.274683	0.85636	ENSBGRG00000003422(C1QA),ENSBGRG00000019125,ENSBGRG00000003430(C1QC)	-	http://www.kegg.jp/kegg-bin/show_pathway?map=map05150&multi_query=K03986+%23FFFFFF,red%0d%0aK06752+%23FFFFFF,red%0d%0aK03988+%23FFFFFF,red%0d%0a
BP	GO:0007019	microtubule depolymerization	2	1	3	24	ENSBGRG00000007767(NAV3),ENSBGRG00000016460(KATNB1)	ENSBGRG00000017033(HDGFL3)	0.0192344	0.546507		ko04723	Retrograde endocannabinoid signaling	Organismal Systems	Nervous system	2	2	4	127	0.275831	0.85636	ENSBGRG00000018161(PRKCA),ENSBGRG00000010476(GRIA3)	ENSBGRG00000021516(GNAO1),ENSBGRG00000001555(GNAI3)	http://www.kegg.jp/kegg-bin/show_pathway?map=map04723&multi_query=K04630+%23FFFFFF,green%0d%0aK04534+%23FFFFFF,green%0d%0aK05199+%23FFFFFF,red%0d%0aK02677+%23FFFFFF,red%0d%0a
BP	GO:0031111	negative regulation of microtubule polymerization or depolymerization	2	1	3	24	ENSBGRG00000007767(NAV3),ENSBGRG00000016460(KATNB1)	ENSBGRG00000017033(HDGFL3)	0.0192344	0.546507		ko05017	Spinocerebellar ataxia	Human Diseases	Neurodegenerative disease	3	1	4	127	0.275831	0.85636	ENSBGRG00000010476(GRIA3),ENSBGRG00000000549(ATG101),ENSBGRG00000018161(PRKCA)	ENSBGRG00000019080(TBPL1)	http://www.kegg.jp/kegg-bin/show_pathway?map=map05017&multi_query=K19730+%23FFFFFF,red%0d%0aK05199+%23FFFFFF,red%0d%0aK02677+%23FFFFFF,red%0d%0aK03120+%23FFFFFF,green%0d%0a
BP	GO:0061005	cell differentiation involved in kidney development	4	0	4	43	ENSBGRG00000006516(SIX2),ENSBGRG00000009986(AMER1),ENSBGRG00000015957(GLIS2),ENSBGRG00000021840(OSR1)	-	0.0194553	0.546507		ko04340	Hedgehog signaling pathway	Environmental Information Processing	Signal transduction	1	1	2	52	0.297574	0.903008	ENSBGRG00000011517(EVC)	ENSBGRG00000016563	http://www.kegg.jp/kegg-bin/show_pathway?map=map04340&multi_query=K19605+%23FFFFFF,red%0d%0aK08957+%23FFFFFF,green%0d%0a
BP	GO:0042476	odontogenesis	3	3	6	89	ENSBGRG00000001621(AQP3),ENSBGRG00000004562(ID3),ENSBGRG00000021840(OSR1)	ENSBGRG00000001644(SNX10),ENSBGRG00000006944(LEF1),ENSBGRG00000025440(SERPINE1)	0.0203457	0.546507		ko04640	Hematopoietic cell lineage	Organismal Systems	Immune system	1	2	3	91	0.297621	0.903008	ENSBGRG00000019125	ENSBGRG00000000298(CD4),ENSBGRG00000019079	http://www.kegg.jp/kegg-bin/show_pathway?map=map04640&multi_query=K04006+%23FFFFFF,green%0d%0aK06752+%23FFFFFF,red%0d%0aK06454+%23FFFFFF,green%0d%0a
BP	GO:0014074	response to purine-containing compound	4	1	5	66	ENSBGRG00000002228(IGFBP5),ENSBGRG00000009694(KCNJ11),ENSBGRG00000012398(P2RY1),ENSBGRG00000026296(ADORA1)	ENSBGRG00000021648(ENPP1)	0.0211784	0.546507		ko00061	Fatty acid biosynthesis	Metabolism	Lipid metabolism	1	0	1	17	0.302594	0.907782	ENSBGRG00000014312(MCAT)	-	http://www.kegg.jp/kegg-bin/show_pathway?map=map00061&multi_query=K00645+%23FFFFFF,red%0d%0a
BP	GO:0060325	face morphogenesis	1	2	3	25	ENSBGRG00000023889(MMP2)	ENSBGRG00000006944(LEF1),ENSBGRG00000016750(TIPARP)	0.0214762	0.546507		ko04928	Parathyroid hormone synthesis, secretion and action	Organismal Systems	Endocrine system	2	1	3	93	0.309137	0.91164	ENSBGRG00000014725(MMP15),ENSBGRG00000018161(PRKCA)	ENSBGRG00000001555(GNAI3)	http://www.kegg.jp/kegg-bin/show_pathway?map=map04928&multi_query=K04630+%23FFFFFF,green%0d%0aK07995+%23FFFFFF,red%0d%0aK02677+%23FFFFFF,red%0d%0a
BP	GO:0000226	microtubule cytoskeleton organization	11	6	17	411	ENSBGRG00000002838(SUN2),ENSBGRG00000003400(KIF20A),ENSBGRG00000007157(CCDC69),ENSBGRG00000007767(NAV3),ENSBGRG00000014069,ENSBGRG00000016460(KATNB1),ENSBGRG00000016981(KIFC1),ENSBGRG00000018249(CCDC8),ENSBGRG00000018601(OBSL1),ENSBGRG00000021566(PKHD1),ENSBGRG00000025913(MAP1S)	ENSBGRG00000001376(DNAH7),ENSBGRG00000015070(MAP7),ENSBGRG00000016378(HEPACAM2),ENSBGRG00000017033(HDGFL3),ENSBGRG00000018062(DNAH5),ENSBGRG00000020150(ULK4)	0.0214921	0.546507		ko00983	Drug metabolism - other enzymes	Metabolism	Xenobiotics biodegradation and metabolism	0	2	2	54	0.313125	0.91164	-	ENSBGRG00000002112(GSTM3),ENSBGRG00000020093	http://www.kegg.jp/kegg-bin/show_pathway?map=map00983&multi_query=K00799+%23FFFFFF,green%0d%0a
BP	GO:0001656	metanephros development	5	0	5	67	ENSBGRG00000004562(ID3),ENSBGRG00000006516(SIX2),ENSBGRG00000007158(SOX8),ENSBGRG00000010067(GDF11),ENSBGRG00000021840(OSR1)	-	0.0224505	0.546507		ko04929	GnRH secretion	Organismal Systems	Endocrine system	2	0	2	55	0.320874	0.91164	ENSBGRG00000009694(KCNJ11),ENSBGRG00000018161(PRKCA)	-	http://www.kegg.jp/kegg-bin/show_pathway?map=map04929&multi_query=K05004+%23FFFFFF,red%0d%0aK02677+%23FFFFFF,red%0d%0a
BP	GO:0034109	homotypic cell-cell adhesion	3	1	4	45	ENSBGRG00000007398(PEAR1),ENSBGRG00000018161(PRKCA),ENSBGRG00000019832(C1QTNF1)	ENSBGRG00000000772(COMP)	0.0226318	0.546507		ko04510	Focal adhesion	Cellular Processes	Cellular community - eukaryotes	4	1	5	181	0.32969	0.91164	ENSBGRG00000018161(PRKCA),ENSBGRG00000008928(VEGFC),ENSBGRG00000010518(MYLK4),ENSBGRG00000000863(COL6A2)	ENSBGRG00000000772(COMP)	http://www.kegg.jp/kegg-bin/show_pathway?map=map04510&multi_query=K06238+%23FFFFFF,red%0d%0aK02677+%23FFFFFF,red%0d%0aK04659+%23FFFFFF,green%0d%0aK05449+%23FFFFFF,red%0d%0aK00907+%23FFFFFF,red%0d%0a
BP	GO:0000027	ribosomal large subunit assembly	2	0	2	10	ENSBGRG00000004243(MRTO4),ENSBGRG00000025223(NOP53)	-	0.0228772	0.546507		ko00220	Arginine biosynthesis	Metabolism	Amino acid metabolism	1	0	1	19	0.331582	0.91164	ENSBGRG00000013000(NOS2)	-	http://www.kegg.jp/kegg-bin/show_pathway?map=map00220&multi_query=K13241+%23FFFFFF,red%0d%0a
BP	GO:0021535	cell migration in hindbrain	1	1	2	10	ENSBGRG00000026803(SEMA4C)	ENSBGRG00000006944(LEF1)	0.0228772	0.546507		ko00531	Glycosaminoglycan degradation	Metabolism	Glycan biosynthesis and metabolism	1	0	1	19	0.331582	0.91164	ENSBGRG00000026887(GALNS)	-	http://www.kegg.jp/kegg-bin/show_pathway?map=map00531&multi_query=K01132+%23FFFFFF,red%0d%0a
BP	GO:0071492	cellular response to UV-A	2	0	2	10	ENSBGRG00000000977(CERS1),ENSBGRG00000023889(MMP2)	-	0.0228772	0.546507		ko04931	Insulin resistance	Human Diseases	Endocrine and metabolic disease	2	1	3	97	0.332209	0.91164	ENSBGRG00000024222(PPP1R3D),ENSBGRG00000013185(IRS1)	ENSBGRG00000012579(FOXO1)	http://www.kegg.jp/kegg-bin/show_pathway?map=map04931&multi_query=K07201+%23FFFFFF,green%0d%0aK16172+%23FFFFFF,red%0d%0aK07189+%23FFFFFF,red%0d%0a
BP	GO:0098877	neurotransmitter receptor transport to plasma membrane	2	0	2	10	ENSBGRG00000010087(NSG1),ENSBGRG00000012924(STX3)	-	0.0228772	0.546507		ko05031	Amphetamine addiction	Human Diseases	Substance dependence	2	0	2	57	0.336307	0.91164	ENSBGRG00000010476(GRIA3),ENSBGRG00000018161(PRKCA)	-	http://www.kegg.jp/kegg-bin/show_pathway?map=map05031&multi_query=K05199+%23FFFFFF,red%0d%0aK02677+%23FFFFFF,red%0d%0a
BP	GO:0010675	regulation of cellular carbohydrate metabolic process	4	2	6	92	ENSBGRG00000010063(C1QTNF3),ENSBGRG00000013185(IRS1),ENSBGRG00000019832(C1QTNF1),ENSBGRG00000020745(PGP)	ENSBGRG00000012579(FOXO1),ENSBGRG00000021648(ENPP1)	0.023534	0.546507		ko04927	Cortisol synthesis and secretion	Organismal Systems	Endocrine system	2	0	2	57	0.336307	0.91164	ENSBGRG00000015740,ENSBGRG00000008364(ORAI1)	-	http://www.kegg.jp/kegg-bin/show_pathway?map=map04927&multi_query=K05228+%23FFFFFF,red%0d%0aK16056+%23FFFFFF,red%0d%0a
BP	GO:0003116	regulation of vasoconstriction by norepinephrine	1	0	1	1	ENSBGRG00000006075(SNTA1)	-	0.0240705	0.546507		ko05202	Transcriptional misregulation in cancer	Human Diseases	Cancer: overview	4	1	5	183	0.338024	0.91164	ENSBGRG00000010476(GRIA3),ENSBGRG00000016242,ENSBGRG00000007727(CDKN2C),ENSBGRG00000015411	ENSBGRG00000012579(FOXO1)	http://www.kegg.jp/kegg-bin/show_pathway?map=map05202&multi_query=K07201+%23FFFFFF,green%0d%0aK06622+%23FFFFFF,red%0d%0aK05199+%23FFFFFF,red%0d%0aK11253+%23FFFFFF,red%0d%0a
BP	GO:0003117	regulation of vasoconstriction by circulating norepinephrine	1	0	1	1	ENSBGRG00000006075(SNTA1)	-	0.0240705	0.546507		ko04935	Growth hormone synthesis, secretion and action	Organismal Systems	Endocrine system	2	1	3	99	0.343743	0.91208	ENSBGRG00000018161(PRKCA),ENSBGRG00000013185(IRS1)	ENSBGRG00000001555(GNAI3)	http://www.kegg.jp/kegg-bin/show_pathway?map=map04935&multi_query=K04630+%23FFFFFF,green%0d%0aK02677+%23FFFFFF,red%0d%0aK16172+%23FFFFFF,red%0d%0a
BP	GO:0006049	UDP-N-acetylglucosamine catabolic process	1	0	1	1	ENSBGRG00000012759(MGAT1)	-	0.0240705	0.546507		ko04668	TNF signaling pathway	Environmental Information Processing	Signal transduction	1	2	3	101	0.355262	0.91208	ENSBGRG00000008928(VEGFC)	ENSBGRG00000014185,ENSBGRG00000020580(CASP3)	http://www.kegg.jp/kegg-bin/show_pathway?map=map04668&multi_query=K17072+%23FFFFFF,green%0d%0aK02187+%23FFFFFF,green%0d%0aK05449+%23FFFFFF,red%0d%0a
BP	GO:0009227	nucleotide-sugar catabolic process	1	0	1	1	ENSBGRG00000012759(MGAT1)	-	0.0240705	0.546507		ko05170	Human immunodeficiency virus 1 infection	Human Diseases	Infectious disease: viral	1	4	5	191	0.371501	0.91208	ENSBGRG00000018161(PRKCA)	ENSBGRG00000001555(GNAI3),ENSBGRG00000020580(CASP3),ENSBGRG00000000298(CD4),ENSBGRG00000021516(GNAO1)	http://www.kegg.jp/kegg-bin/show_pathway?map=map05170&multi_query=K02677+%23FFFFFF,red%0d%0aK04630+%23FFFFFF,green%0d%0aK02187+%23FFFFFF,green%0d%0aK06454+%23FFFFFF,green%0d%0aK04534+%23FFFFFF,green%0d%0a
BP	GO:0010189	vitamin E biosynthetic process	1	0	1	1	ENSBGRG00000019666(PLTP)	-	0.0240705	0.546507		ko03430	Mismatch repair	Genetic Information Processing	Replication and repair	1	0	1	22	0.372835	0.91208	ENSBGRG00000018673	-	http://www.kegg.jp/kegg-bin/show_pathway?map=map03430&multi_query=K03505+%23FFFFFF,red%0d%0a
BP	GO:0015783	GDP-fucose transmembrane transport	1	0	1	1	ENSBGRG00000009196(SLC35C1)	-	0.0240705	0.546507		ko04745	Phototransduction - fly	Organismal Systems	Sensory system	1	0	1	22	0.372835	0.91208	ENSBGRG00000018161(PRKCA)	-	http://www.kegg.jp/kegg-bin/show_pathway?map=map04745&multi_query=K02677+%23FFFFFF,red%0d%0a
BP	GO:0016557	peroxisome membrane biogenesis	1	0	1	1	ENSBGRG00000010057(PEX16)	-	0.0240705	0.546507		ko05022	Pathways of neurodegeneration - multiple diseases	Human Diseases	Neurodegenerative disease	5	5	10	421	0.387966	0.91208	ENSBGRG00000000549(ATG101),ENSBGRG00000010476(GRIA3),ENSBGRG00000003388(GPX7),ENSBGRG00000013000(NOS2),ENSBGRG00000018161(PRKCA)	ENSBGRG00000020580(CASP3),ENSBGRG00000006702(GPX3),ENSBGRG00000016563,ENSBGRG00000018062(DNAH5),ENSBGRG00000001376(DNAH7)	http://www.kegg.jp/kegg-bin/show_pathway?map=map05022&multi_query=K19730+%23FFFFFF,red%0d%0aK02677+%23FFFFFF,red%0d%0aK02187+%23FFFFFF,green%0d%0aK00432+%23FFFFFF,purple%0d%0aK13241+%23FFFFFF,red%0d%0aK05199+%23FFFFFF,red%0d%0aK08957+%23FFFFFF,green%0d%0aK10408+%23FFFFFF,green%0d%0a
BP	GO:0018916	nitrobenzene metabolic process	0	1	1	1	-	ENSBGRG00000002112(GSTM3)	0.0240705	0.546507		ko05223	Non-small cell lung cancer	Human Diseases	Cancer: specific types	1	1	2	64	0.389395	0.91208	ENSBGRG00000018161(PRKCA)	ENSBGRG00000015132(RASSF5)	http://www.kegg.jp/kegg-bin/show_pathway?map=map05223&multi_query=K08015+%23FFFFFF,green%0d%0aK02677+%23FFFFFF,red%0d%0a
BP	GO:0021512	spinal cord anterior/posterior patterning	1	0	1	1	ENSBGRG00000010067(GDF11)	-	0.0240705	0.546507		ko04152	AMPK signaling pathway	Environmental Information Processing	Signal transduction	2	1	3	108	0.395331	0.91208	ENSBGRG00000023169(CPT1C),ENSBGRG00000013185(IRS1)	ENSBGRG00000012579(FOXO1)	http://www.kegg.jp/kegg-bin/show_pathway?map=map04152&multi_query=K16172+%23FFFFFF,red%0d%0aK19524+%23FFFFFF,red%0d%0aK07201+%23FFFFFF,green%0d%0a
BP	GO:0030887	positive regulation of myeloid dendritic cell activation	0	1	1	1	-	ENSBGRG00000008883(CLEC4D)	0.0240705	0.546507		ko00650	Butanoate metabolism	Metabolism	Carbohydrate metabolism	1	0	1	24	0.398922	0.91208	ENSBGRG00000017686(ACSM5)	-	http://www.kegg.jp/kegg-bin/show_pathway?map=map00650&multi_query=K01896+%23FFFFFF,red%0d%0a
BP	GO:0031930	mitochondria-nucleus signaling pathway	0	1	1	1	-	ENSBGRG00000011115(SLC25A33)	0.0240705	0.546507		ko00030	Pentose phosphate pathway	Metabolism	Carbohydrate metabolism	1	0	1	24	0.398922	0.91208	ENSBGRG00000026388(ALDOA)	-	http://www.kegg.jp/kegg-bin/show_pathway?map=map00030&multi_query=K01623+%23FFFFFF,red%0d%0a
BP	GO:0032581	ER-dependent peroxisome organization	1	0	1	1	ENSBGRG00000010057(PEX16)	-	0.0240705	0.546507		ko05412	Arrhythmogenic right ventricular cardiomyopathy	Human Diseases	Cardiovascular disease	1	1	2	66	0.404232	0.91208	ENSBGRG00000017954(CACNG1)	ENSBGRG00000006944(LEF1)	http://www.kegg.jp/kegg-bin/show_pathway?map=map05412&multi_query=K04866+%23FFFFFF,red%0d%0aK04492+%23FFFFFF,green%0d%0a
BP	GO:0035397	helper T cell enhancement of adaptive immune response	0	1	1	1	-	ENSBGRG00000000298(CD4)	0.0240705	0.546507		ko05140	Leishmaniasis	Human Diseases	Infectious disease: parasitic	2	0	2	66	0.404232	0.91208	ENSBGRG00000019125,ENSBGRG00000013000(NOS2)	-	http://www.kegg.jp/kegg-bin/show_pathway?map=map05140&multi_query=K06752+%23FFFFFF,red%0d%0aK13241+%23FFFFFF,red%0d%0a
BP	GO:0035490	regulation of leukotriene production involved in inflammatory response	0	1	1	1	-	ENSBGRG00000025440(SERPINE1)	0.0240705	0.546507		ko04919	Thyroid hormone signaling pathway	Organismal Systems	Endocrine system	2	1	3	110	0.406673	0.91208	ENSBGRG00000000154(RCAN1),ENSBGRG00000018161(PRKCA)	ENSBGRG00000012579(FOXO1)	http://www.kegg.jp/kegg-bin/show_pathway?map=map04919&multi_query=K07201+%23FFFFFF,green%0d%0aK02677+%23FFFFFF,red%0d%0aK17901+%23FFFFFF,red%0d%0a
BP	GO:0035491	positive regulation of leukotriene production involved in inflammatory response	0	1	1	1	-	ENSBGRG00000025440(SERPINE1)	0.0240705	0.546507		ko05014	Amyotrophic lateral sclerosis	Human Diseases	Neurodegenerative disease	3	5	8	338	0.413847	0.91208	ENSBGRG00000013000(NOS2),ENSBGRG00000003388(GPX7),ENSBGRG00000000549(ATG101)	ENSBGRG00000001376(DNAH7),ENSBGRG00000022186(NXT2),ENSBGRG00000018062(DNAH5),ENSBGRG00000006702(GPX3),ENSBGRG00000020580(CASP3)	http://www.kegg.jp/kegg-bin/show_pathway?map=map05014&multi_query=K00432+%23FFFFFF,purple%0d%0aK13241+%23FFFFFF,red%0d%0aK19730+%23FFFFFF,red%0d%0aK02187+%23FFFFFF,green%0d%0aK10408+%23FFFFFF,green%0d%0aK14285+%23FFFFFF,green%0d%0a
BP	GO:0035780	CD80 biosynthetic process	1	0	1	1	ENSBGRG00000005603(TMEM106A)	-	0.0240705	0.546507		ko04068	FoxO signaling pathway	Environmental Information Processing	Signal transduction	2	1	3	114	0.429164	0.91208	ENSBGRG00000026571,ENSBGRG00000013185(IRS1)	ENSBGRG00000012579(FOXO1)	http://www.kegg.jp/kegg-bin/show_pathway?map=map04068&multi_query=K04564+%23FFFFFF,red%0d%0aK07201+%23FFFFFF,green%0d%0aK16172+%23FFFFFF,red%0d%0a
BP	GO:0036085	GDP-fucose import into Golgi lumen	1	0	1	1	ENSBGRG00000009196(SLC35C1)	-	0.0240705	0.546507		ko00563	Glycosylphosphatidylinositol (GPI)-anchor biosynthesis	Metabolism	Glycan biosynthesis and metabolism	1	0	1	27	0.436043	0.91208	ENSBGRG00000010913(GPAA1)	-	http://www.kegg.jp/kegg-bin/show_pathway?map=map00563&multi_query=K05289+%23FFFFFF,red%0d%0a
BP	GO:0036331	avascular cornea development in camera-type eye	0	1	1	1	-	ENSBGRG00000010987(ANGPTL7)	0.0240705	0.546507		ko04612	Antigen processing and presentation	Organismal Systems	Immune system	1	1	2	71	0.44055	0.91208	ENSBGRG00000019125	ENSBGRG00000000298(CD4)	http://www.kegg.jp/kegg-bin/show_pathway?map=map04612&multi_query=K06752+%23FFFFFF,red%0d%0aK06454+%23FFFFFF,green%0d%0a
BP	GO:0042941	D-alanine transport	1	0	1	1	ENSBGRG00000012434(SLC7A10)	-	0.0240705	0.546507		ko04912	GnRH signaling pathway	Organismal Systems	Endocrine system	2	0	2	72	0.44767	0.91208	ENSBGRG00000018161(PRKCA),ENSBGRG00000023889(MMP2)	-	http://www.kegg.jp/kegg-bin/show_pathway?map=map04912&multi_query=K02677+%23FFFFFF,red%0d%0aK01398+%23FFFFFF,red%0d%0a
BP	GO:0042942	D-serine transport	1	0	1	1	ENSBGRG00000012434(SLC7A10)	-	0.0240705	0.546507		ko00500	Starch and sucrose metabolism	Metabolism	Carbohydrate metabolism	0	1	1	28	0.447904	0.91208	-	ENSBGRG00000021648(ENPP1)	http://www.kegg.jp/kegg-bin/show_pathway?map=map00500&multi_query=K01513+%23FFFFFF,green%0d%0a
BP	GO:0043335	protein unfolding	1	0	1	1	ENSBGRG00000025096(ANGPTL4)	-	0.0240705	0.546507		ko05167	Kaposi sarcoma-associated herpesvirus infection	Human Diseases	Infectious disease: viral	2	2	4	164	0.451605	0.91208	ENSBGRG00000000821,ENSBGRG00000000154(RCAN1)	ENSBGRG00000006944(LEF1),ENSBGRG00000020580(CASP3)	http://www.kegg.jp/kegg-bin/show_pathway?map=map05167&multi_query=K21668+%23FFFFFF,red%0d%0aK04492+%23FFFFFF,green%0d%0aK17901+%23FFFFFF,red%0d%0aK02187+%23FFFFFF,green%0d%0a
BP	GO:0060668	regulation of branching involved in salivary gland morphogenesis by extracellular matrix-epithelial cell signaling	0	1	1	1	-	ENSBGRG00000007052(NTN4)	0.0240705	0.546507		ko03410	Base excision repair	Genetic Information Processing	Replication and repair	1	0	1	29	0.459517	0.91208	ENSBGRG00000018673	-	http://www.kegg.jp/kegg-bin/show_pathway?map=map03410&multi_query=K03505+%23FFFFFF,red%0d%0a
BP	GO:0061611	mannose to fructose-6-phosphate metabolic process	1	0	1	1	ENSBGRG00000025209(MPI)	-	0.0240705	0.546507		ko05207	Chemical carcinogenesis - receptor activation	Human Diseases	Cancer: overview	1	3	4	166	0.460904	0.91208	ENSBGRG00000018161(PRKCA)	ENSBGRG00000020093,ENSBGRG00000001555(GNAI3),ENSBGRG00000002112(GSTM3)	http://www.kegg.jp/kegg-bin/show_pathway?map=map05207&multi_query=K00799+%23FFFFFF,green%0d%0aK02677+%23FFFFFF,red%0d%0aK04630+%23FFFFFF,green%0d%0a
BP	GO:0070165	positive regulation of adiponectin secretion	1	0	1	1	ENSBGRG00000010063(C1QTNF3)	-	0.0240705	0.546507		ko03018	RNA degradation	Genetic Information Processing	Folding, sorting and degradation	1	1	2	74	0.461758	0.91208	ENSBGRG00000026260(ENO3)	ENSBGRG00000002139	http://www.kegg.jp/kegg-bin/show_pathway?map=map03018&multi_query=K01689+%23FFFFFF,red%0d%0aK14443+%23FFFFFF,green%0d%0a
BP	GO:0070285	pigment cell development	1	0	1	1	ENSBGRG00000000934(ADAMTSL4)	-	0.0240705	0.546507		ko04910	Insulin signaling pathway	Organismal Systems	Endocrine system	2	1	3	121	0.467766	0.91208	ENSBGRG00000024222(PPP1R3D),ENSBGRG00000013185(IRS1)	ENSBGRG00000012579(FOXO1)	http://www.kegg.jp/kegg-bin/show_pathway?map=map04910&multi_query=K16172+%23FFFFFF,red%0d%0aK07201+%23FFFFFF,green%0d%0aK07189+%23FFFFFF,red%0d%0a
BP	GO:0072165	anterior mesonephric tubule development	1	0	1	1	ENSBGRG00000021840(OSR1)	-	0.0240705	0.546507		ko00410	beta-Alanine metabolism	Metabolism	Metabolism of other amino acids	1	0	1	30	0.470887	0.91208	ENSBGRG00000024474(GADL1)	-	http://www.kegg.jp/kegg-bin/show_pathway?map=map00410&multi_query=K18966+%23FFFFFF,red%0d%0a
BP	GO:0072166	posterior mesonephric tubule development	1	0	1	1	ENSBGRG00000021840(OSR1)	-	0.0240705	0.546507		ko04136	Autophagy - other	Cellular Processes	Transport and catabolism	1	0	1	30	0.470887	0.91208	ENSBGRG00000000549(ATG101)	-	http://www.kegg.jp/kegg-bin/show_pathway?map=map04136&multi_query=K19730+%23FFFFFF,red%0d%0a
BP	GO:0072167	specification of mesonephric tubule identity	1	0	1	1	ENSBGRG00000021840(OSR1)	-	0.0240705	0.546507		ko03020	RNA polymerase	Genetic Information Processing	Transcription	1	0	1	30	0.470887	0.91208	ENSBGRG00000013230(POLR2E)	-	http://www.kegg.jp/kegg-bin/show_pathway?map=map03020&multi_query=K03013+%23FFFFFF,red%0d%0a
BP	GO:0072168	specification of anterior mesonephric tubule identity	1	0	1	1	ENSBGRG00000021840(OSR1)	-	0.0240705	0.546507		ko04142	Lysosome	Cellular Processes	Transport and catabolism	2	1	3	122	0.47319	0.91208	ENSBGRG00000026887(GALNS),ENSBGRG00000010420(NAGA)	ENSBGRG00000021575(CLN5)	http://www.kegg.jp/kegg-bin/show_pathway?map=map04142&multi_query=K01204+%23FFFFFF,red%0d%0aK01132+%23FFFFFF,red%0d%0aK12390+%23FFFFFF,green%0d%0a
BP	GO:0072169	specification of posterior mesonephric tubule identity	1	0	1	1	ENSBGRG00000021840(OSR1)	-	0.0240705	0.546507		ko04970	Salivary secretion	Organismal Systems	Digestive system	2	0	2	76	0.475635	0.91208	ENSBGRG00000025371(ATP2B2),ENSBGRG00000018161(PRKCA)	-	http://www.kegg.jp/kegg-bin/show_pathway?map=map04970&multi_query=K05850+%23FFFFFF,red%0d%0aK02677+%23FFFFFF,red%0d%0a
BP	GO:0072183	negative regulation of nephron tubule epithelial cell differentiation	1	0	1	1	ENSBGRG00000021840(OSR1)	-	0.0240705	0.546507		ko03008	Ribosome biogenesis in eukaryotes	Genetic Information Processing	Translation	1	1	2	76	0.475635	0.91208	ENSBGRG00000012277(RRP7A)	ENSBGRG00000022186(NXT2)	http://www.kegg.jp/kegg-bin/show_pathway?map=map03008&multi_query=K14545+%23FFFFFF,red%0d%0aK14285+%23FFFFFF,green%0d%0a
BP	GO:0072184	renal vesicle progenitor cell differentiation	1	0	1	1	ENSBGRG00000021840(OSR1)	-	0.0240705	0.546507		ko04710	Circadian rhythm	Organismal Systems	Environmental adaptation	1	0	1	31	0.482019	0.91208	ENSBGRG00000026121(BHLHE40)	-	http://www.kegg.jp/kegg-bin/show_pathway?map=map04710&multi_query=K03729+%23FFFFFF,red%0d%0a
BP	GO:0072185	metanephric cap development	1	0	1	1	ENSBGRG00000021840(OSR1)	-	0.0240705	0.546507		ko05143	African trypanosomiasis	Human Diseases	Infectious disease: parasitic	1	0	1	31	0.482019	0.91208	ENSBGRG00000018161(PRKCA)	-	http://www.kegg.jp/kegg-bin/show_pathway?map=map05143&multi_query=K02677+%23FFFFFF,red%0d%0a
BP	GO:0072186	metanephric cap morphogenesis	1	0	1	1	ENSBGRG00000021840(OSR1)	-	0.0240705	0.546507		ko05418	Fluid shear stress and atherosclerosis	Human Diseases	Cardiovascular disease	1	2	3	125	0.48931	0.91208	ENSBGRG00000023889(MMP2)	ENSBGRG00000002112(GSTM3),ENSBGRG00000020093	http://www.kegg.jp/kegg-bin/show_pathway?map=map05418&multi_query=K00799+%23FFFFFF,green%0d%0aK01398+%23FFFFFF,red%0d%0a
BP	GO:0072258	metanephric interstitial fibroblast differentiation	1	0	1	1	ENSBGRG00000021840(OSR1)	-	0.0240705	0.546507		ko04341	Hedgehog signaling pathway - fly	Environmental Information Processing	Signal transduction	0	1	1	32	0.492918	0.91208	-	ENSBGRG00000016563	http://www.kegg.jp/kegg-bin/show_pathway?map=map04341&multi_query=K08957+%23FFFFFF,green%0d%0a
BP	GO:0072259	metanephric interstitial fibroblast development	1	0	1	1	ENSBGRG00000021840(OSR1)	-	0.0240705	0.546507		ko03030	DNA replication	Genetic Information Processing	Replication and repair	1	0	1	32	0.492918	0.91208	ENSBGRG00000018673	-	http://www.kegg.jp/kegg-bin/show_pathway?map=map03030&multi_query=K03505+%23FFFFFF,red%0d%0a
BP	GO:0072721	cellular response to dithiothreitol	1	0	1	1	ENSBGRG00000000977(CERS1)	-	0.0240705	0.546507		ko04140	Autophagy - animal	Cellular Processes	Transport and catabolism	2	1	3	126	0.49463	0.91208	ENSBGRG00000013185(IRS1),ENSBGRG00000000549(ATG101)	ENSBGRG00000005276	http://www.kegg.jp/kegg-bin/show_pathway?map=map04140&multi_query=K16186+%23FFFFFF,green%0d%0aK16172+%23FFFFFF,red%0d%0aK19730+%23FFFFFF,red%0d%0a
BP	GO:0072750	cellular response to leptomycin B	1	0	1	1	ENSBGRG00000004562(ID3)	-	0.0240705	0.546507		ko05210	Colorectal cancer	Human Diseases	Cancer: specific types	0	2	2	79	0.496044	0.91208	-	ENSBGRG00000006944(LEF1),ENSBGRG00000020580(CASP3)	http://www.kegg.jp/kegg-bin/show_pathway?map=map05210&multi_query=K02187+%23FFFFFF,green%0d%0aK04492+%23FFFFFF,green%0d%0a
BP	GO:0090094	metanephric cap mesenchymal cell proliferation involved in metanephros development	1	0	1	1	ENSBGRG00000021840(OSR1)	-	0.0240705	0.546507		ko04080	Neuroactive ligand-receptor interaction	Environmental Information Processing	Signaling molecules and interaction	7	0	7	318	0.50232	0.91208	ENSBGRG00000020868(HTR2A),ENSBGRG00000010476(GRIA3),ENSBGRG00000026296(ADORA1),ENSBGRG00000018072(HTR4),ENSBGRG00000012398(P2RY1),ENSBGRG00000004297(LYNX1),ENSBGRG00000015740	-	http://www.kegg.jp/kegg-bin/show_pathway?map=map04080&multi_query=K04265+%23FFFFFF,red%0d%0aK05228+%23FFFFFF,red%0d%0aK04157+%23FFFFFF,red%0d%0aK04270+%23FFFFFF,red%0d%0aK05199+%23FFFFFF,red%0d%0aK25369+%23FFFFFF,red%0d%0aK04160+%23FFFFFF,red%0d%0a
BP	GO:0090480	purine nucleotide-sugar transmembrane transport	1	0	1	1	ENSBGRG00000009196(SLC35C1)	-	0.0240705	0.546507		ko04512	ECM-receptor interaction	Environmental Information Processing	Signaling molecules and interaction	1	1	2	80	0.502735	0.91208	ENSBGRG00000000863(COL6A2)	ENSBGRG00000000772(COMP)	http://www.kegg.jp/kegg-bin/show_pathway?map=map04512&multi_query=K06238+%23FFFFFF,red%0d%0aK04659+%23FFFFFF,green%0d%0a
BP	GO:0090649	response to oxygen-glucose deprivation	1	0	1	1	ENSBGRG00000001621(AQP3)	-	0.0240705	0.546507		ko00760	Nicotinate and nicotinamide metabolism	Metabolism	Metabolism of cofactors and vitamins	0	1	1	33	0.50359	0.91208	-	ENSBGRG00000021648(ENPP1)	http://www.kegg.jp/kegg-bin/show_pathway?map=map00760&multi_query=K01513+%23FFFFFF,green%0d%0a
BP	GO:0090650	cellular response to oxygen-glucose deprivation	1	0	1	1	ENSBGRG00000001621(AQP3)	-	0.0240705	0.546507		ko05203	Viral carcinogenesis	Human Diseases	Cancer: overview	2	2	4	177	0.511006	0.91208	ENSBGRG00000016458,ENSBGRG00000023703(HDAC7)	ENSBGRG00000019080(TBPL1),ENSBGRG00000020580(CASP3)	http://www.kegg.jp/kegg-bin/show_pathway?map=map05203&multi_query=K11408+%23FFFFFF,red%0d%0aK11252+%23FFFFFF,red%0d%0aK03120+%23FFFFFF,green%0d%0aK02187+%23FFFFFF,green%0d%0a
BP	GO:0099627	neurotransmitter receptor cycle	1	0	1	1	ENSBGRG00000010087(NSG1)	-	0.0240705	0.546507		ko04215	Apoptosis - multiple species	Cellular Processes	Cell growth and death	0	1	1	34	0.514039	0.91208	-	ENSBGRG00000020580(CASP3)	http://www.kegg.jp/kegg-bin/show_pathway?map=map04215&multi_query=K02187+%23FFFFFF,green%0d%0a
BP	GO:0106101	ER-dependent peroxisome localization	1	0	1	1	ENSBGRG00000010057(PEX16)	-	0.0240705	0.546507		ko05310	Asthma	Human Diseases	Immune disease	1	0	1	34	0.514039	0.91208	ENSBGRG00000019125	-	http://www.kegg.jp/kegg-bin/show_pathway?map=map05310&multi_query=K06752+%23FFFFFF,red%0d%0a
BP	GO:0140290	peptidyl-serine ADP-deribosylation	1	0	1	1	ENSBGRG00000009212(ADPRS)	-	0.0240705	0.546507		ko00630	Glyoxylate and dicarboxylate metabolism	Metabolism	Carbohydrate metabolism	1	0	1	34	0.514039	0.91208	ENSBGRG00000020745(PGP)	-	http://www.kegg.jp/kegg-bin/show_pathway?map=map00630&multi_query=K19269+%23FFFFFF,red%0d%0a
BP	GO:1901148	gene expression involved in extracellular matrix organization	1	0	1	1	ENSBGRG00000008978(PBXIP1)	-	0.0240705	0.546507		ko05231	Choline metabolism in cancer	Human Diseases	Cancer: overview	2	0	2	82	0.515945	0.91208	ENSBGRG00000005249(CHKB),ENSBGRG00000018161(PRKCA)	-	http://www.kegg.jp/kegg-bin/show_pathway?map=map05231&multi_query=K14156+%23FFFFFF,red%0d%0aK02677+%23FFFFFF,red%0d%0a
BP	GO:1901329	regulation of odontoblast differentiation	0	1	1	1	-	ENSBGRG00000025440(SERPINE1)	0.0240705	0.546507		ko01522	Endocrine resistance	Human Diseases	Drug resistance: antineoplastic	2	0	2	82	0.515945	0.91208	ENSBGRG00000007727(CDKN2C),ENSBGRG00000023889(MMP2)	-	http://www.kegg.jp/kegg-bin/show_pathway?map=map01522&multi_query=K01398+%23FFFFFF,red%0d%0aK06622+%23FFFFFF,red%0d%0a
BP	GO:1901331	positive regulation of odontoblast differentiation	0	1	1	1	-	ENSBGRG00000025440(SERPINE1)	0.0240705	0.546507		ko03040	Spliceosome	Genetic Information Processing	Transcription	1	2	3	131	0.520815	0.91208	ENSBGRG00000021083	ENSBGRG00000015903,ENSBGRG00000014985	http://www.kegg.jp/kegg-bin/show_pathway?map=map03040&multi_query=K11096+%23FFFFFF,red%0d%0aK12876+%23FFFFFF,green%0d%0aK11092+%23FFFFFF,green%0d%0a
BP	GO:1901344	response to leptomycin B	1	0	1	1	ENSBGRG00000004562(ID3)	-	0.0240705	0.546507		ko05219	Bladder cancer	Human Diseases	Cancer: specific types	1	0	1	35	0.524269	0.91208	ENSBGRG00000023889(MMP2)	-	http://www.kegg.jp/kegg-bin/show_pathway?map=map05219&multi_query=K01398+%23FFFFFF,red%0d%0a
BP	GO:1901346	negative regulation of vasculature development involved in avascular cornea development in camera-type eye	0	1	1	1	-	ENSBGRG00000010987(ANGPTL7)	0.0240705	0.546507		ko04070	Phosphatidylinositol signaling system	Environmental Information Processing	Signal transduction	1	1	2	84	0.528923	0.91208	ENSBGRG00000018161(PRKCA)	ENSBGRG00000023483(IP6K2)	http://www.kegg.jp/kegg-bin/show_pathway?map=map04070&multi_query=K02677+%23FFFFFF,red%0d%0aK07756+%23FFFFFF,green%0d%0a
BP	GO:1902203	negative regulation of hepatocyte growth factor receptor signaling pathway	1	0	1	1	ENSBGRG00000009514(ADAMTS12)	-	0.0240705	0.546507		ko05033	Nicotine addiction	Human Diseases	Substance dependence	1	0	1	36	0.534285	0.91208	ENSBGRG00000010476(GRIA3)	-	http://www.kegg.jp/kegg-bin/show_pathway?map=map05033&multi_query=K05199+%23FFFFFF,red%0d%0a
BP	GO:1904205	negative regulation of skeletal muscle hypertrophy	1	0	1	1	ENSBGRG00000002228(IGFBP5)	-	0.0240705	0.546507		ko05216	Thyroid cancer	Human Diseases	Cancer: specific types	0	1	1	36	0.534285	0.91208	-	ENSBGRG00000006944(LEF1)	http://www.kegg.jp/kegg-bin/show_pathway?map=map05216&multi_query=K04492+%23FFFFFF,green%0d%0a
BP	GO:1904221	negative regulation of serine C-palmitoyltransferase activity	1	0	1	1	ENSBGRG00000021074(ORMDL3)	-	0.0240705	0.546507		ko04218	Cellular senescence	Cellular Processes	Cell growth and death	0	3	3	134	0.536174	0.91208	-	ENSBGRG00000015132(RASSF5),ENSBGRG00000025440(SERPINE1),ENSBGRG00000012579(FOXO1)	http://www.kegg.jp/kegg-bin/show_pathway?map=map04218&multi_query=K07201+%23FFFFFF,green%0d%0aK08015+%23FFFFFF,green%0d%0aK03982+%23FFFFFF,green%0d%0a
BP	GO:1905349	ciliary transition zone assembly	1	0	1	1	ENSBGRG00000002249(DZIP1L)	-	0.0240705	0.546507		ko04972	Pancreatic secretion	Organismal Systems	Digestive system	2	0	2	86	0.541666	0.91208	ENSBGRG00000018161(PRKCA),ENSBGRG00000025371(ATP2B2)	-	http://www.kegg.jp/kegg-bin/show_pathway?map=map04972&multi_query=K02677+%23FFFFFF,red%0d%0aK05850+%23FFFFFF,red%0d%0a
BP	GO:1905395	response to flavonoid	0	1	1	1	-	ENSBGRG00000023483(IP6K2)	0.0240705	0.546507		ko04750	Inflammatory mediator regulation of TRP channels	Organismal Systems	Sensory system	2	0	2	86	0.541666	0.91208	ENSBGRG00000018161(PRKCA),ENSBGRG00000020868(HTR2A)	-	http://www.kegg.jp/kegg-bin/show_pathway?map=map04750&multi_query=K02677+%23FFFFFF,red%0d%0aK04157+%23FFFFFF,red%0d%0a
BP	GO:1905396	cellular response to flavonoid	0	1	1	1	-	ENSBGRG00000023483(IP6K2)	0.0240705	0.546507		ko03022	Basal transcription factors	Genetic Information Processing	Transcription	0	1	1	37	0.544091	0.91208	-	ENSBGRG00000019080(TBPL1)	http://www.kegg.jp/kegg-bin/show_pathway?map=map03022&multi_query=K03120+%23FFFFFF,green%0d%0a
BP	GO:1990519	pyrimidine nucleotide import into mitochondrion	0	1	1	1	-	ENSBGRG00000011115(SLC25A33)	0.0240705	0.546507		ko03420	Nucleotide excision repair	Genetic Information Processing	Replication and repair	1	0	1	37	0.544091	0.91208	ENSBGRG00000018673	-	http://www.kegg.jp/kegg-bin/show_pathway?map=map03420&multi_query=K03505+%23FFFFFF,red%0d%0a
BP	GO:2000857	positive regulation of mineralocorticoid secretion	1	0	1	1	ENSBGRG00000019832(C1QTNF1)	-	0.0240705	0.546507		ko04922	Glucagon signaling pathway	Organismal Systems	Endocrine system	1	1	2	87	0.547948	0.91208	ENSBGRG00000023169(CPT1C)	ENSBGRG00000012579(FOXO1)	http://www.kegg.jp/kegg-bin/show_pathway?map=map04922&multi_query=K07201+%23FFFFFF,green%0d%0aK19524+%23FFFFFF,red%0d%0a
BP	GO:2000860	positive regulation of aldosterone secretion	1	0	1	1	ENSBGRG00000019832(C1QTNF1)	-	0.0240705	0.546507		ko03440	Homologous recombination	Genetic Information Processing	Replication and repair	1	0	1	38	0.553693	0.91208	ENSBGRG00000018673	-	http://www.kegg.jp/kegg-bin/show_pathway?map=map03440&multi_query=K03505+%23FFFFFF,red%0d%0a
BP	GO:2001112	regulation of cellular response to hepatocyte growth factor stimulus	1	0	1	1	ENSBGRG00000009514(ADAMTS12)	-	0.0240705	0.546507		ko05222	Small cell lung cancer	Human Diseases	Cancer: specific types	1	1	2	88	0.55417	0.91208	ENSBGRG00000013000(NOS2)	ENSBGRG00000020580(CASP3)	http://www.kegg.jp/kegg-bin/show_pathway?map=map05222&multi_query=K02187+%23FFFFFF,green%0d%0aK13241+%23FFFFFF,red%0d%0a
BP	GO:2001113	negative regulation of cellular response to hepatocyte growth factor stimulus	1	0	1	1	ENSBGRG00000009514(ADAMTS12)	-	0.0240705	0.546507		ko05215	Prostate cancer	Human Diseases	Cancer: specific types	0	2	2	88	0.55417	0.91208	-	ENSBGRG00000012579(FOXO1),ENSBGRG00000006944(LEF1)	http://www.kegg.jp/kegg-bin/show_pathway?map=map05215&multi_query=K07201+%23FFFFFF,green%0d%0aK04492+%23FFFFFF,green%0d%0a
BP	GO:1901879	regulation of protein depolymerization	3	1	4	47	ENSBGRG00000001095(SH3BP1),ENSBGRG00000007767(NAV3),ENSBGRG00000016460(KATNB1)	ENSBGRG00000017033(HDGFL3)	0.0261064	0.584017		ko05163	Human cytomegalovirus infection	Human Diseases	Infectious disease: viral	1	3	4	189	0.563171	0.91208	ENSBGRG00000018161(PRKCA)	ENSBGRG00000020580(CASP3),ENSBGRG00000001555(GNAI3),ENSBGRG00000021516(GNAO1)	http://www.kegg.jp/kegg-bin/show_pathway?map=map05163&multi_query=K02187+%23FFFFFF,green%0d%0aK02677+%23FFFFFF,red%0d%0aK04534+%23FFFFFF,green%0d%0aK04630+%23FFFFFF,green%0d%0a
BP	GO:0030851	granulocyte differentiation	1	2	3	27	ENSBGRG00000003430(C1QC)	ENSBGRG00000006944(LEF1),ENSBGRG00000015582(EVI2B)	0.0263698	0.584017		ko03015	mRNA surveillance pathway	Genetic Information Processing	Translation	0	2	2	90	0.566433	0.91208	-	ENSBGRG00000014985,ENSBGRG00000022186(NXT2)	http://www.kegg.jp/kegg-bin/show_pathway?map=map03015&multi_query=K14285+%23FFFFFF,green%0d%0aK12876+%23FFFFFF,green%0d%0a
BP	GO:0085029	extracellular matrix assembly	3	0	3	27	ENSBGRG00000010797(FKBP10),ENSBGRG00000012069(EMILIN1),ENSBGRG00000025536(PLOD3)	-	0.0263698	0.584017		ko05415	Diabetic cardiomyopathy	Human Diseases	Cardiovascular disease	4	0	4	191	0.571574	0.91208	ENSBGRG00000013185(IRS1),ENSBGRG00000018161(PRKCA),ENSBGRG00000001042,ENSBGRG00000023889(MMP2)	-	http://www.kegg.jp/kegg-bin/show_pathway?map=map05415&multi_query=K02677+%23FFFFFF,red%0d%0aK01398+%23FFFFFF,red%0d%0aK16172+%23FFFFFF,red%0d%0aK00134+%23FFFFFF,red%0d%0a
BP	GO:1902305	regulation of sodium ion transmembrane transport	3	0	3	27	ENSBGRG00000006075(SNTA1),ENSBGRG00000021840(OSR1),ENSBGRG00000022985(SCN4B)	-	0.0263698	0.584017		ko04514	Cell adhesion molecules	Environmental Information Processing	Signaling molecules and interaction	2	1	3	142	0.575739	0.91208	ENSBGRG00000019125,ENSBGRG00000000800(CLDN1)	ENSBGRG00000000298(CD4)	http://www.kegg.jp/kegg-bin/show_pathway?map=map04514&multi_query=K06752+%23FFFFFF,red%0d%0aK06454+%23FFFFFF,green%0d%0aK06087+%23FFFFFF,red%0d%0a
BP	GO:0001944	vasculature development	13	6	19	488	ENSBGRG00000005255(COL5A1),ENSBGRG00000008928(VEGFC),ENSBGRG00000009361(STAB1),ENSBGRG00000010704(VASH1),ENSBGRG00000010797(FKBP10),ENSBGRG00000012069(EMILIN1),ENSBGRG00000018161(PRKCA),ENSBGRG00000021840(OSR1),ENSBGRG00000023703(HDAC7),ENSBGRG00000023889(MMP2),ENSBGRG00000025096(ANGPTL4),ENSBGRG00000025121(SERPINF1),ENSBGRG00000026704(ARHGEF15)	ENSBGRG00000000772(COMP),ENSBGRG00000006944(LEF1),ENSBGRG00000010987(ANGPTL7),ENSBGRG00000016750(TIPARP),ENSBGRG00000017871(TNMD),ENSBGRG00000025440(SERPINE1)	0.0272023	0.5879		ko05206	MicroRNAs in cancer	Human Diseases	Cancer: overview	2	1	3	142	0.575739	0.91208	ENSBGRG00000013185(IRS1),ENSBGRG00000018161(PRKCA)	ENSBGRG00000020580(CASP3)	http://www.kegg.jp/kegg-bin/show_pathway?map=map05206&multi_query=K02677+%23FFFFFF,red%0d%0aK02187+%23FFFFFF,green%0d%0aK16172+%23FFFFFF,red%0d%0a
BP	GO:0072358	cardiovascular system development	13	6	19	488	ENSBGRG00000005255(COL5A1),ENSBGRG00000008928(VEGFC),ENSBGRG00000009361(STAB1),ENSBGRG00000010704(VASH1),ENSBGRG00000010797(FKBP10),ENSBGRG00000012069(EMILIN1),ENSBGRG00000018161(PRKCA),ENSBGRG00000021840(OSR1),ENSBGRG00000023703(HDAC7),ENSBGRG00000023889(MMP2),ENSBGRG00000025096(ANGPTL4),ENSBGRG00000025121(SERPINF1),ENSBGRG00000026704(ARHGEF15)	ENSBGRG00000000772(COMP),ENSBGRG00000006944(LEF1),ENSBGRG00000010987(ANGPTL7),ENSBGRG00000016750(TIPARP),ENSBGRG00000017871(TNMD),ENSBGRG00000025440(SERPINE1)	0.0272023	0.5879		ko05165	Human papillomavirus infection	Human Diseases	Infectious disease: viral	1	5	6	292	0.578568	0.91208	ENSBGRG00000000863(COL6A2)	ENSBGRG00000012579(FOXO1),ENSBGRG00000019080(TBPL1),ENSBGRG00000020580(CASP3),ENSBGRG00000000772(COMP),ENSBGRG00000016563	http://www.kegg.jp/kegg-bin/show_pathway?map=map05165&multi_query=K04659+%23FFFFFF,green%0d%0aK07201+%23FFFFFF,green%0d%0aK06238+%23FFFFFF,red%0d%0aK08957+%23FFFFFF,green%0d%0aK03120+%23FFFFFF,green%0d%0aK02187+%23FFFFFF,green%0d%0a
BP	GO:0030202	heparin metabolic process	1	1	2	11	ENSBGRG00000006039(XYLT2)	ENSBGRG00000020997(GLCE)	0.0275222	0.5879		ko04150	mTOR signaling pathway	Environmental Information Processing	Signal transduction	2	1	3	143	0.580537	0.91208	ENSBGRG00000018161(PRKCA),ENSBGRG00000013185(IRS1)	ENSBGRG00000005276	http://www.kegg.jp/kegg-bin/show_pathway?map=map04150&multi_query=K16186+%23FFFFFF,green%0d%0aK16172+%23FFFFFF,red%0d%0aK02677+%23FFFFFF,red%0d%0a
BP	GO:0034349	glial cell apoptotic process	1	1	2	11	ENSBGRG00000018161(PRKCA)	ENSBGRG00000020580(CASP3)	0.0275222	0.5879		ko00071	Fatty acid degradation	Metabolism	Lipid metabolism	1	0	1	41	0.581308	0.91208	ENSBGRG00000023169(CPT1C)	-	http://www.kegg.jp/kegg-bin/show_pathway?map=map00071&multi_query=K19524+%23FFFFFF,red%0d%0a
BP	GO:0070141	response to UV-A	2	0	2	11	ENSBGRG00000000977(CERS1),ENSBGRG00000023889(MMP2)	-	0.0275222	0.5879		ko05161	Hepatitis B	Human Diseases	Infectious disease: viral	1	2	3	145	0.59003	0.91208	ENSBGRG00000018161(PRKCA)	ENSBGRG00000020580(CASP3),ENSBGRG00000001762(STAT4)	http://www.kegg.jp/kegg-bin/show_pathway?map=map05161&multi_query=K11222+%23FFFFFF,green%0d%0aK02677+%23FFFFFF,red%0d%0aK02187+%23FFFFFF,green%0d%0a
BP	GO:0150146	cell junction disassembly	2	0	2	11	ENSBGRG00000003422(C1QA),ENSBGRG00000003430(C1QC)	-	0.0275222	0.5879		ko04975	Fat digestion and absorption	Organismal Systems	Digestive system	0	1	1	42	0.590131	0.91208	-	ENSBGRG00000002196(MTTP)	http://www.kegg.jp/kegg-bin/show_pathway?map=map04975&multi_query=K14463+%23FFFFFF,green%0d%0a
BP	GO:0051093	negative regulation of developmental process	18	6	24	659	ENSBGRG00000002228(IGFBP5),ENSBGRG00000002743(RARG),ENSBGRG00000003430(C1QC),ENSBGRG00000004562(ID3),ENSBGRG00000005255(COL5A1),ENSBGRG00000006516(SIX2),ENSBGRG00000007158(SOX8),ENSBGRG00000008928(VEGFC),ENSBGRG00000009361(STAB1),ENSBGRG00000009514(ADAMTS12),ENSBGRG00000010067(GDF11),ENSBGRG00000010704(VASH1),ENSBGRG00000010882(SPRY4),ENSBGRG00000012069(EMILIN1),ENSBGRG00000021840(OSR1),ENSBGRG00…	ENSBGRG00000006944(LEF1),ENSBGRG00000010987(ANGPTL7),ENSBGRG00000017871(TNMD),ENSBGRG00000021648(ENPP1),ENSBGRG00000022242(SEMA3A),ENSBGRG00000025440(SERPINE1)	0.0286429	0.608241		ko04962	Vasopressin-regulated water reabsorption	Organismal Systems	Excretory system	1	0	1	42	0.590131	0.91208	ENSBGRG00000001621(AQP3)	-	http://www.kegg.jp/kegg-bin/show_pathway?map=map04962&multi_query=K09876+%23FFFFFF,red%0d%0a
BP	GO:0044281	small molecule metabolic process	28	10	38	1153	ENSBGRG00000001042,ENSBGRG00000003997(PEDS1),ENSBGRG00000006039(XYLT2),ENSBGRG00000007466(DHRS3),ENSBGRG00000008221(MAN2A2),ENSBGRG00000009694(KCNJ11),ENSBGRG00000009880(MACROD1),ENSBGRG00000010063(C1QTNF3),ENSBGRG00000012759(MGAT1),ENSBGRG00000012998(ABCC10),ENSBGRG00000013000(NOS2),ENSBGRG00000013185(IRS1),ENSBGRG00000013438(CNP),ENSBGRG00000013821(PTGS1),ENSBGRG00000014312(MCAT),ENSBGRG0000001…	ENSBGRG00000001555(GNAI3),ENSBGRG00000004396(LACC1),ENSBGRG00000007032(IYD),ENSBGRG00000012579(FOXO1),ENSBGRG00000019917(VNN2),ENSBGRG00000020997(GLCE),ENSBGRG00000021447(ERFE),ENSBGRG00000021648(ENPP1),ENSBGRG00000023483(IP6K2),ENSBGRG00000024244	0.0290708	0.613199		ko00620	Pyruvate metabolism	Metabolism	Carbohydrate metabolism	1	0	1	44	0.607225	0.91208	ENSBGRG00000026102(HAGH)	-	http://www.kegg.jp/kegg-bin/show_pathway?map=map00620&multi_query=K01069+%23FFFFFF,red%0d%0a
BP	GO:0033365	protein localization to organelle	15	6	21	561	ENSBGRG00000001780(MCRS1),ENSBGRG00000002249(DZIP1L),ENSBGRG00000006287(TESK1),ENSBGRG00000006516(SIX2),ENSBGRG00000007003(LRWD1),ENSBGRG00000007476(TRIM8),ENSBGRG00000010057(PEX16),ENSBGRG00000013980(NUDCD3),ENSBGRG00000015628(EMC9),ENSBGRG00000015957(GLIS2),ENSBGRG00000018601(OBSL1),ENSBGRG00000020868(HTR2A),ENSBGRG00000021074(ORMDL3),ENSBGRG00000025223(NOP53),ENSBGRG00000025467(KPTN)	ENSBGRG00000001644(SNX10),ENSBGRG00000001715(CAMLG),ENSBGRG00000003715(RAB8B),ENSBGRG00000007330(PARP9),ENSBGRG00000015132(RASSF5),ENSBGRG00000017005(MTBP)	0.0303932	0.613199		ko00514	Other types of O-glycan biosynthesis	Metabolism	Glycan biosynthesis and metabolism	1	0	1	44	0.607225	0.91208	ENSBGRG00000025536(PLOD3)	-	http://www.kegg.jp/kegg-bin/show_pathway?map=map00514&multi_query=K13646+%23FFFFFF,red%0d%0a
BP	GO:0030278	regulation of ossification	7	1	8	152	ENSBGRG00000002228(IGFBP5),ENSBGRG00000004562(ID3),ENSBGRG00000006516(SIX2),ENSBGRG00000008928(VEGFC),ENSBGRG00000009028(ZHX3),ENSBGRG00000021840(OSR1),ENSBGRG00000023703(HDAC7)	ENSBGRG00000000772(COMP)	0.0307228	0.613199		ko04370	VEGF signaling pathway	Environmental Information Processing	Signal transduction	1	0	1	44	0.607225	0.91208	ENSBGRG00000018161(PRKCA)	-	http://www.kegg.jp/kegg-bin/show_pathway?map=map04370&multi_query=K02677+%23FFFFFF,red%0d%0a
BP	GO:0010677	negative regulation of cellular carbohydrate metabolic process	2	1	3	29	ENSBGRG00000010063(C1QTNF3),ENSBGRG00000020745(PGP)	ENSBGRG00000021648(ENPP1)	0.0318083	0.613199		ko05168	Herpes simplex virus 1 infection	Human Diseases	Infectious disease: viral	1	5	6	301	0.608534	0.91208	ENSBGRG00000019125	ENSBGRG00000014757(ZFP90),ENSBGRG00000012197(ZNF484),ENSBGRG00000019082(ZNF599),ENSBGRG00000015921,ENSBGRG00000020580(CASP3)	http://www.kegg.jp/kegg-bin/show_pathway?map=map05168&multi_query=K06752+%23FFFFFF,red%0d%0aK09228+%23FFFFFF,green%0d%0aK02187+%23FFFFFF,green%0d%0a
BP	GO:0046888	negative regulation of hormone secretion	3	0	3	29	ENSBGRG00000009694(KCNJ11),ENSBGRG00000013185(IRS1),ENSBGRG00000025509(KCNB1)	-	0.0318083	0.613199		ko05330	Allograft rejection	Human Diseases	Immune disease	1	0	1	45	0.615505	0.91208	ENSBGRG00000019125	-	http://www.kegg.jp/kegg-bin/show_pathway?map=map05330&multi_query=K06752+%23FFFFFF,red%0d%0a
BP	GO:0072210	metanephric nephron development	3	0	3	29	ENSBGRG00000006516(SIX2),ENSBGRG00000007158(SOX8),ENSBGRG00000021840(OSR1)	-	0.0318083	0.613199		ko00565	Ether lipid metabolism	Metabolism	Lipid metabolism	1	0	1	45	0.615505	0.91208	ENSBGRG00000003997(PEDS1)	-	http://www.kegg.jp/kegg-bin/show_pathway?map=map00565&multi_query=K20656+%23FFFFFF,red%0d%0a
BP	GO:0045721	negative regulation of gluconeogenesis	2	0	2	12	ENSBGRG00000010063(C1QTNF3),ENSBGRG00000020745(PGP)	-	0.0325093	0.613199		ko05030	Cocaine addiction	Human Diseases	Substance dependence	0	1	1	45	0.615505	0.91208	-	ENSBGRG00000001555(GNAI3)	http://www.kegg.jp/kegg-bin/show_pathway?map=map05030&multi_query=K04630+%23FFFFFF,green%0d%0a
BP	GO:0050650	chondroitin sulfate proteoglycan biosynthetic process	2	0	2	12	ENSBGRG00000006039(XYLT2),ENSBGRG00000019378(CHPF)	-	0.0325093	0.613199		ko00520	Amino sugar and nucleotide sugar metabolism	Metabolism	Carbohydrate metabolism	1	0	1	47	0.631548	0.91208	ENSBGRG00000025209(MPI)	-	http://www.kegg.jp/kegg-bin/show_pathway?map=map00520&multi_query=K01809+%23FFFFFF,red%0d%0a
BP	GO:0071816	tail-anchored membrane protein insertion into ER membrane	1	1	2	12	ENSBGRG00000015628(EMC9)	ENSBGRG00000001715(CAMLG)	0.0325093	0.613199		ko00600	Sphingolipid metabolism	Metabolism	Lipid metabolism	1	0	1	48	0.639318	0.91208	ENSBGRG00000000977(CERS1)	-	http://www.kegg.jp/kegg-bin/show_pathway?map=map00600&multi_query=K04710+%23FFFFFF,red%0d%0a
BP	GO:1902570	protein localization to nucleolus	2	0	2	12	ENSBGRG00000001780(MCRS1),ENSBGRG00000025223(NOP53)	-	0.0325093	0.613199		ko05110	Vibrio cholerae infection	Human Diseases	Infectious disease: bacterial	1	0	1	48	0.639318	0.91208	ENSBGRG00000018161(PRKCA)	-	http://www.kegg.jp/kegg-bin/show_pathway?map=map05110&multi_query=K02677+%23FFFFFF,red%0d%0a
BP	GO:0060323	head morphogenesis	1	2	3	30	ENSBGRG00000023889(MMP2)	ENSBGRG00000006944(LEF1),ENSBGRG00000016750(TIPARP)	0.0347304	0.613199		ko03460	Fanconi anemia pathway	Genetic Information Processing	Replication and repair	1	0	1	48	0.639318	0.91208	ENSBGRG00000016287(FANCE)	-	http://www.kegg.jp/kegg-bin/show_pathway?map=map03460&multi_query=K10892+%23FFFFFF,red%0d%0a
BP	GO:0022603	regulation of anatomical structure morphogenesis	19	4	23	640	ENSBGRG00000005255(COL5A1),ENSBGRG00000006287(TESK1),ENSBGRG00000006516(SIX2),ENSBGRG00000007158(SOX8),ENSBGRG00000008928(VEGFC),ENSBGRG00000009361(STAB1),ENSBGRG00000009514(ADAMTS12),ENSBGRG00000010704(VASH1),ENSBGRG00000010882(SPRY4),ENSBGRG00000012069(EMILIN1),ENSBGRG00000012398(P2RY1),ENSBGRG00000018161(PRKCA),ENSBGRG00000018601(OBSL1),ENSBGRG00000021566(PKHD1),ENSBGRG00000021840(OSR1),ENSBGR…	ENSBGRG00000007052(NTN4),ENSBGRG00000017871(TNMD),ENSBGRG00000022242(SEMA3A),ENSBGRG00000025440(SERPINE1)	0.0361213	0.613199		ko00270	Cysteine and methionine metabolism	Metabolism	Amino acid metabolism	1	0	1	48	0.639318	0.91208	ENSBGRG00000021573(MRI1)	-	http://www.kegg.jp/kegg-bin/show_pathway?map=map00270&multi_query=K08963+%23FFFFFF,red%0d%0a
BP	GO:0006029	proteoglycan metabolic process	3	1	4	52	ENSBGRG00000006039(XYLT2),ENSBGRG00000009514(ADAMTS12),ENSBGRG00000019378(CHPF)	ENSBGRG00000020997(GLCE)	0.0361264	0.613199		ko05152	Tuberculosis	Human Diseases	Infectious disease: bacterial	2	1	3	156	0.639745	0.91208	ENSBGRG00000019125,ENSBGRG00000013000(NOS2)	ENSBGRG00000020580(CASP3)	http://www.kegg.jp/kegg-bin/show_pathway?map=map05152&multi_query=K02187+%23FFFFFF,green%0d%0aK13241+%23FFFFFF,red%0d%0aK06752+%23FFFFFF,red%0d%0a
BP	GO:0061035	regulation of cartilage development	4	0	4	52	ENSBGRG00000002743(RARG),ENSBGRG00000006516(SIX2),ENSBGRG00000009514(ADAMTS12),ENSBGRG00000009629(BMP1)	-	0.0361264	0.613199		ko00280	Valine, leucine and isoleucine degradation	Metabolism	Amino acid metabolism	1	0	1	49	0.646926	0.91208	ENSBGRG00000014917(ACAD8)	-	http://www.kegg.jp/kegg-bin/show_pathway?map=map00280&multi_query=K11538+%23FFFFFF,red%0d%0a
BP	GO:1903829	positive regulation of cellular protein localization	9	1	10	216	ENSBGRG00000001780(MCRS1),ENSBGRG00000006287(TESK1),ENSBGRG00000007476(TRIM8),ENSBGRG00000012924(STX3),ENSBGRG00000012958(STAC2),ENSBGRG00000015957(GLIS2),ENSBGRG00000018717(CNPY4),ENSBGRG00000021074(ORMDL3),ENSBGRG00000025509(KCNB1)	ENSBGRG00000007330(PARP9)	0.0364458	0.613199		ko04940	Type I diabetes mellitus	Human Diseases	Endocrine and metabolic disease	1	0	1	49	0.646926	0.91208	ENSBGRG00000019125	-	http://www.kegg.jp/kegg-bin/show_pathway?map=map04940&multi_query=K06752+%23FFFFFF,red%0d%0a
BP	GO:1903350	response to dopamine	2	1	3	31	ENSBGRG00000010087(NSG1),ENSBGRG00000020868(HTR2A)	ENSBGRG00000001555(GNAI3)	0.0377863	0.613199		ko05332	Graft-versus-host disease	Human Diseases	Immune disease	1	0	1	49	0.646926	0.91208	ENSBGRG00000019125	-	http://www.kegg.jp/kegg-bin/show_pathway?map=map05332&multi_query=K06752+%23FFFFFF,red%0d%0a
BP	GO:1903351	cellular response to dopamine	2	1	3	31	ENSBGRG00000010087(NSG1),ENSBGRG00000020868(HTR2A)	ENSBGRG00000001555(GNAI3)	0.0377863	0.613199		ko04623	Cytosolic DNA-sensing pathway	Organismal Systems	Immune system	1	0	1	50	0.654374	0.91208	ENSBGRG00000013230(POLR2E)	-	http://www.kegg.jp/kegg-bin/show_pathway?map=map04623&multi_query=K03013+%23FFFFFF,red%0d%0a
BP	GO:0006625	protein targeting to peroxisome	1	1	2	13	ENSBGRG00000010057(PEX16)	ENSBGRG00000003715(RAB8B)	0.0378195	0.613199		ko05134	Legionellosis	Human Diseases	Infectious disease: bacterial	0	1	1	50	0.654374	0.91208	-	ENSBGRG00000020580(CASP3)	http://www.kegg.jp/kegg-bin/show_pathway?map=map05134&multi_query=K02187+%23FFFFFF,green%0d%0a
BP	GO:0015919	peroxisomal membrane transport	1	1	2	13	ENSBGRG00000010057(PEX16)	ENSBGRG00000003715(RAB8B)	0.0378195	0.613199		ko03013	Nucleocytoplasmic transport	Genetic Information Processing	Translation	0	2	2	107	0.660845	0.91208	-	ENSBGRG00000014985,ENSBGRG00000022186(NXT2)	http://www.kegg.jp/kegg-bin/show_pathway?map=map03013&multi_query=K12876+%23FFFFFF,green%0d%0aK14285+%23FFFFFF,green%0d%0a
BP	GO:0072662	protein localization to peroxisome	1	1	2	13	ENSBGRG00000010057(PEX16)	ENSBGRG00000003715(RAB8B)	0.0378195	0.613199		ko05166	Human T-cell leukemia virus 1 infection	Human Diseases	Infectious disease: viral	2	2	4	214	0.661386	0.91208	ENSBGRG00000019125,ENSBGRG00000007727(CDKN2C)	ENSBGRG00000019080(TBPL1),ENSBGRG00000000298(CD4)	http://www.kegg.jp/kegg-bin/show_pathway?map=map05166&multi_query=K06454+%23FFFFFF,green%0d%0aK06752+%23FFFFFF,red%0d%0aK06622+%23FFFFFF,red%0d%0aK03120+%23FFFFFF,green%0d%0a
BP	GO:0072663	establishment of protein localization to peroxisome	1	1	2	13	ENSBGRG00000010057(PEX16)	ENSBGRG00000003715(RAB8B)	0.0378195	0.613199		ko05144	Malaria	Human Diseases	Infectious disease: parasitic	0	1	1	51	0.661665	0.91208	-	ENSBGRG00000000772(COMP)	http://www.kegg.jp/kegg-bin/show_pathway?map=map05144&multi_query=K04659+%23FFFFFF,green%0d%0a
BP	GO:0032501	multicellular organismal process	92	28	120	4350	ENSBGRG00000000399(CRLF1),ENSBGRG00000001095(SH3BP1),ENSBGRG00000001621(AQP3),ENSBGRG00000001780(MCRS1),ENSBGRG00000002228(IGFBP5),ENSBGRG00000002249(DZIP1L),ENSBGRG00000002480(SOX7),ENSBGRG00000002743(RARG),ENSBGRG00000002816(SLC6A17),ENSBGRG00000002838(SUN2),ENSBGRG00000003422(C1QA),ENSBGRG00000003430(C1QC),ENSBGRG00000004562(ID3),ENSBGRG00000005249(CHKB),ENSBGRG00000005255(COL5A1),ENSBGRG00000…	ENSBGRG00000000298(CD4),ENSBGRG00000000772(COMP),ENSBGRG00000001644(SNX10),ENSBGRG00000002196(MTTP),ENSBGRG00000004396(LACC1),ENSBGRG00000004809(PKHD1L1),ENSBGRG00000006944(LEF1),ENSBGRG00000007052(NTN4),ENSBGRG00000008883(CLEC4D),ENSBGRG00000009248(IL12RB2),ENSBGRG00000009561(COL11A1),ENSBGRG00000010677(VIT),ENSBGRG00000010987(ANGPTL7),ENSBGRG00000013873(COL13A1),ENSBGRG00000015582(EVI2B),ENSBGR…	0.0388425	0.613199		ko05213	Endometrial cancer	Human Diseases	Cancer: specific types	0	1	1	51	0.661665	0.91208	-	ENSBGRG00000006944(LEF1)	http://www.kegg.jp/kegg-bin/show_pathway?map=map05213&multi_query=K04492+%23FFFFFF,green%0d%0a
BP	GO:1905330	regulation of morphogenesis of an epithelium	4	1	5	78	ENSBGRG00000006516(SIX2),ENSBGRG00000007158(SOX8),ENSBGRG00000009514(ADAMTS12),ENSBGRG00000021566(PKHD1)	ENSBGRG00000007052(NTN4)	0.039757	0.613199		ko04720	Long-term potentiation	Organismal Systems	Nervous system	1	0	1	52	0.668804	0.91208	ENSBGRG00000018161(PRKCA)	-	http://www.kegg.jp/kegg-bin/show_pathway?map=map04720&multi_query=K02677+%23FFFFFF,red%0d%0a
BP	GO:1900047	negative regulation of hemostasis	1	2	3	32	ENSBGRG00000019832(C1QTNF1)	ENSBGRG00000000772(COMP),ENSBGRG00000025440(SERPINE1)	0.0409749	0.613199		ko04659	Th17 cell differentiation	Organismal Systems	Immune system	1	1	2	110	0.675696	0.91208	ENSBGRG00000019125	ENSBGRG00000000298(CD4)	http://www.kegg.jp/kegg-bin/show_pathway?map=map04659&multi_query=K06752+%23FFFFFF,red%0d%0aK06454+%23FFFFFF,green%0d%0a
BP	GO:0001657	ureteric bud development	5	0	5	79	ENSBGRG00000000399(CRLF1),ENSBGRG00000006516(SIX2),ENSBGRG00000007158(SOX8),ENSBGRG00000010067(GDF11),ENSBGRG00000021840(OSR1)	-	0.041642	0.613199		ko00830	Retinol metabolism	Metabolism	Metabolism of cofactors and vitamins	1	0	1	53	0.675794	0.91208	ENSBGRG00000007466(DHRS3)	-	http://www.kegg.jp/kegg-bin/show_pathway?map=map00830&multi_query=K11146+%23FFFFFF,red%0d%0a
BP	GO:0072163	mesonephric epithelium development	5	0	5	79	ENSBGRG00000000399(CRLF1),ENSBGRG00000006516(SIX2),ENSBGRG00000007158(SOX8),ENSBGRG00000010067(GDF11),ENSBGRG00000021840(OSR1)	-	0.041642	0.613199		ko00240	Pyrimidine metabolism	Metabolism	Nucleotide metabolism	0	1	1	53	0.675794	0.91208	-	ENSBGRG00000021648(ENPP1)	http://www.kegg.jp/kegg-bin/show_pathway?map=map00240&multi_query=K01513+%23FFFFFF,green%0d%0a
BP	GO:0072164	mesonephric tubule development	5	0	5	79	ENSBGRG00000000399(CRLF1),ENSBGRG00000006516(SIX2),ENSBGRG00000007158(SOX8),ENSBGRG00000010067(GDF11),ENSBGRG00000021840(OSR1)	-	0.041642	0.613199		ko05320	Autoimmune thyroid disease	Human Diseases	Immune disease	1	0	1	53	0.675794	0.91208	ENSBGRG00000019125	-	http://www.kegg.jp/kegg-bin/show_pathway?map=map05320&multi_query=K06752+%23FFFFFF,red%0d%0a
BP	GO:0030279	negative regulation of ossification	4	0	4	55	ENSBGRG00000002228(IGFBP5),ENSBGRG00000004562(ID3),ENSBGRG00000008928(VEGFC),ENSBGRG00000023703(HDAC7)	-	0.0430655	0.613199		ko04664	Fc epsilon RI signaling pathway	Organismal Systems	Immune system	1	0	1	54	0.682637	0.91208	ENSBGRG00000018161(PRKCA)	-	http://www.kegg.jp/kegg-bin/show_pathway?map=map04664&multi_query=K02677+%23FFFFFF,red%0d%0a
BP	GO:0003417	growth plate cartilage development	1	1	2	14	ENSBGRG00000002743(RARG)	ENSBGRG00000000772(COMP)	0.0434345	0.613199		ko05132	Salmonella infection	Human Diseases	Infectious disease: bacterial	2	2	4	221	0.686076	0.91208	ENSBGRG00000001042,ENSBGRG00000021046(SNX18)	ENSBGRG00000006944(LEF1),ENSBGRG00000020580(CASP3)	http://www.kegg.jp/kegg-bin/show_pathway?map=map05132&multi_query=K00134+%23FFFFFF,red%0d%0aK17923+%23FFFFFF,red%0d%0aK02187+%23FFFFFF,green%0d%0aK04492+%23FFFFFF,green%0d%0a
BP	GO:0044789	modulation by host of viral release from host cell	2	0	2	14	ENSBGRG00000007476(TRIM8),ENSBGRG00000025151(MARCHF2)	-	0.0434345	0.613199		ko04672	Intestinal immune network for IgA production	Organismal Systems	Immune system	1	0	1	55	0.689336	0.91208	ENSBGRG00000019125	-	http://www.kegg.jp/kegg-bin/show_pathway?map=map04672&multi_query=K06752+%23FFFFFF,red%0d%0a
BP	GO:0044790	negative regulation by host of viral release from host cell	2	0	2	14	ENSBGRG00000007476(TRIM8),ENSBGRG00000025151(MARCHF2)	-	0.0434345	0.613199		ko04978	Mineral absorption	Organismal Systems	Digestive system	1	0	1	56	0.695895	0.91208	ENSBGRG00000025371(ATP2B2)	-	http://www.kegg.jp/kegg-bin/show_pathway?map=map04978&multi_query=K05850+%23FFFFFF,red%0d%0a
BP	GO:0060292	long-term synaptic depression	2	0	2	14	ENSBGRG00000025509(KCNB1),ENSBGRG00000026296(ADORA1)	-	0.0434345	0.613199		ko00230	Purine metabolism	Metabolism	Nucleotide metabolism	1	1	2	116	0.703821	0.91208	ENSBGRG00000019109(PDE9A)	ENSBGRG00000021648(ENPP1)	http://www.kegg.jp/kegg-bin/show_pathway?map=map00230&multi_query=K13761+%23FFFFFF,red%0d%0aK01513+%23FFFFFF,green%0d%0a
BP	GO:0072077	renal vesicle morphogenesis	2	0	2	14	ENSBGRG00000006516(SIX2),ENSBGRG00000007158(SOX8)	-	0.0434345	0.613199		ko05130	Pathogenic Escherichia coli infection	Human Diseases	Infectious disease: bacterial	2	1	3	173	0.708038	0.91208	ENSBGRG00000001042,ENSBGRG00000000800(CLDN1)	ENSBGRG00000020580(CASP3)	http://www.kegg.jp/kegg-bin/show_pathway?map=map05130&multi_query=K02187+%23FFFFFF,green%0d%0aK06087+%23FFFFFF,red%0d%0aK00134+%23FFFFFF,red%0d%0a
BP	GO:0072234	metanephric nephron tubule development	2	0	2	14	ENSBGRG00000007158(SOX8),ENSBGRG00000021840(OSR1)	-	0.0434345	0.613199		ko05217	Basal cell carcinoma	Human Diseases	Cancer: specific types	0	1	1	58	0.708602	0.91208	-	ENSBGRG00000006944(LEF1)	http://www.kegg.jp/kegg-bin/show_pathway?map=map05217&multi_query=K04492+%23FFFFFF,green%0d%0a
BP	GO:0090189	regulation of branching involved in ureteric bud morphogenesis	2	0	2	14	ENSBGRG00000006516(SIX2),ENSBGRG00000007158(SOX8)	-	0.0434345	0.613199		ko00310	Lysine degradation	Metabolism	Amino acid metabolism	1	0	1	58	0.708602	0.91208	ENSBGRG00000025536(PLOD3)	-	http://www.kegg.jp/kegg-bin/show_pathway?map=map00310&multi_query=K13646+%23FFFFFF,red%0d%0a
BP	GO:1902186	regulation of viral release from host cell	2	0	2	14	ENSBGRG00000007476(TRIM8),ENSBGRG00000025151(MARCHF2)	-	0.0434345	0.613199		ko05131	Shigellosis	Human Diseases	Infectious disease: bacterial	2	2	4	228	0.709487	0.91208	ENSBGRG00000015411,ENSBGRG00000016242	ENSBGRG00000012579(FOXO1),ENSBGRG00000005276	http://www.kegg.jp/kegg-bin/show_pathway?map=map05131&multi_query=K11253+%23FFFFFF,red%0d%0aK07201+%23FFFFFF,green%0d%0aK16186+%23FFFFFF,green%0d%0a
BP	GO:1902187	negative regulation of viral release from host cell	2	0	2	14	ENSBGRG00000007476(TRIM8),ENSBGRG00000025151(MARCHF2)	-	0.0434345	0.613199		ko04270	Vascular smooth muscle contraction	Organismal Systems	Circulatory system	2	0	2	118	0.712738	0.91208	ENSBGRG00000018161(PRKCA),ENSBGRG00000010518(MYLK4)	-	http://www.kegg.jp/kegg-bin/show_pathway?map=map04270&multi_query=K00907+%23FFFFFF,red%0d%0aK02677+%23FFFFFF,red%0d%0a
BP	GO:0034504	protein localization to nucleus	7	2	9	193	ENSBGRG00000001780(MCRS1),ENSBGRG00000006287(TESK1),ENSBGRG00000006516(SIX2),ENSBGRG00000007476(TRIM8),ENSBGRG00000015957(GLIS2),ENSBGRG00000021074(ORMDL3),ENSBGRG00000025223(NOP53)	ENSBGRG00000007330(PARP9),ENSBGRG00000015132(RASSF5)	0.0440704	0.613199		ko00561	Glycerolipid metabolism	Metabolism	Lipid metabolism	1	0	1	59	0.714757	0.91208	ENSBGRG00000016878(MOGAT1)	-	http://www.kegg.jp/kegg-bin/show_pathway?map=map00561&multi_query=K14458+%23FFFFFF,red%0d%0a
BP	GO:0045912	negative regulation of carbohydrate metabolic process	2	1	3	33	ENSBGRG00000010063(C1QTNF3),ENSBGRG00000020745(PGP)	ENSBGRG00000021648(ENPP1)	0.0442947	0.613199		ko05010	Alzheimer disease	Human Diseases	Neurodegenerative disease	4	2	6	337	0.715879	0.91208	ENSBGRG00000000549(ATG101),ENSBGRG00000013000(NOS2),ENSBGRG00000001042,ENSBGRG00000013185(IRS1)	ENSBGRG00000020580(CASP3),ENSBGRG00000016563	http://www.kegg.jp/kegg-bin/show_pathway?map=map05010&multi_query=K13241+%23FFFFFF,red%0d%0aK00134+%23FFFFFF,red%0d%0aK19730+%23FFFFFF,red%0d%0aK16172+%23FFFFFF,red%0d%0aK02187+%23FFFFFF,green%0d%0aK08957+%23FFFFFF,green%0d%0a
BP	GO:0060612	adipose tissue development	3	0	3	33	ENSBGRG00000007158(SOX8),ENSBGRG00000008276(SLC25A25),ENSBGRG00000009986(AMER1)	-	0.0442947	0.613199		ko05221	Acute myeloid leukemia	Human Diseases	Cancer: specific types	0	1	1	60	0.720782	0.91208	-	ENSBGRG00000006944(LEF1)	http://www.kegg.jp/kegg-bin/show_pathway?map=map05221&multi_query=K04492+%23FFFFFF,green%0d%0a
BP	GO:1901342	regulation of vasculature development	7	3	10	224	ENSBGRG00000008928(VEGFC),ENSBGRG00000009361(STAB1),ENSBGRG00000010704(VASH1),ENSBGRG00000012069(EMILIN1),ENSBGRG00000018161(PRKCA),ENSBGRG00000023703(HDAC7),ENSBGRG00000025121(SERPINF1)	ENSBGRG00000010987(ANGPTL7),ENSBGRG00000017871(TNMD),ENSBGRG00000025440(SERPINE1)	0.0448201	0.613199		ko04391	Hippo signaling pathway - fly	Environmental Information Processing	Signal transduction	1	0	1	60	0.720782	0.91208	ENSBGRG00000022648(TSHZ1)	-	http://www.kegg.jp/kegg-bin/show_pathway?map=map04391&multi_query=K09236+%23FFFFFF,red%0d%0a
BP	GO:0006864	pyrimidine nucleotide transport	0	1	1	2	-	ENSBGRG00000011115(SLC25A33)	0.0475634	0.613199		ko05205	Proteoglycans in cancer	Human Diseases	Cancer: overview	2	1	3	179	0.729663	0.915313	ENSBGRG00000023889(MMP2),ENSBGRG00000018161(PRKCA)	ENSBGRG00000020580(CASP3)	http://www.kegg.jp/kegg-bin/show_pathway?map=map05205&multi_query=K02677+%23FFFFFF,red%0d%0aK01398+%23FFFFFF,red%0d%0aK02187+%23FFFFFF,green%0d%0a
BP	GO:0007089	traversing start control point of mitotic cell cycle	0	1	1	2	-	ENSBGRG00000017005(MTBP)	0.0475634	0.613199		ko05120	Epithelial cell signaling in Helicobacter pylori infection	Human Diseases	Infectious disease: bacterial	0	1	1	62	0.732457	0.915313	-	ENSBGRG00000020580(CASP3)	http://www.kegg.jp/kegg-bin/show_pathway?map=map05120&multi_query=K02187+%23FFFFFF,green%0d%0a
BP	GO:0015939	pantothenate metabolic process	0	1	1	2	-	ENSBGRG00000019917(VNN2)	0.0475634	0.613199		ko04520	Adherens junction	Cellular Processes	Cellular community - eukaryotes	0	1	1	64	0.743646	0.915313	-	ENSBGRG00000006944(LEF1)	http://www.kegg.jp/kegg-bin/show_pathway?map=map04520&multi_query=K04492+%23FFFFFF,green%0d%0a
BP	GO:0019371	cyclooxygenase pathway	1	0	1	2	ENSBGRG00000013821(PTGS1)	-	0.0475634	0.613199		ko05214	Glioma	Human Diseases	Cancer: specific types	1	0	1	64	0.743646	0.915313	ENSBGRG00000018161(PRKCA)	-	http://www.kegg.jp/kegg-bin/show_pathway?map=map05214&multi_query=K02677+%23FFFFFF,red%0d%0a
BP	GO:0021873	forebrain neuroblast division	0	1	1	2	-	ENSBGRG00000006944(LEF1)	0.0475634	0.613199		ko04742	Taste transduction	Organismal Systems	Sensory system	1	0	1	65	0.749065	0.915313	ENSBGRG00000012398(P2RY1)	-	http://www.kegg.jp/kegg-bin/show_pathway?map=map04742&multi_query=K04270+%23FFFFFF,red%0d%0a
BP	GO:0021943	formation of radial glial scaffolds	0	1	1	2	-	ENSBGRG00000006944(LEF1)	0.0475634	0.613199		ko05417	Lipid and atherosclerosis	Human Diseases	Cardiovascular disease	2	1	3	185	0.750024	0.915313	ENSBGRG00000026571,ENSBGRG00000018161(PRKCA)	ENSBGRG00000020580(CASP3)	http://www.kegg.jp/kegg-bin/show_pathway?map=map05417&multi_query=K04564+%23FFFFFF,red%0d%0aK02187+%23FFFFFF,green%0d%0aK02677+%23FFFFFF,red%0d%0a
BP	GO:0030505	inorganic diphosphate transport	0	1	1	2	-	ENSBGRG00000021648(ENPP1)	0.0475634	0.613199		ko05226	Gastric cancer	Human Diseases	Cancer: specific types	0	2	2	128	0.754024	0.915313	-	ENSBGRG00000016563,ENSBGRG00000006944(LEF1)	http://www.kegg.jp/kegg-bin/show_pathway?map=map05226&multi_query=K04492+%23FFFFFF,green%0d%0aK08957+%23FFFFFF,green%0d%0a
BP	GO:0030885	regulation of myeloid dendritic cell activation	0	1	1	2	-	ENSBGRG00000008883(CLEC4D)	0.0475634	0.613199		ko04721	Synaptic vesicle cycle	Organismal Systems	Nervous system	1	0	1	68	0.764648	0.915313	ENSBGRG00000012924(STX3)	-	http://www.kegg.jp/kegg-bin/show_pathway?map=map04721&multi_query=K08486+%23FFFFFF,red%0d%0a
BP	GO:0031022	nuclear migration along microfilament	1	0	1	2	ENSBGRG00000002838(SUN2)	-	0.0475634	0.613199		ko04145	Phagosome	Cellular Processes	Transport and catabolism	1	1	2	131	0.765378	0.915313	ENSBGRG00000019125	ENSBGRG00000000772(COMP)	http://www.kegg.jp/kegg-bin/show_pathway?map=map04145&multi_query=K06752+%23FFFFFF,red%0d%0aK04659+%23FFFFFF,green%0d%0a
BP	GO:0031117	positive regulation of microtubule depolymerization	1	0	1	2	ENSBGRG00000016460(KATNB1)	-	0.0475634	0.613199		ko05224	Breast cancer	Human Diseases	Cancer: specific types	0	2	2	131	0.765378	0.915313	-	ENSBGRG00000016563,ENSBGRG00000006944(LEF1)	http://www.kegg.jp/kegg-bin/show_pathway?map=map05224&multi_query=K08957+%23FFFFFF,green%0d%0aK04492+%23FFFFFF,green%0d%0a
BP	GO:0032966	negative regulation of collagen biosynthetic process	1	0	1	2	ENSBGRG00000012069(EMILIN1)	-	0.0475634	0.613199		ko01521	EGFR tyrosine kinase inhibitor resistance	Human Diseases	Drug resistance: antineoplastic	1	0	1	72	0.78394	0.915313	ENSBGRG00000018161(PRKCA)	-	http://www.kegg.jp/kegg-bin/show_pathway?map=map01521&multi_query=K02677+%23FFFFFF,red%0d%0a
BP	GO:0035781	CD86 biosynthetic process	1	0	1	2	ENSBGRG00000005603(TMEM106A)	-	0.0475634	0.613199		ko04120	Ubiquitin mediated proteolysis	Genetic Information Processing	Folding, sorting and degradation	0	2	2	137	0.786737	0.915313	-	ENSBGRG00000015045(UBE2W),ENSBGRG00000002976(UBE2K)	http://www.kegg.jp/kegg-bin/show_pathway?map=map04120&multi_query=K10688+%23FFFFFF,green%0d%0aK04649+%23FFFFFF,green%0d%0a
BP	GO:0036146	cellular response to mycotoxin	1	0	1	2	ENSBGRG00000000977(CERS1)	-	0.0475634	0.613199		ko05160	Hepatitis C	Human Diseases	Infectious disease: viral	1	1	2	137	0.786737	0.915313	ENSBGRG00000000800(CLDN1)	ENSBGRG00000020580(CASP3)	http://www.kegg.jp/kegg-bin/show_pathway?map=map05160&multi_query=K02187+%23FFFFFF,green%0d%0aK06087+%23FFFFFF,red%0d%0a
BP	GO:0042360	vitamin E metabolic process	1	0	1	2	ENSBGRG00000019666(PLTP)	-	0.0475634	0.613199		ko04012	ErbB signaling pathway	Environmental Information Processing	Signal transduction	1	0	1	73	0.788512	0.915313	ENSBGRG00000018161(PRKCA)	-	http://www.kegg.jp/kegg-bin/show_pathway?map=map04012&multi_query=K02677+%23FFFFFF,red%0d%0a
BP	GO:0046069	cGMP catabolic process	1	0	1	2	ENSBGRG00000019109(PDE9A)	-	0.0475634	0.613199		ko04390	Hippo signaling pathway	Environmental Information Processing	Signal transduction	0	2	2	138	0.790127	0.915313	-	ENSBGRG00000006944(LEF1),ENSBGRG00000025440(SERPINE1)	http://www.kegg.jp/kegg-bin/show_pathway?map=map04390&multi_query=K04492+%23FFFFFF,green%0d%0aK03982+%23FFFFFF,green%0d%0a
BP	GO:0046946	hydroxylysine metabolic process	1	0	1	2	ENSBGRG00000025536(PLOD3)	-	0.0475634	0.613199		ko04010	MAPK signaling pathway	Environmental Information Processing	Signal transduction	3	1	4	257	0.792985	0.915313	ENSBGRG00000018161(PRKCA),ENSBGRG00000008928(VEGFC),ENSBGRG00000017954(CACNG1)	ENSBGRG00000020580(CASP3)	http://www.kegg.jp/kegg-bin/show_pathway?map=map04010&multi_query=K02187+%23FFFFFF,green%0d%0aK05449+%23FFFFFF,red%0d%0aK02677+%23FFFFFF,red%0d%0aK04866+%23FFFFFF,red%0d%0a
BP	GO:0046947	hydroxylysine biosynthetic process	1	0	1	2	ENSBGRG00000025536(PLOD3)	-	0.0475634	0.613199		ko04217	Necroptosis	Cellular Processes	Cell growth and death	1	1	2	141	0.800015	0.915313	ENSBGRG00000026749(SPATA2L)	ENSBGRG00000001762(STAT4)	http://www.kegg.jp/kegg-bin/show_pathway?map=map04217&multi_query=K11222+%23FFFFFF,green%0d%0aK17595+%23FFFFFF,red%0d%0a
BP	GO:0048389	intermediate mesoderm development	1	0	1	2	ENSBGRG00000021840(OSR1)	-	0.0475634	0.613199		ko05208	Chemical carcinogenesis - reactive oxygen species	Human Diseases	Cancer: overview	1	2	3	204	0.80653	0.915313	ENSBGRG00000026571	ENSBGRG00000020093,ENSBGRG00000002112(GSTM3)	http://www.kegg.jp/kegg-bin/show_pathway?map=map05208&multi_query=K00799+%23FFFFFF,green%0d%0aK04564+%23FFFFFF,red%0d%0a
BP	GO:0060023	soft palate development	1	0	1	2	ENSBGRG00000022648(TSHZ1)	-	0.0475634	0.613199		ko04666	Fc gamma R-mediated phagocytosis	Organismal Systems	Immune system	1	0	1	78	0.809971	0.915313	ENSBGRG00000018161(PRKCA)	-	http://www.kegg.jp/kegg-bin/show_pathway?map=map04666&multi_query=K02677+%23FFFFFF,red%0d%0a
BP	GO:0061152	trachea submucosa development	0	1	1	2	-	ENSBGRG00000006944(LEF1)	0.0475634	0.613199		ko04060	Cytokine-cytokine receptor interaction	Environmental Information Processing	Signaling molecules and interaction	2	2	4	265	0.812341	0.915313	ENSBGRG00000007264(TNFSF4),ENSBGRG00000010067(GDF11)	ENSBGRG00000009248(IL12RB2),ENSBGRG00000000298(CD4)	http://www.kegg.jp/kegg-bin/show_pathway?map=map04060&multi_query=K05064+%23FFFFFF,green%0d%0aK06454+%23FFFFFF,green%0d%0aK05469+%23FFFFFF,red%0d%0aK22679+%23FFFFFF,red%0d%0a
BP	GO:0061153	trachea gland development	0	1	1	2	-	ENSBGRG00000006944(LEF1)	0.0475634	0.613199		ko04657	IL-17 signaling pathway	Organismal Systems	Immune system	0	1	1	80	0.817935	0.915313	-	ENSBGRG00000020580(CASP3)	http://www.kegg.jp/kegg-bin/show_pathway?map=map04657&multi_query=K02187+%23FFFFFF,green%0d%0a
BP	GO:0061227	pattern specification involved in mesonephros development	1	0	1	2	ENSBGRG00000021840(OSR1)	-	0.0475634	0.613199		ko05171	Coronavirus disease - COVID-19	Human Diseases	Infectious disease: viral	4	0	4	268	0.819212	0.915313	ENSBGRG00000003430(C1QC),ENSBGRG00000018161(PRKCA),ENSBGRG00000003422(C1QA),ENSBGRG00000016481	-	http://www.kegg.jp/kegg-bin/show_pathway?map=map05171&multi_query=K03986+%23FFFFFF,red%0d%0aK03988+%23FFFFFF,red%0d%0aK02900+%23FFFFFF,red%0d%0aK02677+%23FFFFFF,red%0d%0a
BP	GO:0061713	anterior neural tube closure	0	1	1	2	-	ENSBGRG00000020580(CASP3)	0.0475634	0.613199		ko04151	PI3K-Akt signaling pathway	Environmental Information Processing	Signal transduction	4	1	5	326	0.820197	0.915313	ENSBGRG00000013185(IRS1),ENSBGRG00000018161(PRKCA),ENSBGRG00000000863(COL6A2),ENSBGRG00000008928(VEGFC)	ENSBGRG00000000772(COMP)	http://www.kegg.jp/kegg-bin/show_pathway?map=map04151&multi_query=K05449+%23FFFFFF,red%0d%0aK04659+%23FFFFFF,green%0d%0aK16172+%23FFFFFF,red%0d%0aK02677+%23FFFFFF,red%0d%0aK06238+%23FFFFFF,red%0d%0a
BP	GO:0070256	negative regulation of mucus secretion	1	0	1	2	ENSBGRG00000026296(ADORA1)	-	0.0475634	0.613199		ko04530	Tight junction	Cellular Processes	Cellular community - eukaryotes	1	1	2	148	0.821508	0.915313	ENSBGRG00000000800(CLDN1)	ENSBGRG00000003715(RAB8B)	http://www.kegg.jp/kegg-bin/show_pathway?map=map04530&multi_query=K06087+%23FFFFFF,red%0d%0aK07902+%23FFFFFF,green%0d%0a
BP	GO:0071839	apoptotic process in bone marrow cell	0	1	1	2	-	ENSBGRG00000006944(LEF1)	0.0475634	0.613199		ko04350	TGF-beta signaling pathway	Environmental Information Processing	Signal transduction	1	0	1	82	0.825568	0.915313	ENSBGRG00000004562(ID3)	-	http://www.kegg.jp/kegg-bin/show_pathway?map=map04350&multi_query=K17694+%23FFFFFF,red%0d%0a
BP	GO:0071865	regulation of apoptotic process in bone marrow cell	0	1	1	2	-	ENSBGRG00000006944(LEF1)	0.0475634	0.613199		ko04914	Progesterone-mediated oocyte maturation	Organismal Systems	Endocrine system	0	1	1	82	0.825568	0.915313	-	ENSBGRG00000001555(GNAI3)	http://www.kegg.jp/kegg-bin/show_pathway?map=map04914&multi_query=K04630+%23FFFFFF,green%0d%0a
BP	GO:0071866	negative regulation of apoptotic process in bone marrow cell	0	1	1	2	-	ENSBGRG00000006944(LEF1)	0.0475634	0.613199		ko05410	Hypertrophic cardiomyopathy	Human Diseases	Cardiovascular disease	1	0	1	83	0.829265	0.915313	ENSBGRG00000017954(CACNG1)	-	http://www.kegg.jp/kegg-bin/show_pathway?map=map05410&multi_query=K04866+%23FFFFFF,red%0d%0a
BP	GO:0071895	odontoblast differentiation	0	1	1	2	-	ENSBGRG00000025440(SERPINE1)	0.0475634	0.613199		ko04361	Axon regeneration	Organismal Systems	Development and regeneration	0	1	1	83	0.829265	0.915313	-	ENSBGRG00000021516(GNAO1)	http://www.kegg.jp/kegg-bin/show_pathway?map=map04361&multi_query=K04534+%23FFFFFF,green%0d%0a
BP	GO:0072071	kidney interstitial fibroblast differentiation	1	0	1	2	ENSBGRG00000021840(OSR1)	-	0.0475634	0.613199		ko04260	Cardiac muscle contraction	Organismal Systems	Circulatory system	1	0	1	83	0.829265	0.915313	ENSBGRG00000017954(CACNG1)	-	http://www.kegg.jp/kegg-bin/show_pathway?map=map04260&multi_query=K04866+%23FFFFFF,red%0d%0a
BP	GO:0072098	anterior/posterior pattern specification involved in kidney development	1	0	1	2	ENSBGRG00000021840(OSR1)	-	0.0475634	0.613199		ko04014	Ras signaling pathway	Environmental Information Processing	Signal transduction	2	1	3	215	0.834088	0.915313	ENSBGRG00000008928(VEGFC),ENSBGRG00000018161(PRKCA)	ENSBGRG00000015132(RASSF5)	http://www.kegg.jp/kegg-bin/show_pathway?map=map04014&multi_query=K05449+%23FFFFFF,red%0d%0aK08015+%23FFFFFF,green%0d%0aK02677+%23FFFFFF,red%0d%0a
BP	GO:0072141	renal interstitial fibroblast development	1	0	1	2	ENSBGRG00000021840(OSR1)	-	0.0475634	0.613199		ko04013	MAPK signaling pathway - fly	Environmental Information Processing	Signal transduction	1	0	1	85	0.836426	0.915313	ENSBGRG00000026571	-	http://www.kegg.jp/kegg-bin/show_pathway?map=map04013&multi_query=K04564+%23FFFFFF,red%0d%0a
BP	GO:0072162	metanephric mesenchymal cell differentiation	1	0	1	2	ENSBGRG00000021840(OSR1)	-	0.0475634	0.613199		ko05235	PD-L1 expression and PD-1 checkpoint pathway in cancer	Human Diseases	Cancer: overview	0	1	1	85	0.836426	0.915313	-	ENSBGRG00000000298(CD4)	http://www.kegg.jp/kegg-bin/show_pathway?map=map05235&multi_query=K06454+%23FFFFFF,green%0d%0a
BP	GO:0072208	metanephric smooth muscle tissue development	1	0	1	2	ENSBGRG00000021840(OSR1)	-	0.0475634	0.613199		ko04932	Non-alcoholic fatty liver disease	Human Diseases	Endocrine and metabolic disease	1	1	2	154	0.838267	0.915313	ENSBGRG00000013185(IRS1)	ENSBGRG00000020580(CASP3)	http://www.kegg.jp/kegg-bin/show_pathway?map=map04932&multi_query=K16172+%23FFFFFF,red%0d%0aK02187+%23FFFFFF,green%0d%0a
BP	GO:0072289	metanephric nephron tubule formation	1	0	1	2	ENSBGRG00000007158(SOX8)	-	0.0475634	0.613199		ko05414	Dilated cardiomyopathy	Human Diseases	Cardiovascular disease	1	0	1	86	0.839894	0.915313	ENSBGRG00000017954(CACNG1)	-	http://www.kegg.jp/kegg-bin/show_pathway?map=map05414&multi_query=K04866+%23FFFFFF,red%0d%0a
BP	GO:0072720	response to dithiothreitol	1	0	1	2	ENSBGRG00000000977(CERS1)	-	0.0475634	0.613199		ko04625	C-type lectin receptor signaling pathway	Organismal Systems	Immune system	0	1	1	89	0.849865	0.920058	-	ENSBGRG00000008883(CLEC4D)	http://www.kegg.jp/kegg-bin/show_pathway?map=map04625&multi_query=K10058+%23FFFFFF,green%0d%0a
BP	GO:0097187	dentinogenesis	0	1	1	2	-	ENSBGRG00000025440(SERPINE1)	0.0475634	0.613199		ko04630	JAK-STAT signaling pathway	Environmental Information Processing	Signal transduction	0	2	2	159	0.851139	0.920058	-	ENSBGRG00000009248(IL12RB2),ENSBGRG00000001762(STAT4)	http://www.kegg.jp/kegg-bin/show_pathway?map=map04630&multi_query=K05064+%23FFFFFF,green%0d%0aK11222+%23FFFFFF,green%0d%0a
BP	GO:0150064	vertebrate eye-specific patterning	1	0	1	2	ENSBGRG00000003422(C1QA)	-	0.0475634	0.613199		ko00564	Glycerophospholipid metabolism	Metabolism	Lipid metabolism	1	0	1	91	0.856167	0.92176	ENSBGRG00000005249(CHKB)	-	http://www.kegg.jp/kegg-bin/show_pathway?map=map00564&multi_query=K14156+%23FFFFFF,red%0d%0a
BP	GO:1900453	negative regulation of long-term synaptic depression	1	0	1	2	ENSBGRG00000026296(ADORA1)	-	0.0475634	0.613199		ko05323	Rheumatoid arthritis	Human Diseases	Immune disease	1	0	1	96	0.870796	0.933745	ENSBGRG00000019125	-	http://www.kegg.jp/kegg-bin/show_pathway?map=map05323&multi_query=K06752+%23FFFFFF,red%0d%0a
BP	GO:1901387	positive regulation of voltage-gated calcium channel activity	1	0	1	2	ENSBGRG00000012958(STAC2)	-	0.0475634	0.613199		ko04660	T cell receptor signaling pathway	Organismal Systems	Immune system	0	1	1	98	0.876224	0.935808	-	ENSBGRG00000000298(CD4)	http://www.kegg.jp/kegg-bin/show_pathway?map=map04660&multi_query=K06454+%23FFFFFF,green%0d%0a
BP	GO:1901492	positive regulation of lymphangiogenesis	1	0	1	2	ENSBGRG00000008928(VEGFC)	-	0.0475634	0.613199		ko05020	Prion disease	Human Diseases	Neurodegenerative disease	2	1	3	244	0.89117	0.947978	ENSBGRG00000003422(C1QA),ENSBGRG00000003430(C1QC)	ENSBGRG00000020580(CASP3)	http://www.kegg.jp/kegg-bin/show_pathway?map=map05020&multi_query=K03986+%23FFFFFF,red%0d%0aK03988+%23FFFFFF,red%0d%0aK02187+%23FFFFFF,green%0d%0a
BP	GO:1903004	regulation of protein K63-linked deubiquitination	1	0	1	2	ENSBGRG00000025223(NOP53)	-	0.0475634	0.613199		ko04722	Neurotrophin signaling pathway	Organismal Systems	Nervous system	1	0	1	107	0.897981	0.951432	ENSBGRG00000013185(IRS1)	-	http://www.kegg.jp/kegg-bin/show_pathway?map=map04722&multi_query=K16172+%23FFFFFF,red%0d%0a
BP	GO:1903006	positive regulation of protein K63-linked deubiquitination	1	0	1	2	ENSBGRG00000025223(NOP53)	-	0.0475634	0.613199		ko03010	Ribosome	Genetic Information Processing	Translation	2	0	2	186	0.905903	0.956032	ENSBGRG00000019931(MRPL2),ENSBGRG00000016481	-	http://www.kegg.jp/kegg-bin/show_pathway?map=map03010&multi_query=K02900+%23FFFFFF,red%0d%0aK02886+%23FFFFFF,red%0d%0a
BP	GO:1904027	negative regulation of collagen fibril organization	1	0	1	2	ENSBGRG00000012069(EMILIN1)	-	0.0475634	0.613199		ko04210	Apoptosis	Cellular Processes	Cell growth and death	0	1	1	116	0.915934	0.962524	-	ENSBGRG00000020580(CASP3)	http://www.kegg.jp/kegg-bin/show_pathway?map=map04210&multi_query=K02187+%23FFFFFF,green%0d%0a
BP	GO:1904054	regulation of cholangiocyte proliferation	1	0	1	2	ENSBGRG00000021566(PKHD1)	-	0.0475634	0.613199		ko05169	Epstein-Barr virus infection	Human Diseases	Infectious disease: viral	1	1	2	195	0.919538	0.962524	ENSBGRG00000019125	ENSBGRG00000020580(CASP3)	http://www.kegg.jp/kegg-bin/show_pathway?map=map05169&multi_query=K06752+%23FFFFFF,red%0d%0aK02187+%23FFFFFF,green%0d%0a
BP	GO:1904204	regulation of skeletal muscle hypertrophy	1	0	1	2	ENSBGRG00000002228(IGFBP5)	-	0.0475634	0.613199		ko04110	Cell cycle	Cellular Processes	Cell growth and death	1	0	1	120	0.922869	0.962524	ENSBGRG00000007727(CDKN2C)	-	http://www.kegg.jp/kegg-bin/show_pathway?map=map04110&multi_query=K06622+%23FFFFFF,red%0d%0a
BP	GO:1904220	regulation of serine C-palmitoyltransferase activity	1	0	1	2	ENSBGRG00000021074(ORMDL3)	-	0.0475634	0.613199		ko04550	Signaling pathways regulating pluripotency of stem cells	Cellular Processes	Cellular community - eukaryotes	1	0	1	127	0.933666	0.968347	ENSBGRG00000004562(ID3)	-	http://www.kegg.jp/kegg-bin/show_pathway?map=map04550&multi_query=K17694+%23FFFFFF,red%0d%0a
BP	GO:1904426	positive regulation of GTP binding	0	1	1	2	-	ENSBGRG00000021575(CLN5)	0.0475634	0.613199		ko04072	Phospholipase D signaling pathway	Environmental Information Processing	Signal transduction	1	0	1	129	0.936465	0.968347	ENSBGRG00000018161(PRKCA)	-	http://www.kegg.jp/kegg-bin/show_pathway?map=map04072&multi_query=K02677+%23FFFFFF,red%0d%0a
BP	GO:1905407	regulation of creatine transmembrane transporter activity	1	0	1	2	ENSBGRG00000021840(OSR1)	-	0.0475634	0.613199		ko05135	Yersinia infection	Human Diseases	Infectious disease: bacterial	0	1	1	132	0.940445	0.968347	-	ENSBGRG00000000298(CD4)	http://www.kegg.jp/kegg-bin/show_pathway?map=map05135&multi_query=K06454+%23FFFFFF,green%0d%0a
BP	GO:1905408	negative regulation of creatine transmembrane transporter activity	1	0	1	2	ENSBGRG00000021840(OSR1)	-	0.0475634	0.613199		ko05162	Measles	Human Diseases	Infectious disease: viral	0	1	1	134	0.94296	0.968347	-	ENSBGRG00000020580(CASP3)	http://www.kegg.jp/kegg-bin/show_pathway?map=map05162&multi_query=K02187+%23FFFFFF,green%0d%0a
BP	GO:1905793	protein localization to pericentriolar material	1	0	1	2	ENSBGRG00000013980(NUDCD3)	-	0.0475634	0.613199		ko04714	Thermogenesis	Organismal Systems	Environmental adaptation	1	1	2	219	0.947405	0.969185	ENSBGRG00000023169(CPT1C)	ENSBGRG00000003576(KLB)	http://www.kegg.jp/kegg-bin/show_pathway?map=map04714&multi_query=K19524+%23FFFFFF,red%0d%0aK22404+%23FFFFFF,green%0d%0a
BP	GO:1990314	cellular response to insulin-like growth factor stimulus	0	1	1	2	-	ENSBGRG00000011115(SLC25A33)	0.0475634	0.613199		ko04144	Endocytosis	Cellular Processes	Transport and catabolism	2	0	2	225	0.952785	0.970968	ENSBGRG00000013061,ENSBGRG00000015277	-	http://www.kegg.jp/kegg-bin/show_pathway?map=map04144&multi_query=K12484+%23FFFFFF,red%0d%0aK18461+%23FFFFFF,red%0d%0a
BP	GO:2000098	negative regulation of smooth muscle cell-matrix adhesion	0	1	1	2	-	ENSBGRG00000025440(SERPINE1)	0.0475634	0.613199		ko05012	Parkinson disease	Human Diseases	Neurodegenerative disease	0	2	2	237	0.962017	0.975486	-	ENSBGRG00000001555(GNAI3),ENSBGRG00000020580(CASP3)	http://www.kegg.jp/kegg-bin/show_pathway?map=map05012&multi_query=K02187+%23FFFFFF,green%0d%0aK04630+%23FFFFFF,green%0d%0a
BP	GO:2000297	negative regulation of synapse maturation	1	0	1	2	ENSBGRG00000026704(ARHGEF15)	-	0.0475634	0.613199		ko04062	Chemokine signaling pathway	Organismal Systems	Immune system	0	1	1	157	0.9653	0.975486	-	ENSBGRG00000001555(GNAI3)	http://www.kegg.jp/kegg-bin/show_pathway?map=map04062&multi_query=K04630+%23FFFFFF,green%0d%0a
BP	GO:2000848	positive regulation of corticosteroid hormone secretion	1	0	1	2	ENSBGRG00000019832(C1QTNF1)	-	0.0475634	0.613199		ko04141	Protein processing in endoplasmic reticulum	Genetic Information Processing	Folding, sorting and degradation	1	0	1	161	0.968179	0.975486	ENSBGRG00000013275(HSPBP1)	-	http://www.kegg.jp/kegg-bin/show_pathway?map=map04141&multi_query=K09562+%23FFFFFF,red%0d%0a
BP	GO:2000855	regulation of mineralocorticoid secretion	1	0	1	2	ENSBGRG00000019832(C1QTNF1)	-	0.0475634	0.613199		ko04810	Regulation of actin cytoskeleton	Cellular Processes	Cell motility	1	0	1	193	0.984112	0.987812	ENSBGRG00000010518(MYLK4)	-	http://www.kegg.jp/kegg-bin/show_pathway?map=map04810&multi_query=K00907+%23FFFFFF,red%0d%0a
BP	GO:2000858	regulation of aldosterone secretion	1	0	1	2	ENSBGRG00000019832(C1QTNF1)	-	0.0475634	0.613199		ko04740	Olfactory transduction	Organismal Systems	Sensory system	1	0	1	589	0.999998	0.999998	ENSBGRG00000013014	-	http://www.kegg.jp/kegg-bin/show_pathway?map=map04740&multi_query=K04257+%23FFFFFF,red%0d%0a
BP	GO:2001013	epithelial cell proliferation involved in renal tubule morphogenesis	1	0	1	2	ENSBGRG00000013522(LGR5)	-	0.0475634	0.613199
BP	GO:0043467	regulation of generation of precursor metabolites and energy	3	2	5	82	ENSBGRG00000013185(IRS1),ENSBGRG00000020868(HTR2A),ENSBGRG00000025223(NOP53)	ENSBGRG00000011115(SLC25A33),ENSBGRG00000021648(ENPP1)	0.047617	0.613199
BP	GO:0006111	regulation of gluconeogenesis	2	1	3	34	ENSBGRG00000010063(C1QTNF3),ENSBGRG00000020745(PGP)	ENSBGRG00000012579(FOXO1)	0.0477443	0.613199
BP	GO:0030166	proteoglycan biosynthetic process	2	1	3	34	ENSBGRG00000006039(XYLT2),ENSBGRG00000019378(CHPF)	ENSBGRG00000020997(GLCE)	0.0477443	0.613199
BP	GO:0090183	regulation of kidney development	3	0	3	34	ENSBGRG00000006516(SIX2),ENSBGRG00000007158(SOX8),ENSBGRG00000021840(OSR1)	-	0.0477443	0.613199
BP	GO:0099072	regulation of postsynaptic membrane neurotransmitter receptor levels	3	0	3	34	ENSBGRG00000010087(NSG1),ENSBGRG00000012924(STX3),ENSBGRG00000023169(CPT1C)	-	0.0477443	0.613199
BP	GO:0001649	osteoblast differentiation	6	1	7	137	ENSBGRG00000002228(IGFBP5),ENSBGRG00000004562(ID3),ENSBGRG00000007158(SOX8),ENSBGRG00000008928(VEGFC),ENSBGRG00000009028(ZHX3),ENSBGRG00000023703(HDAC7)	ENSBGRG00000006944(LEF1)	0.0477506	0.613199
BP	GO:0003094	glomerular filtration	2	0	2	15	ENSBGRG00000009308(KIRREL1),ENSBGRG00000026296(ADORA1)	-	0.0493366	0.613199
BP	GO:0005979	regulation of glycogen biosynthetic process	1	1	2	15	ENSBGRG00000013185(IRS1)	ENSBGRG00000021648(ENPP1)	0.0493366	0.613199
BP	GO:0010962	regulation of glucan biosynthetic process	1	1	2	15	ENSBGRG00000013185(IRS1)	ENSBGRG00000021648(ENPP1)	0.0493366	0.613199
BP	GO:0014912	negative regulation of smooth muscle cell migration	1	1	2	15	ENSBGRG00000002228(IGFBP5)	ENSBGRG00000025440(SERPINE1)	0.0493366	0.613199
BP	GO:0032703	negative regulation of interleukin-2 production	2	0	2	15	ENSBGRG00000007767(NAV3),ENSBGRG00000023703(HDAC7)	-	0.0493366	0.613199
BP	GO:0035561	regulation of chromatin binding	1	1	2	15	ENSBGRG00000009080(PYGO2)	ENSBGRG00000007330(PARP9)	0.0493366	0.613199
BP	GO:0043574	peroxisomal transport	1	1	2	15	ENSBGRG00000010057(PEX16)	ENSBGRG00000003715(RAB8B)	0.0493366	0.613199
BP	GO:0060307	regulation of ventricular cardiac muscle cell membrane repolarization	2	0	2	15	ENSBGRG00000006075(SNTA1),ENSBGRG00000022985(SCN4B)	-	0.0493366	0.613199
BP	GO:0060438	trachea development	1	1	2	15	ENSBGRG00000002743(RARG)	ENSBGRG00000006944(LEF1)	0.0493366	0.613199
BP	GO:0061217	regulation of mesonephros development	2	0	2	15	ENSBGRG00000006516(SIX2),ENSBGRG00000007158(SOX8)	-	0.0493366	0.613199
BP	GO:0001823	mesonephros development	5	0	5	83	ENSBGRG00000000399(CRLF1),ENSBGRG00000006516(SIX2),ENSBGRG00000007158(SOX8),ENSBGRG00000010067(GDF11),ENSBGRG00000021840(OSR1)	-	0.0497157	0.613199
CC	GO:0005576	extracellular region	44	10	54	1176	ENSBGRG00000000399(CRLF1),ENSBGRG00000000863(COL6A2),ENSBGRG00000000934(ADAMTSL4),ENSBGRG00000002127(OLFML2B),ENSBGRG00000002228(IGFBP5),ENSBGRG00000002440(IGFBP6),ENSBGRG00000003011(PODN),ENSBGRG00000003400(KIF20A),ENSBGRG00000003422(C1QA),ENSBGRG00000003430(C1QC),ENSBGRG00000005255(COL5A1),ENSBGRG00000005880(VSTM2L),ENSBGRG00000006039(XYLT2),ENSBGRG00000006670(MTUS2),ENSBGRG00000007264(TNFSF4),…	ENSBGRG00000000772(COMP),ENSBGRG00000002112(GSTM3),ENSBGRG00000006702(GPX3),ENSBGRG00000007052(NTN4),ENSBGRG00000009561(COL11A1),ENSBGRG00000010677(VIT),ENSBGRG00000010987(ANGPTL7),ENSBGRG00000021447(ERFE),ENSBGRG00000021648(ENPP1),ENSBGRG00000025440(SERPINE1)	6.27887e-07	0.000260485
CC	GO:0031012	extracellular matrix	14	4	18	204	ENSBGRG00000000863(COL6A2),ENSBGRG00000000934(ADAMTSL4),ENSBGRG00000002127(OLFML2B),ENSBGRG00000005255(COL5A1),ENSBGRG00000012069(EMILIN1),ENSBGRG00000013383(ELN),ENSBGRG00000014092(SOD3),ENSBGRG00000014725(MMP15),ENSBGRG00000019277(NID1),ENSBGRG00000020183(COL15A1),ENSBGRG00000023889(MMP2),ENSBGRG00000024818(MMP23B),ENSBGRG00000025536(PLOD3),ENSBGRG00000025584(CILP)	ENSBGRG00000007052(NTN4),ENSBGRG00000009561(COL11A1),ENSBGRG00000010677(VIT),ENSBGRG00000025440(SERPINE1)	1.16548e-06	0.000260485
CC	GO:0005615	extracellular space	27	5	32	573	ENSBGRG00000000399(CRLF1),ENSBGRG00000002228(IGFBP5),ENSBGRG00000002440(IGFBP6),ENSBGRG00000003011(PODN),ENSBGRG00000003422(C1QA),ENSBGRG00000003430(C1QC),ENSBGRG00000006039(XYLT2),ENSBGRG00000007264(TNFSF4),ENSBGRG00000008928(VEGFC),ENSBGRG00000010067(GDF11),ENSBGRG00000010704(VASH1),ENSBGRG00000012069(EMILIN1),ENSBGRG00000013438(CNP),ENSBGRG00000014092(SOD3),ENSBGRG00000018787(GPRC5B),ENSBGRG00…	ENSBGRG00000000772(COMP),ENSBGRG00000006702(GPX3),ENSBGRG00000021447(ERFE),ENSBGRG00000021648(ENPP1),ENSBGRG00000025440(SERPINE1)	3.34543e-06	0.000498469
CC	GO:0062023	collagen-containing extracellular matrix	9	4	13	133	ENSBGRG00000000934(ADAMTSL4),ENSBGRG00000005255(COL5A1),ENSBGRG00000012069(EMILIN1),ENSBGRG00000013383(ELN),ENSBGRG00000014092(SOD3),ENSBGRG00000019277(NID1),ENSBGRG00000020183(COL15A1),ENSBGRG00000025536(PLOD3),ENSBGRG00000025584(CILP)	ENSBGRG00000007052(NTN4),ENSBGRG00000009561(COL11A1),ENSBGRG00000010677(VIT),ENSBGRG00000025440(SERPINE1)	1.21637e-05	0.00135929
CC	GO:0062167	complement component C1q complex	2	0	2	2	ENSBGRG00000003422(C1QA),ENSBGRG00000003430(C1QC)	-	0.000531398	0.047507
CC	GO:0032580	Golgi cisterna membrane	3	0	3	10	ENSBGRG00000006836(CHPF2),ENSBGRG00000019378(CHPF),ENSBGRG00000024660(TMEM115)	-	0.00129633	0.0831967
CC	GO:0005783	endoplasmic reticulum	21	9	30	722	ENSBGRG00000000977(CERS1),ENSBGRG00000003388(GPX7),ENSBGRG00000003997(PEDS1),ENSBGRG00000005206(TMED1),ENSBGRG00000009321(RETREG3),ENSBGRG00000010057(PEX16),ENSBGRG00000010087(NSG1),ENSBGRG00000010363(GRINA),ENSBGRG00000010704(VASH1),ENSBGRG00000010797(FKBP10),ENSBGRG00000010913(GPAA1),ENSBGRG00000011587(MZB1),ENSBGRG00000012878(JPH2),ENSBGRG00000016878(MOGAT1),ENSBGRG00000018161(PRKCA),ENSBGRG00…	ENSBGRG00000000298(CD4),ENSBGRG00000001644(SNX10),ENSBGRG00000001715(CAMLG),ENSBGRG00000002196(MTTP),ENSBGRG00000002470(DNAJB14),ENSBGRG00000004396(LACC1),ENSBGRG00000014709(TECRL),ENSBGRG00000019549(OTULINL),ENSBGRG00000021575(CLN5)	0.00130286	0.0831967
CC	GO:0008282	inward rectifying potassium channel	2	0	2	3	ENSBGRG00000009694(KCNJ11),ENSBGRG00000009791(ABCC8)	-	0.00156982	0.0877137
CC	GO:1990393	3M complex	2	0	2	4	ENSBGRG00000018249(CCDC8),ENSBGRG00000018601(OBSL1)	-	0.00309172	0.153556
CC	GO:0016942	insulin-like growth factor binding protein complex	2	0	2	5	ENSBGRG00000002228(IGFBP5),ENSBGRG00000002440(IGFBP6)	-	0.00507438	0.226825
CC	GO:0034702	ion channel complex	9	1	10	174	ENSBGRG00000009694(KCNJ11),ENSBGRG00000009791(ABCC8),ENSBGRG00000011193(KCNA6),ENSBGRG00000012223(KCNC1),ENSBGRG00000017954(CACNG1),ENSBGRG00000022985(SCN4B),ENSBGRG00000023169(CPT1C),ENSBGRG00000025509(KCNB1),ENSBGRG00000026391(CLCN7)	ENSBGRG00000018731(STXBP5)	0.00717394	0.239332
CC	GO:0070062	extracellular exosome	4	1	5	53	ENSBGRG00000018787(GPRC5B),ENSBGRG00000021046(SNX18),ENSBGRG00000021566(PKHD1),ENSBGRG00000026388(ALDOA)	ENSBGRG00000025440(SERPINE1)	0.00736373	0.239332
CC	GO:0030688	preribosome, small subunit precursor	2	0	2	6	ENSBGRG00000000257(SLX9),ENSBGRG00000021680(RRP1)	-	0.00749585	0.239332
CC	GO:0036454	growth factor complex	2	0	2	6	ENSBGRG00000002228(IGFBP5),ENSBGRG00000002440(IGFBP6)	-	0.00749585	0.239332
CC	GO:0000139	Golgi membrane	8	1	9	153	ENSBGRG00000006836(CHPF2),ENSBGRG00000012759(MGAT1),ENSBGRG00000013522(LGR5),ENSBGRG00000019378(CHPF),ENSBGRG00000024660(TMEM115),ENSBGRG00000025151(MARCHF2),ENSBGRG00000025283(SCAMP2),ENSBGRG00000026390(CABP1)	ENSBGRG00000001555(GNAI3)	0.00909881	0.271145
CC	GO:1903561	extracellular vesicle	4	1	5	58	ENSBGRG00000018787(GPRC5B),ENSBGRG00000021046(SNX18),ENSBGRG00000021566(PKHD1),ENSBGRG00000026388(ALDOA)	ENSBGRG00000025440(SERPINE1)	0.010715	0.298781
CC	GO:1902495	transmembrane transporter complex	9	1	10	188	ENSBGRG00000009694(KCNJ11),ENSBGRG00000009791(ABCC8),ENSBGRG00000011193(KCNA6),ENSBGRG00000012223(KCNC1),ENSBGRG00000017954(CACNG1),ENSBGRG00000022985(SCN4B),ENSBGRG00000023169(CPT1C),ENSBGRG00000025509(KCNB1),ENSBGRG00000026391(CLCN7)	ENSBGRG00000018731(STXBP5)	0.0120035	0.298781
CC	GO:0043230	extracellular organelle	4	1	5	60	ENSBGRG00000018787(GPRC5B),ENSBGRG00000021046(SNX18),ENSBGRG00000021566(PKHD1),ENSBGRG00000026388(ALDOA)	ENSBGRG00000025440(SERPINE1)	0.0123066	0.298781
CC	GO:0005583	fibrillar collagen trimer	1	1	2	8	ENSBGRG00000005255(COL5A1)	ENSBGRG00000009561(COL11A1)	0.0135712	0.298781
CC	GO:0098643	banded collagen fibril	1	1	2	8	ENSBGRG00000005255(COL5A1)	ENSBGRG00000009561(COL11A1)	0.0135712	0.298781
CC	GO:0032433	filopodium tip	1	1	2	9	ENSBGRG00000018805(MORN4)	ENSBGRG00000002976(UBE2K)	0.017185	0.298781
CC	GO:0032809	neuronal cell body membrane	2	0	2	9	ENSBGRG00000012223(KCNC1),ENSBGRG00000025509(KCNB1)	-	0.017185	0.298781
CC	GO:0034705	potassium channel complex	5	0	5	66	ENSBGRG00000009694(KCNJ11),ENSBGRG00000009791(ABCC8),ENSBGRG00000011193(KCNA6),ENSBGRG00000012223(KCNC1),ENSBGRG00000025509(KCNB1)	-	0.0180235	0.298781
CC	GO:0005887	integral component of plasma membrane	18	4	22	595	ENSBGRG00000002816(SLC6A17),ENSBGRG00000005556(VAMP5),ENSBGRG00000008364(ORAI1),ENSBGRG00000009361(STAB1),ENSBGRG00000009694(KCNJ11),ENSBGRG00000009791(ABCC8),ENSBGRG00000011193(KCNA6),ENSBGRG00000012069(EMILIN1),ENSBGRG00000012223(KCNC1),ENSBGRG00000012398(P2RY1),ENSBGRG00000013522(LGR5),ENSBGRG00000014725(MMP15),ENSBGRG00000018072(HTR4),ENSBGRG00000019832(C1QTNF1),ENSBGRG00000020868(HTR2A),ENSB…	ENSBGRG00000000298(CD4),ENSBGRG00000004152(SLC28A3),ENSBGRG00000007032(IYD),ENSBGRG00000018731(STXBP5)	0.0200552	0.298781
CC	GO:1990351	transporter complex	9	1	10	205	ENSBGRG00000009694(KCNJ11),ENSBGRG00000009791(ABCC8),ENSBGRG00000011193(KCNA6),ENSBGRG00000012223(KCNC1),ENSBGRG00000017954(CACNG1),ENSBGRG00000022985(SCN4B),ENSBGRG00000023169(CPT1C),ENSBGRG00000025509(KCNB1),ENSBGRG00000026391(CLCN7)	ENSBGRG00000018731(STXBP5)	0.0207762	0.298781
CC	GO:0016272	prefoldin complex	1	1	2	10	ENSBGRG00000016804(PDRG1)	ENSBGRG00000001061	0.0211571	0.298781
CC	GO:0031985	Golgi cisterna	3	0	3	26	ENSBGRG00000006836(CHPF2),ENSBGRG00000019378(CHPF),ENSBGRG00000024660(TMEM115)	-	0.0213967	0.298781
CC	GO:0005592	collagen type XI trimer	0	1	1	1	-	ENSBGRG00000009561(COL11A1)	0.023091	0.298781
CC	GO:0034668	integrin alpha4-beta1 complex	1	0	1	1	ENSBGRG00000012069(EMILIN1)	-	0.023091	0.298781
CC	GO:0042568	insulin-like growth factor binary complex	1	0	1	1	ENSBGRG00000002440(IGFBP6)	-	0.023091	0.298781
CC	GO:0097058	CRLF-CLCF1 complex	1	0	1	1	ENSBGRG00000000399(CRLF1)	-	0.023091	0.298781
CC	GO:0098674	extrinsic component of neuronal dense core vesicle membrane	0	1	1	1	-	ENSBGRG00000018731(STXBP5)	0.023091	0.298781
CC	GO:0098922	extrinsic component of dense core granule membrane	0	1	1	1	-	ENSBGRG00000018731(STXBP5)	0.023091	0.298781
CC	GO:1990971	EMILIN complex	1	0	1	1	ENSBGRG00000012069(EMILIN1)	-	0.023091	0.298781
CC	GO:0034703	cation channel complex	8	0	8	152	ENSBGRG00000009694(KCNJ11),ENSBGRG00000009791(ABCC8),ENSBGRG00000011193(KCNA6),ENSBGRG00000012223(KCNC1),ENSBGRG00000017954(CACNG1),ENSBGRG00000022985(SCN4B),ENSBGRG00000023169(CPT1C),ENSBGRG00000025509(KCNB1)	-	0.0247553	0.298781
CC	GO:0005614	interstitial matrix	1	1	2	11	ENSBGRG00000000934(ADAMTSL4)	ENSBGRG00000010677(VIT)	0.0254693	0.298781
CC	GO:0044298	cell body membrane	2	0	2	11	ENSBGRG00000012223(KCNC1),ENSBGRG00000025509(KCNB1)	-	0.0254693	0.298781
CC	GO:1990907	beta-catenin-TCF complex	1	1	2	11	ENSBGRG00000009080(PYGO2)	ENSBGRG00000006944(LEF1)	0.0254693	0.298781
CC	GO:0031312	extrinsic component of organelle membrane	0	3	3	28	-	ENSBGRG00000001644(SNX10),ENSBGRG00000018731(STXBP5),ENSBGRG00000019549(OTULINL)	0.0260681	0.298781
CC	GO:0098794	postsynapse	10	0	10	221	ENSBGRG00000003422(C1QA),ENSBGRG00000003430(C1QC),ENSBGRG00000006075(SNTA1),ENSBGRG00000010087(NSG1),ENSBGRG00000012924(STX3),ENSBGRG00000023169(CPT1C),ENSBGRG00000025467(KPTN),ENSBGRG00000026296(ADORA1),ENSBGRG00000026390(CABP1),ENSBGRG00000026803(SEMA4C)	-	0.0326349	0.364695
CC	GO:0032426	stereocilium tip	1	1	2	13	ENSBGRG00000018805(MORN4)	ENSBGRG00000004809(PKHD1L1)	0.0350437	0.382062
CC	GO:0001891	phagocytic cup	2	0	2	14	ENSBGRG00000001095(SH3BP1),ENSBGRG00000007398(PEAR1)	-	0.0402724	0.39348
CC	GO:0031226	intrinsic component of plasma membrane	18	4	22	643	ENSBGRG00000002816(SLC6A17),ENSBGRG00000005556(VAMP5),ENSBGRG00000008364(ORAI1),ENSBGRG00000009361(STAB1),ENSBGRG00000009694(KCNJ11),ENSBGRG00000009791(ABCC8),ENSBGRG00000011193(KCNA6),ENSBGRG00000012069(EMILIN1),ENSBGRG00000012223(KCNC1),ENSBGRG00000012398(P2RY1),ENSBGRG00000013522(LGR5),ENSBGRG00000014725(MMP15),ENSBGRG00000018072(HTR4),ENSBGRG00000019832(C1QTNF1),ENSBGRG00000020868(HTR2A),ENSB…	ENSBGRG00000000298(CD4),ENSBGRG00000004152(SLC28A3),ENSBGRG00000007032(IYD),ENSBGRG00000018731(STXBP5)	0.0423207	0.39348
CC	GO:0005604	basement membrane	3	1	4	58	ENSBGRG00000005255(COL5A1),ENSBGRG00000019277(NID1),ENSBGRG00000020183(COL15A1)	ENSBGRG00000007052(NTN4)	0.0446802	0.39348
CC	GO:0005854	nascent polypeptide-associated complex	1	0	1	2	ENSBGRG00000019261	-	0.0456506	0.39348
CC	GO:0009368	endopeptidase Clp complex	1	0	1	2	ENSBGRG00000000753(CLPP)	-	0.0456506	0.39348
CC	GO:0035339	SPOTS complex	1	0	1	2	ENSBGRG00000021074(ORMDL3)	-	0.0456506	0.39348
CC	GO:0042272	nuclear RNA export factor complex	0	1	1	2	-	ENSBGRG00000022186(NXT2)	0.0456506	0.39348
CC	GO:0043529	GET complex	0	1	1	2	-	ENSBGRG00000001715(CAMLG)	0.0456506	0.39348
CC	GO:0098871	postsynaptic actin cytoskeleton	1	0	1	2	ENSBGRG00000025467(KPTN)	-	0.0456506	0.39348
CC	GO:0099012	neuronal dense core vesicle membrane	0	1	1	2	-	ENSBGRG00000018731(STXBP5)	0.0456506	0.39348
CC	GO:0098644	complex of collagen trimers	1	1	2	15	ENSBGRG00000005255(COL5A1)	ENSBGRG00000009561(COL11A1)	0.045774	0.39348
CC	GO:0098588	bounding membrane of organelle	17	5	22	650	ENSBGRG00000006836(CHPF2),ENSBGRG00000008534(PEF1),ENSBGRG00000010057(PEX16),ENSBGRG00000010740(SLC35F6),ENSBGRG00000011517(EVC),ENSBGRG00000012759(MGAT1),ENSBGRG00000012924(STX3),ENSBGRG00000013522(LGR5),ENSBGRG00000019378(CHPF),ENSBGRG00000021046(SNX18),ENSBGRG00000022237(SLC26A11),ENSBGRG00000024660(TMEM115),ENSBGRG00000025151(MARCHF2),ENSBGRG00000025283(SCAMP2),ENSBGRG00000026390(CABP1),ENSBG…	ENSBGRG00000001555(GNAI3),ENSBGRG00000001644(SNX10),ENSBGRG00000003715(RAB8B),ENSBGRG00000018731(STXBP5),ENSBGRG00000021575(CLN5)	0.046685	0.393739
MF	GO:1904121	phosphatidylethanolamine transfer activity	1	1	2	2	ENSBGRG00000019666(PLTP)	ENSBGRG00000002196(MTTP)	0.000468761	0.147321
MF	GO:0044325	ion channel binding	7	0	7	72	ENSBGRG00000006075(SNTA1),ENSBGRG00000009694(KCNJ11),ENSBGRG00000009791(ABCC8),ENSBGRG00000010363(GRINA),ENSBGRG00000012223(KCNC1),ENSBGRG00000022985(SCN4B),ENSBGRG00000025509(KCNB1)	-	0.000928438	0.147321
MF	GO:0030215	semaphorin receptor binding	3	1	4	21	ENSBGRG00000001095(SH3BP1),ENSBGRG00000001699(SEMA6C),ENSBGRG00000026803(SEMA4C)	ENSBGRG00000022242(SEMA3A)	0.000969373	0.147321
MF	GO:0004784	superoxide dismutase activity	2	0	2	3	ENSBGRG00000014092(SOD3),ENSBGRG00000026571	-	0.00138608	0.147321
MF	GO:0016721	oxidoreductase activity, acting on superoxide radicals as acceptor	2	0	2	3	ENSBGRG00000014092(SOD3),ENSBGRG00000026571	-	0.00138608	0.147321
MF	GO:0120016	sphingolipid transfer activity	1	1	2	3	ENSBGRG00000019666(PLTP)	ENSBGRG00000002196(MTTP)	0.00138608	0.147321
MF	GO:0120017	ceramide transfer activity	1	1	2	3	ENSBGRG00000019666(PLTP)	ENSBGRG00000002196(MTTP)	0.00138608	0.147321
MF	GO:0120019	phosphatidylcholine transfer activity	1	1	2	4	ENSBGRG00000019666(PLTP)	ENSBGRG00000002196(MTTP)	0.00273242	0.247443
MF	GO:0005518	collagen binding	4	1	5	47	ENSBGRG00000000863(COL6A2),ENSBGRG00000003011(PODN),ENSBGRG00000019277(NID1),ENSBGRG00000019832(C1QTNF1)	ENSBGRG00000000772(COMP)	0.00337779	0.247443
MF	GO:0043237	laminin-1 binding	1	1	2	5	ENSBGRG00000019277(NID1)	ENSBGRG00000007052(NTN4)	0.00448885	0.247443
MF	GO:0005201	extracellular matrix structural constituent	3	1	4	32	ENSBGRG00000005255(COL5A1),ENSBGRG00000012069(EMILIN1),ENSBGRG00000013383(ELN)	ENSBGRG00000009561(COL11A1)	0.00483071	0.247443
MF	GO:0050840	extracellular matrix binding	3	1	4	32	ENSBGRG00000002127(OLFML2B),ENSBGRG00000013383(ELN),ENSBGRG00000019277(NID1)	ENSBGRG00000007052(NTN4)	0.00483071	0.247443
MF	GO:0016209	antioxidant activity	4	1	5	55	ENSBGRG00000003388(GPX7),ENSBGRG00000013821(PTGS1),ENSBGRG00000014092(SOD3),ENSBGRG00000026571	ENSBGRG00000006702(GPX3)	0.00665828	0.247443
MF	GO:0005488	binding	171	66	237	10057	ENSBGRG00000000154(RCAN1),ENSBGRG00000000399(CRLF1),ENSBGRG00000000549(ATG101),ENSBGRG00000000863(COL6A2),ENSBGRG00000000934(ADAMTSL4),ENSBGRG00000001042,ENSBGRG00000001095(SH3BP1),ENSBGRG00000001621(AQP3),ENSBGRG00000001699(SEMA6C),ENSBGRG00000001779(TBC1D22A),ENSBGRG00000001780(MCRS1),ENSBGRG00000002127(OLFML2B),ENSBGRG00000002228(IGFBP5),ENSBGRG00000002440(IGFBP6),ENSBGRG00000002480(SOX7),ENSB…	ENSBGRG00000000298(CD4),ENSBGRG00000000308(CD48),ENSBGRG00000000638(USP44),ENSBGRG00000000772(COMP),ENSBGRG00000001061,ENSBGRG00000001376(DNAH7),ENSBGRG00000001555(GNAI3),ENSBGRG00000001610(GABPB2),ENSBGRG00000001644(SNX10),ENSBGRG00000001715(CAMLG),ENSBGRG00000001762(STAT4),ENSBGRG00000002112(GSTM3),ENSBGRG00000002196(MTTP),ENSBGRG00000002405,ENSBGRG00000002470(DNAJB14),ENSBGRG00000002976(UBE2K)…	0.00734102	0.247443
MF	GO:0043169	cation binding	42	11	53	1754	ENSBGRG00000002583(MELK),ENSBGRG00000002743(RARG),ENSBGRG00000006039(XYLT2),ENSBGRG00000006287(TESK1),ENSBGRG00000006582(L3MBTL2),ENSBGRG00000006635,ENSBGRG00000008276(SLC25A25),ENSBGRG00000008534(PEF1),ENSBGRG00000009212(ADPRS),ENSBGRG00000009361(STAB1),ENSBGRG00000009629(BMP1),ENSBGRG00000010797(FKBP10),ENSBGRG00000012471(CXXC5),ENSBGRG00000012759(MGAT1),ENSBGRG00000013000(NOS2),ENSBGRG00000013…	ENSBGRG00000000298(CD4),ENSBGRG00000000638(USP44),ENSBGRG00000000772(COMP),ENSBGRG00000001376(DNAH7),ENSBGRG00000005016(S100A12),ENSBGRG00000016750(TIPARP),ENSBGRG00000019283(AGMAT),ENSBGRG00000020997(GLCE),ENSBGRG00000021648(ENPP1),ENSBGRG00000024244,ENSBGRG00000025588(ADGRE1)	0.00735246	0.247443
MF	GO:0043394	proteoglycan binding	2	1	3	21	ENSBGRG00000005255(COL5A1),ENSBGRG00000019277(NID1)	ENSBGRG00000000772(COMP)	0.0100549	0.247443
MF	GO:0005215	transporter activity	26	6	32	962	ENSBGRG00000001621(AQP3),ENSBGRG00000008364(ORAI1),ENSBGRG00000008663(SLC22A23),ENSBGRG00000009196(SLC35C1),ENSBGRG00000009694(KCNJ11),ENSBGRG00000009791(ABCC8),ENSBGRG00000010476(GRIA3),ENSBGRG00000010579,ENSBGRG00000010740(SLC35F6),ENSBGRG00000011193(KCNA6),ENSBGRG00000012223(KCNC1),ENSBGRG00000012434(SLC7A10),ENSBGRG00000012998(ABCC10),ENSBGRG00000013203,ENSBGRG00000017954(CACNG1),ENSBGRG00000…	ENSBGRG00000002196(MTTP),ENSBGRG00000004152(SLC28A3),ENSBGRG00000011115(SLC25A33),ENSBGRG00000015700(MFSD14B),ENSBGRG00000023218(TRPM3),ENSBGRG00000024796(ABCA10)	0.0103368	0.247443
MF	GO:0004860	protein kinase inhibitor activity	3	1	4	41	ENSBGRG00000007727(CDKN2C),ENSBGRG00000010882(SPRY4),ENSBGRG00000016193(CIT)	ENSBGRG00000020580(CASP3)	0.0116873	0.247443
MF	GO:0046872	metal ion binding	39	11	50	1682	ENSBGRG00000002583(MELK),ENSBGRG00000002743(RARG),ENSBGRG00000006039(XYLT2),ENSBGRG00000006287(TESK1),ENSBGRG00000006582(L3MBTL2),ENSBGRG00000006635,ENSBGRG00000008276(SLC25A25),ENSBGRG00000008534(PEF1),ENSBGRG00000009212(ADPRS),ENSBGRG00000009361(STAB1),ENSBGRG00000009629(BMP1),ENSBGRG00000010797(FKBP10),ENSBGRG00000012471(CXXC5),ENSBGRG00000012759(MGAT1),ENSBGRG00000013210(TRIM7),ENSBGRG0000001…	ENSBGRG00000000298(CD4),ENSBGRG00000000638(USP44),ENSBGRG00000000772(COMP),ENSBGRG00000001376(DNAH7),ENSBGRG00000005016(S100A12),ENSBGRG00000016750(TIPARP),ENSBGRG00000019283(AGMAT),ENSBGRG00000020997(GLCE),ENSBGRG00000021648(ENPP1),ENSBGRG00000024244,ENSBGRG00000025588(ADGRE1)	0.0124178	0.247443
MF	GO:0030291	protein serine/threonine kinase inhibitor activity	2	1	3	23	ENSBGRG00000007727(CDKN2C),ENSBGRG00000016193(CIT)	ENSBGRG00000020580(CASP3)	0.0129694	0.247443
MF	GO:0048029	monosaccharide binding	2	2	4	43	ENSBGRG00000025536(PLOD3),ENSBGRG00000026388(ALDOA)	ENSBGRG00000008883(CLEC4D),ENSBGRG00000021575(CLN5)	0.0137718	0.247443
MF	GO:0030145	manganese ion binding	3	1	4	44	ENSBGRG00000006039(XYLT2),ENSBGRG00000012759(MGAT1),ENSBGRG00000025396(FAM20C)	ENSBGRG00000024244	0.0148968	0.247443
MF	GO:0004861	cyclin-dependent protein serine/threonine kinase inhibitor activity	1	1	2	9	ENSBGRG00000007727(CDKN2C)	ENSBGRG00000020580(CASP3)	0.0152583	0.247443
MF	GO:0005251	delayed rectifier potassium channel activity	2	0	2	9	ENSBGRG00000011193(KCNA6),ENSBGRG00000025509(KCNB1)	-	0.0152583	0.247443
MF	GO:0046624	sphingolipid transporter activity	1	1	2	9	ENSBGRG00000019666(PLTP)	ENSBGRG00000002196(MTTP)	0.0152583	0.247443
MF	GO:0019210	kinase inhibitor activity	3	1	4	45	ENSBGRG00000007727(CDKN2C),ENSBGRG00000010882(SPRY4),ENSBGRG00000016193(CIT)	ENSBGRG00000020580(CASP3)	0.0160783	0.247443
MF	GO:0140359	ABC-type transmembrane transporter activity	3	1	4	49	ENSBGRG00000009791(ABCC8),ENSBGRG00000012998(ABCC10),ENSBGRG00000023632	ENSBGRG00000024796(ABCA10)	0.0213837	0.247443
MF	GO:0003827	alpha-1,3-mannosylglycoprotein 2-beta-N-acetylglucosaminyltransferase activity	1	0	1	1	ENSBGRG00000012759(MGAT1)	-	0.0216861	0.247443
MF	GO:0004103	choline kinase activity	1	0	1	1	ENSBGRG00000005249(CHKB)	-	0.0216861	0.247443
MF	GO:0004113	2',3'-cyclic-nucleotide 3'-phosphodiesterase activity	1	0	1	1	ENSBGRG00000013438(CNP)	-	0.0216861	0.247443
MF	GO:0004314	[acyl-carrier-protein] S-malonyltransferase activity	1	0	1	1	ENSBGRG00000014312(MCAT)	-	0.0216861	0.247443
MF	GO:0004476	mannose-6-phosphate isomerase activity	1	0	1	1	ENSBGRG00000025209(MPI)	-	0.0216861	0.247443
MF	GO:0005457	GDP-fucose transmembrane transporter activity	1	0	1	1	ENSBGRG00000009196(SLC35C1)	-	0.0216861	0.247443
MF	GO:0008310	single-stranded DNA 3'-5' exodeoxyribonuclease activity	0	1	1	1	-	ENSBGRG00000026058	0.0216861	0.247443
MF	GO:0008456	alpha-N-acetylgalactosaminidase activity	1	0	1	1	ENSBGRG00000010420(NAGA)	-	0.0216861	0.247443
MF	GO:0015390	purine-specific nucleoside:sodium symporter activity	0	1	1	1	-	ENSBGRG00000004152(SLC28A3)	0.0216861	0.247443
MF	GO:0016419	S-malonyltransferase activity	1	0	1	1	ENSBGRG00000014312(MCAT)	-	0.0216861	0.247443
MF	GO:0016420	malonyltransferase activity	1	0	1	1	ENSBGRG00000014312(MCAT)	-	0.0216861	0.247443
MF	GO:0030023	extracellular matrix constituent conferring elasticity	1	0	1	1	ENSBGRG00000012069(EMILIN1)	-	0.0216861	0.247443
MF	GO:0032791	lead ion binding	1	0	1	1	ENSBGRG00000019762(PLSCR3)	-	0.0216861	0.247443
MF	GO:0033823	procollagen glucosyltransferase activity	1	0	1	1	ENSBGRG00000025536(PLOD3)	-	0.0216861	0.247443
MF	GO:0035034	histone acetyltransferase regulator activity	1	0	1	1	ENSBGRG00000009080(PYGO2)	-	0.0216861	0.247443
MF	GO:0036080	purine nucleotide-sugar transmembrane transporter activity	1	0	1	1	ENSBGRG00000009196(SLC35C1)	-	0.0216861	0.247443
MF	GO:0042011	interleukin-16 binding	0	1	1	1	-	ENSBGRG00000000298(CD4)	0.0216861	0.247443
MF	GO:0042012	interleukin-16 receptor activity	0	1	1	1	-	ENSBGRG00000000298(CD4)	0.0216861	0.247443
MF	GO:0043136	glycerol-3-phosphatase activity	1	0	1	1	ENSBGRG00000020745(PGP)	-	0.0216861	0.247443
MF	GO:0043890	N-acetylgalactosamine-6-sulfatase activity	1	0	1	1	ENSBGRG00000026887(GALNS)	-	0.0216861	0.247443
MF	GO:0047464	heparosan-N-sulfate-glucuronate 5-epimerase activity	0	1	1	1	-	ENSBGRG00000020997(GLCE)	0.0216861	0.247443
MF	GO:0047975	guanosine phosphorylase activity	0	1	1	1	-	ENSBGRG00000004396(LACC1)	0.0216861	0.247443
MF	GO:0050207	plasmanylethanolamine desaturase activity	1	0	1	1	ENSBGRG00000003997(PEDS1)	-	0.0216861	0.247443
MF	GO:0097493	structural molecule activity conferring elasticity	1	0	1	1	ENSBGRG00000012069(EMILIN1)	-	0.0216861	0.247443
MF	GO:0106177	cyclic-GMP-AMP hydrolase activity	0	1	1	1	-	ENSBGRG00000021648(ENPP1)	0.0216861	0.247443
MF	GO:0140292	ADP-ribosylserine hydrolase activity	1	0	1	1	ENSBGRG00000009212(ADPRS)	-	0.0216861	0.247443
MF	GO:0140337	diacylglyceride transfer activity	1	0	1	1	ENSBGRG00000019666(PLTP)	-	0.0216861	0.247443
MF	GO:0140338	sphingomyelin transfer activity	1	0	1	1	ENSBGRG00000019666(PLTP)	-	0.0216861	0.247443
MF	GO:0140339	phosphatidylglycerol transfer activity	1	0	1	1	ENSBGRG00000019666(PLTP)	-	0.0216861	0.247443
MF	GO:0140340	cerebroside transfer activity	1	0	1	1	ENSBGRG00000019666(PLTP)	-	0.0216861	0.247443
MF	GO:0140344	triglyceride transfer activity	0	1	1	1	-	ENSBGRG00000002196(MTTP)	0.0216861	0.247443
MF	GO:1901707	leptomycin B binding	1	0	1	1	ENSBGRG00000004562(ID3)	-	0.0216861	0.247443
MF	GO:1902388	ceramide 1-phosphate transfer activity	0	1	1	1	-	ENSBGRG00000002196(MTTP)	0.0216861	0.247443
MF	GO:1905059	calcium-transporting ATPase activity involved in regulation of postsynaptic cytosolic calcium ion concentration	1	0	1	1	ENSBGRG00000025371(ATP2B2)	-	0.0216861	0.247443
MF	GO:0004601	peroxidase activity	2	1	3	28	ENSBGRG00000003388(GPX7),ENSBGRG00000013821(PTGS1)	ENSBGRG00000006702(GPX3)	0.0221631	0.247443
MF	GO:0019213	deacetylase activity	3	0	3	28	ENSBGRG00000009212(ADPRS),ENSBGRG00000009880(MACROD1),ENSBGRG00000023703(HDAC7)	-	0.0221631	0.247443
MF	GO:0022857	transmembrane transporter activity	23	5	28	866	ENSBGRG00000001621(AQP3),ENSBGRG00000008364(ORAI1),ENSBGRG00000008663(SLC22A23),ENSBGRG00000009196(SLC35C1),ENSBGRG00000009694(KCNJ11),ENSBGRG00000009791(ABCC8),ENSBGRG00000010476(GRIA3),ENSBGRG00000010579,ENSBGRG00000010740(SLC35F6),ENSBGRG00000011193(KCNA6),ENSBGRG00000012223(KCNC1),ENSBGRG00000012434(SLC7A10),ENSBGRG00000012998(ABCC10),ENSBGRG00000017954(CACNG1),ENSBGRG00000018757(SLC37A1),ENS…	ENSBGRG00000004152(SLC28A3),ENSBGRG00000011115(SLC25A33),ENSBGRG00000015700(MFSD14B),ENSBGRG00000023218(TRPM3),ENSBGRG00000024796(ABCA10)	0.0223768	0.247443
MF	GO:0120014	phospholipid transfer activity	1	1	2	11	ENSBGRG00000019666(PLTP)	ENSBGRG00000002196(MTTP)	0.0226553	0.247443
MF	GO:0016763	transferase activity, transferring pentosyl groups	1	3	4	51	ENSBGRG00000006039(XYLT2)	ENSBGRG00000004396(LACC1),ENSBGRG00000007330(PARP9),ENSBGRG00000016750(TIPARP)	0.0243933	0.247443
MF	GO:0005261	cation channel activity	10	1	11	258	ENSBGRG00000008364(ORAI1),ENSBGRG00000009694(KCNJ11),ENSBGRG00000009791(ABCC8),ENSBGRG00000010476(GRIA3),ENSBGRG00000010579,ENSBGRG00000011193(KCNA6),ENSBGRG00000012223(KCNC1),ENSBGRG00000017954(CACNG1),ENSBGRG00000022985(SCN4B),ENSBGRG00000025509(KCNB1)	ENSBGRG00000023218(TRPM3)	0.0253807	0.247443
MF	GO:0043167	ion binding	64	26	90	3449	ENSBGRG00000002583(MELK),ENSBGRG00000002743(RARG),ENSBGRG00000003400(KIF20A),ENSBGRG00000004562(ID3),ENSBGRG00000005237(DUS1L),ENSBGRG00000005255(COL5A1),ENSBGRG00000006039(XYLT2),ENSBGRG00000006287(TESK1),ENSBGRG00000006582(L3MBTL2),ENSBGRG00000006635,ENSBGRG00000007767(NAV3),ENSBGRG00000008276(SLC25A25),ENSBGRG00000008534(PEF1),ENSBGRG00000009212(ADPRS),ENSBGRG00000009361(STAB1),ENSBGRG00000009…	ENSBGRG00000000298(CD4),ENSBGRG00000000638(USP44),ENSBGRG00000000772(COMP),ENSBGRG00000001376(DNAH7),ENSBGRG00000001555(GNAI3),ENSBGRG00000001644(SNX10),ENSBGRG00000002112(GSTM3),ENSBGRG00000003715(RAB8B),ENSBGRG00000005016(S100A12),ENSBGRG00000005276,ENSBGRG00000007032(IYD),ENSBGRG00000007330(PARP9),ENSBGRG00000014185,ENSBGRG00000014796(CDKL5),ENSBGRG00000016563,ENSBGRG00000016750(TIPARP),ENSBGR…	0.0253845	0.247443
MF	GO:0015399	primary active transmembrane transporter activity	5	1	6	105	ENSBGRG00000009791(ABCC8),ENSBGRG00000012998(ABCC10),ENSBGRG00000020907,ENSBGRG00000023632,ENSBGRG00000025371(ATP2B2)	ENSBGRG00000024796(ABCA10)	0.0266856	0.247443
MF	GO:0030246	carbohydrate binding	3	3	6	105	ENSBGRG00000008221(MAN2A2),ENSBGRG00000025536(PLOD3),ENSBGRG00000026388(ALDOA)	ENSBGRG00000008883(CLEC4D),ENSBGRG00000021575(CLN5),ENSBGRG00000021648(ENPP1)	0.0266856	0.247443
MF	GO:0042626	ATPase-coupled transmembrane transporter activity	5	1	6	105	ENSBGRG00000009791(ABCC8),ENSBGRG00000012998(ABCC10),ENSBGRG00000020907,ENSBGRG00000023632,ENSBGRG00000025371(ATP2B2)	ENSBGRG00000024796(ABCA10)	0.0266856	0.247443
MF	GO:0005244	voltage-gated ion channel activity	7	0	7	134	ENSBGRG00000009694(KCNJ11),ENSBGRG00000010579,ENSBGRG00000011193(KCNA6),ENSBGRG00000012223(KCNC1),ENSBGRG00000017954(CACNG1),ENSBGRG00000025509(KCNB1),ENSBGRG00000026391(CLCN7)	-	0.0267877	0.247443
MF	GO:0004993	G protein-coupled serotonin receptor activity	2	0	2	12	ENSBGRG00000018072(HTR4),ENSBGRG00000020868(HTR2A)	-	0.0268022	0.247443
MF	GO:0005537	mannose binding	0	2	2	12	-	ENSBGRG00000008883(CLEC4D),ENSBGRG00000021575(CLN5)	0.0268022	0.247443
MF	GO:0008525	phosphatidylcholine transporter activity	1	1	2	12	ENSBGRG00000019666(PLTP)	ENSBGRG00000002196(MTTP)	0.0268022	0.247443
MF	GO:0099589	serotonin receptor activity	2	0	2	12	ENSBGRG00000018072(HTR4),ENSBGRG00000020868(HTR2A)	-	0.0268022	0.247443
MF	GO:0016757	transferase activity, transferring glycosyl groups	7	3	10	229	ENSBGRG00000006039(XYLT2),ENSBGRG00000006836(CHPF2),ENSBGRG00000007556(ST6GALNAC6),ENSBGRG00000012759(MGAT1),ENSBGRG00000018685(GBGT1),ENSBGRG00000019378(CHPF),ENSBGRG00000025536(PLOD3)	ENSBGRG00000004396(LACC1),ENSBGRG00000007330(PARP9),ENSBGRG00000016750(TIPARP)	0.0279326	0.247443
MF	GO:0022832	voltage-gated channel activity	7	0	7	136	ENSBGRG00000009694(KCNJ11),ENSBGRG00000010579,ENSBGRG00000011193(KCNA6),ENSBGRG00000012223(KCNC1),ENSBGRG00000017954(CACNG1),ENSBGRG00000025509(KCNB1),ENSBGRG00000026391(CLCN7)	-	0.0287348	0.247443
MF	GO:0004364	glutathione transferase activity	0	2	2	13	-	ENSBGRG00000002112(GSTM3),ENSBGRG00000020093	0.0312285	0.247443
MF	GO:0010181	FMN binding	1	1	2	13	ENSBGRG00000013000(NOS2)	ENSBGRG00000007032(IYD)	0.0312285	0.247443
MF	GO:0005267	potassium channel activity	6	0	6	109	ENSBGRG00000009694(KCNJ11),ENSBGRG00000009791(ABCC8),ENSBGRG00000010579,ENSBGRG00000011193(KCNA6),ENSBGRG00000012223(KCNC1),ENSBGRG00000025509(KCNB1)	-	0.0312906	0.247443
MF	GO:0120013	lipid transfer activity	2	1	3	33	ENSBGRG00000013203,ENSBGRG00000019666(PLTP)	ENSBGRG00000002196(MTTP)	0.0341152	0.247443
MF	GO:0005249	voltage-gated potassium channel activity	5	0	5	83	ENSBGRG00000009694(KCNJ11),ENSBGRG00000010579,ENSBGRG00000011193(KCNA6),ENSBGRG00000012223(KCNC1),ENSBGRG00000025509(KCNB1)	-	0.034201	0.247443
MF	GO:0015267	channel activity	13	1	14	377	ENSBGRG00000001621(AQP3),ENSBGRG00000008364(ORAI1),ENSBGRG00000009694(KCNJ11),ENSBGRG00000009791(ABCC8),ENSBGRG00000010476(GRIA3),ENSBGRG00000010579,ENSBGRG00000011193(KCNA6),ENSBGRG00000012223(KCNC1),ENSBGRG00000017954(CACNG1),ENSBGRG00000022985(SCN4B),ENSBGRG00000023632,ENSBGRG00000025509(KCNB1),ENSBGRG00000026391(CLCN7)	ENSBGRG00000023218(TRPM3)	0.035835	0.247443
MF	GO:0022803	passive transmembrane transporter activity	13	1	14	377	ENSBGRG00000001621(AQP3),ENSBGRG00000008364(ORAI1),ENSBGRG00000009694(KCNJ11),ENSBGRG00000009791(ABCC8),ENSBGRG00000010476(GRIA3),ENSBGRG00000010579,ENSBGRG00000011193(KCNA6),ENSBGRG00000012223(KCNC1),ENSBGRG00000017954(CACNG1),ENSBGRG00000022985(SCN4B),ENSBGRG00000023632,ENSBGRG00000025509(KCNB1),ENSBGRG00000026391(CLCN7)	ENSBGRG00000023218(TRPM3)	0.035835	0.247443
MF	GO:0030169	low-density lipoprotein particle binding	2	0	2	14	ENSBGRG00000009361(STAB1),ENSBGRG00000019666(PLTP)	-	0.0359203	0.247443
MF	GO:0140416	DNA-binding transcription factor inhibitor activity	1	1	2	14	ENSBGRG00000004562(ID3)	ENSBGRG00000006944(LEF1)	0.0359203	0.247443
MF	GO:0016684	oxidoreductase activity, acting on peroxide as acceptor	2	1	3	34	ENSBGRG00000003388(GPX7),ENSBGRG00000013821(PTGS1)	ENSBGRG00000006702(GPX3)	0.0368338	0.247443
MF	GO:0005216	ion channel activity	12	1	13	346	ENSBGRG00000008364(ORAI1),ENSBGRG00000009694(KCNJ11),ENSBGRG00000009791(ABCC8),ENSBGRG00000010476(GRIA3),ENSBGRG00000010579,ENSBGRG00000011193(KCNA6),ENSBGRG00000012223(KCNC1),ENSBGRG00000017954(CACNG1),ENSBGRG00000022985(SCN4B),ENSBGRG00000023632,ENSBGRG00000025509(KCNB1),ENSBGRG00000026391(CLCN7)	ENSBGRG00000023218(TRPM3)	0.038983	0.247443
MF	GO:0015932	nucleobase-containing compound transmembrane transporter activity	1	2	3	35	ENSBGRG00000009196(SLC35C1)	ENSBGRG00000004152(SLC28A3),ENSBGRG00000011115(SLC25A33)	0.0396602	0.247443
MF	GO:0022843	voltage-gated cation channel activity	6	0	6	116	ENSBGRG00000009694(KCNJ11),ENSBGRG00000010579,ENSBGRG00000011193(KCNA6),ENSBGRG00000012223(KCNC1),ENSBGRG00000017954(CACNG1),ENSBGRG00000025509(KCNB1)	-	0.0405379	0.247443
MF	GO:0004602	glutathione peroxidase activity	1	1	2	15	ENSBGRG00000003388(GPX7)	ENSBGRG00000006702(GPX3)	0.040864	0.247443
MF	GO:0017080	sodium channel regulator activity	2	0	2	15	ENSBGRG00000006075(SNTA1),ENSBGRG00000022985(SCN4B)	-	0.040864	0.247443
MF	GO:0042974	retinoic acid receptor binding	1	1	2	15	ENSBGRG00000002743(RARG)	ENSBGRG00000003232(LRIF1)	0.040864	0.247443
MF	GO:0043236	laminin binding	1	1	2	15	ENSBGRG00000019277(NID1)	ENSBGRG00000007052(NTN4)	0.040864	0.247443
MF	GO:0070300	phosphatidic acid binding	2	0	2	15	ENSBGRG00000012878(JPH2),ENSBGRG00000019666(PLTP)	-	0.040864	0.247443
MF	GO:0048306	calcium-dependent protein binding	3	0	3	36	ENSBGRG00000008534(PEF1),ENSBGRG00000019762(PLSCR3),ENSBGRG00000026390(CABP1)	-	0.0425933	0.247443
MF	GO:0000832	inositol hexakisphosphate 5-kinase activity	0	1	1	2	-	ENSBGRG00000023483(IP6K2)	0.0429033	0.247443
MF	GO:0004096	catalase activity	1	0	1	2	ENSBGRG00000003388(GPX7)	-	0.0429033	0.247443
MF	GO:0004305	ethanolamine kinase activity	1	0	1	2	ENSBGRG00000005249(CHKB)	-	0.0429033	0.247443
MF	GO:0004649	poly(ADP-ribose) glycohydrolase activity	1	0	1	2	ENSBGRG00000009212(ADPRS)	-	0.0429033	0.247443
MF	GO:0004663	Rab geranylgeranyltransferase activity	1	0	1	2	ENSBGRG00000019282(RABGGTA)	-	0.0429033	0.247443
MF	GO:0004666	prostaglandin-endoperoxide synthase activity	1	0	1	2	ENSBGRG00000013821(PTGS1)	-	0.0429033	0.247443
MF	GO:0005350	pyrimidine nucleobase transmembrane transporter activity	0	1	1	2	-	ENSBGRG00000004152(SLC28A3)	0.0429033	0.247443
MF	GO:0008281	sulfonylurea receptor activity	1	0	1	2	ENSBGRG00000009791(ABCC8)	-	0.0429033	0.247443
MF	GO:0008967	phosphoglycolate phosphatase activity	1	0	1	2	ENSBGRG00000020745(PGP)	-	0.0429033	0.247443
MF	GO:0015218	pyrimidine nucleotide transmembrane transporter activity	0	1	1	2	-	ENSBGRG00000011115(SLC25A33)	0.0429033	0.247443
MF	GO:0015272	ATP-activated inward rectifier potassium channel activity	1	0	1	2	ENSBGRG00000009694(KCNJ11)	-	0.0429033	0.247443
MF	GO:0015389	pyrimidine- and adenine-specific:sodium symporter activity	0	1	1	2	-	ENSBGRG00000004152(SLC28A3)	0.0429033	0.247443
MF	GO:0015391	nucleobase:cation symporter activity	0	1	1	2	-	ENSBGRG00000004152(SLC28A3)	0.0429033	0.247443
MF	GO:0016422	mRNA (2'-O-methyladenosine-N6-)-methyltransferase activity	1	0	1	2	ENSBGRG00000019922(PCIF1)	-	0.0429033	0.247443
MF	GO:0017089	glycolipid transfer activity	1	0	1	2	ENSBGRG00000019666(PLTP)	-	0.0429033	0.247443
MF	GO:0017159	pantetheine hydrolase activity	0	1	1	2	-	ENSBGRG00000019917(VNN2)	0.0429033	0.247443
MF	GO:0030158	protein xylosyltransferase activity	1	0	1	2	ENSBGRG00000006039(XYLT2)	-	0.0429033	0.247443
MF	GO:0034235	GPI anchor binding	1	0	1	2	ENSBGRG00000010913(GPAA1)	-	0.0429033	0.247443
MF	GO:0034617	tetrahydrobiopterin binding	1	0	1	2	ENSBGRG00000013000(NOS2)	-	0.0429033	0.247443
MF	GO:0035403	histone kinase activity (H3-T6 specific)	1	0	1	2	ENSBGRG00000018161(PRKCA)	-	0.0429033	0.247443
MF	GO:0043185	vascular endothelial growth factor receptor 3 binding	1	0	1	2	ENSBGRG00000008928(VEGFC)	-	0.0429033	0.247443
MF	GO:0045340	mercury ion binding	1	0	1	2	ENSBGRG00000019762(PLSCR3)	-	0.0429033	0.247443
MF	GO:0047238	glucuronosyl-N-acetylgalactosaminyl-proteoglycan 4-beta-N-acetylgalactosaminyltransferase activity	1	0	1	2	ENSBGRG00000019378(CHPF)	-	0.0429033	0.247443
MF	GO:0050211	procollagen galactosyltransferase activity	1	0	1	2	ENSBGRG00000025536(PLOD3)	-	0.0429033	0.247443
MF	GO:0050510	N-acetylgalactosaminyl-proteoglycan 3-beta-glucuronosyltransferase activity	1	0	1	2	ENSBGRG00000019378(CHPF)	-	0.0429033	0.247443
MF	GO:0061463	O-acetyl-ADP-ribose deacetylase activity	1	0	1	2	ENSBGRG00000009212(ADPRS)	-	0.0429033	0.247443
MF	GO:0070039	rRNA (guanosine-2'-O-)-methyltransferase activity	1	0	1	2	ENSBGRG00000016775(MRM1)	-	0.0429033	0.247443
MF	GO:0071886	1-(4-iodo-2,5-dimethoxyphenyl)propan-2-amine binding	1	0	1	2	ENSBGRG00000020868(HTR2A)	-	0.0429033	0.247443
MF	GO:0072570	ADP-D-ribose binding	0	1	1	2	-	ENSBGRG00000007330(PARP9)	0.0429033	0.247443
MF	GO:0097243	flavonoid binding	0	1	1	2	-	ENSBGRG00000023483(IP6K2)	0.0429033	0.247443
MF	GO:0098640	integrin binding involved in cell-matrix adhesion	1	0	1	2	ENSBGRG00000012069(EMILIN1)	-	0.0429033	0.247443
MF	GO:1904713	beta-catenin destruction complex binding	1	0	1	2	ENSBGRG00000009986(AMER1)	-	0.0429033	0.247443
MF	GO:0005158	insulin receptor binding	1	1	2	16	ENSBGRG00000013185(IRS1)	ENSBGRG00000021648(ENPP1)	0.0460466	0.257584
MF	GO:0005520	insulin-like growth factor binding	2	0	2	16	ENSBGRG00000002228(IGFBP5),ENSBGRG00000002440(IGFBP6)	-	0.0460466	0.257584
MF	GO:0008569	ATP-dependent microtubule motor activity, minus-end-directed	0	2	2	16	-	ENSBGRG00000001376(DNAH7),ENSBGRG00000018062(DNAH5)	0.0460466	0.257584
MF	GO:0071889	14-3-3 protein binding	2	0	2	16	ENSBGRG00000001779(TBC1D22A),ENSBGRG00000023703(HDAC7)	-	0.0460466	0.257584

## Sheet: LP vs HP
GO analysis for differential expression mRNAs between LP vs HP												KEGG pathway analysis for differential expression mRNAs between LP vs HP
Category	GO.ID	Term	Up	Down	DEG	Total	Up_Gene	Down_Gene	P_value	FDR		PathwayID	Pathway	Level1	Level2	Up_number	Down_number	DEG_number	total_number	Pvalue	FDR	Up_gene	Down_gene	URL
BP	GO:0006734	NADH metabolic process	5	0	5	15	ENSBGRG00000002916(GPD1),ENSBGRG00000012014(ENO1),ENSBGRG00000013574(PKM),ENSBGRG00000014778(PGK1),ENSBGRG00000021836(TPI1)	-	3.82324e-06	0.00571805		ko00010	Glycolysis / Gluconeogenesis	Metabolism	Carbohydrate metabolism	7	0	7	58	3.27765e-05	0.00691583	ENSBGRG00000012014(ENO1),ENSBGRG00000022167(GPI),ENSBGRG00000026145(ALDH2),ENSBGRG00000013574(PKM),ENSBGRG00000006288(FBP2),ENSBGRG00000021836(TPI1),ENSBGRG00000014778(PGK1)	-	http://www.kegg.jp/kegg-bin/show_pathway?map=map00010&multi_query=K00873+%23FFFFFF,red%0d%0aK01689+%23FFFFFF,red%0d%0aK01803+%23FFFFFF,red%0d%0aK03841+%23FFFFFF,red%0d%0aK00927+%23FFFFFF,red%0d%0aK01810+%23FFFFFF,red%0d%0aK00128+%23FFFFFF,red%0d%0a
BP	GO:0019674	NAD metabolic process	5	0	5	15	ENSBGRG00000002916(GPD1),ENSBGRG00000012014(ENO1),ENSBGRG00000013574(PKM),ENSBGRG00000014778(PGK1),ENSBGRG00000021836(TPI1)	-	3.82324e-06	0.00571805		ko00280	Valine, leucine and isoleucine degradation	Metabolism	Amino acid metabolism	5	0	5	49	0.00101318	0.106891	ENSBGRG00000026412(ACADS),ENSBGRG00000014917(ACAD8),ENSBGRG00000026145(ALDH2),ENSBGRG00000026875(ACSF3),ENSBGRG00000019059(BCKDHA)	-	http://www.kegg.jp/kegg-bin/show_pathway?map=map00280&multi_query=K00166+%23FFFFFF,red%0d%0aK11538+%23FFFFFF,red%0d%0aK00128+%23FFFFFF,red%0d%0aK00248+%23FFFFFF,red%0d%0aK18660+%23FFFFFF,red%0d%0a
BP	GO:0006006	glucose metabolic process	8	3	11	118	ENSBGRG00000002916(GPD1),ENSBGRG00000012014(ENO1),ENSBGRG00000012849(SLC45A3),ENSBGRG00000013574(PKM),ENSBGRG00000014778(PGK1),ENSBGRG00000021836(TPI1),ENSBGRG00000022167(GPI),ENSBGRG00000022933(BRAT1)	ENSBGRG00000012579(FOXO1),ENSBGRG00000014262(PPARGC1A),ENSBGRG00000021648(ENPP1)	6.03347e-06	0.00571805		ko00534	Glycosaminoglycan biosynthesis - heparan sulfate / heparin	Metabolism	Glycan biosynthesis and metabolism	2	1	3	21	0.00421699	0.296595	ENSBGRG00000008937(EXTL1),ENSBGRG00000006039(XYLT2)	ENSBGRG00000020997(GLCE)	http://www.kegg.jp/kegg-bin/show_pathway?map=map00534&multi_query=K01793+%23FFFFFF,green%0d%0aK00771+%23FFFFFF,red%0d%0aK02368+%23FFFFFF,red%0d%0a
BP	GO:0006735	NADH regeneration	4	0	4	9	ENSBGRG00000012014(ENO1),ENSBGRG00000013574(PKM),ENSBGRG00000014778(PGK1),ENSBGRG00000021836(TPI1)	-	1.01745e-05	0.00571805		ko00330	Arginine and proline metabolism	Metabolism	Amino acid metabolism	3	1	4	48	0.00686992	0.362388	ENSBGRG00000003404(ALDH4A1),ENSBGRG00000015533(GAMT),ENSBGRG00000026145(ALDH2)	ENSBGRG00000010694(AMD1)	http://www.kegg.jp/kegg-bin/show_pathway?map=map00330&multi_query=K00294+%23FFFFFF,red%0d%0aK01611+%23FFFFFF,green%0d%0aK00128+%23FFFFFF,red%0d%0aK00542+%23FFFFFF,red%0d%0a
BP	GO:0061621	canonical glycolysis	4	0	4	9	ENSBGRG00000012014(ENO1),ENSBGRG00000013574(PKM),ENSBGRG00000014778(PGK1),ENSBGRG00000021836(TPI1)	-	1.01745e-05	0.00571805		ko05146	Amoebiasis	Human Diseases	Infectious disease: parasitic	4	1	5	87	0.0121969	0.51471	ENSBGRG00000018040(CD14),ENSBGRG00000021195(LAMA5),ENSBGRG00000004437(COL4A1),ENSBGRG00000005083(COL4A2)	ENSBGRG00000017549(TLR2)	http://www.kegg.jp/kegg-bin/show_pathway?map=map05146&multi_query=K10159+%23FFFFFF,green%0d%0aK06237+%23FFFFFF,red%0d%0aK04391+%23FFFFFF,red%0d%0aK06240+%23FFFFFF,red%0d%0a
BP	GO:0061718	glucose catabolic process to pyruvate	4	0	4	9	ENSBGRG00000012014(ENO1),ENSBGRG00000013574(PKM),ENSBGRG00000014778(PGK1),ENSBGRG00000021836(TPI1)	-	1.01745e-05	0.00571805		ko00760	Nicotinate and nicotinamide metabolism	Metabolism	Metabolism of cofactors and vitamins	1	2	3	33	0.0150719	0.53003	ENSBGRG00000019172(NMRK2)	ENSBGRG00000021648(ENPP1),ENSBGRG00000007410(NAMPT)	http://www.kegg.jp/kegg-bin/show_pathway?map=map00760&multi_query=K01513+%23FFFFFF,green%0d%0aK03462+%23FFFFFF,green%0d%0aK10524+%23FFFFFF,red%0d%0a
BP	GO:0061620	glycolytic process through glucose-6-phosphate	4	0	4	10	ENSBGRG00000012014(ENO1),ENSBGRG00000013574(PKM),ENSBGRG00000014778(PGK1),ENSBGRG00000021836(TPI1)	-	1.67279e-05	0.00805806		ko00562	Inositol phosphate metabolism	Metabolism	Carbohydrate metabolism	2	2	4	67	0.0215209	0.547865	ENSBGRG00000009666(PIK3C2B),ENSBGRG00000021836(TPI1)	ENSBGRG00000007957(PLCH1),ENSBGRG00000009254(PIK3C2A)	http://www.kegg.jp/kegg-bin/show_pathway?map=map00562&multi_query=K00923+%23FFFFFF,purple%0d%0aK01803+%23FFFFFF,red%0d%0aK19006+%23FFFFFF,green%0d%0a
BP	GO:0006007	glucose catabolic process	4	0	4	11	ENSBGRG00000012014(ENO1),ENSBGRG00000013574(PKM),ENSBGRG00000014778(PGK1),ENSBGRG00000021836(TPI1)	-	2.5931e-05	0.0109299		ko05132	Salmonella infection	Human Diseases	Infectious disease: bacterial	4	4	8	221	0.0240668	0.547865	ENSBGRG00000009096(FOS),ENSBGRG00000009666(PIK3C2B),ENSBGRG00000017840(ARF6),ENSBGRG00000018040(CD14)	ENSBGRG00000007270(NLRC4),ENSBGRG00000009254(PIK3C2A),ENSBGRG00000017549(TLR2),ENSBGRG00000014062(ABI1)	http://www.kegg.jp/kegg-bin/show_pathway?map=map05132&multi_query=K12805+%23FFFFFF,green%0d%0aK10159+%23FFFFFF,green%0d%0aK23649+%23FFFFFF,green%0d%0aK00923+%23FFFFFF,purple%0d%0aK04391+%23FFFFFF,red%0d%0aK04379+%23FFFFFF,red%0d%0aK07941+%23FFFFFF,red%0d%0a
BP	GO:0061615	glycolytic process through fructose-6-phosphate	4	0	4	12	ENSBGRG00000012014(ENO1),ENSBGRG00000013574(PKM),ENSBGRG00000014778(PGK1),ENSBGRG00000021836(TPI1)	-	3.83705e-05	0.0134247		ko04514	Cell adhesion molecules	Environmental Information Processing	Signaling molecules and interaction	3	3	6	142	0.0252142	0.547865	ENSBGRG00000019591(NLGN2),ENSBGRG00000020812,ENSBGRG00000019125	ENSBGRG00000002717,ENSBGRG00000012778(CDH1),ENSBGRG00000012363(SDC4)	http://www.kegg.jp/kegg-bin/show_pathway?map=map04514&multi_query=K05689+%23FFFFFF,green%0d%0aK06751+%23FFFFFF,red%0d%0aK06793+%23FFFFFF,green%0d%0aK06752+%23FFFFFF,red%0d%0aK07378+%23FFFFFF,red%0d%0aK16338+%23FFFFFF,green%0d%0a
BP	GO:0019318	hexose metabolic process	8	3	11	144	ENSBGRG00000002916(GPD1),ENSBGRG00000012014(ENO1),ENSBGRG00000012849(SLC45A3),ENSBGRG00000013574(PKM),ENSBGRG00000014778(PGK1),ENSBGRG00000021836(TPI1),ENSBGRG00000022167(GPI),ENSBGRG00000022933(BRAT1)	ENSBGRG00000012579(FOXO1),ENSBGRG00000014262(PPARGC1A),ENSBGRG00000021648(ENPP1)	3.98123e-05	0.0134247		ko00532	Glycosaminoglycan biosynthesis - chondroitin sulfate / dermatan sulfate	Metabolism	Glycan biosynthesis and metabolism	2	0	2	16	0.0259652	0.547865	ENSBGRG00000006836(CHPF2),ENSBGRG00000006039(XYLT2)	-	http://www.kegg.jp/kegg-bin/show_pathway?map=map00532&multi_query=K03419+%23FFFFFF,red%0d%0aK00771+%23FFFFFF,red%0d%0a
BP	GO:0019320	hexose catabolic process	4	0	4	15	ENSBGRG00000012014(ENO1),ENSBGRG00000013574(PKM),ENSBGRG00000014778(PGK1),ENSBGRG00000021836(TPI1)	-	0.000101579	0.0291547		ko03018	RNA degradation	Genetic Information Processing	Folding, sorting and degradation	3	1	4	74	0.0297089	0.569871	ENSBGRG00000026320(BTG2),ENSBGRG00000014538(PABPC1L),ENSBGRG00000012014(ENO1)	ENSBGRG00000002139	http://www.kegg.jp/kegg-bin/show_pathway?map=map03018&multi_query=K01689+%23FFFFFF,red%0d%0aK14443+%23FFFFFF,purple%0d%0aK13126+%23FFFFFF,red%0d%0a
BP	GO:0005996	monosaccharide metabolic process	8	3	11	160	ENSBGRG00000002916(GPD1),ENSBGRG00000012014(ENO1),ENSBGRG00000012849(SLC45A3),ENSBGRG00000013574(PKM),ENSBGRG00000014778(PGK1),ENSBGRG00000021836(TPI1),ENSBGRG00000022167(GPI),ENSBGRG00000022933(BRAT1)	ENSBGRG00000012579(FOXO1),ENSBGRG00000014262(PPARGC1A),ENSBGRG00000021648(ENPP1)	0.000103754	0.0291547		ko04512	ECM-receptor interaction	Environmental Information Processing	Signaling molecules and interaction	3	1	4	80	0.0380144	0.640431	ENSBGRG00000005083(COL4A2),ENSBGRG00000004437(COL4A1),ENSBGRG00000021195(LAMA5)	ENSBGRG00000012363(SDC4)	http://www.kegg.jp/kegg-bin/show_pathway?map=map04512&multi_query=K06240+%23FFFFFF,red%0d%0aK16338+%23FFFFFF,green%0d%0aK06237+%23FFFFFF,red%0d%0a
BP	GO:0006094	gluconeogenesis	4	2	6	49	ENSBGRG00000002916(GPD1),ENSBGRG00000014778(PGK1),ENSBGRG00000021836(TPI1),ENSBGRG00000022167(GPI)	ENSBGRG00000012579(FOXO1),ENSBGRG00000014262(PPARGC1A)	0.00018618	0.0482923		ko00770	Pantothenate and CoA biosynthesis	Metabolism	Metabolism of cofactors and vitamins	1	1	2	20	0.0394578	0.640431	ENSBGRG00000026145(ALDH2)	ENSBGRG00000021648(ENPP1)	http://www.kegg.jp/kegg-bin/show_pathway?map=map00770&multi_query=K01513+%23FFFFFF,green%0d%0aK00128+%23FFFFFF,red%0d%0a
BP	GO:0046365	monosaccharide catabolic process	4	0	4	18	ENSBGRG00000012014(ENO1),ENSBGRG00000013574(PKM),ENSBGRG00000014778(PGK1),ENSBGRG00000021836(TPI1)	-	0.000218626	0.0523763		ko05134	Legionellosis	Human Diseases	Infectious disease: bacterial	1	2	3	50	0.0446373	0.645002	ENSBGRG00000018040(CD14)	ENSBGRG00000017549(TLR2),ENSBGRG00000007270(NLRC4)	http://www.kegg.jp/kegg-bin/show_pathway?map=map05134&multi_query=K12805+%23FFFFFF,green%0d%0aK10159+%23FFFFFF,green%0d%0aK04391+%23FFFFFF,red%0d%0a
BP	GO:0019319	hexose biosynthetic process	4	2	6	51	ENSBGRG00000002916(GPD1),ENSBGRG00000014778(PGK1),ENSBGRG00000021836(TPI1),ENSBGRG00000022167(GPI)	ENSBGRG00000012579(FOXO1),ENSBGRG00000014262(PPARGC1A)	0.000232991	0.0523763		ko00981	Insect hormone biosynthesis	Metabolism	Metabolism of terpenoids and polyketides	1	0	1	3	0.0469114	0.645002	ENSBGRG00000026145(ALDH2)	-	http://www.kegg.jp/kegg-bin/show_pathway?map=map00981&multi_query=K00128+%23FFFFFF,red%0d%0a
BP	GO:0046364	monosaccharide biosynthetic process	4	2	6	55	ENSBGRG00000002916(GPD1),ENSBGRG00000014778(PGK1),ENSBGRG00000021836(TPI1),ENSBGRG00000022167(GPI)	ENSBGRG00000012579(FOXO1),ENSBGRG00000014262(PPARGC1A)	0.000354131	0.0746331		ko04922	Glucagon signaling pathway	Organismal Systems	Endocrine system	2	2	4	87	0.0492284	0.645002	ENSBGRG00000006288(FBP2),ENSBGRG00000013574(PKM)	ENSBGRG00000012579(FOXO1),ENSBGRG00000014262(PPARGC1A)	http://www.kegg.jp/kegg-bin/show_pathway?map=map04922&multi_query=K07202+%23FFFFFF,green%0d%0aK07201+%23FFFFFF,green%0d%0aK00873+%23FFFFFF,red%0d%0aK03841+%23FFFFFF,red%0d%0a
BP	GO:0006165	nucleoside diphosphate phosphorylation	7	0	7	78	ENSBGRG00000002916(GPD1),ENSBGRG00000012014(ENO1),ENSBGRG00000013574(PKM),ENSBGRG00000014778(PGK1),ENSBGRG00000021836(TPI1),ENSBGRG00000022167(GPI),ENSBGRG00000026159(NME3)	-	0.000388684	0.0770966		ko04933	AGE-RAGE signaling pathway in diabetic complications	Human Diseases	Endocrine and metabolic disease	2	2	4	90	0.0545365	0.645002	ENSBGRG00000004437(COL4A1),ENSBGRG00000005083(COL4A2)	ENSBGRG00000012579(FOXO1),ENSBGRG00000020251	http://www.kegg.jp/kegg-bin/show_pathway?map=map04933&multi_query=K14624+%23FFFFFF,green%0d%0aK06237+%23FFFFFF,red%0d%0aK07201+%23FFFFFF,green%0d%0a
BP	GO:0046939	nucleotide phosphorylation	7	0	7	80	ENSBGRG00000002916(GPD1),ENSBGRG00000012014(ENO1),ENSBGRG00000013574(PKM),ENSBGRG00000014778(PGK1),ENSBGRG00000021836(TPI1),ENSBGRG00000022167(GPI),ENSBGRG00000026159(NME3)	-	0.00045396	0.0850418		ko00030	Pentose phosphate pathway	Metabolism	Carbohydrate metabolism	2	0	2	24	0.0550239	0.645002	ENSBGRG00000006288(FBP2),ENSBGRG00000022167(GPI)	-	http://www.kegg.jp/kegg-bin/show_pathway?map=map00030&multi_query=K03841+%23FFFFFF,red%0d%0aK01810+%23FFFFFF,red%0d%0a
BP	GO:0006096	glycolytic process	6	0	6	63	ENSBGRG00000002916(GPD1),ENSBGRG00000012014(ENO1),ENSBGRG00000013574(PKM),ENSBGRG00000014778(PGK1),ENSBGRG00000021836(TPI1),ENSBGRG00000022167(GPI)	-	0.000740174	0.123565		ko05135	Yersinia infection	Human Diseases	Infectious disease: bacterial	3	2	5	132	0.0586056	0.65083	ENSBGRG00000017840(ARF6),ENSBGRG00000026252(PXN),ENSBGRG00000009096(FOS)	ENSBGRG00000007270(NLRC4),ENSBGRG00000020251	http://www.kegg.jp/kegg-bin/show_pathway?map=map05135&multi_query=K14624+%23FFFFFF,green%0d%0aK12805+%23FFFFFF,green%0d%0aK04379+%23FFFFFF,red%0d%0aK05760+%23FFFFFF,red%0d%0aK07941+%23FFFFFF,red%0d%0a
BP	GO:0009991	response to extracellular stimulus	8	4	12	234	ENSBGRG00000001080(ELAPOR1),ENSBGRG00000008094(KLF10),ENSBGRG00000008276(SLC25A25),ENSBGRG00000009096(FOS),ENSBGRG00000009666(PIK3C2B),ENSBGRG00000011484(SFRP1),ENSBGRG00000013936(MYBBP1A),ENSBGRG00000020110(AXL)	ENSBGRG00000009051(ACVR1C),ENSBGRG00000012579(FOXO1),ENSBGRG00000014262(PPARGC1A),ENSBGRG00000021648(ENPP1)	0.000764835	0.123565		ko05323	Rheumatoid arthritis	Human Diseases	Immune disease	2	2	4	96	0.066046	0.680745	ENSBGRG00000009096(FOS),ENSBGRG00000019125	ENSBGRG00000020251,ENSBGRG00000017549(TLR2)	http://www.kegg.jp/kegg-bin/show_pathway?map=map05323&multi_query=K10159+%23FFFFFF,green%0d%0aK14624+%23FFFFFF,green%0d%0aK04379+%23FFFFFF,red%0d%0aK06752+%23FFFFFF,red%0d%0a
BP	GO:0006757	ATP generation from ADP	6	0	6	64	ENSBGRG00000002916(GPD1),ENSBGRG00000012014(ENO1),ENSBGRG00000013574(PKM),ENSBGRG00000014778(PGK1),ENSBGRG00000021836(TPI1),ENSBGRG00000022167(GPI)	-	0.000805149	0.123565		ko00500	Starch and sucrose metabolism	Metabolism	Carbohydrate metabolism	1	1	2	28	0.0723586	0.680745	ENSBGRG00000022167(GPI)	ENSBGRG00000021648(ENPP1)	http://www.kegg.jp/kegg-bin/show_pathway?map=map00500&multi_query=K01513+%23FFFFFF,green%0d%0aK01810+%23FFFFFF,red%0d%0a
BP	GO:0071725	response to triacyl bacterial lipopeptide	1	1	2	3	ENSBGRG00000018040(CD14)	ENSBGRG00000017549(TLR2)	0.000879465	0.123565		ko04974	Protein digestion and absorption	Organismal Systems	Digestive system	4	0	4	100	0.0743692	0.680745	ENSBGRG00000020183(COL15A1),ENSBGRG00000004437(COL4A1),ENSBGRG00000005083(COL4A2),ENSBGRG00000022005(MEP1B)	-	http://www.kegg.jp/kegg-bin/show_pathway?map=map04974&multi_query=K08135+%23FFFFFF,red%0d%0aK06237+%23FFFFFF,red%0d%0aK08606+%23FFFFFF,red%0d%0a
BP	GO:0071726	cellular response to diacyl bacterial lipopeptide	1	1	2	3	ENSBGRG00000018040(CD14)	ENSBGRG00000017549(TLR2)	0.000879465	0.123565		ko00051	Fructose and mannose metabolism	Metabolism	Carbohydrate metabolism	2	0	2	30	0.0816021	0.680745	ENSBGRG00000006288(FBP2),ENSBGRG00000021836(TPI1)	-	http://www.kegg.jp/kegg-bin/show_pathway?map=map00051&multi_query=K01803+%23FFFFFF,red%0d%0aK03841+%23FFFFFF,red%0d%0a
BP	GO:0071727	cellular response to triacyl bacterial lipopeptide	1	1	2	3	ENSBGRG00000018040(CD14)	ENSBGRG00000017549(TLR2)	0.000879465	0.123565		ko00640	Propanoate metabolism	Metabolism	Carbohydrate metabolism	2	0	2	30	0.0816021	0.680745	ENSBGRG00000026412(ACADS),ENSBGRG00000019059(BCKDHA)	-	http://www.kegg.jp/kegg-bin/show_pathway?map=map00640&multi_query=K00166+%23FFFFFF,red%0d%0aK00248+%23FFFFFF,red%0d%0a
BP	GO:0086010	membrane depolarization during action potential	2	1	3	12	ENSBGRG00000004337(KCNH2),ENSBGRG00000022985(SCN4B)	ENSBGRG00000012965(SCN3B)	0.000994661	0.133159		ko00410	beta-Alanine metabolism	Metabolism	Metabolism of other amino acids	2	0	2	30	0.0816021	0.680745	ENSBGRG00000026412(ACADS),ENSBGRG00000026145(ALDH2)	-	http://www.kegg.jp/kegg-bin/show_pathway?map=map00410&multi_query=K00128+%23FFFFFF,red%0d%0aK00248+%23FFFFFF,red%0d%0a
BP	GO:0046031	ADP metabolic process	6	0	6	67	ENSBGRG00000002916(GPD1),ENSBGRG00000012014(ENO1),ENSBGRG00000013574(PKM),ENSBGRG00000014778(PGK1),ENSBGRG00000021836(TPI1),ENSBGRG00000022167(GPI)	-	0.00102673	0.133159		ko05145	Toxoplasmosis	Human Diseases	Infectious disease: parasitic	3	1	4	105	0.0854849	0.680745	ENSBGRG00000021195(LAMA5),ENSBGRG00000023432(IL10RA),ENSBGRG00000019125	ENSBGRG00000017549(TLR2)	http://www.kegg.jp/kegg-bin/show_pathway?map=map05145&multi_query=K06752+%23FFFFFF,red%0d%0aK06240+%23FFFFFF,red%0d%0aK10159+%23FFFFFF,green%0d%0aK05134+%23FFFFFF,red%0d%0a
BP	GO:0014823	response to activity	2	1	3	13	ENSBGRG00000007772(METRNL),ENSBGRG00000008276(SLC25A25)	ENSBGRG00000014262(PPARGC1A)	0.00127666	0.149321		ko05140	Leishmaniasis	Human Diseases	Infectious disease: parasitic	2	1	3	66	0.0871096	0.680745	ENSBGRG00000009096(FOS),ENSBGRG00000019125	ENSBGRG00000017549(TLR2)	http://www.kegg.jp/kegg-bin/show_pathway?map=map05140&multi_query=K10159+%23FFFFFF,green%0d%0aK04379+%23FFFFFF,red%0d%0aK06752+%23FFFFFF,red%0d%0a
BP	GO:0009132	nucleoside diphosphate metabolic process	7	0	7	96	ENSBGRG00000002916(GPD1),ENSBGRG00000012014(ENO1),ENSBGRG00000013574(PKM),ENSBGRG00000014778(PGK1),ENSBGRG00000021836(TPI1),ENSBGRG00000022167(GPI),ENSBGRG00000026159(NME3)	-	0.00135011	0.149321		ko04122	Sulfur relay system	Genetic Information Processing	Folding, sorting and degradation	1	0	1	7	0.106082	0.799406	ENSBGRG00000005144(MOCS3)	-	http://www.kegg.jp/kegg-bin/show_pathway?map=map04122&multi_query=K11996+%23FFFFFF,red%0d%0a
BP	GO:0048646	anatomical structure formation involved in morphogenesis	22	3	25	756	ENSBGRG00000000313(CCN1),ENSBGRG00000000523(NR4A1),ENSBGRG00000002480(SOX7),ENSBGRG00000004437(COL4A1),ENSBGRG00000005083(COL4A2),ENSBGRG00000011484(SFRP1),ENSBGRG00000013574(PKM),ENSBGRG00000014023(ADA),ENSBGRG00000014778(PGK1),ENSBGRG00000015317(MCAM),ENSBGRG00000017135(PLEKHO1),ENSBGRG00000017288(ADGRG1),ENSBGRG00000017664(PRKD2),ENSBGRG00000017761(PXDN),ENSBGRG00000021840(OSR1),ENSBGRG0000002…	ENSBGRG00000004102(STK3),ENSBGRG00000012363(SDC4),ENSBGRG00000014062(ABI1)	0.00136409	0.149321		ko03008	Ribosome biogenesis in eukaryotes	Genetic Information Processing	Translation	2	1	3	76	0.119789	0.846087	ENSBGRG00000022016(TCOF1),ENSBGRG00000012277(RRP7A)	ENSBGRG00000003528(WDR75)	http://www.kegg.jp/kegg-bin/show_pathway?map=map03008&multi_query=K14552+%23FFFFFF,green%0d%0aK14562+%23FFFFFF,red%0d%0aK14545+%23FFFFFF,red%0d%0a
BP	GO:0009135	purine nucleoside diphosphate metabolic process	6	0	6	71	ENSBGRG00000002916(GPD1),ENSBGRG00000012014(ENO1),ENSBGRG00000013574(PKM),ENSBGRG00000014778(PGK1),ENSBGRG00000021836(TPI1),ENSBGRG00000022167(GPI)	-	0.0013917	0.149321		ko00740	Riboflavin metabolism	Metabolism	Metabolism of cofactors and vitamins	0	1	1	8	0.120297	0.846087	-	ENSBGRG00000021648(ENPP1)	http://www.kegg.jp/kegg-bin/show_pathway?map=map00740&multi_query=K01513+%23FFFFFF,green%0d%0a
BP	GO:0009179	purine ribonucleoside diphosphate metabolic process	6	0	6	71	ENSBGRG00000002916(GPD1),ENSBGRG00000012014(ENO1),ENSBGRG00000013574(PKM),ENSBGRG00000014778(PGK1),ENSBGRG00000021836(TPI1),ENSBGRG00000022167(GPI)	-	0.0013917	0.149321		ko04060	Cytokine-cytokine receptor interaction	Environmental Information Processing	Signaling molecules and interaction	4	3	7	265	0.128152	0.85932	ENSBGRG00000007226,ENSBGRG00000007264(TNFSF4),ENSBGRG00000024149,ENSBGRG00000023432(IL10RA)	ENSBGRG00000020251,ENSBGRG00000000718,ENSBGRG00000009051(ACVR1C)	http://www.kegg.jp/kegg-bin/show_pathway?map=map04060&multi_query=K22632+%23FFFFFF,red%0d%0aK13568+%23FFFFFF,green%0d%0aK14624+%23FFFFFF,green%0d%0aK05469+%23FFFFFF,red%0d%0aK04723+%23FFFFFF,green%0d%0aK05134+%23FFFFFF,red%0d%0aK04737+%23FFFFFF,red%0d%0a
BP	GO:0016051	carbohydrate biosynthetic process	4	4	8	125	ENSBGRG00000002916(GPD1),ENSBGRG00000014778(PGK1),ENSBGRG00000021836(TPI1),ENSBGRG00000022167(GPI)	ENSBGRG00000011219(LHCGR),ENSBGRG00000012579(FOXO1),ENSBGRG00000014262(PPARGC1A),ENSBGRG00000021648(ENPP1)	0.00145163	0.149321		ko00071	Fatty acid degradation	Metabolism	Lipid metabolism	2	0	2	41	0.137761	0.85932	ENSBGRG00000026145(ALDH2),ENSBGRG00000026412(ACADS)	-	http://www.kegg.jp/kegg-bin/show_pathway?map=map00071&multi_query=K00248+%23FFFFFF,red%0d%0aK00128+%23FFFFFF,red%0d%0a
BP	GO:0086002	cardiac muscle cell action potential involved in contraction	2	2	4	29	ENSBGRG00000004337(KCNH2),ENSBGRG00000022985(SCN4B)	ENSBGRG00000011476(KCNN2),ENSBGRG00000012965(SCN3B)	0.00146231	0.149321		ko04936	Alcoholic liver disease	Human Diseases	Endocrine and metabolic disease	2	2	4	128	0.145921	0.85932	ENSBGRG00000026145(ALDH2),ENSBGRG00000018040(CD14)	ENSBGRG00000012579(FOXO1),ENSBGRG00000014262(PPARGC1A)	http://www.kegg.jp/kegg-bin/show_pathway?map=map04936&multi_query=K07202+%23FFFFFF,green%0d%0aK04391+%23FFFFFF,red%0d%0aK00128+%23FFFFFF,red%0d%0aK07201+%23FFFFFF,green%0d%0a
BP	GO:0055114	oxidation-reduction process	10	3	13	288	ENSBGRG00000002916(GPD1),ENSBGRG00000008276(SLC25A25),ENSBGRG00000010949(CYP2D6),ENSBGRG00000012014(ENO1),ENSBGRG00000013574(PKM),ENSBGRG00000014778(PGK1),ENSBGRG00000017531(CRAT),ENSBGRG00000017727(ILVBL),ENSBGRG00000021836(TPI1),ENSBGRG00000026412(ACADS)	ENSBGRG00000014262(PPARGC1A),ENSBGRG00000016397(CYP4V2),ENSBGRG00000021648(ENPP1)	0.00150561	0.149321		ko00620	Pyruvate metabolism	Metabolism	Carbohydrate metabolism	2	0	2	44	0.154265	0.85932	ENSBGRG00000026145(ALDH2),ENSBGRG00000013574(PKM)	-	http://www.kegg.jp/kegg-bin/show_pathway?map=map00620&multi_query=K00128+%23FFFFFF,red%0d%0aK00873+%23FFFFFF,red%0d%0a
BP	GO:0071220	cellular response to bacterial lipoprotein	1	1	2	4	ENSBGRG00000018040(CD14)	ENSBGRG00000017549(TLR2)	0.00173889	0.158474		ko04145	Phagosome	Cellular Processes	Transport and catabolism	3	1	4	131	0.154805	0.85932	ENSBGRG00000019125,ENSBGRG00000020812,ENSBGRG00000018040(CD14)	ENSBGRG00000017549(TLR2)	http://www.kegg.jp/kegg-bin/show_pathway?map=map04145&multi_query=K10159+%23FFFFFF,green%0d%0aK06751+%23FFFFFF,red%0d%0aK04391+%23FFFFFF,red%0d%0aK06752+%23FFFFFF,red%0d%0a
BP	GO:0071221	cellular response to bacterial lipopeptide	1	1	2	4	ENSBGRG00000018040(CD14)	ENSBGRG00000017549(TLR2)	0.00173889	0.158474		ko05330	Allograft rejection	Human Diseases	Immune disease	2	0	2	45	0.15985	0.85932	ENSBGRG00000019125,ENSBGRG00000020812	-	http://www.kegg.jp/kegg-bin/show_pathway?map=map05330&multi_query=K06752+%23FFFFFF,red%0d%0aK06751+%23FFFFFF,red%0d%0a
BP	GO:0071724	response to diacyl bacterial lipopeptide	1	1	2	4	ENSBGRG00000018040(CD14)	ENSBGRG00000017549(TLR2)	0.00173889	0.158474		ko00120	Primary bile acid biosynthesis	Metabolism	Lipid metabolism	1	0	1	11	0.161609	0.85932	ENSBGRG00000024359(HSD3B7)	-	http://www.kegg.jp/kegg-bin/show_pathway?map=map00120&multi_query=K12408+%23FFFFFF,red%0d%0a
BP	GO:0044282	small molecule catabolic process	11	0	11	225	ENSBGRG00000003404(ALDH4A1),ENSBGRG00000012014(ENO1),ENSBGRG00000013574(PKM),ENSBGRG00000014023(ADA),ENSBGRG00000014778(PGK1),ENSBGRG00000017531(CRAT),ENSBGRG00000017727(ILVBL),ENSBGRG00000019059(BCKDHA),ENSBGRG00000021836(TPI1),ENSBGRG00000026412(ACADS),ENSBGRG00000026875(ACSF3)	-	0.00184315	0.163555		ko04620	Toll-like receptor signaling pathway	Organismal Systems	Immune system	2	1	3	88	0.163924	0.85932	ENSBGRG00000018040(CD14),ENSBGRG00000009096(FOS)	ENSBGRG00000017549(TLR2)	http://www.kegg.jp/kegg-bin/show_pathway?map=map04620&multi_query=K04391+%23FFFFFF,red%0d%0aK10159+%23FFFFFF,green%0d%0aK04379+%23FFFFFF,red%0d%0a
BP	GO:0046034	ATP metabolic process	8	2	10	193	ENSBGRG00000001755,ENSBGRG00000002916(GPD1),ENSBGRG00000008276(SLC25A25),ENSBGRG00000012014(ENO1),ENSBGRG00000013574(PKM),ENSBGRG00000014778(PGK1),ENSBGRG00000021836(TPI1),ENSBGRG00000022167(GPI)	ENSBGRG00000014262(PPARGC1A),ENSBGRG00000021648(ENPP1)	0.00192513	0.16645		ko05222	Small cell lung cancer	Human Diseases	Cancer: specific types	3	0	3	88	0.163924	0.85932	ENSBGRG00000021195(LAMA5),ENSBGRG00000005083(COL4A2),ENSBGRG00000004437(COL4A1)	-	http://www.kegg.jp/kegg-bin/show_pathway?map=map05222&multi_query=K06237+%23FFFFFF,red%0d%0aK06240+%23FFFFFF,red%0d%0a
BP	GO:0071711	basement membrane organization	3	0	3	15	ENSBGRG00000004437(COL4A1),ENSBGRG00000017761(PXDN),ENSBGRG00000025536(PLOD3)	-	0.00197991	0.166906		ko04640	Hematopoietic cell lineage	Organismal Systems	Immune system	3	0	3	91	0.175641	0.85932	ENSBGRG00000019125,ENSBGRG00000007226,ENSBGRG00000018040(CD14)	-	http://www.kegg.jp/kegg-bin/show_pathway?map=map04640&multi_query=K04391+%23FFFFFF,red%0d%0aK06752+%23FFFFFF,red%0d%0aK04737+%23FFFFFF,red%0d%0a
BP	GO:0060612	adipose tissue development	2	2	4	33	ENSBGRG00000008276(SLC25A25),ENSBGRG00000022747(DYRK1B)	ENSBGRG00000014262(PPARGC1A),ENSBGRG00000025786(ARID5B)	0.00238723	0.188295		ko05165	Human papillomavirus infection	Human Diseases	Infectious disease: viral	6	1	7	292	0.181839	0.85932	ENSBGRG00000020812,ENSBGRG00000021195(LAMA5),ENSBGRG00000026252(PXN),ENSBGRG00000005083(COL4A2),ENSBGRG00000004437(COL4A1),ENSBGRG00000013574(PKM)	ENSBGRG00000012579(FOXO1)	http://www.kegg.jp/kegg-bin/show_pathway?map=map05165&multi_query=K05760+%23FFFFFF,red%0d%0aK07201+%23FFFFFF,green%0d%0aK06751+%23FFFFFF,red%0d%0aK06237+%23FFFFFF,red%0d%0aK06240+%23FFFFFF,red%0d%0aK00873+%23FFFFFF,red%0d%0a
BP	GO:0006090	pyruvate metabolic process	6	0	6	79	ENSBGRG00000002916(GPD1),ENSBGRG00000012014(ENO1),ENSBGRG00000013574(PKM),ENSBGRG00000014778(PGK1),ENSBGRG00000021836(TPI1),ENSBGRG00000022167(GPI)	-	0.00241007	0.188295		ko05332	Graft-versus-host disease	Human Diseases	Immune disease	2	0	2	49	0.182535	0.85932	ENSBGRG00000019125,ENSBGRG00000020812	-	http://www.kegg.jp/kegg-bin/show_pathway?map=map05332&multi_query=K06752+%23FFFFFF,red%0d%0aK06751+%23FFFFFF,red%0d%0a
BP	GO:0009185	ribonucleoside diphosphate metabolic process	6	0	6	79	ENSBGRG00000002916(GPD1),ENSBGRG00000012014(ENO1),ENSBGRG00000013574(PKM),ENSBGRG00000014778(PGK1),ENSBGRG00000021836(TPI1),ENSBGRG00000022167(GPI)	-	0.00241007	0.188295		ko04940	Type I diabetes mellitus	Human Diseases	Endocrine and metabolic disease	2	0	2	49	0.182535	0.85932	ENSBGRG00000019125,ENSBGRG00000020812	-	http://www.kegg.jp/kegg-bin/show_pathway?map=map04940&multi_query=K06752+%23FFFFFF,red%0d%0aK06751+%23FFFFFF,red%0d%0a
BP	GO:0009150	purine ribonucleotide metabolic process	9	2	11	234	ENSBGRG00000001755,ENSBGRG00000002916(GPD1),ENSBGRG00000012014(ENO1),ENSBGRG00000013574(PKM),ENSBGRG00000014023(ADA),ENSBGRG00000014778(PGK1),ENSBGRG00000021836(TPI1),ENSBGRG00000022167(GPI),ENSBGRG00000026159(NME3)	ENSBGRG00000014262(PPARGC1A),ENSBGRG00000021648(ENPP1)	0.00250418	0.188295		ko05144	Malaria	Human Diseases	Infectious disease: parasitic	0	2	2	51	0.194052	0.85932	-	ENSBGRG00000017549(TLR2),ENSBGRG00000020251	http://www.kegg.jp/kegg-bin/show_pathway?map=map05144&multi_query=K14624+%23FFFFFF,green%0d%0aK10159+%23FFFFFF,green%0d%0a
BP	GO:0009141	nucleoside triphosphate metabolic process	4	2	6	80	ENSBGRG00000001755,ENSBGRG00000012014(ENO1),ENSBGRG00000014023(ADA),ENSBGRG00000026159(NME3)	ENSBGRG00000014262(PPARGC1A),ENSBGRG00000021648(ENPP1)	0.00256867	0.188295		ko04931	Insulin resistance	Human Diseases	Endocrine and metabolic disease	1	2	3	97	0.199736	0.85932	ENSBGRG00000025244(SLC27A1)	ENSBGRG00000014262(PPARGC1A),ENSBGRG00000012579(FOXO1)	http://www.kegg.jp/kegg-bin/show_pathway?map=map04931&multi_query=K07201+%23FFFFFF,green%0d%0aK08745+%23FFFFFF,red%0d%0aK07202+%23FFFFFF,green%0d%0a
BP	GO:0062013	positive regulation of small molecule metabolic process	3	3	6	80	ENSBGRG00000002916(GPD1),ENSBGRG00000012014(ENO1),ENSBGRG00000012849(SLC45A3)	ENSBGRG00000011219(LHCGR),ENSBGRG00000012579(FOXO1),ENSBGRG00000014262(PPARGC1A)	0.00256867	0.188295		ko04066	HIF-1 signaling pathway	Environmental Information Processing	Signal transduction	2	1	3	98	0.203828	0.85932	ENSBGRG00000014778(PGK1),ENSBGRG00000012014(ENO1)	ENSBGRG00000003633(TF)	http://www.kegg.jp/kegg-bin/show_pathway?map=map04066&multi_query=K00927+%23FFFFFF,red%0d%0aK01689+%23FFFFFF,red%0d%0aK14736+%23FFFFFF,green%0d%0a
BP	GO:0060392	negative regulation of SMAD protein signal transduction	1	1	2	5	ENSBGRG00000025584(CILP)	ENSBGRG00000008695(PBLD)	0.00286519	0.194538		ko00240	Pyrimidine metabolism	Metabolism	Nucleotide metabolism	1	1	2	53	0.20566	0.85932	ENSBGRG00000019794(CANT1)	ENSBGRG00000021648(ENPP1)	http://www.kegg.jp/kegg-bin/show_pathway?map=map00240&multi_query=K12304+%23FFFFFF,red%0d%0aK01513+%23FFFFFF,green%0d%0a
BP	GO:0070339	response to bacterial lipopeptide	1	1	2	5	ENSBGRG00000018040(CD14)	ENSBGRG00000017549(TLR2)	0.00286519	0.194538		ko05320	Autoimmune thyroid disease	Human Diseases	Immune disease	2	0	2	53	0.20566	0.85932	ENSBGRG00000019125,ENSBGRG00000020812	-	http://www.kegg.jp/kegg-bin/show_pathway?map=map05320&multi_query=K06751+%23FFFFFF,red%0d%0aK06752+%23FFFFFF,red%0d%0a
BP	GO:0070831	basement membrane assembly	2	0	2	5	ENSBGRG00000017761(PXDN),ENSBGRG00000025536(PLOD3)	-	0.00286519	0.194538		ko05142	Chagas disease	Human Diseases	Infectious disease: parasitic	1	2	3	101	0.216221	0.85932	ENSBGRG00000009096(FOS)	ENSBGRG00000017549(TLR2),ENSBGRG00000020251	http://www.kegg.jp/kegg-bin/show_pathway?map=map05142&multi_query=K10159+%23FFFFFF,green%0d%0aK04379+%23FFFFFF,red%0d%0aK14624+%23FFFFFF,green%0d%0a
BP	GO:0086019	cell-cell signaling involved in cardiac conduction	1	2	3	17	ENSBGRG00000022985(SCN4B)	ENSBGRG00000011476(KCNN2),ENSBGRG00000012965(SCN3B)	0.00288461	0.194538		ko04929	GnRH secretion	Organismal Systems	Endocrine system	0	2	2	55	0.217343	0.85932	-	ENSBGRG00000011476(KCNN2),ENSBGRG00000026088(KCNN1)	http://www.kegg.jp/kegg-bin/show_pathway?map=map04929&multi_query=K04943+%23FFFFFF,green%0d%0aK04942+%23FFFFFF,green%0d%0a
BP	GO:0009117	nucleotide metabolic process	10	3	13	311	ENSBGRG00000001755,ENSBGRG00000002916(GPD1),ENSBGRG00000012014(ENO1),ENSBGRG00000013574(PKM),ENSBGRG00000014023(ADA),ENSBGRG00000014778(PGK1),ENSBGRG00000019722,ENSBGRG00000021836(TPI1),ENSBGRG00000022167(GPI),ENSBGRG00000026159(NME3)	ENSBGRG00000007410(NAMPT),ENSBGRG00000014262(PPARGC1A),ENSBGRG00000021648(ENPP1)	0.00294957	0.195019		ko00310	Lysine degradation	Metabolism	Amino acid metabolism	2	0	2	58	0.234972	0.85932	ENSBGRG00000026145(ALDH2),ENSBGRG00000025536(PLOD3)	-	http://www.kegg.jp/kegg-bin/show_pathway?map=map00310&multi_query=K13646+%23FFFFFF,red%0d%0aK00128+%23FFFFFF,red%0d%0a
BP	GO:0090407	organophosphate biosynthetic process	10	3	13	313	ENSBGRG00000001755,ENSBGRG00000005144(MOCS3),ENSBGRG00000009666(PIK3C2B),ENSBGRG00000012014(ENO1),ENSBGRG00000012134(PIGL),ENSBGRG00000014023(ADA),ENSBGRG00000019722,ENSBGRG00000021836(TPI1),ENSBGRG00000025244(SLC27A1),ENSBGRG00000026159(NME3)	ENSBGRG00000007410(NAMPT),ENSBGRG00000011219(LHCGR),ENSBGRG00000014262(PPARGC1A)	0.00311584	0.20205		ko05152	Tuberculosis	Human Diseases	Infectious disease: bacterial	3	1	4	156	0.235623	0.85932	ENSBGRG00000019125,ENSBGRG00000018040(CD14),ENSBGRG00000023432(IL10RA)	ENSBGRG00000017549(TLR2)	http://www.kegg.jp/kegg-bin/show_pathway?map=map05152&multi_query=K06752+%23FFFFFF,red%0d%0aK10159+%23FFFFFF,green%0d%0aK04391+%23FFFFFF,red%0d%0aK05134+%23FFFFFF,red%0d%0a
BP	GO:0005975	carbohydrate metabolic process	9	6	15	390	ENSBGRG00000002916(GPD1),ENSBGRG00000006288(FBP2),ENSBGRG00000012014(ENO1),ENSBGRG00000012849(SLC45A3),ENSBGRG00000013574(PKM),ENSBGRG00000014778(PGK1),ENSBGRG00000021836(TPI1),ENSBGRG00000022167(GPI),ENSBGRG00000022933(BRAT1)	ENSBGRG00000003576(KLB),ENSBGRG00000011219(LHCGR),ENSBGRG00000012579(FOXO1),ENSBGRG00000012722(CASD1),ENSBGRG00000014262(PPARGC1A),ENSBGRG00000021648(ENPP1)	0.00320653	0.204008		ko00053	Ascorbate and aldarate metabolism	Metabolism	Carbohydrate metabolism	1	0	1	17	0.238551	0.85932	ENSBGRG00000026145(ALDH2)	-	http://www.kegg.jp/kegg-bin/show_pathway?map=map00053&multi_query=K00128+%23FFFFFF,red%0d%0a
BP	GO:0006753	nucleoside phosphate metabolic process	10	3	13	319	ENSBGRG00000001755,ENSBGRG00000002916(GPD1),ENSBGRG00000012014(ENO1),ENSBGRG00000013574(PKM),ENSBGRG00000014023(ADA),ENSBGRG00000014778(PGK1),ENSBGRG00000019722,ENSBGRG00000021836(TPI1),ENSBGRG00000022167(GPI),ENSBGRG00000026159(NME3)	ENSBGRG00000007410(NAMPT),ENSBGRG00000014262(PPARGC1A),ENSBGRG00000021648(ENPP1)	0.00366111	0.225093		ko00061	Fatty acid biosynthesis	Metabolism	Lipid metabolism	1	0	1	17	0.238551	0.85932	ENSBGRG00000026875(ACSF3)	-	http://www.kegg.jp/kegg-bin/show_pathway?map=map00061&multi_query=K18660+%23FFFFFF,red%0d%0a
BP	GO:0006163	purine nucleotide metabolic process	9	2	11	246	ENSBGRG00000001755,ENSBGRG00000002916(GPD1),ENSBGRG00000012014(ENO1),ENSBGRG00000013574(PKM),ENSBGRG00000014023(ADA),ENSBGRG00000014778(PGK1),ENSBGRG00000021836(TPI1),ENSBGRG00000022167(GPI),ENSBGRG00000026159(NME3)	ENSBGRG00000014262(PPARGC1A),ENSBGRG00000021648(ENPP1)	0.00367144	0.225093		ko04152	AMPK signaling pathway	Environmental Information Processing	Signal transduction	1	2	3	108	0.24571	0.85932	ENSBGRG00000006288(FBP2)	ENSBGRG00000012579(FOXO1),ENSBGRG00000014262(PPARGC1A)	http://www.kegg.jp/kegg-bin/show_pathway?map=map04152&multi_query=K07202+%23FFFFFF,green%0d%0aK07201+%23FFFFFF,green%0d%0aK03841+%23FFFFFF,red%0d%0a
BP	GO:0009259	ribonucleotide metabolic process	9	2	11	247	ENSBGRG00000001755,ENSBGRG00000002916(GPD1),ENSBGRG00000012014(ENO1),ENSBGRG00000013574(PKM),ENSBGRG00000014023(ADA),ENSBGRG00000014778(PGK1),ENSBGRG00000021836(TPI1),ENSBGRG00000022167(GPI),ENSBGRG00000026159(NME3)	ENSBGRG00000014262(PPARGC1A),ENSBGRG00000021648(ENPP1)	0.00378562	0.22629		ko04659	Th17 cell differentiation	Organismal Systems	Immune system	2	1	3	110	0.254257	0.85932	ENSBGRG00000019125,ENSBGRG00000009096(FOS)	ENSBGRG00000000718	http://www.kegg.jp/kegg-bin/show_pathway?map=map04659&multi_query=K04723+%23FFFFFF,green%0d%0aK06752+%23FFFFFF,red%0d%0aK04379+%23FFFFFF,red%0d%0a
BP	GO:0031667	response to nutrient levels	6	4	10	213	ENSBGRG00000001080(ELAPOR1),ENSBGRG00000008094(KLF10),ENSBGRG00000008276(SLC25A25),ENSBGRG00000009666(PIK3C2B),ENSBGRG00000011484(SFRP1),ENSBGRG00000013936(MYBBP1A)	ENSBGRG00000009051(ACVR1C),ENSBGRG00000012579(FOXO1),ENSBGRG00000014262(PPARGC1A),ENSBGRG00000021648(ENPP1)	0.00392118	0.22629		ko05416	Viral myocarditis	Human Diseases	Cardiovascular disease	2	0	2	64	0.270428	0.85932	ENSBGRG00000020812,ENSBGRG00000019125	-	http://www.kegg.jp/kegg-bin/show_pathway?map=map05416&multi_query=K06752+%23FFFFFF,red%0d%0aK06751+%23FFFFFF,red%0d%0a
BP	GO:0009144	purine nucleoside triphosphate metabolic process	4	1	5	61	ENSBGRG00000001755,ENSBGRG00000012014(ENO1),ENSBGRG00000014023(ADA),ENSBGRG00000026159(NME3)	ENSBGRG00000014262(PPARGC1A)	0.00397675	0.22629		ko04926	Relaxin signaling pathway	Organismal Systems	Endocrine system	3	0	3	114	0.271473	0.85932	ENSBGRG00000009096(FOS),ENSBGRG00000004437(COL4A1),ENSBGRG00000005083(COL4A2)	-	http://www.kegg.jp/kegg-bin/show_pathway?map=map04926&multi_query=K06237+%23FFFFFF,red%0d%0aK04379+%23FFFFFF,red%0d%0a
BP	GO:0019693	ribose phosphate metabolic process	9	2	11	249	ENSBGRG00000001755,ENSBGRG00000002916(GPD1),ENSBGRG00000012014(ENO1),ENSBGRG00000013574(PKM),ENSBGRG00000014023(ADA),ENSBGRG00000014778(PGK1),ENSBGRG00000021836(TPI1),ENSBGRG00000022167(GPI),ENSBGRG00000026159(NME3)	ENSBGRG00000014262(PPARGC1A),ENSBGRG00000021648(ENPP1)	0.00402251	0.22629		ko00340	Histidine metabolism	Metabolism	Amino acid metabolism	1	0	1	20	0.274354	0.85932	ENSBGRG00000026145(ALDH2)	-	http://www.kegg.jp/kegg-bin/show_pathway?map=map00340&multi_query=K00128+%23FFFFFF,red%0d%0a
BP	GO:0086003	cardiac muscle cell contraction	2	2	4	38	ENSBGRG00000004337(KCNH2),ENSBGRG00000022985(SCN4B)	ENSBGRG00000011476(KCNN2),ENSBGRG00000012965(SCN3B)	0.00402652	0.22629		ko04371	Apelin signaling pathway	Environmental Information Processing	Signal transduction	1	2	3	115	0.275798	0.85932	ENSBGRG00000013193(MYL3)	ENSBGRG00000012778(CDH1),ENSBGRG00000014262(PPARGC1A)	http://www.kegg.jp/kegg-bin/show_pathway?map=map04371&multi_query=K05689+%23FFFFFF,green%0d%0aK12749+%23FFFFFF,red%0d%0aK07202+%23FFFFFF,green%0d%0a
BP	GO:0002314	germinal center B cell differentiation	1	1	2	6	ENSBGRG00000014023(ADA)	ENSBGRG00000008888(CDH17)	0.00424896	0.226496		ko00230	Purine metabolism	Metabolism	Nucleotide metabolism	2	1	3	116	0.280131	0.85932	ENSBGRG00000014023(ADA),ENSBGRG00000019794(CANT1)	ENSBGRG00000021648(ENPP1)	http://www.kegg.jp/kegg-bin/show_pathway?map=map00230&multi_query=K12304+%23FFFFFF,red%0d%0aK01513+%23FFFFFF,green%0d%0aK01488+%23FFFFFF,red%0d%0a
BP	GO:0030210	heparin biosynthetic process	1	1	2	6	ENSBGRG00000006039(XYLT2)	ENSBGRG00000020997(GLCE)	0.00424896	0.226496		ko04917	Prolactin signaling pathway	Organismal Systems	Endocrine system	1	1	2	66	0.282257	0.85932	ENSBGRG00000009096(FOS)	ENSBGRG00000011219(LHCGR)	http://www.kegg.jp/kegg-bin/show_pathway?map=map04917&multi_query=K04248+%23FFFFFF,green%0d%0aK04379+%23FFFFFF,red%0d%0a
BP	GO:0032493	response to bacterial lipoprotein	1	1	2	6	ENSBGRG00000018040(CD14)	ENSBGRG00000017549(TLR2)	0.00424896	0.226496		ko00515	Mannose type O-glycan biosynthesis	Metabolism	Glycan biosynthesis and metabolism	1	0	1	21	0.285913	0.85932	ENSBGRG00000002161(POMGNT1)	-	http://www.kegg.jp/kegg-bin/show_pathway?map=map00515&multi_query=K09666+%23FFFFFF,red%0d%0a
BP	GO:0006928	movement of cell or subcellular component	25	11	36	1330	ENSBGRG00000000313(CCN1),ENSBGRG00000000523(NR4A1),ENSBGRG00000003011(PODN),ENSBGRG00000003703(CENPE),ENSBGRG00000004337(KCNH2),ENSBGRG00000005949(ARHGEF39),ENSBGRG00000006266(S100A14),ENSBGRG00000007584(PRAG1),ENSBGRG00000008356(KIF4A),ENSBGRG00000011484(SFRP1),ENSBGRG00000013842(ACAP3),ENSBGRG00000014023(ADA),ENSBGRG00000016981(KIFC1),ENSBGRG00000017135(PLEKHO1),ENSBGRG00000017288(ADGRG1),ENSBG…	ENSBGRG00000003633(TF),ENSBGRG00000009051(ACVR1C),ENSBGRG00000011476(KCNN2),ENSBGRG00000012363(SDC4),ENSBGRG00000012778(CDH1),ENSBGRG00000012965(SCN3B),ENSBGRG00000015268(PTPRK),ENSBGRG00000018400,ENSBGRG00000019923(GCNT1),ENSBGRG00000020150(ULK4),ENSBGRG00000025786(ARID5B)	0.00429886	0.226496		ko05133	Pertussis	Human Diseases	Infectious disease: bacterial	2	0	2	67	0.288167	0.85932	ENSBGRG00000018040(CD14),ENSBGRG00000009096(FOS)	-	http://www.kegg.jp/kegg-bin/show_pathway?map=map05133&multi_query=K04379+%23FFFFFF,red%0d%0aK04391+%23FFFFFF,red%0d%0a
BP	GO:0086001	cardiac muscle cell action potential	2	2	4	39	ENSBGRG00000004337(KCNH2),ENSBGRG00000022985(SCN4B)	ENSBGRG00000011476(KCNN2),ENSBGRG00000012965(SCN3B)	0.00442692	0.229655		ko05131	Shigellosis	Human Diseases	Infectious disease: bacterial	3	2	5	228	0.295958	0.85932	ENSBGRG00000017840(ARF6),ENSBGRG00000026252(PXN),ENSBGRG00000018040(CD14)	ENSBGRG00000007270(NLRC4),ENSBGRG00000012579(FOXO1)	http://www.kegg.jp/kegg-bin/show_pathway?map=map05131&multi_query=K07941+%23FFFFFF,red%0d%0aK05760+%23FFFFFF,red%0d%0aK12805+%23FFFFFF,green%0d%0aK07201+%23FFFFFF,green%0d%0aK04391+%23FFFFFF,red%0d%0a
BP	GO:2000649	regulation of sodium ion transmembrane transporter activity	2	1	3	20	ENSBGRG00000021840(OSR1),ENSBGRG00000022985(SCN4B)	ENSBGRG00000012965(SCN3B)	0.00465516	0.237836		ko05100	Bacterial invasion of epithelial cells	Human Diseases	Infectious disease: bacterial	1	1	2	69	0.299971	0.85932	ENSBGRG00000026252(PXN)	ENSBGRG00000012778(CDH1)	http://www.kegg.jp/kegg-bin/show_pathway?map=map05100&multi_query=K05760+%23FFFFFF,red%0d%0aK05689+%23FFFFFF,green%0d%0a
BP	GO:0043436	oxoacid metabolic process	17	3	20	613	ENSBGRG00000002916(GPD1),ENSBGRG00000003404(ALDH4A1),ENSBGRG00000006039(XYLT2),ENSBGRG00000012014(ENO1),ENSBGRG00000012849(SLC45A3),ENSBGRG00000012998(ABCC10),ENSBGRG00000013574(PKM),ENSBGRG00000014778(PGK1),ENSBGRG00000015533(GAMT),ENSBGRG00000017531(CRAT),ENSBGRG00000017727(ILVBL),ENSBGRG00000019059(BCKDHA),ENSBGRG00000021836(TPI1),ENSBGRG00000022167(GPI),ENSBGRG00000025536(PLOD3),ENSBGRG000000…	ENSBGRG00000016397(CYP4V2),ENSBGRG00000020997(GLCE),ENSBGRG00000021648(ENPP1)	0.00476021	0.239573		ko04910	Insulin signaling pathway	Organismal Systems	Endocrine system	1	2	3	121	0.301884	0.85932	ENSBGRG00000006288(FBP2)	ENSBGRG00000012579(FOXO1),ENSBGRG00000014262(PPARGC1A)	http://www.kegg.jp/kegg-bin/show_pathway?map=map04910&multi_query=K03841+%23FFFFFF,red%0d%0aK07201+%23FFFFFF,green%0d%0aK07202+%23FFFFFF,green%0d%0a
BP	GO:1901137	carbohydrate derivative biosynthetic process	12	3	15	409	ENSBGRG00000001755,ENSBGRG00000002161(POMGNT1),ENSBGRG00000005603(TMEM106A),ENSBGRG00000006039(XYLT2),ENSBGRG00000008937(EXTL1),ENSBGRG00000012014(ENO1),ENSBGRG00000012134(PIGL),ENSBGRG00000014023(ADA),ENSBGRG00000019794(CANT1),ENSBGRG00000021836(TPI1),ENSBGRG00000025536(PLOD3),ENSBGRG00000026159(NME3)	ENSBGRG00000014262(PPARGC1A),ENSBGRG00000019923(GCNT1),ENSBGRG00000020997(GLCE)	0.0049716	0.246533		ko05203	Viral carcinogenesis	Human Diseases	Cancer: overview	4	0	4	177	0.309778	0.85932	ENSBGRG00000020812,ENSBGRG00000016458,ENSBGRG00000026252(PXN),ENSBGRG00000013574(PKM)	-	http://www.kegg.jp/kegg-bin/show_pathway?map=map05203&multi_query=K05760+%23FFFFFF,red%0d%0aK06751+%23FFFFFF,red%0d%0aK00873+%23FFFFFF,red%0d%0aK11252+%23FFFFFF,red%0d%0a
BP	GO:0032787	monocarboxylic acid metabolic process	12	1	13	332	ENSBGRG00000002916(GPD1),ENSBGRG00000012014(ENO1),ENSBGRG00000012849(SLC45A3),ENSBGRG00000013574(PKM),ENSBGRG00000014778(PGK1),ENSBGRG00000015533(GAMT),ENSBGRG00000017531(CRAT),ENSBGRG00000017727(ILVBL),ENSBGRG00000021836(TPI1),ENSBGRG00000022167(GPI),ENSBGRG00000026412(ACADS),ENSBGRG00000026875(ACSF3)	ENSBGRG00000016397(CYP4V2)	0.00510993	0.247625		ko04612	Antigen processing and presentation	Organismal Systems	Immune system	2	0	2	71	0.311744	0.85932	ENSBGRG00000020812,ENSBGRG00000019125	-	http://www.kegg.jp/kegg-bin/show_pathway?map=map04612&multi_query=K06752+%23FFFFFF,red%0d%0aK06751+%23FFFFFF,red%0d%0a
BP	GO:0016052	carbohydrate catabolic process	6	0	6	92	ENSBGRG00000002916(GPD1),ENSBGRG00000012014(ENO1),ENSBGRG00000013574(PKM),ENSBGRG00000014778(PGK1),ENSBGRG00000021836(TPI1),ENSBGRG00000022167(GPI)	-	0.0051405	0.247625		ko05321	Inflammatory bowel disease	Human Diseases	Immune disease	1	1	2	71	0.311744	0.85932	ENSBGRG00000019125	ENSBGRG00000017549(TLR2)	http://www.kegg.jp/kegg-bin/show_pathway?map=map05321&multi_query=K10159+%23FFFFFF,green%0d%0aK06752+%23FFFFFF,red%0d%0a
BP	GO:0010954	positive regulation of protein processing	2	1	3	21	ENSBGRG00000007004(NKD2),ENSBGRG00000012014(ENO1)	ENSBGRG00000007270(NLRC4)	0.00536259	0.247708		ko03320	PPAR signaling pathway	Organismal Systems	Endocrine system	2	0	2	72	0.317616	0.85932	ENSBGRG00000025244(SLC27A1),ENSBGRG00000025096(ANGPTL4)	-	http://www.kegg.jp/kegg-bin/show_pathway?map=map03320&multi_query=K08767+%23FFFFFF,red%0d%0aK08745+%23FFFFFF,red%0d%0a
BP	GO:0045981	positive regulation of nucleotide metabolic process	2	1	3	21	ENSBGRG00000002916(GPD1),ENSBGRG00000012014(ENO1)	ENSBGRG00000014262(PPARGC1A)	0.00536259	0.247708		ko05418	Fluid shear stress and atherosclerosis	Human Diseases	Cardiovascular disease	1	2	3	125	0.319354	0.85932	ENSBGRG00000009096(FOS)	ENSBGRG00000020251,ENSBGRG00000012363(SDC4)	http://www.kegg.jp/kegg-bin/show_pathway?map=map05418&multi_query=K04379+%23FFFFFF,red%0d%0aK14624+%23FFFFFF,green%0d%0aK16338+%23FFFFFF,green%0d%0a
BP	GO:1900544	positive regulation of purine nucleotide metabolic process	2	1	3	21	ENSBGRG00000002916(GPD1),ENSBGRG00000012014(ENO1)	ENSBGRG00000014262(PPARGC1A)	0.00536259	0.247708		ko00650	Butanoate metabolism	Metabolism	Carbohydrate metabolism	1	0	1	24	0.319507	0.85932	ENSBGRG00000026412(ACADS)	-	http://www.kegg.jp/kegg-bin/show_pathway?map=map00650&multi_query=K00248+%23FFFFFF,red%0d%0a
BP	GO:0006082	organic acid metabolic process	17	3	20	623	ENSBGRG00000002916(GPD1),ENSBGRG00000003404(ALDH4A1),ENSBGRG00000006039(XYLT2),ENSBGRG00000012014(ENO1),ENSBGRG00000012849(SLC45A3),ENSBGRG00000012998(ABCC10),ENSBGRG00000013574(PKM),ENSBGRG00000014778(PGK1),ENSBGRG00000015533(GAMT),ENSBGRG00000017531(CRAT),ENSBGRG00000017727(ILVBL),ENSBGRG00000019059(BCKDHA),ENSBGRG00000021836(TPI1),ENSBGRG00000022167(GPI),ENSBGRG00000025536(PLOD3),ENSBGRG000000…	ENSBGRG00000016397(CYP4V2),ENSBGRG00000020997(GLCE),ENSBGRG00000021648(ENPP1)	0.00567644	0.247887		ko04510	Focal adhesion	Cellular Processes	Cellular community - eukaryotes	4	0	4	181	0.324232	0.85932	ENSBGRG00000021195(LAMA5),ENSBGRG00000026252(PXN),ENSBGRG00000005083(COL4A2),ENSBGRG00000004437(COL4A1)	-	http://www.kegg.jp/kegg-bin/show_pathway?map=map04510&multi_query=K06237+%23FFFFFF,red%0d%0aK05760+%23FFFFFF,red%0d%0aK06240+%23FFFFFF,red%0d%0a
BP	GO:0045913	positive regulation of carbohydrate metabolic process	2	2	4	42	ENSBGRG00000002916(GPD1),ENSBGRG00000012849(SLC45A3)	ENSBGRG00000011219(LHCGR),ENSBGRG00000012579(FOXO1)	0.00578701	0.247887		ko04392	Hippo signaling pathway - multiple species	Environmental Information Processing	Signal transduction	0	1	1	25	0.330353	0.85932	-	ENSBGRG00000004102(STK3)	http://www.kegg.jp/kegg-bin/show_pathway?map=map04392&multi_query=K04412+%23FFFFFF,green%0d%0a
BP	GO:0010226	response to lithium ion	1	1	2	7	ENSBGRG00000026269(MYOG)	ENSBGRG00000012778(CDH1)	0.00588106	0.247887		ko05417	Lipid and atherosclerosis	Human Diseases	Cardiovascular disease	2	2	4	185	0.338735	0.85932	ENSBGRG00000009096(FOS),ENSBGRG00000018040(CD14)	ENSBGRG00000017549(TLR2),ENSBGRG00000020251	http://www.kegg.jp/kegg-bin/show_pathway?map=map05417&multi_query=K10159+%23FFFFFF,green%0d%0aK14624+%23FFFFFF,green%0d%0aK04391+%23FFFFFF,red%0d%0aK04379+%23FFFFFF,red%0d%0a
BP	GO:0070391	response to lipoteichoic acid	1	1	2	7	ENSBGRG00000018040(CD14)	ENSBGRG00000017549(TLR2)	0.00588106	0.247887		ko04911	Insulin secretion	Organismal Systems	Endocrine system	0	2	2	76	0.340982	0.85932	-	ENSBGRG00000011476(KCNN2),ENSBGRG00000026088(KCNN1)	http://www.kegg.jp/kegg-bin/show_pathway?map=map04911&multi_query=K04943+%23FFFFFF,green%0d%0aK04942+%23FFFFFF,green%0d%0a
BP	GO:0071223	cellular response to lipoteichoic acid	1	1	2	7	ENSBGRG00000018040(CD14)	ENSBGRG00000017549(TLR2)	0.00588106	0.247887		ko04146	Peroxisome	Cellular Processes	Transport and catabolism	2	0	2	77	0.346788	0.85932	ENSBGRG00000010057(PEX16),ENSBGRG00000017531(CRAT)	-	http://www.kegg.jp/kegg-bin/show_pathway?map=map04146&multi_query=K13335+%23FFFFFF,red%0d%0aK00624+%23FFFFFF,red%0d%0a
BP	GO:0071285	cellular response to lithium ion	1	1	2	7	ENSBGRG00000026269(MYOG)	ENSBGRG00000012778(CDH1)	0.00588106	0.247887		ko04061	Viral protein interaction with cytokine and cytokine receptor	Environmental Information Processing	Signaling molecules and interaction	1	1	2	77	0.346788	0.85932	ENSBGRG00000023432(IL10RA)	ENSBGRG00000020251	http://www.kegg.jp/kegg-bin/show_pathway?map=map04061&multi_query=K14624+%23FFFFFF,green%0d%0aK05134+%23FFFFFF,red%0d%0a
BP	GO:2001171	positive regulation of ATP biosynthetic process	1	1	2	7	ENSBGRG00000012014(ENO1)	ENSBGRG00000014262(PPARGC1A)	0.00588106	0.247887		ko00563	Glycosylphosphatidylinositol (GPI)-anchor biosynthesis	Metabolism	Glycan biosynthesis and metabolism	1	0	1	27	0.351533	0.85932	ENSBGRG00000012134(PIGL)	-	http://www.kegg.jp/kegg-bin/show_pathway?map=map00563&multi_query=K03434+%23FFFFFF,red%0d%0a
BP	GO:0099622	cardiac muscle cell membrane repolarization	2	1	3	22	ENSBGRG00000004337(KCNH2),ENSBGRG00000022985(SCN4B)	ENSBGRG00000011476(KCNN2)	0.00613115	0.255238		ko04211	Longevity regulating pathway	Organismal Systems	Aging	0	2	2	78	0.352577	0.85932	-	ENSBGRG00000014262(PPARGC1A),ENSBGRG00000012579(FOXO1)	http://www.kegg.jp/kegg-bin/show_pathway?map=map04211&multi_query=K07201+%23FFFFFF,green%0d%0aK07202+%23FFFFFF,green%0d%0a
BP	GO:0031668	cellular response to extracellular stimulus	7	1	8	159	ENSBGRG00000001080(ELAPOR1),ENSBGRG00000008094(KLF10),ENSBGRG00000009096(FOS),ENSBGRG00000009666(PIK3C2B),ENSBGRG00000011484(SFRP1),ENSBGRG00000013936(MYBBP1A),ENSBGRG00000020110(AXL)	ENSBGRG00000012579(FOXO1)	0.00636195	0.261616		ko05163	Human cytomegalovirus infection	Human Diseases	Infectious disease: viral	3	1	4	189	0.353268	0.85932	ENSBGRG00000026252(PXN),ENSBGRG00000023432(IL10RA),ENSBGRG00000020812	ENSBGRG00000020251	http://www.kegg.jp/kegg-bin/show_pathway?map=map05163&multi_query=K14624+%23FFFFFF,green%0d%0aK05760+%23FFFFFF,red%0d%0aK05134+%23FFFFFF,red%0d%0aK06751+%23FFFFFF,red%0d%0a
BP	GO:0016477	cell migration	20	7	27	943	ENSBGRG00000000313(CCN1),ENSBGRG00000000523(NR4A1),ENSBGRG00000003011(PODN),ENSBGRG00000005949(ARHGEF39),ENSBGRG00000006266(S100A14),ENSBGRG00000007584(PRAG1),ENSBGRG00000011484(SFRP1),ENSBGRG00000013842(ACAP3),ENSBGRG00000014023(ADA),ENSBGRG00000017135(PLEKHO1),ENSBGRG00000017288(ADGRG1),ENSBGRG00000017664(PRKD2),ENSBGRG00000017840(ARF6),ENSBGRG00000020110(AXL),ENSBGRG00000021195(LAMA5),ENSBGRG0…	ENSBGRG00000009051(ACVR1C),ENSBGRG00000012363(SDC4),ENSBGRG00000012778(CDH1),ENSBGRG00000015268(PTPRK),ENSBGRG00000019923(GCNT1),ENSBGRG00000020150(ULK4),ENSBGRG00000025786(ARID5B)	0.00652368	0.265034		ko05170	Human immunodeficiency virus 1 infection	Human Diseases	Infectious disease: viral	3	1	4	191	0.360538	0.85932	ENSBGRG00000009096(FOS),ENSBGRG00000020812,ENSBGRG00000026252(PXN)	ENSBGRG00000017549(TLR2)	http://www.kegg.jp/kegg-bin/show_pathway?map=map05170&multi_query=K10159+%23FFFFFF,green%0d%0aK04379+%23FFFFFF,red%0d%0aK05760+%23FFFFFF,red%0d%0aK06751+%23FFFFFF,red%0d%0a
BP	GO:0072521	purine-containing compound metabolic process	9	2	11	267	ENSBGRG00000001755,ENSBGRG00000002916(GPD1),ENSBGRG00000012014(ENO1),ENSBGRG00000013574(PKM),ENSBGRG00000014023(ADA),ENSBGRG00000014778(PGK1),ENSBGRG00000021836(TPI1),ENSBGRG00000022167(GPI),ENSBGRG00000026159(NME3)	ENSBGRG00000014262(PPARGC1A),ENSBGRG00000021648(ENPP1)	0.00673026	0.269843		ko04657	IL-17 signaling pathway	Organismal Systems	Immune system	1	1	2	80	0.364102	0.85932	ENSBGRG00000009096(FOS)	ENSBGRG00000020251	http://www.kegg.jp/kegg-bin/show_pathway?map=map04657&multi_query=K14624+%23FFFFFF,green%0d%0aK04379+%23FFFFFF,red%0d%0a
BP	GO:0086091	regulation of heart rate by cardiac conduction	2	1	3	23	ENSBGRG00000004337(KCNH2),ENSBGRG00000022985(SCN4B)	ENSBGRG00000012965(SCN3B)	0.00696214	0.269843		ko04925	Aldosterone synthesis and secretion	Organismal Systems	Endocrine system	2	0	2	82	0.37555	0.85932	ENSBGRG00000017664(PRKD2),ENSBGRG00000000523(NR4A1)	-	http://www.kegg.jp/kegg-bin/show_pathway?map=map04925&multi_query=K06070+%23FFFFFF,red%0d%0aK04465+%23FFFFFF,red%0d%0a
BP	GO:1903319	positive regulation of protein maturation	2	1	3	23	ENSBGRG00000007004(NKD2),ENSBGRG00000012014(ENO1)	ENSBGRG00000007270(NLRC4)	0.00696214	0.269843		ko04390	Hippo signaling pathway	Environmental Information Processing	Signal transduction	1	2	3	138	0.376074	0.85932	ENSBGRG00000007004(NKD2)	ENSBGRG00000012778(CDH1),ENSBGRG00000004102(STK3)	http://www.kegg.jp/kegg-bin/show_pathway?map=map04390&multi_query=K05689+%23FFFFFF,green%0d%0aK03213+%23FFFFFF,red%0d%0aK04412+%23FFFFFF,green%0d%0a
BP	GO:1903580	positive regulation of ATP metabolic process	2	1	3	23	ENSBGRG00000002916(GPD1),ENSBGRG00000012014(ENO1)	ENSBGRG00000014262(PPARGC1A)	0.00696214	0.269843		ko00860	Porphyrin metabolism	Metabolism	Metabolism of cofactors and vitamins	1	0	1	30	0.382065	0.85932	ENSBGRG00000001124(PPOX)	-	http://www.kegg.jp/kegg-bin/show_pathway?map=map00860&multi_query=K00231+%23FFFFFF,red%0d%0a
BP	GO:0008152	metabolic process	108	52	160	8205	ENSBGRG00000000257(SLX9),ENSBGRG00000000313(CCN1),ENSBGRG00000000523(NR4A1),ENSBGRG00000001080(ELAPOR1),ENSBGRG00000001124(PPOX),ENSBGRG00000001755,ENSBGRG00000001765(DIP2A),ENSBGRG00000002161(POMGNT1),ENSBGRG00000002480(SOX7),ENSBGRG00000002593(ATP13A2),ENSBGRG00000002916(GPD1),ENSBGRG00000003335(HECTD3),ENSBGRG00000003404(ALDH4A1),ENSBGRG00000003703(CENPE),ENSBGRG00000003738(CC2D1B),ENSBGRG0000…	ENSBGRG00000001029(GTF3C3),ENSBGRG00000001610(GABPB2),ENSBGRG00000002918(PFDN5),ENSBGRG00000003232(LRIF1),ENSBGRG00000003528(WDR75),ENSBGRG00000003542(PRIM1),ENSBGRG00000003576(KLB),ENSBGRG00000003633(TF),ENSBGRG00000004102(STK3),ENSBGRG00000005859(TADA1),ENSBGRG00000006896(TRIP13),ENSBGRG00000007139(KLHL15),ENSBGRG00000007270(NLRC4),ENSBGRG00000007410(NAMPT),ENSBGRG00000007957(PLCH1),ENSBGRG0000…	0.00710366	0.270112		ko04130	SNARE interactions in vesicular transport	Genetic Information Processing	Folding, sorting and degradation	1	0	1	30	0.382065	0.85932	ENSBGRG00000011900(STX6)	-	http://www.kegg.jp/kegg-bin/show_pathway?map=map04130&multi_query=K08498+%23FFFFFF,red%0d%0a
BP	GO:0014850	response to muscle activity	1	1	2	8	ENSBGRG00000007772(METRNL)	ENSBGRG00000014262(PPARGC1A)	0.00775259	0.270112		ko04070	Phosphatidylinositol signaling system	Environmental Information Processing	Signal transduction	1	1	2	84	0.386916	0.85932	ENSBGRG00000009666(PIK3C2B)	ENSBGRG00000009254(PIK3C2A)	http://www.kegg.jp/kegg-bin/show_pathway?map=map04070&multi_query=K00923+%23FFFFFF,purple%0d%0a
BP	GO:0016266	O-glycan processing	1	1	2	8	ENSBGRG00000002161(POMGNT1)	ENSBGRG00000019923(GCNT1)	0.00775259	0.270112		ko04010	MAPK signaling pathway	Environmental Information Processing	Signal transduction	3	2	5	257	0.387662	0.85932	ENSBGRG00000009096(FOS),ENSBGRG00000018040(CD14),ENSBGRG00000000523(NR4A1)	ENSBGRG00000004102(STK3),ENSBGRG00000000718	http://www.kegg.jp/kegg-bin/show_pathway?map=map04010&multi_query=K04465+%23FFFFFF,red%0d%0aK04723+%23FFFFFF,green%0d%0aK04412+%23FFFFFF,green%0d%0aK04379+%23FFFFFF,red%0d%0aK04391+%23FFFFFF,red%0d%0a
BP	GO:0031953	negative regulation of protein autophosphorylation	1	1	2	8	ENSBGRG00000026091(MVP)	ENSBGRG00000021648(ENPP1)	0.00775259	0.270112		ko04710	Circadian rhythm	Organismal Systems	Environmental adaptation	0	1	1	31	0.391922	0.85932	-	ENSBGRG00000021547(FBXL3)	http://www.kegg.jp/kegg-bin/show_pathway?map=map04710&multi_query=K10269+%23FFFFFF,green%0d%0a
BP	GO:0051255	spindle midzone assembly	2	0	2	8	ENSBGRG00000007157(CCDC69),ENSBGRG00000008356(KIF4A)	-	0.00775259	0.270112		ko05235	PD-L1 expression and PD-1 checkpoint pathway in cancer	Human Diseases	Cancer: overview	1	1	2	85	0.392565	0.85932	ENSBGRG00000009096(FOS)	ENSBGRG00000017549(TLR2)	http://www.kegg.jp/kegg-bin/show_pathway?map=map05235&multi_query=K10159+%23FFFFFF,green%0d%0aK04379+%23FFFFFF,red%0d%0a
BP	GO:0086014	atrial cardiac muscle cell action potential	0	2	2	8	-	ENSBGRG00000011476(KCNN2),ENSBGRG00000012965(SCN3B)	0.00775259	0.270112		ko03030	DNA replication	Genetic Information Processing	Replication and repair	0	1	1	32	0.401623	0.85932	-	ENSBGRG00000003542(PRIM1)	http://www.kegg.jp/kegg-bin/show_pathway?map=map03030&multi_query=K02684+%23FFFFFF,green%0d%0a
BP	GO:0086026	atrial cardiac muscle cell to AV node cell signaling	0	2	2	8	-	ENSBGRG00000011476(KCNN2),ENSBGRG00000012965(SCN3B)	0.00775259	0.270112		ko04621	NOD-like receptor signaling pathway	Organismal Systems	Immune system	0	3	3	145	0.406292	0.85932	-	ENSBGRG00000007410(NAMPT),ENSBGRG00000020251,ENSBGRG00000007270(NLRC4)	http://www.kegg.jp/kegg-bin/show_pathway?map=map04621&multi_query=K14624+%23FFFFFF,green%0d%0aK03462+%23FFFFFF,green%0d%0aK12805+%23FFFFFF,green%0d%0a
BP	GO:0086066	atrial cardiac muscle cell to AV node cell communication	0	2	2	8	-	ENSBGRG00000011476(KCNN2),ENSBGRG00000012965(SCN3B)	0.00775259	0.270112		ko00250	Alanine, aspartate and glutamate metabolism	Metabolism	Amino acid metabolism	1	0	1	33	0.411171	0.85932	ENSBGRG00000003404(ALDH4A1)	-	http://www.kegg.jp/kegg-bin/show_pathway?map=map00250&multi_query=K00294+%23FFFFFF,red%0d%0a
BP	GO:0044283	small molecule biosynthetic process	10	4	14	393	ENSBGRG00000002916(GPD1),ENSBGRG00000012849(SLC45A3),ENSBGRG00000014023(ADA),ENSBGRG00000014778(PGK1),ENSBGRG00000015533(GAMT),ENSBGRG00000021836(TPI1),ENSBGRG00000022167(GPI),ENSBGRG00000025536(PLOD3),ENSBGRG00000026159(NME3),ENSBGRG00000026875(ACSF3)	ENSBGRG00000011219(LHCGR),ENSBGRG00000012579(FOXO1),ENSBGRG00000014262(PPARGC1A),ENSBGRG00000021648(ENPP1)	0.00838135	0.270112		ko04151	PI3K-Akt signaling pathway	Environmental Information Processing	Signal transduction	5	1	6	326	0.416273	0.85932	ENSBGRG00000005083(COL4A2),ENSBGRG00000004437(COL4A1),ENSBGRG00000007226,ENSBGRG00000000523(NR4A1),ENSBGRG00000021195(LAMA5)	ENSBGRG00000017549(TLR2)	http://www.kegg.jp/kegg-bin/show_pathway?map=map04151&multi_query=K06240+%23FFFFFF,red%0d%0aK06237+%23FFFFFF,red%0d%0aK04737+%23FFFFFF,red%0d%0aK04465+%23FFFFFF,red%0d%0aK10159+%23FFFFFF,green%0d%0a
BP	GO:0071704	organic substance metabolic process	103	51	154	7873	ENSBGRG00000000257(SLX9),ENSBGRG00000000313(CCN1),ENSBGRG00000000523(NR4A1),ENSBGRG00000001124(PPOX),ENSBGRG00000001755,ENSBGRG00000001765(DIP2A),ENSBGRG00000002161(POMGNT1),ENSBGRG00000002480(SOX7),ENSBGRG00000002593(ATP13A2),ENSBGRG00000002916(GPD1),ENSBGRG00000003335(HECTD3),ENSBGRG00000003404(ALDH4A1),ENSBGRG00000003703(CENPE),ENSBGRG00000003738(CC2D1B),ENSBGRG00000004287(PPM1J),ENSBGRG000000…	ENSBGRG00000001029(GTF3C3),ENSBGRG00000001610(GABPB2),ENSBGRG00000002918(PFDN5),ENSBGRG00000003232(LRIF1),ENSBGRG00000003528(WDR75),ENSBGRG00000003542(PRIM1),ENSBGRG00000003576(KLB),ENSBGRG00000003633(TF),ENSBGRG00000004102(STK3),ENSBGRG00000005859(TADA1),ENSBGRG00000006896(TRIP13),ENSBGRG00000007139(KLHL15),ENSBGRG00000007270(NLRC4),ENSBGRG00000007410(NAMPT),ENSBGRG00000007957(PLCH1),ENSBGRG0000…	0.00854064	0.270112		ko03015	mRNA surveillance pathway	Genetic Information Processing	Translation	1	1	2	90	0.420454	0.85932	ENSBGRG00000014538(PABPC1L)	ENSBGRG00000017836(CSTF3)	http://www.kegg.jp/kegg-bin/show_pathway?map=map03015&multi_query=K13126+%23FFFFFF,red%0d%0aK14408+%23FFFFFF,green%0d%0a
BP	GO:0061337	cardiac conduction	2	2	4	47	ENSBGRG00000004337(KCNH2),ENSBGRG00000022985(SCN4B)	ENSBGRG00000011476(KCNN2),ENSBGRG00000012965(SCN3B)	0.0086258	0.270112		ko00512	Mucin type O-glycan biosynthesis	Metabolism	Glycan biosynthesis and metabolism	0	1	1	34	0.420568	0.85932	-	ENSBGRG00000019923(GCNT1)	http://www.kegg.jp/kegg-bin/show_pathway?map=map00512&multi_query=K00727+%23FFFFFF,green%0d%0a
BP	GO:0035295	tube development	18	4	22	738	ENSBGRG00000000313(CCN1),ENSBGRG00000000523(NR4A1),ENSBGRG00000004437(COL4A1),ENSBGRG00000005083(COL4A2),ENSBGRG00000011484(SFRP1),ENSBGRG00000013574(PKM),ENSBGRG00000014023(ADA),ENSBGRG00000014778(PGK1),ENSBGRG00000015317(MCAM),ENSBGRG00000017288(ADGRG1),ENSBGRG00000017664(PRKD2),ENSBGRG00000017761(PXDN),ENSBGRG00000021195(LAMA5),ENSBGRG00000021840(OSR1),ENSBGRG00000021903(ROBO4),ENSBGRG00000024…	ENSBGRG00000004102(STK3),ENSBGRG00000011219(LHCGR),ENSBGRG00000012363(SDC4),ENSBGRG00000016750(TIPARP)	0.008823	0.270112		ko05310	Asthma	Human Diseases	Immune disease	1	0	1	34	0.420568	0.85932	ENSBGRG00000019125	-	http://www.kegg.jp/kegg-bin/show_pathway?map=map05310&multi_query=K06752+%23FFFFFF,red%0d%0a
BP	GO:0009145	purine nucleoside triphosphate biosynthetic process	3	1	4	48	ENSBGRG00000001755,ENSBGRG00000012014(ENO1),ENSBGRG00000026159(NME3)	ENSBGRG00000014262(PPARGC1A)	0.00928528	0.270112		ko05340	Primary immunodeficiency	Human Diseases	Immune disease	1	0	1	35	0.429816	0.85932	ENSBGRG00000014023(ADA)	-	http://www.kegg.jp/kegg-bin/show_pathway?map=map05340&multi_query=K01488+%23FFFFFF,red%0d%0a
BP	GO:0009206	purine ribonucleoside triphosphate biosynthetic process	3	1	4	48	ENSBGRG00000001755,ENSBGRG00000012014(ENO1),ENSBGRG00000026159(NME3)	ENSBGRG00000014262(PPARGC1A)	0.00928528	0.270112		ko05219	Bladder cancer	Human Diseases	Cancer: specific types	0	1	1	35	0.429816	0.85932	-	ENSBGRG00000012778(CDH1)	http://www.kegg.jp/kegg-bin/show_pathway?map=map05219&multi_query=K05689+%23FFFFFF,green%0d%0a
BP	GO:0030810	positive regulation of nucleotide biosynthetic process	1	1	2	9	ENSBGRG00000012014(ENO1)	ENSBGRG00000014262(PPARGC1A)	0.00985486	0.270112		ko04658	Th1 and Th2 cell differentiation	Organismal Systems	Immune system	2	0	2	93	0.436877	0.85932	ENSBGRG00000019125,ENSBGRG00000009096(FOS)	-	http://www.kegg.jp/kegg-bin/show_pathway?map=map04658&multi_query=K06752+%23FFFFFF,red%0d%0aK04379+%23FFFFFF,red%0d%0a
BP	GO:0038063	collagen-activated tyrosine kinase receptor signaling pathway	2	0	2	9	ENSBGRG00000004437(COL4A1),ENSBGRG00000005083(COL4A2)	-	0.00985486	0.270112		ko05216	Thyroid cancer	Human Diseases	Cancer: specific types	0	1	1	36	0.438917	0.85932	-	ENSBGRG00000012778(CDH1)	http://www.kegg.jp/kegg-bin/show_pathway?map=map05216&multi_query=K05689+%23FFFFFF,green%0d%0a
BP	GO:0086012	membrane depolarization during cardiac muscle cell action potential	1	1	2	9	ENSBGRG00000022985(SCN4B)	ENSBGRG00000012965(SCN3B)	0.00985486	0.270112		ko04725	Cholinergic synapse	Organismal Systems	Nervous system	2	0	2	94	0.442297	0.85932	ENSBGRG00000009096(FOS),ENSBGRG00000016298(KCNQ4)	-	http://www.kegg.jp/kegg-bin/show_pathway?map=map04725&multi_query=K04379+%23FFFFFF,red%0d%0aK04929+%23FFFFFF,red%0d%0a
BP	GO:1900373	positive regulation of purine nucleotide biosynthetic process	1	1	2	9	ENSBGRG00000012014(ENO1)	ENSBGRG00000014262(PPARGC1A)	0.00985486	0.270112		ko04726	Serotonergic synapse	Organismal Systems	Nervous system	1	1	2	95	0.447688	0.85932	ENSBGRG00000010949(CYP2D6)	ENSBGRG00000011476(KCNN2)	http://www.kegg.jp/kegg-bin/show_pathway?map=map04726&multi_query=K04943+%23FFFFFF,green%0d%0aK07414+%23FFFFFF,red%0d%0a
BP	GO:0055086	nucleobase-containing small molecule metabolic process	10	3	13	362	ENSBGRG00000001755,ENSBGRG00000002916(GPD1),ENSBGRG00000012014(ENO1),ENSBGRG00000013574(PKM),ENSBGRG00000014023(ADA),ENSBGRG00000014778(PGK1),ENSBGRG00000019722,ENSBGRG00000021836(TPI1),ENSBGRG00000022167(GPI),ENSBGRG00000026159(NME3)	ENSBGRG00000007410(NAMPT),ENSBGRG00000014262(PPARGC1A),ENSBGRG00000021648(ENPP1)	0.0102277	0.270112		ko03022	Basal transcription factors	Genetic Information Processing	Transcription	0	1	1	37	0.447875	0.85932	-	ENSBGRG00000013181(TAF9)	http://www.kegg.jp/kegg-bin/show_pathway?map=map03022&multi_query=K14535+%23FFFFFF,green%0d%0a
BP	GO:0007548	sex differentiation	5	3	8	173	ENSBGRG00000011484(SFRP1),ENSBGRG00000017288(ADGRG1),ENSBGRG00000020110(AXL),ENSBGRG00000020214(CBX2),ENSBGRG00000021840(OSR1)	ENSBGRG00000011219(LHCGR),ENSBGRG00000016750(TIPARP),ENSBGRG00000025786(ARID5B)	0.0103466	0.270112		ko04930	Type II diabetes mellitus	Human Diseases	Endocrine and metabolic disease	1	0	1	39	0.465367	0.85932	ENSBGRG00000013574(PKM)	-	http://www.kegg.jp/kegg-bin/show_pathway?map=map04930&multi_query=K00873+%23FFFFFF,red%0d%0a
BP	GO:0009267	cellular response to starvation	5	1	6	107	ENSBGRG00000001080(ELAPOR1),ENSBGRG00000008094(KLF10),ENSBGRG00000009666(PIK3C2B),ENSBGRG00000011484(SFRP1),ENSBGRG00000013936(MYBBP1A)	ENSBGRG00000012579(FOXO1)	0.0105397	0.270112		ko04360	Axon guidance	Organismal Systems	Development and regeneration	3	0	3	161	0.473563	0.85932	ENSBGRG00000024327(PLXNA2),ENSBGRG00000007703(SRGAP3),ENSBGRG00000026122(SLIT1)	-	http://www.kegg.jp/kegg-bin/show_pathway?map=map04360&multi_query=K06838+%23FFFFFF,red%0d%0aK07526+%23FFFFFF,red%0d%0aK06820+%23FFFFFF,red%0d%0a
BP	GO:0070252	actin-mediated cell contraction	2	2	4	50	ENSBGRG00000004337(KCNH2),ENSBGRG00000022985(SCN4B)	ENSBGRG00000011476(KCNN2),ENSBGRG00000012965(SCN3B)	0.0107008	0.270112		ko04668	TNF signaling pathway	Environmental Information Processing	Signal transduction	1	1	2	101	0.479413	0.85932	ENSBGRG00000009096(FOS)	ENSBGRG00000020251	http://www.kegg.jp/kegg-bin/show_pathway?map=map04668&multi_query=K14624+%23FFFFFF,green%0d%0aK04379+%23FFFFFF,red%0d%0a
BP	GO:0001525	angiogenesis	12	0	12	325	ENSBGRG00000000313(CCN1),ENSBGRG00000000523(NR4A1),ENSBGRG00000004437(COL4A1),ENSBGRG00000005083(COL4A2),ENSBGRG00000013574(PKM),ENSBGRG00000014778(PGK1),ENSBGRG00000015317(MCAM),ENSBGRG00000017288(ADGRG1),ENSBGRG00000017664(PRKD2),ENSBGRG00000017761(PXDN),ENSBGRG00000021903(ROBO4),ENSBGRG00000025096(ANGPTL4)	-	0.0109121	0.270112		ko04144	Endocytosis	Cellular Processes	Transport and catabolism	4	0	4	225	0.482185	0.85932	ENSBGRG00000013842(ACAP3),ENSBGRG00000012956(PSD3),ENSBGRG00000020812,ENSBGRG00000017840(ARF6)	-	http://www.kegg.jp/kegg-bin/show_pathway?map=map04144&multi_query=K07941+%23FFFFFF,red%0d%0aK06751+%23FFFFFF,red%0d%0aK12489+%23FFFFFF,red%0d%0aK12494+%23FFFFFF,red%0d%0a
BP	GO:0002021	response to dietary excess	1	2	3	27	ENSBGRG00000008276(SLC25A25)	ENSBGRG00000009051(ACVR1C),ENSBGRG00000014262(PPARGC1A)	0.0109323	0.270112		ko05167	Kaposi sarcoma-associated herpesvirus infection	Human Diseases	Infectious disease: viral	3	0	3	164	0.485811	0.85932	ENSBGRG00000009096(FOS),ENSBGRG00000000821,ENSBGRG00000020812	-	http://www.kegg.jp/kegg-bin/show_pathway?map=map05167&multi_query=K04379+%23FFFFFF,red%0d%0aK06751+%23FFFFFF,red%0d%0aK21668+%23FFFFFF,red%0d%0a
BP	GO:0086065	cell communication involved in cardiac conduction	1	2	3	27	ENSBGRG00000022985(SCN4B)	ENSBGRG00000011476(KCNN2),ENSBGRG00000012965(SCN3B)	0.0109323	0.270112		ko04650	Natural killer cell mediated cytotoxicity	Organismal Systems	Immune system	1	1	2	103	0.489743	0.85932	ENSBGRG00000020812	ENSBGRG00000015947	http://www.kegg.jp/kegg-bin/show_pathway?map=map04650&multi_query=K07986+%23FFFFFF,green%0d%0aK06751+%23FFFFFF,red%0d%0a
BP	GO:1902305	regulation of sodium ion transmembrane transport	2	1	3	27	ENSBGRG00000021840(OSR1),ENSBGRG00000022985(SCN4B)	ENSBGRG00000012965(SCN3B)	0.0109323	0.270112		ko04975	Fat digestion and absorption	Organismal Systems	Digestive system	1	0	1	42	0.49058	0.85932	ENSBGRG00000025244(SLC27A1)	-	http://www.kegg.jp/kegg-bin/show_pathway?map=map04975&multi_query=K08745+%23FFFFFF,red%0d%0a
BP	GO:1901135	carbohydrate derivative metabolic process	16	4	20	669	ENSBGRG00000001755,ENSBGRG00000002161(POMGNT1),ENSBGRG00000002916(GPD1),ENSBGRG00000005603(TMEM106A),ENSBGRG00000006039(XYLT2),ENSBGRG00000008937(EXTL1),ENSBGRG00000012014(ENO1),ENSBGRG00000012134(PIGL),ENSBGRG00000013574(PKM),ENSBGRG00000014023(ADA),ENSBGRG00000014778(PGK1),ENSBGRG00000019794(CANT1),ENSBGRG00000021836(TPI1),ENSBGRG00000022167(GPI),ENSBGRG00000025536(PLOD3),ENSBGRG00000026159(NME…	ENSBGRG00000014262(PPARGC1A),ENSBGRG00000019923(GCNT1),ENSBGRG00000020997(GLCE),ENSBGRG00000021648(ENPP1)	0.0119501	0.270112		ko04913	Ovarian steroidogenesis	Organismal Systems	Endocrine system	0	1	1	42	0.49058	0.85932	-	ENSBGRG00000011219(LHCGR)	http://www.kegg.jp/kegg-bin/show_pathway?map=map04913&multi_query=K04248+%23FFFFFF,green%0d%0a
BP	GO:0007520	myoblast fusion	3	0	3	28	ENSBGRG00000017135(PLEKHO1),ENSBGRG00000022747(DYRK1B),ENSBGRG00000026269(MYOG)	-	0.0120908	0.270112		ko00140	Steroid hormone biosynthesis	Metabolism	Lipid metabolism	1	0	1	44	0.50673	0.85932	ENSBGRG00000010949(CYP2D6)	-	http://www.kegg.jp/kegg-bin/show_pathway?map=map00140&multi_query=K07414+%23FFFFFF,red%0d%0a
BP	GO:0014029	neural crest formation	2	0	2	10	ENSBGRG00000011484(SFRP1),ENSBGRG00000022016(TCOF1)	-	0.0121794	0.270112		ko04979	Cholesterol metabolism	Organismal Systems	Digestive system	1	0	1	44	0.50673	0.85932	ENSBGRG00000025096(ANGPTL4)	-	http://www.kegg.jp/kegg-bin/show_pathway?map=map04979&multi_query=K08767+%23FFFFFF,red%0d%0a
BP	GO:0071380	cellular response to prostaglandin E stimulus	2	0	2	10	ENSBGRG00000007264(TNFSF4),ENSBGRG00000011484(SFRP1)	-	0.0121794	0.270112		ko00514	Other types of O-glycan biosynthesis	Metabolism	Glycan biosynthesis and metabolism	1	0	1	44	0.50673	0.85932	ENSBGRG00000025536(PLOD3)	-	http://www.kegg.jp/kegg-bin/show_pathway?map=map00514&multi_query=K13646+%23FFFFFF,red%0d%0a
BP	GO:1902043	positive regulation of extrinsic apoptotic signaling pathway via death domain receptors	1	1	2	10	ENSBGRG00000011484(SFRP1)	ENSBGRG00000004102(STK3)	0.0121794	0.270112		ko04370	VEGF signaling pathway	Environmental Information Processing	Signal transduction	1	0	1	44	0.50673	0.85932	ENSBGRG00000026252(PXN)	-	http://www.kegg.jp/kegg-bin/show_pathway?map=map04370&multi_query=K05760+%23FFFFFF,red%0d%0a
BP	GO:1903543	positive regulation of exosomal secretion	1	1	2	10	ENSBGRG00000002593(ATP13A2)	ENSBGRG00000012363(SDC4)	0.0121794	0.270112		ko00260	Glycine, serine and threonine metabolism	Metabolism	Amino acid metabolism	1	0	1	45	0.514613	0.85932	ENSBGRG00000015533(GAMT)	-	http://www.kegg.jp/kegg-bin/show_pathway?map=map00260&multi_query=K00542+%23FFFFFF,red%0d%0a
BP	GO:0009201	ribonucleoside triphosphate biosynthetic process	3	1	4	52	ENSBGRG00000001755,ENSBGRG00000012014(ENO1),ENSBGRG00000026159(NME3)	ENSBGRG00000014262(PPARGC1A)	0.0122487	0.270112		ko05030	Cocaine addiction	Human Diseases	Substance dependence	1	0	1	45	0.514613	0.85932	ENSBGRG00000024972(GPSM1)	-	http://www.kegg.jp/kegg-bin/show_pathway?map=map05030&multi_query=K15839+%23FFFFFF,red%0d%0a
BP	GO:0060395	SMAD protein signal transduction	2	2	4	52	ENSBGRG00000009096(FOS),ENSBGRG00000025584(CILP)	ENSBGRG00000003633(TF),ENSBGRG00000008695(PBLD)	0.0122487	0.270112		ko05130	Pathogenic Escherichia coli infection	Human Diseases	Infectious disease: bacterial	2	1	3	173	0.521721	0.85932	ENSBGRG00000009096(FOS),ENSBGRG00000017840(ARF6)	ENSBGRG00000014062(ABI1)	http://www.kegg.jp/kegg-bin/show_pathway?map=map05130&multi_query=K23649+%23FFFFFF,green%0d%0aK04379+%23FFFFFF,red%0d%0aK07941+%23FFFFFF,red%0d%0a
BP	GO:0007166	cell surface receptor signaling pathway	27	13	40	1622	ENSBGRG00000000313(CCN1),ENSBGRG00000002480(SOX7),ENSBGRG00000004437(COL4A1),ENSBGRG00000005083(COL4A2),ENSBGRG00000007004(NKD2),ENSBGRG00000007368(FAM53B),ENSBGRG00000007584(PRAG1),ENSBGRG00000008036(DTX2),ENSBGRG00000009080(PYGO2),ENSBGRG00000009096(FOS),ENSBGRG00000011023(TMEM88),ENSBGRG00000011484(SFRP1),ENSBGRG00000014023(ADA),ENSBGRG00000015838(TMC8),ENSBGRG00000015957(GLIS2),ENSBGRG0000001…	ENSBGRG00000002918(PFDN5),ENSBGRG00000003576(KLB),ENSBGRG00000003633(TF),ENSBGRG00000004102(STK3),ENSBGRG00000008695(PBLD),ENSBGRG00000008888(CDH17),ENSBGRG00000009051(ACVR1C),ENSBGRG00000015073(ADGRL3),ENSBGRG00000015268(PTPRK),ENSBGRG00000016750(TIPARP),ENSBGRG00000017549(TLR2),ENSBGRG00000021648(ENPP1),ENSBGRG00000025786(ARID5B)	0.012333	0.270112		ko02010	ABC transporters	Environmental Information Processing	Membrane transport	1	0	1	46	0.522372	0.85932	ENSBGRG00000012998(ABCC10)	-	http://www.kegg.jp/kegg-bin/show_pathway?map=map02010&multi_query=K05674+%23FFFFFF,red%0d%0a
BP	GO:0035282	segmentation	4	1	5	80	ENSBGRG00000011484(SFRP1),ENSBGRG00000021195(LAMA5),ENSBGRG00000021840(OSR1),ENSBGRG00000024327(PLXNA2)	ENSBGRG00000014062(ABI1)	0.0123594	0.270112		ko00380	Tryptophan metabolism	Metabolism	Amino acid metabolism	1	0	1	46	0.522372	0.85932	ENSBGRG00000026145(ALDH2)	-	http://www.kegg.jp/kegg-bin/show_pathway?map=map00380&multi_query=K00128+%23FFFFFF,red%0d%0a
BP	GO:0045137	development of primary sexual characteristics	4	3	7	145	ENSBGRG00000011484(SFRP1),ENSBGRG00000017288(ADGRG1),ENSBGRG00000020214(CBX2),ENSBGRG00000021840(OSR1)	ENSBGRG00000011219(LHCGR),ENSBGRG00000016750(TIPARP),ENSBGRG00000025786(ARID5B)	0.0129091	0.270112		ko05168	Herpes simplex virus 1 infection	Human Diseases	Infectious disease: viral	2	3	5	301	0.52452	0.85932	ENSBGRG00000020812,ENSBGRG00000019125	ENSBGRG00000017549(TLR2),ENSBGRG00000017666(ZNF527),ENSBGRG00000020251	http://www.kegg.jp/kegg-bin/show_pathway?map=map05168&multi_query=K14624+%23FFFFFF,green%0d%0aK10159+%23FFFFFF,green%0d%0aK06752+%23FFFFFF,red%0d%0aK06751+%23FFFFFF,red%0d%0aK09228+%23FFFFFF,green%0d%0a
BP	GO:0048511	rhythmic process	3	4	7	145	ENSBGRG00000008094(KLF10),ENSBGRG00000020110(AXL),ENSBGRG00000024506(NR2F6)	ENSBGRG00000007410(NAMPT),ENSBGRG00000011219(LHCGR),ENSBGRG00000014262(PPARGC1A),ENSBGRG00000021547(FBXL3)	0.0129091	0.270112		ko04214	Apoptosis - fly	Cellular Processes	Cell growth and death	0	1	1	47	0.530008	0.85932	-	ENSBGRG00000004102(STK3)	http://www.kegg.jp/kegg-bin/show_pathway?map=map04214&multi_query=K04412+%23FFFFFF,green%0d%0a
BP	GO:0061448	connective tissue development	6	2	8	180	ENSBGRG00000000313(CCN1),ENSBGRG00000008276(SLC25A25),ENSBGRG00000009629(BMP1),ENSBGRG00000021840(OSR1),ENSBGRG00000022747(DYRK1B),ENSBGRG00000022881(SERPINH1)	ENSBGRG00000014262(PPARGC1A),ENSBGRG00000025786(ARID5B)	0.0129224	0.270112		ko04216	Ferroptosis	Cellular Processes	Cell growth and death	0	1	1	47	0.530008	0.85932	-	ENSBGRG00000003633(TF)	http://www.kegg.jp/kegg-bin/show_pathway?map=map04216&multi_query=K14736+%23FFFFFF,green%0d%0a
BP	GO:0035239	tube morphogenesis	15	3	18	588	ENSBGRG00000000313(CCN1),ENSBGRG00000000523(NR4A1),ENSBGRG00000004437(COL4A1),ENSBGRG00000005083(COL4A2),ENSBGRG00000011484(SFRP1),ENSBGRG00000013574(PKM),ENSBGRG00000014778(PGK1),ENSBGRG00000015317(MCAM),ENSBGRG00000017288(ADGRG1),ENSBGRG00000017664(PRKD2),ENSBGRG00000017761(PXDN),ENSBGRG00000021195(LAMA5),ENSBGRG00000021840(OSR1),ENSBGRG00000021903(ROBO4),ENSBGRG00000025096(ANGPTL4)	ENSBGRG00000004102(STK3),ENSBGRG00000012363(SDC4),ENSBGRG00000016750(TIPARP)	0.0134202	0.270112		ko00520	Amino sugar and nucleotide sugar metabolism	Metabolism	Carbohydrate metabolism	1	0	1	47	0.530008	0.85932	ENSBGRG00000022167(GPI)	-	http://www.kegg.jp/kegg-bin/show_pathway?map=map00520&multi_query=K01810+%23FFFFFF,red%0d%0a
BP	GO:0042594	response to starvation	5	1	6	113	ENSBGRG00000001080(ELAPOR1),ENSBGRG00000008094(KLF10),ENSBGRG00000009666(PIK3C2B),ENSBGRG00000011484(SFRP1),ENSBGRG00000013936(MYBBP1A)	ENSBGRG00000012579(FOXO1)	0.013541	0.270112		ko00270	Cysteine and methionine metabolism	Metabolism	Amino acid metabolism	0	1	1	48	0.537522	0.85932	-	ENSBGRG00000010694(AMD1)	http://www.kegg.jp/kegg-bin/show_pathway?map=map00270&multi_query=K01611+%23FFFFFF,green%0d%0a
BP	GO:2000145	regulation of cell motility	12	7	19	633	ENSBGRG00000000313(CCN1),ENSBGRG00000003011(PODN),ENSBGRG00000005949(ARHGEF39),ENSBGRG00000006266(S100A14),ENSBGRG00000011484(SFRP1),ENSBGRG00000014023(ADA),ENSBGRG00000017288(ADGRG1),ENSBGRG00000017664(PRKD2),ENSBGRG00000017840(ARF6),ENSBGRG00000021195(LAMA5),ENSBGRG00000022167(GPI),ENSBGRG00000024327(PLXNA2)	ENSBGRG00000003633(TF),ENSBGRG00000009051(ACVR1C),ENSBGRG00000012363(SDC4),ENSBGRG00000012778(CDH1),ENSBGRG00000015268(PTPRK),ENSBGRG00000019923(GCNT1),ENSBGRG00000020150(ULK4)	0.0135905	0.270112		ko05205	Proteoglycans in cancer	Human Diseases	Cancer: overview	1	2	3	179	0.544905	0.85932	ENSBGRG00000026252(PXN)	ENSBGRG00000012363(SDC4),ENSBGRG00000017549(TLR2)	http://www.kegg.jp/kegg-bin/show_pathway?map=map05205&multi_query=K05760+%23FFFFFF,red%0d%0aK16338+%23FFFFFF,green%0d%0aK10159+%23FFFFFF,green%0d%0a
BP	GO:0072659	protein localization to plasma membrane	6	2	8	183	ENSBGRG00000005972(PALM),ENSBGRG00000007004(NKD2),ENSBGRG00000010087(NSG1),ENSBGRG00000011023(TMEM88),ENSBGRG00000017840(ARF6),ENSBGRG00000021195(LAMA5)	ENSBGRG00000012778(CDH1),ENSBGRG00000012965(SCN3B)	0.0141594	0.270112		ko04210	Apoptosis	Cellular Processes	Cell growth and death	2	0	2	116	0.55369	0.85932	ENSBGRG00000007226,ENSBGRG00000009096(FOS)	-	http://www.kegg.jp/kegg-bin/show_pathway?map=map04210&multi_query=K04379+%23FFFFFF,red%0d%0aK04737+%23FFFFFF,red%0d%0a
BP	GO:0019637	organophosphate metabolic process	14	5	19	638	ENSBGRG00000001755,ENSBGRG00000002916(GPD1),ENSBGRG00000005144(MOCS3),ENSBGRG00000009666(PIK3C2B),ENSBGRG00000012014(ENO1),ENSBGRG00000012134(PIGL),ENSBGRG00000013574(PKM),ENSBGRG00000014023(ADA),ENSBGRG00000014778(PGK1),ENSBGRG00000019722,ENSBGRG00000021836(TPI1),ENSBGRG00000022167(GPI),ENSBGRG00000025244(SLC27A1),ENSBGRG00000026159(NME3)	ENSBGRG00000007410(NAMPT),ENSBGRG00000009254(PIK3C2A),ENSBGRG00000011219(LHCGR),ENSBGRG00000014262(PPARGC1A),ENSBGRG00000021648(ENPP1)	0.0146575	0.270112		ko05213	Endometrial cancer	Human Diseases	Cancer: specific types	0	1	1	51	0.559359	0.85932	-	ENSBGRG00000012778(CDH1)	http://www.kegg.jp/kegg-bin/show_pathway?map=map05213&multi_query=K05689+%23FFFFFF,green%0d%0a
BP	GO:0016045	detection of bacterium	0	2	2	11	-	ENSBGRG00000007270(NLRC4),ENSBGRG00000017549(TLR2)	0.0147181	0.270112		ko05202	Transcriptional misregulation in cancer	Human Diseases	Cancer: overview	2	1	3	183	0.560001	0.85932	ENSBGRG00000018040(CD14),ENSBGRG00000012849(SLC45A3)	ENSBGRG00000012579(FOXO1)	http://www.kegg.jp/kegg-bin/show_pathway?map=map05202&multi_query=K04391+%23FFFFFF,red%0d%0aK15379+%23FFFFFF,red%0d%0aK07201+%23FFFFFF,green%0d%0a
BP	GO:0030202	heparin metabolic process	1	1	2	11	ENSBGRG00000006039(XYLT2)	ENSBGRG00000020997(GLCE)	0.0147181	0.270112		ko04340	Hedgehog signaling pathway	Environmental Information Processing	Signal transduction	1	0	1	52	0.566408	0.85932	ENSBGRG00000018363	-	http://www.kegg.jp/kegg-bin/show_pathway?map=map04340&multi_query=K23664+%23FFFFFF,red%0d%0a
BP	GO:0050862	positive regulation of T cell receptor signaling pathway	2	0	2	11	ENSBGRG00000014023(ADA),ENSBGRG00000017664(PRKD2)	-	0.0147181	0.270112		ko04213	Longevity regulating pathway - multiple species	Organismal Systems	Aging	0	1	1	52	0.566408	0.85932	-	ENSBGRG00000012579(FOXO1)	http://www.kegg.jp/kegg-bin/show_pathway?map=map04213&multi_query=K07201+%23FFFFFF,green%0d%0a
BP	GO:0071379	cellular response to prostaglandin stimulus	2	0	2	11	ENSBGRG00000007264(TNFSF4),ENSBGRG00000011484(SFRP1)	-	0.0147181	0.270112		ko04915	Estrogen signaling pathway	Organismal Systems	Endocrine system	1	1	2	120	0.572211	0.85932	ENSBGRG00000009096(FOS)	ENSBGRG00000014981(FKBP5)	http://www.kegg.jp/kegg-bin/show_pathway?map=map04915&multi_query=K09571+%23FFFFFF,green%0d%0aK04379+%23FFFFFF,red%0d%0a
BP	GO:0086013	membrane repolarization during cardiac muscle cell action potential	1	1	2	11	ENSBGRG00000004337(KCNH2)	ENSBGRG00000011476(KCNN2)	0.0147181	0.270112		ko04080	Neuroactive ligand-receptor interaction	Environmental Information Processing	Signaling molecules and interaction	3	2	5	318	0.574052	0.85932	ENSBGRG00000003965,ENSBGRG00000004297(LYNX1),ENSBGRG00000009343(MCHR1)	ENSBGRG00000011219(LHCGR),ENSBGRG00000014410(P2RY14)	http://www.kegg.jp/kegg-bin/show_pathway?map=map04080&multi_query=K25369+%23FFFFFF,red%0d%0aK04320+%23FFFFFF,red%0d%0aK04299+%23FFFFFF,green%0d%0aK05240+%23FFFFFF,red%0d%0aK04248+%23FFFFFF,green%0d%0a
BP	GO:0097284	hepatocyte apoptotic process	1	1	2	11	ENSBGRG00000017840(ARF6)	ENSBGRG00000004102(STK3)	0.0147181	0.270112		ko04672	Intestinal immune network for IgA production	Organismal Systems	Immune system	1	0	1	55	0.586892	0.85932	ENSBGRG00000019125	-	http://www.kegg.jp/kegg-bin/show_pathway?map=map04672&multi_query=K06752+%23FFFFFF,red%0d%0a
BP	GO:2001169	regulation of ATP biosynthetic process	1	1	2	11	ENSBGRG00000012014(ENO1)	ENSBGRG00000014262(PPARGC1A)	0.0147181	0.270112		ko04330	Notch signaling pathway	Environmental Information Processing	Signal transduction	1	0	1	55	0.586892	0.85932	ENSBGRG00000008036(DTX2)	-	http://www.kegg.jp/kegg-bin/show_pathway?map=map04330&multi_query=K06058+%23FFFFFF,red%0d%0a
BP	GO:0002027	regulation of heart rate	3	1	4	55	ENSBGRG00000004337(KCNH2),ENSBGRG00000014023(ADA),ENSBGRG00000022985(SCN4B)	ENSBGRG00000012965(SCN3B)	0.0148276	0.270112		ko04978	Mineral absorption	Organismal Systems	Digestive system	0	1	1	56	0.593505	0.85932	-	ENSBGRG00000003633(TF)	http://www.kegg.jp/kegg-bin/show_pathway?map=map04978&multi_query=K14736+%23FFFFFF,green%0d%0a
BP	GO:0046660	female sex differentiation	2	3	5	84	ENSBGRG00000011484(SFRP1),ENSBGRG00000020110(AXL)	ENSBGRG00000011219(LHCGR),ENSBGRG00000016750(TIPARP),ENSBGRG00000025786(ARID5B)	0.0150229	0.270112		ko05031	Amphetamine addiction	Human Diseases	Substance dependence	1	0	1	57	0.600012	0.85932	ENSBGRG00000009096(FOS)	-	http://www.kegg.jp/kegg-bin/show_pathway?map=map05031&multi_query=K04379+%23FFFFFF,red%0d%0a
BP	GO:0044281	small molecule metabolic process	23	7	30	1153	ENSBGRG00000001755,ENSBGRG00000002916(GPD1),ENSBGRG00000003404(ALDH4A1),ENSBGRG00000006039(XYLT2),ENSBGRG00000010949(CYP2D6),ENSBGRG00000012014(ENO1),ENSBGRG00000012849(SLC45A3),ENSBGRG00000012998(ABCC10),ENSBGRG00000013574(PKM),ENSBGRG00000014023(ADA),ENSBGRG00000014778(PGK1),ENSBGRG00000015533(GAMT),ENSBGRG00000017531(CRAT),ENSBGRG00000017727(ILVBL),ENSBGRG00000019059(BCKDHA),ENSBGRG00000019722…	ENSBGRG00000007410(NAMPT),ENSBGRG00000011219(LHCGR),ENSBGRG00000012579(FOXO1),ENSBGRG00000014262(PPARGC1A),ENSBGRG00000016397(CYP4V2),ENSBGRG00000020997(GLCE),ENSBGRG00000021648(ENPP1)	0.0152332	0.270112		ko04927	Cortisol synthesis and secretion	Organismal Systems	Endocrine system	1	0	1	57	0.600012	0.85932	ENSBGRG00000000523(NR4A1)	-	http://www.kegg.jp/kegg-bin/show_pathway?map=map04927&multi_query=K04465+%23FFFFFF,red%0d%0a
BP	GO:0072001	renal system development	6	3	9	223	ENSBGRG00000004437(COL4A1),ENSBGRG00000009080(PYGO2),ENSBGRG00000011484(SFRP1),ENSBGRG00000015957(GLIS2),ENSBGRG00000021195(LAMA5),ENSBGRG00000021840(OSR1)	ENSBGRG00000016750(TIPARP),ENSBGRG00000019923(GCNT1),ENSBGRG00000025786(ARID5B)	0.0154346	0.270112		ko05169	Epstein-Barr virus infection	Human Diseases	Infectious disease: viral	2	1	3	195	0.60346	0.85932	ENSBGRG00000020812,ENSBGRG00000019125	ENSBGRG00000017549(TLR2)	http://www.kegg.jp/kegg-bin/show_pathway?map=map05169&multi_query=K06751+%23FFFFFF,red%0d%0aK10159+%23FFFFFF,green%0d%0aK06752+%23FFFFFF,red%0d%0a
BP	GO:0048870	cell motility	20	8	28	1061	ENSBGRG00000000313(CCN1),ENSBGRG00000000523(NR4A1),ENSBGRG00000003011(PODN),ENSBGRG00000005949(ARHGEF39),ENSBGRG00000006266(S100A14),ENSBGRG00000007584(PRAG1),ENSBGRG00000011484(SFRP1),ENSBGRG00000013842(ACAP3),ENSBGRG00000014023(ADA),ENSBGRG00000017135(PLEKHO1),ENSBGRG00000017288(ADGRG1),ENSBGRG00000017664(PRKD2),ENSBGRG00000017840(ARF6),ENSBGRG00000020110(AXL),ENSBGRG00000021195(LAMA5),ENSBGRG0…	ENSBGRG00000003633(TF),ENSBGRG00000009051(ACVR1C),ENSBGRG00000012363(SDC4),ENSBGRG00000012778(CDH1),ENSBGRG00000015268(PTPRK),ENSBGRG00000019923(GCNT1),ENSBGRG00000020150(ULK4),ENSBGRG00000025786(ARID5B)	0.0159024	0.270112		ko05226	Gastric cancer	Human Diseases	Cancer: specific types	0	2	2	128	0.607579	0.85932	-	ENSBGRG00000008888(CDH17),ENSBGRG00000012778(CDH1)	http://www.kegg.jp/kegg-bin/show_pathway?map=map05226&multi_query=K06811+%23FFFFFF,green%0d%0aK05689+%23FFFFFF,green%0d%0a
BP	GO:0051674	localization of cell	20	8	28	1061	ENSBGRG00000000313(CCN1),ENSBGRG00000000523(NR4A1),ENSBGRG00000003011(PODN),ENSBGRG00000005949(ARHGEF39),ENSBGRG00000006266(S100A14),ENSBGRG00000007584(PRAG1),ENSBGRG00000011484(SFRP1),ENSBGRG00000013842(ACAP3),ENSBGRG00000014023(ADA),ENSBGRG00000017135(PLEKHO1),ENSBGRG00000017288(ADGRG1),ENSBGRG00000017664(PRKD2),ENSBGRG00000017840(ARF6),ENSBGRG00000020110(AXL),ENSBGRG00000021195(LAMA5),ENSBGRG0…	ENSBGRG00000003633(TF),ENSBGRG00000009051(ACVR1C),ENSBGRG00000012363(SDC4),ENSBGRG00000012778(CDH1),ENSBGRG00000015268(PTPRK),ENSBGRG00000019923(GCNT1),ENSBGRG00000020150(ULK4),ENSBGRG00000025786(ARID5B)	0.0159024	0.270112		ko05322	Systemic lupus erythematosus	Human Diseases	Immune disease	2	0	2	128	0.607579	0.85932	ENSBGRG00000019125,ENSBGRG00000016458	-	http://www.kegg.jp/kegg-bin/show_pathway?map=map05322&multi_query=K06752+%23FFFFFF,red%0d%0aK11252+%23FFFFFF,red%0d%0a
BP	GO:0010676	positive regulation of cellular carbohydrate metabolic process	1	2	3	31	ENSBGRG00000012849(SLC45A3)	ENSBGRG00000011219(LHCGR),ENSBGRG00000012579(FOXO1)	0.0159754	0.270112		ko04261	Adrenergic signaling in cardiomyocytes	Organismal Systems	Circulatory system	2	0	2	128	0.607579	0.85932	ENSBGRG00000022985(SCN4B),ENSBGRG00000013193(MYL3)	-	http://www.kegg.jp/kegg-bin/show_pathway?map=map04261&multi_query=K12749+%23FFFFFF,red%0d%0aK04848+%23FFFFFF,red%0d%0a
BP	GO:0030334	regulation of cell migration	12	6	18	600	ENSBGRG00000000313(CCN1),ENSBGRG00000003011(PODN),ENSBGRG00000005949(ARHGEF39),ENSBGRG00000006266(S100A14),ENSBGRG00000011484(SFRP1),ENSBGRG00000014023(ADA),ENSBGRG00000017288(ADGRG1),ENSBGRG00000017664(PRKD2),ENSBGRG00000017840(ARF6),ENSBGRG00000021195(LAMA5),ENSBGRG00000022167(GPI),ENSBGRG00000024327(PLXNA2)	ENSBGRG00000009051(ACVR1C),ENSBGRG00000012363(SDC4),ENSBGRG00000012778(CDH1),ENSBGRG00000015268(PTPRK),ENSBGRG00000019923(GCNT1),ENSBGRG00000020150(ULK4)	0.0161757	0.270112		ko00561	Glycerolipid metabolism	Metabolism	Lipid metabolism	1	0	1	59	0.612719	0.85932	ENSBGRG00000026145(ALDH2)	-	http://www.kegg.jp/kegg-bin/show_pathway?map=map00561&multi_query=K00128+%23FFFFFF,red%0d%0a
BP	GO:1901701	cellular response to oxygen-containing compound	13	5	18	601	ENSBGRG00000000523(NR4A1),ENSBGRG00000002916(GPD1),ENSBGRG00000004437(COL4A1),ENSBGRG00000005972(PALM),ENSBGRG00000007264(TNFSF4),ENSBGRG00000009096(FOS),ENSBGRG00000010087(NSG1),ENSBGRG00000011484(SFRP1),ENSBGRG00000018040(CD14),ENSBGRG00000020110(AXL),ENSBGRG00000021840(OSR1),ENSBGRG00000025244(SLC27A1),ENSBGRG00000026269(MYOG)	ENSBGRG00000011219(LHCGR),ENSBGRG00000012778(CDH1),ENSBGRG00000015268(PTPRK),ENSBGRG00000017549(TLR2),ENSBGRG00000021648(ENPP1)	0.016424	0.270112		ko05230	Central carbon metabolism in cancer	Human Diseases	Cancer: overview	1	0	1	59	0.612719	0.85932	ENSBGRG00000013574(PKM)	-	http://www.kegg.jp/kegg-bin/show_pathway?map=map05230&multi_query=K00873+%23FFFFFF,red%0d%0a
BP	GO:0009205	purine ribonucleoside triphosphate metabolic process	3	1	4	57	ENSBGRG00000001755,ENSBGRG00000012014(ENO1),ENSBGRG00000026159(NME3)	ENSBGRG00000014262(PPARGC1A)	0.0167236	0.270112		ko05221	Acute myeloid leukemia	Human Diseases	Cancer: specific types	1	0	1	60	0.618922	0.85932	ENSBGRG00000018040(CD14)	-	http://www.kegg.jp/kegg-bin/show_pathway?map=map05221&multi_query=K04391+%23FFFFFF,red%0d%0a
BP	GO:0000296	spermine transport	1	0	1	1	ENSBGRG00000002593(ATP13A2)	-	0.0172567	0.270112		ko04391	Hippo signaling pathway - fly	Environmental Information Processing	Signal transduction	0	1	1	60	0.618922	0.85932	-	ENSBGRG00000004102(STK3)	http://www.kegg.jp/kegg-bin/show_pathway?map=map04391&multi_query=K04412+%23FFFFFF,green%0d%0a
BP	GO:0001579	medium-chain fatty acid transport	1	0	1	1	ENSBGRG00000025244(SLC27A1)	-	0.0172567	0.270112		ko05171	Coronavirus disease - COVID-19	Human Diseases	Infectious disease: viral	1	3	4	268	0.621249	0.85932	ENSBGRG00000009096(FOS)	ENSBGRG00000016735,ENSBGRG00000017549(TLR2),ENSBGRG00000020251	http://www.kegg.jp/kegg-bin/show_pathway?map=map05171&multi_query=K04379+%23FFFFFF,red%0d%0aK14624+%23FFFFFF,green%0d%0aK10159+%23FFFFFF,green%0d%0aK02930+%23FFFFFF,green%0d%0a
BP	GO:0002041	intussusceptive angiogenesis	1	0	1	1	ENSBGRG00000000313(CCN1)	-	0.0172567	0.270112		ko04662	B cell receptor signaling pathway	Organismal Systems	Immune system	1	0	1	61	0.625026	0.85932	ENSBGRG00000009096(FOS)	-	http://www.kegg.jp/kegg-bin/show_pathway?map=map04662&multi_query=K04379+%23FFFFFF,red%0d%0a
BP	GO:0002143	tRNA wobble position uridine thiolation	1	0	1	1	ENSBGRG00000005144(MOCS3)	-	0.0172567	0.270112		ko00590	Arachidonic acid metabolism	Metabolism	Lipid metabolism	1	0	1	62	0.631033	0.85932	ENSBGRG00000008923(PTGES2)	-	http://www.kegg.jp/kegg-bin/show_pathway?map=map00590&multi_query=K05309+%23FFFFFF,red%0d%0a
BP	GO:0006116	NADH oxidation	1	0	1	1	ENSBGRG00000002916(GPD1)	-	0.0172567	0.270112		ko05162	Measles	Human Diseases	Infectious disease: viral	1	1	2	134	0.632636	0.85932	ENSBGRG00000009096(FOS)	ENSBGRG00000017549(TLR2)	http://www.kegg.jp/kegg-bin/show_pathway?map=map05162&multi_query=K04379+%23FFFFFF,red%0d%0aK10159+%23FFFFFF,green%0d%0a
BP	GO:0006127	glycerophosphate shuttle	1	0	1	1	ENSBGRG00000002916(GPD1)	-	0.0172567	0.270112		ko04218	Cellular senescence	Cellular Processes	Cell growth and death	1	1	2	134	0.632636	0.85932	ENSBGRG00000020812	ENSBGRG00000012579(FOXO1)	http://www.kegg.jp/kegg-bin/show_pathway?map=map04218&multi_query=K06751+%23FFFFFF,red%0d%0aK07201+%23FFFFFF,green%0d%0a
BP	GO:0006393	termination of mitochondrial transcription	0	1	1	1	-	ENSBGRG00000019825(MTERF1)	0.0172567	0.270112		ko04520	Adherens junction	Cellular Processes	Cellular community - eukaryotes	0	1	1	64	0.642762	0.85932	-	ENSBGRG00000012778(CDH1)	http://www.kegg.jp/kegg-bin/show_pathway?map=map04520&multi_query=K05689+%23FFFFFF,green%0d%0a
BP	GO:0009698	phenylpropanoid metabolic process	1	0	1	1	ENSBGRG00000010949(CYP2D6)	-	0.0172567	0.270112		ko04920	Adipocytokine signaling pathway	Organismal Systems	Endocrine system	0	1	1	64	0.642762	0.85932	-	ENSBGRG00000014262(PPARGC1A)	http://www.kegg.jp/kegg-bin/show_pathway?map=map04920&multi_query=K07202+%23FFFFFF,green%0d%0a
BP	GO:0009804	coumarin metabolic process	1	0	1	1	ENSBGRG00000010949(CYP2D6)	-	0.0172567	0.270112		ko05218	Melanoma	Human Diseases	Cancer: specific types	0	1	1	64	0.642762	0.85932	-	ENSBGRG00000012778(CDH1)	http://www.kegg.jp/kegg-bin/show_pathway?map=map05218&multi_query=K05689+%23FFFFFF,green%0d%0a
BP	GO:0009822	alkaloid catabolic process	1	0	1	1	ENSBGRG00000010949(CYP2D6)	-	0.0172567	0.270112		ko05200	Pathways in cancer	Human Diseases	Cancer: overview	5	2	7	478	0.643472	0.85932	ENSBGRG00000005083(COL4A2),ENSBGRG00000004437(COL4A1),ENSBGRG00000007226,ENSBGRG00000009096(FOS),ENSBGRG00000021195(LAMA5)	ENSBGRG00000012579(FOXO1),ENSBGRG00000012778(CDH1)	http://www.kegg.jp/kegg-bin/show_pathway?map=map05200&multi_query=K04379+%23FFFFFF,red%0d%0aK06237+%23FFFFFF,red%0d%0aK05689+%23FFFFFF,green%0d%0aK04737+%23FFFFFF,red%0d%0aK06240+%23FFFFFF,red%0d%0aK07201+%23FFFFFF,green%0d%0a
BP	GO:0010133	proline catabolic process to glutamate	1	0	1	1	ENSBGRG00000003404(ALDH4A1)	-	0.0172567	0.270112		ko04976	Bile secretion	Organismal Systems	Digestive system	0	1	1	68	0.665123	0.877591	-	ENSBGRG00000011476(KCNN2)	http://www.kegg.jp/kegg-bin/show_pathway?map=map04976&multi_query=K04943+%23FFFFFF,green%0d%0a
BP	GO:0016268	O-glycan processing, core 2	0	1	1	1	-	ENSBGRG00000019923(GCNT1)	0.0172567	0.270112		ko05166	Human T-cell leukemia virus 1 infection	Human Diseases	Infectious disease: viral	3	0	3	214	0.666345	0.877591	ENSBGRG00000009096(FOS),ENSBGRG00000019125,ENSBGRG00000020812	-	http://www.kegg.jp/kegg-bin/show_pathway?map=map05166&multi_query=K04379+%23FFFFFF,red%0d%0aK06751+%23FFFFFF,red%0d%0aK06752+%23FFFFFF,red%0d%0a
BP	GO:0016557	peroxisome membrane biogenesis	1	0	1	1	ENSBGRG00000010057(PEX16)	-	0.0172567	0.270112		ko05161	Hepatitis B	Human Diseases	Infectious disease: viral	1	1	2	145	0.675337	0.877591	ENSBGRG00000009096(FOS)	ENSBGRG00000017549(TLR2)	http://www.kegg.jp/kegg-bin/show_pathway?map=map05161&multi_query=K10159+%23FFFFFF,green%0d%0aK04379+%23FFFFFF,red%0d%0a
BP	GO:0018217	peptidyl-aspartic acid phosphorylation	1	0	1	1	ENSBGRG00000002593(ATP13A2)	-	0.0172567	0.270112		ko04714	Thermogenesis	Organismal Systems	Environmental adaptation	1	2	3	219	0.681653	0.877591	ENSBGRG00000001755	ENSBGRG00000014262(PPARGC1A),ENSBGRG00000003576(KLB)	http://www.kegg.jp/kegg-bin/show_pathway?map=map04714&multi_query=K02140+%23FFFFFF,red%0d%0aK22404+%23FFFFFF,green%0d%0aK07202+%23FFFFFF,green%0d%0a
BP	GO:0021935	cerebellar granule cell precursor tangential migration	1	0	1	1	ENSBGRG00000024327(PLXNA2)	-	0.0172567	0.270112		ko04310	Wnt signaling pathway	Environmental Information Processing	Signal transduction	2	0	2	147	0.682658	0.877591	ENSBGRG00000007004(NKD2),ENSBGRG00000011484(SFRP1)	-	http://www.kegg.jp/kegg-bin/show_pathway?map=map04310&multi_query=K03213+%23FFFFFF,red%0d%0aK02166+%23FFFFFF,red%0d%0a
BP	GO:0032581	ER-dependent peroxisome organization	1	0	1	1	ENSBGRG00000010057(PEX16)	-	0.0172567	0.270112		ko01521	EGFR tyrosine kinase inhibitor resistance	Human Diseases	Drug resistance: antineoplastic	1	0	1	72	0.686096	0.877591	ENSBGRG00000020110(AXL)	-	http://www.kegg.jp/kegg-bin/show_pathway?map=map01521&multi_query=K05115+%23FFFFFF,red%0d%0a
BP	GO:0033076	isoquinoline alkaloid metabolic process	1	0	1	1	ENSBGRG00000010949(CYP2D6)	-	0.0172567	0.270112		ko05164	Influenza A	Human Diseases	Infectious disease: viral	1	1	2	148	0.686268	0.877591	ENSBGRG00000019125	ENSBGRG00000020251	http://www.kegg.jp/kegg-bin/show_pathway?map=map05164&multi_query=K06752+%23FFFFFF,red%0d%0aK14624+%23FFFFFF,green%0d%0a
BP	GO:0033626	positive regulation of integrin activation by cell surface receptor linked signal transduction	0	1	1	1	-	ENSBGRG00000008888(CDH17)	0.0172567	0.270112		ko04666	Fc gamma R-mediated phagocytosis	Organismal Systems	Immune system	1	0	1	78	0.715137	0.878918	ENSBGRG00000017840(ARF6)	-	http://www.kegg.jp/kegg-bin/show_pathway?map=map04666&multi_query=K07941+%23FFFFFF,red%0d%0a
BP	GO:0035780	CD80 biosynthetic process	1	0	1	1	ENSBGRG00000005603(TMEM106A)	-	0.0172567	0.270112		ko04062	Chemokine signaling pathway	Organismal Systems	Immune system	1	1	2	157	0.717275	0.878918	ENSBGRG00000026252(PXN)	ENSBGRG00000020251	http://www.kegg.jp/kegg-bin/show_pathway?map=map04062&multi_query=K05760+%23FFFFFF,red%0d%0aK14624+%23FFFFFF,green%0d%0a
BP	GO:0038124	toll-like receptor TLR6:TLR2 signaling pathway	0	1	1	1	-	ENSBGRG00000017549(TLR2)	0.0172567	0.270112		ko05210	Colorectal cancer	Human Diseases	Cancer: specific types	1	0	1	79	0.719711	0.878918	ENSBGRG00000009096(FOS)	-	http://www.kegg.jp/kegg-bin/show_pathway?map=map05210&multi_query=K04379+%23FFFFFF,red%0d%0a
BP	GO:0042700	luteinizing hormone signaling pathway	0	1	1	1	-	ENSBGRG00000011219(LHCGR)	0.0172567	0.270112		ko04630	JAK-STAT signaling pathway	Environmental Information Processing	Signal transduction	2	0	2	159	0.723809	0.878918	ENSBGRG00000023432(IL10RA),ENSBGRG00000007226	-	http://www.kegg.jp/kegg-bin/show_pathway?map=map04630&multi_query=K04737+%23FFFFFF,red%0d%0aK05134+%23FFFFFF,red%0d%0a
BP	GO:0042941	D-alanine transport	1	0	1	1	ENSBGRG00000012434(SLC7A10)	-	0.0172567	0.270112		ko04613	Neutrophil extracellular trap formation	Organismal Systems	Immune system	1	1	2	160	0.727029	0.878918	ENSBGRG00000016458	ENSBGRG00000017549(TLR2)	http://www.kegg.jp/kegg-bin/show_pathway?map=map04613&multi_query=K11252+%23FFFFFF,red%0d%0aK10159+%23FFFFFF,green%0d%0a
BP	GO:0042942	D-serine transport	1	0	1	1	ENSBGRG00000012434(SLC7A10)	-	0.0172567	0.270112		ko05231	Choline metabolism in cancer	Human Diseases	Cancer: overview	1	0	1	82	0.733001	0.878918	ENSBGRG00000009096(FOS)	-	http://www.kegg.jp/kegg-bin/show_pathway?map=map05231&multi_query=K04379+%23FFFFFF,red%0d%0a
BP	GO:0043335	protein unfolding	1	0	1	1	ENSBGRG00000025096(ANGPTL4)	-	0.0172567	0.270112		ko04350	TGF-beta signaling pathway	Environmental Information Processing	Signal transduction	0	1	1	82	0.733001	0.878918	-	ENSBGRG00000009051(ACVR1C)	http://www.kegg.jp/kegg-bin/show_pathway?map=map04350&multi_query=K13568+%23FFFFFF,green%0d%0a
BP	GO:0044332	Wnt signaling pathway involved in dorsal/ventral axis specification	1	0	1	1	ENSBGRG00000011484(SFRP1)	-	0.0172567	0.270112		ko01522	Endocrine resistance	Human Diseases	Drug resistance: antineoplastic	1	0	1	82	0.733001	0.878918	ENSBGRG00000009096(FOS)	-	http://www.kegg.jp/kegg-bin/show_pathway?map=map01522&multi_query=K04379+%23FFFFFF,red%0d%0a
BP	GO:0044345	stromal-epithelial cell signaling involved in prostate gland development	1	0	1	1	ENSBGRG00000011484(SFRP1)	-	0.0172567	0.270112		ko04713	Circadian entrainment	Organismal Systems	Environmental adaptation	1	0	1	82	0.733001	0.878918	ENSBGRG00000009096(FOS)	-	http://www.kegg.jp/kegg-bin/show_pathway?map=map04713&multi_query=K04379+%23FFFFFF,red%0d%0a
BP	GO:0046101	hypoxanthine biosynthetic process	1	0	1	1	ENSBGRG00000014023(ADA)	-	0.0172567	0.270112		ko04260	Cardiac muscle contraction	Organismal Systems	Circulatory system	1	0	1	83	0.737291	0.878918	ENSBGRG00000013193(MYL3)	-	http://www.kegg.jp/kegg-bin/show_pathway?map=map04260&multi_query=K12749+%23FFFFFF,red%0d%0a
BP	GO:0046103	inosine biosynthetic process	1	0	1	1	ENSBGRG00000014023(ADA)	-	0.0172567	0.270112		ko05410	Hypertrophic cardiomyopathy	Human Diseases	Cardiovascular disease	1	0	1	83	0.737291	0.878918	ENSBGRG00000013193(MYL3)	-	http://www.kegg.jp/kegg-bin/show_pathway?map=map05410&multi_query=K12749+%23FFFFFF,red%0d%0a
BP	GO:0046111	xanthine biosynthetic process	1	0	1	1	ENSBGRG00000014023(ADA)	-	0.0172567	0.270112		ko04361	Axon regeneration	Organismal Systems	Development and regeneration	1	0	1	83	0.737291	0.878918	ENSBGRG00000012956(PSD3)	-	http://www.kegg.jp/kegg-bin/show_pathway?map=map04361&multi_query=K12494+%23FFFFFF,red%0d%0a
BP	GO:0060169	negative regulation of adenosine receptor signaling pathway	1	0	1	1	ENSBGRG00000014023(ADA)	-	0.0172567	0.270112		ko05414	Dilated cardiomyopathy	Human Diseases	Cardiovascular disease	1	0	1	86	0.749755	0.883328	ENSBGRG00000013193(MYL3)	-	http://www.kegg.jp/kegg-bin/show_pathway?map=map05414&multi_query=K12749+%23FFFFFF,red%0d%0a
BP	GO:0060405	regulation of penile erection	1	0	1	1	ENSBGRG00000014023(ADA)	-	0.0172567	0.270112		ko04750	Inflammatory mediator regulation of TRP channels	Organismal Systems	Sensory system	0	1	1	86	0.749755	0.883328	-	ENSBGRG00000000718	http://www.kegg.jp/kegg-bin/show_pathway?map=map04750&multi_query=K04723+%23FFFFFF,green%0d%0a
BP	GO:0060407	negative regulation of penile erection	1	0	1	1	ENSBGRG00000014023(ADA)	-	0.0172567	0.270112		ko05150	Staphylococcus aureus infection	Human Diseases	Infectious disease: bacterial	1	0	1	87	0.753777	0.883328	ENSBGRG00000019125	-	http://www.kegg.jp/kegg-bin/show_pathway?map=map05150&multi_query=K06752+%23FFFFFF,red%0d%0a
BP	GO:0072165	anterior mesonephric tubule development	1	0	1	1	ENSBGRG00000021840(OSR1)	-	0.0172567	0.270112		ko05215	Prostate cancer	Human Diseases	Cancer: specific types	0	1	1	88	0.757736	0.883328	-	ENSBGRG00000012579(FOXO1)	http://www.kegg.jp/kegg-bin/show_pathway?map=map05215&multi_query=K07201+%23FFFFFF,green%0d%0a
BP	GO:0072166	posterior mesonephric tubule development	1	0	1	1	ENSBGRG00000021840(OSR1)	-	0.0172567	0.270112		ko00564	Glycerophospholipid metabolism	Metabolism	Lipid metabolism	1	0	1	91	0.769237	0.891808	ENSBGRG00000002916(GPD1)	-	http://www.kegg.jp/kegg-bin/show_pathway?map=map00564&multi_query=K00006+%23FFFFFF,red%0d%0a
BP	GO:0072167	specification of mesonephric tubule identity	1	0	1	1	ENSBGRG00000021840(OSR1)	-	0.0172567	0.270112		ko04928	Parathyroid hormone synthesis, secretion and action	Organismal Systems	Endocrine system	1	0	1	93	0.776603	0.895427	ENSBGRG00000009096(FOS)	-	http://www.kegg.jp/kegg-bin/show_pathway?map=map04928&multi_query=K04379+%23FFFFFF,red%0d%0a
BP	GO:0072168	specification of anterior mesonephric tubule identity	1	0	1	1	ENSBGRG00000021840(OSR1)	-	0.0172567	0.270112		ko04660	T cell receptor signaling pathway	Organismal Systems	Immune system	1	0	1	98	0.794012	0.909179	ENSBGRG00000009096(FOS)	-	http://www.kegg.jp/kegg-bin/show_pathway?map=map04660&multi_query=K04379+%23FFFFFF,red%0d%0a
BP	GO:0072169	specification of posterior mesonephric tubule identity	1	0	1	1	ENSBGRG00000021840(OSR1)	-	0.0172567	0.270112		ko04935	Growth hormone synthesis, secretion and action	Organismal Systems	Endocrine system	1	0	1	99	0.797328	0.909179	ENSBGRG00000009096(FOS)	-	http://www.kegg.jp/kegg-bin/show_pathway?map=map04935&multi_query=K04379+%23FFFFFF,red%0d%0a
BP	GO:0072183	negative regulation of nephron tubule epithelial cell differentiation	1	0	1	1	ENSBGRG00000021840(OSR1)	-	0.0172567	0.270112		ko04064	NF-kappa B signaling pathway	Environmental Information Processing	Signal transduction	1	0	1	103	0.810075	0.909179	ENSBGRG00000018040(CD14)	-	http://www.kegg.jp/kegg-bin/show_pathway?map=map04064&multi_query=K04391+%23FFFFFF,red%0d%0a
BP	GO:0072184	renal vesicle progenitor cell differentiation	1	0	1	1	ENSBGRG00000021840(OSR1)	-	0.0172567	0.270112		ko04380	Osteoclast differentiation	Organismal Systems	Development and regeneration	1	0	1	103	0.810075	0.909179	ENSBGRG00000009096(FOS)	-	http://www.kegg.jp/kegg-bin/show_pathway?map=map04380&multi_query=K04379+%23FFFFFF,red%0d%0a
BP	GO:0072185	metanephric cap development	1	0	1	1	ENSBGRG00000021840(OSR1)	-	0.0172567	0.270112		ko04670	Leukocyte transendothelial migration	Organismal Systems	Immune system	1	0	1	103	0.810075	0.909179	ENSBGRG00000026252(PXN)	-	http://www.kegg.jp/kegg-bin/show_pathway?map=map04670&multi_query=K05760+%23FFFFFF,red%0d%0a
BP	GO:0072186	metanephric cap morphogenesis	1	0	1	1	ENSBGRG00000021840(OSR1)	-	0.0172567	0.270112		ko04015	Rap1 signaling pathway	Environmental Information Processing	Signal transduction	1	1	2	193	0.816767	0.91184	ENSBGRG00000017664(PRKD2)	ENSBGRG00000012778(CDH1)	http://www.kegg.jp/kegg-bin/show_pathway?map=map04015&multi_query=K06070+%23FFFFFF,red%0d%0aK05689+%23FFFFFF,green%0d%0a
BP	GO:0072258	metanephric interstitial fibroblast differentiation	1	0	1	1	ENSBGRG00000021840(OSR1)	-	0.0172567	0.270112		ko04919	Thyroid hormone signaling pathway	Organismal Systems	Endocrine system	0	1	1	110	0.830497	0.914884	-	ENSBGRG00000012579(FOXO1)	http://www.kegg.jp/kegg-bin/show_pathway?map=map04919&multi_query=K07201+%23FFFFFF,green%0d%0a
BP	GO:0072259	metanephric interstitial fibroblast development	1	0	1	1	ENSBGRG00000021840(OSR1)	-	0.0172567	0.270112		ko04024	cAMP signaling pathway	Environmental Information Processing	Signal transduction	1	1	2	200	0.832065	0.914884	ENSBGRG00000009096(FOS)	ENSBGRG00000011219(LHCGR)	http://www.kegg.jp/kegg-bin/show_pathway?map=map04024&multi_query=K04248+%23FFFFFF,green%0d%0aK04379+%23FFFFFF,red%0d%0a
BP	GO:0090094	metanephric cap mesenchymal cell proliferation involved in metanephros development	1	0	1	1	ENSBGRG00000021840(OSR1)	-	0.0172567	0.270112		ko04728	Dopaminergic synapse	Organismal Systems	Nervous system	1	0	1	111	0.833231	0.914884	ENSBGRG00000009096(FOS)	-	http://www.kegg.jp/kegg-bin/show_pathway?map=map04728&multi_query=K04379+%23FFFFFF,red%0d%0a
BP	GO:0090246	convergent extension involved in somitogenesis	1	0	1	1	ENSBGRG00000011484(SFRP1)	-	0.0172567	0.270112		ko05208	Chemical carcinogenesis - reactive oxygen species	Human Diseases	Cancer: overview	2	0	2	204	0.840286	0.914884	ENSBGRG00000017664(PRKD2),ENSBGRG00000009096(FOS)	-	http://www.kegg.jp/kegg-bin/show_pathway?map=map05208&multi_query=K04379+%23FFFFFF,red%0d%0aK06070+%23FFFFFF,red%0d%0a
BP	GO:0090347	regulation of cellular organohalogen metabolic process	1	0	1	1	ENSBGRG00000010949(CYP2D6)	-	0.0172567	0.270112		ko04068	FoxO signaling pathway	Environmental Information Processing	Signal transduction	0	1	1	114	0.841173	0.914884	-	ENSBGRG00000012579(FOXO1)	http://www.kegg.jp/kegg-bin/show_pathway?map=map04068&multi_query=K07201+%23FFFFFF,green%0d%0a
BP	GO:0090348	regulation of cellular organofluorine metabolic process	1	0	1	1	ENSBGRG00000010949(CYP2D6)	-	0.0172567	0.270112		ko04921	Oxytocin signaling pathway	Organismal Systems	Endocrine system	1	0	1	124	0.865035	0.929385	ENSBGRG00000009096(FOS)	-	http://www.kegg.jp/kegg-bin/show_pathway?map=map04921&multi_query=K04379+%23FFFFFF,red%0d%0a
BP	GO:0090349	negative regulation of cellular organohalogen metabolic process	1	0	1	1	ENSBGRG00000010949(CYP2D6)	-	0.0172567	0.270112		ko05017	Spinocerebellar ataxia	Human Diseases	Neurodegenerative disease	1	0	1	127	0.871474	0.929385	ENSBGRG00000022357	-	http://www.kegg.jp/kegg-bin/show_pathway?map=map05017&multi_query=K08956+%23FFFFFF,red%0d%0a
BP	GO:0090350	negative regulation of cellular organofluorine metabolic process	1	0	1	1	ENSBGRG00000010949(CYP2D6)	-	0.0172567	0.270112		ko04550	Signaling pathways regulating pluripotency of stem cells	Cellular Processes	Cellular community - eukaryotes	0	1	1	127	0.871474	0.929385	-	ENSBGRG00000009051(ACVR1C)	http://www.kegg.jp/kegg-bin/show_pathway?map=map04550&multi_query=K13568+%23FFFFFF,green%0d%0a
BP	GO:0090410	malonate catabolic process	1	0	1	1	ENSBGRG00000026875(ACSF3)	-	0.0172567	0.270112		ko04072	Phospholipase D signaling pathway	Environmental Information Processing	Signal transduction	1	0	1	129	0.875596	0.929385	ENSBGRG00000017840(ARF6)	-	http://www.kegg.jp/kegg-bin/show_pathway?map=map04072&multi_query=K07941+%23FFFFFF,red%0d%0a
BP	GO:0097151	positive regulation of inhibitory postsynaptic potential	1	0	1	1	ENSBGRG00000019591(NLGN2)	-	0.0172567	0.270112		ko05224	Breast cancer	Human Diseases	Cancer: specific types	1	0	1	131	0.879588	0.929385	ENSBGRG00000009096(FOS)	-	http://www.kegg.jp/kegg-bin/show_pathway?map=map05224&multi_query=K04379+%23FFFFFF,red%0d%0a
BP	GO:0098828	modulation of inhibitory postsynaptic potential	1	0	1	1	ENSBGRG00000019591(NLGN2)	-	0.0172567	0.270112		ko00190	Oxidative phosphorylation	Metabolism	Energy metabolism	1	0	1	133	0.883452	0.929385	ENSBGRG00000001755	-	http://www.kegg.jp/kegg-bin/show_pathway?map=map00190&multi_query=K02140+%23FFFFFF,red%0d%0a
BP	GO:0099606	microtubule plus-end directed mitotic chromosome migration	1	0	1	1	ENSBGRG00000003703(CENPE)	-	0.0172567	0.270112		ko04934	Cushing syndrome	Human Diseases	Endocrine and metabolic disease	1	0	1	134	0.885338	0.929385	ENSBGRG00000000523(NR4A1)	-	http://www.kegg.jp/kegg-bin/show_pathway?map=map04934&multi_query=K04465+%23FFFFFF,red%0d%0a
BP	GO:0099627	neurotransmitter receptor cycle	1	0	1	1	ENSBGRG00000010087(NSG1)	-	0.0172567	0.270112		ko05206	MicroRNAs in cancer	Human Diseases	Cancer: overview	1	0	1	142	0.899375	0.939446	ENSBGRG00000012849(SLC45A3)	-	http://www.kegg.jp/kegg-bin/show_pathway?map=map05206&multi_query=K15379+%23FFFFFF,red%0d%0a
BP	GO:0106101	ER-dependent peroxisome localization	1	0	1	1	ENSBGRG00000010057(PEX16)	-	0.0172567	0.270112		ko04932	Non-alcoholic fatty liver disease	Human Diseases	Endocrine and metabolic disease	1	0	1	154	0.917298	0.953361	ENSBGRG00000009096(FOS)	-	http://www.kegg.jp/kegg-bin/show_pathway?map=map04932&multi_query=K04379+%23FFFFFF,red%0d%0a
BP	GO:1900477	negative regulation of G1/S transition of mitotic cell cycle by negative regulation of transcription from RNA polymerase II promoter	1	0	1	1	ENSBGRG00000024826(NACC2)	-	0.0172567	0.270112		ko05034	Alcoholism	Human Diseases	Substance dependence	1	0	1	158	0.922538	0.953361	ENSBGRG00000016458	-	http://www.kegg.jp/kegg-bin/show_pathway?map=map05034&multi_query=K11252+%23FFFFFF,red%0d%0a
BP	GO:1901860	positive regulation of mitochondrial DNA metabolic process	0	1	1	1	-	ENSBGRG00000014262(PPARGC1A)	0.0172567	0.270112		ko04141	Protein processing in endoplasmic reticulum	Genetic Information Processing	Folding, sorting and degradation	1	0	1	161	0.926251	0.953361	ENSBGRG00000017276(CKAP4)	-	http://www.kegg.jp/kegg-bin/show_pathway?map=map04141&multi_query=K13999+%23FFFFFF,red%0d%0a
BP	GO:1903710	spermine transmembrane transport	1	0	1	1	ENSBGRG00000002593(ATP13A2)	-	0.0172567	0.270112		ko05207	Chemical carcinogenesis - receptor activation	Human Diseases	Cancer: overview	1	0	1	166	0.932051	0.954674	ENSBGRG00000009096(FOS)	-	http://www.kegg.jp/kegg-bin/show_pathway?map=map05207&multi_query=K04379+%23FFFFFF,red%0d%0a
BP	GO:1990938	peptidyl-aspartic acid autophosphorylation	1	0	1	1	ENSBGRG00000002593(ATP13A2)	-	0.0172567	0.270112		ko03010	Ribosome	Genetic Information Processing	Translation	0	1	1	186	0.951063	0.969441	-	ENSBGRG00000016735	http://www.kegg.jp/kegg-bin/show_pathway?map=map03010&multi_query=K02930+%23FFFFFF,green%0d%0a
BP	GO:2000053	regulation of Wnt signaling pathway involved in dorsal/ventral axis specification	1	0	1	1	ENSBGRG00000011484(SFRP1)	-	0.0172567	0.270112		ko04810	Regulation of actin cytoskeleton	Cellular Processes	Cell motility	1	0	1	193	0.956384	0.970178	ENSBGRG00000026252(PXN)	-	http://www.kegg.jp/kegg-bin/show_pathway?map=map04810&multi_query=K05760+%23FFFFFF,red%0d%0a
BP	GO:2000054	negative regulation of Wnt signaling pathway involved in dorsal/ventral axis specification	1	0	1	1	ENSBGRG00000011484(SFRP1)	-	0.0172567	0.270112		ko04014	Ras signaling pathway	Environmental Information Processing	Signal transduction	1	0	1	215	0.969645	0.976211	ENSBGRG00000017840(ARF6)	-	http://www.kegg.jp/kegg-bin/show_pathway?map=map04014&multi_query=K07941+%23FFFFFF,red%0d%0a
BP	GO:2000080	negative regulation of canonical Wnt signaling pathway involved in controlling type B pancreatic cell proliferation	1	0	1	1	ENSBGRG00000011484(SFRP1)	-	0.0172567	0.270112		ko04020	Calcium signaling pathway	Environmental Information Processing	Signal transduction	0	1	1	219	0.971585	0.976211	-	ENSBGRG00000011219(LHCGR)	http://www.kegg.jp/kegg-bin/show_pathway?map=map04020&multi_query=K04248+%23FFFFFF,green%0d%0a
BP	GO:0042398	cellular modified amino acid biosynthetic process	3	0	3	32	ENSBGRG00000015533(GAMT),ENSBGRG00000025244(SLC27A1),ENSBGRG00000025536(PLOD3)	-	0.0174081	0.270112		ko05016	Huntington disease	Human Diseases	Neurodegenerative disease	0	1	1	276	0.988956	0.988956	-	ENSBGRG00000014262(PPARGC1A)	http://www.kegg.jp/kegg-bin/show_pathway?map=map05016&multi_query=K07202+%23FFFFFF,green%0d%0a
BP	GO:0086009	membrane repolarization	2	1	3	32	ENSBGRG00000004337(KCNH2),ENSBGRG00000022985(SCN4B)	ENSBGRG00000011476(KCNN2)	0.0174081	0.270112
BP	GO:0009143	nucleoside triphosphate catabolic process	1	1	2	12	ENSBGRG00000014023(ADA)	ENSBGRG00000021648(ENPP1)	0.0174627	0.270112
BP	GO:0038065	collagen-activated signaling pathway	2	0	2	12	ENSBGRG00000004437(COL4A1),ENSBGRG00000005083(COL4A2)	-	0.0174627	0.270112
BP	GO:0086011	membrane repolarization during action potential	1	1	2	12	ENSBGRG00000004337(KCNH2)	ENSBGRG00000011476(KCNN2)	0.0174627	0.270112
BP	GO:0097734	extracellular exosome biogenesis	1	1	2	12	ENSBGRG00000002593(ATP13A2)	ENSBGRG00000012363(SDC4)	0.0174627	0.270112
BP	GO:1903541	regulation of exosomal secretion	1	1	2	12	ENSBGRG00000002593(ATP13A2)	ENSBGRG00000012363(SDC4)	0.0174627	0.270112
BP	GO:1990182	exosomal secretion	1	1	2	12	ENSBGRG00000002593(ATP13A2)	ENSBGRG00000012363(SDC4)	0.0174627	0.270112
BP	GO:0009142	nucleoside triphosphate biosynthetic process	3	1	4	58	ENSBGRG00000001755,ENSBGRG00000012014(ENO1),ENSBGRG00000026159(NME3)	ENSBGRG00000014262(PPARGC1A)	0.0177258	0.272929
BP	GO:0071496	cellular response to external stimulus	7	1	8	191	ENSBGRG00000001080(ELAPOR1),ENSBGRG00000008094(KLF10),ENSBGRG00000009096(FOS),ENSBGRG00000009666(PIK3C2B),ENSBGRG00000011484(SFRP1),ENSBGRG00000013936(MYBBP1A),ENSBGRG00000020110(AXL)	ENSBGRG00000012579(FOXO1)	0.017878	0.274022
BP	GO:0009888	tissue development	24	8	32	1271	ENSBGRG00000000313(CCN1),ENSBGRG00000000523(NR4A1),ENSBGRG00000002480(SOX7),ENSBGRG00000004437(COL4A1),ENSBGRG00000005083(COL4A2),ENSBGRG00000008094(KLF10),ENSBGRG00000008276(SLC25A25),ENSBGRG00000009080(PYGO2),ENSBGRG00000009096(FOS),ENSBGRG00000009629(BMP1),ENSBGRG00000011484(SFRP1),ENSBGRG00000014023(ADA),ENSBGRG00000014778(PGK1),ENSBGRG00000021195(LAMA5),ENSBGRG00000021840(OSR1),ENSBGRG000000…	ENSBGRG00000004102(STK3),ENSBGRG00000012363(SDC4),ENSBGRG00000014062(ABI1),ENSBGRG00000014262(PPARGC1A),ENSBGRG00000016750(TIPARP),ENSBGRG00000019923(GCNT1),ENSBGRG00000021648(ENPP1),ENSBGRG00000025786(ARID5B)	0.0189946	0.289818
BP	GO:0009058	biosynthetic process	55	31	86	4111	ENSBGRG00000000313(CCN1),ENSBGRG00000000523(NR4A1),ENSBGRG00000001124(PPOX),ENSBGRG00000001755,ENSBGRG00000002161(POMGNT1),ENSBGRG00000002480(SOX7),ENSBGRG00000002916(GPD1),ENSBGRG00000003738(CC2D1B),ENSBGRG00000004337(KCNH2),ENSBGRG00000005083(COL4A2),ENSBGRG00000005144(MOCS3),ENSBGRG00000005603(TMEM106A),ENSBGRG00000006039(XYLT2),ENSBGRG00000006582(L3MBTL2),ENSBGRG00000008094(KLF10),ENSBGRG0000…	ENSBGRG00000001029(GTF3C3),ENSBGRG00000001610(GABPB2),ENSBGRG00000002918(PFDN5),ENSBGRG00000003232(LRIF1),ENSBGRG00000003528(WDR75),ENSBGRG00000003542(PRIM1),ENSBGRG00000003633(TF),ENSBGRG00000004102(STK3),ENSBGRG00000007270(NLRC4),ENSBGRG00000007410(NAMPT),ENSBGRG00000008695(PBLD),ENSBGRG00000010670(EIF1AX),ENSBGRG00000010694(AMD1),ENSBGRG00000011219(LHCGR),ENSBGRG00000012579(FOXO1),ENSBGRG00000…	0.0195141	0.296404
BP	GO:0071248	cellular response to metal ion	3	2	5	90	ENSBGRG00000002593(ATP13A2),ENSBGRG00000009096(FOS),ENSBGRG00000026269(MYOG)	ENSBGRG00000003633(TF),ENSBGRG00000012778(CDH1)	0.0196974	0.297846
BP	GO:0010765	positive regulation of sodium ion transport	1	1	2	13	ENSBGRG00000022985(SCN4B)	ENSBGRG00000012965(SCN3B)	0.0204057	0.300282
BP	GO:0034695	response to prostaglandin E	2	0	2	13	ENSBGRG00000007264(TNFSF4),ENSBGRG00000011484(SFRP1)	-	0.0204057	0.300282
BP	GO:0071391	cellular response to estrogen stimulus	2	0	2	13	ENSBGRG00000011484(SFRP1),ENSBGRG00000026795(ARID5A)	-	0.0204057	0.300282
BP	GO:0071392	cellular response to estradiol stimulus	2	0	2	13	ENSBGRG00000011484(SFRP1),ENSBGRG00000026269(MYOG)	-	0.0204057	0.300282
BP	GO:0098543	detection of other organism	0	2	2	13	-	ENSBGRG00000007270(NLRC4),ENSBGRG00000017549(TLR2)	0.0204057	0.300282
BP	GO:0009165	nucleotide biosynthetic process	5	2	7	159	ENSBGRG00000001755,ENSBGRG00000012014(ENO1),ENSBGRG00000014023(ADA),ENSBGRG00000019722,ENSBGRG00000026159(NME3)	ENSBGRG00000007410(NAMPT),ENSBGRG00000014262(PPARGC1A)	0.0204175	0.300282
BP	GO:0030166	proteoglycan biosynthetic process	2	1	3	34	ENSBGRG00000006039(XYLT2),ENSBGRG00000019794(CANT1)	ENSBGRG00000020997(GLCE)	0.0204819	0.300282
BP	GO:0040012	regulation of locomotion	12	7	19	662	ENSBGRG00000000313(CCN1),ENSBGRG00000003011(PODN),ENSBGRG00000005949(ARHGEF39),ENSBGRG00000006266(S100A14),ENSBGRG00000011484(SFRP1),ENSBGRG00000014023(ADA),ENSBGRG00000017288(ADGRG1),ENSBGRG00000017664(PRKD2),ENSBGRG00000017840(ARF6),ENSBGRG00000021195(LAMA5),ENSBGRG00000022167(GPI),ENSBGRG00000024327(PLXNA2)	ENSBGRG00000003633(TF),ENSBGRG00000009051(ACVR1C),ENSBGRG00000012363(SDC4),ENSBGRG00000012778(CDH1),ENSBGRG00000015268(PTPRK),ENSBGRG00000019923(GCNT1),ENSBGRG00000020150(ULK4)	0.0207309	0.301894
BP	GO:0019752	carboxylic acid metabolic process	16	1	17	572	ENSBGRG00000002916(GPD1),ENSBGRG00000003404(ALDH4A1),ENSBGRG00000012014(ENO1),ENSBGRG00000012849(SLC45A3),ENSBGRG00000012998(ABCC10),ENSBGRG00000013574(PKM),ENSBGRG00000014778(PGK1),ENSBGRG00000015533(GAMT),ENSBGRG00000017531(CRAT),ENSBGRG00000017727(ILVBL),ENSBGRG00000019059(BCKDHA),ENSBGRG00000021836(TPI1),ENSBGRG00000022167(GPI),ENSBGRG00000025536(PLOD3),ENSBGRG00000026412(ACADS),ENSBGRG000000…	ENSBGRG00000016397(CYP4V2)	0.0207709	0.301894
BP	GO:0009101	glycoprotein biosynthetic process	6	2	8	198	ENSBGRG00000002161(POMGNT1),ENSBGRG00000005603(TMEM106A),ENSBGRG00000006039(XYLT2),ENSBGRG00000008937(EXTL1),ENSBGRG00000019794(CANT1),ENSBGRG00000025536(PLOD3)	ENSBGRG00000019923(GCNT1),ENSBGRG00000020997(GLCE)	0.0216673	0.313571
BP	GO:0009199	ribonucleoside triphosphate metabolic process	3	1	4	62	ENSBGRG00000001755,ENSBGRG00000012014(ENO1),ENSBGRG00000026159(NME3)	ENSBGRG00000014262(PPARGC1A)	0.0221048	0.317445
BP	GO:1902041	regulation of extrinsic apoptotic signaling pathway via death domain receptors	2	1	3	35	ENSBGRG00000011484(SFRP1),ENSBGRG00000015838(TMC8)	ENSBGRG00000004102(STK3)	0.0221233	0.317445
BP	GO:0048514	blood vessel morphogenesis	12	1	13	402	ENSBGRG00000000313(CCN1),ENSBGRG00000000523(NR4A1),ENSBGRG00000004437(COL4A1),ENSBGRG00000005083(COL4A2),ENSBGRG00000013574(PKM),ENSBGRG00000014778(PGK1),ENSBGRG00000015317(MCAM),ENSBGRG00000017288(ADGRG1),ENSBGRG00000017664(PRKD2),ENSBGRG00000017761(PXDN),ENSBGRG00000021903(ROBO4),ENSBGRG00000025096(ANGPTL4)	ENSBGRG00000016750(TIPARP)	0.0224407	0.320636
BP	GO:0051050	positive regulation of transport	10	5	15	489	ENSBGRG00000002593(ATP13A2),ENSBGRG00000004337(KCNH2),ENSBGRG00000006341(NRDE2),ENSBGRG00000006615(SEC16B),ENSBGRG00000017840(ARF6),ENSBGRG00000018040(CD14),ENSBGRG00000019591(NLGN2),ENSBGRG00000020110(AXL),ENSBGRG00000022985(SCN4B),ENSBGRG00000025051(SCAMP5)	ENSBGRG00000003633(TF),ENSBGRG00000012363(SDC4),ENSBGRG00000012778(CDH1),ENSBGRG00000012965(SCN3B),ENSBGRG00000017549(TLR2)	0.0226239	0.32189
BP	GO:1901576	organic substance biosynthetic process	54	30	84	4026	ENSBGRG00000000313(CCN1),ENSBGRG00000000523(NR4A1),ENSBGRG00000001124(PPOX),ENSBGRG00000001755,ENSBGRG00000002161(POMGNT1),ENSBGRG00000002480(SOX7),ENSBGRG00000002916(GPD1),ENSBGRG00000003738(CC2D1B),ENSBGRG00000004337(KCNH2),ENSBGRG00000005083(COL4A2),ENSBGRG00000005144(MOCS3),ENSBGRG00000005603(TMEM106A),ENSBGRG00000006039(XYLT2),ENSBGRG00000006582(L3MBTL2),ENSBGRG00000008094(KLF10),ENSBGRG0000…	ENSBGRG00000001029(GTF3C3),ENSBGRG00000001610(GABPB2),ENSBGRG00000002918(PFDN5),ENSBGRG00000003232(LRIF1),ENSBGRG00000003528(WDR75),ENSBGRG00000003542(PRIM1),ENSBGRG00000003633(TF),ENSBGRG00000004102(STK3),ENSBGRG00000007270(NLRC4),ENSBGRG00000007410(NAMPT),ENSBGRG00000010670(EIF1AX),ENSBGRG00000010694(AMD1),ENSBGRG00000011219(LHCGR),ENSBGRG00000012579(FOXO1),ENSBGRG00000012778(CDH1),ENSBGRG00000…	0.02273	0.322041
BP	GO:0030048	actin filament-based movement	2	2	4	63	ENSBGRG00000004337(KCNH2),ENSBGRG00000022985(SCN4B)	ENSBGRG00000011476(KCNN2),ENSBGRG00000012965(SCN3B)	0.0232936	0.323977
BP	GO:0034694	response to prostaglandin	2	0	2	14	ENSBGRG00000007264(TNFSF4),ENSBGRG00000011484(SFRP1)	-	0.0235392	0.323977
BP	GO:0051647	nucleus localization	2	0	2	14	ENSBGRG00000014538(PABPC1L),ENSBGRG00000026122(SLIT1)	-	0.0235392	0.323977
BP	GO:0061484	hematopoietic stem cell homeostasis	2	0	2	14	ENSBGRG00000015957(GLIS2),ENSBGRG00000017288(ADGRG1)	-	0.0235392	0.323977
BP	GO:0072520	seminiferous tubule development	1	1	2	14	ENSBGRG00000017288(ADGRG1)	ENSBGRG00000011219(LHCGR)	0.0235392	0.323977
BP	GO:0072673	lamellipodium morphogenesis	1	1	2	14	ENSBGRG00000017135(PLEKHO1)	ENSBGRG00000014062(ABI1)	0.0235392	0.323977
BP	GO:0140112	extracellular vesicle biogenesis	1	1	2	14	ENSBGRG00000002593(ATP13A2)	ENSBGRG00000012363(SDC4)	0.0235392	0.323977
BP	GO:0002028	regulation of sodium ion transport	2	1	3	36	ENSBGRG00000021840(OSR1),ENSBGRG00000022985(SCN4B)	ENSBGRG00000012965(SCN3B)	0.0238344	0.326706
BP	GO:0051270	regulation of cellular component movement	12	7	19	674	ENSBGRG00000000313(CCN1),ENSBGRG00000003011(PODN),ENSBGRG00000005949(ARHGEF39),ENSBGRG00000006266(S100A14),ENSBGRG00000011484(SFRP1),ENSBGRG00000014023(ADA),ENSBGRG00000017288(ADGRG1),ENSBGRG00000017664(PRKD2),ENSBGRG00000017840(ARF6),ENSBGRG00000021195(LAMA5),ENSBGRG00000022167(GPI),ENSBGRG00000024327(PLXNA2)	ENSBGRG00000003633(TF),ENSBGRG00000009051(ACVR1C),ENSBGRG00000012363(SDC4),ENSBGRG00000012778(CDH1),ENSBGRG00000015268(PTPRK),ENSBGRG00000019923(GCNT1),ENSBGRG00000020150(ULK4)	0.0244195	0.333371
BP	GO:1901293	nucleoside phosphate biosynthetic process	5	2	7	166	ENSBGRG00000001755,ENSBGRG00000012014(ENO1),ENSBGRG00000014023(ADA),ENSBGRG00000019722,ENSBGRG00000026159(NME3)	ENSBGRG00000007410(NAMPT),ENSBGRG00000014262(PPARGC1A)	0.0251308	0.338356
BP	GO:0010628	positive regulation of gene expression	27	11	38	1600	ENSBGRG00000000313(CCN1),ENSBGRG00000000523(NR4A1),ENSBGRG00000002480(SOX7),ENSBGRG00000002593(ATP13A2),ENSBGRG00000004337(KCNH2),ENSBGRG00000005603(TMEM106A),ENSBGRG00000006615(SEC16B),ENSBGRG00000007004(NKD2),ENSBGRG00000007264(TNFSF4),ENSBGRG00000008094(KLF10),ENSBGRG00000008923(PTGES2),ENSBGRG00000009096(FOS),ENSBGRG00000011484(SFRP1),ENSBGRG00000012014(ENO1),ENSBGRG00000012066(EBF3),ENSBGRG0…	ENSBGRG00000001610(GABPB2),ENSBGRG00000003528(WDR75),ENSBGRG00000003633(TF),ENSBGRG00000007270(NLRC4),ENSBGRG00000007410(NAMPT),ENSBGRG00000012579(FOXO1),ENSBGRG00000012778(CDH1),ENSBGRG00000013181(TAF9),ENSBGRG00000014262(PPARGC1A),ENSBGRG00000017549(TLR2),ENSBGRG00000018410(NR6A1)	0.0252114	0.338356
BP	GO:0048608	reproductive structure development	6	4	10	284	ENSBGRG00000000313(CCN1),ENSBGRG00000011484(SFRP1),ENSBGRG00000014023(ADA),ENSBGRG00000017288(ADGRG1),ENSBGRG00000020110(AXL),ENSBGRG00000021840(OSR1)	ENSBGRG00000004102(STK3),ENSBGRG00000011219(LHCGR),ENSBGRG00000016750(TIPARP),ENSBGRG00000025786(ARID5B)	0.0257852	0.338356
BP	GO:0090090	negative regulation of canonical Wnt signaling pathway	3	2	5	97	ENSBGRG00000007004(NKD2),ENSBGRG00000011023(TMEM88),ENSBGRG00000011484(SFRP1)	ENSBGRG00000002918(PFDN5),ENSBGRG00000004102(STK3)	0.0262483	0.338356
BP	GO:0060307	regulation of ventricular cardiac muscle cell membrane repolarization	2	0	2	15	ENSBGRG00000004337(KCNH2),ENSBGRG00000022985(SCN4B)	-	0.026856	0.338356
BP	GO:0001655	urogenital system development	6	3	9	246	ENSBGRG00000004437(COL4A1),ENSBGRG00000009080(PYGO2),ENSBGRG00000011484(SFRP1),ENSBGRG00000015957(GLIS2),ENSBGRG00000021195(LAMA5),ENSBGRG00000021840(OSR1)	ENSBGRG00000016750(TIPARP),ENSBGRG00000019923(GCNT1),ENSBGRG00000025786(ARID5B)	0.0271219	0.338356
BP	GO:0061458	reproductive system development	6	4	10	287	ENSBGRG00000000313(CCN1),ENSBGRG00000011484(SFRP1),ENSBGRG00000014023(ADA),ENSBGRG00000017288(ADGRG1),ENSBGRG00000020110(AXL),ENSBGRG00000021840(OSR1)	ENSBGRG00000004102(STK3),ENSBGRG00000011219(LHCGR),ENSBGRG00000016750(TIPARP),ENSBGRG00000025786(ARID5B)	0.0274563	0.338356
BP	GO:0060070	canonical Wnt signaling pathway	6	2	8	209	ENSBGRG00000002480(SOX7),ENSBGRG00000007004(NKD2),ENSBGRG00000007368(FAM53B),ENSBGRG00000009080(PYGO2),ENSBGRG00000011023(TMEM88),ENSBGRG00000011484(SFRP1)	ENSBGRG00000002918(PFDN5),ENSBGRG00000004102(STK3)	0.0287194	0.338356
BP	GO:0000768	syncytium formation by plasma membrane fusion	3	0	3	39	ENSBGRG00000017135(PLEKHO1),ENSBGRG00000022747(DYRK1B),ENSBGRG00000026269(MYOG)	-	0.0293856	0.338356
BP	GO:0006754	ATP biosynthetic process	2	1	3	39	ENSBGRG00000001755,ENSBGRG00000012014(ENO1)	ENSBGRG00000014262(PPARGC1A)	0.0293856	0.338356
BP	GO:0031638	zymogen activation	2	1	3	39	ENSBGRG00000012014(ENO1),ENSBGRG00000014778(PGK1)	ENSBGRG00000007270(NLRC4)	0.0293856	0.338356
BP	GO:0140253	cell-cell fusion	3	0	3	39	ENSBGRG00000017135(PLEKHO1),ENSBGRG00000022747(DYRK1B),ENSBGRG00000026269(MYOG)	-	0.0293856	0.338356
BP	GO:0071241	cellular response to inorganic substance	3	2	5	100	ENSBGRG00000002593(ATP13A2),ENSBGRG00000009096(FOS),ENSBGRG00000026269(MYOG)	ENSBGRG00000003633(TF),ENSBGRG00000012778(CDH1)	0.029435	0.338356
BP	GO:0044238	primary metabolic process	92	50	142	7379	ENSBGRG00000000257(SLX9),ENSBGRG00000000313(CCN1),ENSBGRG00000000523(NR4A1),ENSBGRG00000001755,ENSBGRG00000002161(POMGNT1),ENSBGRG00000002480(SOX7),ENSBGRG00000002593(ATP13A2),ENSBGRG00000002916(GPD1),ENSBGRG00000003335(HECTD3),ENSBGRG00000003404(ALDH4A1),ENSBGRG00000003703(CENPE),ENSBGRG00000003738(CC2D1B),ENSBGRG00000004287(PPM1J),ENSBGRG00000004337(KCNH2),ENSBGRG00000004503(LMF2),ENSBGRG000000…	ENSBGRG00000001029(GTF3C3),ENSBGRG00000001610(GABPB2),ENSBGRG00000002918(PFDN5),ENSBGRG00000003232(LRIF1),ENSBGRG00000003528(WDR75),ENSBGRG00000003542(PRIM1),ENSBGRG00000003576(KLB),ENSBGRG00000003633(TF),ENSBGRG00000004102(STK3),ENSBGRG00000005859(TADA1),ENSBGRG00000006896(TRIP13),ENSBGRG00000007139(KLHL15),ENSBGRG00000007270(NLRC4),ENSBGRG00000007410(NAMPT),ENSBGRG00000007957(PLCH1),ENSBGRG0000…	0.0295912	0.338356
BP	GO:0060828	regulation of canonical Wnt signaling pathway	5	2	7	172	ENSBGRG00000002480(SOX7),ENSBGRG00000007004(NKD2),ENSBGRG00000007368(FAM53B),ENSBGRG00000011023(TMEM88),ENSBGRG00000011484(SFRP1)	ENSBGRG00000002918(PFDN5),ENSBGRG00000004102(STK3)	0.0297243	0.338356
BP	GO:0019395	fatty acid oxidation	3	1	4	68	ENSBGRG00000017531(CRAT),ENSBGRG00000017727(ILVBL),ENSBGRG00000026412(ACADS)	ENSBGRG00000016397(CYP4V2)	0.0298146	0.338356
BP	GO:0001568	blood vessel development	13	1	14	463	ENSBGRG00000000313(CCN1),ENSBGRG00000000523(NR4A1),ENSBGRG00000004437(COL4A1),ENSBGRG00000005083(COL4A2),ENSBGRG00000013574(PKM),ENSBGRG00000014778(PGK1),ENSBGRG00000015317(MCAM),ENSBGRG00000017288(ADGRG1),ENSBGRG00000017664(PRKD2),ENSBGRG00000017761(PXDN),ENSBGRG00000021840(OSR1),ENSBGRG00000021903(ROBO4),ENSBGRG00000025096(ANGPTL4)	ENSBGRG00000016750(TIPARP)	0.0301292	0.338356
BP	GO:0009648	photoperiodism	1	1	2	16	ENSBGRG00000024506(NR2F6)	ENSBGRG00000021547(FBXL3)	0.0303489	0.338356
BP	GO:0043153	entrainment of circadian clock by photoperiod	1	1	2	16	ENSBGRG00000024506(NR2F6)	ENSBGRG00000021547(FBXL3)	0.0303489	0.338356
BP	GO:0060021	roof of mouth development	2	2	4	69	ENSBGRG00000009080(PYGO2),ENSBGRG00000021840(OSR1)	ENSBGRG00000016750(TIPARP),ENSBGRG00000025786(ARID5B)	0.0312355	0.338356
BP	GO:0060048	cardiac muscle contraction	2	2	4	69	ENSBGRG00000004337(KCNH2),ENSBGRG00000022985(SCN4B)	ENSBGRG00000011476(KCNN2),ENSBGRG00000012965(SCN3B)	0.0312355	0.338356
BP	GO:0006949	syncytium formation	3	0	3	40	ENSBGRG00000017135(PLEKHO1),ENSBGRG00000022747(DYRK1B),ENSBGRG00000026269(MYOG)	-	0.0313747	0.338356
BP	GO:0031669	cellular response to nutrient levels	5	1	6	137	ENSBGRG00000001080(ELAPOR1),ENSBGRG00000008094(KLF10),ENSBGRG00000009666(PIK3C2B),ENSBGRG00000011484(SFRP1),ENSBGRG00000013936(MYBBP1A)	ENSBGRG00000012579(FOXO1)	0.0314761	0.338356
BP	GO:0001822	kidney development	5	3	8	213	ENSBGRG00000009080(PYGO2),ENSBGRG00000011484(SFRP1),ENSBGRG00000015957(GLIS2),ENSBGRG00000021195(LAMA5),ENSBGRG00000021840(OSR1)	ENSBGRG00000016750(TIPARP),ENSBGRG00000019923(GCNT1),ENSBGRG00000025786(ARID5B)	0.031637	0.338356
BP	GO:0030111	regulation of Wnt signaling pathway	5	3	8	213	ENSBGRG00000002480(SOX7),ENSBGRG00000007004(NKD2),ENSBGRG00000007368(FAM53B),ENSBGRG00000011023(TMEM88),ENSBGRG00000011484(SFRP1)	ENSBGRG00000002918(PFDN5),ENSBGRG00000004102(STK3),ENSBGRG00000017549(TLR2)	0.031637	0.338356
BP	GO:0051899	membrane depolarization	2	1	3	41	ENSBGRG00000004337(KCNH2),ENSBGRG00000022985(SCN4B)	ENSBGRG00000012965(SCN3B)	0.0334328	0.338356
BP	GO:0070613	regulation of protein processing	2	1	3	41	ENSBGRG00000007004(NKD2),ENSBGRG00000012014(ENO1)	ENSBGRG00000007270(NLRC4)	0.0334328	0.338356
BP	GO:0008210	estrogen metabolic process	1	1	2	17	ENSBGRG00000010949(CYP2D6)	ENSBGRG00000016750(TIPARP)	0.0340108	0.338356
BP	GO:0009649	entrainment of circadian clock	1	1	2	17	ENSBGRG00000024506(NR2F6)	ENSBGRG00000021547(FBXL3)	0.0340108	0.338356
BP	GO:0046676	negative regulation of insulin secretion	1	1	2	17	ENSBGRG00000011484(SFRP1)	ENSBGRG00000009051(ACVR1C)	0.0340108	0.338356
BP	GO:0099623	regulation of cardiac muscle cell membrane repolarization	2	0	2	17	ENSBGRG00000004337(KCNH2),ENSBGRG00000022985(SCN4B)	-	0.0340108	0.338356
BP	GO:0099625	ventricular cardiac muscle cell membrane repolarization	2	0	2	17	ENSBGRG00000004337(KCNH2),ENSBGRG00000022985(SCN4B)	-	0.0340108	0.338356
BP	GO:0001508	action potential	2	2	4	71	ENSBGRG00000004337(KCNH2),ENSBGRG00000022985(SCN4B)	ENSBGRG00000011476(KCNN2),ENSBGRG00000012965(SCN3B)	0.0341953	0.338356
BP	GO:0030316	osteoclast differentiation	3	1	4	71	ENSBGRG00000008094(KLF10),ENSBGRG00000009096(FOS),ENSBGRG00000011484(SFRP1)	ENSBGRG00000003633(TF)	0.0341953	0.338356
BP	GO:0034440	lipid oxidation	3	1	4	71	ENSBGRG00000017531(CRAT),ENSBGRG00000017727(ILVBL),ENSBGRG00000026412(ACADS)	ENSBGRG00000016397(CYP4V2)	0.0341953	0.338356
BP	GO:0002636	positive regulation of germinal center formation	1	0	1	2	ENSBGRG00000014023(ADA)	-	0.0342169	0.338356
BP	GO:0006597	spermine biosynthetic process	0	1	1	2	-	ENSBGRG00000010694(AMD1)	0.0342169	0.338356
BP	GO:0006600	creatine metabolic process	1	0	1	2	ENSBGRG00000015533(GAMT)	-	0.0342169	0.338356
BP	GO:0006601	creatine biosynthetic process	1	0	1	2	ENSBGRG00000015533(GAMT)	-	0.0342169	0.338356
BP	GO:0007079	mitotic chromosome movement towards spindle pole	1	0	1	2	ENSBGRG00000003703(CENPE)	-	0.0342169	0.338356
BP	GO:0008295	spermidine biosynthetic process	0	1	1	2	-	ENSBGRG00000010694(AMD1)	0.0342169	0.338356
BP	GO:0009820	alkaloid metabolic process	1	0	1	2	ENSBGRG00000010949(CYP2D6)	-	0.0342169	0.338356
BP	GO:0014735	regulation of muscle atrophy	1	0	1	2	ENSBGRG00000026269(MYOG)	-	0.0342169	0.338356
BP	GO:0014737	positive regulation of muscle atrophy	1	0	1	2	ENSBGRG00000026269(MYOG)	-	0.0342169	0.338356
BP	GO:0014891	striated muscle atrophy	1	0	1	2	ENSBGRG00000026269(MYOG)	-	0.0342169	0.338356
BP	GO:0015878	biotin transport	1	0	1	2	ENSBGRG00000025244(SLC27A1)	-	0.0342169	0.338356
BP	GO:0016243	regulation of autophagosome size	1	0	1	2	ENSBGRG00000002593(ATP13A2)	-	0.0342169	0.338356
BP	GO:0018197	peptidyl-aspartic acid modification	1	0	1	2	ENSBGRG00000002593(ATP13A2)	-	0.0342169	0.338356
BP	GO:0019254	carnitine metabolic process, CoA-linked	1	0	1	2	ENSBGRG00000017531(CRAT)	-	0.0342169	0.338356
BP	GO:0019682	glyceraldehyde-3-phosphate metabolic process	1	0	1	2	ENSBGRG00000021836(TPI1)	-	0.0342169	0.338356
BP	GO:0021934	hindbrain tangential cell migration	1	0	1	2	ENSBGRG00000024327(PLXNA2)	-	0.0342169	0.338356
BP	GO:0030505	inorganic diphosphate transport	0	1	1	2	-	ENSBGRG00000021648(ENPP1)	0.0342169	0.338356
BP	GO:0033563	dorsal/ventral axon guidance	1	0	1	2	ENSBGRG00000026122(SLIT1)	-	0.0342169	0.338356
BP	GO:0035781	CD86 biosynthetic process	1	0	1	2	ENSBGRG00000005603(TMEM106A)	-	0.0342169	0.338356
BP	GO:0042495	detection of triacyl bacterial lipopeptide	0	1	1	2	-	ENSBGRG00000017549(TLR2)	0.0342169	0.338356
BP	GO:0042496	detection of diacyl bacterial lipopeptide	0	1	1	2	-	ENSBGRG00000017549(TLR2)	0.0342169	0.338356
BP	GO:0043084	penile erection	1	0	1	2	ENSBGRG00000014023(ADA)	-	0.0342169	0.338356
BP	GO:0044343	canonical Wnt signaling pathway involved in regulation of type B pancreatic cell proliferation	1	0	1	2	ENSBGRG00000011484(SFRP1)	-	0.0342169	0.338356
BP	GO:0045578	negative regulation of B cell differentiation	1	0	1	2	ENSBGRG00000011484(SFRP1)	-	0.0342169	0.338356
BP	GO:0046060	dATP metabolic process	1	0	1	2	ENSBGRG00000014023(ADA)	-	0.0342169	0.338356
BP	GO:0046061	dATP catabolic process	1	0	1	2	ENSBGRG00000014023(ADA)	-	0.0342169	0.338356
BP	GO:0046166	glyceraldehyde-3-phosphate biosynthetic process	1	0	1	2	ENSBGRG00000021836(TPI1)	-	0.0342169	0.338356
BP	GO:0046544	development of secondary male sexual characteristics	0	1	1	2	-	ENSBGRG00000011219(LHCGR)	0.0342169	0.338356
BP	GO:0046946	hydroxylysine metabolic process	1	0	1	2	ENSBGRG00000025536(PLOD3)	-	0.0342169	0.338356
BP	GO:0046947	hydroxylysine biosynthetic process	1	0	1	2	ENSBGRG00000025536(PLOD3)	-	0.0342169	0.338356
BP	GO:0048210	Golgi vesicle fusion to target membrane	1	0	1	2	ENSBGRG00000007004(NKD2)	-	0.0342169	0.338356
BP	GO:0048389	intermediate mesoderm development	1	0	1	2	ENSBGRG00000021840(OSR1)	-	0.0342169	0.338356
BP	GO:0060160	negative regulation of dopamine receptor signaling pathway	1	0	1	2	ENSBGRG00000005972(PALM)	-	0.0342169	0.338356
BP	GO:0061227	pattern specification involved in mesonephros development	1	0	1	2	ENSBGRG00000021840(OSR1)	-	0.0342169	0.338356
BP	GO:0070256	negative regulation of mucus secretion	1	0	1	2	ENSBGRG00000014023(ADA)	-	0.0342169	0.338356
BP	GO:0072071	kidney interstitial fibroblast differentiation	1	0	1	2	ENSBGRG00000021840(OSR1)	-	0.0342169	0.338356
BP	GO:0072098	anterior/posterior pattern specification involved in kidney development	1	0	1	2	ENSBGRG00000021840(OSR1)	-	0.0342169	0.338356
BP	GO:0072141	renal interstitial fibroblast development	1	0	1	2	ENSBGRG00000021840(OSR1)	-	0.0342169	0.338356
BP	GO:0072162	metanephric mesenchymal cell differentiation	1	0	1	2	ENSBGRG00000021840(OSR1)	-	0.0342169	0.338356
BP	GO:0072208	metanephric smooth muscle tissue development	1	0	1	2	ENSBGRG00000021840(OSR1)	-	0.0342169	0.338356
BP	GO:0089700	protein kinase D signaling	1	0	1	2	ENSBGRG00000017664(PRKD2)	-	0.0342169	0.338356
BP	GO:0090244	Wnt signaling pathway involved in somitogenesis	1	0	1	2	ENSBGRG00000011484(SFRP1)	-	0.0342169	0.338356
BP	GO:0090345	cellular organohalogen metabolic process	1	0	1	2	ENSBGRG00000010949(CYP2D6)	-	0.0342169	0.338356
BP	GO:0090346	cellular organofluorine metabolic process	1	0	1	2	ENSBGRG00000010949(CYP2D6)	-	0.0342169	0.338356
BP	GO:0098914	membrane repolarization during atrial cardiac muscle cell action potential	0	1	1	2	-	ENSBGRG00000011476(KCNN2)	0.0342169	0.338356
BP	GO:0099607	lateral attachment of mitotic spindle microtubules to kinetochore	1	0	1	2	ENSBGRG00000003703(CENPE)	-	0.0342169	0.338356
BP	GO:0120182	regulation of focal adhesion disassembly	1	0	1	2	ENSBGRG00000017840(ARF6)	-	0.0342169	0.338356
BP	GO:0120183	positive regulation of focal adhesion disassembly	1	0	1	2	ENSBGRG00000017840(ARF6)	-	0.0342169	0.338356
BP	GO:1901383	negative regulation of chorionic trophoblast cell proliferation	0	1	1	2	-	ENSBGRG00000009051(ACVR1C)	0.0342169	0.338356
BP	GO:1902217	erythrocyte apoptotic process	1	0	1	2	ENSBGRG00000017840(ARF6)	-	0.0342169	0.338356
BP	GO:1904466	positive regulation of matrix metallopeptidase secretion	0	1	1	2	-	ENSBGRG00000017549(TLR2)	0.0342169	0.338356
BP	GO:1904956	regulation of midbrain dopaminergic neuron differentiation	1	0	1	2	ENSBGRG00000011484(SFRP1)	-	0.0342169	0.338356
BP	GO:1905123	regulation of glucosylceramidase activity	1	0	1	2	ENSBGRG00000002593(ATP13A2)	-	0.0342169	0.338356
BP	GO:1905135	biotin import across plasma membrane	1	0	1	2	ENSBGRG00000025244(SLC27A1)	-	0.0342169	0.338356
BP	GO:1905407	regulation of creatine transmembrane transporter activity	1	0	1	2	ENSBGRG00000021840(OSR1)	-	0.0342169	0.338356
BP	GO:1905408	negative regulation of creatine transmembrane transporter activity	1	0	1	2	ENSBGRG00000021840(OSR1)	-	0.0342169	0.338356
BP	GO:2000040	regulation of planar cell polarity pathway involved in axis elongation	1	0	1	2	ENSBGRG00000011484(SFRP1)	-	0.0342169	0.338356
BP	GO:2000041	negative regulation of planar cell polarity pathway involved in axis elongation	1	0	1	2	ENSBGRG00000011484(SFRP1)	-	0.0342169	0.338356
BP	GO:2000079	regulation of canonical Wnt signaling pathway involved in controlling type B pancreatic cell proliferation	1	0	1	2	ENSBGRG00000011484(SFRP1)	-	0.0342169	0.338356
BP	GO:1903532	positive regulation of secretion by cell	4	2	6	141	ENSBGRG00000002593(ATP13A2),ENSBGRG00000017840(ARF6),ENSBGRG00000019591(NLGN2),ENSBGRG00000025051(SCAMP5)	ENSBGRG00000012363(SDC4),ENSBGRG00000017549(TLR2)	0.0354951	0.348587
BP	GO:0030199	collagen fibril organization	3	0	3	42	ENSBGRG00000017761(PXDN),ENSBGRG00000022881(SERPINH1),ENSBGRG00000025536(PLOD3)	-	0.0355594	0.348587
BP	GO:1990778	protein localization to cell periphery	6	2	8	218	ENSBGRG00000005972(PALM),ENSBGRG00000007004(NKD2),ENSBGRG00000010087(NSG1),ENSBGRG00000011023(TMEM88),ENSBGRG00000017840(ARF6),ENSBGRG00000021195(LAMA5)	ENSBGRG00000012778(CDH1),ENSBGRG00000012965(SCN3B)	0.0355617	0.348587
BP	GO:0008585	female gonad development	1	3	4	72	ENSBGRG00000011484(SFRP1)	ENSBGRG00000011219(LHCGR),ENSBGRG00000016750(TIPARP),ENSBGRG00000025786(ARID5B)	0.0357343	0.349264
BP	GO:0008285	negative regulation of cell population proliferation	7	6	13	430	ENSBGRG00000002480(SOX7),ENSBGRG00000003011(PODN),ENSBGRG00000011484(SFRP1),ENSBGRG00000017288(ADGRG1),ENSBGRG00000024826(NACC2),ENSBGRG00000026269(MYOG),ENSBGRG00000026320(BTG2)	ENSBGRG00000002139,ENSBGRG00000004102(STK3),ENSBGRG00000009051(ACVR1C),ENSBGRG00000012363(SDC4),ENSBGRG00000014262(PPARGC1A),ENSBGRG00000015268(PTPRK)	0.0359367	0.350227
BP	GO:0008016	regulation of heart contraction	3	2	5	106	ENSBGRG00000004337(KCNH2),ENSBGRG00000014023(ADA),ENSBGRG00000022985(SCN4B)	ENSBGRG00000011476(KCNN2),ENSBGRG00000012965(SCN3B)	0.0365155	0.353134
BP	GO:0008406	gonad development	3	3	6	142	ENSBGRG00000011484(SFRP1),ENSBGRG00000017288(ADGRG1),ENSBGRG00000021840(OSR1)	ENSBGRG00000011219(LHCGR),ENSBGRG00000016750(TIPARP),ENSBGRG00000025786(ARID5B)	0.0365492	0.353134
BP	GO:0050708	regulation of protein secretion	4	2	6	142	ENSBGRG00000002593(ATP13A2),ENSBGRG00000011484(SFRP1),ENSBGRG00000017840(ARF6),ENSBGRG00000019591(NLGN2)	ENSBGRG00000009051(ACVR1C),ENSBGRG00000017549(TLR2)	0.0365492	0.353134
BP	GO:0044344	cellular response to fibroblast growth factor stimulus	3	1	4	73	ENSBGRG00000000523(NR4A1),ENSBGRG00000011484(SFRP1),ENSBGRG00000017664(PRKD2)	ENSBGRG00000003576(KLB)	0.0373128	0.354387
BP	GO:0050714	positive regulation of protein secretion	3	1	4	73	ENSBGRG00000002593(ATP13A2),ENSBGRG00000017840(ARF6),ENSBGRG00000019591(NLGN2)	ENSBGRG00000017549(TLR2)	0.0373128	0.354387
BP	GO:0071774	response to fibroblast growth factor	3	1	4	73	ENSBGRG00000000523(NR4A1),ENSBGRG00000011484(SFRP1),ENSBGRG00000017664(PRKD2)	ENSBGRG00000003576(KLB)	0.0373128	0.354387
BP	GO:0070887	cellular response to chemical stimulus	26	14	40	1750	ENSBGRG00000000313(CCN1),ENSBGRG00000000523(NR4A1),ENSBGRG00000002593(ATP13A2),ENSBGRG00000002916(GPD1),ENSBGRG00000004337(KCNH2),ENSBGRG00000004437(COL4A1),ENSBGRG00000005083(COL4A2),ENSBGRG00000005366(CDC34),ENSBGRG00000005972(PALM),ENSBGRG00000006266(S100A14),ENSBGRG00000007264(TNFSF4),ENSBGRG00000009096(FOS),ENSBGRG00000010087(NSG1),ENSBGRG00000010949(CYP2D6),ENSBGRG00000011484(SFRP1),ENSBGRG…	ENSBGRG00000003576(KLB),ENSBGRG00000003633(TF),ENSBGRG00000007139(KLHL15),ENSBGRG00000008695(PBLD),ENSBGRG00000011219(LHCGR),ENSBGRG00000012579(FOXO1),ENSBGRG00000012778(CDH1),ENSBGRG00000014262(PPARGC1A),ENSBGRG00000015268(PTPRK),ENSBGRG00000016687(PIGBOS1),ENSBGRG00000016750(TIPARP),ENSBGRG00000017549(TLR2),ENSBGRG00000021648(ENPP1),ENSBGRG00000025786(ARID5B)	0.0373224	0.354387
BP	GO:0070482	response to oxygen levels	5	1	6	143	ENSBGRG00000011484(SFRP1),ENSBGRG00000012014(ENO1),ENSBGRG00000014023(ADA),ENSBGRG00000014092(SOD3),ENSBGRG00000014778(PGK1)	ENSBGRG00000012579(FOXO1)	0.0376231	0.354387
BP	GO:0034394	protein localization to cell surface	2	1	3	43	ENSBGRG00000017840(ARF6),ENSBGRG00000019591(NLGN2)	ENSBGRG00000015268(PTPRK)	0.0377541	0.354387
BP	GO:0097306	cellular response to alcohol	2	1	3	43	ENSBGRG00000007264(TNFSF4),ENSBGRG00000011484(SFRP1)	ENSBGRG00000012778(CDH1)	0.0377541	0.354387
BP	GO:1903317	regulation of protein maturation	2	1	3	43	ENSBGRG00000007004(NKD2),ENSBGRG00000012014(ENO1)	ENSBGRG00000007270(NLRC4)	0.0377541	0.354387
BP	GO:0015012	heparan sulfate proteoglycan biosynthetic process	1	1	2	18	ENSBGRG00000006039(XYLT2)	ENSBGRG00000020997(GLCE)	0.037835	0.354387
BP	GO:0050857	positive regulation of antigen receptor-mediated signaling pathway	2	0	2	18	ENSBGRG00000014023(ADA),ENSBGRG00000017664(PRKD2)	-	0.037835	0.354387
BP	GO:0098581	detection of external biotic stimulus	0	2	2	18	-	ENSBGRG00000007270(NLRC4),ENSBGRG00000017549(TLR2)	0.037835	0.354387
BP	GO:1901362	organic cyclic compound biosynthetic process	35	25	60	2807	ENSBGRG00000000313(CCN1),ENSBGRG00000000523(NR4A1),ENSBGRG00000001124(PPOX),ENSBGRG00000001755,ENSBGRG00000002480(SOX7),ENSBGRG00000003738(CC2D1B),ENSBGRG00000004337(KCNH2),ENSBGRG00000005083(COL4A2),ENSBGRG00000005144(MOCS3),ENSBGRG00000006582(L3MBTL2),ENSBGRG00000008094(KLF10),ENSBGRG00000008923(PTGES2),ENSBGRG00000009096(FOS),ENSBGRG00000011484(SFRP1),ENSBGRG00000012014(ENO1),ENSBGRG0000001206…	ENSBGRG00000001029(GTF3C3),ENSBGRG00000001610(GABPB2),ENSBGRG00000002918(PFDN5),ENSBGRG00000003232(LRIF1),ENSBGRG00000003528(WDR75),ENSBGRG00000003542(PRIM1),ENSBGRG00000003633(TF),ENSBGRG00000004102(STK3),ENSBGRG00000007270(NLRC4),ENSBGRG00000007410(NAMPT),ENSBGRG00000011219(LHCGR),ENSBGRG00000012579(FOXO1),ENSBGRG00000012778(CDH1),ENSBGRG00000013181(TAF9),ENSBGRG00000014262(PPARGC1A),ENSBGRG000…	0.0382964	0.357716
BP	GO:0046545	development of primary female sexual characteristics	1	3	4	74	ENSBGRG00000011484(SFRP1)	ENSBGRG00000011219(LHCGR),ENSBGRG00000016750(TIPARP),ENSBGRG00000025786(ARID5B)	0.038931	0.361234
BP	GO:0030258	lipid modification	4	2	6	145	ENSBGRG00000009666(PIK3C2B),ENSBGRG00000017531(CRAT),ENSBGRG00000017727(ILVBL),ENSBGRG00000026412(ACADS)	ENSBGRG00000009254(PIK3C2A),ENSBGRG00000016397(CYP4V2)	0.039831	0.361234
BP	GO:0032757	positive regulation of interleukin-8 production	2	1	3	44	ENSBGRG00000017664(PRKD2),ENSBGRG00000018040(CD14)	ENSBGRG00000017549(TLR2)	0.0400166	0.361234
BP	GO:0043065	positive regulation of apoptotic process	7	4	11	351	ENSBGRG00000000313(CCN1),ENSBGRG00000000523(NR4A1),ENSBGRG00000002480(SOX7),ENSBGRG00000006355(OLFM1),ENSBGRG00000011484(SFRP1),ENSBGRG00000013936(MYBBP1A),ENSBGRG00000024826(NACC2)	ENSBGRG00000004102(STK3),ENSBGRG00000007270(NLRC4),ENSBGRG00000009051(ACVR1C),ENSBGRG00000012579(FOXO1)	0.0413836	0.361234
BP	GO:0030336	negative regulation of cell migration	4	3	7	185	ENSBGRG00000003011(PODN),ENSBGRG00000011484(SFRP1),ENSBGRG00000014023(ADA),ENSBGRG00000017288(ADGRG1)	ENSBGRG00000009051(ACVR1C),ENSBGRG00000012778(CDH1),ENSBGRG00000015268(PTPRK)	0.0415442	0.361234
BP	GO:0031639	plasminogen activation	2	0	2	19	ENSBGRG00000012014(ENO1),ENSBGRG00000014778(PGK1)	-	0.0418147	0.361234
BP	GO:0055069	zinc ion homeostasis	2	0	2	19	ENSBGRG00000002593(ATP13A2),ENSBGRG00000015838(TMC8)	-	0.0418147	0.361234
BP	GO:0086005	ventricular cardiac muscle cell action potential	1	1	2	19	ENSBGRG00000004337(KCNH2)	ENSBGRG00000012965(SCN3B)	0.0418147	0.361234
BP	GO:1901070	guanosine-containing compound biosynthetic process	2	0	2	19	ENSBGRG00000014023(ADA),ENSBGRG00000026159(NME3)	-	0.0418147	0.361234
BP	GO:2001024	negative regulation of response to drug	2	0	2	19	ENSBGRG00000005972(PALM),ENSBGRG00000021840(OSR1)	-	0.0418147	0.361234
BP	GO:0003006	developmental process involved in reproduction	11	5	16	577	ENSBGRG00000000313(CCN1),ENSBGRG00000009080(PYGO2),ENSBGRG00000011484(SFRP1),ENSBGRG00000014023(ADA),ENSBGRG00000014538(PABPC1L),ENSBGRG00000015533(GAMT),ENSBGRG00000017288(ADGRG1),ENSBGRG00000019094(SPATA25),ENSBGRG00000020110(AXL),ENSBGRG00000020214(CBX2),ENSBGRG00000021840(OSR1)	ENSBGRG00000004102(STK3),ENSBGRG00000006896(TRIP13),ENSBGRG00000011219(LHCGR),ENSBGRG00000016750(TIPARP),ENSBGRG00000025786(ARID5B)	0.0421498	0.361234
BP	GO:0043280	positive regulation of cysteine-type endopeptidase activity involved in apoptotic process	2	2	4	76	ENSBGRG00000000313(CCN1),ENSBGRG00000002480(SOX7)	ENSBGRG00000007270(NLRC4),ENSBGRG00000009051(ACVR1C)	0.0422861	0.361234
BP	GO:0045600	positive regulation of fat cell differentiation	2	1	3	45	ENSBGRG00000007772(METRNL),ENSBGRG00000011484(SFRP1)	ENSBGRG00000004102(STK3)	0.0423464	0.361234
BP	GO:0060760	positive regulation of response to cytokine stimulus	1	2	3	45	ENSBGRG00000020110(AXL)	ENSBGRG00000013181(TAF9),ENSBGRG00000017549(TLR2)	0.0423464	0.361234
BP	GO:0009152	purine ribonucleotide biosynthetic process	4	1	5	111	ENSBGRG00000001755,ENSBGRG00000012014(ENO1),ENSBGRG00000014023(ADA),ENSBGRG00000026159(NME3)	ENSBGRG00000014262(PPARGC1A)	0.0431523	0.361234
BP	GO:0110148	biomineralization	4	1	5	111	ENSBGRG00000000313(CCN1),ENSBGRG00000008094(KLF10),ENSBGRG00000014023(ADA),ENSBGRG00000021840(OSR1)	ENSBGRG00000021648(ENPP1)	0.0431523	0.361234
BP	GO:0016054	organic acid catabolic process	6	0	6	148	ENSBGRG00000003404(ALDH4A1),ENSBGRG00000017531(CRAT),ENSBGRG00000017727(ILVBL),ENSBGRG00000019059(BCKDHA),ENSBGRG00000026412(ACADS),ENSBGRG00000026875(ACSF3)	-	0.0432944	0.361234
BP	GO:0046395	carboxylic acid catabolic process	6	0	6	148	ENSBGRG00000003404(ALDH4A1),ENSBGRG00000017531(CRAT),ENSBGRG00000017727(ILVBL),ENSBGRG00000019059(BCKDHA),ENSBGRG00000026412(ACADS),ENSBGRG00000026875(ACSF3)	-	0.0432944	0.361234
BP	GO:0009891	positive regulation of biosynthetic process	21	10	31	1310	ENSBGRG00000000313(CCN1),ENSBGRG00000000523(NR4A1),ENSBGRG00000002480(SOX7),ENSBGRG00000004337(KCNH2),ENSBGRG00000005603(TMEM106A),ENSBGRG00000008094(KLF10),ENSBGRG00000008923(PTGES2),ENSBGRG00000009096(FOS),ENSBGRG00000011484(SFRP1),ENSBGRG00000012014(ENO1),ENSBGRG00000012066(EBF3),ENSBGRG00000012849(SLC45A3),ENSBGRG00000013574(PKM),ENSBGRG00000013936(MYBBP1A),ENSBGRG00000015957(GLIS2),ENSBGRG00…	ENSBGRG00000001610(GABPB2),ENSBGRG00000003528(WDR75),ENSBGRG00000003633(TF),ENSBGRG00000007410(NAMPT),ENSBGRG00000011219(LHCGR),ENSBGRG00000012579(FOXO1),ENSBGRG00000012778(CDH1),ENSBGRG00000013181(TAF9),ENSBGRG00000014262(PPARGC1A),ENSBGRG00000018410(NR6A1)	0.0435318	0.361234
BP	GO:1905114	cell surface receptor signaling pathway involved in cell-cell signaling	7	3	10	311	ENSBGRG00000002480(SOX7),ENSBGRG00000007004(NKD2),ENSBGRG00000007368(FAM53B),ENSBGRG00000009080(PYGO2),ENSBGRG00000011023(TMEM88),ENSBGRG00000011484(SFRP1),ENSBGRG00000019591(NLGN2)	ENSBGRG00000002918(PFDN5),ENSBGRG00000004102(STK3),ENSBGRG00000017549(TLR2)	0.043693	0.361234
BP	GO:0001944	vasculature development	13	1	14	488	ENSBGRG00000000313(CCN1),ENSBGRG00000000523(NR4A1),ENSBGRG00000004437(COL4A1),ENSBGRG00000005083(COL4A2),ENSBGRG00000013574(PKM),ENSBGRG00000014778(PGK1),ENSBGRG00000015317(MCAM),ENSBGRG00000017288(ADGRG1),ENSBGRG00000017664(PRKD2),ENSBGRG00000017761(PXDN),ENSBGRG00000021840(OSR1),ENSBGRG00000021903(ROBO4),ENSBGRG00000025096(ANGPTL4)	ENSBGRG00000016750(TIPARP)	0.0437513	0.361234
BP	GO:0072358	cardiovascular system development	13	1	14	488	ENSBGRG00000000313(CCN1),ENSBGRG00000000523(NR4A1),ENSBGRG00000004437(COL4A1),ENSBGRG00000005083(COL4A2),ENSBGRG00000013574(PKM),ENSBGRG00000014778(PGK1),ENSBGRG00000015317(MCAM),ENSBGRG00000017288(ADGRG1),ENSBGRG00000017664(PRKD2),ENSBGRG00000017761(PXDN),ENSBGRG00000021840(OSR1),ENSBGRG00000021903(ROBO4),ENSBGRG00000025096(ANGPTL4)	ENSBGRG00000016750(TIPARP)	0.0437513	0.361234
BP	GO:0006109	regulation of carbohydrate metabolic process	2	3	5	112	ENSBGRG00000002916(GPD1),ENSBGRG00000012849(SLC45A3)	ENSBGRG00000011219(LHCGR),ENSBGRG00000012579(FOXO1),ENSBGRG00000021648(ENPP1)	0.0445611	0.361234
BP	GO:0007623	circadian rhythm	2	3	5	112	ENSBGRG00000008094(KLF10),ENSBGRG00000024506(NR2F6)	ENSBGRG00000007410(NAMPT),ENSBGRG00000014262(PPARGC1A),ENSBGRG00000021547(FBXL3)	0.0445611	0.361234
BP	GO:0045670	regulation of osteoclast differentiation	3	0	3	46	ENSBGRG00000008094(KLF10),ENSBGRG00000009096(FOS),ENSBGRG00000011484(SFRP1)	-	0.0447428	0.361234
BP	GO:0043068	positive regulation of programmed cell death	7	4	11	356	ENSBGRG00000000313(CCN1),ENSBGRG00000000523(NR4A1),ENSBGRG00000002480(SOX7),ENSBGRG00000006355(OLFM1),ENSBGRG00000011484(SFRP1),ENSBGRG00000013936(MYBBP1A),ENSBGRG00000024826(NACC2)	ENSBGRG00000004102(STK3),ENSBGRG00000007270(NLRC4),ENSBGRG00000009051(ACVR1C),ENSBGRG00000012579(FOXO1)	0.0450274	0.361234
BP	GO:0032355	response to estradiol	2	0	2	20	ENSBGRG00000011484(SFRP1),ENSBGRG00000026269(MYOG)	-	0.0459435	0.361234
BP	GO:0035767	endothelial cell chemotaxis	2	0	2	20	ENSBGRG00000000523(NR4A1),ENSBGRG00000017664(PRKD2)	-	0.0459435	0.361234
BP	GO:0090278	negative regulation of peptide hormone secretion	1	1	2	20	ENSBGRG00000011484(SFRP1)	ENSBGRG00000009051(ACVR1C)	0.0459435	0.361234
BP	GO:0051047	positive regulation of secretion	4	2	6	151	ENSBGRG00000002593(ATP13A2),ENSBGRG00000017840(ARF6),ENSBGRG00000019591(NLGN2),ENSBGRG00000025051(SCAMP5)	ENSBGRG00000012363(SDC4),ENSBGRG00000017549(TLR2)	0.0469415	0.361234
BP	GO:0071495	cellular response to endogenous stimulus	14	6	20	776	ENSBGRG00000000313(CCN1),ENSBGRG00000000523(NR4A1),ENSBGRG00000002916(GPD1),ENSBGRG00000004437(COL4A1),ENSBGRG00000005083(COL4A2),ENSBGRG00000005972(PALM),ENSBGRG00000007264(TNFSF4),ENSBGRG00000009096(FOS),ENSBGRG00000010087(NSG1),ENSBGRG00000011484(SFRP1),ENSBGRG00000017664(PRKD2),ENSBGRG00000025244(SLC27A1),ENSBGRG00000025584(CILP),ENSBGRG00000026269(MYOG)	ENSBGRG00000003576(KLB),ENSBGRG00000008695(PBLD),ENSBGRG00000011219(LHCGR),ENSBGRG00000012778(CDH1),ENSBGRG00000015268(PTPRK),ENSBGRG00000021648(ENPP1)	0.0475144	0.361234
BP	GO:0071417	cellular response to organonitrogen compound	7	3	10	316	ENSBGRG00000000523(NR4A1),ENSBGRG00000002916(GPD1),ENSBGRG00000004437(COL4A1),ENSBGRG00000005972(PALM),ENSBGRG00000010087(NSG1),ENSBGRG00000011484(SFRP1),ENSBGRG00000025244(SLC27A1)	ENSBGRG00000011219(LHCGR),ENSBGRG00000012778(CDH1),ENSBGRG00000021648(ENPP1)	0.0477576	0.361234
BP	GO:0007167	enzyme linked receptor protein signaling pathway	9	8	17	634	ENSBGRG00000000313(CCN1),ENSBGRG00000004437(COL4A1),ENSBGRG00000005083(COL4A2),ENSBGRG00000009096(FOS),ENSBGRG00000011484(SFRP1),ENSBGRG00000017664(PRKD2),ENSBGRG00000020110(AXL),ENSBGRG00000025584(CILP),ENSBGRG00000026091(MVP)	ENSBGRG00000003576(KLB),ENSBGRG00000003633(TF),ENSBGRG00000008695(PBLD),ENSBGRG00000009051(ACVR1C),ENSBGRG00000015268(PTPRK),ENSBGRG00000016750(TIPARP),ENSBGRG00000021648(ENPP1),ENSBGRG00000025786(ARID5B)	0.0479835	0.361234
BP	GO:0016310	phosphorylation	22	13	35	1527	ENSBGRG00000000313(CCN1),ENSBGRG00000002593(ATP13A2),ENSBGRG00000002916(GPD1),ENSBGRG00000003703(CENPE),ENSBGRG00000005603(TMEM106A),ENSBGRG00000007584(PRAG1),ENSBGRG00000009666(PIK3C2B),ENSBGRG00000011484(SFRP1),ENSBGRG00000012014(ENO1),ENSBGRG00000013574(PKM),ENSBGRG00000014778(PGK1),ENSBGRG00000017664(PRKD2),ENSBGRG00000020110(AXL),ENSBGRG00000020354(DUSP29),ENSBGRG00000021836(TPI1),ENSBGRG000…	ENSBGRG00000003576(KLB),ENSBGRG00000003633(TF),ENSBGRG00000004102(STK3),ENSBGRG00000009051(ACVR1C),ENSBGRG00000009254(PIK3C2A),ENSBGRG00000011354(BMX),ENSBGRG00000012579(FOXO1),ENSBGRG00000013181(TAF9),ENSBGRG00000014062(ABI1),ENSBGRG00000017549(TLR2),ENSBGRG00000019004(CDKL1),ENSBGRG00000020150(ULK4),ENSBGRG00000021648(ENPP1)	0.0486131	0.361234
BP	GO:0071453	cellular response to oxygen levels	3	1	4	80	ENSBGRG00000011484(SFRP1),ENSBGRG00000012014(ENO1),ENSBGRG00000014778(PGK1)	ENSBGRG00000012579(FOXO1)	0.0494714	0.361234
BP	GO:0018130	heterocycle biosynthetic process	34	24	58	2742	ENSBGRG00000000313(CCN1),ENSBGRG00000000523(NR4A1),ENSBGRG00000001124(PPOX),ENSBGRG00000001755,ENSBGRG00000002480(SOX7),ENSBGRG00000003738(CC2D1B),ENSBGRG00000004337(KCNH2),ENSBGRG00000005083(COL4A2),ENSBGRG00000005144(MOCS3),ENSBGRG00000006582(L3MBTL2),ENSBGRG00000008094(KLF10),ENSBGRG00000008923(PTGES2),ENSBGRG00000009096(FOS),ENSBGRG00000011484(SFRP1),ENSBGRG00000012014(ENO1),ENSBGRG0000001206…	ENSBGRG00000001029(GTF3C3),ENSBGRG00000001610(GABPB2),ENSBGRG00000002918(PFDN5),ENSBGRG00000003232(LRIF1),ENSBGRG00000003528(WDR75),ENSBGRG00000003542(PRIM1),ENSBGRG00000003633(TF),ENSBGRG00000004102(STK3),ENSBGRG00000007270(NLRC4),ENSBGRG00000007410(NAMPT),ENSBGRG00000012579(FOXO1),ENSBGRG00000012778(CDH1),ENSBGRG00000013181(TAF9),ENSBGRG00000014262(PPARGC1A),ENSBGRG00000015268(PTPRK),ENSBGRG000…	0.0497177	0.361234
BP	GO:0006493	protein O-linked glycosylation	2	1	3	48	ENSBGRG00000002161(POMGNT1),ENSBGRG00000025536(PLOD3)	ENSBGRG00000019923(GCNT1)	0.0497333	0.361234
BP	GO:0045921	positive regulation of exocytosis	2	1	3	48	ENSBGRG00000002593(ATP13A2),ENSBGRG00000025051(SCAMP5)	ENSBGRG00000012363(SDC4)	0.0497333	0.361234
CC	GO:0035102	PRC1 complex	4	0	4	12	ENSBGRG00000017122(PHC2),ENSBGRG00000020214(CBX2),ENSBGRG00000020275(CBX8),ENSBGRG00000020445(CBX4)	-	2.96348e-05	0.0112316
CC	GO:0009986	cell surface	12	6	18	425	ENSBGRG00000001765(DIP2A),ENSBGRG00000004337(KCNH2),ENSBGRG00000006986(CD93),ENSBGRG00000007264(TNFSF4),ENSBGRG00000011484(SFRP1),ENSBGRG00000012014(ENO1),ENSBGRG00000014023(ADA),ENSBGRG00000015317(MCAM),ENSBGRG00000017761(PXDN),ENSBGRG00000018040(CD14),ENSBGRG00000019591(NLGN2),ENSBGRG00000020110(AXL)	ENSBGRG00000003633(TF),ENSBGRG00000008888(CDH17),ENSBGRG00000012363(SDC4),ENSBGRG00000015268(PTPRK),ENSBGRG00000017549(TLR2),ENSBGRG00000021648(ENPP1)	0.000184853	0.0350296
CC	GO:0062023	collagen-containing extracellular matrix	9	0	9	133	ENSBGRG00000004437(COL4A1),ENSBGRG00000005083(COL4A2),ENSBGRG00000011484(SFRP1),ENSBGRG00000014092(SOD3),ENSBGRG00000017761(PXDN),ENSBGRG00000020183(COL15A1),ENSBGRG00000021195(LAMA5),ENSBGRG00000025536(PLOD3),ENSBGRG00000025584(CILP)	-	0.000304983	0.0385295
CC	GO:0031012	extracellular matrix	10	0	10	204	ENSBGRG00000002127(OLFML2B),ENSBGRG00000004437(COL4A1),ENSBGRG00000005083(COL4A2),ENSBGRG00000011484(SFRP1),ENSBGRG00000014092(SOD3),ENSBGRG00000017761(PXDN),ENSBGRG00000020183(COL15A1),ENSBGRG00000021195(LAMA5),ENSBGRG00000025536(PLOD3),ENSBGRG00000025584(CILP)	-	0.00177646	0.151764
CC	GO:0000152	nuclear ubiquitin ligase complex	4	0	4	35	ENSBGRG00000017122(PHC2),ENSBGRG00000020214(CBX2),ENSBGRG00000020275(CBX8),ENSBGRG00000020445(CBX4)	-	0.00234375	0.151764
CC	GO:0005604	basement membrane	5	0	5	58	ENSBGRG00000004437(COL4A1),ENSBGRG00000005083(COL4A2),ENSBGRG00000017761(PXDN),ENSBGRG00000020183(COL15A1),ENSBGRG00000021195(LAMA5)	-	0.0024026	0.151764
CC	GO:0005587	collagen type IV trimer	2	0	2	6	ENSBGRG00000004437(COL4A1),ENSBGRG00000005083(COL4A2)	-	0.00373647	0.16179
CC	GO:0098651	basement membrane collagen trimer	2	0	2	6	ENSBGRG00000004437(COL4A1),ENSBGRG00000005083(COL4A2)	-	0.00373647	0.16179
CC	GO:0031519	PcG protein complex	4	0	4	40	ENSBGRG00000017122(PHC2),ENSBGRG00000020214(CBX2),ENSBGRG00000020275(CBX8),ENSBGRG00000020445(CBX4)	-	0.00384199	0.16179
CC	GO:0098642	network-forming collagen trimer	2	0	2	7	ENSBGRG00000004437(COL4A1),ENSBGRG00000005083(COL4A2)	-	0.00517553	0.17832
CC	GO:0098645	collagen network	2	0	2	7	ENSBGRG00000004437(COL4A1),ENSBGRG00000005083(COL4A2)	-	0.00517553	0.17832
CC	GO:1905103	integral component of lysosomal membrane	2	0	2	8	ENSBGRG00000002593(ATP13A2),ENSBGRG00000020060(TMEM175)	-	0.00682754	0.204199
CC	GO:0043231	intracellular membrane-bounded organelle	82	39	121	6384	ENSBGRG00000000257(SLX9),ENSBGRG00000000523(NR4A1),ENSBGRG00000001080(ELAPOR1),ENSBGRG00000001124(PPOX),ENSBGRG00000001755,ENSBGRG00000002161(POMGNT1),ENSBGRG00000002480(SOX7),ENSBGRG00000002593(ATP13A2),ENSBGRG00000003404(ALDH4A1),ENSBGRG00000003703(CENPE),ENSBGRG00000003738(CC2D1B),ENSBGRG00000005366(CDC34),ENSBGRG00000005972(PALM),ENSBGRG00000006341(NRDE2),ENSBGRG00000006582(L3MBTL2),ENSBGRG00…	ENSBGRG00000001029(GTF3C3),ENSBGRG00000001610(GABPB2),ENSBGRG00000002355(NIFK),ENSBGRG00000003232(LRIF1),ENSBGRG00000003528(WDR75),ENSBGRG00000003542(PRIM1),ENSBGRG00000004102(STK3),ENSBGRG00000004390(IQCB1),ENSBGRG00000005859(TADA1),ENSBGRG00000006896(TRIP13),ENSBGRG00000007139(KLHL15),ENSBGRG00000007270(NLRC4),ENSBGRG00000007410(NAMPT),ENSBGRG00000007957(PLCH1),ENSBGRG00000008888(CDH17),ENSBGRG…	0.00700419	0.204199
CC	GO:0031166	integral component of vacuolar membrane	2	0	2	9	ENSBGRG00000002593(ATP13A2),ENSBGRG00000020060(TMEM175)	-	0.00868532	0.219449
CC	GO:0031310	intrinsic component of vacuolar membrane	2	0	2	9	ENSBGRG00000002593(ATP13A2),ENSBGRG00000020060(TMEM175)	-	0.00868532	0.219449
CC	GO:0031527	filopodium membrane	2	0	2	10	ENSBGRG00000005972(PALM),ENSBGRG00000017840(ARF6)	-	0.0107418	0.235617
CC	GO:0043227	membrane-bounded organelle	87	41	128	6905	ENSBGRG00000000257(SLX9),ENSBGRG00000000523(NR4A1),ENSBGRG00000001080(ELAPOR1),ENSBGRG00000001124(PPOX),ENSBGRG00000001755,ENSBGRG00000002161(POMGNT1),ENSBGRG00000002480(SOX7),ENSBGRG00000002593(ATP13A2),ENSBGRG00000003404(ALDH4A1),ENSBGRG00000003703(CENPE),ENSBGRG00000003738(CC2D1B),ENSBGRG00000005366(CDC34),ENSBGRG00000005972(PALM),ENSBGRG00000006341(NRDE2),ENSBGRG00000006582(L3MBTL2),ENSBGRG00…	ENSBGRG00000001029(GTF3C3),ENSBGRG00000001610(GABPB2),ENSBGRG00000002355(NIFK),ENSBGRG00000003232(LRIF1),ENSBGRG00000003528(WDR75),ENSBGRG00000003542(PRIM1),ENSBGRG00000003633(TF),ENSBGRG00000004102(STK3),ENSBGRG00000004390(IQCB1),ENSBGRG00000005859(TADA1),ENSBGRG00000006896(TRIP13),ENSBGRG00000007139(KLHL15),ENSBGRG00000007270(NLRC4),ENSBGRG00000007410(NAMPT),ENSBGRG00000007957(PLCH1),ENSBGRG000…	0.0115031	0.235617
CC	GO:0005615	extracellular space	15	2	17	573	ENSBGRG00000003011(PODN),ENSBGRG00000006039(XYLT2),ENSBGRG00000007264(TNFSF4),ENSBGRG00000011484(SFRP1),ENSBGRG00000014092(SOD3),ENSBGRG00000014778(PGK1),ENSBGRG00000017761(PXDN),ENSBGRG00000020110(AXL),ENSBGRG00000021195(LAMA5),ENSBGRG00000022881(SERPINH1),ENSBGRG00000025096(ANGPTL4),ENSBGRG00000025536(PLOD3),ENSBGRG00000025584(CILP),ENSBGRG00000025901(RNPEP),ENSBGRG00000026122(SLIT1)	ENSBGRG00000003633(TF),ENSBGRG00000021648(ENPP1)	0.0116169	0.235617
CC	GO:0098791	Golgi apparatus subcompartment	5	2	7	154	ENSBGRG00000001080(ELAPOR1),ENSBGRG00000006836(CHPF2),ENSBGRG00000011900(STX6),ENSBGRG00000025051(SCAMP5),ENSBGRG00000025536(PLOD3)	ENSBGRG00000012778(CDH1),ENSBGRG00000019923(GCNT1)	0.0125499	0.235617
CC	GO:0005802	trans-Golgi network	4	2	6	123	ENSBGRG00000001080(ELAPOR1),ENSBGRG00000011900(STX6),ENSBGRG00000025051(SCAMP5),ENSBGRG00000025536(PLOD3)	ENSBGRG00000012778(CDH1),ENSBGRG00000019923(GCNT1)	0.0147752	0.235617
CC	GO:0018995	host cellular component	1	0	1	1	ENSBGRG00000020110(AXL)	-	0.0161637	0.235617
CC	GO:0033643	host cell part	1	0	1	1	ENSBGRG00000020110(AXL)	-	0.0161637	0.235617
CC	GO:0035355	Toll-like receptor 2-Toll-like receptor 6 protein complex	0	1	1	1	-	ENSBGRG00000017549(TLR2)	0.0161637	0.235617
CC	GO:0043657	host cell	1	0	1	1	ENSBGRG00000020110(AXL)	-	0.0161637	0.235617
CC	GO:0044228	host cell surface	1	0	1	1	ENSBGRG00000020110(AXL)	-	0.0161637	0.235617
CC	GO:0097451	glial limiting end-foot	1	0	1	1	ENSBGRG00000017288(ADGRG1)	-	0.0161637	0.235617
CC	GO:0016328	lateral plasma membrane	2	1	3	34	ENSBGRG00000007004(NKD2),ENSBGRG00000010087(NSG1)	ENSBGRG00000012778(CDH1)	0.0172321	0.241888
CC	GO:0031984	organelle subcompartment	5	2	7	167	ENSBGRG00000001080(ELAPOR1),ENSBGRG00000006836(CHPF2),ENSBGRG00000011900(STX6),ENSBGRG00000025051(SCAMP5),ENSBGRG00000025536(PLOD3)	ENSBGRG00000012778(CDH1),ENSBGRG00000019923(GCNT1)	0.0188143	0.254665
CC	GO:0001518	voltage-gated sodium channel complex	1	1	2	14	ENSBGRG00000022985(SCN4B)	ENSBGRG00000012965(SCN3B)	0.020821	0.272109
CC	GO:0031253	cell projection membrane	5	1	6	136	ENSBGRG00000005972(PALM),ENSBGRG00000009343(MCHR1),ENSBGRG00000017135(PLEKHO1),ENSBGRG00000017840(ARF6),ENSBGRG00000022167(GPI)	ENSBGRG00000011354(BMX)	0.0230484	0.290631
CC	GO:0098644	complex of collagen trimers	2	0	2	15	ENSBGRG00000004437(COL4A1),ENSBGRG00000005083(COL4A2)	-	0.0237719	0.290631
CC	GO:0000151	ubiquitin ligase complex	5	2	7	183	ENSBGRG00000009933(ASB12),ENSBGRG00000017122(PHC2),ENSBGRG00000020214(CBX2),ENSBGRG00000020275(CBX8),ENSBGRG00000020445(CBX4)	ENSBGRG00000007139(KLHL15),ENSBGRG00000021547(FBXL3)	0.0291925	0.296428
CC	GO:0005854	nascent polypeptide-associated complex	1	0	1	2	ENSBGRG00000019261	-	0.0320674	0.296428
CC	GO:0017090	meprin A complex	1	0	1	2	ENSBGRG00000022005(MEP1B)	-	0.0320674	0.296428
CC	GO:0031302	intrinsic component of endosome membrane	1	0	1	2	ENSBGRG00000020060(TMEM175)	-	0.0320674	0.296428
CC	GO:0031303	integral component of endosome membrane	1	0	1	2	ENSBGRG00000020060(TMEM175)	-	0.0320674	0.296428
CC	GO:0035354	Toll-like receptor 1-Toll-like receptor 2 protein complex	0	1	1	2	-	ENSBGRG00000017549(TLR2)	0.0320674	0.296428
CC	GO:0036194	muscle cell projection	1	0	1	2	ENSBGRG00000017135(PLEKHO1)	-	0.0320674	0.296428
CC	GO:0036195	muscle cell projection membrane	1	0	1	2	ENSBGRG00000017135(PLEKHO1)	-	0.0320674	0.296428
CC	GO:0043259	laminin-10 complex	1	0	1	2	ENSBGRG00000021195(LAMA5)	-	0.0320674	0.296428
CC	GO:1902937	inward rectifier potassium channel complex	1	0	1	2	ENSBGRG00000004337(KCNH2)	-	0.0320674	0.296428
CC	GO:0000124	SAGA complex	0	2	2	18	-	ENSBGRG00000005859(TADA1),ENSBGRG00000013181(TAF9)	0.0335618	0.302856
CC	GO:0000139	Golgi membrane	5	1	6	153	ENSBGRG00000002161(POMGNT1),ENSBGRG00000006836(CHPF2),ENSBGRG00000008923(PTGES2),ENSBGRG00000011900(STX6),ENSBGRG00000025051(SCAMP5)	ENSBGRG00000012722(CASD1)	0.0379214	0.323091
CC	GO:0005576	extracellular region	23	4	27	1176	ENSBGRG00000000313(CCN1),ENSBGRG00000002127(OLFML2B),ENSBGRG00000003011(PODN),ENSBGRG00000003703(CENPE),ENSBGRG00000004437(COL4A1),ENSBGRG00000005083(COL4A2),ENSBGRG00000005880(VSTM2L),ENSBGRG00000006039(XYLT2),ENSBGRG00000007264(TNFSF4),ENSBGRG00000011484(SFRP1),ENSBGRG00000014092(SOD3),ENSBGRG00000014778(PGK1),ENSBGRG00000017016(CLEC11A),ENSBGRG00000017761(PXDN),ENSBGRG00000020110(AXL),ENSBGRG0…	ENSBGRG00000003633(TF),ENSBGRG00000004390(IQCB1),ENSBGRG00000020251,ENSBGRG00000021648(ENPP1)	0.0393138	0.323091
CC	GO:0005581	collagen trimer	2	0	2	20	ENSBGRG00000004437(COL4A1),ENSBGRG00000005083(COL4A2)	-	0.0408124	0.323091
CC	GO:0034706	sodium channel complex	1	1	2	20	ENSBGRG00000022985(SCN4B)	ENSBGRG00000012965(SCN3B)	0.0408124	0.323091
CC	GO:0005634	nucleus	54	28	82	4319	ENSBGRG00000000257(SLX9),ENSBGRG00000000523(NR4A1),ENSBGRG00000002480(SOX7),ENSBGRG00000003703(CENPE),ENSBGRG00000003738(CC2D1B),ENSBGRG00000005366(CDC34),ENSBGRG00000005972(PALM),ENSBGRG00000006341(NRDE2),ENSBGRG00000006582(L3MBTL2),ENSBGRG00000007368(FAM53B),ENSBGRG00000007584(PRAG1),ENSBGRG00000008036(DTX2),ENSBGRG00000008094(KLF10),ENSBGRG00000008356(KIF4A),ENSBGRG00000008707(HR),ENSBGRG00000…	ENSBGRG00000001029(GTF3C3),ENSBGRG00000001610(GABPB2),ENSBGRG00000002355(NIFK),ENSBGRG00000003232(LRIF1),ENSBGRG00000003528(WDR75),ENSBGRG00000003542(PRIM1),ENSBGRG00000004102(STK3),ENSBGRG00000004390(IQCB1),ENSBGRG00000005859(TADA1),ENSBGRG00000006896(TRIP13),ENSBGRG00000007139(KLHL15),ENSBGRG00000007410(NAMPT),ENSBGRG00000008888(CDH17),ENSBGRG00000009254(PIK3C2A),ENSBGRG00000011354(BMX),ENSBGRG…	0.041999	0.323091
CC	GO:0032588	trans-Golgi network membrane	2	0	2	21	ENSBGRG00000011900(STX6),ENSBGRG00000025051(SCAMP5)	-	0.0446385	0.323091
CC	GO:0005794	Golgi apparatus	14	5	19	777	ENSBGRG00000001080(ELAPOR1),ENSBGRG00000002161(POMGNT1),ENSBGRG00000006836(CHPF2),ENSBGRG00000008923(PTGES2),ENSBGRG00000009515(DPP7),ENSBGRG00000011900(STX6),ENSBGRG00000015838(TMC8),ENSBGRG00000018040(CD14),ENSBGRG00000019794(CANT1),ENSBGRG00000020363(RUSC1),ENSBGRG00000024893(QSOX2),ENSBGRG00000024972(GPSM1),ENSBGRG00000025051(SCAMP5),ENSBGRG00000025536(PLOD3)	ENSBGRG00000012722(CASD1),ENSBGRG00000012778(CDH1),ENSBGRG00000017549(TLR2),ENSBGRG00000019923(GCNT1),ENSBGRG00000020997(GLCE)	0.0467379	0.323091
CC	GO:0030175	filopodium	2	1	3	50	ENSBGRG00000005972(PALM),ENSBGRG00000017840(ARF6)	ENSBGRG00000014062(ABI1)	0.0468425	0.323091
CC	GO:0005658	alpha DNA polymerase:primase complex	0	1	1	3	-	ENSBGRG00000003542(PRIM1)	0.0477153	0.323091
CC	GO:0046696	lipopolysaccharide receptor complex	1	0	1	3	ENSBGRG00000018040(CD14)	-	0.0477153	0.323091
CC	GO:0048179	activin receptor complex	0	1	1	3	-	ENSBGRG00000009051(ACVR1C)	0.0477153	0.323091
CC	GO:0097450	astrocyte end-foot	1	0	1	3	ENSBGRG00000017288(ADGRG1)	-	0.0477153	0.323091
CC	GO:1990124	messenger ribonucleoprotein complex	1	0	1	3	ENSBGRG00000025082(PKP1)	-	0.0477153	0.323091
CC	GO:0051233	spindle midzone	2	0	2	22	ENSBGRG00000003703(CENPE),ENSBGRG00000007157(CCDC69)	-	0.0485914	0.323091
CC	GO:0070461	SAGA-type complex	0	2	2	22	-	ENSBGRG00000005859(TADA1),ENSBGRG00000013181(TAF9)	0.0485914	0.323091
MF	GO:0071723	lipopeptide binding	1	1	2	3	ENSBGRG00000018040(CD14)	ENSBGRG00000017549(TLR2)	0.000751011	0.130888
MF	GO:0005488	binding	125	56	181	10057	ENSBGRG00000000313(CCN1),ENSBGRG00000000523(NR4A1),ENSBGRG00000002127(OLFML2B),ENSBGRG00000002161(POMGNT1),ENSBGRG00000002480(SOX7),ENSBGRG00000002593(ATP13A2),ENSBGRG00000002916(GPD1),ENSBGRG00000003011(PODN),ENSBGRG00000003335(HECTD3),ENSBGRG00000003404(ALDH4A1),ENSBGRG00000003703(CENPE),ENSBGRG00000003738(CC2D1B),ENSBGRG00000004297(LYNX1),ENSBGRG00000004337(KCNH2),ENSBGRG00000004437(COL4A1),EN…	ENSBGRG00000001029(GTF3C3),ENSBGRG00000001610(GABPB2),ENSBGRG00000002355(NIFK),ENSBGRG00000002717,ENSBGRG00000002918(PFDN5),ENSBGRG00000003232(LRIF1),ENSBGRG00000003528(WDR75),ENSBGRG00000003542(PRIM1),ENSBGRG00000003576(KLB),ENSBGRG00000003633(TF),ENSBGRG00000004102(STK3),ENSBGRG00000004390(IQCB1),ENSBGRG00000006896(TRIP13),ENSBGRG00000007139(KLHL15),ENSBGRG00000007270(NLRC4),ENSBGRG00000007410(…	0.000793125	0.130888
MF	GO:0046872	metal ion binding	28	15	43	1682	ENSBGRG00000000523(NR4A1),ENSBGRG00000002161(POMGNT1),ENSBGRG00000006039(XYLT2),ENSBGRG00000006266(S100A14),ENSBGRG00000006582(L3MBTL2),ENSBGRG00000006986(CD93),ENSBGRG00000008036(DTX2),ENSBGRG00000008276(SLC25A25),ENSBGRG00000009629(BMP1),ENSBGRG00000010949(CYP2D6),ENSBGRG00000011874(PEPD),ENSBGRG00000012014(ENO1),ENSBGRG00000013193(MYL3),ENSBGRG00000013297(CRELD1),ENSBGRG00000013574(PKM),ENSBGR…	ENSBGRG00000002717,ENSBGRG00000003542(PRIM1),ENSBGRG00000003633(TF),ENSBGRG00000004102(STK3),ENSBGRG00000007957(PLCH1),ENSBGRG00000008888(CDH17),ENSBGRG00000012778(CDH1),ENSBGRG00000016397(CYP4V2),ENSBGRG00000016750(TIPARP),ENSBGRG00000018410(NR6A1),ENSBGRG00000018643(GATAD1),ENSBGRG00000020719,ENSBGRG00000020997(GLCE),ENSBGRG00000021593,ENSBGRG00000021648(ENPP1)	0.00109571	0.130888
MF	GO:0016286	small conductance calcium-activated potassium channel activity	0	2	2	4	-	ENSBGRG00000011476(KCNN2),ENSBGRG00000026088(KCNN1)	0.00148622	0.130888
MF	GO:0086006	voltage-gated sodium channel activity involved in cardiac muscle cell action potential	1	1	2	4	ENSBGRG00000022985(SCN4B)	ENSBGRG00000012965(SCN3B)	0.00148622	0.130888
MF	GO:0050840	extracellular matrix binding	4	0	4	32	ENSBGRG00000000313(CCN1),ENSBGRG00000002127(OLFML2B),ENSBGRG00000017288(ADGRG1),ENSBGRG00000017761(PXDN)	-	0.0015923	0.130888
MF	GO:0035064	methylated histone binding	5	0	5	56	ENSBGRG00000006582(L3MBTL2),ENSBGRG00000020214(CBX2),ENSBGRG00000020275(CBX8),ENSBGRG00000020445(CBX4),ENSBGRG00000023942(CXXC1)	-	0.00194142	0.130888
MF	GO:0140034	methylation-dependent protein binding	5	0	5	56	ENSBGRG00000006582(L3MBTL2),ENSBGRG00000020214(CBX2),ENSBGRG00000020275(CBX8),ENSBGRG00000020445(CBX4),ENSBGRG00000023942(CXXC1)	-	0.00194142	0.130888
MF	GO:0043565	sequence-specific DNA binding	17	9	26	891	ENSBGRG00000000523(NR4A1),ENSBGRG00000002480(SOX7),ENSBGRG00000003738(CC2D1B),ENSBGRG00000004337(KCNH2),ENSBGRG00000008094(KLF10),ENSBGRG00000009096(FOS),ENSBGRG00000012014(ENO1),ENSBGRG00000012066(EBF3),ENSBGRG00000015957(GLIS2),ENSBGRG00000020445(CBX4),ENSBGRG00000021840(OSR1),ENSBGRG00000023942(CXXC1),ENSBGRG00000024506(NR2F6),ENSBGRG00000024826(NACC2),ENSBGRG00000025104(DNLZ),ENSBGRG000000262…	ENSBGRG00000001610(GABPB2),ENSBGRG00000012579(FOXO1),ENSBGRG00000013181(TAF9),ENSBGRG00000014262(PPARGC1A),ENSBGRG00000016750(TIPARP),ENSBGRG00000018410(NR6A1),ENSBGRG00000018643(GATAD1),ENSBGRG00000024251(E2F6),ENSBGRG00000025786(ARID5B)	0.00206132	0.130888
MF	GO:0005515	protein binding	89	38	127	6620	ENSBGRG00000000313(CCN1),ENSBGRG00000000523(NR4A1),ENSBGRG00000002127(OLFML2B),ENSBGRG00000002916(GPD1),ENSBGRG00000003011(PODN),ENSBGRG00000003335(HECTD3),ENSBGRG00000003404(ALDH4A1),ENSBGRG00000003703(CENPE),ENSBGRG00000004297(LYNX1),ENSBGRG00000004337(KCNH2),ENSBGRG00000004437(COL4A1),ENSBGRG00000005949(ARHGEF39),ENSBGRG00000005972(PALM),ENSBGRG00000006266(S100A14),ENSBGRG00000006288(FBP2),ENS…	ENSBGRG00000001029(GTF3C3),ENSBGRG00000001610(GABPB2),ENSBGRG00000002918(PFDN5),ENSBGRG00000003232(LRIF1),ENSBGRG00000003528(WDR75),ENSBGRG00000003576(KLB),ENSBGRG00000003633(TF),ENSBGRG00000004102(STK3),ENSBGRG00000004390(IQCB1),ENSBGRG00000006896(TRIP13),ENSBGRG00000007139(KLHL15),ENSBGRG00000007270(NLRC4),ENSBGRG00000007410(NAMPT),ENSBGRG00000008695(PBLD),ENSBGRG00000008888(CDH17),ENSBGRG00000…	0.00225288	0.130888
MF	GO:0016413	O-acetyltransferase activity	1	1	2	5	ENSBGRG00000017531(CRAT)	ENSBGRG00000012722(CASD1)	0.00245101	0.130888
MF	GO:0043169	cation binding	28	15	43	1754	ENSBGRG00000000523(NR4A1),ENSBGRG00000002161(POMGNT1),ENSBGRG00000006039(XYLT2),ENSBGRG00000006266(S100A14),ENSBGRG00000006582(L3MBTL2),ENSBGRG00000006986(CD93),ENSBGRG00000008036(DTX2),ENSBGRG00000008276(SLC25A25),ENSBGRG00000009629(BMP1),ENSBGRG00000010949(CYP2D6),ENSBGRG00000011874(PEPD),ENSBGRG00000012014(ENO1),ENSBGRG00000013193(MYL3),ENSBGRG00000013297(CRELD1),ENSBGRG00000013574(PKM),ENSBGR…	ENSBGRG00000002717,ENSBGRG00000003542(PRIM1),ENSBGRG00000003633(TF),ENSBGRG00000004102(STK3),ENSBGRG00000007957(PLCH1),ENSBGRG00000008888(CDH17),ENSBGRG00000012778(CDH1),ENSBGRG00000016397(CYP4V2),ENSBGRG00000016750(TIPARP),ENSBGRG00000018410(NR6A1),ENSBGRG00000018643(GATAD1),ENSBGRG00000020719,ENSBGRG00000020997(GLCE),ENSBGRG00000021593,ENSBGRG00000021648(ENPP1)	0.00248129	0.130888
MF	GO:0016861	intramolecular oxidoreductase activity, interconverting aldoses and ketoses	2	0	2	6	ENSBGRG00000021836(TPI1),ENSBGRG00000022167(GPI)	-	0.00363794	0.138232
MF	GO:0042802	identical protein binding	23	13	36	1428	ENSBGRG00000000523(NR4A1),ENSBGRG00000002127(OLFML2B),ENSBGRG00000002916(GPD1),ENSBGRG00000003404(ALDH4A1),ENSBGRG00000004337(KCNH2),ENSBGRG00000006288(FBP2),ENSBGRG00000007584(PRAG1),ENSBGRG00000009096(FOS),ENSBGRG00000009629(BMP1),ENSBGRG00000011484(SFRP1),ENSBGRG00000012014(ENO1),ENSBGRG00000017122(PHC2),ENSBGRG00000019591(NLGN2),ENSBGRG00000019794(CANT1),ENSBGRG00000020354(DUSP29),ENSBGRG0000…	ENSBGRG00000001610(GABPB2),ENSBGRG00000004102(STK3),ENSBGRG00000006896(TRIP13),ENSBGRG00000007270(NLRC4),ENSBGRG00000007410(NAMPT),ENSBGRG00000008695(PBLD),ENSBGRG00000010694(AMD1),ENSBGRG00000012363(SDC4),ENSBGRG00000012778(CDH1),ENSBGRG00000017549(TLR2),ENSBGRG00000018410(NR6A1),ENSBGRG00000020997(GLCE),ENSBGRG00000021648(ENPP1)	0.00369556	0.138232
MF	GO:0016903	oxidoreductase activity, acting on the aldehyde or oxo group of donors	4	0	4	43	ENSBGRG00000003404(ALDH4A1),ENSBGRG00000011174,ENSBGRG00000019059(BCKDHA),ENSBGRG00000026145(ALDH2)	-	0.00476787	0.138232
MF	GO:0004029	aldehyde dehydrogenase (NAD+) activity	2	0	2	7	ENSBGRG00000003404(ALDH4A1),ENSBGRG00000026145(ALDH2)	-	0.00503974	0.138232
MF	GO:0046914	transition metal ion binding	17	7	24	866	ENSBGRG00000000523(NR4A1),ENSBGRG00000002161(POMGNT1),ENSBGRG00000006039(XYLT2),ENSBGRG00000006582(L3MBTL2),ENSBGRG00000008036(DTX2),ENSBGRG00000009629(BMP1),ENSBGRG00000010949(CYP2D6),ENSBGRG00000011874(PEPD),ENSBGRG00000014023(ADA),ENSBGRG00000014092(SOD3),ENSBGRG00000017122(PHC2),ENSBGRG00000022005(MEP1B),ENSBGRG00000023942(CXXC1),ENSBGRG00000024506(NR2F6),ENSBGRG00000025104(DNLZ),ENSBGRG00000…	ENSBGRG00000003542(PRIM1),ENSBGRG00000003633(TF),ENSBGRG00000016397(CYP4V2),ENSBGRG00000018410(NR6A1),ENSBGRG00000018643(GATAD1),ENSBGRG00000020719,ENSBGRG00000021593	0.00581436	0.138232
MF	GO:0016627	oxidoreductase activity, acting on the CH-CH group of donors	4	0	4	47	ENSBGRG00000001124(PPOX),ENSBGRG00000014917(ACAD8),ENSBGRG00000017531(CRAT),ENSBGRG00000026412(ACADS)	-	0.00655891	0.138232
MF	GO:0000976	transcription regulatory region sequence-specific DNA binding	12	6	18	604	ENSBGRG00000002480(SOX7),ENSBGRG00000003738(CC2D1B),ENSBGRG00000004337(KCNH2),ENSBGRG00000008094(KLF10),ENSBGRG00000009096(FOS),ENSBGRG00000012014(ENO1),ENSBGRG00000012066(EBF3),ENSBGRG00000015957(GLIS2),ENSBGRG00000020445(CBX4),ENSBGRG00000024506(NR2F6),ENSBGRG00000024826(NACC2),ENSBGRG00000026269(MYOG)	ENSBGRG00000001610(GABPB2),ENSBGRG00000013181(TAF9),ENSBGRG00000016750(TIPARP),ENSBGRG00000018410(NR6A1),ENSBGRG00000024251(E2F6),ENSBGRG00000025786(ARID5B)	0.00810191	0.138232
MF	GO:0001067	regulatory region nucleic acid binding	12	6	18	605	ENSBGRG00000002480(SOX7),ENSBGRG00000003738(CC2D1B),ENSBGRG00000004337(KCNH2),ENSBGRG00000008094(KLF10),ENSBGRG00000009096(FOS),ENSBGRG00000012014(ENO1),ENSBGRG00000012066(EBF3),ENSBGRG00000015957(GLIS2),ENSBGRG00000020445(CBX4),ENSBGRG00000024506(NR2F6),ENSBGRG00000024826(NACC2),ENSBGRG00000026269(MYOG)	ENSBGRG00000001610(GABPB2),ENSBGRG00000013181(TAF9),ENSBGRG00000016750(TIPARP),ENSBGRG00000018410(NR6A1),ENSBGRG00000024251(E2F6),ENSBGRG00000025786(ARID5B)	0.00823415	0.138232
MF	GO:0003995	acyl-CoA dehydrogenase activity	2	0	2	9	ENSBGRG00000014917(ACAD8),ENSBGRG00000026412(ACADS)	-	0.00845977	0.138232
MF	GO:0004030	aldehyde dehydrogenase [NAD(P)+] activity	2	0	2	9	ENSBGRG00000003404(ALDH4A1),ENSBGRG00000026145(ALDH2)	-	0.00845977	0.138232
MF	GO:0016634	oxidoreductase activity, acting on the CH-CH group of donors, oxygen as acceptor	2	0	2	9	ENSBGRG00000001124(PPOX),ENSBGRG00000017531(CRAT)	-	0.00845977	0.138232
MF	GO:0031957	very long-chain fatty acid-CoA ligase activity	2	0	2	9	ENSBGRG00000025244(SLC27A1),ENSBGRG00000026875(ACSF3)	-	0.00845977	0.138232
MF	GO:0035004	phosphatidylinositol 3-kinase activity	1	1	2	9	ENSBGRG00000009666(PIK3C2B)	ENSBGRG00000009254(PIK3C2A)	0.00845977	0.138232
MF	GO:0045295	gamma-catenin binding	0	2	2	9	-	ENSBGRG00000012778(CDH1),ENSBGRG00000015268(PTPRK)	0.00845977	0.138232
MF	GO:0016763	transferase activity, transferring pentosyl groups	1	3	4	51	ENSBGRG00000006039(XYLT2)	ENSBGRG00000007410(NAMPT),ENSBGRG00000014983(ART3),ENSBGRG00000016750(TIPARP)	0.0087475	0.138232
MF	GO:0016860	intramolecular oxidoreductase activity	3	0	3	27	ENSBGRG00000008923(PTGES2),ENSBGRG00000021836(TPI1),ENSBGRG00000022167(GPI)	-	0.00881652	0.138232
MF	GO:0016491	oxidoreductase activity	17	1	18	610	ENSBGRG00000001124(PPOX),ENSBGRG00000002916(GPD1),ENSBGRG00000003404(ALDH4A1),ENSBGRG00000010901(DHRS7B),ENSBGRG00000010949(CYP2D6),ENSBGRG00000011174,ENSBGRG00000014092(SOD3),ENSBGRG00000014778(PGK1),ENSBGRG00000014917(ACAD8),ENSBGRG00000017531(CRAT),ENSBGRG00000017761(PXDN),ENSBGRG00000019059(BCKDHA),ENSBGRG00000024359(HSD3B7),ENSBGRG00000024893(QSOX2),ENSBGRG00000025536(PLOD3),ENSBGRG000000261…	ENSBGRG00000016397(CYP4V2)	0.00892176	0.138232
MF	GO:0003824	catalytic activity	66	28	94	4832	ENSBGRG00000001124(PPOX),ENSBGRG00000002161(POMGNT1),ENSBGRG00000002593(ATP13A2),ENSBGRG00000002916(GPD1),ENSBGRG00000003335(HECTD3),ENSBGRG00000003404(ALDH4A1),ENSBGRG00000003703(CENPE),ENSBGRG00000004287(PPM1J),ENSBGRG00000005144(MOCS3),ENSBGRG00000005366(CDC34),ENSBGRG00000006039(XYLT2),ENSBGRG00000006288(FBP2),ENSBGRG00000006836(CHPF2),ENSBGRG00000007584(PRAG1),ENSBGRG00000008127(RHOF),ENSBGR…	ENSBGRG00000003542(PRIM1),ENSBGRG00000003576(KLB),ENSBGRG00000004102(STK3),ENSBGRG00000006896(TRIP13),ENSBGRG00000007410(NAMPT),ENSBGRG00000007957(PLCH1),ENSBGRG00000008695(PBLD),ENSBGRG00000009051(ACVR1C),ENSBGRG00000009254(PIK3C2A),ENSBGRG00000009743(FDXACB1),ENSBGRG00000010694(AMD1),ENSBGRG00000011354(BMX),ENSBGRG00000012722(CASD1),ENSBGRG00000013181(TAF9),ENSBGRG00000014981(FKBP5),ENSBGRG0000…	0.0103195	0.138232
MF	GO:0016757	transferase activity, transferring glycosyl groups	5	4	9	229	ENSBGRG00000002161(POMGNT1),ENSBGRG00000006039(XYLT2),ENSBGRG00000006836(CHPF2),ENSBGRG00000008937(EXTL1),ENSBGRG00000025536(PLOD3)	ENSBGRG00000007410(NAMPT),ENSBGRG00000014983(ART3),ENSBGRG00000016750(TIPARP),ENSBGRG00000019923(GCNT1)	0.0112751	0.138232
MF	GO:0043167	ion binding	47	23	70	3449	ENSBGRG00000000523(NR4A1),ENSBGRG00000002161(POMGNT1),ENSBGRG00000002593(ATP13A2),ENSBGRG00000003703(CENPE),ENSBGRG00000006039(XYLT2),ENSBGRG00000006266(S100A14),ENSBGRG00000006582(L3MBTL2),ENSBGRG00000006986(CD93),ENSBGRG00000007584(PRAG1),ENSBGRG00000008036(DTX2),ENSBGRG00000008127(RHOF),ENSBGRG00000008276(SLC25A25),ENSBGRG00000008356(KIF4A),ENSBGRG00000009629(BMP1),ENSBGRG00000009666(PIK3C2B),…	ENSBGRG00000002717,ENSBGRG00000003542(PRIM1),ENSBGRG00000003633(TF),ENSBGRG00000004102(STK3),ENSBGRG00000006896(TRIP13),ENSBGRG00000007270(NLRC4),ENSBGRG00000007957(PLCH1),ENSBGRG00000008888(CDH17),ENSBGRG00000009051(ACVR1C),ENSBGRG00000009254(PIK3C2A),ENSBGRG00000011354(BMX),ENSBGRG00000012778(CDH1),ENSBGRG00000016397(CYP4V2),ENSBGRG00000016750(TIPARP),ENSBGRG00000018400,ENSBGRG00000018410(NR6A1…	0.0128999	0.138232
MF	GO:0005201	extracellular matrix structural constituent	3	0	3	32	ENSBGRG00000004437(COL4A1),ENSBGRG00000005083(COL4A2),ENSBGRG00000017761(PXDN)	-	0.0141059	0.138232
MF	GO:0016877	ligase activity, forming carbon-sulfur bonds	3	0	3	32	ENSBGRG00000005144(MOCS3),ENSBGRG00000025244(SLC27A1),ENSBGRG00000026875(ACSF3)	-	0.0141059	0.138232
MF	GO:0015269	calcium-activated potassium channel activity	0	2	2	12	-	ENSBGRG00000011476(KCNN2),ENSBGRG00000026088(KCNN1)	0.0150296	0.138232
MF	GO:0000225	N-acetylglucosaminylphosphatidylinositol deacetylase activity	1	0	1	1	ENSBGRG00000012134(PIGL)	-	0.0159414	0.138232
MF	GO:0003842	1-pyrroline-5-carboxylate dehydrogenase activity	1	0	1	1	ENSBGRG00000003404(ALDH4A1)	-	0.0159414	0.138232
MF	GO:0004014	adenosylmethionine decarboxylase activity	0	1	1	1	-	ENSBGRG00000010694(AMD1)	0.0159414	0.138232
MF	GO:0004092	carnitine O-acetyltransferase activity	1	0	1	1	ENSBGRG00000017531(CRAT)	-	0.0159414	0.138232
MF	GO:0004347	glucose-6-phosphate isomerase activity	1	0	1	1	ENSBGRG00000022167(GPI)	-	0.0159414	0.138232
MF	GO:0004729	oxygen-dependent protoporphyrinogen oxidase activity	1	0	1	1	ENSBGRG00000001124(PPOX)	-	0.0159414	0.138232
MF	GO:0004807	triose-phosphate isomerase activity	1	0	1	1	ENSBGRG00000021836(TPI1)	-	0.0159414	0.138232
MF	GO:0004964	luteinizing hormone receptor activity	0	1	1	1	-	ENSBGRG00000011219(LHCGR)	0.0159414	0.138232
MF	GO:0015203	polyamine transmembrane transporter activity	1	0	1	1	ENSBGRG00000002593(ATP13A2)	-	0.0159414	0.138232
MF	GO:0015417	ATPase-coupled polyamine transmembrane transporter activity	1	0	1	1	ENSBGRG00000002593(ATP13A2)	-	0.0159414	0.138232
MF	GO:0016436	rRNA (uridine) methyltransferase activity	0	1	1	1	-	ENSBGRG00000009743(FDXACB1)	0.0159414	0.138232
MF	GO:0018547	nitroglycerin reductase activity	1	0	1	1	ENSBGRG00000026145(ALDH2)	-	0.0159414	0.138232
MF	GO:0030020	extracellular matrix structural constituent conferring tensile strength	1	0	1	1	ENSBGRG00000004437(COL4A1)	-	0.0159414	0.138232
MF	GO:0030273	melanin-concentrating hormone receptor activity	1	0	1	1	ENSBGRG00000009343(MCHR1)	-	0.0159414	0.138232
MF	GO:0030731	guanidinoacetate N-methyltransferase activity	1	0	1	1	ENSBGRG00000015533(GAMT)	-	0.0159414	0.138232
MF	GO:0031750	D3 dopamine receptor binding	1	0	1	1	ENSBGRG00000005972(PALM)	-	0.0159414	0.138232
MF	GO:0033823	procollagen glucosyltransferase activity	1	0	1	1	ENSBGRG00000025536(PLOD3)	-	0.0159414	0.138232
MF	GO:0035034	histone acetyltransferase regulator activity	1	0	1	1	ENSBGRG00000009080(PYGO2)	-	0.0159414	0.138232
MF	GO:0035472	choriogonadotropin hormone receptor activity	0	1	1	1	-	ENSBGRG00000011219(LHCGR)	0.0159414	0.138232
MF	GO:0038100	nodal binding	0	1	1	1	-	ENSBGRG00000009051(ACVR1C)	0.0159414	0.138232
MF	GO:0038106	choriogonadotropin hormone binding	0	1	1	1	-	ENSBGRG00000011219(LHCGR)	0.0159414	0.138232
MF	GO:0042132	fructose 1,6-bisphosphate 1-phosphatase activity	1	0	1	1	ENSBGRG00000006288(FBP2)	-	0.0159414	0.138232
MF	GO:0042292	URM1 activating enzyme activity	1	0	1	1	ENSBGRG00000005144(MOCS3)	-	0.0159414	0.138232
MF	GO:0042497	triacyl lipopeptide binding	0	1	1	1	-	ENSBGRG00000017549(TLR2)	0.0159414	0.138232
MF	GO:0046936	deoxyadenosine deaminase activity	1	0	1	1	ENSBGRG00000014023(ADA)	-	0.0159414	0.138232
MF	GO:0047016	cholest-5-ene-3-beta,7-alpha-diol 3-beta-dehydrogenase activity	1	0	1	1	ENSBGRG00000024359(HSD3B7)	-	0.0159414	0.138232
MF	GO:0047186	N-acetylneuraminate 7-O(or 9-O)-acetyltransferase activity	0	1	1	1	-	ENSBGRG00000012722(CASD1)	0.0159414	0.138232
MF	GO:0047223	beta-1,3-galactosyl-O-glycosyl-glycoprotein beta-1,3-N-acetylglucosaminyltransferase activity	1	0	1	1	ENSBGRG00000002161(POMGNT1)	-	0.0159414	0.138232
MF	GO:0047280	nicotinamide phosphoribosyltransferase activity	0	1	1	1	-	ENSBGRG00000007410(NAMPT)	0.0159414	0.138232
MF	GO:0047464	heparosan-N-sulfate-glucuronate 5-epimerase activity	0	1	1	1	-	ENSBGRG00000020997(GLCE)	0.0159414	0.138232
MF	GO:0050429	calcium-dependent phospholipase C activity	0	1	1	1	-	ENSBGRG00000007957(PLCH1)	0.0159414	0.138232
MF	GO:0062187	anandamide 8,9 epoxidase activity	1	0	1	1	ENSBGRG00000010949(CYP2D6)	-	0.0159414	0.138232
MF	GO:0062188	anandamide 11,12 epoxidase activity	1	0	1	1	ENSBGRG00000010949(CYP2D6)	-	0.0159414	0.138232
MF	GO:0070042	rRNA (uridine-N3-)-methyltransferase activity	0	1	1	1	-	ENSBGRG00000009743(FDXACB1)	0.0159414	0.138232
MF	GO:0070818	protoporphyrinogen oxidase activity	1	0	1	1	ENSBGRG00000001124(PPOX)	-	0.0159414	0.138232
MF	GO:0090409	malonyl-CoA synthetase activity	1	0	1	1	ENSBGRG00000026875(ACSF3)	-	0.0159414	0.138232
MF	GO:0090434	oleoyl-CoA ligase activity	1	0	1	1	ENSBGRG00000025244(SLC27A1)	-	0.0159414	0.138232
MF	GO:0106177	cyclic-GMP-AMP hydrolase activity	0	1	1	1	-	ENSBGRG00000021648(ENPP1)	0.0159414	0.138232
MF	GO:0016620	oxidoreductase activity, acting on the aldehyde or oxo group of donors, NAD or NADP as acceptor	3	0	3	35	ENSBGRG00000003404(ALDH4A1),ENSBGRG00000011174,ENSBGRG00000026145(ALDH2)	-	0.0179774	0.15378
MF	GO:0003777	microtubule motor activity	3	1	4	65	ENSBGRG00000003703(CENPE),ENSBGRG00000008356(KIF4A),ENSBGRG00000016981(KIFC1)	ENSBGRG00000018400	0.0199618	0.166834
MF	GO:0016500	protein-hormone receptor activity	1	1	2	14	ENSBGRG00000009343(MCHR1)	ENSBGRG00000011219(LHCGR)	0.0202942	0.166834
MF	GO:0140103	catalytic activity, acting on a glycoprotein	1	1	2	14	ENSBGRG00000002161(POMGNT1)	ENSBGRG00000019923(GCNT1)	0.0202942	0.166834
MF	GO:0003690	double-stranded DNA binding	14	7	21	819	ENSBGRG00000000523(NR4A1),ENSBGRG00000002480(SOX7),ENSBGRG00000003738(CC2D1B),ENSBGRG00000004337(KCNH2),ENSBGRG00000008094(KLF10),ENSBGRG00000009096(FOS),ENSBGRG00000012014(ENO1),ENSBGRG00000012066(EBF3),ENSBGRG00000015957(GLIS2),ENSBGRG00000020445(CBX4),ENSBGRG00000021840(OSR1),ENSBGRG00000024506(NR2F6),ENSBGRG00000024826(NACC2),ENSBGRG00000026269(MYOG)	ENSBGRG00000001610(GABPB2),ENSBGRG00000013181(TAF9),ENSBGRG00000016750(TIPARP),ENSBGRG00000018410(NR6A1),ENSBGRG00000019825(MTERF1),ENSBGRG00000024251(E2F6),ENSBGRG00000025786(ARID5B)	0.0214135	0.172895
MF	GO:0015077	monovalent inorganic cation transmembrane transporter activity	7	3	10	299	ENSBGRG00000001755,ENSBGRG00000004337(KCNH2),ENSBGRG00000005356(SLC9A2),ENSBGRG00000012849(SLC45A3),ENSBGRG00000016298(KCNQ4),ENSBGRG00000020060(TMEM175),ENSBGRG00000022985(SCN4B)	ENSBGRG00000011476(KCNN2),ENSBGRG00000012965(SCN3B),ENSBGRG00000026088(KCNN1)	0.0218073	0.172895
MF	GO:0008194	UDP-glycosyltransferase activity	4	1	5	100	ENSBGRG00000002161(POMGNT1),ENSBGRG00000006039(XYLT2),ENSBGRG00000006836(CHPF2),ENSBGRG00000025536(PLOD3)	ENSBGRG00000019923(GCNT1)	0.0218509	0.172895
MF	GO:0000287	magnesium ion binding	5	2	7	176	ENSBGRG00000006039(XYLT2),ENSBGRG00000012014(ENO1),ENSBGRG00000013574(PKM),ENSBGRG00000017727(ILVBL),ENSBGRG00000026128(MAST3)	ENSBGRG00000003542(PRIM1),ENSBGRG00000004102(STK3)	0.0227934	0.173673
MF	GO:0015645	fatty acid ligase activity	2	0	2	15	ENSBGRG00000025244(SLC27A1),ENSBGRG00000026875(ACSF3)	-	0.0231735	0.173673
MF	GO:0017080	sodium channel regulator activity	1	1	2	15	ENSBGRG00000022985(SCN4B)	ENSBGRG00000012965(SCN3B)	0.0231735	0.173673
MF	GO:0042974	retinoic acid receptor binding	1	1	2	15	ENSBGRG00000026795(ARID5A)	ENSBGRG00000003232(LRIF1)	0.0231735	0.173673
MF	GO:1990837	sequence-specific double-stranded DNA binding	14	6	20	776	ENSBGRG00000000523(NR4A1),ENSBGRG00000002480(SOX7),ENSBGRG00000003738(CC2D1B),ENSBGRG00000004337(KCNH2),ENSBGRG00000008094(KLF10),ENSBGRG00000009096(FOS),ENSBGRG00000012014(ENO1),ENSBGRG00000012066(EBF3),ENSBGRG00000015957(GLIS2),ENSBGRG00000020445(CBX4),ENSBGRG00000021840(OSR1),ENSBGRG00000024506(NR2F6),ENSBGRG00000024826(NACC2),ENSBGRG00000026269(MYOG)	ENSBGRG00000001610(GABPB2),ENSBGRG00000013181(TAF9),ENSBGRG00000016750(TIPARP),ENSBGRG00000018410(NR6A1),ENSBGRG00000024251(E2F6),ENSBGRG00000025786(ARID5B)	0.0233211	0.173673
MF	GO:0042393	histone binding	6	0	6	142	ENSBGRG00000006582(L3MBTL2),ENSBGRG00000009080(PYGO2),ENSBGRG00000020214(CBX2),ENSBGRG00000020275(CBX8),ENSBGRG00000020445(CBX4),ENSBGRG00000023942(CXXC1)	-	0.0262351	0.192516
MF	GO:0005267	potassium channel activity	3	2	5	109	ENSBGRG00000004337(KCNH2),ENSBGRG00000016298(KCNQ4),ENSBGRG00000020060(TMEM175)	ENSBGRG00000011476(KCNN2),ENSBGRG00000026088(KCNN1)	0.0302751	0.192516
MF	GO:0003829	beta-1,3-galactosyl-O-glycosyl-glycoprotein beta-1,6-N-acetylglucosaminyltransferase activity	0	1	1	2	-	ENSBGRG00000019923(GCNT1)	0.0316298	0.192516
MF	GO:0003863	3-methyl-2-oxobutanoate dehydrogenase (2-methylpropanoyl-transferring) activity	1	0	1	2	ENSBGRG00000019059(BCKDHA)	-	0.0316298	0.192516
MF	GO:0003896	DNA primase activity	0	1	1	2	-	ENSBGRG00000003542(PRIM1)	0.0316298	0.192516
MF	GO:0004618	phosphoglycerate kinase activity	1	0	1	2	ENSBGRG00000014778(PGK1)	-	0.0316298	0.192516
MF	GO:0004743	pyruvate kinase activity	1	0	1	2	ENSBGRG00000013574(PKM)	-	0.0316298	0.192516
MF	GO:0005427	proton-dependent oligopeptide secondary active transmembrane transporter activity	0	1	1	2	-	ENSBGRG00000008888(CDH17)	0.0316298	0.192516
MF	GO:0015225	biotin transmembrane transporter activity	1	0	1	2	ENSBGRG00000025244(SLC27A1)	-	0.0316298	0.192516
MF	GO:0015322	secondary active oligopeptide transmembrane transporter activity	0	1	1	2	-	ENSBGRG00000008888(CDH17)	0.0316298	0.192516
MF	GO:0016663	oxidoreductase activity, acting on other nitrogenous compounds as donors, oxygen as acceptor	1	0	1	2	ENSBGRG00000026145(ALDH2)	-	0.0316298	0.192516
MF	GO:0030158	protein xylosyltransferase activity	1	0	1	2	ENSBGRG00000006039(XYLT2)	-	0.0316298	0.192516
MF	GO:0034986	iron chaperone activity	0	1	1	2	-	ENSBGRG00000003633(TF)	0.0316298	0.192516
MF	GO:0035005	1-phosphatidylinositol-4-phosphate 3-kinase activity	1	0	1	2	ENSBGRG00000009666(PIK3C2B)	-	0.0316298	0.192516
MF	GO:0047134	protein-disulfide reductase activity	1	0	1	2	ENSBGRG00000014778(PGK1)	-	0.0316298	0.192516
MF	GO:0050211	procollagen galactosyltransferase activity	1	0	1	2	ENSBGRG00000025536(PLOD3)	-	0.0316298	0.192516
MF	GO:0050220	prostaglandin-E synthase activity	1	0	1	2	ENSBGRG00000008923(PTGES2)	-	0.0316298	0.192516
MF	GO:0062186	anandamide epoxidase activity	1	0	1	2	ENSBGRG00000010949(CYP2D6)	-	0.0316298	0.192516
MF	GO:0062189	anandamide 14,15 epoxidase activity	1	0	1	2	ENSBGRG00000010949(CYP2D6)	-	0.0316298	0.192516
MF	GO:0030145	manganese ion binding	3	0	3	44	ENSBGRG00000002161(POMGNT1),ENSBGRG00000006039(XYLT2),ENSBGRG00000011874(PEPD)	-	0.0327916	0.197686
MF	GO:0016405	CoA-ligase activity	2	0	2	19	ENSBGRG00000025244(SLC27A1),ENSBGRG00000026875(ACSF3)	-	0.0362036	0.216197
MF	GO:0005518	collagen binding	3	0	3	47	ENSBGRG00000003011(PODN),ENSBGRG00000017288(ADGRG1),ENSBGRG00000022881(SERPINH1)	-	0.0387893	0.220679
MF	GO:0005248	voltage-gated sodium channel activity	1	1	2	20	ENSBGRG00000022985(SCN4B)	ENSBGRG00000012965(SCN3B)	0.0398119	0.220679
MF	GO:0016878	acid-thiol ligase activity	2	0	2	20	ENSBGRG00000025244(SLC27A1),ENSBGRG00000026875(ACSF3)	-	0.0398119	0.220679
MF	GO:0016853	isomerase activity	3	2	5	120	ENSBGRG00000008923(PTGES2),ENSBGRG00000021836(TPI1),ENSBGRG00000022167(GPI)	ENSBGRG00000014981(FKBP5),ENSBGRG00000020997(GLCE)	0.0430276	0.220679
MF	GO:0140030	modification-dependent protein binding	5	0	5	120	ENSBGRG00000006582(L3MBTL2),ENSBGRG00000020214(CBX2),ENSBGRG00000020275(CBX8),ENSBGRG00000020445(CBX4),ENSBGRG00000023942(CXXC1)	-	0.0430276	0.220679
MF	GO:0008270	zinc ion binding	11	5	16	627	ENSBGRG00000000523(NR4A1),ENSBGRG00000006582(L3MBTL2),ENSBGRG00000008036(DTX2),ENSBGRG00000009629(BMP1),ENSBGRG00000014023(ADA),ENSBGRG00000017122(PHC2),ENSBGRG00000022005(MEP1B),ENSBGRG00000023942(CXXC1),ENSBGRG00000024506(NR2F6),ENSBGRG00000025104(DNLZ),ENSBGRG00000025901(RNPEP)	ENSBGRG00000003542(PRIM1),ENSBGRG00000018410(NR6A1),ENSBGRG00000018643(GATAD1),ENSBGRG00000020719,ENSBGRG00000021593	0.0433059	0.220679
MF	GO:0001530	lipopolysaccharide binding	1	1	2	21	ENSBGRG00000018040(CD14)	ENSBGRG00000017549(TLR2)	0.04355	0.220679
MF	GO:0005242	inward rectifier potassium channel activity	1	1	2	21	ENSBGRG00000004337(KCNH2)	ENSBGRG00000026088(KCNN1)	0.04355	0.220679
MF	GO:0015079	potassium ion transmembrane transporter activity	3	2	5	123	ENSBGRG00000004337(KCNH2),ENSBGRG00000016298(KCNQ4),ENSBGRG00000020060(TMEM175)	ENSBGRG00000011476(KCNN2),ENSBGRG00000026088(KCNN1)	0.0469893	0.220679
MF	GO:0004367	glycerol-3-phosphate dehydrogenase [NAD+] activity	1	0	1	3	ENSBGRG00000002916(GPD1)	-	0.0470692	0.220679
MF	GO:0004514	nicotinate-nucleotide diphosphorylase (carboxylating) activity	0	1	1	3	-	ENSBGRG00000007410(NAMPT)	0.0470692	0.220679
MF	GO:0004528	phosphodiesterase I activity	0	1	1	3	-	ENSBGRG00000021648(ENPP1)	0.0470692	0.220679
MF	GO:0004784	superoxide dismutase activity	1	0	1	3	ENSBGRG00000014092(SOD3)	-	0.0470692	0.220679
MF	GO:0008475	procollagen-lysine 5-dioxygenase activity	1	0	1	3	ENSBGRG00000025536(PLOD3)	-	0.0470692	0.220679
MF	GO:0008506	sucrose:proton symporter activity	1	0	1	3	ENSBGRG00000012849(SLC45A3)	-	0.0470692	0.220679
MF	GO:0008515	sucrose transmembrane transporter activity	1	0	1	3	ENSBGRG00000012849(SLC45A3)	-	0.0470692	0.220679
MF	GO:0009669	sucrose:cation symporter activity	1	0	1	3	ENSBGRG00000012849(SLC45A3)	-	0.0470692	0.220679
MF	GO:0015154	disaccharide transmembrane transporter activity	1	0	1	3	ENSBGRG00000012849(SLC45A3)	-	0.0470692	0.220679
MF	GO:0015157	oligosaccharide transmembrane transporter activity	1	0	1	3	ENSBGRG00000012849(SLC45A3)	-	0.0470692	0.220679
MF	GO:0016721	oxidoreductase activity, acting on superoxide radicals as acceptor	1	0	1	3	ENSBGRG00000014092(SOD3)	-	0.0470692	0.220679
MF	GO:0016774	phosphotransferase activity, carboxyl group as acceptor	1	0	1	3	ENSBGRG00000014778(PGK1)	-	0.0470692	0.220679
MF	GO:0016971	flavin-linked sulfhydryl oxidase activity	1	0	1	3	ENSBGRG00000024893(QSOX2)	-	0.0470692	0.220679
MF	GO:0022841	potassium ion leak channel activity	1	0	1	3	ENSBGRG00000020060(TMEM175)	-	0.0470692	0.220679
MF	GO:0043262	adenosine-diphosphatase activity	1	0	1	3	ENSBGRG00000019794(CANT1)	-	0.0470692	0.220679
MF	GO:0047952	glycerol-3-phosphate dehydrogenase [NAD(P)+] activity	1	0	1	3	ENSBGRG00000002916(GPD1)	-	0.0470692	0.220679
MF	GO:0050780	dopamine receptor binding	1	0	1	3	ENSBGRG00000005972(PALM)	-	0.0470692	0.220679
MF	GO:0055131	C3HC4-type RING finger domain binding	1	0	1	3	ENSBGRG00000004337(KCNH2)	-	0.0470692	0.220679
MF	GO:0070053	thrombospondin receptor activity	0	1	1	3	-	ENSBGRG00000012363(SDC4)	0.0470692	0.220679
MF	GO:0070815	peptidyl-lysine 5-dioxygenase activity	1	0	1	3	ENSBGRG00000025536(PLOD3)	-	0.0470692	0.220679
MF	GO:0005227	calcium activated cation channel activity	0	2	2	22	-	ENSBGRG00000011476(KCNN2),ENSBGRG00000026088(KCNN1)	0.0474129	0.220679
MF	GO:0016740	transferase activity	22	15	37	1765	ENSBGRG00000002161(POMGNT1),ENSBGRG00000003335(HECTD3),ENSBGRG00000005144(MOCS3),ENSBGRG00000005366(CDC34),ENSBGRG00000006039(XYLT2),ENSBGRG00000006836(CHPF2),ENSBGRG00000007584(PRAG1),ENSBGRG00000008937(EXTL1),ENSBGRG00000009666(PIK3C2B),ENSBGRG00000009933(ASB12),ENSBGRG00000013574(PKM),ENSBGRG00000014778(PGK1),ENSBGRG00000015533(GAMT),ENSBGRG00000017531(CRAT),ENSBGRG00000017664(PRKD2),ENSBGRG00…	ENSBGRG00000003542(PRIM1),ENSBGRG00000004102(STK3),ENSBGRG00000007410(NAMPT),ENSBGRG00000009051(ACVR1C),ENSBGRG00000009254(PIK3C2A),ENSBGRG00000009743(FDXACB1),ENSBGRG00000011354(BMX),ENSBGRG00000012722(CASD1),ENSBGRG00000013181(TAF9),ENSBGRG00000014983(ART3),ENSBGRG00000016750(TIPARP),ENSBGRG00000019004(CDKL1),ENSBGRG00000019923(GCNT1),ENSBGRG00000020150(ULK4),ENSBGRG00000021547(FBXL3)	0.048349	0.223393

## Sheet: MP vs HP
GO analysis for differential expression mRNAs between MP vs HP												KEGG pathway analysis for differential expression mRNAs between LP vs HP
Category	GO.ID	Term	Up	Down	DEG	Total	Up_Gene	Down_Gene	Pvalue	FDR		PathwayID	Pathway	Level1	Level2	Up_number	Down_number	DEG_number	total_number	Pvalue	FDR	Up_gene	Down_gene	URL
BP	GO:2000026	regulation of multicellular organismal development	9	7	16	1313	ENSBGRG00000000772(COMP),ENSBGRG00000003116(IRF1),ENSBGRG00000003222(THPO),ENSBGRG00000008094(KLF10),ENSBGRG00000009096(FOS),ENSBGRG00000010987(ANGPTL7),ENSBGRG00000012849(SLC45A3),ENSBGRG00000023768(MAF),ENSBGRG00000024152(HYAL1)	ENSBGRG00000002144(SOX10),ENSBGRG00000002408(FRZB),ENSBGRG00000003810,ENSBGRG00000013093(FGF7),ENSBGRG00000015158(DPYSL3),ENSBGRG00000015786(CXCL10),ENSBGRG00000019092(S1PR3)	0.000547041	0.201836		ko04668	TNF signaling pathway	Environmental Information Processing	Signal transduction	3	1	4	101	0.0017741	0.187826	ENSBGRG00000014185,ENSBGRG00000003116(IRF1),ENSBGRG00000009096(FOS)	ENSBGRG00000015786(CXCL10)	http://www.kegg.jp/kegg-bin/show_pathway?map=map04668&multi_query=K12671+%23FFFFFF,green%0d%0aK09444+%23FFFFFF,red%0d%0aK17072+%23FFFFFF,red%0d%0aK04379+%23FFFFFF,red%0d%0a
BP	GO:0051239	regulation of multicellular organismal process	10	11	21	2041	ENSBGRG00000000772(COMP),ENSBGRG00000003116(IRF1),ENSBGRG00000003222(THPO),ENSBGRG00000008094(KLF10),ENSBGRG00000009096(FOS),ENSBGRG00000010987(ANGPTL7),ENSBGRG00000012849(SLC45A3),ENSBGRG00000023768(MAF),ENSBGRG00000024152(HYAL1),ENSBGRG00000025051(SCAMP5)	ENSBGRG00000002144(SOX10),ENSBGRG00000002408(FRZB),ENSBGRG00000003810,ENSBGRG00000009542(SCN11A),ENSBGRG00000011476(KCNN2),ENSBGRG00000012965(SCN3B),ENSBGRG00000013093(FGF7),ENSBGRG00000015158(DPYSL3),ENSBGRG00000015786(CXCL10),ENSBGRG00000017549(TLR2),ENSBGRG00000019092(S1PR3)	0.000611927	0.201836		ko05140	Leishmaniasis	Human Diseases	Infectious disease: parasitic	1	2	3	66	0.00474756	0.187826	ENSBGRG00000009096(FOS)	ENSBGRG00000017549(TLR2),ENSBGRG00000019265	http://www.kegg.jp/kegg-bin/show_pathway?map=map05140&multi_query=K06752+%23FFFFFF,green%0d%0aK10159+%23FFFFFF,green%0d%0aK04379+%23FFFFFF,red%0d%0a
BP	GO:0086014	atrial cardiac muscle cell action potential	0	2	2	8	-	ENSBGRG00000011476(KCNN2),ENSBGRG00000012965(SCN3B)	0.000666258	0.201836		ko05321	Inflammatory bowel disease	Human Diseases	Immune disease	1	2	3	71	0.00582488	0.187826	ENSBGRG00000023768(MAF)	ENSBGRG00000017549(TLR2),ENSBGRG00000019265	http://www.kegg.jp/kegg-bin/show_pathway?map=map05321&multi_query=K06752+%23FFFFFF,green%0d%0aK10159+%23FFFFFF,green%0d%0aK09035+%23FFFFFF,red%0d%0a
BP	GO:0086026	atrial cardiac muscle cell to AV node cell signaling	0	2	2	8	-	ENSBGRG00000011476(KCNN2),ENSBGRG00000012965(SCN3B)	0.000666258	0.201836		ko04151	PI3K-Akt signaling pathway	Environmental Information Processing	Signal transduction	4	2	6	326	0.00622786	0.187826	ENSBGRG00000026658(PIK3R5),ENSBGRG00000015380(CD19),ENSBGRG00000000523(NR4A1),ENSBGRG00000000772(COMP)	ENSBGRG00000017549(TLR2),ENSBGRG00000013093(FGF7)	http://www.kegg.jp/kegg-bin/show_pathway?map=map04151&multi_query=K04465+%23FFFFFF,red%0d%0aK04358+%23FFFFFF,green%0d%0aK06465+%23FFFFFF,red%0d%0aK04659+%23FFFFFF,red%0d%0aK21290+%23FFFFFF,red%0d%0aK10159+%23FFFFFF,green%0d%0a
BP	GO:0086066	atrial cardiac muscle cell to AV node cell communication	0	2	2	8	-	ENSBGRG00000011476(KCNN2),ENSBGRG00000012965(SCN3B)	0.000666258	0.201836		ko04657	IL-17 signaling pathway	Organismal Systems	Immune system	2	1	3	80	0.00810878	0.187826	ENSBGRG00000009096(FOS),ENSBGRG00000022164(FOSB)	ENSBGRG00000015786(CXCL10)	http://www.kegg.jp/kegg-bin/show_pathway?map=map04657&multi_query=K04379+%23FFFFFF,red%0d%0aK12671+%23FFFFFF,green%0d%0aK09029+%23FFFFFF,red%0d%0a
BP	GO:0050793	regulation of developmental process	10	8	18	1703	ENSBGRG00000000772(COMP),ENSBGRG00000003116(IRF1),ENSBGRG00000003222(THPO),ENSBGRG00000008094(KLF10),ENSBGRG00000009096(FOS),ENSBGRG00000010987(ANGPTL7),ENSBGRG00000012849(SLC45A3),ENSBGRG00000017135(PLEKHO1),ENSBGRG00000023768(MAF),ENSBGRG00000024152(HYAL1)	ENSBGRG00000002144(SOX10),ENSBGRG00000002408(FRZB),ENSBGRG00000003810,ENSBGRG00000013093(FGF7),ENSBGRG00000015158(DPYSL3),ENSBGRG00000015786(CXCL10),ENSBGRG00000019092(S1PR3),ENSBGRG00000020868(HTR2A)	0.00125153	0.201836		ko04620	Toll-like receptor signaling pathway	Organismal Systems	Immune system	1	2	3	88	0.0105262	0.187826	ENSBGRG00000009096(FOS)	ENSBGRG00000015786(CXCL10),ENSBGRG00000017549(TLR2)	http://www.kegg.jp/kegg-bin/show_pathway?map=map04620&multi_query=K04379+%23FFFFFF,red%0d%0aK10159+%23FFFFFF,green%0d%0aK12671+%23FFFFFF,green%0d%0a
BP	GO:0002755	MyD88-dependent toll-like receptor signaling pathway	1	1	2	13	ENSBGRG00000003116(IRF1)	ENSBGRG00000017549(TLR2)	0.00182649	0.201836		ko04640	Hematopoietic cell lineage	Organismal Systems	Immune system	2	1	3	91	0.0115295	0.187826	ENSBGRG00000003222(THPO),ENSBGRG00000015380(CD19)	ENSBGRG00000019265	http://www.kegg.jp/kegg-bin/show_pathway?map=map04640&multi_query=K06752+%23FFFFFF,green%0d%0aK06854+%23FFFFFF,red%0d%0aK06465+%23FFFFFF,red%0d%0a
BP	GO:0090026	positive regulation of monocyte chemotaxis	1	1	2	13	ENSBGRG00000006266(S100A14)	ENSBGRG00000015786(CXCL10)	0.00182649	0.201836		ko04658	Th1 and Th2 cell differentiation	Organismal Systems	Immune system	2	1	3	93	0.0122281	0.187826	ENSBGRG00000009096(FOS),ENSBGRG00000023768(MAF)	ENSBGRG00000019265	http://www.kegg.jp/kegg-bin/show_pathway?map=map04658&multi_query=K06752+%23FFFFFF,green%0d%0aK04379+%23FFFFFF,red%0d%0aK09035+%23FFFFFF,red%0d%0a
BP	GO:0051647	nucleus localization	2	0	2	14	ENSBGRG00000014538(PABPC1L),ENSBGRG00000026122(SLIT1)	-	0.00212409	0.201836		ko04726	Serotonergic synapse	Organismal Systems	Nervous system	0	3	3	95	0.0129507	0.187826	-	ENSBGRG00000011476(KCNN2),ENSBGRG00000020868(HTR2A),ENSBGRG00000018072(HTR4)	http://www.kegg.jp/kegg-bin/show_pathway?map=map04726&multi_query=K04160+%23FFFFFF,green%0d%0aK04943+%23FFFFFF,green%0d%0aK04157+%23FFFFFF,green%0d%0a
BP	GO:0071677	positive regulation of mononuclear cell migration	1	1	2	15	ENSBGRG00000006266(S100A14)	ENSBGRG00000015786(CXCL10)	0.00244304	0.201836		ko05323	Rheumatoid arthritis	Human Diseases	Immune disease	1	2	3	96	0.013321	0.187826	ENSBGRG00000009096(FOS)	ENSBGRG00000017549(TLR2),ENSBGRG00000019265	http://www.kegg.jp/kegg-bin/show_pathway?map=map05323&multi_query=K06752+%23FFFFFF,green%0d%0aK04379+%23FFFFFF,red%0d%0aK10159+%23FFFFFF,green%0d%0a
BP	GO:0071496	cellular response to external stimulus	4	1	5	191	ENSBGRG00000001080(ELAPOR1),ENSBGRG00000003116(IRF1),ENSBGRG00000008094(KLF10),ENSBGRG00000009096(FOS)	ENSBGRG00000001621(AQP3)	0.00255372	0.201836		ko05145	Toxoplasmosis	Human Diseases	Infectious disease: parasitic	1	2	3	105	0.0169274	0.21054	ENSBGRG00000026658(PIK3R5)	ENSBGRG00000017549(TLR2),ENSBGRG00000019265	http://www.kegg.jp/kegg-bin/show_pathway?map=map05145&multi_query=K21290+%23FFFFFF,red%0d%0aK06752+%23FFFFFF,green%0d%0aK10159+%23FFFFFF,green%0d%0a
BP	GO:0048518	positive regulation of biological process	19	12	31	3985	ENSBGRG00000000523(NR4A1),ENSBGRG00000000772(COMP),ENSBGRG00000001080(ELAPOR1),ENSBGRG00000002908(TIMELESS),ENSBGRG00000003116(IRF1),ENSBGRG00000003222(THPO),ENSBGRG00000006266(S100A14),ENSBGRG00000006339(ARRDC4),ENSBGRG00000007015(RPS6KA1),ENSBGRG00000008094(KLF10),ENSBGRG00000009096(FOS),ENSBGRG00000012849(SLC45A3),ENSBGRG00000014538(PABPC1L),ENSBGRG00000015380(CD19),ENSBGRG00000022164(FOSB),EN…	ENSBGRG00000001621(AQP3),ENSBGRG00000002144(SOX10),ENSBGRG00000002408(FRZB),ENSBGRG00000006084(IFNLR1),ENSBGRG00000012965(SCN3B),ENSBGRG00000013093(FGF7),ENSBGRG00000015158(DPYSL3),ENSBGRG00000015786(CXCL10),ENSBGRG00000017549(TLR2),ENSBGRG00000017845(TSSK4),ENSBGRG00000020868(HTR2A),ENSBGRG00000024245(CENPQ)	0.00268991	0.201836		ko05169	Epstein-Barr virus infection	Human Diseases	Infectious disease: viral	1	3	4	195	0.0179183	0.21054	ENSBGRG00000015380(CD19)	ENSBGRG00000015786(CXCL10),ENSBGRG00000019265,ENSBGRG00000017549(TLR2)	http://www.kegg.jp/kegg-bin/show_pathway?map=map05169&multi_query=K12671+%23FFFFFF,green%0d%0aK06465+%23FFFFFF,red%0d%0aK10159+%23FFFFFF,green%0d%0aK06752+%23FFFFFF,green%0d%0a
BP	GO:0090025	regulation of monocyte chemotaxis	1	1	2	16	ENSBGRG00000006266(S100A14)	ENSBGRG00000015786(CXCL10)	0.00278312	0.201836		ko04080	Neuroactive ligand-receptor interaction	Environmental Information Processing	Signaling molecules and interaction	2	3	5	318	0.0234188	0.254004	ENSBGRG00000003965,ENSBGRG00000000685(GABBR2)	ENSBGRG00000019092(S1PR3),ENSBGRG00000018072(HTR4),ENSBGRG00000020868(HTR2A)	http://www.kegg.jp/kegg-bin/show_pathway?map=map04080&multi_query=K04615+%23FFFFFF,red%0d%0aK05240+%23FFFFFF,red%0d%0aK04157+%23FFFFFF,green%0d%0aK04290+%23FFFFFF,green%0d%0aK04160+%23FFFFFF,green%0d%0a
BP	GO:0086019	cell-cell signaling involved in cardiac conduction	0	2	2	17	-	ENSBGRG00000011476(KCNN2),ENSBGRG00000012965(SCN3B)	0.00314413	0.201836		ko05144	Malaria	Human Diseases	Infectious disease: parasitic	1	1	2	51	0.0286501	0.277171	ENSBGRG00000000772(COMP)	ENSBGRG00000017549(TLR2)	http://www.kegg.jp/kegg-bin/show_pathway?map=map05144&multi_query=K10159+%23FFFFFF,green%0d%0aK04659+%23FFFFFF,red%0d%0a
BP	GO:0048856	anatomical structure development	15	13	28	3537	ENSBGRG00000000523(NR4A1),ENSBGRG00000000772(COMP),ENSBGRG00000002908(TIMELESS),ENSBGRG00000003116(IRF1),ENSBGRG00000003222(THPO),ENSBGRG00000008094(KLF10),ENSBGRG00000009096(FOS),ENSBGRG00000010987(ANGPTL7),ENSBGRG00000012849(SLC45A3),ENSBGRG00000014538(PABPC1L),ENSBGRG00000015380(CD19),ENSBGRG00000017135(PLEKHO1),ENSBGRG00000023768(MAF),ENSBGRG00000024152(HYAL1),ENSBGRG00000026122(SLIT1)	ENSBGRG00000001621(AQP3),ENSBGRG00000002063(HSPB7),ENSBGRG00000002144(SOX10),ENSBGRG00000002408(FRZB),ENSBGRG00000002918(PFDN5),ENSBGRG00000003810,ENSBGRG00000011326(SPAG17),ENSBGRG00000013093(FGF7),ENSBGRG00000015158(DPYSL3),ENSBGRG00000015786(CXCL10),ENSBGRG00000017845(TSSK4),ENSBGRG00000019092(S1PR3),ENSBGRG00000023448(DCX)	0.00388732	0.201836		ko04145	Phagosome	Cellular Processes	Transport and catabolism	1	2	3	131	0.0301541	0.277171	ENSBGRG00000000772(COMP)	ENSBGRG00000017549(TLR2),ENSBGRG00000019265	http://www.kegg.jp/kegg-bin/show_pathway?map=map04145&multi_query=K06752+%23FFFFFF,green%0d%0aK10159+%23FFFFFF,green%0d%0aK04659+%23FFFFFF,red%0d%0a
BP	GO:0051209	release of sequestered calcium ion into cytosol	1	2	3	65	ENSBGRG00000015380(CD19)	ENSBGRG00000015786(CXCL10),ENSBGRG00000020868(HTR2A)	0.00409581	0.201836		ko04929	GnRH secretion	Organismal Systems	Endocrine system	1	1	2	55	0.0329394	0.277171	ENSBGRG00000000685(GABBR2)	ENSBGRG00000011476(KCNN2)	http://www.kegg.jp/kegg-bin/show_pathway?map=map04929&multi_query=K04943+%23FFFFFF,green%0d%0aK04615+%23FFFFFF,red%0d%0a
BP	GO:0051283	negative regulation of sequestering of calcium ion	1	2	3	65	ENSBGRG00000015380(CD19)	ENSBGRG00000015786(CXCL10),ENSBGRG00000020868(HTR2A)	0.00409581	0.201836		ko05031	Amphetamine addiction	Human Diseases	Substance dependence	2	0	2	57	0.0351731	0.277171	ENSBGRG00000022164(FOSB),ENSBGRG00000009096(FOS)	-	http://www.kegg.jp/kegg-bin/show_pathway?map=map05031&multi_query=K04379+%23FFFFFF,red%0d%0aK09029+%23FFFFFF,red%0d%0a
BP	GO:0009615	response to virus	2	3	5	215	ENSBGRG00000003116(IRF1),ENSBGRG00000024152(HYAL1)	ENSBGRG00000006084(IFNLR1),ENSBGRG00000015786(CXCL10),ENSBGRG00000017549(TLR2)	0.00423896	0.201836		ko04122	Sulfur relay system	Genetic Information Processing	Folding, sorting and degradation	1	0	1	7	0.0358791	0.277171	ENSBGRG00000005144(MOCS3)	-	http://www.kegg.jp/kegg-bin/show_pathway?map=map04122&multi_query=K11996+%23FFFFFF,red%0d%0a
BP	GO:0051282	regulation of sequestering of calcium ion	1	2	3	67	ENSBGRG00000015380(CD19)	ENSBGRG00000015786(CXCL10),ENSBGRG00000020868(HTR2A)	0.00446047	0.201836		ko04662	B cell receptor signaling pathway	Organismal Systems	Immune system	2	0	2	61	0.0398118	0.277171	ENSBGRG00000009096(FOS),ENSBGRG00000015380(CD19)	-	http://www.kegg.jp/kegg-bin/show_pathway?map=map04662&multi_query=K06465+%23FFFFFF,red%0d%0aK04379+%23FFFFFF,red%0d%0a
BP	GO:0051216	cartilage development	3	1	4	135	ENSBGRG00000000772(COMP),ENSBGRG00000023768(MAF),ENSBGRG00000024152(HYAL1)	ENSBGRG00000002408(FRZB)	0.00450349	0.201836		ko04010	MAPK signaling pathway	Environmental Information Processing	Signal transduction	3	1	4	257	0.0433561	0.277171	ENSBGRG00000007015(RPS6KA1),ENSBGRG00000009096(FOS),ENSBGRG00000000523(NR4A1)	ENSBGRG00000013093(FGF7)	http://www.kegg.jp/kegg-bin/show_pathway?map=map04010&multi_query=K04358+%23FFFFFF,green%0d%0aK04373+%23FFFFFF,red%0d%0aK04379+%23FFFFFF,red%0d%0aK04465+%23FFFFFF,red%0d%0a
BP	GO:0045672	positive regulation of osteoclast differentiation	2	0	2	21	ENSBGRG00000008094(KLF10),ENSBGRG00000009096(FOS)	-	0.00479323	0.201836		ko04742	Taste transduction	Organismal Systems	Sensory system	2	0	2	65	0.04467	0.277171	ENSBGRG00000000685(GABBR2),ENSBGRG00000019550(SCN3A)	-	http://www.kegg.jp/kegg-bin/show_pathway?map=map04742&multi_query=K04615+%23FFFFFF,red%0d%0aK04836+%23FFFFFF,red%0d%0a
BP	GO:0051208	sequestering of calcium ion	1	2	3	69	ENSBGRG00000015380(CD19)	ENSBGRG00000015786(CXCL10),ENSBGRG00000020868(HTR2A)	0.00484422	0.201836		ko04917	Prolactin signaling pathway	Organismal Systems	Endocrine system	2	0	2	66	0.0459176	0.277171	ENSBGRG00000003116(IRF1),ENSBGRG00000009096(FOS)	-	http://www.kegg.jp/kegg-bin/show_pathway?map=map04917&multi_query=K04379+%23FFFFFF,red%0d%0aK09444+%23FFFFFF,red%0d%0a
BP	GO:0002143	tRNA wobble position uridine thiolation	1	0	1	1	ENSBGRG00000005144(MOCS3)	-	0.00496223	0.201836		ko05133	Pertussis	Human Diseases	Infectious disease: bacterial	2	0	2	67	0.047178	0.277171	ENSBGRG00000009096(FOS),ENSBGRG00000003116(IRF1)	-	http://www.kegg.jp/kegg-bin/show_pathway?map=map05133&multi_query=K09444+%23FFFFFF,red%0d%0aK04379+%23FFFFFF,red%0d%0a
BP	GO:0034124	regulation of MyD88-dependent toll-like receptor signaling pathway	1	0	1	1	ENSBGRG00000003116(IRF1)	-	0.00496223	0.201836		ko04918	Thyroid hormone synthesis	Organismal Systems	Endocrine system	1	1	2	67	0.047178	0.277171	ENSBGRG00000007032(IYD)	ENSBGRG00000003388(GPX7)	http://www.kegg.jp/kegg-bin/show_pathway?map=map04918&multi_query=K00432+%23FFFFFF,green%0d%0aK17231+%23FFFFFF,red%0d%0a
BP	GO:0035733	hepatic stellate cell activation	1	0	1	1	ENSBGRG00000007015(RPS6KA1)	-	0.00496223	0.201836		ko05207	Chemical carcinogenesis - receptor activation	Human Diseases	Cancer: overview	2	1	3	166	0.0545049	0.307408	ENSBGRG00000009096(FOS),ENSBGRG00000007015(RPS6KA1)	ENSBGRG00000013093(FGF7)	http://www.kegg.jp/kegg-bin/show_pathway?map=map05207&multi_query=K04373+%23FFFFFF,red%0d%0aK04379+%23FFFFFF,red%0d%0aK04358+%23FFFFFF,green%0d%0a
BP	GO:0036331	avascular cornea development in camera-type eye	1	0	1	1	ENSBGRG00000010987(ANGPTL7)	-	0.00496223	0.201836		ko05235	PD-L1 expression and PD-1 checkpoint pathway in cancer	Human Diseases	Cancer: overview	1	1	2	85	0.0718943	0.389888	ENSBGRG00000009096(FOS)	ENSBGRG00000017549(TLR2)	http://www.kegg.jp/kegg-bin/show_pathway?map=map05235&multi_query=K10159+%23FFFFFF,green%0d%0aK04379+%23FFFFFF,red%0d%0a
BP	GO:0038124	toll-like receptor TLR6:TLR2 signaling pathway	0	1	1	1	-	ENSBGRG00000017549(TLR2)	0.00496223	0.201836		ko04024	cAMP signaling pathway	Environmental Information Processing	Signal transduction	2	1	3	200	0.0848928	0.430691	ENSBGRG00000009096(FOS),ENSBGRG00000000685(GABBR2)	ENSBGRG00000018072(HTR4)	http://www.kegg.jp/kegg-bin/show_pathway?map=map04024&multi_query=K04615+%23FFFFFF,red%0d%0aK04160+%23FFFFFF,green%0d%0aK04379+%23FFFFFF,red%0d%0a
BP	GO:0061737	leukotriene signaling pathway	1	0	1	1	ENSBGRG00000004500(RGS1)	-	0.00496223	0.201836		ko04725	Cholinergic synapse	Organismal Systems	Nervous system	2	0	2	94	0.0855272	0.430691	ENSBGRG00000026658(PIK3R5),ENSBGRG00000009096(FOS)	-	http://www.kegg.jp/kegg-bin/show_pathway?map=map04725&multi_query=K21290+%23FFFFFF,red%0d%0aK04379+%23FFFFFF,red%0d%0a
BP	GO:0070367	negative regulation of hepatocyte differentiation	0	1	1	1	-	ENSBGRG00000002408(FRZB)	0.00496223	0.201836		ko00531	Glycosaminoglycan degradation	Metabolism	Glycan biosynthesis and metabolism	1	0	1	19	0.0944909	0.446335	ENSBGRG00000024152(HYAL1)	-	http://www.kegg.jp/kegg-bin/show_pathway?map=map00531&multi_query=K01197+%23FFFFFF,red%0d%0a
BP	GO:0090649	response to oxygen-glucose deprivation	0	1	1	1	-	ENSBGRG00000001621(AQP3)	0.00496223	0.201836		ko05142	Chagas disease	Human Diseases	Infectious disease: parasitic	1	1	2	101	0.0966316	0.446335	ENSBGRG00000009096(FOS)	ENSBGRG00000017549(TLR2)	http://www.kegg.jp/kegg-bin/show_pathway?map=map05142&multi_query=K10159+%23FFFFFF,green%0d%0aK04379+%23FFFFFF,red%0d%0a
BP	GO:0090650	cellular response to oxygen-glucose deprivation	0	1	1	1	-	ENSBGRG00000001621(AQP3)	0.00496223	0.201836		ko04380	Osteoclast differentiation	Organismal Systems	Development and regeneration	2	0	2	103	0.0998779	0.446335	ENSBGRG00000022164(FOSB),ENSBGRG00000009096(FOS)	-	http://www.kegg.jp/kegg-bin/show_pathway?map=map04380&multi_query=K04379+%23FFFFFF,red%0d%0aK09029+%23FFFFFF,red%0d%0a
BP	GO:1901346	negative regulation of vasculature development involved in avascular cornea development in camera-type eye	1	0	1	1	ENSBGRG00000010987(ANGPTL7)	-	0.00496223	0.201836		ko04020	Calcium signaling pathway	Environmental Information Processing	Signal transduction	0	3	3	219	0.104461	0.446335	-	ENSBGRG00000013093(FGF7),ENSBGRG00000020868(HTR2A),ENSBGRG00000018072(HTR4)	http://www.kegg.jp/kegg-bin/show_pathway?map=map04020&multi_query=K04358+%23FFFFFF,green%0d%0aK04160+%23FFFFFF,green%0d%0aK04157+%23FFFFFF,green%0d%0a
BP	GO:1901551	negative regulation of endothelial cell development	0	1	1	1	-	ENSBGRG00000019092(S1PR3)	0.00496223	0.201836		ko04714	Thermogenesis	Organismal Systems	Environmental adaptation	2	1	3	219	0.104461	0.446335	ENSBGRG00000007015(RPS6KA1),ENSBGRG00000005360(NDUFA4L2)	ENSBGRG00000017364	http://www.kegg.jp/kegg-bin/show_pathway?map=map04714&multi_query=K03948+%23FFFFFF,red%0d%0aK18179+%23FFFFFF,green%0d%0aK04373+%23FFFFFF,red%0d%0a
BP	GO:1903141	negative regulation of establishment of endothelial barrier	0	1	1	1	-	ENSBGRG00000019092(S1PR3)	0.00496223	0.201836		ko04659	Th17 cell differentiation	Organismal Systems	Immune system	1	1	2	110	0.111477	0.462303	ENSBGRG00000009096(FOS)	ENSBGRG00000019265	http://www.kegg.jp/kegg-bin/show_pathway?map=map04659&multi_query=K04379+%23FFFFFF,red%0d%0aK06752+%23FFFFFF,green%0d%0a
BP	GO:2000489	regulation of hepatic stellate cell activation	1	0	1	1	ENSBGRG00000007015(RPS6KA1)	-	0.00496223	0.201836		ko04915	Estrogen signaling pathway	Organismal Systems	Endocrine system	2	0	2	120	0.128627	0.518185	ENSBGRG00000000685(GABBR2),ENSBGRG00000009096(FOS)	-	http://www.kegg.jp/kegg-bin/show_pathway?map=map04915&multi_query=K04615+%23FFFFFF,red%0d%0aK04379+%23FFFFFF,red%0d%0a
BP	GO:2000491	positive regulation of hepatic stellate cell activation	1	0	1	1	ENSBGRG00000007015(RPS6KA1)	-	0.00496223	0.201836		ko04921	Oxytocin signaling pathway	Organismal Systems	Endocrine system	2	0	2	124	0.135657	0.531323	ENSBGRG00000009096(FOS),ENSBGRG00000026658(PIK3R5)	-	http://www.kegg.jp/kegg-bin/show_pathway?map=map04921&multi_query=K04379+%23FFFFFF,red%0d%0aK21290+%23FFFFFF,red%0d%0a
BP	GO:0006928	movement of cell or subcellular component	5	9	14	1330	ENSBGRG00000000523(NR4A1),ENSBGRG00000006266(S100A14),ENSBGRG00000017135(PLEKHO1),ENSBGRG00000024152(HYAL1),ENSBGRG00000026122(SLIT1)	ENSBGRG00000002144(SOX10),ENSBGRG00000011326(SPAG17),ENSBGRG00000011476(KCNN2),ENSBGRG00000012965(SCN3B),ENSBGRG00000013093(FGF7),ENSBGRG00000015158(DPYSL3),ENSBGRG00000015786(CXCL10),ENSBGRG00000017845(TSSK4),ENSBGRG00000023448(DCX)	0.00504881	0.201836		ko05224	Breast cancer	Human Diseases	Cancer: specific types	1	1	2	131	0.148163	0.534692	ENSBGRG00000009096(FOS)	ENSBGRG00000013093(FGF7)	http://www.kegg.jp/kegg-bin/show_pathway?map=map05224&multi_query=K04358+%23FFFFFF,green%0d%0aK04379+%23FFFFFF,red%0d%0a
BP	GO:0002548	monocyte chemotaxis	1	1	2	22	ENSBGRG00000006266(S100A14)	ENSBGRG00000015786(CXCL10)	0.00525574	0.201836		ko05135	Yersinia infection	Human Diseases	Infectious disease: bacterial	2	0	2	132	0.14997	0.534692	ENSBGRG00000007015(RPS6KA1),ENSBGRG00000009096(FOS)	-	http://www.kegg.jp/kegg-bin/show_pathway?map=map05135&multi_query=K04373+%23FFFFFF,red%0d%0aK04379+%23FFFFFF,red%0d%0a
BP	GO:1901700	response to oxygen-containing compound	6	4	10	791	ENSBGRG00000000523(NR4A1),ENSBGRG00000002908(TIMELESS),ENSBGRG00000006266(S100A14),ENSBGRG00000009096(FOS),ENSBGRG00000021293(RGS10),ENSBGRG00000024152(HYAL1)	ENSBGRG00000001621(AQP3),ENSBGRG00000015786(CXCL10),ENSBGRG00000017549(TLR2),ENSBGRG00000020868(HTR2A)	0.00535599	0.201836		ko05162	Measles	Human Diseases	Infectious disease: viral	1	1	2	134	0.153597	0.534692	ENSBGRG00000009096(FOS)	ENSBGRG00000017549(TLR2)	http://www.kegg.jp/kegg-bin/show_pathway?map=map05162&multi_query=K04379+%23FFFFFF,red%0d%0aK10159+%23FFFFFF,green%0d%0a
BP	GO:0032501	multicellular organismal process	15	17	32	4350	ENSBGRG00000000523(NR4A1),ENSBGRG00000000772(COMP),ENSBGRG00000002908(TIMELESS),ENSBGRG00000003116(IRF1),ENSBGRG00000003222(THPO),ENSBGRG00000008094(KLF10),ENSBGRG00000009096(FOS),ENSBGRG00000010987(ANGPTL7),ENSBGRG00000012849(SLC45A3),ENSBGRG00000014538(PABPC1L),ENSBGRG00000015380(CD19),ENSBGRG00000023768(MAF),ENSBGRG00000024152(HYAL1),ENSBGRG00000025051(SCAMP5),ENSBGRG00000026122(SLIT1)	ENSBGRG00000001621(AQP3),ENSBGRG00000002063(HSPB7),ENSBGRG00000002144(SOX10),ENSBGRG00000002408(FRZB),ENSBGRG00000002918(PFDN5),ENSBGRG00000003810,ENSBGRG00000009542(SCN11A),ENSBGRG00000011326(SPAG17),ENSBGRG00000011476(KCNN2),ENSBGRG00000012965(SCN3B),ENSBGRG00000013093(FGF7),ENSBGRG00000015158(DPYSL3),ENSBGRG00000015786(CXCL10),ENSBGRG00000017549(TLR2),ENSBGRG00000017845(TSSK4),ENSBGRG000000190…	0.00564761	0.201836		ko04060	Cytokine-cytokine receptor interaction	Environmental Information Processing	Signaling molecules and interaction	1	2	3	265	0.158245	0.534692	ENSBGRG00000003222(THPO)	ENSBGRG00000006084(IFNLR1),ENSBGRG00000015786(CXCL10)	http://www.kegg.jp/kegg-bin/show_pathway?map=map04060&multi_query=K06854+%23FFFFFF,red%0d%0aK12671+%23FFFFFF,green%0d%0aK05140+%23FFFFFF,green%0d%0a
BP	GO:0044344	cellular response to fibroblast growth factor stimulus	2	1	3	73	ENSBGRG00000000523(NR4A1),ENSBGRG00000024152(HYAL1)	ENSBGRG00000013093(FGF7)	0.00567016	0.201836		ko05171	Coronavirus disease - COVID-19	Human Diseases	Infectious disease: viral	1	2	3	268	0.162021	0.534692	ENSBGRG00000009096(FOS)	ENSBGRG00000015786(CXCL10),ENSBGRG00000017549(TLR2)	http://www.kegg.jp/kegg-bin/show_pathway?map=map05171&multi_query=K04379+%23FFFFFF,red%0d%0aK10159+%23FFFFFF,green%0d%0aK12671+%23FFFFFF,green%0d%0a
BP	GO:0071774	response to fibroblast growth factor	2	1	3	73	ENSBGRG00000000523(NR4A1),ENSBGRG00000024152(HYAL1)	ENSBGRG00000013093(FGF7)	0.00567016	0.201836		ko05310	Asthma	Human Diseases	Immune disease	0	1	1	34	0.162893	0.534692	-	ENSBGRG00000019265	http://www.kegg.jp/kegg-bin/show_pathway?map=map05310&multi_query=K06752+%23FFFFFF,green%0d%0a
BP	GO:0030154	cell differentiation	12	9	21	2434	ENSBGRG00000000523(NR4A1),ENSBGRG00000000772(COMP),ENSBGRG00000003116(IRF1),ENSBGRG00000003222(THPO),ENSBGRG00000008094(KLF10),ENSBGRG00000009096(FOS),ENSBGRG00000012849(SLC45A3),ENSBGRG00000014538(PABPC1L),ENSBGRG00000015380(CD19),ENSBGRG00000017135(PLEKHO1),ENSBGRG00000023768(MAF),ENSBGRG00000026122(SLIT1)	ENSBGRG00000002144(SOX10),ENSBGRG00000002408(FRZB),ENSBGRG00000011326(SPAG17),ENSBGRG00000015158(DPYSL3),ENSBGRG00000015786(CXCL10),ENSBGRG00000017845(TSSK4),ENSBGRG00000019092(S1PR3),ENSBGRG00000020868(HTR2A),ENSBGRG00000023448(DCX)	0.00574096	0.201836		ko05340	Primary immunodeficiency	Human Diseases	Immune disease	1	0	1	35	0.167269	0.534692	ENSBGRG00000015380(CD19)	-	http://www.kegg.jp/kegg-bin/show_pathway?map=map05340&multi_query=K06465+%23FFFFFF,red%0d%0a
BP	GO:0032502	developmental process	15	14	29	3813	ENSBGRG00000000523(NR4A1),ENSBGRG00000000772(COMP),ENSBGRG00000002908(TIMELESS),ENSBGRG00000003116(IRF1),ENSBGRG00000003222(THPO),ENSBGRG00000008094(KLF10),ENSBGRG00000009096(FOS),ENSBGRG00000010987(ANGPTL7),ENSBGRG00000012849(SLC45A3),ENSBGRG00000014538(PABPC1L),ENSBGRG00000015380(CD19),ENSBGRG00000017135(PLEKHO1),ENSBGRG00000023768(MAF),ENSBGRG00000024152(HYAL1),ENSBGRG00000026122(SLIT1)	ENSBGRG00000001621(AQP3),ENSBGRG00000002063(HSPB7),ENSBGRG00000002144(SOX10),ENSBGRG00000002408(FRZB),ENSBGRG00000002918(PFDN5),ENSBGRG00000003810,ENSBGRG00000011326(SPAG17),ENSBGRG00000013093(FGF7),ENSBGRG00000015158(DPYSL3),ENSBGRG00000015786(CXCL10),ENSBGRG00000017845(TSSK4),ENSBGRG00000019092(S1PR3),ENSBGRG00000020868(HTR2A),ENSBGRG00000023448(DCX)	0.00585544	0.201836		ko05161	Hepatitis B	Human Diseases	Infectious disease: viral	1	1	2	145	0.173843	0.534692	ENSBGRG00000009096(FOS)	ENSBGRG00000017549(TLR2)	http://www.kegg.jp/kegg-bin/show_pathway?map=map05161&multi_query=K04379+%23FFFFFF,red%0d%0aK10159+%23FFFFFF,green%0d%0a
BP	GO:0009991	response to extracellular stimulus	3	2	5	234	ENSBGRG00000001080(ELAPOR1),ENSBGRG00000008094(KLF10),ENSBGRG00000009096(FOS)	ENSBGRG00000001621(AQP3),ENSBGRG00000018072(HTR4)	0.00604748	0.201836		ko05164	Influenza A	Human Diseases	Infectious disease: viral	0	2	2	148	0.179443	0.534692	-	ENSBGRG00000019265,ENSBGRG00000015786(CXCL10)	http://www.kegg.jp/kegg-bin/show_pathway?map=map05164&multi_query=K06752+%23FFFFFF,green%0d%0aK12671+%23FFFFFF,green%0d%0a
BP	GO:0009605	response to external stimulus	9	6	15	1519	ENSBGRG00000000523(NR4A1),ENSBGRG00000001080(ELAPOR1),ENSBGRG00000003116(IRF1),ENSBGRG00000004500(RGS1),ENSBGRG00000006266(S100A14),ENSBGRG00000008094(KLF10),ENSBGRG00000009096(FOS),ENSBGRG00000024152(HYAL1),ENSBGRG00000026122(SLIT1)	ENSBGRG00000001621(AQP3),ENSBGRG00000006084(IFNLR1),ENSBGRG00000013093(FGF7),ENSBGRG00000015786(CXCL10),ENSBGRG00000017549(TLR2),ENSBGRG00000018072(HTR4)	0.00660148	0.201836		ko04932	Non-alcoholic fatty liver disease	Human Diseases	Endocrine and metabolic disease	2	0	2	154	0.190729	0.534692	ENSBGRG00000005360(NDUFA4L2),ENSBGRG00000009096(FOS)	-	http://www.kegg.jp/kegg-bin/show_pathway?map=map04932&multi_query=K04379+%23FFFFFF,red%0d%0aK03948+%23FFFFFF,red%0d%0a
BP	GO:0051281	positive regulation of release of sequestered calcium ion into cytosol	1	1	2	25	ENSBGRG00000015380(CD19)	ENSBGRG00000015786(CXCL10)	0.0067606	0.201836		ko05152	Tuberculosis	Human Diseases	Infectious disease: bacterial	0	2	2	156	0.194514	0.534692	-	ENSBGRG00000017549(TLR2),ENSBGRG00000019265	http://www.kegg.jp/kegg-bin/show_pathway?map=map05152&multi_query=K10159+%23FFFFFF,green%0d%0aK06752+%23FFFFFF,green%0d%0a
BP	GO:0097553	calcium ion transmembrane import into cytosol	1	2	3	78	ENSBGRG00000015380(CD19)	ENSBGRG00000015786(CXCL10),ENSBGRG00000020868(HTR2A)	0.00681475	0.201836		ko04062	Chemokine signaling pathway	Organismal Systems	Immune system	1	1	2	157	0.19641	0.534692	ENSBGRG00000026658(PIK3R5)	ENSBGRG00000015786(CXCL10)	http://www.kegg.jp/kegg-bin/show_pathway?map=map04062&multi_query=K12671+%23FFFFFF,green%0d%0aK21290+%23FFFFFF,red%0d%0a
BP	GO:0051607	defense response to virus	1	3	4	153	ENSBGRG00000003116(IRF1)	ENSBGRG00000006084(IFNLR1),ENSBGRG00000015786(CXCL10),ENSBGRG00000017549(TLR2)	0.00699005	0.201836		ko04962	Vasopressin-regulated water reabsorption	Organismal Systems	Excretory system	0	1	1	42	0.197289	0.534692	-	ENSBGRG00000001621(AQP3)	http://www.kegg.jp/kegg-bin/show_pathway?map=map04962&multi_query=K09876+%23FFFFFF,green%0d%0a
BP	GO:0070098	chemokine-mediated signaling pathway	1	1	2	26	ENSBGRG00000003222(THPO)	ENSBGRG00000015786(CXCL10)	0.00730067	0.201836		ko04630	JAK-STAT signaling pathway	Environmental Information Processing	Signal transduction	1	1	2	159	0.20021	0.534692	ENSBGRG00000003222(THPO)	ENSBGRG00000006084(IFNLR1)	http://www.kegg.jp/kegg-bin/show_pathway?map=map04630&multi_query=K06854+%23FFFFFF,red%0d%0aK05140+%23FFFFFF,green%0d%0a
BP	GO:0048869	cellular developmental process	12	9	21	2489	ENSBGRG00000000523(NR4A1),ENSBGRG00000000772(COMP),ENSBGRG00000003116(IRF1),ENSBGRG00000003222(THPO),ENSBGRG00000008094(KLF10),ENSBGRG00000009096(FOS),ENSBGRG00000012849(SLC45A3),ENSBGRG00000014538(PABPC1L),ENSBGRG00000015380(CD19),ENSBGRG00000017135(PLEKHO1),ENSBGRG00000023768(MAF),ENSBGRG00000026122(SLIT1)	ENSBGRG00000002144(SOX10),ENSBGRG00000002408(FRZB),ENSBGRG00000011326(SPAG17),ENSBGRG00000015158(DPYSL3),ENSBGRG00000015786(CXCL10),ENSBGRG00000017845(TSSK4),ENSBGRG00000019092(S1PR3),ENSBGRG00000020868(HTR2A),ENSBGRG00000023448(DCX)	0.00745991	0.201836		ko00514	Other types of O-glycan biosynthesis	Metabolism	Glycan biosynthesis and metabolism	0	1	1	44	0.20567	0.534692	-	ENSBGRG00000021905(GXYLT2)	http://www.kegg.jp/kegg-bin/show_pathway?map=map00514&multi_query=K13676+%23FFFFFF,green%0d%0a
BP	GO:0048513	animal organ development	12	7	19	2164	ENSBGRG00000000523(NR4A1),ENSBGRG00000000772(COMP),ENSBGRG00000002908(TIMELESS),ENSBGRG00000003116(IRF1),ENSBGRG00000003222(THPO),ENSBGRG00000008094(KLF10),ENSBGRG00000009096(FOS),ENSBGRG00000010987(ANGPTL7),ENSBGRG00000015380(CD19),ENSBGRG00000023768(MAF),ENSBGRG00000024152(HYAL1),ENSBGRG00000026122(SLIT1)	ENSBGRG00000001621(AQP3),ENSBGRG00000002063(HSPB7),ENSBGRG00000002144(SOX10),ENSBGRG00000002408(FRZB),ENSBGRG00000002918(PFDN5),ENSBGRG00000013093(FGF7),ENSBGRG00000023448(DCX)	0.00750476	0.201836		ko05167	Kaposi sarcoma-associated herpesvirus infection	Human Diseases	Infectious disease: viral	2	0	2	164	0.209752	0.534692	ENSBGRG00000026658(PIK3R5),ENSBGRG00000009096(FOS)	-	http://www.kegg.jp/kegg-bin/show_pathway?map=map05167&multi_query=K04379+%23FFFFFF,red%0d%0aK21290+%23FFFFFF,red%0d%0a
BP	GO:0086065	cell communication involved in cardiac conduction	0	2	2	27	-	ENSBGRG00000011476(KCNN2),ENSBGRG00000012965(SCN3B)	0.00785962	0.201836		ko05030	Cocaine addiction	Human Diseases	Substance dependence	1	0	1	45	0.209829	0.534692	ENSBGRG00000022164(FOSB)	-	http://www.kegg.jp/kegg-bin/show_pathway?map=map05030&multi_query=K09029+%23FFFFFF,red%0d%0a
BP	GO:0050896	response to stimulus	23	17	40	5981	ENSBGRG00000000523(NR4A1),ENSBGRG00000000685(GABBR2),ENSBGRG00000000772(COMP),ENSBGRG00000001080(ELAPOR1),ENSBGRG00000002908(TIMELESS),ENSBGRG00000003116(IRF1),ENSBGRG00000003222(THPO),ENSBGRG00000003965,ENSBGRG00000004500(RGS1),ENSBGRG00000005251(TICRR),ENSBGRG00000006266(S100A14),ENSBGRG00000007015(RPS6KA1),ENSBGRG00000008094(KLF10),ENSBGRG00000009096(FOS),ENSBGRG00000010980(MILR1),ENSBGRG00000…	ENSBGRG00000001621(AQP3),ENSBGRG00000002144(SOX10),ENSBGRG00000002408(FRZB),ENSBGRG00000002689(RGS4),ENSBGRG00000002918(PFDN5),ENSBGRG00000003388(GPX7),ENSBGRG00000003810,ENSBGRG00000006084(IFNLR1),ENSBGRG00000013093(FGF7),ENSBGRG00000015158(DPYSL3),ENSBGRG00000015786(CXCL10),ENSBGRG00000017549(TLR2),ENSBGRG00000018072(HTR4),ENSBGRG00000019092(S1PR3),ENSBGRG00000019265,ENSBGRG00000020868(HTR2A),E…	0.00790236	0.201836		ko05330	Allograft rejection	Human Diseases	Immune disease	0	1	1	45	0.209829	0.534692	-	ENSBGRG00000019265	http://www.kegg.jp/kegg-bin/show_pathway?map=map05330&multi_query=K06752+%23FFFFFF,green%0d%0a
BP	GO:0031668	cellular response to extracellular stimulus	3	1	4	159	ENSBGRG00000001080(ELAPOR1),ENSBGRG00000008094(KLF10),ENSBGRG00000009096(FOS)	ENSBGRG00000001621(AQP3)	0.00798669	0.201836		ko00270	Cysteine and methionine metabolism	Metabolism	Amino acid metabolism	0	1	1	48	0.222179	0.534692	-	ENSBGRG00000023470(ENOPH1)	http://www.kegg.jp/kegg-bin/show_pathway?map=map00270&multi_query=K09880+%23FFFFFF,green%0d%0a
BP	GO:0007520	myoblast fusion	1	1	2	28	ENSBGRG00000017135(PLEKHO1)	ENSBGRG00000015786(CXCL10)	0.00843728	0.201836		ko04940	Type I diabetes mellitus	Human Diseases	Endocrine and metabolic disease	0	1	1	49	0.226253	0.534692	-	ENSBGRG00000019265	http://www.kegg.jp/kegg-bin/show_pathway?map=map04940&multi_query=K06752+%23FFFFFF,green%0d%0a
BP	GO:0002224	toll-like receptor signaling pathway	2	1	3	85	ENSBGRG00000003116(IRF1),ENSBGRG00000006266(S100A14)	ENSBGRG00000017549(TLR2)	0.00863292	0.201836		ko05332	Graft-versus-host disease	Human Diseases	Immune disease	0	1	1	49	0.226253	0.534692	-	ENSBGRG00000019265	http://www.kegg.jp/kegg-bin/show_pathway?map=map05332&multi_query=K06752+%23FFFFFF,green%0d%0a
BP	GO:0045834	positive regulation of lipid metabolic process	2	1	3	85	ENSBGRG00000012849(SLC45A3),ENSBGRG00000015380(CD19)	ENSBGRG00000020868(HTR2A)	0.00863292	0.201836		ko05130	Pathogenic Escherichia coli infection	Human Diseases	Infectious disease: bacterial	2	0	2	173	0.227048	0.534692	ENSBGRG00000009096(FOS),ENSBGRG00000025321(MYO1F)	-	http://www.kegg.jp/kegg-bin/show_pathway?map=map05130&multi_query=K10356+%23FFFFFF,red%0d%0aK04379+%23FFFFFF,red%0d%0a
BP	GO:0051179	localization	15	15	30	4097	ENSBGRG00000000523(NR4A1),ENSBGRG00000000772(COMP),ENSBGRG00000006266(S100A14),ENSBGRG00000006339(ARRDC4),ENSBGRG00000010980(MILR1),ENSBGRG00000012849(SLC45A3),ENSBGRG00000014538(PABPC1L),ENSBGRG00000015380(CD19),ENSBGRG00000017135(PLEKHO1),ENSBGRG00000019550(SCN3A),ENSBGRG00000022615(SLC15A1),ENSBGRG00000023579(TBC1D10A),ENSBGRG00000024152(HYAL1),ENSBGRG00000025051(SCAMP5),ENSBGRG00000026122(SLI…	ENSBGRG00000001621(AQP3),ENSBGRG00000002144(SOX10),ENSBGRG00000009542(SCN11A),ENSBGRG00000011326(SPAG17),ENSBGRG00000011476(KCNN2),ENSBGRG00000012965(SCN3B),ENSBGRG00000013093(FGF7),ENSBGRG00000015158(DPYSL3),ENSBGRG00000015786(CXCL10),ENSBGRG00000017549(TLR2),ENSBGRG00000017845(TSSK4),ENSBGRG00000020868(HTR2A),ENSBGRG00000023448(DCX),ENSBGRG00000023632,ENSBGRG00000024245(CENPQ)	0.00870932	0.201836		ko05134	Legionellosis	Human Diseases	Infectious disease: bacterial	0	1	1	50	0.230307	0.534692	-	ENSBGRG00000017549(TLR2)	http://www.kegg.jp/kegg-bin/show_pathway?map=map05134&multi_query=K10159+%23FFFFFF,green%0d%0a
BP	GO:0009893	positive regulation of metabolic process	16	5	21	2525	ENSBGRG00000000523(NR4A1),ENSBGRG00000001080(ELAPOR1),ENSBGRG00000002908(TIMELESS),ENSBGRG00000003116(IRF1),ENSBGRG00000003222(THPO),ENSBGRG00000006339(ARRDC4),ENSBGRG00000007015(RPS6KA1),ENSBGRG00000008094(KLF10),ENSBGRG00000009096(FOS),ENSBGRG00000012849(SLC45A3),ENSBGRG00000014538(PABPC1L),ENSBGRG00000015380(CD19),ENSBGRG00000022164(FOSB),ENSBGRG00000023579(TBC1D10A),ENSBGRG00000023768(MAF),EN…	ENSBGRG00000002144(SOX10),ENSBGRG00000006084(IFNLR1),ENSBGRG00000013093(FGF7),ENSBGRG00000017549(TLR2),ENSBGRG00000020868(HTR2A)	0.00880223	0.201836		ko04623	Cytosolic DNA-sensing pathway	Organismal Systems	Immune system	0	1	1	50	0.230307	0.534692	-	ENSBGRG00000015786(CXCL10)	http://www.kegg.jp/kegg-bin/show_pathway?map=map04623&multi_query=K12671+%23FFFFFF,green%0d%0a
BP	GO:0055085	transmembrane transport	4	7	11	989	ENSBGRG00000012849(SLC45A3),ENSBGRG00000015380(CD19),ENSBGRG00000019550(SCN3A),ENSBGRG00000022615(SLC15A1)	ENSBGRG00000001621(AQP3),ENSBGRG00000009542(SCN11A),ENSBGRG00000011476(KCNN2),ENSBGRG00000012965(SCN3B),ENSBGRG00000015786(CXCL10),ENSBGRG00000020868(HTR2A),ENSBGRG00000023632	0.00895587	0.201836		ko00480	Glutathione metabolism	Metabolism	Metabolism of other amino acids	0	1	1	51	0.23434	0.534692	-	ENSBGRG00000003388(GPX7)	http://www.kegg.jp/kegg-bin/show_pathway?map=map00480&multi_query=K00432+%23FFFFFF,green%0d%0a
BP	GO:0086002	cardiac muscle cell action potential involved in contraction	0	2	2	29	-	ENSBGRG00000011476(KCNN2),ENSBGRG00000012965(SCN3B)	0.00903344	0.201836		ko04720	Long-term potentiation	Organismal Systems	Nervous system	1	0	1	52	0.238353	0.534692	ENSBGRG00000007015(RPS6KA1)	-	http://www.kegg.jp/kegg-bin/show_pathway?map=map04720&multi_query=K04373+%23FFFFFF,red%0d%0a
BP	GO:1903727	positive regulation of phospholipid metabolic process	1	1	2	29	ENSBGRG00000015380(CD19)	ENSBGRG00000020868(HTR2A)	0.00903344	0.201836		ko05320	Autoimmune thyroid disease	Human Diseases	Immune disease	0	1	1	53	0.242345	0.534692	-	ENSBGRG00000019265	http://www.kegg.jp/kegg-bin/show_pathway?map=map05320&multi_query=K06752+%23FFFFFF,green%0d%0a
BP	GO:0060402	calcium ion transport into cytosol	1	2	3	87	ENSBGRG00000015380(CD19)	ENSBGRG00000015786(CXCL10),ENSBGRG00000020868(HTR2A)	0.00919968	0.201836		ko05202	Transcriptional misregulation in cancer	Human Diseases	Cancer: overview	2	0	2	183	0.2464	0.534692	ENSBGRG00000012849(SLC45A3),ENSBGRG00000023768(MAF)	-	http://www.kegg.jp/kegg-bin/show_pathway?map=map05202&multi_query=K15379+%23FFFFFF,red%0d%0aK09035+%23FFFFFF,red%0d%0a
BP	GO:0033563	dorsal/ventral axon guidance	1	0	1	2	ENSBGRG00000026122(SLIT1)	-	0.0099002	0.201836		ko04672	Intestinal immune network for IgA production	Organismal Systems	Immune system	0	1	1	55	0.250268	0.534692	-	ENSBGRG00000019265	http://www.kegg.jp/kegg-bin/show_pathway?map=map04672&multi_query=K06752+%23FFFFFF,green%0d%0a
BP	GO:0042495	detection of triacyl bacterial lipopeptide	0	1	1	2	-	ENSBGRG00000017549(TLR2)	0.0099002	0.201836		ko05417	Lipid and atherosclerosis	Human Diseases	Cardiovascular disease	1	1	2	185	0.250281	0.534692	ENSBGRG00000009096(FOS)	ENSBGRG00000017549(TLR2)	http://www.kegg.jp/kegg-bin/show_pathway?map=map05417&multi_query=K04379+%23FFFFFF,red%0d%0aK10159+%23FFFFFF,green%0d%0a
BP	GO:0042496	detection of diacyl bacterial lipopeptide	0	1	1	2	-	ENSBGRG00000017549(TLR2)	0.0099002	0.201836		ko04927	Cortisol synthesis and secretion	Organismal Systems	Endocrine system	1	0	1	57	0.25811	0.541765	ENSBGRG00000000523(NR4A1)	-	http://www.kegg.jp/kegg-bin/show_pathway?map=map04927&multi_query=K04465+%23FFFFFF,red%0d%0a
BP	GO:0070366	regulation of hepatocyte differentiation	0	1	1	2	-	ENSBGRG00000002408(FRZB)	0.0099002	0.201836		ko05170	Human immunodeficiency virus 1 infection	Human Diseases	Infectious disease: viral	1	1	2	191	0.261941	0.541765	ENSBGRG00000009096(FOS)	ENSBGRG00000017549(TLR2)	http://www.kegg.jp/kegg-bin/show_pathway?map=map05170&multi_query=K10159+%23FFFFFF,green%0d%0aK04379+%23FFFFFF,red%0d%0a
BP	GO:0098914	membrane repolarization during atrial cardiac muscle cell action potential	0	1	1	2	-	ENSBGRG00000011476(KCNN2)	0.0099002	0.201836		ko00590	Arachidonic acid metabolism	Metabolism	Lipid metabolism	0	1	1	62	0.277369	0.541765	-	ENSBGRG00000003388(GPX7)	http://www.kegg.jp/kegg-bin/show_pathway?map=map00590&multi_query=K00432+%23FFFFFF,green%0d%0a
BP	GO:1901740	negative regulation of myoblast fusion	0	1	1	2	-	ENSBGRG00000015786(CXCL10)	0.0099002	0.201836		ko05218	Melanoma	Human Diseases	Cancer: specific types	0	1	1	64	0.284935	0.541765	-	ENSBGRG00000013093(FGF7)	http://www.kegg.jp/kegg-bin/show_pathway?map=map05218&multi_query=K04358+%23FFFFFF,green%0d%0a
BP	GO:1904466	positive regulation of matrix metallopeptidase secretion	0	1	1	2	-	ENSBGRG00000017549(TLR2)	0.0099002	0.201836		ko05416	Viral myocarditis	Human Diseases	Cardiovascular disease	0	1	1	64	0.284935	0.541765	-	ENSBGRG00000019265	http://www.kegg.jp/kegg-bin/show_pathway?map=map05416&multi_query=K06752+%23FFFFFF,green%0d%0a
BP	GO:1904975	response to bleomycin	1	0	1	2	ENSBGRG00000002908(TIMELESS)	-	0.0099002	0.201836		ko05208	Chemical carcinogenesis - reactive oxygen species	Human Diseases	Cancer: overview	2	0	2	204	0.28723	0.541765	ENSBGRG00000009096(FOS),ENSBGRG00000005360(NDUFA4L2)	-	http://www.kegg.jp/kegg-bin/show_pathway?map=map05208&multi_query=K03948+%23FFFFFF,red%0d%0aK04379+%23FFFFFF,red%0d%0a
BP	GO:1904976	cellular response to bleomycin	1	0	1	2	ENSBGRG00000002908(TIMELESS)	-	0.0099002	0.201836		ko04622	RIG-I-like receptor signaling pathway	Organismal Systems	Immune system	0	1	1	67	0.29614	0.541765	-	ENSBGRG00000015786(CXCL10)	http://www.kegg.jp/kegg-bin/show_pathway?map=map04622&multi_query=K12671+%23FFFFFF,green%0d%0a
BP	GO:1990443	peptidyl-threonine autophosphorylation	0	1	1	2	-	ENSBGRG00000017845(TSSK4)	0.0099002	0.201836		ko04976	Bile secretion	Organismal Systems	Digestive system	0	1	1	68	0.299837	0.541765	-	ENSBGRG00000011476(KCNN2)	http://www.kegg.jp/kegg-bin/show_pathway?map=map04976&multi_query=K04943+%23FFFFFF,green%0d%0a
BP	GO:1990953	intramanchette transport	0	1	1	2	-	ENSBGRG00000011326(SPAG17)	0.0099002	0.201836		ko04540	Gap junction	Cellular Processes	Cellular community - eukaryotes	0	1	1	68	0.299837	0.541765	-	ENSBGRG00000020868(HTR2A)	http://www.kegg.jp/kegg-bin/show_pathway?map=map04540&multi_query=K04157+%23FFFFFF,green%0d%0a
BP	GO:0071675	regulation of mononuclear cell migration	1	1	2	31	ENSBGRG00000006266(S100A14)	ENSBGRG00000015786(CXCL10)	0.0102805	0.201836		ko05166	Human T-cell leukemia virus 1 infection	Human Diseases	Infectious disease: viral	1	1	2	214	0.306652	0.541765	ENSBGRG00000009096(FOS)	ENSBGRG00000019265	http://www.kegg.jp/kegg-bin/show_pathway?map=map05166&multi_query=K04379+%23FFFFFF,red%0d%0aK06752+%23FFFFFF,green%0d%0a
BP	GO:0002682	regulation of immune system process	7	3	10	876	ENSBGRG00000003116(IRF1),ENSBGRG00000003222(THPO),ENSBGRG00000006266(S100A14),ENSBGRG00000008094(KLF10),ENSBGRG00000009096(FOS),ENSBGRG00000010980(MILR1),ENSBGRG00000015380(CD19)	ENSBGRG00000001621(AQP3),ENSBGRG00000006084(IFNLR1),ENSBGRG00000015786(CXCL10)	0.0107071	0.201836		ko04115	p53 signaling pathway	Cellular Processes	Cell growth and death	0	1	1	70	0.307174	0.541765	-	ENSBGRG00000001310(GTSE1)	http://www.kegg.jp/kegg-bin/show_pathway?map=map04115&multi_query=K10129+%23FFFFFF,green%0d%0a
[truncated: 374 more rows]
