# Supplementary material for: Whole transcriptomic analysis revealed the effects of different dietary protein levels on the growth and development of Jersey-yak
Source: Research Square preprint supplement (doi:10.21203/rs.3.rs-7466956/v1), 2025-09-30
Supplement: Supplementary file 3 [file 715b1eca6c1e8c82b66a6683.xlsx]

## Sheet: Identified mRNAs
Gene_ID	LP1:read count	LP1:fpkm	LP2:read count	LP2:fpkm	LP3:read count	LP3:fpkm	MP1:read count	MP1:fpkm	MP2:read count	MP2:fpkm	MP3:read count	MP3:fpkm	HP1:read count	HP1:fpkm	HP2:read count	HP2:fpkm	HP3:read count	HP3:fpkm	Chromosome	Start Site	End Site	Direction	Length	Name
ENSBGRG00000000002	0	0	0	0	0	0	0	0	0	0	14	0.804944	0	0	0	0	0	0	1	611119	628199	+	1477	POU1F1
ENSBGRG00000000003	111	7.28311	90	4.98229	112	6.5079	103	5.48861	44	3.0263	31	1.48985	53	3.28052	78	5.44747	22	0.995942	1	633575	669855	-	1767	CHMP2B
ENSBGRG00000000004	14	0.717255	31	1.33999	66	2.99446	93	3.86955	57	3.06116	52	1.95136	50	2.41651	15	0.817982	76	2.68644	1	956005	1012265	+	2263	VGLL3
ENSBGRG00000000005	1	0.0825778	0	0	0	0	0	0	0	0	0	0	0	0	0	0	0	0	1	1082516	1083919	-	1404	-
ENSBGRG00000000006	0	0	0	0	0	0	0	0	0	0	0	0	0	0	0	0	0	0	1	1654163	1662582	-	1678	-
ENSBGRG00000000008	23	1.93935	0	0	21	1.56811	32	2.19134	30	2.65164	90	5.55851	139	11.0565	12	1.077	24	1.39623	1	2065581	3433780	-	1375	CADM2
ENSBGRG00000000009	0	0	0	0	0	0	0	0	0	0	0	0	0	0	0	0	0	0	1	2946929	2947690	-	564	-
ENSBGRG00000000011	0	0	0	0	0	0	0	0	0	0	0	0	0	0	0	0	0	0	1	5716191	5717373	+	1183	-
ENSBGRG00000000012	1030	58.0259	889	42.2551	1047	52.2349	706	32.3014	570	33.6608	802	33.0939	1006	53.4634	571	34.2395	430	16.7136	1	7172866	7503191	+	2058	GBE1
ENSBGRG00000000013	0	0	0	0	0	0	0	0	0	0	0	0	0	0	0	0	0	0	1	7552707	7554066	-	558	-
ENSBGRG00000000014	89	2.0079	185	3.52141	149	2.97692	283	5.18525	153	3.61833	44	0.727097	220	4.68218	220	5.28301	93	1.44761	1	9567210	10778605	+	5139	ROBO1
ENSBGRG00000000015	0	0	0	0	0	0	0	0	0	0	0	0	0	0	0	0	0	0	1	10426053	10427687	-	1635	-
ENSBGRG00000000017	38	0.951758	42	0.887534	108	2.3955	19	0.386481	23	0.60386	89	1.63276	31	0.732451	136	3.62567	14	0.241929	1	11912833	12631150	-	4629	ROBO2
ENSBGRG00000000020	1	0.32476	0	0	0	0	1	0.263751	0	0	0	0	0	0	1	0.345676	18	4.03322	1	12813104	12813460	+	357	-
ENSBGRG00000000021	0	0	0	0	0	0	0	0	8	0.547139	0	0	0	0	0	0	0	0	1	14126671	14212482	-	1777	LIPI
ENSBGRG00000000023	0	0	5	0.229946	0	0	0	0	0	0	0	0	0	0	27	1.56651	0	0	1	14212338	14234545	+	2127	RBM11
ENSBGRG00000000024	0	0	0	0	5	0.114899	0	0	21	0.571217	0	0	0	0	0	0	0	0	1	14280958	14389288	+	4468	-
ENSBGRG00000000025	264	19.966	248	15.8246	507	33.9567	341	20.9447	249	19.7402	170	9.41727	218	15.5531	242	19.481	234	12.2102	1	14404460	14414915	-	1533	HSPA13
ENSBGRG00000000026	26	1.3988	98	4.44838	23	1.09582	40	1.74773	28	1.57909	50	1.97034	112	5.68427	41	2.34787	20	0.742387	1	14535345	14716965	-	2155	-
ENSBGRG00000000027	1720	60.8159	1991	59.3954	1504	47.094	1597	45.8591	1987	73.6464	1422	36.8279	1581	52.7344	1979	74.4803	1673	40.8133	1	15063990	15067268	-	3279	NRIP1
ENSBGRG00000000028	0	0	13	6.23356	9	4.52972	9	4.15408	20	11.915	35	14.5699	0	0	0	0	12	4.70542	1	15073108	15073311	+	204	-
ENSBGRG00000000029	0	0	40	3.74785	0	0	19	1.71362	0	0	0	0	0	0	0	0	0	0	1	15085309	15086352	+	1044	-
ENSBGRG00000000031	9246	299.769	7002	191.535	9004	258.522	6736	177.364	9143	310.732	4895	116.245	5125	156.747	5419	187.007	4439	99.2968	1	16016068	16187193	+	3576	USP25
ENSBGRG00000000032	0	0	0	0	0	0	0	0	0	0	0	0	0	0	0	0	0	0	1	16040018	16041049	-	1032	-
ENSBGRG00000000037	54	4.21597	51	3.35944	47	3.24961	14	0.887695	33	2.70074	0	0	25	1.84127	68	5.65092	57	3.07041	1	17998079	18071143	+	1485	CXADR
ENSBGRG00000000038	137	13.2474	18	1.46851	131	11.2179	20	1.57063	27	2.73678	85	6.0203	73	6.65898	35	3.60235	16	1.06745	1	18071760	18087210	-	1199	BTG3
ENSBGRG00000000039	0	0	0	0	0	0	0	0	0	0	0	0	0	0	0	0	0	0	1	18134379	18135611	+	1233	-
ENSBGRG00000000041	0	0	0	0	23	1.63993	0	0	22	1.85676	0	0	0	0	0	0	0	0	1	18224576	18226015	-	1440	-
ENSBGRG00000000042	72	5.40999	168	10.6504	166	11.0459	125	7.62792	25	1.96911	135	7.42996	94	6.66294	327	26.1528	59	3.05868	1	18279578	18312043	-	1543	C21orf91
ENSBGRG00000000043	2	0.10139	50	2.13859	6	0.269367	40	1.64686	47	2.49762	52	1.93088	26	1.2434	0	0	160	5.59631	1	18845347	18869739	+	2287	CHODL
ENSBGRG00000000044	0	0	0	0	0	0	0	0	0	0	0	0	0	0	0	0	0	0	1	18871985	19027971	-	3063	TMPRSS15
ENSBGRG00000000046	0	0	0	0	0	0	0	0	0	0	0	0	0	0	0	0	0	0	1	21620424	21620582	+	159	-
ENSBGRG00000000047	24	1.10682	0	0	0	0	0	0	10	0.483426	0	0	0	0	0	0	0	0	1	21891032	22492928	+	2514	NCAM2
ENSBGRG00000000048	0	0	0	0	0	0	0	0	0	0	0	0	0	0	0	0	0	0	1	22099696	22100982	-	1287	-
ENSBGRG00000000050	0	0	0	0	0	0	0	0	0	0	0	0	0	0	0	0	0	0	1	22539986	22541005	-	1020	-
ENSBGRG00000000051	0	0	0	0	0	0	0	0	0	0	0	0	0	0	0	0	0	0	1	24726493	24728027	+	1535	-
ENSBGRG00000000052	0	0	0	0	2	0.174764	0	0	0	0	0	0	0	0	0	0	0	0	1	25361066	25362240	-	1175	-
ENSBGRG00000000053	0	0	0	0	0	0	0	0	0	0	0	0	0	0	0	0	0	0	1	25908374	25910132	-	1759	-
ENSBGRG00000000055	0	0	0	0	5	2.80529	0	0	0	0	0	0	0	0	0	0	0	0	1	26557505	26557806	-	183	-
ENSBGRG00000000058	527	43.8936	455	31.9739	648	47.7964	330	22.3222	403	35.1853	667	40.6916	346	27.1857	581	51.5079	358	20.5727	1	27342662	27370128	-	1392	MRPL39
ENSBGRG00000000059	502	30.6808	356	18.3572	586	31.7168	605	30.0296	410	26.2671	524	23.4575	420	24.2151	511	33.2423	269	11.3431	1	27413396	27506203	+	1897	JAM2
ENSBGRG00000000060	109	11.7013	251	22.7339	213	20.2495	127	11.0724	86	9.67765	186	14.6254	245	24.8111	230	26.281	99	7.33262	1	27511939	27521313	-	1080	-
ENSBGRG00000000061	626	30.7403	509	21.0885	580	25.2227	471	18.784	390	20.0754	427	15.3586	356	16.4914	749	39.1492	268	9.08001	1	27525032	27568278	+	2361	GABPA
ENSBGRG00000000062	2328	84.5836	4157	127.431	3248	104.508	3393	100.12	2318	88.284	3514	93.5176	2319	79.4836	2646	102.329	2789	69.9148	1	27698287	28045878	-	3191	APP
ENSBGRG00000000064	0	0	0	0	0	0	0	0	0	0	0	0	0	0	0	0	0	0	1	27860863	27861963	+	1101	-
ENSBGRG00000000067	552	16.0076	580	14.1908	332	8.52618	371	8.73762	361	10.9739	364	7.73173	234	6.40143	206	6.3586	384	7.68309	1	28282365	28447363	-	3998	-
ENSBGRG00000000068	535	15.3154	999	24.1287	432	10.9519	796	18.5063	338	10.1428	770	16.1456	589	15.9061	942	28.7034	778	15.3664	1	28754201	28762686	-	4050	ADAMTS1
ENSBGRG00000000069	147	4.08119	146	3.41992	135	3.31919	499	11.2513	278	8.09058	172	3.49773	121	3.16905	293	8.65853	323	6.18714	1	28866712	28926010	-	4176	ADAMTS5
ENSBGRG00000000074	49	2.53617	73	3.18785	47	2.15431	24	1.00885	74	4.01494	65	2.46424	66	3.22255	53	2.91988	19	0.678505	1	31267914	31287054	+	2240	N6AMT1
ENSBGRG00000000075	1062	21.1088	1475	24.7356	988	17.391	718	11.5903	1157	24.1066	779	11.3413	542	10.1627	986	20.8604	565	7.74826	1	31319321	31389403	-	5833	LTN1
ENSBGRG00000000076	490	57.0957	336	33.0323	388	40.0376	452	42.7738	476	58.1406	507	43.2716	320	35.1747	248	30.7585	526	42.2873	1	31403553	31415114	-	995	RWDD2B
ENSBGRG00000000077	472	15.5243	679	18.8423	548	15.9618	434	11.5929	348	11.9982	268	6.45645	369	11.4491	421	14.7387	122	2.76852	1	31420296	31451387	+	3525	USP16
ENSBGRG00000000078	1151	80.8764	1186	70.3111	924	57.4973	825	47.0795	665	48.9816	900	46.3209	818	54.2217	1068	79.8775	695	33.6937	1	31453238	31466719	-	1650	-
ENSBGRG00000000079	21	2.44942	106	10.4314	71	7.33384	33	3.126	37	4.52388	56	4.78432	87	9.57275	26	3.22793	66	5.31135	1	31533753	31585600	+	994	MAP3K7CL
ENSBGRG00000000080	530	26.88	955	40.8649	272	12.2166	321	13.2218	188	9.99487	414	15.3795	531	25.4052	154	8.31346	422	14.7667	1	31783463	31799779	+	2286	BACH1
ENSBGRG00000000082	14	0.375034	0	0	0	0	0	0	0	0	0	0	0	0	0	0	0	0	1	32063270	32573255	-	4328	GRIK1
ENSBGRG00000000083	0	0	0	0	0	0	0	0	0	0	0	0	0	0	0	0	0	0	1	32879846	32880523	-	678	CLDN17
ENSBGRG00000000084	0	0	0	0	0	0	0	0	0	0	0	0	0	0	0	0	0	0	1	32941984	32942661	-	678	CLDN8
ENSBGRG00000000085	0	0	0	0	0	0	0	0	0	0	0	0	0	0	0	0	0	0	1	33035690	33036451	-	762	KRTAP24-1
ENSBGRG00000000086	0	0	0	0	0	0	0	0	0	0	0	0	0	0	0	0	0	0	1	33105981	33110933	-	2544	-
ENSBGRG00000000088	0	0	0	0	0	0	0	0	0	0	0	0	0	0	0	0	0	0	1	33189311	33189688	+	378	-
ENSBGRG00000000089	0	0	0	0	0	0	0	0	0	0	0	0	0	0	0	0	0	0	1	33239643	33240113	-	471	-
ENSBGRG00000000090	0	0	0	0	0	0	0	0	0	0	0	0	0	0	0	0	0	0	1	33244951	33245454	+	504	-
ENSBGRG00000000091	0	0	0	0	0	0	0	0	0	0	0	0	0	0	0	0	0	0	1	33254042	33254536	-	495	KAP13.1
ENSBGRG00000000092	0	0	0	0	0	0	0	0	0	0	0	0	0	0	0	0	0	0	1	33258339	33258749	+	411	KRTAP15-1
ENSBGRG00000000093	0	0	0	0	0	0	0	0	0	0	0	0	0	0	0	0	0	0	1	33274686	33277487	+	1875	-
ENSBGRG00000000094	0	0	0	0	0	0	0	0	0	0	0	0	0	0	0	0	0	0	1	33306218	33306379	-	162	-
ENSBGRG00000000096	0	0	0	0	0	0	0	0	0	0	0	0	0	0	0	0	0	0	1	33388013	33388234	-	222	KRTAP19-3
ENSBGRG00000000097	0	0	0	0	0	0	0	0	0	0	0	0	0	0	0	0	0	0	1	33396335	33396550	-	216	KRTAP19-5
ENSBGRG00000000099	0	0	0	0	0	0	0	0	0	0	0	0	0	0	0	0	0	0	1	33603449	33603703	+	255	-
ENSBGRG00000000100	0	0	0	0	0	0	0	0	0	0	0	0	0	0	0	0	0	0	1	33604678	33617704	+	255	-
ENSBGRG00000000101	0	0	0	0	0	0	0	0	0	0	0	0	0	0	0	0	0	0	1	33626758	33626985	+	228	-
ENSBGRG00000000103	0	0	0	0	0	0	0	0	0	0	0	0	0	0	0	0	0	0	1	33661105	33661380	-	276	-
ENSBGRG00000000105	0	0	0	0	0	0	0	0	0	0	0	0	0	0	0	0	0	0	1	33859697	33893116	+	297	-
ENSBGRG00000000106	0	0	0	0	0	0	0	0	0	0	0	0	0	0	0	0	0	0	1	33907433	33907705	-	273	-
ENSBGRG00000000107	0	0	0	0	0	0	0	0	0	0	0	0	0	0	0	0	0	0	1	33955917	33956189	+	273	-
ENSBGRG00000000108	0	0	0	0	0	0	0	0	0	0	0	0	0	0	0	0	0	0	1	34033540	34036328	-	689	-
ENSBGRG00000000109	0	0	0	0	0	0	0	0	0	0	0	0	0	0	0	0	0	0	1	34048947	34049135	-	189	KRTAP8-1
ENSBGRG00000000110	0	0	0	0	0	0	0	0	0	0	0	0	0	0	0	0	0	0	1	34075878	34076141	-	264	KRTAP7-1
ENSBGRG00000000111	0	0	0	0	0	0	0	0	0	0	0	0	0	0	0	0	0	0	1	34150728	34151207	-	480	KAP11.1
ENSBGRG00000000112	132	2.80087	292	5.22751	138	2.59315	160	2.75722	54	1.2011	104	1.61637	167	3.34279	18	0.406536	109	1.59575	1	34418102	34619862	-	5464	TIAM1
ENSBGRG00000000114	0	0	0	0	0	0	0	0	0	0	0	0	0	0	0	0	0	0	1	34895772	34897490	+	1719	-
ENSBGRG00000000116	0	0	0	0	0	0	0	0	0	0	0	0	1	0.0841966	0	0	0	0	1	35084555	35085853	+	1299	-
ENSBGRG00000000117	875	120.483	1565	181.813	1676	204.372	1018	113.841	1150	165.99	1716	173.071	957	124.309	636	93.2142	1784	169.485	1	35088954	35098559	+	842	SOD1
ENSBGRG00000000118	711	21.0073	511	12.7384	727	19.0224	613	14.7094	658	20.3794	349	7.55292	688	19.1762	556	17.4857	512	10.4373	1	35101017	35167132	-	3924	SCAF4
ENSBGRG00000000119	40	2.17115	0	0	3	0.144205	3	0.132246	0	0	0	0	70	3.58427	0	0	29	1.08604	1	35325715	35471104	+	2136	HUNK
ENSBGRG00000000120	0	0	0	0	0	0	0	0	0	0	0	0	0	0	0	0	0	0	1	35781819	35801191	-	935	MIS18A
ENSBGRG00000000121	0	0	0	0	0	0	0	0	0	0	0	0	0	0	0	0	0	0	1	35817746	35833047	+	743	-
ENSBGRG00000000122	232	3.33762	158	1.91778	82	1.0447	216	2.52368	117	1.76441	277	2.91888	186	2.52427	107	1.63847	304	3.01745	1	35836490	35927256	-	8059	URB1
ENSBGRG00000000123	24	1.33712	15	0.705086	57	2.8123	0	0	23	1.34323	26	1.06101	19	0.998586	13	0.770918	13	0.499711	1	35951653	36100084	+	2081	EVA1C
ENSBGRG00000000124	116	11.1332	176	14.2518	139	11.8143	144	11.2243	127	12.7771	231	16.2392	155	14.0336	98	10.0114	186	12.3167	1	36123216	36135674	-	1208	CFAP298
ENSBGRG00000000125	549	12.4585	584	11.1815	455	9.14397	462	8.51468	392	9.32493	493	8.19463	429	9.18386	477	11.5218	762	11.9307	1	36144896	36247042	-	5109	SYNJ1
ENSBGRG00000000127	641	26.0579	1039	35.636	729	26.2444	495	16.3425	690	29.4032	693	20.6349	520	19.9415	570	24.6639	138	3.87059	1	36258968	36290598	-	2852	PAXBP1
ENSBGRG00000000128	0	0	0	0	0	0	0	0	10	1.84982	0	0	0	0	0	0	0	0	1	36309380	36310036	-	657	C21orf62
ENSBGRG00000000129	0	0	0	0	0	0	0	0	0	0	0	0	0	0	0	0	0	0	1	36609664	36610464	+	801	OLIG1
ENSBGRG00000000130	0	0	0	0	0	0	0	0	0	0	0	0	0	0	0	0	0	0	1	36719927	36720124	+	198	-
ENSBGRG00000000131	151	5.73054	78	2.49751	167	5.61261	87	2.68145	59	2.34712	164	4.5588	183	6.55154	120	4.84738	56	1.46631	1	36786295	36826818	+	3055	IFNAR2
ENSBGRG00000000132	173	15.3345	54	4.0384	61	4.7883	33	2.37557	13	1.2079	97	6.29771	25	2.09043	108	10.1895	99	6.05446	1	36829072	36863430	+	1308	IL10RB
ENSBGRG00000000133	158	9.99912	248	13.2419	173	9.69572	92	4.72851	96	6.36856	132	6.11881	232	13.8505	189	12.7313	101	4.41005	1	36937136	36967325	+	1832	IFNAR1
ENSBGRG00000000134	1048	74.2691	1173	70.1355	782	49.0775	1106	63.6552	743	55.1951	934	48.4822	822	54.9531	334	25.1942	1140	55.7403	1	37032802	37065571	+	1636	IFNGR2
ENSBGRG00000000136	151	12.9584	331	23.966	172	13.0717	105	7.31806	185	16.6422	160	10.0573	235	19.0246	117	10.6873	215	12.7301	1	37084133	37101794	-	1351	TMEM50B
ENSBGRG00000000137	376	38.1392	493	42.1914	590	52.9987	293	24.137	369	39.2352	286	21.249	484	46.313	696	75.145	173	12.1073	1	37145166	37146308	-	1143	DNAJC28
ENSBGRG00000000138	603	19.5283	809	22.1049	492	14.1105	769	20.2258	390	13.2397	737	17.4825	561	17.1389	556	19.1659	655	14.6354	1	37168340	37196025	-	3580	GART
ENSBGRG00000000139	7642	103.361	6965	79.4808	5880	70.4295	5815	63.8748	4968	70.436	6731	66.6831	5650	72.0892	5138	73.9689	7658	71.4629	1	37196599	37230367	+	8572	SON
ENSBGRG00000000141	85	2.75044	144	3.93132	135	3.86853	143	3.75795	175	5.9359	60	1.42208	198	6.04397	210	7.23285	54	1.20558	1	37231178	37242874	-	3583	DONSON
ENSBGRG00000000142	199	10.277	144	6.27436	273	12.4855	180	7.5495	221	11.9639	212	8.01933	215	10.4743	154	8.46528	186	6.62742	1	37242775	37279040	-	2245	CRYZL1
ENSBGRG00000000143	845	15.433	1149	17.7054	1187	19.1988	952	14.1209	779	14.9141	651	8.70888	1198	20.6407	615	11.9557	655	8.25376	1	37362083	37551824	+	6348	ITSN1
ENSBGRG00000000144	685	100.402	882	109.072	1030	133.696	582	69.2801	484	74.3642	823	88.3572	528	73.0065	689	107.493	761	76.9584	1	37566981	37578576	-	791	ATP5PO
ENSBGRG00000000146	539	166.643	290	75.6467	333	91.1743	433	108.722	109	35.3257	1610	364.597	454	132.412	65	21.3904	586	125.001	1	37787538	37858026	+	375	MRPS6
ENSBGRG00000000147	0	0	0	0	0	0	0	0	0	0	0	0	0	0	0	0	0	0	1	38173812	38174183	+	372	-
ENSBGRG00000000148	0	0	0	0	0	0	0	0	0	0	0	0	0	0	0	0	0	0	1	38174623	38175090	+	468	-
ENSBGRG00000000149	20	13.1005	20	11.053	0	0	0	0	1	0.686629	101	48.4581	54	33.3675	38	26.494	37	16.7215	1	38188990	38195603	+	177	SMIM11
ENSBGRG00000000150	0	0	0	0	0	0	0	0	0	0	0	0	0	0	0	0	0	0	1	38202263	38203018	+	756	C21orf140
ENSBGRG00000000151	0	0	0	0	0	0	0	0	0	0	0	0	0	0	0	0	0	0	1	38225837	38232403	-	1599	SMIM34
ENSBGRG00000000152	0	0	0	0	0	0	0	0	0	0	0	0	0	0	0	0	0	0	1	38245450	38245785	-	336	-
ENSBGRG00000000153	0	0	0	0	0	0	0	0	0	0	0	0	0	0	0	0	0	0	1	38262094	38262486	-	393	KCNE1
ENSBGRG00000000154	94	5.95209	99	5.28896	79	4.42994	183	9.41076	127	8.42967	463	21.4739	63	3.76319	164	11.0533	304	13.2811	1	38314924	38451005	-	1831	RCAN1
ENSBGRG00000000156	0	0	0	0	0	0	0	0	0	0	0	0	0	0	0	0	0	0	1	59975650	59976858	-	1209	-
ENSBGRG00000000157	0	0	0	0	0	0	0	0	0	0	0	0	0	0	0	0	0	0	1	38428839	38429384	+	546	-
ENSBGRG00000000158	10	0.348166	0	0	9	0.277497	0	0	0	0	0	0	0	0	0	0	0	0	1	38519608	38580809	+	3330	-
ENSBGRG00000000161	0	0	0	0	0	0	0	0	0	0	0	0	0	0	0	0	0	0	1	38671499	38672599	+	1101	HTR1F
ENSBGRG00000000164	770	102.968	871	98.2703	522	61.8174	753	81.7783	476	66.7242	706	69.1519	702	88.5568	501	71.3109	653	60.2479	1	38729830	38825987	-	867	CGGBP1
ENSBGRG00000000165	0	0	0	0	0	0	0	0	0	0	0	0	0	0	0	0	0	0	1	90215857	90217665	+	1809	-
ENSBGRG00000000166	576	17.1058	644	16.1361	646	16.9896	409	9.86451	435	13.5417	368	8.00491	530	14.8481	406	12.8337	224	4.58972	1	38733020	38826550	+	3904	ZNF654
ENSBGRG00000000167	0	0	0	0	0	0	0	0	0	0	0	0	0	0	0	0	0	0	1	157822283	157828748	+	621	-
ENSBGRG00000000168	150	6.77479	108	4.11548	342	13.6792	239	8.76666	235	11.126	103	3.40745	212	9.03262	51	2.45178	58	1.80738	1	60403758	60611665	+	2567	NECTIN3
ENSBGRG00000000169	0	0	0	0	0	0	0	0	0	0	0	0	0	0	0	0	0	0	1	133295717	133297789	-	2073	-
ENSBGRG00000000170	0	0	0	0	0	0	0	0	0	0	0	0	0	0	0	0	0	0	2	32424491	32425768	-	1278	-
ENSBGRG00000000172	0	0	0	0	0	0	11	0.567223	0	0	0	0	0	0	0	0	36	1.57706	2	4744710	4768797	+	1826	-
ENSBGRG00000000173	2740	116.492	2359	84.6186	2156	81.1751	2955	102.032	2118	94.3922	2877	89.5928	1967	78.8902	1376	62.2688	4224	123.904	1	90221538	90230690	-	2727	PSMD2
ENSBGRG00000000174	0	0	0	0	0	0	0	0	0	0	0	0	0	0	0	0	0	0	1	168027668	168051852	-	2656	-
ENSBGRG00000000176	0	0	0	0	0	0	0	0	0	0	0	0	0	0	0	0	0	0	1	157822451	157822858	+	288	-
ENSBGRG00000000177	543	38.7177	380	22.8605	270	17.0491	341	19.7468	233	17.4153	551	28.7773	310	20.8519	305	23.1482	401	19.7275	2	32451989	32456310	-	1626	RETREG2
ENSBGRG00000000178	232	7.90185	294	8.44852	149	4.49424	118	3.26403	95	3.39179	74	1.84612	49	1.57438	130	4.71293	62	1.45697	1	38835858	38850353	+	3404	C3orf38
ENSBGRG00000000179	0	0	8	0.743164	0	0	0	0	0	0	0	0	2	0.207733	0	0	0	0	2	4774770	4775822	+	1053	-
ENSBGRG00000000180	42	2.36152	55	2.60914	105	5.22829	167	7.62588	59	3.47743	76	3.12999	77	4.08419	12	0.718174	24	0.931044	1	135939807	135960567	-	2062	DIPK2A
ENSBGRG00000000181	158	14.8568	82	6.5054	66	5.49592	200	15.2732	42	4.13982	275	18.9403	114	10.1122	89	8.90767	164	10.6397	1	157881015	157909429	-	1233	UBE2G2
ENSBGRG00000000182	0	0	0	0	0	0	0	0	0	0	0	0	0	0	0	0	0	0	1	39205184	39206002	+	819	-
ENSBGRG00000000183	0	0	0	0	0	0	0	0	0	0	0	0	0	0	0	0	0	0	1	80316223	80446699	+	4698	ATP13A4
ENSBGRG00000000185	3689	76.3749	5271	92.0721	3049	55.9022	6162	103.609	2669	57.9236	8738	132.508	5502	107.457	2331	51.3678	10014	143.043	2	4785163	4907008	+	5600	PINK1
ENSBGRG00000000186	140	40.0777	49	11.8349	58	14.7039	158	36.7337	53	15.9044	241	50.5336	176	47.5293	69	21.0248	278	54.9082	1	157913278	157921554	-	405	-
ENSBGRG00000000190	0	0	0	0	9	2.29867	0	0	0	0	0	0	0	0	0	0	0	0	3	8099287	8099688	+	402	NHLH1
ENSBGRG00000000191	301	12.0047	158	5.31661	173	6.11027	512	16.5839	157	6.56372	481	14.0514	139	5.22966	148	6.28281	790	21.7385	2	32456719	32463188	+	2907	CNPPD1
ENSBGRG00000000192	0	0	0	0	0	0	0	0	0	0	0	0	0	0	0	0	0	0	2	54096256	54097548	+	1293	-
ENSBGRG00000000193	41	4.11203	77	6.51562	33	2.931	156	12.7066	24	2.52318	167	12.2681	51	4.82521	37	3.94985	186	12.8707	1	157943131	157962527	-	1156	PTTG1IP
ENSBGRG00000000195	39	2.3587	72	3.67395	139	7.44478	101	4.96091	105	6.65675	89	3.94263	120	6.84641	110	7.08121	113	4.71524	1	136130456	136869878	+	1917	SLC9A9
ENSBGRG00000000197	20	0.415181	81	1.41868	71	1.30525	99	1.66907	61	1.3274	22	0.334517	46	0.900821	21	0.464016	1	0.0143227	1	39875237	40333962	+	5585	EPHA3
ENSBGRG00000000198	0	0	22	0.798522	22	0.838153	0	0	0	0	9	0.283597	0	0	0	0	0	0	1	60852787	60961654	+	2695	CD96
ENSBGRG00000000199	0	0	1	0.0827572	0	0	0	0	0	0	0	0	0	0	0	0	0	0	2	78219281	78220462	-	1182	-
ENSBGRG00000000200	0	0	0	0	0	0	0	0	0	0	0	0	0	0	0	0	0	0	2	143214962	143216074	-	1113	-
ENSBGRG00000000201	0	0	0	0	0	0	0	0	0	0	0	0	0	0	2	0.166204	0	0	3	53045362	53046846	+	1485	-
ENSBGRG00000000202	484	49.0941	652	55.7987	697	62.6103	355	29.2445	515	54.7591	332	24.6667	344	32.9167	512	55.2791	174	12.1773	2	128608250	128613411	+	1143	HNRNPA3
ENSBGRG00000000203	463	22.7072	435	17.9997	533	23.1494	743	29.594	445	22.8775	1017	36.5335	373	17.257	304	15.8695	821	27.7807	2	4809446	4826041	-	2364	DDOST
ENSBGRG00000000205	151	12.6953	38	2.69552	134	9.977	119	8.1254	199	17.5382	15	0.923731	146	11.5796	168	15.0343	192	11.1374	2	143288922	143294171	-	1379	MSTN
ENSBGRG00000000206	1	0.0669781	27	1.52577	0	0	0	0	0	0	0	0	1	0.0631839	0	0	0	0	1	136380296	136382026	-	1731	-
ENSBGRG00000000207	0	0	0	0	0	0	0	0	0	0	0	0	0	0	0	0	0	0	1	60892837	60893493	-	657	ZBED2
ENSBGRG00000000208	50	2.10187	107	3.79501	69	2.5687	71	2.42396	22	0.969446	60	1.84746	133	5.27426	43	1.92403	276	8.00502	1	157991075	158009641	-	2758	ITGB2
ENSBGRG00000000209	0	0	0	0	0	0	0	0	0	0	0	0	2	0.0779276	0	0	27	0.76943	3	8158875	8170326	+	2807	VANGL2
ENSBGRG00000000210	776	25.0609	1202	32.7516	746	21.3355	874	22.9234	691	23.3926	613	14.5005	822	25.0427	747	25.6781	548	12.2105	2	54989848	55372707	-	3590	PLCL1
ENSBGRG00000000211	6	0.285564	10	0.401556	0	0	15	0.579797	7	0.349234	0	0	15	0.673469	0	0	14	0.459725	1	90239932	90255241	-	2436	ECE2
ENSBGRG00000000212	0	0	0	0	1	0.0639712	0	0	0	0	0	0	0	0	31	2.38355	0	0	1	136724925	136726529	-	1605	-
ENSBGRG00000000213	1900	76.0126	1707	57.618	1908	67.5988	1319	42.8557	1316	55.189	1179	34.5489	1721	64.9511	1649	70.2198	745	20.5639	2	128624477	128664345	-	2898	NFE2L2
ENSBGRG00000000214	0	0	1	0.0608327	0	0	0	0	0	0	0	0	0	0	0	0	0	0	1	60973229	60974836	-	1608	-
ENSBGRG00000000215	1410	33.6367	2475	49.8152	2277	48.1045	2070	40.1048	2141	53.5397	1744	30.4739	1397	31.4387	1860	47.2295	4402	72.4539	1	168298568	168542235	+	4860	PLCL2
ENSBGRG00000000217	0	0	0	0	0	0	0	0	0	0	0	0	0	0	0	0	0	0	2	143419990	143420172	+	183	-
ENSBGRG00000000218	0	0	20	1.23978	0	0	45	2.68514	0	0	22	1.18395	0	0	15	1.17306	79	4.00468	1	137060027	137062776	-	1578	CHST2
ENSBGRG00000000219	0	0	0	0	15	1.18744	0	0	0	0	0	0	0	0	0	0	0	0	3	8185401	8186749	-	1297	-
ENSBGRG00000000220	353	26.8723	100	6.42278	90	6.06739	505	31.2215	173	13.8052	692	38.5855	374	26.8581	449	36.3817	360	18.9082	3	20744910	20752085	+	1523	CA14
ENSBGRG00000000221	104	3.35122	283	7.69393	82	2.33998	67	1.75338	42	1.41868	52	1.22733	39	1.18552	71	2.4352	55	1.22278	3	53286112	53308452	+	3598	F3
ENSBGRG00000000223	1258	43.3695	1567	45.579	1270	38.7736	1229	34.4102	1093	39.4992	1042	26.3123	966	31.4162	1495	54.8594	510	12.1308	1	137136621	137191891	-	3363	U2SURP
ENSBGRG00000000225	342	19.6293	494	23.9221	645	32.7844	356	16.5944	351	21.1179	314	13.2007	578	31.2954	134	8.18635	299	11.8404	2	78284753	78327670	+	2020	SLC35F5
ENSBGRG00000000226	159	11.0187	105	6.13927	72	4.41871	97	5.45931	78	5.66623	49	2.48724	261	17.0627	151	11.1383	19	0.908459	3	8267785	8289379	-	1673	SLAMF6
ENSBGRG00000000227	0	0	0	0	0	0	0	0	0	0	0	0	0	0	0	0	0	0	1	168460971	168461972	-	1002	-
ENSBGRG00000000228	0	0	0	0	0	0	0	0	15	0.410401	21	0.401476	0	0	0	0	0	0	2	4828371	4895857	-	4442	KIF17
ENSBGRG00000000229	0	0	0	0	0	0	0	0	0	0	7	0.524208	0	0	0	0	0	0	1	137248013	137249146	+	1134	PAQR9
ENSBGRG00000000230	0	0	0	0	0	0	0	0	16	3.60099	0	0	0	0	28	6.39884	0	0	3	115487394	115489878	-	540	TMCO2
ENSBGRG00000000231	120	52.6996	58	21.4905	73	28.3908	149	53.1428	92	42.3525	294	94.5718	34	14.0857	219	102.371	161	48.7831	1	168538166	168538429	-	264	-
ENSBGRG00000000232	0	0	0	0	0	0	0	0	0	0	0	0	0	0	0	0	0	0	3	95053700	95054794	-	1095	-
ENSBGRG00000000234	0	0	0	0	0	0	0	0	0	0	0	0	0	0	0	0	0	0	5	3300249	3302386	-	939	-
ENSBGRG00000000235	0	0	0	0	0	0	0	0	0	0	0	0	0	0	0	0	0	0	3	62951323	62953801	+	1404	-
ENSBGRG00000000236	1412	22.7559	1511	20.5455	1032	14.7288	711	9.30596	969	16.37	702	8.28677	824	12.5274	783	13.4316	494	5.49293	3	115498218	115590344	-	7194	RLF
ENSBGRG00000000237	831	29.8838	1167	35.4078	1005	32.0059	779	22.7512	805	30.3456	816	21.4938	706	23.9504	699	26.7559	586	14.5395	2	128832299	128974404	+	3224	AGPS
ENSBGRG00000000238	0	0	0	0	0	0	0	0	1	0.361706	0	0	0	0	0	0	0	0	4	17051583	17052835	+	336	-
ENSBGRG00000000240	0	0	0	0	0	0	0	0	0	0	0	0	0	0	0	0	0	0	1	90265770	90266906	+	240	CAMK2N2
ENSBGRG00000000241	0	0	0	0	0	0	12	1.26388	22	2.99075	0	0	0	0	0	0	0	0	2	78481195	78482673	+	894	GPR39
ENSBGRG00000000242	7	0.201333	0	0	0	0	7	0.163511	0	0	0	0	0	0	0	0	0	0	3	131053432	131098627	-	4031	-
ENSBGRG00000000243	0	0	0	0	0	0	0	0	0	0	19	0.811217	0	0	0	0	0	0	2	4899552	4912924	-	1989	SH2D5
ENSBGRG00000000244	15	0.191846	59	0.63666	40	0.453056	31	0.322	7	0.0938481	0	0	13	0.156848	0	0	10	0.0882429	3	104821953	106436105	+	9065	BEND5
ENSBGRG00000000245	420	22.4192	794	35.7589	736	34.7918	644	27.9182	492	27.5296	449	17.5552	607	30.5656	413	23.4654	492	18.1198	3	53321124	53409312	-	2172	ABCD3
ENSBGRG00000000246	69	24.9215	58	17.6745	195	62.3719	157	46.0529	117	44.2972	137	36.2438	20	6.81442	95	36.5221	120	29.9036	4	17052961	17057013	+	321	MRPS33
ENSBGRG00000000248	0	0	32	4.07579	33	4.41176	0	0	16	2.53194	37	4.09128	0	0	0	0	164	17.0817	1	90268456	90274506	-	768	EEF1AKMT4
ENSBGRG00000000249	158	11.965	72	4.60024	164	10.9984	199	12.2388	79	6.27115	307	17.0287	208	14.8591	69	5.56174	357	18.6527	3	20753544	20757164	-	1531	APH1A
ENSBGRG00000000250	0	0	0	0	0	0	0	0	0	0	0	0	0	0	0	0	0	0	1	80472638	80606816	+	4153	ATP13A5
ENSBGRG00000000252	63	3.71713	118	5.87412	182	9.50973	50	2.3959	89	5.50456	34	1.46938	124	6.90181	187	11.744	7	0.28496	3	8325462	8379941	-	1965	CD84
ENSBGRG00000000253	115	8.38027	242	14.8788	289	18.6503	95	5.62232	228	17.4165	162	8.64695	148	10.1741	67	5.19687	126	6.33502	3	95058460	95124688	+	1591	OMA1
ENSBGRG00000000254	96	7.86584	326	22.5364	213	15.4555	240	15.9704	216	18.5521	211	12.6632	277	21.4105	226	19.7101	234	13.2284	1	137349323	137452455	+	1415	PCOLCE2
ENSBGRG00000000255	707	15.5156	636	11.776	506	9.83398	680	12.1197	560	12.8826	1130	18.1642	533	11.0344	740	17.2857	876	13.2639	1	60988247	61311797	+	5283	PHLDB2
ENSBGRG00000000256	7	0.406804	0	0	42	2.16155	0	0	0	0	11	0.46824	0	0	0	0	0	0	2	128994411	128997579	-	1995	-
ENSBGRG00000000257	3	0.526996	0	0	0	0	17	2.42531	9	1.65727	154	19.815	0	0	28	5.23542	165	19.9981	1	158043026	158068512	+	660	SLX9
ENSBGRG00000000258	29	2.39646	22	1.53387	26	1.90272	31	2.08049	19	1.64585	27	1.63427	0	0	37	3.25448	61	3.47792	1	90275315	90281817	+	1403	ALG3
ENSBGRG00000000259	138	10.5122	135	8.67645	170	11.4682	167	10.3315	73	5.82913	195	10.8802	216	15.5218	23	1.86488	413	21.7062	3	131100631	131102402	+	1522	DUSP28
ENSBGRG00000000260	4	0.18447	11	0.428007	0	0	11	0.411993	0	0	0	0	26	1.13113	0	0	63	2.00458	2	78784587	78854886	-	2514	LYPD1
ENSBGRG00000000262	125	6.40406	49	2.11804	82	3.72039	157	6.53247	130	6.98159	140	5.25366	134	6.47626	127	6.92558	95	3.35805	2	55398420	55500070	+	2263	BOLL
ENSBGRG00000000263	90	5.43465	102	5.19663	108	5.7754	74	3.62905	40	2.53194	61	2.69803	17	0.968393	36	2.31387	46	1.91648	3	63046002	63110673	+	1920	ZNHIT6
ENSBGRG00000000264	0	0	0	0	0	0	0	0	0	0	0	0	0	0	0	0	0	0	2	129069752	129070981	+	1230	-
ENSBGRG00000000265	111	6.84899	25	1.30148	100	5.46427	67	3.35745	19	1.22892	17	0.768317	117	6.81025	84	5.51683	57	2.42659	4	95664567	95708279	-	1879	CCDC126
ENSBGRG00000000266	49	1.38426	171	4.07579	107	2.67692	236	5.4146	81	2.39868	92	1.9037	54	1.4391	95	2.85663	79	1.53981	1	41036548	41144118	-	4104	PROS1
ENSBGRG00000000267	145	10.2072	20	1.18784	68	4.23911	62	3.54454	127	9.37142	110	5.67175	93	6.1758	33	2.47262	34	1.65133	3	115639755	115657119	+	1647	-
ENSBGRG00000000268	7	0.729177	0	0	1	0.0922495	0	0	16	1.74711	0	0	0	0	0	0	47	3.37793	3	131108199	131109311	+	1113	-
ENSBGRG00000000269	0	0	0	0	0	0	0	0	0	0	0	0	0	0	0	0	0	0	2	78784678	78785154	+	477	-
ENSBGRG00000000270	82	5.22076	61	3.27675	81	4.56704	60	3.10244	11	0.734139	141	6.57548	102	6.12624	45	3.04958	176	7.73126	2	129080416	129082410	-	1821	-
ENSBGRG00000000271	118	6.34252	55	2.49422	193	9.18685	93	4.05971	64	3.606	179	7.04728	237	12.0172	155	8.86786	169	6.26735	2	143461604	143628609	-	2157	HIBCH
ENSBGRG00000000272	0	0	29	7.27372	0	0	0	0	0	0	0	0	4	1.12176	0	0	0	0	3	20758993	20766289	+	390	C1orf54
ENSBGRG00000000274	19	2.00989	20	1.78502	0	0	0	0	10	1.10888	0	0	14	1.39708	0	0	0	0	3	8452762	8494285	-	1096	SLAMF1
ENSBGRG00000000275	19	0.548108	130	3.16409	77	1.96713	69	1.61656	54	1.63294	83	1.75379	78	2.12266	0	0	76	1.51267	2	32465134	32579212	+	4019	-
ENSBGRG00000000276	407	26.6896	597	33.0305	621	36.0636	430	22.9007	366	25.159	250	12.0082	244	15.0942	564	39.3671	450	20.36	4	64342546	64386941	-	1768	HERPUD2
ENSBGRG00000000277	751	53.8468	590	35.6915	349	22.1603	1122	65.3349	351	26.3811	1766	92.7468	979	66.2181	276	21.0638	3716	183.829	3	131112412	131117933	+	1617	RNPEPL1
ENSBGRG00000000280	388	11.7453	189	4.8271	121	3.24374	316	7.76874	80	2.53855	307	6.80703	222	6.33954	126	4.05984	657	13.7219	1	158237377	158319534	+	3830	ADARB1
ENSBGRG00000000281	0	0	0	0	0	0	0	0	0	0	0	0	0	0	0	0	0	0	5	75353159	75353968	-	810	-
ENSBGRG00000000282	83	3.41967	55	1.91188	106	3.8676	83	2.77726	64	2.76408	106	3.1989	92	3.57575	23	1.00865	28	0.795942	4	52306575	52566099	-	2814	ADAM22
ENSBGRG00000000283	1237	61.0804	1273	53.0339	888	38.8306	1075	43.1094	788	40.7872	869	31.4297	667	31.0693	723	37.9994	691	23.5411	2	4920477	4954729	-	2348	HP1BP3
ENSBGRG00000000284	64	4.44318	105	6.15029	30	1.84444	72	4.05955	28	2.03768	85	4.32236	134	8.77591	207	15.2965	92	4.40676	5	3675640	3996679	+	1670	ETV6
ENSBGRG00000000285	202	3.8255	86	1.37413	71	1.19076	69	1.06125	90	1.78667	29	0.402275	45	0.803939	55	1.10868	72	0.940777	3	20768495	20779899	+	6122	CIART
ENSBGRG00000000286	152	7.389	186	7.62865	105	4.52023	93	3.67161	42	2.14021	136	4.84249	172	7.88758	46	2.38016	68	2.2807	1	137481771	137550461	-	2385	TRPC1
ENSBGRG00000000287	0	0	0	0	0	0	0	0	0	0	0	0	0	0	0	0	0	0	3	53381912	53383156	+	1245	-
ENSBGRG00000000288	8	0.167785	0	0	0	0	11	0.187364	0	0	0	0	9	0.178065	0	0	12	0.173644	2	129091433	129558558	-	5528	PDE11A
ENSBGRG00000000289	0	0	0	0	0	0	0	0	0	0	0	0	0	0	0	0	0	0	5	82187938	82200976	-	534	GTSF1
ENSBGRG00000000290	73	4.36041	186	9.37369	79	4.17889	109	5.28765	90	5.63524	37	1.61881	90	5.07132	63	4.00546	139	5.72845	5	38923315	39004706	+	1941	IGF1
ENSBGRG00000000291	0	0	0	0	0	0	0	0	0	0	0	0	0	0	0	0	0	0	5	124543291	124557260	+	1809	UPK3A
ENSBGRG00000000293	0	0	0	0	0	0	0	0	0	0	0	0	0	0	0	0	12	0.509505	3	37260018	37357758	-	1884	-
ENSBGRG00000000294	5	0.192079	9	0.291707	9	0.306184	12	0.37439	0	0	0	0	39	1.41335	0	0	0	0	3	96366374	96883896	+	3018	DAB1
ENSBGRG00000000295	0	0	0	0	1	0.23282	4	0.85405	1	0.275586	0	0	1	0.248008	0	0	0	0	3	53430750	53431486	-	441	-
ENSBGRG00000000297	87	5.11756	47	2.33257	97	5.05294	113	5.39826	47	2.89805	120	5.17027	179	9.93277	123	7.70115	102	4.13963	5	116036499	116085358	-	1971	DCP1B
ENSBGRG00000000298	32	2.52556	34	2.26402	24	1.67745	6	0.384584	0	0	0	0	0	0	0	0	10	0.544535	5	110670343	110687084	-	1469	CD4
ENSBGRG00000000299	1060	101.149	1219	98.141	966	81.6319	841	65.1751	868	86.8238	893	62.4157	917	82.5462	741	75.2626	666	43.8476	4	95800566	95819543	+	1215	TRA2A
ENSBGRG00000000300	78	6.86656	95	7.05604	113	8.80951	156	11.1532	52	4.79858	134	8.64047	76	6.31149	157	14.7113	174	10.5684	5	75436216	75443218	-	1317	ZNF641
ENSBGRG00000000301	688	24.2893	617	18.3783	628	19.6343	590	16.9165	366	13.5448	625	16.162	368	12.256	683	25.6658	379	9.23174	4	17132793	17317121	+	3284	BRAF
ENSBGRG00000000303	0	0	0	0	0	0	9	0.838211	1	0.120211	0	0	32	3.46181	0	0	0	0	6	95762027	95827175	-	1011	HPGDS
ENSBGRG00000000304	530	97.0739	685	105.855	455	73.8018	412	61.2852	338	64.8946	297	39.8447	522	90.1925	381	74.2777	199	25.1476	5	47319134	47371925	-	633	-
ENSBGRG00000000305	26	0.351946	92	1.05071	51	0.611367	58	0.637621	17	0.241222	0	0	46	0.5874	30	0.432246	10	0.0933943	2	78858680	80001340	-	8565	NCKAP5
ENSBGRG00000000306	397	13.5019	372	10.6743	433	13.0413	382	10.5511	330	11.7647	350	8.71885	371	11.9028	304	11.0048	270	6.33555	5	15221365	15321004	-	3409	C2CD5
ENSBGRG00000000307	628	99.0609	895	119.113	570	79.6245	1075	137.716	616	101.856	792	91.5074	745	110.859	364	61.1155	1354	147.36	7	73250565	73280055	+	735	KLF9
ENSBGRG00000000308	60	9.6616	189	25.6775	114	16.2567	17	2.2232	23	3.88231	0	0	88	13.3676	217	37.1933	0	0	3	8534791	8556552	-	720	CD48
ENSBGRG00000000309	0	0	30	1.48887	0	0	0	0	0	0	0	0	0	0	0	0	21	0.852276	5	79451385	79453789	-	1971	FIGNL2
ENSBGRG00000000310	0	0	14	0.352319	0	0	0	0	0	0	0	0	0	0	0	0	0	0	1	90282171	90294678	-	3887	VWA5B2
ENSBGRG00000000313	190	15.1398	741	49.8171	513	36.2004	927	59.99	382	31.9077	1520	88.7154	780	58.6321	1359	115.264	1874	103.028	3	63169237	63171285	-	1455	CCN1
ENSBGRG00000000314	149	4.02398	317	7.22306	169	4.0419	139	3.04871	96	2.71773	121	2.39355	104	2.64958	47	1.35106	156	2.90677	5	82223530	82271051	+	4293	NCKAP1L
ENSBGRG00000000315	6	0.296773	1	0.0417316	14	0.613239	47	1.888	0	0	88	3.18818	28	1.30648	18	0.947659	122	4.16342	3	131127391	131141166	+	2344	CAPN10
ENSBGRG00000000316	0	0	0	0	0	0	0	0	0	0	17	1.35556	43	4.41593	0	0	0	0	5	79526369	79529581	+	1065	-
ENSBGRG00000000317	0	0	3	0.194085	0	0	0	0	7	0.562654	0	0	0	0	0	0	0	0	2	129117566	129119077	+	1512	-
ENSBGRG00000000318	50	1.5108	17	0.433391	26	0.69573	62	1.52146	26	0.823525	22	0.486911	16	0.456071	57	1.83324	96	2.00137	5	116139132	116556606	+	3837	-
ENSBGRG00000000319	0	0	0	0	1	0.0649423	0	0	0	0	0	0	0	0	0	0	0	0	2	129582868	129584448	+	1581	-
ENSBGRG00000000320	61	6.47646	118	10.5702	249	23.4119	63	5.43225	187	20.812	86	6.68797	163	16.3256	90	10.1708	46	3.36964	4	64545152	64576604	+	1092	-
ENSBGRG00000000321	666	17.8781	874	19.7948	1161	27.6	682	14.8684	840	23.6369	837	16.4574	514	13.0162	816	23.3155	478	8.85304	3	53573498	53665158	+	4319	ARHGAP29
ENSBGRG00000000322	83	36.4506	105	38.9053	121	47.0588	133	47.4362	102	46.9561	220	70.768	61	25.2714	161	75.2591	74	22.4221	3	20784203	20798372	+	264	MRPS21
ENSBGRG00000000324	9	1.28188	23	2.76393	27	3.40564	36	4.16428	11	1.64234	61	6.36391	10	1.34363	0	0	86	8.45127	5	47373411	47375237	+	814	ORMDL2
ENSBGRG00000000325	0	0	0	0	0	0	0	0	0	0	0	0	0	0	0	0	0	0	5	75669867	75670935	-	873	-
ENSBGRG00000000326	179	9.44182	216	9.61278	164	7.66082	182	7.79661	48	2.65405	302	11.668	123	6.12042	62	3.48098	554	20.1618	1	158363670	158379487	-	2198	POFUT2
ENSBGRG00000000328	0	0	0	0	0	0	0	0	0	0	0	0	0	0	0	0	0	0	2	129585823	129601220	-	318	-
ENSBGRG00000000329	0	0	0	0	0	0	0	0	0	0	0	0	0	0	0	0	0	0	3	105680230	105680649	-	420	-
ENSBGRG00000000330	0	0	0	0	15	0.992976	0	0	0	0	0	0	0	0	0	0	0	0	5	110706859	110713004	-	1551	LAG 3
ENSBGRG00000000331	633	40.0379	511	27.2698	735	41.1703	505	25.9413	485	32.1569	426	19.7363	567	33.8317	562	37.8365	557	24.3075	1	80549841	80628588	-	1833	PLAAT1
ENSBGRG00000000335	7	0.300583	12	0.434751	7	0.266191	0	0	0	0	0	0	0	0	16	0.731296	0	0	5	4210386	4242389	+	2700	BCL2L14
ENSBGRG00000000336	131	8.74887	232	13.0726	122	7.21555	208	11.2817	18	1.26014	268	13.11	242	15.2465	176	12.5112	683	31.4716	5	79551574	79564645	+	1736	ACVRL1
ENSBGRG00000000337	0	0	0	0	8	3.91138	8	3.58701	0	0	0	0	0	0	28	16.4542	0	0	3	63173394	63173603	+	210	-
ENSBGRG00000000338	0	0	0	0	0	0	0	0	0	0	0	0	0	0	0	0	0	0	4	64551526	64552746	-	1221	-
ENSBGRG00000000339	636	41.7539	397	21.9899	498	28.9533	636	33.9101	442	30.4177	475	22.8413	508	31.4613	453	31.6552	582	26.3621	3	115660643	115673956	-	1766	-
ENSBGRG00000000340	0	0	0	0	0	0	0	0	0	0	0	0	0	0	0	0	0	0	5	75801579	75802496	-	918	-
ENSBGRG00000000341	164	7.31872	252	9.48821	228	9.01063	115	4.16793	222	10.3851	184	6.01447	95	3.99934	132	6.27006	206	6.34272	2	129611090	129630617	+	2598	RBM45
ENSBGRG00000000342	284	15.2721	272	12.3408	241	11.477	441	19.2598	160	9.01917	488	19.2216	487	24.705	201	11.5049	464	17.2154	5	47376199	47381715	-	2156	DNAJC14
ENSBGRG00000000343	13	0.539638	39	1.36589	7	0.257328	10	0.337125	18	0.783244	0	0	0	0	7	0.309289	48	1.37473	3	8596101	8612738	+	2793	SLAMF7
ENSBGRG00000000344	0	0	0	0	0	0	0	0	0	0	0	0	0	0	0	0	0	0	3	37373076	37442987	-	1223	-
ENSBGRG00000000345	138	19.6314	107	12.8425	155	19.5269	119	13.7484	203	30.2715	82	8.54426	47	6.30731	181	27.4068	23	2.25745	4	64590998	64608421	+	815	-
ENSBGRG00000000346	0	0	0	0	0	0	0	0	0	0	0	0	0	0	0	0	0	0	5	39063762	39065704	+	369	-
ENSBGRG00000000347	85	7.68707	117	8.92732	86	6.88763	29	2.12996	46	4.36079	163	10.7974	77	6.56911	152	14.6316	88	5.49089	3	63316728	63488101	+	1282	DDAH1
ENSBGRG00000000348	0	0	0	0	0	0	0	0	0	0	0	0	0	0	0	0	0	0	5	75842684	75865810	+	378	C12orf54
ENSBGRG00000000350	9	0.393756	34	1.25504	56	2.16971	14	0.497444	35	1.60516	23	0.737056	8	0.330178	18	0.838231	9	0.271672	1	137555887	137621765	-	2650	PLS1
ENSBGRG00000000351	777	38.2201	329	13.654	337	14.6801	868	34.6755	386	19.9032	1261	45.4333	891	41.3449	345	18.0633	1499	50.8733	4	64767578	64910849	+	2357	EEPD1
ENSBGRG00000000352	39	1.65143	15	0.535896	11	0.412495	0	0	20	0.887752	0	0	12	0.479349	0	0	37	1.08098	4	95852837	96005322	+	2738	IGF2BP3
ENSBGRG00000000354	0	0	0	0	0	0	0	0	0	0	0	0	0	0	0	0	0	0	3	37442719	37449059	-	1336	-
ENSBGRG00000000355	0	0	0	0	0	0	0	0	0	0	0	0	0	0	0	0	0	0	5	39206815	39207905	+	498	PMCH
ENSBGRG00000000356	0	0	0	0	7	0.435585	0	0	0	0	0	0	0	0	0	0	0	0	6	54703762	54743543	-	1650	SPATA18
ENSBGRG00000000358	207	34.8829	192	27.2983	164	24.4745	352	48.1744	281	49.6379	561	69.2457	289	45.9424	286	51.2997	331	38.4846	5	110715997	110722194	-	688	PTMS
ENSBGRG00000000359	0	0	0	0	0	0	0	0	0	0	0	0	0	0	0	0	0	0	5	75928000	75961355	+	954	-
ENSBGRG00000000360	697	20.747	876	21.9998	598	15.7635	563	13.6102	681	21.2488	468	10.2037	363	10.193	565	17.901	208	4.27173	3	20807333	20830767	+	3895	PRPF3
ENSBGRG00000000361	106	6.24787	218	10.8411	103	5.37641	111	5.3135	42	2.59502	148	6.38963	205	11.3986	222	13.9279	159	6.46607	3	106484429	106660984	+	1967	SPATA6
ENSBGRG00000000362	9	0.372662	17	0.593901	24	0.88006	43	1.44601	0	0	32	0.970533	1	0.0390612	0	0	80	2.28549	5	47383246	47389403	+	2800	-
ENSBGRG00000000364	0	0	0	0	0	0	0	0	26	8.35943	0	0	0	0	0	0	0	0	8	18726833	18729123	-	378	-
ENSBGRG00000000366	22	1.21576	18	0.839248	45	2.20225	73	3.27627	47	2.72262	82	3.31915	65	3.38853	95	5.58798	65	2.47831	5	124587851	124601183	+	2098	FAM118A
ENSBGRG00000000367	9	0.858809	0	0	37	3.12669	0	0	0	0	0	0	0	0	0	0	0	0	7	91233300	91234514	+	1215	-
ENSBGRG00000000369	0	0	0	0	0	0	0	0	0	0	0	0	0	0	0	0	0	0	3	53737996	53900118	+	6813	ABCA4
ENSBGRG00000000370	0	0	0	0	0	0	0	0	0	0	31	1.22731	50	2.54945	10	0.57532	0	0	8	21574434	21581950	+	2145	-
ENSBGRG00000000372	84	7.38914	55	4.08197	60	4.67407	46	3.28628	122	11.2497	14	0.902051	54	4.48107	70	6.5542	127	7.7079	7	52980602	53092148	-	1318	ALG2
ENSBGRG00000000373	80	11.4649	294	35.5485	166	21.0678	157	18.2731	220	33.0498	352	36.9498	105	14.1953	125	19.0677	145	14.3373	6	110654860	110660526	+	809	-
ENSBGRG00000000374	0	0	0	0	3	0.199366	0	0	1	0.0786623	0	0	0	0	0	0	0	0	2	129659603	129661147	-	1545	-
ENSBGRG00000000375	68	4.43163	112	6.15836	26	1.50057	93	4.92231	39	2.66431	147	7.01713	89	5.47164	83	5.75757	133	5.98031	2	55501131	55504100	-	1779	MARS2
ENSBGRG00000000376	28	2.19196	42	2.77407	94	6.51677	34	2.16165	66	5.41607	37	2.12161	41	3.02784	67	5.58286	114	6.1574	1	80975689	81099537	+	1481	MB21D2
ENSBGRG00000000377	81	2.78007	304	8.80313	241	7.32515	107	2.98254	72	2.59041	88	2.21229	145	4.69475	141	5.15106	89	2.10755	3	37492053	37582406	+	3378	FAM102B
ENSBGRG00000000379	98	3.76351	66	2.13847	25	0.85023	158	4.92783	65	2.61665	124	3.488	74	2.68085	85	3.4745	33	0.874377	7	27280681	27452442	+	3019	TMEFF1
ENSBGRG00000000380	43	1.09018	6	0.128343	15	0.336782	61	1.256	28	0.744136	28	0.519966	7	0.167417	0	0	94	1.64427	5	116517030	116603249	+	4573	-
ENSBGRG00000000381	4	0.249332	0	0	28	1.54563	7	0.354362	0	0	20	0.913136	0	0	0	0	0	0	5	39208282	39280596	-	1860	PARPBP
ENSBGRG00000000382	16	1.30177	1	0.0686449	0	0	0	0	0	0	1	0.0595941	0	0	0	0	0	0	1	81074671	81076095	-	1425	-
ENSBGRG00000000383	3	1.19525	21	7.0591	31	10.9377	5	1.61785	25	10.441	104	30.35	0	0	40	16.9631	78	21.4412	7	53092602	53101517	+	291	-
ENSBGRG00000000384	44	3.28059	99	6.2277	71	4.688	16	0.968839	116	9.06615	34	1.85681	27	1.89905	76	6.03143	143	7.3562	3	63542881	63553484	+	1555	BCL10
ENSBGRG00000000386	214	13.455	198	10.5033	165	9.18718	420	21.4462	201	13.2474	1033	47.5727	293	17.3784	84	5.62154	1185	51.405	5	110737148	110741293	+	1844	MLF2
ENSBGRG00000000387	40	2.06114	78	3.39106	98	4.47201	182	7.61642	47	2.5387	45	1.69843	192	9.33303	57	3.12629	47	1.67095	5	47390749	47398385	-	2250	MMP19
ENSBGRG00000000389	653	20.2645	963	25.214	1281	35.2048	574	14.4666	702	22.8363	477	10.8425	331	9.69003	981	32.404	354	7.57956	7	73345419	73473799	-	3736	-
ENSBGRG00000000390	1	0.0894592	0	0	0	0	0	0	0	0	0	0	0	0	2	0.190442	0	0	1	81108701	81109996	-	1296	-
ENSBGRG00000000391	258	28.9008	199	18.8077	132	13.0946	133	12.0997	164	19.2575	134	10.9947	71	7.50277	209	24.9197	34	2.62776	1	61324396	61340679	+	1035	ABHD10
ENSBGRG00000000392	1287	131.235	2089	179.722	2031	183.404	1984	164.302	2040	218.054	1417	105.835	1775	170.743	1831	198.731	884	62.1927	6	54744150	54781484	+	1137	SGCB
ENSBGRG00000000393	24	1.09248	11	0.422461	5	0.201558	19	0.702404	0	0	16	0.533469	0	0	0	0	37	1.16204	8	18741052	18751539	+	2547	DENND1C
ENSBGRG00000000394	80	4.05382	12	0.513037	41	1.83987	34	1.39922	15	0.796766	43	1.59599	0	0	0	0	40	1.39847	5	79595379	79631400	+	2288	ACVR1B
ENSBGRG00000000395	592	23.3297	371	12.3354	529	18.4617	350	11.2018	533	22.0181	486	14.0285	464	17.2496	358	15.0168	196	5.32919	7	8913623	9002385	+	2942	PPP2R2A
ENSBGRG00000000396	4	0.153106	0	0	20	0.677938	40	1.24343	0	0	34	0.953231	0	0	0	0	55	1.45248	8	48092851	48103066	-	3029	SHROOM1
ENSBGRG00000000397	6273	210.442	7732	218.847	7788	231.372	7046	191.969	5487	192.955	9472	232.748	5842	184.881	5705	203.713	3817	88.3479	6	95939965	96193353	+	3456	PDLIM5
ENSBGRG00000000398	0	0	0	0	0	0	0	0	0	0	43	1.25356	27	1.01374	1	0.042364	12	0.329525	8	12862676	12878690	-	2913	ASF1B
ENSBGRG00000000399	0	0	0	0	0	0	39	1.75117	0	0	30	1.2149	0	0	0	0	24	0.915505	8	5525131	5537047	-	2097	CRLF1
ENSBGRG00000000401	0	0	1	0.0838209	0	0	0	0	0	0	14	1.01877	0	0	0	0	0	0	3	20831362	20832528	-	1167	-
ENSBGRG00000000402	0	0	0	0	0	0	0	0	0	0	0	0	0	0	0	0	0	0	4	64948467	65039628	-	2574	KIAA0895
ENSBGRG00000000405	11	0.359856	0	0	0	0	0	0	0	0	0	0	0	0	0	0	0	0	3	115754101	115769876	-	3544	MFSD2A
ENSBGRG00000000406	111	5.54709	122	5.14393	119	5.26645	130	5.27615	56	2.93356	97	3.5506	95	4.47857	202	10.7449	83	2.86179	2	55518132	55604374	+	2320	RFTN2
ENSBGRG00000000408	1415	29.2015	2358	41.0568	1690	30.8862	2180	36.5373	1559	33.7256	1756	26.5437	2313	45.0296	1573	34.5529	1699	24.1913	5	4271251	4466298	-	5618	LRP6
ENSBGRG00000000409	0	0	0	0	0	0	0	0	0	0	0	0	0	0	0	0	11	2.59562	8	18752026	18753210	-	339	CRB3
ENSBGRG00000000410	65	7.41737	77	7.41344	106	10.712	86	7.97016	27	3.22972	84	7.02108	116	12.4873	80	9.71703	69	5.43254	1	61352005	61366972	+	1016	TAGLN3
ENSBGRG00000000411	42	1.24602	103	2.57814	76	1.99673	35	0.843287	53	1.64823	126	2.73801	47	1.31537	68	2.14729	77	1.5761	3	63563106	63570958	+	3908	C1orf52
ENSBGRG00000000412	138	14.7598	43	3.88027	60	5.68305	65	5.64607	52	5.83001	115	9.00921	34	3.43047	20	2.27687	182	13.4304	7	105047282	105048418	+	1084	-
ENSBGRG00000000413	204	23.3021	232	22.3586	93	9.40754	148	13.7296	73	8.74082	261	21.837	136	14.6547	154	18.7237	120	9.45721	6	110692284	110716430	+	1015	-
ENSBGRG00000000415	52	4.43297	157	11.2923	132	9.96539	105	7.26963	79	7.05966	105	6.55645	96	7.72034	101	9.16473	74	4.35252	5	39283245	39335423	+	1360	NUP37
ENSBGRG00000000416	89	4.02284	7	0.266952	0	0	0	0	12	0.568577	20	0.662157	72	3.07007	0	0	64	1.99591	6	54789579	54812052	+	2565	LRRC66
ENSBGRG00000000417	299	15.6293	209	9.21739	354	16.3871	223	9.46685	288	15.7807	210	8.04037	177	8.72802	394	21.9216	195	7.03268	5	15412953	15466154	+	2218	ETNK1
ENSBGRG00000000418	0	0	0	0	26	2.01473	18	1.27914	29	2.65997	15	0.961377	44	3.63196	0	0	0	0	1	81173014	81847830	+	1325	FGF12
ENSBGRG00000000419	38	0.905775	40	0.804432	24	0.506614	63	1.21958	0	0	6	0.104755	3	0.0674577	25	0.634284	11	0.180903	3	37593445	37638395	-	4864	HENMT1
ENSBGRG00000000420	1866	35.7887	1863	30.1467	1887	32.0505	1838	28.6293	2136	42.9438	1275	17.9115	1251	22.6342	1466	29.9278	1656	21.9135	2	4980451	5362683	-	6045	EIF4G3
ENSBGRG00000000421	1781	30.541	1763	25.5073	1701	25.8317	1881	26.1963	1385	24.8963	1900	23.865	1704	27.5653	1237	22.5785	3284	38.8544	8	21590418	21682225	-	6761	-
ENSBGRG00000000422	671	17.6687	669	14.8628	770	17.9557	740	15.8251	544	15.0157	649	12.5174	772	19.1766	543	15.2191	1012	18.3857	3	20839780	20942258	+	4403	RPRD2
ENSBGRG00000000423	0	0	0	0	0	0	0	0	0	0	0	0	0	0	0	0	0	0	7	53692768	53693865	+	1098	-
ENSBGRG00000000424	0	0	0	0	0	0	0	0	0	0	0	0	0	0	0	0	0	0	3	96918474	96970026	+	2149	C8B
ENSBGRG00000000425	213	25.2506	256	25.605	153	16.0625	236	22.7214	145	18.0187	325	28.2204	128	14.3145	180	22.7128	305	24.9464	5	110760342	110767598	-	978	COPS7A
ENSBGRG00000000426	0	0	0	0	0	0	0	0	0	0	0	0	0	0	0	0	0	0	5	75979076	75980386	+	1311	-
ENSBGRG00000000427	0	0	0	0	0	0	0	0	0	0	0	0	0	0	0	0	0	0	8	5545005	5552316	+	2611	TMEM59L
ENSBGRG00000000428	525	7.47489	540	6.48683	360	4.53918	198	2.28951	312	4.65656	252	2.62806	282	3.78764	434	6.57722	124	1.21811	1	137719406	137847000	+	8143	ATR
ENSBGRG00000000429	33	3.51331	156	14.0126	70	6.59978	42	3.63148	72	8.03526	62	4.83484	8	0.803463	0	0	74	5.43565	7	105083847	105160425	-	1089	CAAP1
ENSBGRG00000000430	111	2.26213	49	0.842526	22	0.397051	57	0.943411	27	0.576797	264	3.94082	78	1.49956	153	3.31889	281	3.9511	8	18756798	18775493	+	5689	SLC25A23
ENSBGRG00000000431	32	2.53073	42	2.80245	0	0	16	1.02766	0	0	0	0	0	0	0	0	11	0.600214	8	48128337	48131965	-	1466	GDF9
ENSBGRG00000000433	291	12.9663	224	8.421	288	11.3643	333	12.0503	255	11.9105	448	14.6214	262	11.0128	291	13.8014	190	5.84109	1	168544388	168877971	-	2602	TBC1D5
ENSBGRG00000000434	0	0	0	0	0	0	0	0	0	0	0	0	0	0	0	0	0	0	5	75998905	75999834	+	930	-
ENSBGRG00000000435	181	7.87429	207	7.59795	131	5.047	115	4.06315	238	10.8536	103	3.28215	173	7.09991	154	7.13117	42	1.26067	8	78421010	78444235	-	2665	SLU7
ENSBGRG00000000436	0	0	0	0	0	0	0	0	0	0	0	0	0	0	0	0	0	0	6	54871374	54873026	+	1653	-
ENSBGRG00000000437	583	19.3509	580	16.2425	743	21.8398	700	18.8695	696	24.2162	765	18.5986	795	24.8927	685	24.2008	433	9.91601	2	129772060	129973752	+	3493	OSBPL6
ENSBGRG00000000438	0	0	0	0	0	0	9	0.376971	0	0	0	0	0	0	0	0	35	1.24543	3	131166609	131179811	+	2248	-
ENSBGRG00000000439	203	10.8359	221	9.95303	149	7.04345	185	8.01999	97	5.42759	203	7.93697	238	11.9845	157	8.92025	55	2.02559	3	37635373	37642983	+	2172	-
ENSBGRG00000000440	23	2.21295	41	3.32828	2	0.170413	35	2.73491	31	3.12658	68	4.79226	12	1.08918	21	2.15065	54	3.58471	5	47428248	47450592	-	1205	PYM1
ENSBGRG00000000441	10	1.97175	21	3.49353	0	0	29	4.6439	8	1.65351	0	0	0	0	25	5.24686	23	3.12895	5	39310612	39312247	+	588	-
ENSBGRG00000000442	0	0	0	0	0	0	0	0	0	0	0	0	0	0	0	0	0	0	5	76019403	76020326	+	924	-
ENSBGRG00000000443	0	0	0	0	0	0	0	0	0	0	0	0	0	0	0	0	0	0	3	106630812	106631822	-	1011	-
ENSBGRG00000000444	169	22.7305	263	29.845	148	17.6284	259	28.2914	98	13.817	146	14.3835	152	19.2859	54	7.73078	97	9.00144	7	9014006	9039300	+	862	-
ENSBGRG00000000445	20	2.24688	29	2.74879	14	1.39286	0	0	1	0.117765	0	0	0	0	0	0	0	0	8	12890590	12891621	+	1032	-
ENSBGRG00000000446	30	1.28774	32	1.15891	0	0	0	0	0	0	22	0.691698	16	0.647887	0	0	17	0.503468	5	82277718	82306455	+	2701	PDE1B
ENSBGRG00000000447	0	0	0	0	0	0	0	0	0	0	0	0	0	0	0	0	0	0	7	53764989	53765246	+	258	-
ENSBGRG00000000448	0	0	0	0	0	0	0	0	0	0	0	0	0	0	0	0	0	0	5	76066725	76067663	+	939	-
ENSBGRG00000000449	5	0.678007	0	0	0	0	0	0	0	0	0	0	0	0	0	0	0	0	5	110797192	110801957	+	855	PIANP
ENSBGRG00000000450	0	0	0	0	3	0.118744	0	0	0	0	0	0	0	0	0	0	0	0	1	61390008	61447221	+	2594	TMPRSS7
ENSBGRG00000000452	0	0	0	0	0	0	0	0	0	0	0	0	0	0	0	0	0	0	5	76111538	76112473	+	936	-
ENSBGRG00000000453	114	2.84483	79	1.6633	48	1.06077	130	2.63467	64	1.67416	123	2.24825	316	7.43895	44	1.16872	212	3.6501	8	12900573	12954680	-	4646	ADGRL1
ENSBGRG00000000454	0	0	0	0	0	0	0	0	0	0	0	0	0	0	0	0	0	0	5	15643709	15644909	-	582	-
ENSBGRG00000000455	1037	48.246	930	36.5055	978	40.2949	946	35.7442	1065	51.9394	983	33.4984	742	32.5656	1115	55.2159	983	31.5539	7	105172659	105215444	-	2492	PLAA
ENSBGRG00000000456	208	4.73035	162	3.10841	206	4.14884	215	3.97101	114	2.71769	83	1.3826	248	5.32054	241	5.83384	123	1.92998	3	63620928	63663900	+	5098	SYDE2
ENSBGRG00000000457	354	18.8962	440	19.816	498	23.5412	295	12.7886	400	22.3818	322	12.5897	325	16.3654	426	24.204	251	9.24404	3	37644008	37761173	+	2172	STXBP3
ENSBGRG00000000458	0	0	0	0	0	0	0	0	0	0	0	0	0	0	0	0	0	0	3	131190053	131194161	-	921	-
ENSBGRG00000000459	54	1.69437	78	2.06492	117	3.2511	52	1.32511	75	2.46685	40	0.919314	106	3.13758	189	6.31225	16	0.34638	6	54881331	54958447	-	3695	-
ENSBGRG00000000460	81	3.41369	107	3.80466	53	1.97808	163	5.57903	137	6.05237	119	3.67346	240	9.54167	73	3.27468	330	9.59558	5	116620072	116635026	+	2751	IL17RA
ENSBGRG00000000461	83	2.60291	613	16.2194	0	0	45	1.14611	7	0.230114	16	0.367527	36	1.06502	6	0.200281	22	0.476015	7	53778603	53824688	+	3697	NR4A3
ENSBGRG00000000462	0	0	0	0	0	0	0	0	0	0	0	0	0	0	0	0	0	0	5	76141032	76169294	+	345	-
ENSBGRG00000000463	37	1.39368	137	4.35387	65	2.16822	0	0	82	3.23773	58	1.60021	67	2.38073	28	1.1226	15	0.389826	5	39354897	39432096	+	3078	WASHC3
ENSBGRG00000000464	100	4.73028	133	5.30801	45	1.88507	224	8.60532	80	3.96682	96	3.32618	219	9.77248	124	6.24332	72	2.34983	5	47460672	47478680	+	2451	DGKA
ENSBGRG00000000465	3	0.232966	0	0	0	0	0	0	0	0	0	0	0	0	0	0	0	0	3	8660530	8665667	-	1493	-
ENSBGRG00000000466	33	1.09158	28	0.781435	8	0.234348	25	0.671605	6	0.208046	92	2.22904	19	0.592884	33	1.16188	247	5.63711	8	5575392	5608149	+	3505	KLHL26
ENSBGRG00000000467	208	13.8594	258	14.5042	257	15.165	284	15.3685	219	15.2964	228	11.1277	254	15.9657	165	11.7023	292	13.424	5	110819473	110831429	+	1740	ZNF384
ENSBGRG00000000468	251	22.5937	508	38.5808	275	21.9218	675	49.3458	305	28.7792	1064	70.1527	389	33.0322	253	24.2405	1035	64.2795	8	48133310	48141670	+	1288	-
ENSBGRG00000000469	2965	81.3055	2400	55.5264	3499	84.9705	3583	79.7947	2946	84.6824	2809	56.4203	2924	75.6391	3161	92.2628	1886	35.6824	7	91311392	91579164	-	4228	NFIB
ENSBGRG00000000470	0	0	0	0	0	0	0	0	0	0	0	0	0	0	0	0	0	0	5	124605882	124700068	-	4461	SMC1B
ENSBGRG00000000471	0	0	0	0	0	0	0	0	0	0	0	0	0	0	0	0	0	0	3	106681471	106727793	-	3378	SLC5A9
ENSBGRG00000000474	7	2.81797	19	6.45333	29	10.3387	16	5.23106	11	4.6419	18	5.3076	0	0	66	28.2806	0	0	2	143491395	143491682	+	288	C2orf88
ENSBGRG00000000475	23	1.36539	38	1.90329	1	0.0525723	35	1.68744	36	2.24025	58	2.52199	57	3.1921	50	3.1594	14	0.573421	3	8689519	8721147	+	1953	LY9
ENSBGRG00000000477	0	0	0	0	0	0	0	0	0	0	0	0	0	0	1	0.0986461	0	0	2	79701739	79702989	+	1251	-
ENSBGRG00000000478	0	0	0	0	0	0	0	0	0	0	0	0	0	0	0	0	0	0	2	32594906	32601030	+	2079	IHH
ENSBGRG00000000479	0	0	0	0	0	0	0	0	0	0	0	0	0	0	0	0	0	0	5	76162947	76193778	-	1648	-
ENSBGRG00000000480	17	1.78046	0	0	0	0	0	0	0	0	75	5.7535	0	0	0	0	8	0.578083	8	18778156	18788069	+	1107	SLC25A41
ENSBGRG00000000481	10	0.552091	16	0.745287	32	1.56455	75	3.36282	19	1.09959	27	1.09185	39	2.03118	10	0.587649	49	1.86648	2	143639568	143681722	+	2100	INPP1
ENSBGRG00000000482	0	0	0	0	0	0	0	0	0	0	0	0	0	0	0	0	0	0	7	9097043	9098242	-	1200	-
ENSBGRG00000000483	0	0	0	0	0	0	0	0	2	0.198098	0	0	21	1.87188	0	0	0	0	2	79878844	79880070	+	1227	-
ENSBGRG00000000485	1154	67.4364	1233	60.7917	1687	87.3037	1275	60.5105	1386	84.9018	1588	67.9716	1277	70.3968	1119	69.6026	1106	44.5924	7	27447316	27464204	+	1984	CAVIN4
ENSBGRG00000000487	559	51.4774	831	64.5652	891	72.6627	497	37.17	392	37.8404	419	28.2622	340	29.5364	155	15.193	373	23.699	2	55617991	55647991	-	1259	-
ENSBGRG00000000489	0	0	0	0	0	0	2	0.0997976	1	0.0644056	11	0.495039	0	0	0	0	0	0	2	80034002	80035888	-	1887	-
ENSBGRG00000000490	7	0.741164	0	0	0	0	0	0	0	0	0	0	0	0	0	0	0	0	7	9149923	9151017	-	1095	PNMA2
ENSBGRG00000000492	0	0	0	0	14	1.32604	0	0	0	0	0	0	0	0	42	4.78142	0	0	8	78445663	78454376	+	1084	-
ENSBGRG00000000493	571	15.6172	793	18.2992	806	19.5223	728	16.1707	716	20.5279	870	17.4291	521	13.4424	809	23.5517	596	11.2468	6	110772632	110796639	-	4239	ETNPPL
ENSBGRG00000000494	0	0	0	0	6	0.176314	0	0	0	0	0	0	0	0	0	0	0	0	3	63695764	63768194	-	3494	DNAI3
ENSBGRG00000000495	0	0	0	0	0	0	0	0	5	0.585421	0	0	0	0	0	0	0	0	3	20864865	20865902	-	1038	-
ENSBGRG00000000496	0	0	14	0.829979	0	0	19	1.08426	13	0.957535	0	0	0	0	0	0	0	0	2	80087526	80089175	-	1650	-
ENSBGRG00000000499	104	8.33864	99	6.69715	230	16.3312	295	19.2095	208	17.482	91	5.34431	69	5.21897	252	21.5065	235	13.0001	1	82541012	82627010	-	1446	CCDC50
ENSBGRG00000000500	7	0.471845	44	2.50235	1	0.059694	10	0.547436	34	2.4024	29	1.43182	11	0.699468	20	1.43496	20	0.930142	7	27900908	28221258	+	1720	PLPPR1
ENSBGRG00000000501	25	2.01283	30	2.03789	23	1.63993	62	4.05407	5	0.421991	26	1.53331	23	1.7469	43	3.68505	84	4.66621	5	79644213	79655297	+	1440	TAMALIN
ENSBGRG00000000502	18	1.88519	66	5.83202	0	0	18	1.53104	26	2.85444	45	3.4521	34	3.35919	0	0	17	1.22843	3	8726959	8768045	-	1107	CD244
ENSBGRG00000000503	249	29.2195	225	22.2766	240	24.941	188	17.9169	208	25.586	157	13.4946	111	12.2877	301	37.5964	248	20.079	3	53960903	53978251	+	988	GCLM
ENSBGRG00000000504	2971	74.1402	2194	46.1935	2329	51.4695	1904	38.5878	1688	44.1559	1792	32.755	1862	43.8333	1675	44.4911	1116	19.2147	8	48148686	48207960	-	4646	AFF4
ENSBGRG00000000505	83	2.95727	202	6.07235	60	1.89318	156	4.51408	88	3.2867	101	2.63586	81	2.72252	176	6.67471	101	2.48286	2	143743544	143813318	+	3254	MFSD6
ENSBGRG00000000506	0	0	0	0	0	0	0	0	0	0	0	0	0	0	0	0	35	2.44304	1	61459686	61503362	+	1146	C3orf52
ENSBGRG00000000507	111	6.76261	167	8.58422	186	10.0354	108	5.34376	187	11.9426	142	6.33677	90	5.17258	177	11.4781	190	7.98661	7	53868745	53947346	+	1903	STX17
ENSBGRG00000000508	28	0.382999	40	0.461628	0	0	7	0.0777623	0	0	21	0.2104	14	0.180651	0	0	119	1.12306	3	131207149	131318770	-	8476	KIF1A
ENSBGRG00000000510	0	0	0	0	0	0	0	0	0	0	0	0	0	0	0	0	0	0	2	32625404	32667885	+	5223	CFAP65
ENSBGRG00000000512	302	17.4893	245	11.9709	400	20.5142	250	11.7581	199	12.0805	154	6.53243	331	18.0829	192	11.8352	164	6.55281	7	105224789	105320870	+	2002	IFT74
ENSBGRG00000000513	0	0	0	0	2	0.154862	0	0	0	0	0	0	0	0	0	0	0	0	3	115823373	115827663	+	1326	MYCL
ENSBGRG00000000516	53	1.48067	57	1.34354	66	1.63288	123	2.79074	102	2.98708	48	0.982226	12	0.316255	231	6.86912	26	0.501156	4	65038411	65101821	+	4150	ANLN
ENSBGRG00000000517	402	15.6769	297	9.77203	241	8.32303	359	11.37	197	8.05317	509	14.5392	250	9.19706	207	8.59236	478	12.8612	8	18789725	18802265	+	2973	KHSRP
ENSBGRG00000000520	1175	29.2902	1737	36.5323	1610	35.5418	1521	30.7925	683	17.8472	1916	34.9838	1203	28.2894	903	23.9595	1880	32.334	7	9156837	9290740	+	4651	DPYSL2
ENSBGRG00000000521	208	78.0432	324	102.567	270	89.7149	138	42.0516	101	39.7245	256	70.3558	211	74.684	248	99.0445	158	40.9022	2	55661131	55662998	-	309	HSPE1
ENSBGRG00000000522	0	0	0	0	0	0	0	0	0	0	0	0	0	0	0	0	0	0	7	73434123	73435208	+	1086	-
ENSBGRG00000000523	466	28.9382	441	23.1056	377	20.7327	350	17.6517	145	9.43885	631	28.7014	1599	93.6716	366	24.1921	1892	81.0633	5	79685579	79706359	+	1867	NR4A1
ENSBGRG00000000525	383	140.967	605	187.875	462	150.588	617	184.432	574	221.461	624	168.226	542	188.188	629	246.421	383	97.2604	4	17326964	17332380	-	315	-
ENSBGRG00000000526	411	13.3364	486	13.3053	312	8.96563	474	12.4913	161	5.47631	322	7.65317	651	19.9275	256	8.84187	616	13.791	8	13116854	13135617	+	3573	ADGRE5
ENSBGRG00000000527	0	0	0	0	0	0	0	0	0	0	0	0	0	0	0	0	0	0	7	73475867	73476898	-	1032	-
ENSBGRG00000000528	160	5.06699	186	4.96977	152	4.26288	208	5.34965	115	3.81763	124	2.87634	146	4.36171	133	4.48321	208	4.54476	2	80720712	81144769	+	3661	MGAT5
ENSBGRG00000000529	387	26.4399	684	39.4273	488	29.5255	509	28.2422	435	31.1532	552	27.6233	471	30.3559	498	36.2147	458	21.5889	7	53965416	54070749	-	1697	ERP44
ENSBGRG00000000530	47	1.79307	172	5.53631	59	1.99334	151	4.67852	76	3.03933	129	3.60477	106	3.81486	40	1.6243	51	1.34242	5	16470627	17070226	-	3039	SOX5
ENSBGRG00000000533	0	0	0	0	1	0.11761	0	0	0	0	0	0	0	0	0	0	0	0	1	61508029	61522356	-	873	GCSAM
ENSBGRG00000000534	829	42.3781	804	34.6766	893	40.4266	709	29.4351	754	40.4039	529	19.8076	432	20.8327	676	36.7825	417	14.7076	3	53989908	54001750	+	2268	DNTTIP2
ENSBGRG00000000535	169	8.69287	187	8.11542	143	6.5139	372	15.54	128	6.90163	675	25.4313	208	10.0928	101	5.52974	871	30.9109	8	21617926	21660348	-	2254	-
ENSBGRG00000000536	0	0	31	1.69029	0	0	0	0	0	0	0	0	0	0	2	0.137577	0	0	7	28014394	28016187	-	1794	-
ENSBGRG00000000537	128	13.5899	143	12.8096	131	12.3171	88	7.58791	186	20.7007	62	4.82156	65	6.5102	66	7.45862	70	5.12771	3	8798298	8799921	-	1092	-
ENSBGRG00000000539	2032	92.3514	2727	104.568	1669	67.1746	1493	55.1076	1202	57.265	2363	78.6632	1253	53.721	1694	81.9483	958	30.0402	2	55663553	55673581	+	2551	-
ENSBGRG00000000541	793	56.0267	1152	68.67	991	62.0047	1732	99.3805	1105	81.8369	2595	134.291	1005	66.9825	1038	78.0595	3283	160.033	5	82308320	82317618	-	1641	-
ENSBGRG00000000542	70	2.83371	103	3.51793	35	1.25474	111	3.64932	15	0.636522	225	6.67157	141	5.38456	44	1.89591	356	9.94317	8	5624668	5721518	+	2864	CRTC1
ENSBGRG00000000543	142	6.13618	49	1.78648	72	2.75531	88	3.08833	111	5.02803	121	3.82986	80	3.26117	91	4.1856	150	4.47217	4	96008535	96090725	-	2683	GPNMB
ENSBGRG00000000545	15	1.28821	0	0	0	0	0	0	12	1.0803	19	1.19519	34	2.75454	0	0	0	0	5	39479404	39530641	-	1350	-
ENSBGRG00000000546	223	15.7265	216	12.8521	217	13.5524	351	20.1033	190	14.0458	275	14.2053	301	20.0248	171	12.836	178	8.66096	3	115842732	115887699	+	1644	TRIT1
ENSBGRG00000000547	0	0	0	0	0	0	0	0	0	0	0	0	0	0	0	0	0	0	3	37659037	37694442	+	2433	FNDC7
ENSBGRG00000000548	119	18.4696	120	15.7139	142	19.5176	83	10.4621	56	9.11093	110	12.5052	96	14.0558	47	7.76451	186	19.9177	5	110834649	110841705	+	747	-
ENSBGRG00000000549	49	3.72038	0	0	25	1.68097	90	5.54965	38	3.0244	159	8.84253	64	4.584	18	1.45469	226	11.8391	5	79718666	79725693	+	1527	ATG101
ENSBGRG00000000550	13	0.768592	56	2.7934	39	2.04196	67	3.21706	45	2.78888	54	2.33848	123	6.86011	61	3.83875	30	1.22375	2	143821856	143849237	-	1961	NEMP2
ENSBGRG00000000551	42	2.24192	25	1.12591	27	1.27633	158	6.84951	22	1.231	135	5.27828	68	3.42415	65	3.6931	184	6.7765	4	17336991	17351187	-	2172	ADCK2
ENSBGRG00000000552	3	0.0705512	0	0	0	0	16	0.305587	0	0	0	0	0	0	0	0	0	0	8	78687206	78835248	-	4930	ATP10B
ENSBGRG00000000553	0	0	0	0	0	0	0	0	0	0	0	0	0	0	0	0	0	0	3	96981322	97064870	-	1770	C8A
ENSBGRG00000000554	16	0.696854	46	1.69034	38	1.46567	76	2.68824	10	0.456549	14	0.44662	9	0.369776	0	0	45	1.35223	7	28233805	28276215	-	2662	-
ENSBGRG00000000555	10	0.337818	0	0	13	0.388916	44	1.20717	5	0.177059	0	0	0	0	0	0	15	0.349616	1	61542112	61654959	-	3432	SLC9C1
ENSBGRG00000000556	0	0	0	0	0	0	0	0	0	0	0	0	0	0	0	0	0	0	7	105227100	105251240	-	1919	LRRC19
ENSBGRG00000000557	195	7.66118	117	3.87828	191	6.64544	221	7.05156	164	6.75414	242	6.96409	260	9.63625	136	5.68731	629	17.0502	3	20951010	20966019	+	2951	TARS2
ENSBGRG00000000559	13	1.13239	39	2.86622	9	0.694263	22	1.55635	0	0	82	5.23184	25	2.05431	0	0	142	8.53411	5	116651860	116665517	-	1331	HDHD5
ENSBGRG00000000561	45	1.88417	45	1.58969	26	0.964072	60	2.04028	35	1.53617	21	0.644043	0	0	36	1.60441	13	0.37555	7	73488628	73676469	-	2769	MAMDC2
ENSBGRG00000000563	9	0.459468	0	0	8	0.361686	0	0	0	0	0	0	0	0	0	0	0	0	5	47479018	47489316	-	2271	PMEL
ENSBGRG00000000564	0	0	0	0	0	0	0	0	0	0	0	0	0	0	0	0	0	0	3	37815327	37819879	-	1208	-
ENSBGRG00000000565	0	0	0	0	0	0	0	0	0	0	0	0	0	0	0	0	0	0	8	21741801	21807659	-	3876	CELF5
ENSBGRG00000000566	120	8.4473	191	11.3439	169	10.5354	150	8.57551	97	7.1577	50	2.57807	135	8.96487	127	9.51584	51	2.47699	2	55683854	55700774	-	1647	COQ10B
ENSBGRG00000000567	0	0	0	0	0	0	0	0	0	0	0	0	0	0	0	0	0	0	6	54990450	55049522	-	3000	CWH43
ENSBGRG00000000568	0	0	0	0	0	0	0	0	0	0	0	0	0	0	0	0	0	0	3	97105319	97106557	+	1239	-
ENSBGRG00000000569	0	0	0	0	0	0	0	0	0	0	0	0	0	0	0	0	0	0	3	8816444	8827181	-	1100	-
ENSBGRG00000000571	49	2.82357	59	2.86845	0	0	37	1.73155	52	3.14102	73	3.08115	49	2.66362	42	2.57607	54	2.14691	5	39534073	39585350	-	2012	DRAM1
ENSBGRG00000000572	0	0	0	0	0	0	0	0	0	0	0	0	0	0	0	0	0	0	3	54074872	54075945	-	1074	-
ENSBGRG00000000573	69	5.32965	86	5.60455	11	0.752439	42	2.6347	49	3.96744	170	9.61804	30	2.18597	54	4.43966	92	4.90292	7	28288479	28305315	-	1501	MRPL50
ENSBGRG00000000574	12	0.812183	0	0	0	0	0	0	0	0	0	0	0	0	0	0	13	0.607063	5	79781239	79804568	-	1713	KRT80
ENSBGRG00000000576	0	0	0	0	0	0	11	0.719271	10	0.843981	0	0	13	0.987381	0	0	0	0	3	97117274	97200633	+	1440	-
ENSBGRG00000000579	0	0	0	0	0	0	0	0	0	0	0	0	0	0	0	0	0	0	1	82673691	82714737	+	524	-
ENSBGRG00000000580	7	1.59132	106	20.331	4	0.805284	61	11.2622	11	2.62131	100	16.6513	44	9.43597	13	3.14565	20	3.13695	8	48264924	48279172	-	510	ZCCHC10
ENSBGRG00000000581	361	19.6775	265	12.1871	237	11.4404	429	18.9912	204	11.6562	519	20.7214	455	23.3963	184	10.6755	736	27.6795	1	90314125	90321663	-	2127	ABCF3
ENSBGRG00000000583	325	8.87011	281	6.4706	289	6.9851	296	6.56099	235	6.72324	444	8.87599	246	6.33366	300	8.71513	181	3.40833	7	54074419	54217126	+	4248	INVS
ENSBGRG00000000584	238	12.9244	147	6.73508	282	13.5616	140	6.17436	181	10.3033	225	8.94959	151	7.7354	130	7.5142	178	6.66914	7	28310461	28318128	+	2135	ZNF189
ENSBGRG00000000585	0	0	0	0	0	0	0	0	0	0	0	0	0	0	0	0	0	0	5	76174483	76178724	+	930	OR5BS1P
ENSBGRG00000000587	69	2.12535	89	2.31294	197	5.37373	182	4.55286	207	6.68369	43	0.970146	300	8.71717	155	5.08182	177	3.76159	3	37818644	37912054	+	3764	GPSM2
ENSBGRG00000000589	0	0	0	0	0	0	0	0	0	0	0	0	0	0	0	0	0	0	5	82344748	82347585	-	564	-
ENSBGRG00000000591	52	2.35318	36	1.37451	64	2.56484	90	3.30769	74	3.51033	106	3.51354	18	0.768417	99	4.76862	206	6.43185	3	54199246	54330059	+	2562	BCAR3
ENSBGRG00000000592	0	0	0	0	0	0	0	0	0	0	0	0	0	0	0	0	0	0	8	79477705	79477911	+	207	-
ENSBGRG00000000593	2072	97.8119	1567	62.4114	2073	86.6623	1998	76.6001	1539	76.1563	1814	62.7231	2232	99.3962	1863	93.6099	1906	62.0786	3	97279152	97356663	-	2456	PRKAA2
ENSBGRG00000000594	124	6.22088	78	3.30155	178	7.90823	126	5.13373	126	6.62622	35	1.28613	29	1.37247	63	3.36417	61	2.11143	1	41153795	41238379	+	2311	ARL13B
ENSBGRG00000000595	265	7.19866	334	7.655	268	6.44718	729	16.0829	356	10.1373	507	10.0879	443	11.3523	220	6.36115	597	11.1892	4	17388401	17488328	+	4268	DENND2A
ENSBGRG00000000596	0	0	0	0	0	0	0	0	0	0	0	0	0	0	0	0	0	0	5	110843611	110851819	+	1629	ACRBP
ENSBGRG00000000597	298	16.4054	226	10.4972	372	18.1361	212	9.4785	263	15.1772	203	8.1857	290	15.0606	339	19.8645	264	10.0275	5	76265093	76285849	-	2106	KANSL2
ENSBGRG00000000599	239	6.13856	177	3.83561	152	3.45733	192	4.00499	90	2.42313	325	6.11421	121	2.93175	287	7.84616	218	3.86316	7	28331910	28456964	-	4514	-
ENSBGRG00000000602	0	0	0	0	0	0	0	0	0	0	0	0	0	0	0	0	0	0	5	82554255	82561068	+	348	-
ENSBGRG00000000603	157	4.92891	177	4.68832	273	7.59001	219	5.58376	144	4.73891	160	3.67925	290	8.5886	186	6.21542	366	7.92774	2	143964448	144016542	+	3693	NAB1
ENSBGRG00000000604	4388	110.093	4515	95.5751	5272	117.138	3813	77.695	3555	93.4973	3076	56.5287	3365	79.644	3455	92.2676	2703	46.7905	2	55725266	55810328	+	4621	SF3B1
ENSBGRG00000000606	0	0	0	0	0	0	0	0	13	3.67426	0	0	0	0	0	0	0	0	1	82694294	82718099	-	430	OSTN
ENSBGRG00000000608	0	0	0	0	0	0	0	0	0	0	0	0	0	0	0	0	0	0	5	79850993	79865041	+	1560	KRT7
ENSBGRG00000000609	0	0	0	0	0	0	15	2.94247	0	0	0	0	0	0	0	0	0	0	4	52517297	52517776	+	480	-
ENSBGRG00000000610	1	0.0515744	0	0	0	0	0	0	6	0.324377	28	1.05774	10	0.486528	23	1.26261	10	0.355837	2	81158257	81464974	-	2248	TMEM163
ENSBGRG00000000611	4	0.230955	4	0.194858	143	7.31192	1	0.046892	3	0.181574	4	0.169167	53	2.8868	8	0.491658	3	0.11951	5	82607293	82609348	+	2008	-
ENSBGRG00000000612	0	0	0	0	0	0	0	0	0	0	0	0	0	0	0	0	0	0	6	96484141	96485295	-	1155	-
ENSBGRG00000000613	0	0	0	0	0	0	0	0	0	0	0	0	0	0	0	0	0	0	8	79500252	79812001	-	2868	GABRB2
ENSBGRG00000000614	0	0	0	0	0	0	0	0	0	0	0	0	0	0	0	0	0	0	5	4382188	4383633	+	1446	-
ENSBGRG00000000616	0	0	0	0	12	0.456666	34	1.18659	17	0.765777	0	0	0	0	23	1.05202	0	0	5	116673550	116702044	-	2698	ADA2
ENSBGRG00000000618	0	0	0	0	0	0	0	0	0	0	0	0	0	0	0	0	0	0	6	96610741	96611844	-	1104	-
ENSBGRG00000000619	82	10.3337	117	12.44	85	9.48616	251	25.689	143	18.8905	157	14.4921	49	5.82522	132	17.7061	47	4.08656	1	61726244	61748146	+	920	-
ENSBGRG00000000622	12	0.59456	9	0.376227	0	0	0	0	0	0	0	0	15	0.701099	0	0	0	0	6	110841333	111384827	-	2340	COL25A1
ENSBGRG00000000624	80	16.712	187	32.9588	141	26.0847	160	27.145	109	23.8687	130	19.8916	30	5.91197	251	55.8107	157	22.6284	5	76309973	76337310	-	555	-
ENSBGRG00000000625	0	0	0	0	0	0	0	0	0	0	0	0	0	0	0	0	0	0	3	8868270	8874695	-	1066	-
ENSBGRG00000000626	0	0	0	0	0	0	0	0	0	0	0	0	21	1.88571	0	0	0	0	4	17530499	17531716	+	1218	-
ENSBGRG00000000628	1	0.220837	3	0.558965	0	0	0	0	0	0	1	0.161755	0	0	0	0	0	0	5	82713554	82714078	-	525	-
ENSBGRG00000000629	750	22.7332	739	18.8989	661	17.7431	532	13.0961	713	22.6544	578	12.8326	667	19.0721	829	26.7461	346	7.2359	5	39637121	39730916	+	3825	GNPTAB
ENSBGRG00000000631	5	0.179806	77	2.33625	18	0.57324	41	1.19743	28	1.0555	65	1.71213	34	1.15342	68	2.60286	100	2.48115	1	158607612	158635406	-	3224	SLC19A1
ENSBGRG00000000632	5	0.218423	0	0	54	2.08907	40	1.41913	0	0	6	0.191986	24	0.989041	118	5.48679	54	1.62757	5	4516764	4544484	-	2654	MANSC1
ENSBGRG00000000633	85	18.6999	124	23.0162	56	10.9103	117	20.9044	74	17.0654	88	14.1805	32	6.64115	255	59.7127	82	12.4466	6	55155732	55165948	+	527	OCIAD2
ENSBGRG00000000634	0	0	0	0	0	0	0	0	0	0	0	0	0	0	0	0	0	0	3	106771164	106772874	+	714	-
ENSBGRG00000000635	0	0	0	0	0	0	0	0	0	0	0	0	0	0	0	0	0	0	1	82767899	82790103	+	504	-
ENSBGRG00000000636	0	0	0	0	0	0	0	0	0	0	0	0	0	0	0	0	0	0	2	32682166	32685380	+	840	CRYBA2
ENSBGRG00000000637	0	0	0	0	0	0	0	0	0	0	2	0.122542	0	0	0	0	0	0	3	97398585	97399970	+	1386	-
ENSBGRG00000000638	28	0.942869	34	0.965973	0	0	0	0	0	0	0	0	0	0	0	0	0	0	5	82719814	82734461	+	3443	USP44
ENSBGRG00000000639	11	0.768272	16	0.942833	1	0.0618516	8	0.453779	0	0	0	0	0	0	0	0	0	0	4	52581354	52609653	+	1660	FAM221A
ENSBGRG00000000640	0	0	0	0	0	0	0	0	0	0	0	0	0	0	0	0	0	0	5	76353777	76394306	+	396	TEX49
ENSBGRG00000000641	75	1.86758	101	2.12193	67	1.47748	203	4.1053	27	0.704768	188	3.42897	133	3.12423	25	0.662619	262	4.50128	8	21806992	21838672	-	4656	NCLN
ENSBGRG00000000642	334	16.9915	329	14.1213	467	21.0393	553	22.8477	376	20.0511	587	21.8732	398	19.1004	226	12.2377	480	16.8479	4	17539119	17583528	+	2279	MKRN1
ENSBGRG00000000643	0	0	0	0	0	0	1	0.0387965	14	0.701057	0	0	0	0	0	0	0	0	7	28444645	28447071	+	2427	-
ENSBGRG00000000644	0	0	0	0	0	0	0	0	8	0.569576	0	0	0	0	1	0.0722942	0	0	1	158648811	158650517	+	1707	-
ENSBGRG00000000645	0	0	0	0	22	0.699326	0	0	0	0	0	0	0	0	0	0	0	0	1	82914504	83039134	+	3230	GMNC
ENSBGRG00000000646	224	19.9007	228	17.0902	176	13.8472	97	6.9988	128	11.9205	48	3.12355	142	11.901	102	9.64554	11	0.674264	7	54261164	54269964	+	1305	-
ENSBGRG00000000647	8	0.840139	0	0	0	0	0	0	0	0	0	0	0	0	29	3.24165	0	0	5	110863863	110864966	+	1104	LPAR5
ENSBGRG00000000648	2101	66.2645	2543	67.6696	1800	50.2755	1902	48.7189	1937	64.0397	2046	47.266	1700	50.5798	1897	63.6838	1794	39.0386	8	48308521	48364639	+	3676	HSPA4
ENSBGRG00000000649	0	0	0	0	0	0	0	0	0	0	0	0	0	0	0	0	0	0	5	79867230	79881969	-	1506	-
ENSBGRG00000000650	0	0	0	0	0	0	0	0	0	0	0	0	0	0	0	0	0	0	2	32690937	32694636	+	711	FEV
ENSBGRG00000000651	12	0.898753	36	2.27486	0	0	8	0.48661	16	1.25616	52	2.85266	64	4.52182	64	5.10207	27	1.39521	1	61835354	61868639	-	1548	BTLA
ENSBGRG00000000652	532	44.1831	398	27.8882	439	32.2878	918	61.9183	322	28.0328	817	49.6998	703	55.0774	404	35.7135	1233	70.6521	3	97410529	97516547	+	1396	PLPP3
ENSBGRG00000000653	0	0	0	0	6	0.565695	0	0	0	0	0	0	0	0	0	0	0	0	2	81574854	81638347	+	1089	ACMSD
ENSBGRG00000000654	0	0	0	0	0	0	0	0	0	0	0	0	0	0	0	0	0	0	5	4548049	4548243	+	195	-
ENSBGRG00000000655	34	1.02308	45	1.14245	1	0.0266477	0	0	25	0.788563	1	0.0220404	42	1.19221	1	0.0320286	0	0	3	115920749	115924711	+	3853	-
ENSBGRG00000000656	0	0	0	0	0	0	0	0	0	0	0	0	0	0	0	0	0	0	7	73874811	73986433	-	693	CFAP95
ENSBGRG00000000657	294	16.841	231	11.1641	489	24.8061	219	10.1882	198	11.8891	139	5.83207	263	14.2118	274	16.7062	81	3.20127	3	54347765	54473894	-	2024	FNBP1L
ENSBGRG00000000658	197	9.28833	151	6.00678	305	12.735	139	5.32253	174	8.59975	83	2.86641	81	3.60272	155	7.77876	239	7.77476	6	96652170	96771220	+	2459	BMPR1B
ENSBGRG00000000659	0	0	0	0	0	0	0	0	0	0	0	0	0	0	0	0	0	0	3	106804951	106832178	+	2381	-
ENSBGRG00000000661	66	4.83691	123	7.60539	41	2.66095	79	4.702	66	5.07029	145	7.78359	122	8.43446	8	0.624052	162	8.19136	8	18821659	18827408	+	1582	GTF2F1
ENSBGRG00000000662	0	0	0	0	0	0	0	0	0	0	0	0	0	0	0	0	0	0	2	32722691	32723812	-	1122	CDK5R2
ENSBGRG00000000664	0	0	0	0	0	0	0	0	0	0	0	0	0	0	0	0	0	0	3	115941445	115966000	+	1215	-
ENSBGRG00000000665	0	0	0	0	0	0	0	0	0	0	0	0	0	0	0	0	0	0	7	54279834	54280994	+	1161	-
ENSBGRG00000000666	425	9.27077	411	7.56418	684	13.2133	339	6.00563	442	10.1068	490	7.82909	339	6.9759	448	10.4019	325	4.89134	7	105353124	105478161	+	5315	TEK
ENSBGRG00000000668	0	0	0	0	0	0	0	0	0	0	0	0	0	0	0	0	0	0	2	144079990	144083007	-	1706	-
ENSBGRG00000000669	12	0.588524	0	0	16	0.694915	31	1.23474	0	0	11	0.395151	0	0	0	0	13	0.439889	1	158924753	158989012	+	2364	PCBP3
ENSBGRG00000000670	98	5.38485	35	1.62259	38	1.8491	74	3.30226	57	3.28313	119	4.78942	16	0.829357	17	0.994268	84	3.18452	5	4557912	4669954	+	2110	BORCS5
ENSBGRG00000000671	0	0	0	0	0	0	0	0	0	0	0	0	0	0	0	0	0	0	7	54317176	54321763	+	4588	-
ENSBGRG00000000672	0	0	0	0	0	0	0	0	0	0	0	0	0	0	0	0	0	0	2	32771404	32785480	-	1874	WNT10A
ENSBGRG00000000673	623	14.4028	570	11.118	268	5.48685	929	17.4424	404	9.79052	873	14.783	361	7.873	423	10.4089	726	11.5801	5	76394757	76411285	-	5015	ADCY6
ENSBGRG00000000674	388	40.7099	616	54.5308	429	39.8616	301	25.6488	311	34.2053	342	26.2834	289	28.6048	364	40.6515	359	25.9884	1	61922447	61964501	-	1105	ATG3
ENSBGRG00000000675	0	0	0	0	0	0	0	0	0	0	0	0	0	0	0	0	0	0	3	98026293	98027390	+	1098	-
ENSBGRG00000000676	2640	393.925	3074	386.995	3398	449.016	2513	304.532	2252	352.243	2560	279.793	2166	304.889	3214	510.46	1964	202.194	6	55179855	55201814	-	777	OCIAD1
ENSBGRG00000000679	591	34.2429	641	31.3353	810	41.5621	564	26.5396	415	25.2056	462	19.6071	363	19.841	614	37.8668	250	9.99403	3	37911847	37930059	-	2001	CLCC1
ENSBGRG00000000680	0	0	0	0	0	0	0	0	0	0	0	0	0	0	0	0	0	0	2	144178427	144179216	+	210	-
ENSBGRG00000000682	195	4.28022	197	3.6483	110	2.13823	213	3.79702	126	2.89913	228	3.66568	81	1.67722	180	4.20544	550	8.32937	5	116767820	116901691	+	5282	CECR2
ENSBGRG00000000684	2399	47.1101	2416	40.0289	2319	40.3286	2618	41.7528	1738	35.7766	2723	39.1669	1929	35.7347	1779	37.1849	2494	33.7907	5	110883491	110916803	+	5904	CHD4
ENSBGRG00000000685	0	0	0	0	11	0.446055	0	0	0	0	0	0	19	0.820718	56	2.72936	54	1.706	7	54471304	54758009	+	2532	GABBR2
ENSBGRG00000000686	0	0	0	0	0	0	0	0	0	0	0	0	0	0	0	0	0	0	1	83130237	83130939	-	453	-
ENSBGRG00000000687	5	2.19582	11	4.07579	1	0.388916	14	4.99328	2	0.920707	0	0	0	0	2	0.934896	0	0	3	98763565	98763828	+	264	-
ENSBGRG00000000689	127	7.39542	110	5.40436	159	8.19946	172	8.13428	104	6.3483	70	2.98569	26	1.42826	41	2.54126	89	3.57574	4	96124902	96140534	-	1991	NUP42
ENSBGRG00000000690	0	0	12	7.52454	0	0	0	0	15	11.6859	0	0	1	0.701099	0	0	0	0	3	131326053	131326208	-	156	-
ENSBGRG00000000691	0	0	0	0	0	0	0	0	0	0	0	0	0	0	0	0	0	0	8	79962330	79979245	+	1362	GABRA6
ENSBGRG00000000692	0	0	0	0	0	0	0	0	0	0	0	0	0	0	0	0	11	0.468289	2	32796462	32815417	-	1879	WNT6
ENSBGRG00000000693	953	22.098	742	14.5163	790	16.2224	785	14.783	612	14.8757	699	11.872	591	12.9277	571	14.093	487	7.79124	7	28470236	28496632	+	5000	RNF20
ENSBGRG00000000694	0	0	0	0	0	0	0	0	0	0	0	0	0	0	0	0	0	0	8	18830870	18831415	+	462	PSPN
ENSBGRG00000000695	0	0	0	0	0	0	10	0.697474	0	0	0	0	0	0	0	0	0	0	3	115954606	115956157	+	1350	OXCT2
ENSBGRG00000000696	86	9.57807	163	15.3165	115	11.3424	108	9.76866	88	10.2737	126	10.2787	184	19.3317	45	5.33456	122	9.37469	5	47488138	47492349	+	1041	CDK2
ENSBGRG00000000698	0	0	0	0	0	0	0	0	0	0	0	0	0	0	0	0	0	0	3	8885950	8891485	-	1032	ITLN2
ENSBGRG00000000701	129	7.20778	203	9.56976	187	9.253	83	3.76636	85	4.97847	116	4.74743	112	5.90342	157	9.33724	67	2.58288	7	91907096	91970972	-	2075	ZDHHC21
ENSBGRG00000000703	0	0	9	0.345108	26	1.04646	75	2.7683	0	0	0	0	0	0	0	0	0	0	7	9384905	9504024	-	2551	ADRA1A
ENSBGRG00000000704	0	0	0	0	0	0	10	0.647141	0	0	0	0	0	0	0	0	0	0	5	79887899	79891831	+	1455	-
ENSBGRG00000000705	1561	35.424	1569	30.0407	1568	31.5115	1385	25.5256	1541	36.6574	1474	24.5008	1152	24.6616	1280	30.918	705	11.0383	1	137848252	137969665	+	5109	XRN1
ENSBGRG00000000706	0	0	0	0	0	0	0	0	0	0	0	0	0	0	0	0	0	0	3	131354260	131366190	+	1488	AGXT
ENSBGRG00000000707	0	0	0	0	0	0	7	0.889492	15	2.46019	0	0	0	0	0	0	0	0	1	83247487	83259425	-	741	-
ENSBGRG00000000709	4	0.169626	0	0	0	0	0	0	0	0	0	0	0	0	0	0	0	0	3	63808967	63839088	+	2734	MCOLN3
ENSBGRG00000000711	1903	102.05	1848	83.6121	2153	102.246	944	41.1129	1518	85.3319	1419	55.7372	1363	68.9515	1410	80.4823	1317	48.7279	5	82736959	82769732	-	2162	METAP2
ENSBGRG00000000712	973	41.1111	1145	40.8173	1119	41.8702	674	23.128	684	30.2947	943	29.1841	677	26.9841	1031	46.3673	345	10.0573	2	81650336	81681431	+	2744	CCNT2
ENSBGRG00000000713	330	24.7157	463	29.2572	343	22.7501	515	31.3255	328	25.7512	403	22.1082	294	20.7721	452	36.0333	203	10.4899	7	74045045	74093685	+	1548	PTAR1
ENSBGRG00000000714	973	81.7455	1160	82.2246	956	71.1276	1053	71.8474	745	65.6104	1266	77.9064	682	54.0517	488	43.6393	1242	71.993	1	90324178	90332384	-	1380	AP2M1
ENSBGRG00000000715	20	0.530735	43	0.962741	33	0.775517	26	0.560342	0	0	49	0.952429	67	1.67725	0	0	97	1.77598	3	107036387	107269360	+	4369	TRABD2B
ENSBGRG00000000717	0	0	0	0	0	0	0	0	0	0	0	0	0	0	0	0	0	0	1	41201785	41202222	-	438	-
ENSBGRG00000000718	30	2.06788	130	7.56032	8	0.488341	0	0	15	1.08383	20	1.00977	0	0	0	0	0	0	1	83260427	83339216	-	1682	-
ENSBGRG00000000719	23	3.81488	15	2.09912	26	3.81905	34	4.57998	19	3.30348	168	20.4104	67	10.4834	0	0	158	18.0812	8	18832325	18835052	-	699	ALKBH7
ENSBGRG00000000721	14	0.568927	28	0.960018	31	1.11563	29	0.957102	33	1.40575	34	1.01203	22	0.843383	0	0	14	0.392531	4	65146108	65353054	-	2853	AOAH
ENSBGRG00000000723	435	16.1233	676	21.1399	374	12.2762	535	16.1046	354	13.7541	575	15.6106	487	17.0281	173	6.82522	719	18.387	5	4678141	4737283	-	3128	DUSP16
ENSBGRG00000000724	142	8.18665	110	5.35061	165	8.42425	305	14.2807	230	13.8999	226	9.54365	248	13.4879	231	14.1755	1184	47.0964	2	32849807	32857819	+	2011	PRKAG3
ENSBGRG00000000725	103	3.19811	93	2.43631	62	1.70481	66	1.6643	122	3.97083	58	1.31908	134	3.92495	0	0	20	0.428453	4	96147257	96217625	-	3734	-
ENSBGRG00000000726	112	7.26647	106	5.80236	91	5.22849	76	4.00453	29	1.97228	208	9.88456	66	4.03946	92	6.35331	158	7.07262	3	115971389	115986688	-	1787	PPIE
ENSBGRG00000000727	4212	62.1767	3044	37.912	2759	36.0678	2337	28.0175	2440	37.7567	2384	25.7771	3445	47.9736	2513	39.4856	2166	22.0605	3	99129785	99294635	+	7854	USP24
ENSBGRG00000000728	78	5.29155	123	7.04022	146	8.77142	60	3.30576	119	8.46253	58	2.88207	42	2.68789	38	2.74397	1	0.0468064	1	41245683	41310952	+	1709	NSUN3
ENSBGRG00000000729	0	0	0	0	0	0	0	0	0	0	0	0	0	0	0	0	0	0	3	131373807	131380897	-	1326	MAB21L4
ENSBGRG00000000730	191	10.8127	224	10.6989	246	12.3329	314	14.4365	297	17.6247	231	9.57856	172	9.18549	255	15.3655	269	10.5068	5	116915993	116940765	-	2048	ATP6V1E1
ENSBGRG00000000732	0	0	0	0	0	0	0	0	0	0	0	0	0	0	0	0	0	0	5	79906563	79910680	+	513	-
ENSBGRG00000000733	307	11.0196	220	6.66259	269	8.55085	227	6.61737	177	6.65987	357	9.38608	190	6.43361	434	16.5815	493	12.2093	2	55838665	56175051	+	3230	ANKRD44
ENSBGRG00000000734	0	0	0	0	0	0	0	0	0	0	0	0	0	0	0	0	57	1.80935	3	107651683	107654202	-	2520	FOXD2
ENSBGRG00000000735	5	0.500601	10	0.844723	0	0	17	1.3823	0	0	0	0	0	0	0	0	19	1.31248	8	21846509	21847666	-	1158	S1PR4
ENSBGRG00000000736	0	0	0	0	0	0	0	0	0	0	0	0	0	0	0	0	0	0	7	9784487	9796546	-	2563	STMN4
ENSBGRG00000000737	0	0	0	0	0	0	0	0	0	0	0	0	0	0	0	0	0	0	3	131404670	131453392	+	4164	-
ENSBGRG00000000739	0	0	0	0	0	0	0	0	14	1.68295	0	0	0	0	0	0	0	0	6	55241713	55242723	-	1011	-
ENSBGRG00000000740	0	0	0	0	0	0	0	0	0	0	0	0	0	0	8	0.791066	0	0	1	41764045	41765292	-	1248	-
ENSBGRG00000000741	4	0.340247	2	0.143535	76	5.72502	26	1.79614	29	2.58582	13	0.809964	15	1.20365	59	5.34187	22	1.29114	5	4824786	4854383	+	1363	CREBL2
ENSBGRG00000000742	0	0	0	0	0	0	6	0.229376	0	0	0	0	0	0	0	0	0	0	8	80152886	80216539	+	2463	GABRA1
ENSBGRG00000000743	318	28.492	303	22.9051	277	21.9788	312	22.703	277	26.016	80	5.25018	153	12.9319	155	14.782	46	2.84362	1	61966094	61986266	+	1294	SLC35A5
ENSBGRG00000000744	0	0	0	0	0	0	6	0.832039	0	0	0	0	0	0	0	0	0	0	4	17581184	17589874	-	679	RAB19
ENSBGRG00000000745	0	0	0	0	0	0	0	0	0	0	0	0	0	0	0	0	0	0	5	79919585	79926127	-	1503	-
ENSBGRG00000000748	1	0.0857538	4	0.289405	10	0.759421	3	0.208933	60	5.39349	0	0	15	1.21344	0	0	19	1.12415	8	21863917	21889605	-	1352	GNA15
ENSBGRG00000000750	0	0	0	0	0	0	0	0	0	0	0	0	0	0	0	0	0	0	2	5031508	5031862	+	177	-
ENSBGRG00000000751	27	2.30852	25	1.80345	22	1.6658	6	0.416633	0	0	16	1.00203	34	2.74235	45	4.09534	21	1.23882	1	44023621	44024976	+	1356	-
ENSBGRG00000000753	154	21.8005	107	12.7798	96	12.035	255	29.3169	164	24.3363	565	58.5845	152	20.2985	127	19.1363	437	42.682	8	18839284	18844297	-	819	CLPP
ENSBGRG00000000754	0	0	0	0	0	0	13	0.976131	9	0.872249	0	0	0	0	26	2.55866	0	0	5	4869140	4870393	-	1254	GPR19
ENSBGRG00000000755	6	0.360433	12	0.608201	6	0.319193	16	0.780593	25	1.57427	0	0	30	1.70007	59	3.77252	41	1.69932	3	63844269	63913744	+	1930	MCOLN2
ENSBGRG00000000756	226	16.1145	128	7.70039	163	10.2926	221	12.7978	138	10.3146	207	10.8111	64	4.3049	104	7.89314	242	11.9054	3	8990446	9014066	-	1626	-
ENSBGRG00000000757	0	0	0	0	0	0	0	0	0	0	0	0	0	0	0	0	0	0	1	83474428	83497624	+	995	TMEM207
ENSBGRG00000000758	608	18.2761	522	13.2387	710	18.9003	520	12.6945	628	19.7882	530	11.6693	387	10.974	429	13.726	375	7.77731	4	96292632	96387771	+	3857	FAM126A
ENSBGRG00000000760	0	0	0	0	0	0	0	0	0	0	0	0	0	0	0	0	0	0	1	44051383	45144482	+	3753	EPHA6
ENSBGRG00000000761	27	3.86464	0	0	0	0	0	0	0	0	0	0	23	3.10561	0	0	0	0	7	92002705	92005457	-	810	CER1
ENSBGRG00000000763	0	0	14	0.381467	0	0	7	0.183597	15	0.507799	12	0.283861	0	0	0	0	0	0	6	96786635	97235012	-	3590	UNC5C
ENSBGRG00000000764	446	26.436	556	27.8054	490	25.7209	568	27.3427	348	21.6225	634	27.5257	343	19.1791	303	19.1166	848	34.6797	5	4927990	4932455	+	1956	CDKN1B
ENSBGRG00000000765	0	0	0	0	0	0	0	0	0	0	0	0	0	0	12	1.66017	0	0	8	18871587	18896407	+	892	ACER1
ENSBGRG00000000766	111	5.18503	91	3.58643	80	3.30939	133	5.04559	135	6.61039	211	7.21937	95	4.18625	197	9.79493	178	5.73675	7	9837517	9854377	-	2482	TRIM35
ENSBGRG00000000767	0	0	9	1.08021	11	1.38578	0	0	0	0	0	0	0	0	0	0	0	0	5	39764346	39771510	+	815	SYCP3
ENSBGRG00000000768	54	2.37779	159	5.90703	66	2.57367	23	0.822506	72	3.32336	46	1.48363	61	2.53386	93	4.35882	66	2.00512	3	107713468	107753546	-	2633	CMPK1
ENSBGRG00000000769	225	12.5415	289	13.5912	140	6.91073	220	9.95913	148	8.64756	380	15.5145	417	21.9269	257	15.2478	382	14.6909	8	21901837	21919262	-	2080	GNA11
ENSBGRG00000000770	532	10.3126	477	7.80131	610	10.4717	685	10.784	482	9.79419	826	11.728	632	11.5571	519	10.7085	978	13.0802	2	5401533	5544946	-	5981	ECE1
ENSBGRG00000000771	1969	23.8741	2057	21.043	2078	22.3129	1166	11.4819	1712	21.7596	1256	11.1547	1475	16.8712	2027	26.1603	938	7.84697	6	55333430	55552530	+	9562	FRYL
ENSBGRG00000000772	0	0	258	11.1129	131	5.92261	0	0	0	0	0	0	0	0	0	0	2044	71.9965	8	5727396	5738687	-	2271	COMP
ENSBGRG00000000773	542	12.4261	688	13.3082	478	9.70497	457	8.50913	414	9.94953	358	6.01185	542	11.7222	537	13.1044	426	6.73852	3	37951334	38048102	-	5057	WDR47
ENSBGRG00000000774	0	0	0	0	0	0	0	0	0	0	0	0	0	0	0	0	0	0	5	79935964	79942555	+	1718	-
ENSBGRG00000000775	35	4.30772	0	0	34	3.70585	17	1.69926	7	0.903114	0	0	19	2.20601	0	0	40	3.3967	2	129966464	129983240	-	942	PRKRA
ENSBGRG00000000776	74	2.37857	286	7.75609	440	12.5247	1755	45.8135	398	13.4101	748	17.6106	1289	39.085	467	15.9775	476	10.5562	1	62002733	62113777	-	3607	CCDC80
ENSBGRG00000000777	11	2.21412	9	1.52842	18	3.20855	0	0	19	4.00891	17	2.50637	0	0	9	1.92822	23	3.19413	3	116042489	116044516	+	576	HPCAL4
ENSBGRG00000000778	1055	62.855	888	44.6368	1047	55.2412	1079	52.2084	860	53.7095	1280	55.858	1147	64.4651	808	51.2396	1764	72.5109	5	116949835	116996563	+	1946	-
ENSBGRG00000000779	250	6.19466	165	3.44948	117	2.56739	196	3.94426	160	4.15587	116	2.10535	285	6.66186	55	1.4506	195	3.33372	4	17583427	17672602	+	4679	SLC37A3
ENSBGRG00000000781	9	1.40817	0	0	0	0	10	1.2707	15	2.46019	13	1.48985	0	0	0	0	15	1.61928	5	4994522	4995262	+	741	APOLD1
ENSBGRG00000000782	99	4.10514	101	3.53352	21	0.771155	191	6.43218	50	2.17334	145	4.40402	137	5.35904	42	1.85374	347	9.9275	5	76448136	76460724	+	2796	CACNB3
ENSBGRG00000000783	0	0	0	0	8	0.230857	12	0.317568	0	0	10	0.238678	0	0	0	0	48	1.07915	7	54784727	54837523	+	3558	TBC1D2
ENSBGRG00000000784	93	6.55063	48	2.85256	24	1.49707	98	5.60607	57	4.20863	156	8.04847	74	4.91706	79	5.9229	488	23.7158	2	32864088	32907980	-	1646	CYP27A1
ENSBGRG00000000785	73	3.98285	179	8.23981	93	4.49348	164	7.26686	162	9.26513	214	8.55211	123	6.33067	82	4.76203	204	7.67925	8	13134771	13140607	-	2125	DDX39A
ENSBGRG00000000786	42	1.83269	13	0.478602	12	0.463713	47	1.66559	0	0	0	0	10	0.411635	26	1.20759	162	4.87721	7	74300912	74392606	+	2657	APBA1
ENSBGRG00000000787	0	0	0	0	0	0	0	0	0	0	0	0	0	0	0	0	0	0	2	81690860	81759355	-	4512	MAP3K19
ENSBGRG00000000788	0	0	0	0	0	0	0	0	0	0	0	0	0	0	0	0	0	0	5	79951130	79959999	-	1476	-
ENSBGRG00000000789	208	11.9977	120	5.83994	114	5.82329	214	10.0249	123	7.43711	199	8.40766	247	13.4402	10	0.613961	193	7.68084	8	18914685	18992673	+	2010	MLLT1
ENSBGRG00000000790	171	18.0561	181	16.125	150	14.0265	304	26.0695	124	13.7251	426	32.9477	348	34.6642	142	15.9596	898	65.4217	3	116053661	116069006	+	1098	NT5C1A
ENSBGRG00000000792	400	6.80794	336	4.82489	176	2.65276	391	5.40461	289	5.15607	510	6.3579	513	8.23657	333	6.03263	244	2.86525	7	92026873	92193732	-	6812	FREM1
ENSBGRG00000000793	172	10.903	101	5.4017	95	5.33297	308	15.8562	51	3.38885	516	23.9582	154	9.20897	94	6.34236	309	13.5143	8	21946246	21958797	+	1829	TLE5
ENSBGRG00000000794	0	0	0	0	0	0	0	0	13	2.06527	0	0	0	0	0	0	0	0	1	83531604	83553240	-	765	CLDN16
ENSBGRG00000000795	657	56.5494	849	61.6543	924	70.431	1092	76.3338	941	84.9019	1053	66.3864	528	42.8716	786	72.0099	598	35.5125	5	39771336	39807564	-	1347	CHPT1
ENSBGRG00000000796	0	0	0	0	0	0	8	0.711305	0	0	0	0	0	0	0	0	0	0	2	129985337	129991545	+	1059	PJVK
ENSBGRG00000000797	0	0	0	0	0	0	0	0	0	0	0	0	0	0	0	0	0	0	3	63885266	63888812	-	651	-
ENSBGRG00000000798	0	0	0	0	0	0	0	0	0	0	0	0	0	0	0	0	0	0	8	80360238	80505271	+	2963	GABRG2
ENSBGRG00000000799	0	0	0	0	0	0	0	0	5	0.800615	0	0	0	0	0	0	0	0	1	62211860	62224053	-	759	-
ENSBGRG00000000800	78	4.2859	21	0.973554	20	0.973211	167	7.4524	102	5.87507	153	6.15782	15	0.777522	50	2.92432	72	2.72959	1	83663566	83682216	+	2110	CLDN1
ENSBGRG00000000802	37	4.34625	0	0	0	0	44	4.19757	16	1.97014	28	2.40912	35	3.87842	43	5.37636	88	7.13203	3	116096206	116111610	+	987	HEYL
ENSBGRG00000000803	0	0	0	0	0	0	17	1.26538	8	0.76859	0	0	0	0	0	0	0	0	3	63978628	64038160	+	1265	LPAR3
ENSBGRG00000000804	124	2.1852	156	2.31946	60	0.936377	155	2.21837	48	0.8867	167	2.15563	200	3.32486	114	2.13837	193	2.34663	7	9950702	10023938	+	6579	PTK2B
ENSBGRG00000000806	45	7.7986	0	0	95	14.58	98	13.7931	36	6.53991	9	1.14244	141	23.0514	64	11.8057	57	6.81548	2	129995002	130002493	-	669	FKBP7
ENSBGRG00000000807	135	5.69777	207	7.37114	68	2.54161	220	7.54095	207	9.15813	267	8.25412	193	7.68427	226	10.1528	296	8.61947	5	5021151	5034141	+	2747	DDX47
ENSBGRG00000000808	0	0	0	0	0	0	0	0	0	0	0	0	0	0	0	0	0	0	1	44288554	44289558	-	1005	-
ENSBGRG00000000809	8	2.53419	0	0	23	6.45217	22	5.65983	0	0	0	0	9	2.68946	0	0	62	13.5506	3	9036662	9037864	-	366	-
ENSBGRG00000000811	0	0	0	0	0	0	0	0	0	0	0	0	0	0	0	0	0	0	5	79975999	79991297	+	1392	-
ENSBGRG00000000812	197	4.59743	258	5.07997	126	2.60404	127	2.40704	33	0.807286	236	4.03412	228	5.01946	103	2.55854	399	6.4245	3	131482735	131565889	+	4968	SNED1
ENSBGRG00000000813	1022	29.734	1444	35.4456	989	25.4816	3868	91.3945	841	25.6486	2422	51.6136	2167	59.475	710	21.9871	2981	59.8386	1	159041380	159063428	+	3985	COL6A1
ENSBGRG00000000814	29	2.70711	0	0	16	1.32269	0	0	0	0	0	0	18	1.58509	0	0	0	0	4	96413247	96414488	+	1242	-
ENSBGRG00000000816	1079	39.9293	1340	41.8377	1598	52.3692	876	26.3273	778	30.1797	1068	28.9487	950	33.164	1392	54.8297	548	13.9916	2	81780739	81918153	+	3133	RAB3GAP1
ENSBGRG00000000817	69	3.77171	84	3.87402	45	2.17837	77	3.41832	45	2.5785	67	2.68258	47	2.4236	0	0	28	1.056	1	83845662	84036378	+	2121	P3H2
ENSBGRG00000000819	8	0.851711	0	0	0	0	0	0	0	0	0	0	0	0	0	0	0	0	8	19003352	19004440	+	1089	-
ENSBGRG00000000820	0	0	0	0	0	0	0	0	0	0	0	0	0	0	0	0	0	0	1	44479192	44480388	-	1197	-
ENSBGRG00000000821	0	0	0	0	0	0	17	1.3623	31	3.20641	0	0	11	1.0239	61	6.40662	12	0.816942	1	62267061	62328920	-	1175	-
ENSBGRG00000000822	790	119.105	808	102.78	557	74.3683	778	95.261	460	72.6987	929	102.591	481	68.4105	683	109.605	586	60.9564	5	47505168	47508152	+	769	RAB5B
ENSBGRG00000000826	0	0	0	0	0	0	0	0	0	0	0	0	0	0	0	0	0	0	6	55557695	55561493	-	1182	ZAR1
ENSBGRG00000000827	0	0	0	0	0	0	0	0	0	0	0	0	0	0	0	0	0	0	5	124699096	124715903	+	3429	RIBC2
ENSBGRG00000000828	50	2.66527	37	1.66405	0	0	21	0.909122	12	0.670529	63	2.4598	37	1.86057	0	0	29	1.06656	5	117003370	117022467	-	2175	-
ENSBGRG00000000831	201	6.48949	270	7.35481	201	5.74698	258	6.76498	145	4.90736	179	4.23308	109	3.31982	151	5.18918	305	6.7941	2	32944762	32964058	-	3591	TTLL4
ENSBGRG00000000833	104	4.98457	86	3.47765	132	5.6027	151	5.87764	95	4.77291	30	1.05318	79	3.57187	1	0.0510154	82	2.7116	3	64180116	64238076	+	2419	SSX2IP
ENSBGRG00000000834	56	1.89288	44	1.25482	0	0	13	0.356871	13	0.460622	28	0.693238	14	0.446414	0	0	0	0	4	52614302	52690778	+	3430	STK31
ENSBGRG00000000837	0	0	29	0.652426	17	0.401438	38	0.822917	76	2.12432	0	0	31	0.779787	0	0	0	0	7	28507944	28740909	-	4348	GRIN3A
ENSBGRG00000000838	10	0.755796	0	0	0	0	17	1.04348	0	0	0	0	5	0.356491	7	0.563131	0	0	1	45164365	45201378	+	1534	ARL6
ENSBGRG00000000839	0	0	0	0	0	0	0	0	0	0	0	0	0	0	0	0	0	0	5	80003706	80011621	-	1521	KRT85
ENSBGRG00000000840	0	0	0	0	0	0	0	0	0	0	1	0.0592201	13	0.991512	0	0	0	0	7	92270233	92271666	-	1434	-
ENSBGRG00000000842	4	1.01036	0	0	0	0	0	0	0	0	0	0	0	0	0	0	0	0	4	96442943	96444128	-	459	-
ENSBGRG00000000843	190	22.9463	143	14.5709	113	12.0856	151	14.8104	141	17.8502	143	12.6498	220	25.0643	88	11.3122	166	13.832	3	54518364	54538389	-	960	DR1
ENSBGRG00000000844	0	0	0	0	0	0	0	0	0	0	0	0	0	0	0	0	0	0	8	19023709	19060714	-	3466	ACSBG2
ENSBGRG00000000845	1217	70.5843	2767	135.4	2026	104.061	2656	125.106	2021	122.871	2841	120.692	1847	101.055	1701	105.009	4516	180.713	3	116156648	116170196	+	1999	-
ENSBGRG00000000846	417	19.5973	485	19.2307	115	4.78617	289	11.0304	173	8.5226	312	10.74	380	16.8468	283	14.1564	294	9.53292	5	110918612	110926987	+	2467	NOP2
ENSBGRG00000000847	37	0.896874	48	0.981666	23	0.493727	46	0.905565	11	0.279504	0	0	59	1.34914	13	0.335413	64	1.07035	3	107765529	107822986	+	4783	STIL
ENSBGRG00000000848	165	7.45807	209	7.97043	100	4.00287	132	4.84561	173	8.19698	62	2.05269	137	5.84167	277	13.3269	137	4.27249	2	130007519	130041719	+	2565	PLEKHA3
ENSBGRG00000000849	4039	246.592	5544	285.576	3771	203.888	4288	212.614	3414	218.491	5473	244.748	5057	291.254	4056	263.579	7534	317.357	2	144195346	144256301	-	1899	BIN1
ENSBGRG00000000850	154	7.42396	54	2.19635	97	4.1411	81	3.17126	63	3.18362	126	4.44912	146	6.6396	2	0.102625	131	4.35716	5	47515387	47518223	+	2405	SUOX
ENSBGRG00000000851	1	0.065171	0	0	0	0	0	0	0	0	0	0	0	0	6	0.41621	0	0	3	54555839	54557617	+	1779	-
ENSBGRG00000000852	0	0	0	0	0	0	0	0	0	0	0	0	0	0	0	0	0	0	4	96455193	96456224	-	1032	-
ENSBGRG00000000853	432	44.8797	429	37.6024	224	20.6083	536	45.2233	209	22.7603	796	60.5713	433	42.4353	157	17.3609	663	47.5223	3	9039799	9042898	-	1116	USF1
ENSBGRG00000000855	72	4.199	47	2.31262	38	1.96258	54	2.55764	131	8.00848	84	3.58824	58	3.19092	100	6.20756	61	2.45449	7	92387503	92555104	-	1988	TTC39B
ENSBGRG00000000857	64	2.16962	103	2.94601	148	4.44319	99	2.72566	73	2.59413	190	4.71787	91	2.91018	31	1.11859	147	3.43826	8	21964742	21999141	+	3420	TLE2
ENSBGRG00000000858	70	26.9626	38	12.3492	49	16.7143	46	14.3898	47	18.977	51	14.3887	0	0	58	23.7793	0	0	4	96489513	96496732	+	301	TOMM7
ENSBGRG00000000859	34	10.1075	25	6.27045	98	25.8001	52	12.5545	38	11.8417	16	3.48396	8	2.24352	14	4.42997	15	3.07662	1	45166248	45167490	+	390	-
ENSBGRG00000000860	424	16.2722	238	7.70636	50	1.69933	361	11.2517	115	4.62639	412	11.5815	317	11.4766	37	1.51143	741	19.6207	5	117030389	117055473	-	3021	-
ENSBGRG00000000861	73	1.91961	83	1.84145	133	3.09721	43	0.918312	89	2.45327	45	0.866744	104	2.57987	121	3.38674	66	1.19743	3	54614437	54730177	-	4409	CCDC18
ENSBGRG00000000862	340	16.343	163	6.61049	144	6.12977	269	10.5012	269	13.5541	433	15.2451	475	21.5387	167	8.54429	337	11.1764	1	90337559	90353976	-	2412	DVL3
ENSBGRG00000000863	1085	36.9222	1278	36.6929	1027	30.9498	5431	150.096	874	31.177	3998	99.6527	2572	82.5663	552	19.9942	4725	110.937	1	159211124	159229552	+	3407	COL6A2
ENSBGRG00000000864	0	0	0	0	0	0	0	0	0	0	0	0	0	0	0	0	0	0	3	99325078	99336488	-	2490	BSND
ENSBGRG00000000865	0	0	0	0	0	0	0	0	0	0	0	0	0	0	0	0	0	0	5	80023195	80030957	-	1872	KRT84
ENSBGRG00000000866	237	15.385	155	8.48933	152	8.73819	224	11.8094	103	7.00892	233	11.0788	163	9.98183	234	16.1686	187	8.37544	1	62353778	62377411	+	1786	GTPBP8
ENSBGRG00000000867	79	2.42885	8	0.207518	12	0.326726	159	3.97011	29	0.934624	61	1.3737	90	2.6103	29	0.949027	247	5.23948	5	47531463	47545412	+	3771	IKZF4
ENSBGRG00000000868	7	0.619996	0	0	0	0	0	0	0	0	0	0	0	0	0	0	0	0	4	96564767	96569792	-	1309	IL6
ENSBGRG00000000869	0	0	8	1.23626	0	0	0	0	0	0	0	0	14	2.41896	0	0	0	0	3	99345463	99361136	-	633	TMEM61
ENSBGRG00000000870	487	16.5046	537	15.3548	276	8.28353	633	17.4226	240	8.52616	571	14.1743	368	11.7652	382	13.7799	614	14.357	5	76462937	76477785	-	3421	DDX23
ENSBGRG00000000872	57	3.85113	51	2.90721	38	2.27366	105	5.76148	2	0.141647	67	3.3157	124	7.9033	19	1.36639	203	9.46295	5	110927619	110944043	+	1716	IFFO1
ENSBGRG00000000873	13	0.814708	48	2.53801	5	0.277497	35	1.78139	30	1.97081	48	2.20337	60	3.54718	0	0	53	2.29167	3	107843167	107856434	+	1850	TAL1
ENSBGRG00000000874	1830	20.7764	3217	30.8151	2123	21.3451	1835	16.9195	1762	20.9696	2217	18.4363	2340	25.0616	2537	30.6582	732	5.73387	1	45225139	45364143	+	10212	CRYBG3
ENSBGRG00000000875	55	1.23292	99	1.8724	11	0.21837	78	1.42003	33	0.775445	46	0.755297	60	1.26881	21	0.501069	59	0.912517	2	5666832	5709093	+	5172	ALPL
ENSBGRG00000000876	0	0	0	0	0	0	0	0	0	0	0	0	0	0	0	0	0	0	6	97564327	97565493	+	1167	PDHA2
ENSBGRG00000000877	0	0	0	0	0	0	0	0	0	0	0	0	0	0	0	0	0	0	5	5094849	5095981	+	405	-
ENSBGRG00000000879	0	0	0	0	0	0	0	0	0	0	0	0	0	0	0	0	0	0	8	81325609	81327882	+	792	-
ENSBGRG00000000880	1093	35.3971	834	22.788	479	13.7376	1089	28.6422	888	30.1457	965	22.8909	1106	33.789	743	25.612	1337	29.8742	5	117068397	117122391	-	3580	-
ENSBGRG00000000881	74	2.60696	79	2.34813	25	0.779958	21	0.600833	20	0.73858	164	4.23189	58	1.92754	38	1.42493	119	2.89246	3	9047257	9066456	-	3291	ARHGAP30
ENSBGRG00000000882	90	3.87325	148	5.37387	217	8.2703	186	6.50096	105	4.73682	52	1.63917	133	5.39955	133	6.09244	72	2.13788	2	56236656	56314065	+	2694	PGAP1
ENSBGRG00000000884	0	0	0	0	0	0	0	0	0	0	0	0	0	0	0	0	0	0	3	107883974	107890153	+	1320	PDZK1IP1
ENSBGRG00000000885	938	31.2593	868	24.4055	477	14.0774	778	21.0566	357	12.4712	1107	27.0216	987	31.0289	594	21.0702	1854	42.6288	8	5803781	5837644	+	3479	UPF1
ENSBGRG00000000886	175	6.36229	39	1.19628	27	0.869298	125	3.69077	63	2.40094	224	5.96502	133	4.56143	0	0	119	2.98497	3	99406318	99443062	+	3189	DHCR24
ENSBGRG00000000887	0	0	0	0	0	0	0	0	0	0	0	0	0	0	0	0	0	0	3	64304182	64318955	+	1768	CTBS
ENSBGRG00000000889	793	25.3068	222	5.97738	369	10.4285	524	13.5809	638	21.3428	596	13.9315	494	14.8719	401	13.6212	316	6.95776	1	84123060	84419710	-	3633	TP63
ENSBGRG00000000890	0	0	0	0	0	0	0	0	0	0	0	0	0	0	0	0	0	0	3	54661390	54662841	+	1452	-
ENSBGRG00000000891	0	0	0	0	0	0	0	0	0	0	0	0	0	0	0	0	0	0	6	98326363	98327330	+	843	-
ENSBGRG00000000892	0	0	0	0	0	0	0	0	0	0	0	0	0	0	0	0	0	0	8	81630343	81631704	+	1362	-
ENSBGRG00000000893	0	0	0	0	0	0	0	0	0	0	0	0	0	0	0	0	0	0	5	5127608	5134680	-	2066	GPRC5D
ENSBGRG00000000894	252	16.9078	215	12.1708	162	9.62566	272	14.8213	156	10.9718	166	8.15798	123	7.78512	157	11.2123	142	6.57343	7	92653146	92693535	+	1728	SNAPC3
ENSBGRG00000000895	40	2.15701	82	3.73077	97	4.63226	93	4.07293	60	3.39163	81	3.19937	89	4.52747	86	4.93625	71	2.6416	4	96932155	97004727	+	2150	RAPGEF5
ENSBGRG00000000896	80390	7013.05	84901	6249	107817	8329.55	91775	6502.22	82952	7585.73	77057	4923.86	90959	7485.56	74056	6876.58	68354	4114.21	2	130101931	130104290	-	1329	-
ENSBGRG00000000897	28	0.79043	113	2.69139	59	1.47498	68	1.559	27	0.798977	114	2.35721	17	0.452718	103	3.09492	158	3.07737	3	20965815	20974443	+	4107	ECM1
ENSBGRG00000000898	267	23.275	236	17.3573	331	25.5526	277	19.6106	366	33.4445	285	18.1975	345	28.3708	325	30.1557	61	3.66882	3	54732959	54751341	+	1330	TMED5
ENSBGRG00000000899	0	0	0	0	0	0	0	0	0	0	16	0.71513	0	0	0	0	0	0	8	13195701	13199068	-	1900	PTGER1
ENSBGRG00000000900	8150	388.37	7293	293.216	7066	298.188	7204	278.801	6386	318.994	9664	337.313	9657	434.114	5802	294.288	4113	135.227	8	81812212	81819585	+	2433	CCNG1
ENSBGRG00000000901	0	0	0	0	0	0	0	0	0	0	0	0	0	0	0	0	0	0	7	28746672	28748010	-	1339	-
ENSBGRG00000000902	477	17.7538	727	22.8297	740	24.3912	2840	85.8465	314	12.2509	657	17.9112	718	25.2098	108	4.27861	1284	32.9727	5	124782506	124884621	+	3115	FBLN1
ENSBGRG00000000903	93	11.9406	49	5.30801	53	6.02625	151	15.7453	78	10.4979	213	20.0313	128	15.5034	31	4.23654	161	14.2622	5	117254606	117262737	+	903	PEX26
ENSBGRG00000000904	0	0	0	0	0	0	0	0	0	0	17	0.941727	0	0	0	0	0	0	3	9069015	9084839	-	1533	NECTIN4
ENSBGRG00000000905	0	0	0	0	0	0	0	0	0	0	0	0	0	0	0	0	0	0	2	81920226	81921266	-	1041	-
ENSBGRG00000000906	0	0	0	0	0	0	0	0	0	0	0	0	0	0	0	0	0	0	3	107912196	107966157	-	2598	CYP4X1
ENSBGRG00000000909	0	0	0	0	0	0	20	0.510485	14	0.461227	6	0.138121	0	0	0	0	0	0	8	48539578	49013522	-	3689	FSTL4
ENSBGRG00000000910	949	25.0515	893	19.889	870	20.3384	826	17.7084	773	21.3901	873	16.8799	887	22.0884	641	18.0108	857	15.6087	4	17817460	17895799	+	4392	KDM7A
ENSBGRG00000000911	0	0	0	0	0	0	0	0	0	0	0	0	0	0	0	0	0	0	5	80040380	80052511	-	1545	KRT82
ENSBGRG00000000912	0	0	0	0	0	0	0	0	0	0	0	0	0	0	0	0	0	0	7	29912606	29916892	+	1011	-
ENSBGRG00000000913	0	0	0	0	0	0	0	0	0	0	0	0	0	0	0	0	0	0	6	99541706	99971483	-	2990	STPG2
ENSBGRG00000000914	1402	467.088	2795	785.644	1376	405.974	1937	524.098	1160	405.111	2349	573.221	1318	414.229	1029	364.899	1611	370.309	5	47558024	47560166	+	348	RPS26
ENSBGRG00000000915	43	4.59906	29	2.61693	6	0.568305	0	0	13	1.4575	148	11.5945	94	9.48424	27	3.07377	27	1.99243	8	13204544	13209250	-	1084	GIPC1
ENSBGRG00000000916	9	1.46552	32	4.39636	31	4.47034	41	5.42208	13	2.21901	7	0.834904	9	1.3825	29	5.02638	25	2.80872	5	5157529	5202595	-	712	-
ENSBGRG00000000917	4	0.333159	0	0	4	0.295039	0	0	0	0	0	0	0	0	0	0	0	0	3	64321654	64378728	-	1392	SPATA1
ENSBGRG00000000918	47	0.966674	61	1.05853	39	0.710356	69	1.15256	0	0	100	1.5065	27	0.523865	73	1.59813	81	1.14944	2	32997417	33025959	-	5637	STK36
ENSBGRG00000000919	114	6.50446	117	5.63229	75	3.78963	114	5.28255	52	3.1101	148	6.18524	54	2.90652	58	3.52242	72	2.83437	1	62371888	62387824	-	2032	NEPRO
ENSBGRG00000000920	178	3.09635	223	3.27286	73	1.12456	171	2.41578	200	3.64691	150	1.91121	87	1.42765	153	2.83288	230	2.76042	2	81927085	82252657	-	6665	ZRANB3
ENSBGRG00000000921	555	17.8789	638	17.3405	252	7.18916	497	13.0028	474	16.0063	621	14.6531	488	14.83	346	11.864	633	14.0692	1	90362131	90373575	-	3599	EIF2B5
ENSBGRG00000000922	158	7.38347	88	3.4696	161	6.66282	235	8.91873	93	4.55566	336	11.5009	204	8.99305	176	8.75433	380	12.2519	4	97113569	97249143	+	2481	CDCA7L
ENSBGRG00000000923	28	1.11633	88	2.96013	19	0.670839	103	3.33507	13	0.543306	93	2.71586	97	3.64822	18	0.763862	26	0.715199	8	19101827	19210934	+	2908	RFX2
ENSBGRG00000000925	704	27.2707	652	21.309	466	15.986	308	9.6896	675	27.4089	448	12.7113	281	10.2684	566	23.3371	210	5.61255	7	92698966	92743718	-	2993	PSIP1
ENSBGRG00000000926	1230	432.137	19531	5789.4	28386	8831.81	12801	3652.52	25884	9532.63	480	123.522	5610	1859.31	20735	7754.02	6466	1567.36	2	130249026	130249583	-	330	-
ENSBGRG00000000928	0	0	0	0	0	0	3	0.236383	0	0	0	0	15	1.37286	0	0	0	0	3	9098363	9101457	+	1195	KLHDC9
ENSBGRG00000000929	0	0	0	0	0	0	0	0	0	0	0	0	0	0	0	0	0	0	5	82855112	82864535	+	1800	-
ENSBGRG00000000931	0	0	0	0	0	0	0	0	0	0	0	0	0	0	0	0	0	0	5	80059366	80073970	-	1464	-
ENSBGRG00000000932	849	45.4443	885	39.9676	443	20.9993	1305	56.7302	500	28.0548	1862	73.0028	763	38.5274	428	24.385	2512	92.7703	5	117279154	117301177	+	2166	TUBA8
ENSBGRG00000000933	21	0.765877	0	0	0	0	65	1.92524	0	0	22	0.587693	50	1.72022	66	2.56207	25	0.629067	5	76480751	76489245	-	3179	RND1
ENSBGRG00000000934	337	10.9108	185	5.05348	187	5.36163	706	18.5636	193	6.55011	1013	24.0228	684	20.8908	153	5.27259	1125	25.1302	3	21009064	21022286	+	3581	ADAMTSL4
ENSBGRG00000000935	0	0	0	0	0	0	0	0	0	0	0	0	0	0	0	0	0	0	6	55562921	55568747	-	1347	SLC10A4
ENSBGRG00000000936	107983	7399.21	96092	5555.33	100539	6100.89	100142	5572.86	87863	6311.04	110066	5524.22	102590	6631.45	92933	6778.08	124683	5894.6	2	130297690	130303292	-	1692	-
ENSBGRG00000000937	98	2.23618	143	2.75302	62	1.25286	147	2.72414	108	2.58327	127	2.12262	347	7.46937	40	0.971511	228	3.5895	5	5252302	5297653	+	5081	FAM234B
ENSBGRG00000000938	0	0	0	0	0	0	0	0	0	0	0	0	0	0	0	0	0	0	8	19164757	19165983	-	1227	-
ENSBGRG00000000941	177	26.7204	137	17.4495	175	23.3957	220	26.9726	177	28.0096	218	24.1054	121	17.2317	185	29.7268	104	10.8323	3	9100253	9113555	-	768	-
ENSBGRG00000000943	108	11.6154	95	8.62041	106	10.0959	49	4.27996	69	7.77903	19	1.49676	96	9.73994	200	22.8954	102	7.56884	8	81828047	81834239	-	1078	NUDCD2
ENSBGRG00000000944	655	24.5443	724	22.8898	314	10.42	385	11.7166	159	6.24557	818	22.4518	473	16.7203	66	2.63245	463	11.9704	8	13232653	13240002	-	3094	-
ENSBGRG00000000945	1239	58.3226	1504	59.7319	1394	58.1109	1128	43.1228	985	48.6035	1020	35.1685	1271	56.4397	849	42.5383	598	19.4216	5	82947750	83026742	-	2463	VEZT
ENSBGRG00000000946	0	0	0	0	0	0	0	0	0	0	0	0	0	0	0	0	0	0	3	107944491	107946432	-	1116	-
ENSBGRG00000000947	137	3.62972	15	0.335303	52	1.22007	111	2.3884	47	1.30532	49	0.950905	52	1.29966	2	0.0564014	110	2.01077	5	47606697	47630878	+	4376	ERBB3
ENSBGRG00000000948	0	0	0	0	0	0	0	0	0	0	0	0	0	0	0	0	0	0	5	76522565	76534236	+	1533	CCDC65
ENSBGRG00000000949	0	0	0	0	0	0	0	0	0	0	0	0	0	0	0	0	0	0	1	159240967	159263540	-	2785	FTCD
ENSBGRG00000000950	69	2.09474	119	3.04804	117	3.14554	25	0.616386	184	5.85549	87	1.93459	28	0.801885	119	3.84534	25	0.523646	7	31132640	31188427	+	3819	SMC2
ENSBGRG00000000952	1622	102.93	2045	109.491	2332	131.054	1702	87.7169	1604	106.699	1141	53.0354	1321	79.0803	1560	105.371	1322	57.8816	6	55623859	55696965	-	1827	SLAIN2
ENSBGRG00000000954	639	32.1829	780	33.1446	578	25.7799	997	40.7804	774	40.8631	704	25.9708	788	37.439	460	24.6598	973	33.8108	7	74440789	74522227	-	2302	FAM189A2
ENSBGRG00000000955	90	4.48604	167	7.02312	146	6.4447	182	7.36756	118	6.16549	99	3.61446	128	6.01872	146	7.74605	188	6.46541	1	45361838	45400991	-	2326	RIOX2
ENSBGRG00000000956	0	0	0	0	0	0	0	0	0	0	0	0	0	0	0	0	0	0	3	99451957	99482377	-	1227	LEXM
ENSBGRG00000000957	409	11.8134	306	7.45705	410	10.4874	311	7.29533	364	11.021	323	6.8335	240	6.5394	198	6.0873	242	4.82265	3	54775328	54856147	-	4014	MTF2
ENSBGRG00000000959	2	0.280046	34	4.01672	7	0.868015	0	0	23	3.37593	25	2.56406	30	3.96273	18	2.68274	0	0	1	62452480	62453517	-	828	-
ENSBGRG00000000960	129	14.244	97	9.03661	34	3.32467	44	3.94571	41	4.74559	119	9.62445	40	4.16653	28	3.29083	224	17.065	3	131569065	131575190	-	1050	MTERF4
ENSBGRG00000000961	0	0	0	0	0	0	0	0	0	0	0	0	0	0	0	0	0	0	5	80074370	80089366	-	3354	KRT75
ENSBGRG00000000962	1282	80.8673	1765	93.9339	1735	96.92	1274	65.2658	954	63.0809	877	40.5203	970	57.7205	1284	86.2098	718	31.2483	3	21035651	21038385	-	1838	MCL1
ENSBGRG00000000963	79	44.2473	150	70.8833	82	40.6727	142	64.5922	117	68.6927	327	134.152	158	83.4816	29	17.2888	449	173.51	3	64384153	64390313	+	207	-
ENSBGRG00000000964	0	0	14	0.389828	0	0	0	0	9	0.311358	18	0.435124	0	0	0	0	30	0.68311	2	5730800	5787869	-	3513	RAP1GAP
ENSBGRG00000000965	31	4.9302	0	0	52	7.32378	26	3.35821	19	3.16753	125	14.5613	33	4.95097	0	0	52	5.70589	3	9113714	9121285	+	729	NIT1
ENSBGRG00000000966	25	14.4203	0	0	26	13.2812	11	5.15298	0	0	0	0	0	0	0	0	25	9.94928	8	13241661	13242974	-	201	-
ENSBGRG00000000967	506374	3510.65	453164	2650.72	559610	3435.82	494396	2783.7	426238	3097.66	499959	2538.86	476966	3119.44	417686	3082.29	543396	2599.26	2	130333372	130398855	-	16723	-
ENSBGRG00000000968	0	0	0	0	0	0	0	0	0	0	0	0	0	0	0	0	0	0	7	10025113	10041838	-	2417	CHRNA2
ENSBGRG00000000969	296	16.2722	101	4.68455	98	4.77099	255	11.3848	71	4.09145	240	9.66391	264	13.6909	276	16.1499	348	13.1993	4	17909141	17957225	+	2109	PARP12
ENSBGRG00000000970	104	7.61217	34	2.09965	25	1.62048	88	5.23106	81	6.21477	10	0.536121	8	0.552381	39	3.03841	35	1.7675	1	138011188	138099742	+	1584	GK5
ENSBGRG00000000971	93	9.92849	25	2.25182	29	2.74175	48	4.16173	39	4.36446	311	24.3192	65	6.54617	67	7.61346	425	31.3045	5	117345678	117348896	+	1086	CDC42EP1
ENSBGRG00000000972	138	3.58655	116	2.5436	76	1.7492	118	2.49065	67	1.82532	143	2.72221	169	4.14341	102	2.82166	111	1.99039	1	62620554	62705481	+	4461	BOC
ENSBGRG00000000973	332	8.94119	348	7.90732	204	4.86537	207	4.52751	309	8.7233	316	6.2335	366	9.29848	439	12.5843	264	4.90545	5	83027238	83134906	+	4305	FGD6
ENSBGRG00000000974	0	0	0	0	0	0	0	0	0	0	0	0	0	0	0	0	0	0	8	49075822	49076853	-	1032	-
ENSBGRG00000000975	0	0	0	0	0	0	0	0	0	0	0	0	0	0	0	0	0	0	1	90392883	90400134	-	1468	-
ENSBGRG00000000977	135	2.8777	39	0.701405	38	0.717338	153	2.64871	98	2.18979	317	4.94947	92	1.85	77	1.74706	575	8.45661	8	5840886	5867299	-	5439	CERS1
ENSBGRG00000000978	292	16.4982	177	8.4376	263	13.1594	243	11.1504	183	10.8385	347	14.3605	171	9.11428	133	7.99855	512	19.9591	8	19233268	19290876	+	2052	RANBP3
ENSBGRG00000000979	156	9.83497	248	13.1915	112	6.2531	258	13.2099	127	8.393	374	17.2706	217	12.9057	116	7.78419	282	12.2663	5	76531903	76549420	-	1839	-
ENSBGRG00000000981	0	0	0	0	0	0	0	0	0	0	0	0	0	0	0	0	0	0	8	49447293	49448675	+	1383	-
ENSBGRG00000000982	552	15.4735	283	6.69313	608	15.0932	505	11.4967	550	16.1613	526	10.8	435	11.503	608	18.141	403	7.79421	2	82326776	82430252	+	4136	R3HDM1
ENSBGRG00000000983	328	30.205	611	47.4721	381	31.0712	233	17.4258	380	36.682	164	11.0621	257	22.326	438	42.9324	199	12.6437	3	64394882	64411540	-	1259	RPF1
ENSBGRG00000000984	72	3.2305	77	2.91488	22	0.874157	16	0.583028	29	1.36396	51	1.67608	97	4.10566	93	4.44148	0	0	6	55759538	55941390	+	2584	TEC
ENSBGRG00000000985	0	0	0	0	0	0	0	0	0	0	0	0	0	0	0	0	0	0	5	117350119	117358696	-	393	LGALS2
ENSBGRG00000000987	0	0	0	0	0	0	0	0	0	0	0	0	0	0	0	0	0	0	3	99490803	99517245	+	1798	TTC22
ENSBGRG00000000988	0	0	0	0	0	0	0	0	0	0	0	0	0	0	0	0	0	0	6	99681156	99682908	+	963	-
ENSBGRG00000000989	143	17.8849	283	29.8627	190	21.0442	208	21.1274	124	16.2569	141	12.9169	102	12.0344	95	12.6468	184	15.8776	8	49453216	49468148	-	927	C5orf15
ENSBGRG00000000991	0	0	0	0	0	0	0	0	0	0	0	0	0	0	0	0	0	0	5	80124890	80130805	-	1650	-
ENSBGRG00000000992	605	55.493	409	31.6519	426	34.6036	964	71.8112	470	45.1904	436	29.2926	283	24.4874	311	30.3634	686	43.4135	3	9118550	9127252	-	1264	DEDD
ENSBGRG00000000994	0	0	0	0	1	0.0866445	20	1.58918	0	0	0	0	0	0	0	0	0	0	5	117377829	117379013	-	1185	-
ENSBGRG00000000995	0	0	0	0	0	0	0	0	0	0	0	0	0	0	0	0	0	0	3	108058411	108192985	+	2690	-
ENSBGRG00000000997	36	4.61705	20	2.16414	38	4.31593	24	2.4998	31	4.16762	46	4.32123	64	7.74311	0	0	0	0	3	38040707	38048102	-	904	TAF13
ENSBGRG00000000998	99	5.30651	72	3.25611	69	3.27531	59	2.56837	44	2.47224	17	0.667438	135	6.82623	42	2.39624	15	0.554731	8	81834260	81868983	+	2163	HMMR
ENSBGRG00000000999	72	4.67654	80	4.38404	37	2.12825	77	4.06176	45	3.06386	295	14.0347	80	4.9018	64	4.42465	56	2.50956	7	10063923	10154671	+	1785	EPHX2
ENSBGRG00000001001	299	14.6269	200	8.25476	221	9.57422	331	13.1505	149	7.6407	171	6.12726	361	16.6595	210	10.9347	385	12.9945	4	65460495	65987610	-	2370	ELMO1
ENSBGRG00000001002	219	17.4387	209	14.0413	157	11.0713	148	9.57111	142	11.8528	215	12.5399	164	12.3193	139	11.7812	176	9.66939	2	33026783	33035625	+	1456	RNF25
ENSBGRG00000001003	0	0	0	0	0	0	0	0	0	0	0	0	0	0	0	0	0	0	3	116218087	116219229	+	1143	-
ENSBGRG00000001004	5028	310.076	5976	310.939	4590	250.677	5606	280.774	3832	247.721	8307	375.236	5700	331.605	4277	280.749	5970	254.018	8	49471006	49556505	-	1880	VDAC1
ENSBGRG00000001005	192	7.45739	342	11.2074	320	11.0069	407	12.8384	240	9.77152	487	13.8549	196	7.18151	259	10.7076	1097	29.3975	8	13252086	13287680	+	2985	TECR
ENSBGRG00000001008	236	50.0213	214	38.2692	178	33.4112	169	29.0912	136	30.2167	187	29.0317	95	18.995	90	20.3045	131	19.1572	3	21069220	21076279	-	547	-
ENSBGRG00000001009	314	19.1102	307	15.764	175	9.43197	285	14.0868	135	8.6126	523	23.3144	217	12.4586	106	6.8667	738	30.9891	5	117381550	117401979	+	1905	GGA1
ENSBGRG00000001010	936	73.4229	967	63.9993	999	69.3985	861	54.8518	1109	91.1911	803	46.1381	756	55.9437	589	49.1788	615	33.285	1	138178384	138327719	+	1478	TFDP2
ENSBGRG00000001011	90	14.1198	97	12.8396	69	9.58659	107	13.6333	66	10.8541	144	16.5477	101	14.9479	39	6.51264	120	12.9893	3	38063292	38068884	+	739	-
ENSBGRG00000001012	45	2.67141	0	0	0	0	21	1.01246	5	0.311145	64	2.78289	43	2.40808	0	0	71	2.90806	3	99535786	99537738	+	1953	PARS2
ENSBGRG00000001014	159	4.21935	234	5.2391	143	3.36057	203	4.37498	188	5.22963	239	4.64552	65	1.62718	149	4.20864	111	2.0323	7	92777166	93139866	+	4369	CCDC171
ENSBGRG00000001015	0	0	0	0	0	0	0	0	0	0	0	0	0	0	0	0	0	0	1	45414862	45464345	-	1407	GABRR3
ENSBGRG00000001016	0	0	0	0	0	0	0	0	0	0	0	0	0	0	0	0	0	0	2	56350548	56352835	+	351	C2orf66
ENSBGRG00000001017	30	0.749445	43	0.906317	32	0.707942	83	1.68395	16	0.41899	0	0	79	1.86174	85	2.26019	102	1.75807	2	130446272	130691753	-	4641	CCDC141
ENSBGRG00000001018	0	0	0	0	0	0	0	0	0	0	0	0	0	0	0	0	0	0	5	80142984	80147446	-	1423	-
ENSBGRG00000001019	348	12.5887	422	12.8798	398	12.7501	406	11.9278	336	12.7411	501	13.2748	494	16.8579	162	6.23769	587	14.6507	3	9129766	9165695	+	3205	USP21
ENSBGRG00000001020	36	2.00471	36	1.69139	11	0.542464	34	1.53766	20	1.16747	0	0	16	0.84051	20	1.18546	0	0	7	105490758	105522426	-	2082	-
ENSBGRG00000001021	2	0.0931987	0	0	9	0.371408	20	0.756906	0	0	0	0	0	0	0	0	0	0	3	64432852	64572164	+	2488	-
ENSBGRG00000001022	338	19.4865	253	12.3064	217	11.0792	259	12.1269	187	11.3012	220	9.29028	294	15.9897	86	5.27744	206	8.19413	3	99545958	99572006	-	2011	TTC4
ENSBGRG00000001023	28	1.44408	0	0	11	0.502407	15	0.628285	18	0.973131	0	0	28	1.36228	0	0	19	0.676091	4	17962683	18163309	-	2248	TBXAS1
ENSBGRG00000001024	0	0	0	0	0	0	0	0	0	0	0	0	0	0	0	0	0	0	5	5298570	5320780	-	1739	GSG1
ENSBGRG00000001026	0	0	0	0	0	0	0	0	0	0	0	0	0	0	7	0.939982	0	0	5	110935470	110936584	+	919	-
ENSBGRG00000001027	0	0	0	0	0	0	0	0	0	0	0	0	0	0	0	0	0	0	7	31579190	31708870	+	990	-
ENSBGRG00000001028	0	0	0	0	0	0	0	0	0	0	0	0	0	0	0	0	0	0	6	55923089	55924375	-	1287	-
ENSBGRG00000001029	383	16.7061	430	15.8247	326	12.5928	211	7.47463	185	8.45886	324	10.3516	202	8.3119	104	4.82854	75	2.25712	2	56359260	56393944	+	2658	GTF3C3
ENSBGRG00000001030	0	0	0	0	0	0	0	0	0	0	0	0	0	0	0	0	0	0	1	90470846	90473958	-	672	-
ENSBGRG00000001031	20	1.19463	0	0	10	0.528973	0	0	0	0	0	0	61	3.43723	0	0	0	0	7	54843043	54921627	+	1941	CORO2A
ENSBGRG00000001032	0	0	0	0	0	0	0	0	0	0	0	0	0	0	0	0	0	0	1	45489694	45515098	+	945	-
ENSBGRG00000001033	0	0	0	0	0	0	0	0	0	0	0	0	0	0	0	0	0	0	7	31588267	31589786	-	858	-
ENSBGRG00000001034	0	0	0	0	0	0	0	0	0	0	0	0	0	0	0	0	0	0	8	21999946	22012705	-	1883	TLE6
ENSBGRG00000001035	0	0	0	0	0	0	0	0	0	0	0	0	0	0	0	0	0	0	3	38075746	38110264	-	709	CFAP276
ENSBGRG00000001036	109353	3456.46	156849	4182.88	204135	5714.09	146387	3757.81	144802	4797.78	154096	3567.63	132189	3941.58	145294	4888.27	71663	1562.84	5	39821013	39937790	-	3668	MYBPC1
ENSBGRG00000001037	4	0.222212	29	1.35925	28	1.37751	55	2.48143	0	0	0	0	0	0	11	0.65044	0	0	6	55945555	56005289	+	2087	TXK
ENSBGRG00000001038	0	0	0	0	14	1.3285	0	0	0	0	0	0	0	0	0	0	0	0	1	159265847	159287494	-	1082	SPATC1L
ENSBGRG00000001040	399	29.7873	299	18.8331	251	16.5944	397	24.0703	330	25.8248	710	38.8244	335	23.5927	100	7.94631	847	43.6274	2	33036140	33040009	-	1553	BCS1L
ENSBGRG00000001042	26360	2740.95	29864	2619.97	25024	2304.31	62594	5285.91	31961	3483.7	82137	6255.79	43317	4249.01	29913	3310.72	168877	12115.6	5	110945972	110950568	-	1115	-
ENSBGRG00000001043	0	0	0	0	0	0	0	0	0	0	0	0	6	0.424743	1	0.0798746	0	0	1	84388748	84390292	+	1545	-
ENSBGRG00000001044	0	0	0	0	0	0	0	0	0	0	0	0	0	0	0	0	0	0	7	31605272	31606240	-	969	OR13C4
ENSBGRG00000001045	170	13.5369	136	9.13694	146	10.2956	102	6.59631	72	6.00989	410	23.9134	147	11.0423	86	7.2891	508	27.9094	8	5870114	5891574	-	1456	COPE
ENSBGRG00000001046	0	0	0	0	0	0	0	0	0	0	0	0	0	0	0	0	0	0	1	45531850	45532773	+	924	-
ENSBGRG00000001048	1606	69.7372	1693	62.0253	2649	101.866	1554	54.8027	1782	81.1132	1857	59.0635	1523	62.3868	1147	53.0138	1835	54.9759	8	49574438	49645987	-	2670	-
ENSBGRG00000001050	3	0.0813038	24	0.548774	10	0.240004	0	0	13	0.369316	7	0.138955	19	0.485754	0	0	124	2.31861	3	131581191	131612660	-	4278	PASK
ENSBGRG00000001051	30	0.581537	5	0.0817748	26	0.446333	20	0.314861	22	0.447038	22	0.312369	0	0	84	1.73318	0	0	1	62711066	62842755	-	5981	CFAP44
ENSBGRG00000001053	0	0	0	0	0	0	0	0	0	0	0	0	0	0	0	0	0	0	1	45541605	45543152	+	324	-
ENSBGRG00000001054	378	2.92909	938	6.13248	888	6.09372	641	4.03395	927	7.52983	370	2.10005	139	1.01608	767	6.3262	611	3.26662	4	97248834	97652280	-	14962	DNAH11
ENSBGRG00000001055	30	2.34063	29	1.90898	70	4.83658	64	4.0553	63	5.15249	47	2.68595	23	1.69283	36	2.98965	30	1.61492	8	22032976	22034878	-	1486	-
ENSBGRG00000001056	265	23.8725	166	12.6169	148	11.8071	131	9.58418	165	15.5812	198	13.0649	88	7.47839	28	2.68483	171	10.6283	3	54958824	55096573	+	1287	DIPK1A
ENSBGRG00000001057	4	1.1623	7	1.71612	0	0	3	0.707963	3	0.913784	11	2.3412	0	0	0	0	0	0	1	138336519	138336917	+	399	-
ENSBGRG00000001058	0	0	0	0	0	0	0	0	0	0	0	0	0	0	0	0	0	0	2	56400723	56401733	+	1011	-
ENSBGRG00000001060	19	1.18242	42	2.20526	0	0	46	2.32491	12	0.782823	38	1.73216	44	2.58311	103	6.82278	0	0	8	22058907	22062062	-	1863	-
ENSBGRG00000001061	71	20.3251	138	33.3309	177	44.8722	54	12.5545	49	14.704	24	5.03239	129	34.8368	36	10.9694	66	13.0358	7	54896471	54896875	-	405	-
ENSBGRG00000001062	0	0	0	0	0	0	0	0	13	1.33666	0	0	13	1.2029	0	0	0	0	1	84672622	84983190	-	1182	TPRG1
ENSBGRG00000001063	0	0	0	0	0	0	0	0	0	0	0	0	0	0	0	0	0	0	3	64477863	64496915	-	1324	DNASE2B
ENSBGRG00000001064	52	6.37298	161	16.6478	31	3.36457	114	11.3469	35	4.49648	80	7.18153	131	15.1455	147	19.1762	52	4.39703	1	138357607	138399436	-	946	ATP1B3
ENSBGRG00000001065	411	7.76454	389	6.20035	272	4.55064	477	7.31854	427	8.45604	820	11.3469	310	5.52471	387	7.78201	1150	14.9896	2	33045779	33062604	+	6137	-
ENSBGRG00000001066	0	0	0	0	0	0	0	0	0	0	0	0	0	0	0	0	0	0	7	31725024	31725977	-	954	OR13C3
ENSBGRG00000001067	190	18.7956	246	20.532	99	8.67295	367	29.485	136	14.1028	252	18.2596	304	28.3694	99	10.4242	487	33.2391	7	105562261	105726802	-	1172	MOB3B
ENSBGRG00000001068	0	0	0	0	0	0	0	0	0	0	0	0	0	0	0	0	0	0	4	66017336	66018373	+	1038	-
ENSBGRG00000001069	12	0.409558	2	0.0575914	28	0.846295	2	0.0554366	0	0	0	0	0	0	0	0	0	0	7	10162299	10234784	+	3397	-
ENSBGRG00000001070	1171	50.0977	1347	48.6207	1727	65.4308	1828	63.5139	1354	60.7218	1696	53.1465	1318	53.1924	1118	50.9108	1098	32.4101	5	124956313	125121159	+	2710	ATXN10
ENSBGRG00000001073	200	25.2591	177	18.8605	89	9.95421	156	16.0009	73	9.66441	217	20.0741	96	11.4375	133	17.8791	18	1.56847	3	21093625	21152108	-	918	-
ENSBGRG00000001074	0	0	0	0	0	0	0	0	0	0	0	0	0	0	0	0	0	0	5	80165970	80171866	-	1692	-
ENSBGRG00000001075	60	2.44942	104	3.5821	136	4.91677	128	4.24379	20	0.855868	49	1.4652	184	7.08604	82	3.56314	65	1.83081	6	100085188	100242668	+	2840	RAP1GDS1
ENSBGRG00000001076	0	0	0	0	0	0	0	0	0	0	0	0	0	0	0	0	0	0	7	31786228	31787190	+	963	OR13C8
ENSBGRG00000001077	0	0	0	0	0	0	0	0	0	0	0	0	0	0	0	0	0	0	4	66367269	66368180	+	912	GPR141
ENSBGRG00000001078	0	0	0	0	0	0	9	0.300934	0	0	0	0	0	0	0	0	0	0	5	76572649	76580468	-	2816	WNT10B
ENSBGRG00000001079	6	0.47066	0	0	0	0	12	0.764485	0	0	34	1.95354	0	0	0	0	21	1.13656	7	54934321	54961917	+	1478	TRIM14
ENSBGRG00000001080	0	0	0	0	0	0	0	0	0	0	0	0	36	0.892828	48	1.3432	0	0	3	38082094	38165322	+	4410	ELAPOR1
ENSBGRG00000001081	4668	79.9415	2461	35.5587	2126	32.2429	2368	32.9348	2393	42.9585	3858	48.394	4425	71.4872	3898	71.0543	2377	28.0859	1	90492835	90584540	+	6770	ABCC5
ENSBGRG00000001082	25	2.36804	0	0	17	1.42602	22	1.6924	1	0.0992919	19	1.31823	0	0	0	0	0	0	6	56021170	56051702	-	1224	NIPAL1
ENSBGRG00000001083	0	0	0	0	0	0	0	0	0	0	0	0	0	0	0	0	0	0	7	31851865	31852827	-	963	-
ENSBGRG00000001084	70	2.47582	35	1.04444	94	2.94427	123	3.53312	48	1.77962	77	1.9948	43	1.43471	33	1.24234	25	0.610069	8	22070785	22076061	-	3278	ZNF555
ENSBGRG00000001085	0	0	0	0	0	0	0	0	0	0	0	0	0	0	0	0	0	0	4	53000987	53065447	+	2204	NPY
ENSBGRG00000001086	3	0.155623	56	2.45094	115	5.28299	14	0.589811	43	2.33822	0	0	38	1.85956	43	2.37426	0	0	5	18065066	18201107	-	2235	-
ENSBGRG00000001087	0	0	0	0	0	0	0	0	0	0	0	0	0	0	0	0	0	0	3	99575065	99627829	-	5580	MROH7
ENSBGRG00000001088	48	2.27239	60	2.39654	32	1.34159	56	2.15309	71	3.52342	159	5.51349	169	7.54748	49	2.46913	77	2.51507	7	54968727	54992936	-	2449	NANS
ENSBGRG00000001089	248	13.6658	229	10.6466	377	18.3973	223	9.97979	362	20.9102	236	9.52543	178	9.2529	412	24.1651	63	2.3952	4	66408195	66413824	-	2104	THAP5
ENSBGRG00000001090	97	3.11613	133	3.60485	169	4.80794	141	3.6787	114	3.83896	46	1.0824	60	1.81831	100	3.4194	72	1.59585	2	56431570	56530422	-	3609	CCDC150
ENSBGRG00000001092	71	11.0641	86	11.307	64	8.83215	154	19.4899	84	13.7215	48	5.47882	26	3.82212	65	10.7815	26	2.79543	7	31923288	31939336	+	744	NIPSNAP3B
ENSBGRG00000001093	113	5.74611	44	1.88773	125	5.62904	47	1.941	63	3.35816	33	1.22913	60	2.8782	25	1.35314	72	2.52607	8	22096346	22100433	-	2280	ZNF554
ENSBGRG00000001094	7	0.647188	0	0	0	0	0	0	16	1.55066	15	1.01581	1	0.087218	7	0.68887	0	0	1	84773400	84774653	+	1254	-
ENSBGRG00000001095	2	0.094567	14	0.55851	0	0	68	2.61126	17	0.842605	104	3.6019	55	2.45327	23	1.15756	8	0.260986	5	117411169	117427267	+	2452	SH3BP1
ENSBGRG00000001096	20	1.33187	9	0.50567	17	1.00256	0	0	9	0.628259	0	0	9	0.565389	0	0	3	0.137838	3	64569245	64630483	-	1741	-
ENSBGRG00000001097	1009	78.9356	1018	67.1928	950	65.8165	807	51.2728	664	54.4522	1083	62.0581	497	36.6785	556	46.2982	794	42.8568	5	47633294	47640609	+	1482	PA2G4
ENSBGRG00000001098	1057	33.5013	949	25.3773	278	7.80298	861	22.1626	969	32.194	1108	25.7226	975	29.1518	793	26.7526	1586	34.6822	2	33063359	33090311	-	3658	PLCD4
ENSBGRG00000001099	0	0	0	0	0	0	0	0	0	0	0	0	0	0	0	0	0	0	1	85079428	85080516	+	1089	-
ENSBGRG00000001100	57	2.58348	48	1.83554	47	1.8865	118	4.34354	56	2.66062	114	3.78462	31	1.32545	43	2.07446	74	2.31408	1	159299969	159330933	-	2558	LSS
ENSBGRG00000001101	0	0	0	0	0	0	0	0	0	0	0	0	0	0	0	0	0	0	5	76587180	76590191	+	1113	WNT1
ENSBGRG00000001102	527	20.4484	794	25.9934	373	12.817	575	18.1196	328	13.341	1340	38.084	553	20.2418	478	19.7417	746	19.9713	8	22115668	22133198	-	2988	THOP1
ENSBGRG00000001103	0	0	0	0	0	0	0	0	0	0	0	0	0	0	0	0	0	0	5	80184525	80191435	-	1770	-
ENSBGRG00000001104	0	0	0	0	0	0	2	0.17198	5	0.554947	0	0	0	0	0	0	0	0	7	105813719	105814813	-	1095	-
ENSBGRG00000001105	43	3.78541	0	0	5	0.389802	0	0	0	0	26	1.67651	39	3.23879	0	0	0	0	1	85098264	85099580	-	1317	-
ENSBGRG00000001106	225	13.8023	189	9.7819	251	13.6355	150	7.47294	186	11.9604	166	7.45873	50	2.89342	187	12.21	87	3.68218	5	83150959	83182407	+	1890	NR2C1
ENSBGRG00000001107	0	0	0	0	0	0	0	0	0	0	0	0	0	0	0	0	0	0	1	138467907	138521191	-	1656	GRK7
ENSBGRG00000001108	134	5.07707	134	4.28358	150	5.03303	183	5.63108	123	4.88516	139	3.85755	31	1.10801	130	5.24275	83	2.16972	1	62847974	62907240	-	3060	SPICE1
ENSBGRG00000001109	233	9.25765	235	7.87781	199	7.00208	110	3.54952	122	5.08124	185	5.384	130	4.87261	354	14.9711	91	2.49462	3	21155724	21213794	-	2918	HORMAD1
ENSBGRG00000001110	230	22.3896	330	27.1035	295	25.4314	87	6.87812	284	28.9802	52	3.70775	227	20.8458	169	17.511	228	15.3134	7	55013169	55041488	-	1191	ANP32B
ENSBGRG00000001111	217	5.59582	222	4.83003	247	5.64066	182	3.8116	176	4.75753	265	5.00539	145	3.52733	176	4.83085	157	2.79332	7	105828572	105867905	-	4496	C9orf72
ENSBGRG00000001113	0	0	0	0	0	0	0	0	0	0	0	0	0	0	0	0	0	0	1	85176592	85177698	+	1107	-
ENSBGRG00000001114	0	0	0	0	0	0	0	0	1	0.0735229	0	0	0	0	0	0	0	0	7	92956972	92958624	-	1653	-
ENSBGRG00000001115	665	34.1451	766	33.1839	649	29.5107	579	24.1444	432	23.2517	735	27.6428	493	23.8796	484	26.452	426	15.0915	2	130728460	130833120	-	2258	SESTD1
ENSBGRG00000001116	340	11.666	396	11.4638	419	12.7317	281	7.83033	424	15.2501	201	5.05157	168	5.43782	394	14.3895	253	5.98935	2	5819777	5898496	-	3379	USP48
ENSBGRG00000001118	148	25.1598	120	17.2115	228	34.3249	288	39.7622	192	34.2147	111	13.8216	225	36.0829	47	8.50453	210	24.631	4	66416182	66417781	+	682	DNAJB9
ENSBGRG00000001119	0	0	0	0	0	0	0	0	0	0	0	0	0	0	0	0	0	0	6	56084938	56100962	+	2706	CNGA1
ENSBGRG00000001121	1449	57.4345	1540	51.5013	1446	50.7577	1767	56.8817	1186	49.2781	1856	53.8853	1564	58.481	1107	46.7045	1808	49.4448	1	85249182	86007152	-	2925	LPP
ENSBGRG00000001122	71	4.21273	80	4.00487	33	1.734	70	3.37315	73	4.54039	152	6.60598	69	3.86214	93	5.87348	197	8.06472	8	5891093	5898778	+	1954	DDX49
ENSBGRG00000001124	54	4.34169	15	1.01753	81	5.76739	145	9.46814	34	2.86556	108	6.36029	243	18.4308	48	4.10784	388	21.5236	3	9166753	9170134	+	1442	PPOX
ENSBGRG00000001125	218	32.362	279	34.9443	100	13.1464	293	35.3247	105	16.3393	509	55.3459	301	42.1521	106	16.7491	371	37.9989	8	13287737	13292418	-	781	NDUFB7
ENSBGRG00000001126	24	1.32062	15	0.696386	36	1.75427	4	0.178755	8	0.461446	25	1.00761	24	1.24581	0	0	22	0.83523	8	49590656	49627245	+	2107	TCF7
ENSBGRG00000001127	0	0	1	0.136428	23	3.29358	2	0.262647	0	0	0	0	0	0	0	0	0	0	4	66996790	66999333	+	717	-
ENSBGRG00000001128	0	0	0	0	0	0	0	0	0	0	0	0	0	0	0	0	0	0	5	76605429	76611389	-	4329	DDN
ENSBGRG00000001129	0	0	0	0	0	0	0	0	0	0	0	0	0	0	0	0	0	0	7	55079276	55099955	+	2256	HEMGN
ENSBGRG00000001130	583	53.4751	579	44.8079	474	38.5026	374	27.8604	421	40.4791	395	26.538	682	59.0121	365	35.6355	390	24.6811	2	33100868	33133170	-	1264	CNOT9
ENSBGRG00000001131	0	0	0	0	0	0	0	0	0	0	0	0	0	0	0	0	0	0	5	80223375	80231063	-	1578	KRT71
ENSBGRG00000001132	1296	68.7991	802	35.9207	391	18.3816	884	38.112	764	42.5144	851	33.0899	727	36.4071	636	35.937	406	14.8703	7	93694331	93846527	-	2184	BNC2
ENSBGRG00000001133	0	0	0	0	0	0	0	0	0	0	0	0	0	0	0	0	0	0	7	10193577	10194738	+	570	-
ENSBGRG00000001134	89	30.1713	181	51.7697	59	17.7127	77	21.1996	50	17.768	183	45.4405	33	10.5534	19	6.8559	229	53.562	1	138554497	138560974	-	342	RNF7
ENSBGRG00000001135	4	0.400481	0	0	0	0	0	0	0	0	0	0	0	0	0	0	0	0	2	131068421	131069578	-	1158	-
ENSBGRG00000001136	588	36.6715	1161	61.0908	434	23.9701	709	35.9111	360	23.5352	564	25.7643	459	27.0046	636	42.2197	760	32.7026	3	38176101	38198550	+	1859	SARS1
ENSBGRG00000001137	5515	448.39	6492	445.33	5294	381.174	4298	283.798	3795	323.435	4835	287.936	3999	306.715	4256	368.315	3886	217.987	3	55098033	55110810	-	1426	-
ENSBGRG00000001138	534	25.6894	1367	55.4849	1127	48.0138	836	32.6626	314	15.8346	480	16.9139	675	30.6331	549	28.112	1271	42.1868	5	5450783	5479693	+	2410	-
ENSBGRG00000001139	0	0	0	0	0	0	0	0	0	0	0	0	0	0	0	0	0	0	5	125192473	125258039	-	5212	WNT7B
ENSBGRG00000001141	3524	52.2869	2095	26.2261	1505	19.7753	2543	30.6433	1558	24.232	3026	32.8862	1181	16.5303	3238	51.1376	3439	35.2052	7	31964278	32110729	-	7814	ABCA1
ENSBGRG00000001142	0	0	0	0	0	0	12	0.827772	1	0.0890354	0	0	0	0	0	0	0	0	4	68421756	68423120	+	1365	-
ENSBGRG00000001143	306	9.8933	327	8.91991	236	6.75711	210	5.51405	326	11.0485	152	3.59958	251	7.65539	298	10.2552	127	2.83296	6	56120473	56183458	+	3586	NFXL1
ENSBGRG00000001144	192	14.6836	227	14.647	106	7.17903	133	8.26066	170	13.6284	272	15.2366	126	9.09024	29	2.36067	136	7.17608	7	55102487	55115097	+	1516	TRMO
ENSBGRG00000001145	156	46.7352	231	58.3881	144	38.2042	202	49.1476	122	38.3128	236	51.7868	259	73.1969	82	26.1481	261	53.9482	5	110982216	110983102	+	387	MRPL51
ENSBGRG00000001146	149	7.42051	205	8.61378	157	6.9243	242	9.78801	162	8.45721	74	2.6994	117	5.49676	108	5.72503	209	7.18143	4	97670797	97756358	-	2328	SP4
ENSBGRG00000001147	326	13.4554	316	11.0042	273	9.97861	274	9.18461	301	13.023	200	6.0464	216	8.41019	71	3.1192	339	9.65374	4	53407196	53545625	+	2809	PALS2
ENSBGRG00000001148	210	11.3243	147	6.68809	321	15.3294	211	9.24073	243	13.7361	152	6.00376	236	12.0054	17	0.97577	76	2.82763	2	131088750	131492904	-	2150	ZNF385B
ENSBGRG00000001150	480	27.0675	228	10.8476	224	11.1862	191	8.74727	272	16.0783	327	13.5065	158	8.405	190	11.4043	127	4.94115	5	76614065	76630387	-	2056	PRKAG1
ENSBGRG00000001152	11	1.94114	5	0.744437	18	2.81298	25	3.58292	0	0	2	0.258513	0	0	44	8.26465	0	0	7	105932889	105933545	-	657	-
ENSBGRG00000001153	168	13.5545	204	13.8866	86	6.1447	214	14.0223	78	6.5968	175	10.3419	78	5.93665	74	6.35495	140	7.79326	4	68460906	69514181	-	1437	IMMP2L
ENSBGRG00000001154	0	0	0	0	0	0	0	0	0	0	0	0	0	0	0	0	0	0	7	10194063	10194858	+	465	-
ENSBGRG00000001155	18	7.2462	0	0	0	0	0	0	0	0	0	0	0	0	0	0	0	0	8	22128982	22130235	-	288	-
ENSBGRG00000001156	0	0	0	0	0	0	0	0	0	0	0	0	0	0	0	0	0	0	7	93766701	93767792	+	1092	-
ENSBGRG00000001157	0	0	0	0	0	0	0	0	0	0	0	0	0	0	0	0	0	0	1	85785744	85786754	+	1011	-
ENSBGRG00000001158	0	0	0	0	0	0	0	0	0	0	0	0	0	0	0	0	0	0	5	80246690	80250059	-	540	-
ENSBGRG00000001159	0	0	0	0	0	0	0	0	0	0	0	0	0	0	0	0	0	0	7	106339633	106341453	-	1821	LINGO2
ENSBGRG00000001160	0	0	0	0	0	0	0	0	18	2.07749	0	0	0	0	0	0	0	0	8	13307233	13329853	+	1053	CLEC17A
ENSBGRG00000001162	0	0	0	0	0	0	0	0	0	0	10	0.468662	0	0	0	0	47	2.07485	5	117428581	117438364	+	1812	PDXP
ENSBGRG00000001163	191	11.0391	356	17.3597	73	3.73638	288	13.5183	104	6.30083	286	12.1075	284	15.4843	102	6.27489	796	31.7417	8	5900192	5913585	-	2006	-
ENSBGRG00000001164	0	0	0	0	0	0	0	0	0	0	0	0	0	0	0	0	0	0	1	85974659	85975681	+	1023	-
ENSBGRG00000001165	499	11.8528	639	12.806	577	12.1374	505	9.74192	506	12.599	436	7.58571	504	11.2934	410	10.366	486	7.96481	2	33132978	33222832	+	4881	USP37
ENSBGRG00000001166	111	5.05271	160	6.14489	235	9.47323	50	1.84843	155	7.39602	52	1.73378	114	4.8953	33	1.5989	58	1.82157	1	138694522	138825338	-	2547	RASA2
ENSBGRG00000001167	239	12.2284	442	19.0803	206	9.33397	228	9.47408	277	14.8565	284	10.6433	238	11.4874	199	10.8375	126	4.44793	3	64701033	64855465	-	2266	PRKACB
ENSBGRG00000001168	17	14.9316	0	0	23	17.8901	44	31.3864	43	39.5904	59	37.9574	36	29.8286	0	0	0	0	7	93876424	94018981	-	132	-
ENSBGRG00000001169	44	13.8623	0	0	1	0.279005	0	0	0	0	43	9.92291	0	0	34	11.4017	35	7.60795	5	110995911	111003139	+	368	VAMP1
ENSBGRG00000001171	0	0	0	0	0	0	0	0	0	0	0	0	0	0	0	0	0	0	7	106430087	106430443	-	249	-
ENSBGRG00000001172	296	35.8225	397	40.5367	366	39.2261	702	68.9976	370	46.9388	1131	100.257	440	50.2332	192	24.7328	704	58.7834	5	117446439	117450161	+	958	LGALS1
ENSBGRG00000001175	0	0	0	0	0	0	0	0	0	0	0	0	0	0	0	0	0	0	7	55153382	55154503	-	1122	FOXE1
ENSBGRG00000001176	2	0.474189	0	0	0	0	2	0.385109	0	0	1	0.173664	0	0	0	0	0	0	4	97969081	97969569	-	489	-
ENSBGRG00000001177	0	0	0	0	12	0.579259	0	0	0	0	0	0	0	0	0	0	0	0	4	69017804	69019930	+	2127	LRRN3
ENSBGRG00000001178	662	33.7074	628	26.9786	389	17.5407	694	28.6985	300	16.0123	623	23.235	466	22.3834	519	28.1282	1120	39.3462	8	22135259	22150564	+	2277	SGTA
ENSBGRG00000001179	0	0	0	0	0	0	0	0	0	0	0	0	0	0	0	0	0	0	1	86099203	86100435	-	1233	-
ENSBGRG00000001180	0	0	0	0	0	0	0	0	0	0	0	0	0	0	0	0	0	0	7	94111856	94112934	+	321	-
ENSBGRG00000001183	0	0	2	0.931609	28	13.6898	2	0.896753	3	1.73619	1	0.404389	0	0	4	2.35059	2	0.761831	7	106665164	106666113	+	210	-
ENSBGRG00000001184	0	0	0	0	0	0	0	0	7	0.169841	5	0.0847691	0	0	18	0.443464	0	0	5	5842806	6272730	-	5009	GRIN2B
ENSBGRG00000001185	0	0	0	0	0	0	0	0	0	0	0	0	0	0	0	0	0	0	7	10204591	10216870	-	1268	-
ENSBGRG00000001188	0	0	0	0	0	0	0	0	0	0	0	0	0	0	0	0	0	0	4	69412867	69413148	+	282	-
ENSBGRG00000001190	1852	2752.81	1706	2139.48	2155	2836.69	2227	2688.36	1451	2260.83	2957	3219.4	1619	2270.16	1445	2286.18	1370	1404.99	5	47643993	47645007	+	78	-
ENSBGRG00000001191	984	39.7091	1461	49.7436	1592	56.894	930	30.4796	1192	50.4238	1783	52.7028	1116	42.4847	1798	77.2309	716	19.9354	5	83192868	83302477	+	2873	NDUFA12
ENSBGRG00000001192	27	2.14702	14	0.939277	23	1.61968	53	3.42279	0	0	10	0.582453	10	0.750147	0	0	38	2.08485	3	9170715	9175216	-	1458	B4GALT3
ENSBGRG00000001193	0	0	0	0	0	0	0	0	0	0	0	0	0	0	0	0	0	0	8	19292672	19294093	-	570	CAPS
ENSBGRG00000001194	0	0	0	0	0	0	0	0	0	0	0	0	0	0	0	0	0	0	5	80268492	80281702	-	1753	KRT72
ENSBGRG00000001195	0	0	0	0	0	0	0	0	0	0	0	0	0	0	0	0	0	0	4	98527923	98532453	+	3533	SP8
ENSBGRG00000001196	986	74.8631	1132	72.5154	1004	67.5078	1043	64.3143	865	68.845	1008	56.0583	646	46.2698	565	45.6611	770	40.3366	2	82450489	82480833	+	1527	UBXN4
ENSBGRG00000001197	0	0	0	0	0	0	18	1.23713	0	0	0	0	0	0	0	0	43	2.5107	5	117454341	117461233	+	1370	NOL12
ENSBGRG00000001198	1786	129.741	1427	87.4609	1222	78.6136	1353	79.8228	1122	85.4388	1525	81.1438	1944	133.219	2050	158.511	972	48.7171	5	125451026	125527207	+	1596	PPARA
ENSBGRG00000001199	137	12.758	116	9.11406	152	12.5353	110	8.31927	174	16.9854	115	7.84417	94	8.25776	43	4.26222	35	2.24878	7	55312778	55346432	+	1245	XPA
ENSBGRG00000001201	1194	49.3165	762	26.5543	462	16.8989	854	28.6469	903	39.0967	767	23.2045	1048	40.8341	658	28.9281	1435	40.8938	1	86527161	86553304	+	2807	BCL6
ENSBGRG00000001202	0	0	0	0	0	0	0	0	0	0	0	0	0	0	0	0	0	0	3	99655063	99716564	+	3211	-
ENSBGRG00000001203	214	2.8323	294	3.28297	102	1.19552	242	2.6012	57	0.790799	362	3.50932	258	3.22121	99	1.39466	439	4.00874	3	38214139	38240461	+	8760	CELSR2
ENSBGRG00000001204	0	0	0	0	0	0	0	0	0	0	0	0	0	0	0	0	0	0	7	106686562	106687510	+	507	-
ENSBGRG00000001205	36	1.68843	32	1.26626	0	0	52	1.98069	0	0	73	2.5078	70	3.09709	0	0	38	1.22965	8	22163580	22171543	+	2472	SLC39A3
ENSBGRG00000001206	314	21.9439	154	9.08024	164	10.1498	211	11.9756	112	8.20478	132	6.75688	126	8.30669	71	5.2814	201	9.69164	5	47647816	47649474	+	1659	ZC3H10
ENSBGRG00000001207	0	0	14	1.80668	20	2.70907	88	10.9314	0	0	69	7.73033	16	2.30863	10	1.62805	129	13.6135	5	125538669	125542256	-	758	CDPF1
ENSBGRG00000001208	0	0	0	0	0	0	0	0	0	0	0	0	0	0	0	0	0	0	2	131154752	131155198	+	447	-
ENSBGRG00000001209	214	5.25879	115	2.38431	126	2.74203	92	1.83608	188	4.84279	76	1.36796	67	1.55318	282	7.37612	116	1.96674	7	94464348	94845554	+	4718	CNTLN
ENSBGRG00000001210	24	0.823724	26	0.752899	8	0.243159	37	1.03135	0	0	19	0.477653	45	1.45699	13	0.47492	84	1.98915	3	9186107	9194906	-	3378	ADAMTS4
ENSBGRG00000001213	22	2.52291	53	5.128	15	1.52335	0	0	4	0.480844	44	3.6959	3	0.324544	0	0	50	3.95609	8	5903261	5904705	-	1011	-
ENSBGRG00000001216	105	2.74428	220	4.85126	148	3.42554	105	2.22874	154	4.21915	272	5.2071	206	5.07902	162	4.50672	192	3.46224	7	74567163	74715397	-	4436	TJP2
ENSBGRG00000001217	0	0	0	0	0	0	12	2.25531	0	0	39	6.61067	0	0	0	0	46	7.34459	8	19298855	19300561	-	501	VMAC
ENSBGRG00000001218	1389	21.5986	817	10.7186	631	8.68926	1268	16.0131	768	12.5185	1442	16.424	1100	16.1358	571	9.45077	1761	18.893	5	76635453	76651587	-	7456	-
ENSBGRG00000001219	0	0	0	0	0	0	0	0	0	0	0	0	0	0	0	0	0	0	3	21220683	21221015	+	333	-
ENSBGRG00000001220	2048	62.5016	1954	50.3128	1662	44.9181	1367	33.8814	1277	40.8523	1323	29.5739	1280	36.8506	2032	66.0072	1496	31.5	5	6778267	6891678	+	3799	ATF7IP
ENSBGRG00000001221	346	13.0159	400	12.6955	293	9.761	179	5.46868	135	5.32349	264	7.27427	102	3.61969	324	12.9733	0	0	2	131718005	131765600	-	3082	CWC22
ENSBGRG00000001224	0	0	0	0	11	0.180735	0	0	16	0.311175	0	0	6	0.105013	31	0.612193	10	0.128008	5	125556670	125563672	-	6249	PKDREJ
ENSBGRG00000001226	93	25.3107	158	36.2803	33	7.9536	230	50.837	12	3.42347	674	134.36	97	24.9038	83	24.0439	758	142.334	8	19302267	19307692	+	426	NDUFA11
ENSBGRG00000001227	1338	32.3248	788	16.062	713	15.2545	1080	21.1902	637	16.1318	1271	22.4912	1210	27.5765	834	21.4463	1537	25.6195	8	5984736	6019415	-	4799	SUGP2
ENSBGRG00000001228	0	0	0	0	0	0	0	0	0	0	0	0	0	0	0	0	0	0	3	21222512	21222840	+	204	-
ENSBGRG00000001229	500	17.3302	406	11.8728	418	12.8304	599	16.8614	270	9.80986	767	19.4723	546	17.8526	252	9.29697	871	20.8291	5	47656309	47671460	+	3345	ESYT1
ENSBGRG00000001231	0	0	0	0	0	0	0	0	0	0	0	0	0	0	0	0	0	0	2	82485739	82543645	-	5784	LCT
ENSBGRG00000001232	0	0	0	0	0	0	0	0	0	0	0	0	0	0	0	0	0	0	7	109409799	109410645	-	618	-
ENSBGRG00000001233	0	0	25	0.573248	0	0	0	0	0	0	0	0	0	0	0	0	0	0	4	98550630	98684048	-	4266	ABCB5
ENSBGRG00000001236	34	7.10258	0	0	22	4.06995	21	3.56277	37	8.10222	70	10.7108	74	14.5829	21	4.66942	167	24.0697	5	111007730	111011676	-	555	-
ENSBGRG00000001237	18	0.598481	23	0.645207	28	0.824452	45	1.21513	0	0	18	0.438368	19	0.595944	15	0.530856	27	0.619383	1	62935615	63048786	+	3487	SIDT1
ENSBGRG00000001238	24	1.65726	105	6.11733	41	2.50722	18	1.00945	34	2.46107	50	2.52893	22	1.4331	0	0	64	3.04914	5	83443657	83644947	+	1679	TMCC3
ENSBGRG00000001240	204	15.2394	243	15.3157	141	9.32796	201	12.1946	84	6.57783	233	12.7492	86	6.06053	103	8.18997	163	8.40124	3	21233550	21247798	-	1552	CTSK
ENSBGRG00000001242	12	1.01999	73	5.23518	0	0	0	0	0	0	0	0	31	2.48571	0	0	0	0	8	13347191	13376836	-	1364	ADGRE3
ENSBGRG00000001243	0	0	0	0	0	0	0	0	0	0	0	0	0	0	0	0	0	0	8	19317078	19318709	+	1632	-
ENSBGRG00000001244	14	7.8413	46	21.7375	17	8.43214	36	16.3755	22	12.9166	65	26.6662	61	32.2302	33	19.6735	71	27.4369	8	22335007	22339354	+	207	GNG7
ENSBGRG00000001245	0	0	0	0	0	0	0	0	0	0	0	0	0	0	0	0	0	0	1	86527411	86527518	-	108	-
ENSBGRG00000001246	1132	35.3374	613	16.1451	855	23.6365	1109	28.1159	765	25.0331	1233	28.1929	1037	30.538	863	28.6752	1072	23.0888	1	138894957	138947678	-	3714	ZBTB38
ENSBGRG00000001247	313	15.7299	363	15.3915	109	4.85108	294	11.9995	136	7.16451	234	8.61364	275	13.0373	247	13.2125	405	14.0428	5	76663737	76669220	-	2307	-
ENSBGRG00000001248	16	1.45492	24	1.8413	0	0	14	1.0339	14	1.33448	25	1.66513	2	0.171563	1	0.0967892	0	0	6	56185241	56186515	+	1275	-
ENSBGRG00000001249	72	6.8818	5	0.403211	1	0.0846444	68	5.2785	19	1.90365	12	0.840115	18	1.62299	40	4.06946	22	1.45081	7	10247990	10269161	-	1213	APTX
ENSBGRG00000001250	0	0	0	0	0	0	0	0	0	0	0	0	0	0	0	0	0	0	1	86575974	86579746	+	710	RTP2
ENSBGRG00000001251	972	31.1048	1026	27.7014	880	24.9387	725	18.8422	847	28.4126	698	16.3608	572	17.2676	1001	34.096	793	17.5086	7	55348421	55388553	-	3623	NCBP1
ENSBGRG00000001254	258	7.76338	403	10.2313	569	15.1626	304	7.42911	328	10.3459	168	3.70279	256	7.26683	440	14.0926	147	3.05187	3	55153386	55411992	+	3853	EVI5
ENSBGRG00000001255	0	0	0	0	0	0	0	0	0	0	0	0	0	0	0	0	0	0	8	19348788	19349891	+	1104	-
ENSBGRG00000001256	2454	130.094	2659	118.93	1669	78.355	2793	120.25	1280	71.1306	5147	199.859	2445	122.274	1886	106.422	3364	123.042	3	9198739	9214096	+	2187	NDUFS2
ENSBGRG00000001258	0	0	0	0	0	0	0	0	0	0	0	0	0	0	0	0	0	0	1	86604431	86606622	+	1355	SST
ENSBGRG00000001259	253	5.38411	122	2.19051	45	0.848076	167	2.8863	71	1.58386	362	5.64274	580	11.6438	14	0.317123	230	3.37706	3	99681968	99764822	-	5448	ACOT11
ENSBGRG00000001260	104	5.60561	151	6.86688	91	4.3437	253	11.075	78	4.40707	92	3.63217	255	12.9659	54	3.09806	249	9.25991	8	13440882	13464192	+	2151	ZNF333
ENSBGRG00000001261	11	2.14702	16	2.63485	0	0	0	0	0	0	0	0	0	0	0	0	11	1.48134	8	19354143	19360920	-	594	NRTN
ENSBGRG00000001262	0	0	0	0	34	4.58124	4	0.494273	0	0	45	5.01506	0	0	0	0	42	4.40902	5	111014919	111021177	-	762	CD27
ENSBGRG00000001263	47	2.38788	12	0.514385	26	1.16981	59	2.43444	11	0.585831	141	5.24713	45	2.15675	73	3.9477	36	1.26193	1	139076689	139174896	-	2282	PXYLP1
ENSBGRG00000001264	619	14.359	927	18.1429	741	15.2223	731	13.7716	590	14.3467	698	11.8598	579	12.6703	696	17.185	689	11.0273	7	111424407	111504493	+	4998	ACO1
ENSBGRG00000001265	0	0	0	0	1	0.0572956	6	0.315265	0	0	10	0.473893	0	0	0	0	0	0	4	53558263	53624215	-	1792	GSDME
ENSBGRG00000001266	25	1.21734	14	0.575164	12	0.517465	22	0.870012	0	0	20	0.713327	16	0.734961	0	0	0	0	3	38244444	38249213	-	2381	PSRC1
ENSBGRG00000001267	10	1.63065	0	0	0	0	0	0	0	0	0	0	0	0	0	0	0	0	2	132799188	132800285	+	711	-
ENSBGRG00000001268	90	3.25672	34	1.03803	29	0.929319	153	4.49636	39	1.47934	287	7.6069	39	1.3313	0	0	105	2.62147	5	125613250	125641164	+	3204	TTC38
ENSBGRG00000001269	42	2.05462	52	2.14624	6	0.259933	18	0.715132	35	1.7948	31	1.11079	115	5.30705	6	0.312421	43	1.45134	8	22367312	22371147	-	2370	-
ENSBGRG00000001270	190	8.93286	154	6.10873	287	11.9495	180	6.87292	164	8.08251	235	8.09269	42	1.86277	250	12.5108	137	4.44401	2	82554641	82590512	-	2466	MCM6
ENSBGRG00000001271	16	0.921981	41	1.99333	21	1.07164	77	3.6035	22	1.32889	41	1.73051	18	0.978472	19	1.16537	298	11.8478	8	6025299	6036054	+	2012	ARMC6
ENSBGRG00000001272	40	1.29686	67	1.83274	31	0.890069	76	2.00114	18	0.611745	41	0.973654	44	1.34573	0	0	65	1.454	1	86887264	86918432	-	3576	-
ENSBGRG00000001273	3	0.453478	10	1.27534	0	0	0	0	0	0	11	1.21791	0	0	0	0	0	0	5	76684284	76688032	-	767	RHEBL1
ENSBGRG00000001274	0	0	0	0	0	0	0	0	0	0	0	0	21	1.90923	0	0	0	0	8	13516523	13542156	-	1203	-
ENSBGRG00000001275	1018	19.843	631	10.3772	1337	23.0791	840	13.2975	727	14.8545	859	12.2642	1040	19.1234	874	18.1333	1019	13.7041	4	69691132	70232453	-	5948	DOCK4
ENSBGRG00000001276	36	1.94131	9	0.409475	40	1.91021	20	0.875898	2	0.113054	11	0.434483	88	4.4766	73	4.19007	18	0.669702	5	18337412	18384372	+	2150	IRAG2
ENSBGRG00000001277	225	8.68097	198	6.44531	198	6.76519	74	2.31873	316	12.7802	30	0.847803	99	3.60325	143	5.87258	99	2.63535	5	83748228	83905006	+	3005	CEP83
ENSBGRG00000001278	49	2.52714	53	2.30623	32	1.46155	64	2.68068	11	0.594691	106	4.00431	8	0.389222	15	0.82344	87	3.09578	8	19386593	19391517	+	2248	DUS3L
ENSBGRG00000001280	13	0.439804	0	0	0	0	0	0	0	0	0	0	0	0	0	0	0	0	6	56193844	56534683	+	3427	CORIN
ENSBGRG00000001281	119	10.6211	126	9.48821	41	3.24066	177	12.83	63	5.89423	218	14.2517	113	9.51422	37	3.51503	168	10.3454	5	111065131	111073359	-	1299	LTBR
ENSBGRG00000001282	0	0	0	0	0	0	0	0	0	0	0	0	0	0	0	0	0	0	8	13749463	13750507	-	1045	-
ENSBGRG00000001283	1118	27.5553	1019	21.1899	700	15.2788	992	19.8567	816	21.0823	1013	18.2878	1051	24.4365	674	17.6819	809	13.7572	3	21251054	21324904	-	4704	ARNT
ENSBGRG00000001284	0	0	0	0	0	0	0	0	0	0	0	0	0	0	0	0	0	0	1	139104991	139106365	+	630	-
ENSBGRG00000001285	0	0	0	0	0	0	0	0	0	0	0	0	0	0	0	0	0	0	8	13753286	13868011	-	933	-
ENSBGRG00000001286	212	16.1492	286	18.3812	432	29.1426	303	18.7452	246	19.6434	372	20.7561	466	33.4869	384	31.1353	295	15.5044	2	132915888	133014146	+	1522	UBE2E3
ENSBGRG00000001287	22	2.47878	11	1.04568	5	0.4989	17	1.55559	18	2.12595	0	0	21	2.23207	34	4.07756	0	0	8	49654952	49655980	-	1029	-
ENSBGRG00000001288	8	0.699482	1	0.07377	0	0	0	0	0	0	0	0	0	0	0	0	0	0	8	81882048	81883373	+	1326	-
ENSBGRG00000001290	0	0	0	0	0	0	0	0	0	0	0	0	0	0	0	0	0	0	5	80293141	80302961	-	1620	KRT73
ENSBGRG00000001292	186	8.07666	224	8.20653	184	7.07564	155	5.46616	127	5.7808	109	3.46684	56	2.29393	128	5.9161	145	4.34415	5	111081255	111084014	+	2670	-
ENSBGRG00000001293	100	7.35188	60	3.72171	0	0	90	5.37369	32	2.46612	329	17.7167	60	4.16125	106	8.2949	232	11.768	8	6036075	6086421	+	1577	SLC25A42
ENSBGRG00000001294	0	0	0	0	0	0	0	0	0	0	0	0	0	0	0	0	0	0	8	13926734	13930073	+	936	-
ENSBGRG00000001295	0	0	0	0	0	0	0	0	0	0	0	0	0	0	0	0	0	0	3	99682195	99684907	+	1451	-
ENSBGRG00000001296	810	53.5409	952	53.0922	1186	69.4248	764	41.0134	588	40.7421	842	40.7663	841	52.4409	988	69.5127	1026	46.7913	2	82629725	82700692	-	1754	DARS1
ENSBGRG00000001297	10	0.795193	15	1.00637	0	0	12	0.774972	0	0	32	1.86385	33	2.47548	0	0	1	0.0548643	1	139245929	139329425	-	1458	SPSB4
ENSBGRG00000001298	80	1.27458	68	0.91407	82	1.15697	112	1.4492	14	0.233814	96	1.12031	21	0.315625	74	1.25492	158	1.73681	5	117471956	117536766	+	7277	TRIOBP
ENSBGRG00000001299	1908	237.862	1545	162.506	1841	203.25	1553	157.235	1171	153.027	1878	171.487	1287	151.356	1565	207.667	1015	87.3033	8	49673955	49700164	-	930	PP2Acalpha
ENSBGRG00000001300	267	16.6429	396	20.826	330	18.2163	355	17.9712	217	14.1789	443	20.226	511	30.0477	203	13.4685	286	12.2999	8	81886148	81903329	+	1860	MAT2B
ENSBGRG00000001302	11	1.15939	0	0	42	3.92027	63	5.39275	26	2.87261	51	3.93728	30	2.98286	0	0	35	2.54521	3	38256142	38269810	-	1100	MYBPHL
ENSBGRG00000001303	273	10.0961	271	8.4558	158	5.17462	252	7.56877	118	4.57446	210	5.68853	320	11.1639	469	18.4617	77	1.96472	7	111511706	111566960	-	3135	DDX58
ENSBGRG00000001304	0	0	15	1.08527	0	0	5	0.348221	0	0	0	0	9	0.728064	0	0	0	0	5	76707938	76712614	-	1352	DHH
ENSBGRG00000001305	393	8.35732	277	4.96989	537	10.1129	219	3.78225	177	3.9456	313	4.87536	478	9.58906	450	10.1858	228	3.34524	2	56756713	57057645	+	5452	HECW2
ENSBGRG00000001306	1653	25.9123	790	10.4485	1441	20.0044	1606	20.4461	1159	19.045	1857	21.3223	1877	27.7569	1676	27.965	2386	25.806	1	86990622	87061841	+	7396	MASP1
ENSBGRG00000001307	7	0.571934	1	0.0689351	0	0	0	0	0	0	0	0	0	0	1	0.086967	0	0	3	99766748	99768166	-	1419	-
ENSBGRG00000001308	0	0	0	0	0	0	0	0	0	0	0	0	0	0	0	0	0	0	5	80309475	80316991	-	1854	KRT2
ENSBGRG00000001309	92	3.82995	37	1.29957	9	0.3318	100	3.38094	60	2.61831	94	2.8663	49	1.92431	101	4.47541	166	4.76794	8	22386791	22408815	+	2785	LMNB2
ENSBGRG00000001310	3	0.15044	0	0	18	0.799363	27	1.09961	0	0	83	3.04866	0	0	0	0	0	0	5	125645903	125665775	+	2312	GTSE1
ENSBGRG00000001311	0	0	0	0	0	0	0	0	0	0	0	0	0	0	0	0	0	0	8	13960989	13961918	-	930	-
ENSBGRG00000001312	0	0	15	0.570928	13	0.519361	10	0.366378	0	0	0	0	0	0	0	0	0	0	2	33229039	33252499	-	2570	VIL1
ENSBGRG00000001314	224	3.94687	286	4.25171	438	6.83451	192	2.7475	177	3.26921	114	1.47129	400	6.64872	322	6.03903	115	1.39804	2	133509648	133612230	+	6580	ITGA4
ENSBGRG00000001315	12	0.698429	0	0	0	0	12	0.567223	0	0	0	0	0	0	0	0	0	0	5	111086120	111114455	+	1992	SCNN1A
ENSBGRG00000001316	458	20.2905	308	11.5125	359	14.0848	314	11.2976	349	16.2075	366	11.8767	416	17.3858	366	17.259	333	10.1786	7	55387870	55421039	+	2617	TSTD2
ENSBGRG00000001317	1233	52.8868	1106	40.0251	1416	53.7869	841	29.2962	887	39.8816	1024	32.1716	1273	51.5094	628	28.6715	566	16.7501	1	139446585	139484348	-	2703	SLC25A36
ENSBGRG00000001318	630	61.1739	754	61.7718	455	39.1261	546	43.0577	159	16.1841	297	21.1237	598	54.7773	349	36.071	435	29.1429	7	10296387	10305480	+	1194	-
ENSBGRG00000001319	0	0	0	0	0	0	0	0	0	0	0	0	0	0	0	0	0	0	8	14060808	14061947	-	933	-
ENSBGRG00000001320	4237	515.461	10576	1085.55	7304	786.914	12530	1238	3120	397.884	41462	3694.67	14136	1622.32	3756	486.373	4337	364.036	5	47687120	47689881	+	953	MYL6B
ENSBGRG00000001321	292	8.27934	458	10.9565	564	14.1619	462	10.6387	545	16.1985	416	8.63962	325	8.69301	357	10.7743	693	13.557	5	6886764	6994778	-	4089	PLBD1
ENSBGRG00000001322	66	5.32497	14	0.953003	49	3.50105	106	6.94562	49	4.14414	232	13.7104	58	4.41443	23	1.97519	570	31.7297	8	6093480	6109977	-	1437	TMEM161A
ENSBGRG00000001323	18	0.880179	64	2.64041	25	1.0826	9	0.357415	29	1.48649	25	0.89542	25	1.15322	0	0	0	0	5	18384663	18481502	-	2371	DNAI7
ENSBGRG00000001324	4	0.904009	0	0	0	0	0	0	0	0	0	0	0	0	0	0	0	0	1	90585523	90587095	+	513	-
ENSBGRG00000001325	0	0	0	0	0	0	0	0	0	0	0	0	0	0	0	0	0	0	8	14117009	14118908	-	1011	-
ENSBGRG00000001326	1	0.201283	0	0	0	0	0	0	0	0	0	0	0	0	0	0	0	0	4	53661307	53661882	-	576	-
ENSBGRG00000001327	0	0	0	0	0	0	0	0	0	0	0	0	0	0	1	0.0741179	21	1.00891	2	57068135	57069799	+	1665	-
ENSBGRG00000001328	0	0	13	0.689239	0	0	0	0	0	0	0	0	0	0	0	0	0	0	5	80341481	80346765	-	1845	KRT1
ENSBGRG00000001329	138	11.3553	251	17.4255	275	20.0392	98	6.54903	201	17.3373	151	9.1009	401	31.127	219	19.181	130	7.3804	2	57106814	57124712	+	1409	STK17B
ENSBGRG00000001331	0	0	0	0	0	0	0	0	0	0	0	0	0	0	0	0	0	0	8	81901896	81902945	-	1050	-
ENSBGRG00000001333	1526	50.1341	1285	35.6184	1047	30.4617	996	26.5748	745	25.6566	1008	24.2564	985	30.5273	835	29.1993	974	22.0778	3	38278717	38356151	-	3529	SORT1
ENSBGRG00000001334	0	0	0	0	0	0	0	0	0	0	0	0	0	0	0	0	0	0	8	14227883	14229725	+	1047	-
ENSBGRG00000001335	0	0	0	0	0	0	0	0	0	0	0	0	0	0	0	0	0	0	1	90610196	90619594	+	933	-
ENSBGRG00000001338	2190	131.015	2838	143.246	1914	101.402	2766	134.388	2447	153.453	2514	110.162	2793	157.624	1557	99.1452	3493	144.176	7	55422976	55526154	-	1938	TMOD1
ENSBGRG00000001339	174	10.1578	96	4.72841	32	1.65436	96	4.55149	126	7.71057	256	10.9466	38	2.09271	68	4.22539	161	6.48477	3	99875904	100072514	+	1986	SSBP3
ENSBGRG00000001340	913	44.2712	1246	50.9755	1079	46.3341	887	34.9306	893	45.3907	882	31.3262	708	32.386	778	40.1548	840	28.1027	7	10311955	10343186	-	2391	SMU1
ENSBGRG00000001342	0	0	0	0	0	0	0	0	0	0	0	0	0	0	0	0	0	0	2	133612168	133764040	-	2345	CERKL
ENSBGRG00000001344	0	0	0	0	0	0	0	0	0	0	0	0	0	0	0	0	0	0	5	80357356	80369784	-	1776	KRT77
ENSBGRG00000001345	41	3.11705	78	5.0032	32	2.15446	132	8.15016	22	1.75327	132	7.35059	122	8.74971	49	3.96518	79	4.14386	2	82860277	82866263	-	1525	CXCR4
ENSBGRG00000001346	0	0	0	0	0	0	0	0	0	0	0	0	0	0	0	0	0	0	3	9217322	9218251	-	303	APOA2
ENSBGRG00000001347	66	3.81836	87	4.24663	13	0.666047	142	6.67195	12	0.727744	196	8.30571	75	4.09324	52	3.20216	349	13.9308	5	76714958	76728523	-	2004	LMBR1L
ENSBGRG00000001348	0	0	0	0	0	0	1	0.0663559	0	0	0	0	0	0	0	0	0	0	7	111587546	111588964	+	1419	-
ENSBGRG00000001349	6	0.497593	0	0	0	0	0	0	0	0	0	0	0	0	0	0	0	0	1	139539510	139540907	+	1398	-
ENSBGRG00000001350	188	14.2741	243	15.5665	238	16.0028	298	18.3755	218	17.3505	214	11.9013	136	9.741	171	13.8196	138	7.22916	8	82473282	82475008	-	1527	-
ENSBGRG00000001351	111	8.85702	113	7.60739	120	8.47959	121	7.84119	25	2.09108	336	19.6378	67	5.04328	156	13.2494	339	18.663	5	125670495	125690378	+	1453	TRMU
ENSBGRG00000001352	23	2.44194	0	0	0	0	0	0	0	0	20	1.55534	0	0	0	0	14	1.02554	8	19392714	19393805	+	1092	PRR22
ENSBGRG00000001353	0	0	0	0	0	0	0	0	0	0	0	0	0	0	0	0	0	0	2	83257773	83259011	+	1239	-
ENSBGRG00000001354	20	0.627716	37	0.979778	33	0.917226	10	0.254897	31	1.01991	71	1.63222	31	0.917843	0	0	19	0.411438	4	53689893	53797076	-	3694	OSBPL3
ENSBGRG00000001355	82	1.85033	170	3.23652	174	3.47708	71	1.30115	116	2.74384	104	1.71893	258	5.49199	224	5.38011	121	1.88382	5	83903636	84079020	-	5138	PLXNC1
ENSBGRG00000001356	166	66.826	200	67.9298	82	29.2335	255	83.37	156	65.8305	309	91.1138	268	101.776	122	52.2762	421	116.933	8	22412374	22412923	+	288	TIMM13
ENSBGRG00000001357	0	0	0	0	0	0	0	0	0	0	0	0	0	0	0	0	0	0	1	139719831	139754361	-	2178	TRIM42
ENSBGRG00000001358	0	0	0	0	0	0	0	0	0	0	0	0	0	0	0	0	0	0	3	21367058	21367222	+	165	CTXND2
ENSBGRG00000001359	0	0	0	0	12	0.907279	11	0.762702	0	0	0	0	82	6.60416	0	0	0	0	7	94938049	95185798	+	1358	SH3GL2
ENSBGRG00000001362	31	19.3232	90	47.3318	20	11.0402	101	51.1294	19	12.4147	82	37.4386	46	27.0488	1	0.663474	141	60.6393	1	90614243	90615109	+	186	-
ENSBGRG00000001363	351	12.0577	463	13.4193	537	16.3365	306	8.53709	595	21.4259	401	10.0899	520	16.8513	431	15.7594	269	6.37568	7	55533770	55619330	-	3375	TDRD7
ENSBGRG00000001365	0	0	6	0.194342	0	0	0	0	0	0	0	0	0	0	0	0	0	0	8	49745725	49818236	-	3020	CDKL3
ENSBGRG00000001367	664	24.6269	721	22.5616	446	14.6489	562	16.9281	507	19.7113	480	13.0398	510	17.8437	589	23.2522	93	2.37981	7	111594438	111605438	-	3126	TOPORS
ENSBGRG00000001368	0	0	0	0	0	0	0	0	0	0	0	0	0	0	1	0.104937	0	0	3	55386728	55387903	-	1176	-
ENSBGRG00000001369	411	35.3756	554	40.2314	444	33.8435	767	53.6154	347	31.3081	676	42.6184	561	45.5511	465	42.6013	1062	63.0674	3	38359689	38386295	-	1347	PSMA5
ENSBGRG00000001371	0	0	0	0	0	0	0	0	0	0	0	0	0	0	0	0	0	0	8	14296839	14297847	+	894	-
ENSBGRG00000001372	332	26.008	430	28.4204	366	25.3909	550	34.9915	315	25.8669	1001	57.4369	615	45.4483	229	19.0946	749	40.4825	5	47689773	47693333	+	1480	MYL6
ENSBGRG00000001374	10	0.194921	0	0	5	0.0863094	0	0	0	0	0	0	0	0	0	0	0	0	2	83764029	84786539	+	5948	THSD7B
ENSBGRG00000001375	13	0.526628	13	0.444321	44	1.57849	136	4.47436	16	0.679431	56	1.66164	29	1.10824	21	0.905496	56	1.56519	1	139859022	140662406	-	2862	CLSTN2
ENSBGRG00000001376	63	0.521168	66	0.460653	117	0.857141	12	0.0806214	31	0.268821	20	0.121187	37	0.288744	22	0.193717	24	0.136983	2	57176557	57463296	+	14015	DNAH7
ENSBGRG00000001377	941	23.2273	955	19.8887	948	20.7227	984	19.7259	829	21.4501	825	14.916	627	14.5999	785	20.6246	579	9.86065	3	21387922	21420544	+	4697	SETDB1
ENSBGRG00000001378	109	11.8996	47	4.32909	48	4.64062	147	13.0333	83	9.49837	364	29.1069	109	11.2255	54	6.27489	129	9.71657	3	9221362	9224074	+	1062	TOMM40L
ENSBGRG00000001379	421	11.1541	428	9.5673	313	7.34389	462	9.94092	236	6.55436	703	13.6426	358	8.94766	234	6.59896	1181	21.5884	2	33264942	33278348	-	4376	CTDSP1
ENSBGRG00000001380	364	34.82	325	26.2303	193	16.3499	213	16.5478	315	31.5866	346	24.2433	167	15.0702	228	23.215	283	18.678	1	90629419	90686992	+	1212	PARL
ENSBGRG00000001381	0	0	15	1.33147	0	0	5	0.427219	2	0.220569	9	0.693552	15	1.48872	7	0.783887	1	0.0725882	8	84708455	84709935	+	1102	-
ENSBGRG00000001382	0	0	0	0	0	0	0	0	1	0.112531	0	0	0	0	0	0	0	0	7	55630140	55631824	+	1080	-
ENSBGRG00000001383	0	0	0	0	0	0	0	0	0	0	0	0	0	0	0	0	0	0	5	80411733	80412631	+	336	-
ENSBGRG00000001384	0	0	0	0	0	0	12	2.8533	0	0	0	0	0	0	0	0	20	4.04001	7	111605292	111606137	+	396	-
ENSBGRG00000001385	1	0.0644106	0	0	0	0	0	0	0	0	0	0	0	0	0	0	0	0	3	55443051	55455171	+	1800	GFI1
ENSBGRG00000001386	0	0	0	0	0	0	0	0	0	0	0	0	0	0	0	0	0	0	8	14316805	14362036	+	957	-
ENSBGRG00000001387	0	0	0	0	0	0	0	0	0	0	0	0	0	0	0	0	0	0	8	22423758	22458070	-	3710	TMPRSS9
ENSBGRG00000001388	156	7.55493	118	4.82149	132	5.66121	92	3.61848	88	4.46739	58	2.05742	40	1.82743	127	6.54661	233	7.78537	8	19399712	19437543	-	2394	CATSPERD
ENSBGRG00000001389	0	0	23	1.03393	0	0	0	0	0	0	0	0	0	0	0	0	0	0	8	84924619	85029746	-	2176	-
ENSBGRG00000001391	400	36.5163	302	23.2609	287	23.2026	515	38.1826	148	14.1629	318	21.2638	349	30.0556	227	22.0576	250	15.7465	7	10373280	10434142	-	1270	B4GALT1
ENSBGRG00000001392	250	31.471	355	37.7044	373	41.5823	186	19.0158	240	31.6699	379	34.946	302	35.8634	348	46.6291	874	75.9101	8	49781863	49798642	+	921	UBE2B
ENSBGRG00000001394	1226	21.3042	1014	14.8664	982	15.1117	836	11.7981	779	14.1898	778	9.90243	910	14.9173	668	12.3554	953	11.4257	1	63067523	63088229	-	6672	USF3
ENSBGRG00000001395	0	0	0	0	0	0	0	0	0	0	0	0	0	0	0	0	0	0	5	80416110	80424375	-	1791	KRT76
ENSBGRG00000001399	127	5.72483	99	3.76519	154	6.14765	126	4.61277	107	5.05601	52	1.71692	68	2.89162	265	12.7149	33	1.02634	8	14387963	14402243	-	2572	ZNF699
ENSBGRG00000001400	0	0	0	0	0	0	0	0	0	0	0	0	0	0	0	0	0	0	3	108177762	108186287	+	1312	-
ENSBGRG00000001401	25	2.03117	3	0.205646	15	1.07926	30	1.97952	9	0.766503	25	1.48777	4	0.306577	23	1.98903	2	0.112112	8	49815008	49818850	-	1427	CDKN2AIPNL
ENSBGRG00000001402	670	60.4508	937	71.3279	330	26.3676	550	40.3015	675	63.8405	1238	81.8156	609	51.8344	833	79.998	828	51.5436	7	111606655	111624149	-	1285	-
ENSBGRG00000001403	15	3.00361	0	0	6	1.06398	18	2.92722	0	0	1	0.146669	0	0	0	0	106	14.6445	1	90692008	90698654	+	579	MAP6D1
ENSBGRG00000001404	5278	26.572	7020	29.8185	7251	32.3282	7507	30.694	4940	26.0704	6569	24.2238	5308	25.2092	6175	33.0902	6030	20.9455	3	116231746	116613731	-	23029	MACF1
ENSBGRG00000001405	0	0	0	0	0	0	0	0	0	0	0	0	0	0	0	0	0	0	8	85240851	85242442	-	969	-
ENSBGRG00000001406	2277	175.644	1294	84.2167	1195	81.6335	2929	183.494	1434	115.954	4735	267.534	2971	216.196	1391	114.21	6040	321.459	3	38420799	38435409	+	1503	SYPL2
ENSBGRG00000001407	17	0.216471	0	0	16	0.180426	39	0.403317	0	0	28	0.261154	18	0.21622	0	0	16	0.140568	5	125698892	125870847	-	9105	CELSR1
ENSBGRG00000001410	3730	847.947	4284	821.679	3305	665.366	2266	418.362	3385	806.648	2168	361	2525	541.496	3601	871.345	1298	203.588	1	63136555	63167919	-	510	-
ENSBGRG00000001411	643	19.7167	216	5.58818	145	3.9375	310	7.72	295	9.48223	254	5.70487	576	16.6617	48	1.56665	112	2.36951	4	98931122	99037108	-	3781	ITGB8
ENSBGRG00000001412	0	0	0	0	0	0	0	0	0	0	0	0	0	0	0	0	0	0	5	80443794	80450663	-	1848	KRT3
ENSBGRG00000001414	408	11.159	544	12.5533	585	14.1694	446	9.9068	511	14.6505	444	8.89484	351	9.05623	498	14.4978	169	3.18912	1	90704488	90793470	-	4239	YEATS2
ENSBGRG00000001416	0	0	0	0	0	0	0	0	0	0	0	0	0	0	0	0	0	0	8	85535797	85536156	-	360	-
ENSBGRG00000001417	10	0.463571	50	1.9556	33	1.35475	61	2.29656	8	0.388751	90	3.05596	40	1.74924	18	0.88817	153	4.89357	8	22493809	22511558	-	2501	SPPL2B
ENSBGRG00000001418	0	0	0	0	0	0	0	0	0	0	0	0	0	0	0	0	0	0	7	10540222	10547988	+	261	SPINK4
ENSBGRG00000001419	501	49.9875	358	30.137	637	56.285	317	25.6871	355	37.1294	408	29.8176	621	58.4506	249	26.4442	344	23.681	3	21417577	21424231	-	1162	CERS2
ENSBGRG00000001420	0	0	0	0	0	0	0	0	0	0	0	0	0	0	0	0	0	0	3	9224792	9230221	-	1242	NR1I3
ENSBGRG00000001421	0	0	0	0	0	0	0	0	0	0	0	0	0	0	0	0	0	0	8	85543173	85544386	+	219	-
ENSBGRG00000001422	215	6.27882	389	9.58478	368	9.51736	336	7.96913	200	6.12258	81	1.73266	179	4.93136	301	9.35649	106	2.13581	3	55496948	55631643	-	3970	RPAP2
ENSBGRG00000001423	82	3.74439	47	1.81075	14	0.566141	178	6.60115	26	1.24453	164	5.48529	135	5.81534	32	1.55534	444	13.9884	3	38439325	38450286	+	2539	ATXN7L2
ENSBGRG00000001424	712	16.3333	491	9.50319	317	6.43996	654	12.1844	400	9.61878	964	16.198	743	16.0789	429	10.4751	975	15.4318	8	19442686	19463297	+	5054	LONP1
ENSBGRG00000001425	0	0	0	0	0	0	0	0	0	0	0	0	0	0	0	0	0	0	7	111814966	111815673	+	708	TMEM215
ENSBGRG00000001426	93	4.32158	143	5.60646	45	1.85183	86	3.24556	38	1.85101	89	3.02927	68	2.98086	218	10.7826	54	1.73129	8	14417009	14440541	+	2495	-
ENSBGRG00000001427	837	23.6455	649	15.4689	810	20.2645	773	17.7351	648	19.1895	430	8.89773	409	10.8998	806	24.2362	514	10.0185	4	18222445	18446764	+	4104	HIPK2
ENSBGRG00000001428	213	5.41677	114	2.44601	51	1.14858	136	2.80887	53	1.41287	109	2.03037	104	2.49498	113	3.05876	190	3.33374	1	141043069	141171496	+	4559	NMNAT3
ENSBGRG00000001429	201	53.3267	327	73.1963	214	50.2796	167	35.983	189	52.5625	284	55.1893	199	49.8053	157	44.3359	237	43.3825	4	53994518	54029641	-	437	-
ENSBGRG00000001430	15	7.52852	27	11.4334	34	15.1121	50	20.3807	21	11.0485	82	30.1453	21	9.94286	0	0	3	1.03886	1	90818289	90819449	+	231	-
ENSBGRG00000001431	0	0	4	0.479505	1	0.125826	0	0	0	0	1	0.104071	3	0.402101	0	0	0	0	2	83894772	83895587	-	816	-
ENSBGRG00000001432	2	0.348166	62	9.10627	24	3.69995	4	0.56552	10	1.82482	21	2.67771	1	0.164221	13	2.40883	35	4.20379	7	111966858	111967523	+	666	-
ENSBGRG00000001434	0	0	0	0	0	0	0	0	0	0	10	0.583654	56	4.20948	0	0	0	0	5	80464626	80470539	-	1455	KRT4
ENSBGRG00000001435	0	0	0	0	9	0.834746	0	0	0	0	0	0	0	0	0	0	0	0	8	6118544	6123509	-	1107	MEF2B
ENSBGRG00000001436	379	37.3013	243	20.1783	298	25.9735	538	43.003	337	34.768	819	59.0414	368	34.167	404	42.3227	477	32.3907	7	10553316	10564991	-	1178	BAG1
ENSBGRG00000001437	0	0	0	0	0	0	0	0	0	0	0	0	0	0	0	0	0	0	7	55756022	55807387	-	2217	-
ENSBGRG00000001439	7	0.339998	119	4.87661	0	0	0	0	18	0.916464	18	0.640381	57	2.61172	37	1.91287	26	0.871302	2	33279619	33290646	-	2387	SLC11A1
ENSBGRG00000001440	31	3.46254	0	0	0	0	41	3.71919	9	1.05376	34	2.78163	0	0	73	8.67886	0	0	3	21436801	21445889	+	1038	ANXA9
ENSBGRG00000001442	2459	158.122	2733	148.275	3519	200.393	2339	122.151	2849	192.04	3040	143.185	2288	138.792	2833	193.905	2250	99.8239	1	90850043	90875091	-	1803	KLHL24
ENSBGRG00000001443	56	5.03692	26	1.97307	34	2.70823	63	4.60203	52	4.90282	20	1.31764	0	0	75	7.18035	29	1.79967	2	85134788	85178496	+	1289	HNMT
ENSBGRG00000001444	147	12.5317	130	9.35034	62	4.68071	129	8.93126	119	10.6342	291	18.1707	27	2.17134	26	2.35924	386	22.7037	8	86165299	86166771	+	1360	-
ENSBGRG00000001445	18	3.26589	126	19.2882	32	5.14172	58	8.54652	15	2.85289	137	18.207	63	10.7831	43	8.30433	73	9.13839	7	111967711	111968502	+	639	-
ENSBGRG00000001446	0	0	0	0	12	0.929174	0	0	0	0	0	0	0	0	0	0	0	0	2	57393863	57395188	-	1326	-
ENSBGRG00000001447	47	3.06304	12	0.659824	52	3.00114	28	1.48199	55	3.75735	10	0.477356	0	0	78	5.41073	0	0	4	54039061	54080047	-	1779	C7orf31
ENSBGRG00000001448	453	9.13717	311	5.29257	260	4.64425	269	4.40654	116	2.45266	235	3.47192	163	3.10152	139	2.98425	415	5.77536	8	49921040	49976532	+	5748	JADE2
ENSBGRG00000001449	179	14.5025	405	27.6846	250	17.9374	309	20.332	144	12.2298	295	17.5066	161	12.3052	311	26.8199	330	18.4468	5	111126664	111133847	+	1431	TNFRSF1A
ENSBGRG00000001450	0	0	0	0	0	0	0	0	0	0	0	0	0	0	0	0	0	0	2	133782730	133783800	-	1071	NEUROD1
ENSBGRG00000001451	129	13.9777	249	22.7635	268	25.7164	196	17.2478	137	15.5608	103	8.1747	79	8.07509	139	16.0313	60	4.48554	7	10564215	10579883	+	1070	CHMP5
ENSBGRG00000001452	6972	228.083	7413	204.608	4646	134.6	7136	189.593	3608	123.728	7324	175.498	5955	183.777	5073	176.648	6245	140.957	5	76741464	76797276	-	3544	TUBA1B
ENSBGRG00000001453	0	0	0	0	0	0	0	0	0	0	0	0	0	0	0	0	0	0	5	6952317	6952992	+	267	-
ENSBGRG00000001454	191	11.8864	173	9.08356	167	9.20371	123	6.21662	273	17.8092	128	5.83466	147	8.62995	310	20.5346	97	4.16492	8	14529402	14531264	+	1863	-
ENSBGRG00000001455	763	32.8853	1879	68.3278	1085	41.413	2198	76.9374	811	36.6407	1696	53.5417	978	39.764	671	30.7827	2692	80.0517	7	111971289	111988863	-	2690	-
ENSBGRG00000001456	362	13.7022	570	18.2033	755	25.3081	544	16.723	400	15.8711	276	7.6521	267	9.53385	395	15.9143	189	4.93586	2	57466305	57522228	-	3063	SLC39A10
ENSBGRG00000001457	116	6.67773	213	10.3453	139	7.08622	188	8.78942	192	11.5861	169	7.126	318	17.2692	59	3.61518	362	14.3779	3	108198133	108227982	-	2014	CYP4B1
ENSBGRG00000001458	120	3.33159	129	3.02171	201	4.94191	179	4.03603	209	6.08249	149	3.03001	143	3.74524	143	4.22584	91	1.74313	6	56539867	56671602	-	4176	ATP10D
ENSBGRG00000001459	30	1.86397	26	1.36297	43	2.36601	32	1.61473	34	2.21443	31	1.41081	0	0	0	0	17	0.728761	1	90950654	91012078	+	1866	KLHL6
ENSBGRG00000001460	1	0.0829322	0	0	0	0	0	0	0	0	0	0	0	0	0	0	1	0.057219	2	85237687	85239084	+	1398	-
ENSBGRG00000001461	0	0	0	0	0	0	0	0	0	0	0	0	0	0	0	0	0	0	5	80485070	80495143	-	1608	KRT79
ENSBGRG00000001462	3	0.209276	0	0	35	2.1622	20	1.13308	0	0	51	2.6059	30	1.97421	65	4.82636	40	1.9252	5	6971703	6974388	-	1662	-
ENSBGRG00000001463	60	21.4702	71	21.4356	73	23.1333	34	9.88089	43	16.1294	18	4.71787	34	11.4772	67	25.5192	59	14.5665	8	14565941	14573898	+	324	-
ENSBGRG00000001464	5	2.76046	0	0	9	4.4003	0	0	7	4.05111	0	0	0	0	0	0	0	0	3	9244152	9275267	+	210	PCP4L1
ENSBGRG00000001465	0	0	0	0	0	0	0	0	0	0	3	0.102686	0	0	0	0	0	0	2	85435299	85498931	-	2481	-
ENSBGRG00000001466	658	24.2569	410	12.7522	268	8.7493	554	16.5864	405	15.6506	420	11.3409	386	13.4236	280	10.9869	834	21.2126	3	21443339	21457892	-	3145	MINDY1
ENSBGRG00000001467	682	17.2945	908	19.4269	868	19.4927	657	13.5307	892	23.7112	629	11.6832	584	13.9705	664	17.9225	676	11.8274	2	133972677	134077891	+	4572	ITPRID2
ENSBGRG00000001470	78	8.39671	1	0.0908254	7	0.667331	114	9.9667	14	1.57982	36	2.83861	31	3.14811	70	8.02083	126	9.35842	3	9298222	9303260	-	1077	MPZ
ENSBGRG00000001471	0	0	0	0	0	0	0	0	0	0	0	0	0	0	0	0	0	0	2	85733018	85734652	+	1635	-
ENSBGRG00000001473	5	0.15579	0	0	0	0	0	0	17	0.555245	19	0.433623	15	0.440895	0	0	0	0	5	7046794	7120710	-	3721	GUCY2C
ENSBGRG00000001474	0	0	0	0	0	0	0	0	0	0	0	0	0	0	0	0	0	0	4	54099686	54103040	-	591	NPVF
ENSBGRG00000001476	0	0	0	0	0	0	0	0	0	0	0	0	0	0	0	0	0	0	7	112008979	112010010	+	1032	-
ENSBGRG00000001477	0	0	0	0	0	0	0	0	0	0	0	0	0	0	0	0	0	0	2	60536816	60538314	-	1499	-
ENSBGRG00000001478	0	0	0	0	0	0	0	0	0	0	0	0	0	0	0	0	0	0	5	80501897	80509788	-	1548	KRT78
ENSBGRG00000001479	281	7.76428	307	7.15692	397	9.71436	206	4.62268	334	9.674	197	3.98703	279	7.27231	354	10.4113	191	3.64121	1	63203703	63238989	+	4196	ATP6V1A
ENSBGRG00000001480	221	20.1435	372	28.6074	205	16.5473	365	27.0189	254	24.2684	637	42.5276	360	30.9542	326	31.6277	1433	90.117	3	100082848	100105187	-	1272	MRPL37
ENSBGRG00000001481	121	2.55252	51	0.907709	17	0.317586	158	2.7069	15	0.331696	160	2.47225	104	2.06962	8	0.179631	98	1.42635	7	96016949	96551281	+	5496	ADAMTSL1
ENSBGRG00000001482	419	18.8362	477	18.0921	487	19.3882	301	10.9895	377	17.7658	363	11.9529	577	24.4697	406	19.4273	268	8.31249	2	85780120	85801722	+	2579	SPOPL
ENSBGRG00000001483	99	2.889	24	0.590902	26	0.671915	62	1.46938	8	0.244718	12	0.256496	52	1.43149	0	0	10	0.20134	6	100269496	100482971	-	3973	TSPAN5
ENSBGRG00000001484	1028	26.9589	1249	27.6353	1211	28.1244	1050	22.363	1099	30.2115	1001	19.2279	1369	33.8678	1339	37.3764	704	12.738	6	111495961	111582946	+	4421	SEC24B
ENSBGRG00000001485	925	19.1063	830	14.4646	638	11.6704	769	12.9001	653	14.1388	524	7.92783	714	13.9126	499	10.9709	760	10.8309	7	10591854	10666783	+	5613	NFX1
ENSBGRG00000001489	0	0	0	0	0	0	0	0	0	0	0	0	0	0	0	0	0	0	8	14590800	14591876	+	1077	-
ENSBGRG00000001491	872	23.5114	779	17.7212	704	16.8098	821	17.9778	525	14.8384	642	12.679	527	13.4044	486	13.9478	917	17.0588	5	47695293	47716535	-	4300	SMARCC2
ENSBGRG00000001492	25	1.53359	0	0	18	0.977845	27	1.34513	24	1.54328	21	0.943574	68	3.93506	15	0.979414	135	5.71373	7	112031061	112052642	+	1890	SCARA3
ENSBGRG00000001494	96	10.2772	272	24.5676	125	11.8506	88	7.65097	126	14.1396	210	16.4668	257	25.9543	167	19.0294	166	12.261	3	131622618	131640771	+	1083	PPP1R7
ENSBGRG00000001495	41	3.13349	51	3.28857	0	0	17	1.05518	15	1.20171	39	2.18322	38	2.73969	0	0	7	0.369114	2	61221969	61535085	+	1517	TMEFF2
ENSBGRG00000001496	0	0	0	0	0	0	1	0.00968216	0	0	0	0	32	0.359885	0	0	0	0	4	99177453	99688892	+	9725	MACC1
ENSBGRG00000001497	286	14.7963	227	9.90848	432	19.7925	407	17.1007	261	14.1545	255	9.6631	439	21.4253	112	6.16756	193	6.88911	7	32433575	32694006	+	2241	SLC44A1
ENSBGRG00000001498	28	0.834524	33	0.829827	0	0	4	0.0968216	0	0	0	0	0	0	3	0.0951719	0	0	4	55088769	55131116	+	3890	NFE2L3
ENSBGRG00000001499	212	18.0463	189	13.574	249	18.7707	215	14.8636	186	16.5971	176	10.9737	233	18.7104	69	6.25186	395	23.1989	3	21459450	21478472	+	1362	PRUNE1
ENSBGRG00000001500	115	2.93355	70	1.50656	48	1.08434	46	0.952985	58	1.55092	19	0.355008	109	2.62299	123	3.33971	175	3.08001	3	38451834	38460979	+	4545	CYB561D1
ENSBGRG00000001501	0	0	0	0	0	0	0	0	0	0	0	0	0	0	0	0	0	0	1	141217812	141255888	+	1279	RBP2
ENSBGRG00000001502	90	3.09722	0	0	19	0.579044	64	1.78871	24	0.865776	57	1.43679	47	1.52581	60	2.1978	23	0.546103	1	91073258	91348460	+	3369	MCF2L2
ENSBGRG00000001503	78	1.79145	32	0.620088	69	1.40342	84	1.56683	103	2.47978	187	3.14587	51	1.10498	50	1.22233	114	1.80648	8	6147290	6160461	-	5048	-
ENSBGRG00000001504	114	5.56274	101	4.15813	13	0.561767	179	7.09363	71	3.63168	142	5.07528	150	6.90476	58	3.01244	188	6.32935	8	19461348	19468516	-	2376	HSD11B1L
ENSBGRG00000001505	0	0	0	0	0	0	0	0	0	0	0	0	0	0	0	0	0	0	7	55830682	55846313	+	1550	IGFBPL1
ENSBGRG00000001506	22	1.21983	10	0.467809	0	0	6	0.270184	11	0.639343	70	2.84291	43	2.24915	0	0	69	2.63963	8	14649148	14661407	-	2091	FBXL12
ENSBGRG00000001507	0	0	0	0	0	0	0	0	0	0	0	0	0	0	0	0	0	0	1	87073783	87244562	-	1787	RTP1
ENSBGRG00000001508	0	0	0	0	0	0	0	0	0	0	0	0	0	0	0	0	0	0	5	76783110	76783547	-	261	-
ENSBGRG00000001509	98	7.55957	75	4.88119	11	0.751438	38	2.3806	13	1.05119	100	5.65014	0	0	91	7.4717	41	2.18209	5	80549320	80579303	-	1503	-
ENSBGRG00000001510	79	0.920522	39	0.383411	0	0	53	0.501551	52	0.635149	0	0	11	0.120913	0	0	43	0.345695	8	86315751	87476692	+	9950	TENM2
ENSBGRG00000001511	263	274.703	263	231.769	255	235.872	229	194.256	327	358.031	317	242.524	87	85.7235	169	187.889	148	106.656	5	18487605	18492866	+	111	-
ENSBGRG00000001512	0	0	0	0	0	0	5	0.377845	0	0	0	0	0	0	0	0	13	0.83459	2	85896141	86036031	-	1246	NXPH2
ENSBGRG00000001514	0	0	0	0	0	0	0	0	0	0	0	0	0	0	0	0	0	0	5	76784258	76784695	-	261	-
ENSBGRG00000001515	6015	391.783	6266	344.345	4220	243.417	2926	154.781	3649	249.143	2703	128.957	3685	226.423	4449	308.446	2060	92.5753	4	55136632	55147274	-	1780	-
ENSBGRG00000001516	141	7.66405	382	17.5184	276	13.2855	205	9.04951	288	16.4096	216	8.59966	215	11.0243	205	11.8604	132	4.95029	7	112129108	112160180	-	2133	CCDC25
ENSBGRG00000001517	0	0	0	0	0	0	0	0	0	0	0	0	0	0	0	0	0	0	2	86914408	86915352	-	747	-
ENSBGRG00000001518	11	0.473046	0	0	0	0	28	0.977913	33	1.48761	41	1.29146	31	1.25761	0	0	60	1.78024	3	100104900	100131681	+	2696	CYB5RL
ENSBGRG00000001519	10	0.487959	24	0.98807	0	0	12	0.475551	0	0	15	0.536121	0	0	0	0	0	0	5	111134925	111154260	-	2376	PLEKHG6
ENSBGRG00000001520	665	26.2243	623	20.7283	679	23.7127	795	25.4614	445	18.3953	663	19.1507	617	22.9531	613	25.7306	777	21.1408	1	141317916	141353901	+	2940	COPB2
ENSBGRG00000001521	0	0	0	0	28	1.82531	50	2.98918	21	1.62044	15	0.808777	68	4.72207	34	2.66401	40	2.03155	1	87201887	87244562	-	1575	ST6GAL1
ENSBGRG00000001522	0	0	0	0	0	0	0	0	0	0	0	0	0	0	0	0	0	0	7	55857618	55859421	-	1524	ALDH1B1
ENSBGRG00000001523	7	2.6012	12	3.76227	0	0	0	0	22	8.56966	0	0	0	0	37	14.6347	0	0	8	22511578	22516162	+	312	LSM7
ENSBGRG00000001524	384	31.7551	484	33.7692	262	19.1872	427	28.6775	366	31.727	335	20.2915	414	32.2966	278	24.47	340	19.399	5	18493407	18544398	-	1402	KRAS
ENSBGRG00000001525	1448	96.8166	798	45.017	730	43.2248	1765	95.8424	817	57.2622	4102	200.893	1573	99.2164	1038	73.8729	3933	181.436	3	9306369	9341811	+	1734	SDHC
ENSBGRG00000001526	377	196.888	443	195.197	322	148.923	380	161.173	205	112.227	723	276.569	455	224.162	433	240.698	339	122.15	8	14669229	14670205	+	222	-
ENSBGRG00000001528	612	20.7349	569	16.265	534	16.0221	584	16.0692	380	13.4958	425	10.547	516	16.492	489	17.6346	340	7.94779	5	76850198	76908697	+	3422	TUBA1C
ENSBGRG00000001529	95	2.49812	140	3.10607	32	0.745194	150	3.20342	62	1.70902	127	2.44614	12	0.297677	185	5.17808	39	0.707575	1	63263377	63371109	+	4409	GRAMD1C
ENSBGRG00000001530	30	2.15768	26	1.57773	12	0.76432	0	0	9	0.678536	66	3.47694	0	0	0	0	0	0	3	21480536	21489900	+	1612	BNIPL
ENSBGRG00000001531	124	6.12025	237	9.86935	238	10.4029	161	6.45364	247	12.7794	174	6.29049	164	7.63598	104	5.46371	48	1.63458	6	56710733	56769744	+	2349	-
ENSBGRG00000001532	2765	74.6036	2638	60.0527	2006	47.9319	3248	71.1726	2136	60.4131	3030	59.8819	2853	72.6173	2001	57.467	3918	72.9368	3	131680733	131715634	-	4297	HDLBP
ENSBGRG00000001534	0	0	0	0	0	0	12	1.19189	0	0	0	0	6	0.692224	0	0	0	0	6	100488191	100489365	+	948	-
ENSBGRG00000001535	217	16.9762	55	3.63026	120	8.31366	251	15.9473	131	10.7428	424	24.2961	224	16.5312	107	8.9099	472	25.4766	3	38465275	38466756	-	1482	AMIGO1
ENSBGRG00000001536	177	36.1926	292	50.3759	353	63.9221	563	93.4948	220	47.1558	637	95.4058	262	50.5385	314	68.3414	971	136.988	5	117568386	117570089	+	567	H1-0
ENSBGRG00000001538	0	0	0	0	0	0	0	0	0	0	0	0	0	0	0	0	0	0	4	18477979	18500667	-	1803	CLEC2L
ENSBGRG00000001539	10	0.441841	0	0	14	0.547802	36	1.29182	11	0.509477	62	2.00653	0	0	0	0	35	1.06697	7	56167440	56322698	+	2624	SHB
ENSBGRG00000001540	153	7.75971	154	6.58973	195	8.75826	395	16.2698	180	9.56955	348	12.9277	362	17.3195	324	17.4906	152	5.31882	2	61672960	61685444	+	2286	CAVIN2
ENSBGRG00000001541	105	11.528	252	23.3432	125	12.1536	42	3.74496	87	10.0127	177	14.234	80	8.28571	91	10.6344	121	9.16577	1	141354707	141368108	-	1056	MRPS22
ENSBGRG00000001542	0	0	0	0	0	0	0	0	0	0	0	0	0	0	0	0	0	0	3	38505903	38507258	+	1356	GPR61
ENSBGRG00000001543	0	0	0	0	0	0	0	0	0	0	0	0	0	0	0	0	0	0	8	22540649	22542427	+	1779	LINGO3
ENSBGRG00000001544	8	2.9728	29	9.09215	0	0	3	0.905375	3	1.16859	64	17.4198	0	0	0	0	99	25.3821	5	7152030	7152341	-	312	-
ENSBGRG00000001545	0	0	0	0	0	0	0	0	0	0	0	0	0	0	0	0	0	0	5	80604732	80605735	-	90	-
ENSBGRG00000001546	0	0	0	0	0	0	0	0	6	0.590924	0	0	0	0	0	0	0	0	5	18835650	18867232	-	1234	LMNTD1
ENSBGRG00000001547	0	0	0	0	0	0	0	0	0	0	0	0	0	0	0	0	0	0	3	64804084	64805094	+	1011	-
ENSBGRG00000001548	96	11.4039	141	14.1316	90	9.46786	147	14.1817	104	12.9503	364	31.6716	131	14.68	118	14.92	552	45.2415	8	14677947	14689728	+	976	PIN1
ENSBGRG00000001549	23	1.32865	42	2.04703	89	4.55304	125	5.86442	35	2.11941	138	5.83916	68	3.70566	88	5.41094	144	5.73935	8	6160482	6165671	+	2007	RFXANK
ENSBGRG00000001550	314	16.5176	510	22.6351	465	21.6621	334	14.2691	377	20.7886	419	16.1444	327	16.2271	346	19.3732	288	10.4527	3	108310051	108350500	+	2204	EFCAB14
ENSBGRG00000001551	0	0	0	0	0	0	0	0	0	0	0	0	0	0	0	0	0	0	8	22550211	22558045	+	1312	PEAK3
ENSBGRG00000001553	29	8.62112	18	4.51472	20	5.26532	55	13.2788	41	12.7766	19	4.13721	0	0	59	18.6691	157	32.202	5	7154362	7154751	+	390	H2AJ
ENSBGRG00000001554	0	0	0	0	0	0	0	0	0	0	0	0	0	0	0	0	0	0	4	18541297	18558252	+	1269	KLRG2
ENSBGRG00000001555	362	22.662	334	17.6412	478	26.5	232	11.7953	172	11.2871	155	7.10737	355	20.9648	285	18.9907	136	5.87416	3	38511509	38560569	+	1852	GNAI3
ENSBGRG00000001556	0	0	0	0	0	0	0	0	0	0	0	0	4	0.476564	0	0	0	0	3	21490211	21494736	+	918	-
ENSBGRG00000001557	0	0	0	0	0	0	0	0	0	0	0	0	0	0	0	0	0	0	6	100565252	100566236	+	615	-
ENSBGRG00000001558	12	0.622214	7	0.306231	20	0.91837	37	1.55809	0	0	0	0	0	0	0	0	34	1.21634	6	111598740	111807559	+	2236	MCUB
ENSBGRG00000001560	847	15.8772	845	13.3641	520	8.63223	750	11.4178	609	11.9667	1009	13.8538	935	16.5339	417	8.32019	1415	18.3006	1	159342672	159385853	-	6185	MCM3AP
ENSBGRG00000001561	42	3.40283	9	0.615214	76	5.45297	56	3.68477	58	4.92588	51	3.02656	108	8.25445	90	7.7614	22	1.22979	2	61904267	62025819	-	1431	NABP1
ENSBGRG00000001562	39	2.55315	71	3.9216	4	0.2319	88	4.67871	32	2.19597	69	3.30864	155	9.57231	71	4.9474	132	5.96215	5	117571967	117579225	+	1771	GCAT
ENSBGRG00000001564	0	0	21	1.5205	0	0	0	0	0	0	0	0	0	0	0	0	0	0	5	80605125	80609628	+	1351	KRT18
ENSBGRG00000001565	1836	100.313	1171	53.9802	770	37.2567	1692	75.0788	949	54.3521	3717	148.753	1272	65.561	375	21.8084	2304	86.853	7	10679251	10697147	-	2122	-
ENSBGRG00000001566	8	0.425465	0	0	0	0	32	1.38215	0	0	0	0	0	0	0	0	12	0.440324	6	56774414	57264613	-	2180	GABRB1
ENSBGRG00000001569	4067	568.787	3998	471.749	4711	583.469	2640	299.855	4120	604.001	2800	286.828	2784	367.298	5913	880.218	1586	153.037	8	49997072	50021789	-	829	SAR1B
ENSBGRG00000001570	1905	104.132	2357	108.703	1980	95.8482	1879	83.4158	1516	86.8668	1954	78.2352	1261	65.0247	1871	108.86	1565	59.023	5	7173633	7188004	-	2121	-
ENSBGRG00000001572	0	0	0	0	0	0	0	0	0	0	0	0	0	0	0	0	0	0	5	76928881	76932441	+	1815	PRPH
ENSBGRG00000001573	0	0	0	0	0	0	0	0	0	0	0	0	0	0	0	0	0	0	3	100149932	100173592	+	1617	CDCP2
ENSBGRG00000001574	1417	81.8156	1018	49.5915	705	36.0483	1904	89.2823	552	33.4096	3092	130.766	1267	69.0107	511	31.4047	5730	228.265	8	22563704	22568600	-	2008	-
ENSBGRG00000001575	40	19.3232	92	37.4973	72	30.8021	127	49.8258	34	17.2172	126	44.5839	44	20.0514	197	101.296	46	15.3318	3	21499176	21500776	-	240	CDC42SE1
ENSBGRG00000001576	0	0	0	0	0	0	0	0	0	0	0	0	0	0	0	0	0	0	3	108356516	108358094	-	621	TEX38
ENSBGRG00000001577	551	49.0649	380	28.5493	544	42.899	425	30.7355	471	43.9648	315	20.5456	506	42.5053	571	54.1205	295	18.1242	4	18573662	18634103	-	1302	LUC7L2
ENSBGRG00000001578	0	0	0	0	0	0	0	0	0	0	0	0	7	1.04163	0	0	0	0	1	87375381	87376292	+	735	-
ENSBGRG00000001579	0	0	0	0	0	0	0	0	0	0	0	0	0	0	0	0	0	0	2	33301225	33308270	-	1170	CATIP
ENSBGRG00000001581	578	84.187	407	50.0155	291	37.5352	201	23.7763	376	57.4077	324	34.5661	418	57.4337	332	51.4709	243	24.4197	6	100735198	100774109	-	796	EIF4E
ENSBGRG00000001582	298	11.0312	522	16.3032	436	14.293	392	11.7849	362	14.047	304	8.24271	521	18.1936	349	13.7512	407	10.3949	3	65012131	65117619	+	3132	TTLL7
ENSBGRG00000001583	6	0.588524	0	0	0	0	0	0	0	0	0	0	0	0	0	0	0	0	7	32484963	32486144	-	1182	-
ENSBGRG00000001584	62	26.3305	154	55.1799	127	47.764	16	5.51848	43	19.1426	36	11.1985	41	16.4257	19	8.58871	98	28.7152	3	21509545	21509817	+	273	MLLT11
ENSBGRG00000001586	32	2.86934	51	3.85829	85	6.74963	76	5.53448	80	7.51946	125	8.20975	118	9.9813	11	1.04986	360	22.2716	1	159386713	159391262	+	1293	-
ENSBGRG00000001590	1	0.079356	820	54.9018	460	32.3271	128	8.24939	1	0.083185	13	0.755634	18	1.34749	35	2.95634	147	8.0485	1	87430394	87464579	-	1461	-
ENSBGRG00000001591	3	0.261714	0	0	0	0	0	0	1	0.0914472	1	0.0638989	0	0	1	0.0928565	0	0	7	32527756	32529084	-	1329	-
ENSBGRG00000001592	9	0.353473	0	0	9	0.31303	21	0.669831	7	0.288189	21	0.604117	0	0	0	0	0	0	7	112163381	112193205	+	2952	-
ENSBGRG00000001593	292	37.8683	378	41.3597	311	35.7176	232	24.435	214	29.0919	235	22.3228	318	38.9039	281	38.7888	270	24.1587	7	56357768	56358661	+	894	-
ENSBGRG00000001595	0	0	0	0	0	0	0	0	0	0	0	0	0	0	0	0	0	0	1	141682316	141683092	+	777	-
ENSBGRG00000001597	22	1.71185	50	3.28252	186	12.817	26	1.64304	59	4.81239	97	5.52846	57	4.18401	28	2.31904	64	3.43591	4	55149039	55159643	+	1490	-
ENSBGRG00000001598	804	89.0306	882	82.4034	619	60.702	603	54.2291	879	102.032	1010	81.9206	680	71.034	851	100.304	688	52.5641	3	108361850	108388427	+	1047	ATPAF1
ENSBGRG00000001600	0	0	0	0	0	0	6	0.279819	0	0	0	0	7	0.379198	17	1.03908	14	0.554676	8	14696570	14791707	-	2019	OLFM2
ENSBGRG00000001602	0	0	0	0	0	0	0	0	0	0	0	0	0	0	0	0	0	0	1	141708814	141710107	+	876	-
ENSBGRG00000001603	0	0	0	0	0	0	0	0	0	0	0	0	0	0	0	0	0	0	5	117583974	117585709	+	1122	GALR3
ENSBGRG00000001604	150	9.11471	104	5.33185	183	9.84764	168	8.29073	132	8.40796	149	6.63172	170	9.74483	147	9.50771	126	5.2825	7	56379038	56435511	-	1908	DCAF10
ENSBGRG00000001605	17	1.54464	0	0	0	0	20	1.47585	0	0	0	0	0	0	0	0	13	0.814968	5	7192840	7194169	-	1276	SMCO3
ENSBGRG00000001606	0	0	0	0	18	1.73533	0	0	0	0	0	0	0	0	0	0	0	0	3	38570522	38580155	-	1065	GNAT2
ENSBGRG00000001607	2	0.0876998	26	0.961911	0	0	16	0.569798	0	0	31	0.995677	8	0.330927	40	1.86696	62	1.87576	3	100213918	100260052	-	2644	TCEANC2
ENSBGRG00000001608	53	3.1415	115	5.75111	12	0.6299	40	1.92554	99	6.15123	55	2.38788	74	4.13777	36	2.27128	113	4.62123	4	99704262	99716111	+	1956	POLR1F
ENSBGRG00000001609	0	0	10	1.97614	1	0.207422	0	0	0	0	0	0	0	0	0	0	15	2.42401	1	141725827	141727147	-	495	-
ENSBGRG00000001610	198	6.64235	243	6.8779	90	2.67379	41	1.11705	52	1.82863	39	0.958317	42	1.32917	68	2.42813	27	0.624939	3	21516134	21537974	+	3456	GABPB2
ENSBGRG00000001611	233	13.4264	524	25.4757	559	28.5261	346	16.1924	238	14.3762	265	11.185	109	5.92519	152	9.32294	776	30.8519	5	19390232	19485177	+	2012	RASSF8
ENSBGRG00000001612	0	0	0	0	0	0	0	0	16	1.96616	0	0	20	2.21176	0	0	0	0	7	112200652	112234490	-	989	-
ENSBGRG00000001613	27	4.19057	58	7.59505	116	15.944	109	13.7394	45	7.32128	206	23.4188	76	11.1275	32	5.28648	169	18.0973	5	111232158	111274141	-	747	CD9
ENSBGRG00000001614	118	7.37908	139	7.33378	232	12.8481	87	4.41847	81	5.30971	90	4.12241	262	15.4559	74	4.9256	73	3.14964	3	55632650	55678966	+	1854	GLMN
ENSBGRG00000001615	609	10.5842	711	10.4256	420	6.46424	755	10.6566	497	9.05442	982	12.5008	587	9.6239	361	6.67811	1676	20.097	8	22623532	22688502	+	6671	DOT1L
ENSBGRG00000001616	0	0	0	0	19	0.55769	0	0	0	0	0	0	24	0.750404	0	0	0	0	5	76960222	76967788	+	3498	TROAP
ENSBGRG00000001617	0	0	0	0	0	0	0	0	0	0	0	0	0	0	0	0	0	0	5	7206676	7207392	+	717	C12orf60
ENSBGRG00000001618	72	3.15242	73	2.69667	59	2.28767	127	4.51594	57	2.61609	305	9.78138	55	2.27169	0	0	385	11.6303	2	33316633	33403696	-	2648	PNKD
ENSBGRG00000001619	0	0	0	0	0	0	0	0	0	0	0	0	0	0	0	0	0	0	1	141734186	141735064	-	879	-
ENSBGRG00000001620	0	0	0	0	0	0	0	0	0	0	0	0	0	0	0	0	0	0	6	57304550	57389838	+	2271	GABRA4
ENSBGRG00000001621	0	0	0	0	5	0.227054	20	0.832897	31	1.66631	90	3.38034	0	0	0	0	0	0	7	10742480	10749581	-	2261	AQP3
ENSBGRG00000001622	111	28.2841	78	16.769	41	9.25192	189	39.1122	50	13.3553	47	8.77213	64	15.3841	11	2.98345	373	65.576	4	18648180	18653657	-	455	FMC1
ENSBGRG00000001624	0	0	0	0	0	0	0	0	0	0	0	0	0	0	0	0	0	0	1	141751171	141751986	-	735	-
ENSBGRG00000001625	70	7.3049	154	13.5591	44	4.06629	88	7.45814	76	8.31371	12	0.917245	45	4.42999	124	13.7735	12	0.864002	1	87492311	87505443	+	1111	RFC4
ENSBGRG00000001626	0	0	0	0	0	0	0	0	0	0	0	0	0	0	0	0	0	0	6	100802727	100802981	+	255	-
ENSBGRG00000001627	1057	29.5509	811	19.1298	1141	28.2495	917	20.8208	1068	31.2991	1219	24.9625	979	25.8198	1317	39.1912	715	13.7918	2	62226187	62404155	-	4147	MYO1B
ENSBGRG00000001628	1125	34.0108	1571	40.0713	1528	40.9088	1424	34.9628	773	24.4968	1264	27.9898	914	26.0666	615	19.79	1403	29.2644	3	131758096	131789914	+	3835	SEPTIN2
ENSBGRG00000001629	0	0	0	0	0	0	0	0	0	0	0	0	0	0	0	0	0	0	5	7211179	7221837	-	1075	-
ENSBGRG00000001631	498	16.5865	674	18.94	527	15.5441	651	17.6092	471	16.4442	801	19.541	700	21.9937	680	24.1069	547	12.5699	8	50037150	50110384	+	3481	SEC24A
ENSBGRG00000001632	0	0	0	0	0	0	0	0	0	0	0	0	0	0	0	0	0	0	1	159397535	159405612	-	972	-
ENSBGRG00000001633	0	0	0	0	0	0	13	0.665616	0	0	0	0	55	3.27103	0	0	0	0	7	56436913	56457250	-	1839	-
ENSBGRG00000001634	4241	217.469	4791	207.276	3426	155.577	3253	135.471	3149	169.265	3492	131.157	2915	141.007	2922	159.484	3248	114.911	5	80667661	80694993	+	2261	EIF4B
ENSBGRG00000001636	227	17.0565	345	21.8714	429	28.5464	347	21.1751	376	29.6154	270	14.8599	335	23.7456	532	42.5484	219	11.3534	7	32707280	32775309	+	1543	FSD1L
ENSBGRG00000001637	0	0	0	0	0	0	0	0	0	0	0	0	0	0	0	0	0	0	1	141845929	141847062	+	1134	FOXL2
ENSBGRG00000001639	0	0	0	0	0	0	0	0	0	0	0	0	0	0	0	0	0	0	4	100300416	100300910	+	495	-
ENSBGRG00000001640	0	0	0	0	0	0	16	1.82611	0	0	0	0	0	0	4	0.598333	0	0	5	7221858	7226618	-	825	-
ENSBGRG00000001643	0	0	0	0	0	0	0	0	0	0	0	0	0	0	0	0	0	0	2	134143720	134275450	+	351	PPP1R1C
ENSBGRG00000001644	66	7.13139	78	7.11079	135	12.9179	0	0	28	3.17142	0	0	0	0	72	8.28075	80	5.964	4	55282544	55336891	+	1073	SNX10
ENSBGRG00000001645	643	54.0993	654	46.425	618	46.0467	353	24.1206	496	43.7449	668	41.1667	285	22.6204	485	43.434	462	26.8189	6	100847580	100905465	+	1378	METAP1
ENSBGRG00000001646	26	7.12628	0	0	1	0.242727	50	11.1299	12	3.44775	49	9.83726	0	0	50	14.587	26	4.91678	8	6165705	6167588	-	423	NR2C2AP
ENSBGRG00000001647	82	4.6173	41	1.94783	114	5.6847	70	3.20113	8	0.472203	130	5.36174	58	3.08088	31	1.85799	212	8.23621	5	125911919	125988143	+	2059	GRAMD4
ENSBGRG00000001648	0	0	0	0	0	0	0	0	0	0	0	0	0	0	0	0	0	0	4	100302616	100303110	+	495	-
ENSBGRG00000001649	79	4.37611	94	4.39321	56	2.74712	132	5.93836	12	0.696799	266	10.7927	78	4.07595	36	2.12261	336	12.8416	5	117595631	117606019	-	2093	ANKRD54
ENSBGRG00000001650	250	8.36502	423	11.9415	419	12.4157	169	4.59246	287	10.0664	294	7.20547	163	5.14503	379	13.4981	177	4.08618	1	141971500	142165695	+	3465	PIK3CB
ENSBGRG00000001651	70	26.012	251	78.6941	197	64.8292	84	25.3505	83	32.331	101	27.4907	72	25.2396	48	18.9856	115	29.4843	5	7271584	7277213	-	312	MGP
ENSBGRG00000001653	5226	381.788	8319	512.764	7289	471.574	6717	398.53	6069	464.767	7233	387.044	5127	353.338	5174	402.334	5758	290.23	1	87505785	87511768	-	1587	-
ENSBGRG00000001654	38	3.20181	176	12.5117	7	0.522323	73	4.99536	38	3.3563	64	3.94984	62	4.92807	45	4.03581	85	4.94138	7	56458876	56464652	+	1376	EXOSC3
ENSBGRG00000001655	107	3.06839	548	13.2587	267	6.78058	682	15.8834	187	5.62125	244	5.12512	308	8.33203	103	3.14391	441	8.72534	7	112267151	112418628	-	4043	SCARA5
ENSBGRG00000001656	8	1.53055	0	0	0	0	0	0	0	0	0	0	0	0	0	0	0	0	4	100343092	100343697	+	606	TWIST1
ENSBGRG00000001658	11	1.13869	0	0	0	0	0	0	0	0	0	0	0	0	0	0	0	0	3	55679708	55709417	-	1120	C1orf146
ENSBGRG00000001659	49	1.90064	50	1.63632	93	3.1946	116	3.65422	91	3.70008	160	4.54582	169	6.18393	19	0.784449	152	4.06785	3	131806224	131890080	+	2989	-
ENSBGRG00000001660	0	0	0	0	0	0	0	0	0	0	0	0	31	14.1271	25	12.8548	0	0	6	57563753	57563992	+	240	COX7B2
ENSBGRG00000001661	306	45.6008	336	42.2457	135	17.8161	459	55.5514	230	35.9289	745	81.3196	444	62.4176	216	34.2619	557	57.2695	8	19471942	19473792	+	778	MICOS13
ENSBGRG00000001662	771	22.1699	1234	29.9376	743	18.9203	1050	24.5206	800	24.1138	869	18.3028	949	25.7424	950	29.0764	1195	23.708	4	18661029	18752797	-	4032	UBN2
ENSBGRG00000001663	0	0	0	0	15	1.37632	0	0	24	2.60661	0	0	8	0.781923	0	0	0	0	5	7318122	7342319	-	1119	ERP27
ENSBGRG00000001664	324	17.4312	786	35.6778	596	28.3961	551	24.075	557	31.4126	704	27.7424	346	17.5603	626	35.8479	462	17.1491	3	100260073	100288759	+	2155	-
ENSBGRG00000001666	46	2.43303	128	5.71206	17	0.796283	4	0.171823	27	1.49699	47	1.82086	88	4.39082	54	3.04012	46	1.67867	6	111707554	111730999	-	2192	CASP6
ENSBGRG00000001668	40	3.65163	7	0.53916	1	0.0808454	55	4.07775	11	1.05265	18	1.20361	46	3.96148	34	3.30379	58	3.65319	8	22692227	22695803	-	1270	PLEKHJ1
ENSBGRG00000001670	194	11.9512	139	7.22467	355	19.3673	258	12.9081	356	22.9893	160	7.21969	204	11.8553	264	17.311	141	5.99304	5	19543977	19548244	-	1882	BHLHE41
ENSBGRG00000001672	0	0	0	0	0	0	0	0	0	0	0	0	0	0	0	0	0	0	3	66840480	66841814	-	1335	-
ENSBGRG00000001673	12	2.13713	11	1.65285	25	3.94292	0	0	4	0.746748	16	2.08717	30	5.04016	44	8.34082	0	0	1	142184509	142200522	-	651	FAIM
ENSBGRG00000001675	0	0	0	0	0	0	0	0	0	0	0	0	0	0	0	0	0	0	3	67492887	67494113	+	1227	-
ENSBGRG00000001676	453	14.8447	133	3.6772	85	2.46672	182	4.84368	96	3.29768	395	9.48108	516	15.9513	83	2.89506	122	2.75835	1	63372622	63386889	+	3538	ZDHHC23
ENSBGRG00000001678	495	22.1412	515	19.4355	250	9.90294	480	17.4369	229	10.7373	599	19.625	321	13.5448	297	14.1403	918	28.3306	2	33385354	33397116	+	2592	TMBIM1
ENSBGRG00000001679	0	0	1	0.0973323	0	0	1	0.0936906	0	0	0	0	0	0	1	0.122792	0	0	1	91133350	91134354	-	1005	-
ENSBGRG00000001680	0	0	0	0	0	0	23	0.652307	0	0	0	0	0	0	0	0	0	0	6	57958548	58107377	+	3320	GABRA2
ENSBGRG00000001682	0	0	0	0	0	0	0	0	0	0	0	0	0	0	0	0	0	0	5	76968042	76972012	-	717	C1QL4
ENSBGRG00000001683	88	8.90283	34	2.90213	130	11.6471	117	9.6131	71	7.52955	74	5.4836	114	10.8799	78	8.39938	13	0.907416	1	91244388	91245533	-	1146	B3GNT5
ENSBGRG00000001684	31	0.705974	120	2.30569	39	0.78654	95	1.75704	65	1.55169	127	2.11845	68	1.46086	70	1.69681	202	3.17392	7	10761785	10776685	-	5091	NOL6
ENSBGRG00000001685	35	19.8915	8	3.83604	10	5.03303	36	16.6163	15	8.93627	19	7.90937	3	1.6084	23	13.9134	16	6.2739	1	159419209	159419412	+	204	-
ENSBGRG00000001687	97	8.6442	40	3.0075	81	6.39245	68	4.92146	89	8.31396	234	15.2741	43	3.61489	101	9.58034	167	10.268	5	7344536	7367140	-	1301	ARHGDIB
ENSBGRG00000001688	0	0	0	0	0	0	0	0	0	0	0	0	0	0	0	0	0	0	8	6180946	6207636	+	4546	NCAN
ENSBGRG00000001690	411	50.1062	340	34.9721	271	29.2582	159	15.7427	296	37.8274	239	21.342	295	33.927	294	38.1508	279	23.4677	7	56466649	56478807	-	951	TRMT10B
ENSBGRG00000001691	459	72.9987	452	60.6504	603	84.9276	778	100.488	566	94.3592	879	102.395	774	116.123	539	91.2427	1470	161.301	5	19650379	19697487	+	729	SSPN
ENSBGRG00000001692	52	2.99495	0	0	47	2.39725	17	0.795183	0	0	0	0	52	2.82529	53	3.24915	32	1.27161	1	91361811	91396212	+	2013	-
ENSBGRG00000001695	142	8.21935	111	5.42082	147	7.53522	124	5.82912	131	7.94851	122	5.17246	116	6.33404	111	6.83879	266	10.623	6	100917186	100933856	-	2003	ADH5
ENSBGRG00000001696	0	0	0	0	0	0	0	0	0	0	0	0	0	0	0	0	0	0	5	76985073	76990588	+	1586	DNAJC22
ENSBGRG00000001698	0	0	0	0	0	0	0	0	0	0	0	0	0	0	0	0	0	0	5	7391219	7395689	+	655	PDE6H
ENSBGRG00000001699	397	14.6352	231	7.18479	276	9.01048	709	21.227	306	11.8249	1424	38.451	827	28.76	261	10.2413	3066	77.9829	3	21556347	21567608	-	3145	SEMA6C
ENSBGRG00000001703	445	21.0669	465	18.5732	459	19.2435	1184	45.5224	385	19.1059	1338	46.3965	375	16.7474	125	6.29881	3599	117.555	8	22700399	22745243	-	2449	JSRP1
ENSBGRG00000001704	139	10.3637	228	14.3426	179	11.819	126	7.62961	194	15.1624	232	12.67	202	14.2077	166	13.1739	113	5.81294	4	70231974	70379481	+	1555	ZNF277
ENSBGRG00000001705	19	0.669965	8	0.238002	7	0.218588	0	0	22	0.813179	1	0.0258277	17	0.565485	0	0	85	2.06793	1	63392571	63503051	-	3288	CCDC191
ENSBGRG00000001706	117	2.73265	31	0.610876	32	0.661877	22	0.417304	31	0.758971	33	0.564548	26	0.572856	28	0.696087	143	2.30437	3	38589167	38604002	+	4964	AMPD2
ENSBGRG00000001707	0	0	18	1.93914	7	0.791537	17	1.76289	15	2.00771	90	8.41734	19	2.28861	25	3.39775	55	4.84534	3	108416285	108420334	+	908	MOB3C
ENSBGRG00000001708	339	31.569	385	30.2492	246	20.2873	282	21.3276	270	26.3566	320	21.8272	262	23.0163	166	16.4542	311	19.982	1	170115692	170131993	-	1245	-
ENSBGRG00000001709	27	2.21383	14	0.968505	43	3.12233	9	0.599315	0	0	12	0.720693	5	0.386745	0	0	100	5.65716	3	131894625	131904449	+	1414	-
ENSBGRG00000001711	187	3.82577	235	4.05637	186	3.36992	136	2.25968	172	3.68868	100	1.49853	113	2.18087	84	1.82921	48	0.677541	3	55747768	55843267	-	5667	BTBD8
ENSBGRG00000001712	0	0	0	0	0	0	0	0	0	0	0	0	0	0	0	0	0	0	6	58271379	58367942	+	1589	GABRG1
ENSBGRG00000001713	66	10.2849	28	3.68136	60	8.28014	11	1.39214	109	17.8053	75	8.56065	50	7.35023	14	2.32216	50	5.37582	5	7531560	7673237	-	744	RERG
ENSBGRG00000001714	128	7.0001	89	4.10655	113	5.4727	88	3.90849	63	3.6116	187	7.49073	130	6.70674	177	10.3033	60	2.26393	1	142219973	142304509	+	2120	CEP70
ENSBGRG00000001715	223	25.1502	331	31.4962	407	40.65	82	7.51074	133	15.7237	221	18.2565	232	24.683	212	25.4495	135	10.5048	8	50119583	50127287	+	1028	CAMLG
ENSBGRG00000001716	192	4.11542	137	2.47757	157	2.98018	379	6.59757	168	3.77475	337	5.29092	256	5.17639	237	5.40715	573	8.47394	8	14821099	14866167	-	5409	COL5A3
ENSBGRG00000001718	368	76.4617	122	21.3869	379	69.7372	204	34.4237	155	33.7593	462	70.3115	163	31.949	154	34.0583	413	59.2057	6	111738245	111749361	-	558	PLA2G12A
ENSBGRG00000001720	52	4.52276	75	5.50369	9	0.693221	42	2.96675	76	6.92913	129	8.21822	55	4.5127	98	9.07263	47	2.82043	3	9346552	9376305	-	1333	CFAP126
ENSBGRG00000001721	23	1.62499	29	1.72867	45	2.81555	132	7.57404	66	4.88799	14	0.724499	80	5.33194	16	1.20323	17	0.828682	5	77099335	77182562	+	1641	SPATS2
ENSBGRG00000001725	652	29.13	335	12.6279	281	11.118	266	9.65176	385	18.031	230	7.52677	304	12.8127	43	2.04488	144	4.43887	1	91405563	91472650	+	2595	MCCC1
ENSBGRG00000001727	13	6.05305	14	5.49986	16	6.59751	0	0	0	0	0	0	0	0	0	0	13	4.1763	1	170122135	170126654	-	249	-
ENSBGRG00000001728	1705	24.3234	3306	39.792	2573	32.5064	1976	22.8938	2990	44.7133	1877	19.6134	2140	28.7997	2439	37.0355	1549	15.2465	5	19821144	20459903	-	8127	ITPR2
ENSBGRG00000001730	24	1.06326	3	0.112135	35	1.37317	33	1.18733	15	0.696599	75	2.43375	69	2.88369	30	1.41467	129	3.94306	5	125994793	126034178	-	2617	CERK
ENSBGRG00000001733	3	0.270886	0	0	0	0	0	0	0	0	12	0.79366	0	0	29	2.78721	0	0	1	170189806	170191089	-	1284	-
ENSBGRG00000001734	15	0.295612	0	0	35	0.610841	11	0.176058	9	0.185926	9	0.129916	27	0.50196	0	0	28	0.380721	7	56486060	56607164	-	5883	FRMPD1
ENSBGRG00000001735	25	5.22248	0	0	0	0	11	1.86622	0	0	0	0	22	4.33544	0	0	5	0.720651	3	21588179	21588733	+	555	TNFAIP8L2
ENSBGRG00000001736	0	0	0	0	0	0	0	0	0	0	0	0	0	0	0	0	0	0	1	87546163	87571353	-	2007	KNG1
ENSBGRG00000001737	151	9.73141	345	18.7591	207	11.814	267	13.9747	132	8.9174	401	18.9292	309	18.7859	323	22.1569	1003	44.5982	3	131905943	131915960	-	1799	STK25
ENSBGRG00000001739	0	0	0	0	0	0	0	0	0	0	0	0	0	0	0	0	0	0	3	100302083	100313800	+	621	LDLRAD1
ENSBGRG00000001740	67	2.5586	150	4.83295	115	3.88916	158	4.90024	78	3.1224	302	8.44741	174	6.26832	72	2.92663	97	2.55575	2	134299062	134719865	-	3036	PDE1A
ENSBGRG00000001742	284	13.2236	346	13.5925	208	8.57676	267	10.0966	95	4.63681	273	9.31069	388	17.0426	129	6.39333	241	7.74222	3	108435605	108473317	+	2490	MKNK1
ENSBGRG00000001743	4	0.130931	2	0.0552337	0	0	0	0	9	0.308809	0	0	0	0	0	0	0	0	1	171036679	171586895	+	3542	KCNH8
ENSBGRG00000001744	86	8.55126	106	8.89263	81	7.13257	72	5.81428	24	2.50154	37	2.69477	109	10.2243	45	4.76268	52	3.56741	5	84309906	84555561	-	1166	-
ENSBGRG00000001745	40	2.87334	77	4.6667	41	2.60819	28	1.63349	12	0.903593	7	0.368309	20	1.35528	28	2.14088	16	0.792984	4	55642596	56009583	-	1614	SKAP2
ENSBGRG00000001746	128	7.86862	89	4.61606	64	3.48416	125	6.24066	76	4.89742	295	13.2831	173	10.0325	66	4.31856	562	23.8365	2	33402766	33408412	+	1886	AAMP
ENSBGRG00000001747	98	16.7582	81	11.6863	57	8.63186	51	7.08276	51	9.14189	76	9.51924	88	14.1957	13	2.3662	309	36.4566	3	21590358	21598596	-	678	LYSMD1
ENSBGRG00000001748	0	0	0	0	0	0	0	0	0	0	0	0	0	0	0	0	0	0	2	62444623	62445861	-	1239	-
ENSBGRG00000001749	0	0	0	0	0	0	6	0.203075	16	0.698969	17	0.518932	0	0	9	0.399229	0	0	6	111762368	111821014	-	2782	CFI
ENSBGRG00000001750	648	11.2873	662	9.72899	892	13.7598	691	9.77523	571	10.426	477	6.08588	698	11.4695	769	14.2577	472	5.67252	3	67507768	67836651	-	6656	ADGRL2
ENSBGRG00000001751	534	12.267	173	3.35302	346	7.03886	279	5.20515	147	3.53981	417	7.01651	251	5.43932	439	10.7342	169	2.67856	4	100512996	101143271	-	5047	HDAC9
ENSBGRG00000001752	0	0	0	0	0	0	0	0	0	0	0	0	0	0	0	0	0	0	5	77195879	77217479	+	3225	KCNH3
ENSBGRG00000001753	0	0	0	0	0	0	0	0	0	0	0	0	0	0	0	0	0	0	8	87519195	87705958	+	3912	WWC1
ENSBGRG00000001754	0	0	0	0	0	0	0	0	0	0	0	0	0	0	0	0	0	0	6	59494574	59495257	+	306	-
ENSBGRG00000001755	105	40.1769	43	13.8819	61	20.6703	113	35.1154	101	40.5111	197	55.2131	229	82.6602	68	27.6951	330	87.1202	1	171048152	171048454	-	303	-
ENSBGRG00000001756	27	0.900045	0	0	21	0.619939	0	0	0	0	0	0	0	0	0	0	0	0	7	112448388	112502858	-	3478	NUGGC
ENSBGRG00000001757	37	1.68821	67	2.57925	19	0.767729	46	1.70457	21	1.00441	12	0.401047	43	1.85083	0	0	60	1.88884	1	63510159	63532755	+	2541	QTRT2
ENSBGRG00000001758	150	21.2343	157	18.7516	51	6.3936	11	1.26465	68	10.0907	67	6.94719	40	5.34171	120	18.0815	51	4.9812	3	21599502	21602925	+	819	SCNM1
ENSBGRG00000001759	0	0	35	0.543352	0	0	13	0.194266	12	0.231455	0	0	0	0	38	0.744237	0	0	5	7750309	8035611	+	6301	PTPRO
ENSBGRG00000001760	266	15.7507	238	11.8901	415	21.7618	249	11.9743	469	29.1109	219	9.49839	280	15.6404	187	11.786	300	12.2562	5	84618335	84664412	-	1958	SOCS2
ENSBGRG00000001761	610	26.6176	481	17.7083	532	20.5579	230	8.15076	283	12.9446	381	12.1773	474	19.5115	333	15.4664	255	7.67708	4	70489496	70517480	+	2657	IFRD1
ENSBGRG00000001762	51	1.98686	24	0.788863	24	0.828014	6	0.189837	0	0	0	0	9	0.33076	56	2.32216	9	0.241912	2	62576871	62703604	+	2976	STAT4
ENSBGRG00000001763	1304	96.296	1191	74.2053	1087	71.0868	848	50.8579	1234	95.5236	743	40.189	789	54.9644	789	62.0175	553	28.1756	1	91503287	91536405	+	1570	DCUN1D1
ENSBGRG00000001764	19	0.688389	87	2.65945	1	0.0320855	71	2.08915	36	1.36725	12	0.318456	21	0.71775	10	0.385644	26	0.649937	1	171908279	171987890	-	3200	EFHB
ENSBGRG00000001765	192	4.70719	144	2.97863	75	1.62836	287	5.71445	193	4.96002	467	8.38621	210	4.85684	298	7.7765	898	15.1899	1	159554031	159691247	+	4729	DIP2A
ENSBGRG00000001767	0	0	0	0	0	0	0	0	0	0	0	0	0	0	0	0	0	0	8	14869066	14876003	+	1059	RDH8
ENSBGRG00000001768	0	0	0	0	0	0	0	0	0	0	0	0	0	0	0	0	0	0	8	6217097	6221520	-	1209	HAPLN4
ENSBGRG00000001769	0	0	0	0	0	0	0	0	0	0	0	0	0	0	0	0	0	0	2	33409338	33410327	-	990	GPBAR1
ENSBGRG00000001770	10205	995.925	14344	1181.07	12649	1093.2	12487	989.7	11255	1151.4	13957	997.686	9625	886.111	13201	1371.28	18657	1256.24	3	21603431	21607680	-	1188	TMOD4
ENSBGRG00000001771	851	26.1362	753	19.512	612	16.6454	478	11.9227	468	15.0669	364	8.18847	459	13.2984	534	17.4567	310	6.5689	8	50133891	50190731	+	3775	DDX46
ENSBGRG00000001772	38	2.1222	18	0.848141	33	1.6321	19	0.861764	9	0.526879	74	3.02707	48	2.52882	21	1.24833	47	1.811	3	9534070	9663051	+	2076	-
ENSBGRG00000001773	0	0	23	0.530997	27	0.654281	11	0.244454	26	0.745779	44	0.881886	52	1.3423	52	1.51454	40	0.755178	8	22701473	22710755	+	4237	-
ENSBGRG00000001775	86	8.11291	171	13.6103	161	13.4503	98	7.50821	137	13.5477	145	10.0192	112	9.96713	130	13.0535	80	5.20698	5	84704405	84772839	-	1229	-
ENSBGRG00000001777	202	5.12242	292	6.24741	423	9.49934	302	6.2196	379	10.0746	536	9.95582	178	4.25812	227	6.12712	185	3.23678	6	59732619	59879521	+	4572	GNPDA2
ENSBGRG00000001778	24	17.8368	67	42.012	31	20.4031	129	77.8623	19	14.8021	50	27.2185	76	53.2835	40	31.6426	39	19.9981	7	56674706	56677611	+	156	TOMM5
ENSBGRG00000001779	18	0.541491	0	0	32	0.852506	96	2.34543	20	0.630687	184	4.05438	62	1.75948	1	0.0320203	181	3.75677	5	126070012	126475782	+	3854	TBC1D22A
ENSBGRG00000001780	94	4.48858	100	4.02879	52	2.19894	286	11.0912	97	4.85533	266	9.30361	202	9.09927	41	2.08388	350	11.531	5	77217221	77228426	-	2428	MCRS1
ENSBGRG00000001781	483	12.6837	762	16.8829	469	10.9069	399	8.5095	447	12.3047	357	6.86682	458	11.3459	276	7.71464	270	4.89194	1	91572601	91705651	-	4415	ATP11B
ENSBGRG00000001782	0	0	0	0	0	0	10	0.0654428	0	0	0	0	0	0	0	0	13	0.0722754	2	87727149	89013890	-	14388	LRP1B
ENSBGRG00000001784	926	46.3757	703	29.7049	986	43.7306	825	33.5556	778	40.8436	953	34.9591	811	38.3154	880	46.9104	495	17.1042	2	33418620	33453154	-	2315	ARPC2
ENSBGRG00000001785	275	17.1048	215	11.2828	94	5.17775	235	11.8709	131	8.54124	310	14.1232	280	16.4292	75	4.96538	280	12.016	3	21609615	21624208	-	1864	VPS72
ENSBGRG00000001786	0	0	0	0	0	0	0	0	0	0	0	0	0	0	0	0	0	0	8	6224962	6232400	-	1584	TM6SF2
ENSBGRG00000001787	1	0.0920152	0	0	0	0	0	0	0	0	0	0	0	0	4	0.391766	4	0.253944	7	32712485	32713744	-	1260	-
ENSBGRG00000001788	14	1.01574	0	0	0	0	0	0	0	0	0	0	0	0	0	0	0	0	7	96574653	96697635	-	1598	SAXO1
ENSBGRG00000001789	1643	37.3506	2453	47.049	1596	32.1308	1515	27.9708	1279	30.4786	2085	34.718	1823	39.0949	1961	47.4509	2116	33.1889	2	62722435	62767822	+	5100	STAT1
ENSBGRG00000001790	0	0	0	0	0	0	0	0	0	0	0	0	22	1.80238	0	0	0	0	4	18723769	18725103	+	1335	-
ENSBGRG00000001791	457	50.8974	603	56.6617	424	41.8191	449	40.6123	474	55.3379	398	32.4676	480	50.4306	345	40.8983	466	35.8082	1	171996226	172032562	+	1041	RAB5A
ENSBGRG00000001792	292	87.4786	145	36.6505	360	95.5104	239	58.1499	131	41.1392	279	61.2226	267	75.4578	167	53.2528	199	41.1329	4	70525606	70533521	+	387	LSMEM1
ENSBGRG00000001793	0	0	0	0	0	0	0	0	0	0	0	0	0	0	0	0	0	0	6	100955541	100998768	-	1282	ADH4
ENSBGRG00000001794	0	0	0	0	0	0	0	0	0	0	0	0	0	0	0	0	0	0	3	21629369	21629812	-	444	-
ENSBGRG00000001795	105	5.75857	117	5.41382	62	3.01124	113	5.0331	71	4.08177	161	6.46754	182	9.41608	45	2.62691	142	5.37318	3	100344524	100368374	-	2114	LRRC42
ENSBGRG00000001796	0	0	17	0.555233	0	0	11	0.345826	0	0	38	1.07747	61	2.2276	0	0	86	2.29694	3	131947024	131961123	+	2995	BOK
ENSBGRG00000001797	34	0.884238	49	1.07517	28	0.644878	78	1.64747	33	0.899641	55	1.04771	40	0.98135	11	0.304502	0	0	7	56690969	56735340	+	4458	FBXO10
ENSBGRG00000001798	0	0	0	0	0	0	0	0	0	0	0	0	0	0	0	0	0	0	8	87551178	87552073	+	243	-
ENSBGRG00000001799	1767	112.316	2071	111.065	1738	97.8327	1818	93.8493	1624	108.207	2101	97.8182	1480	88.7443	1642	111.093	2039	89.4211	5	117617574	117639353	+	1824	EIF3L
ENSBGRG00000001800	1901	50.6318	1514	34.022	925	21.8179	1477	31.9488	853	23.8153	1438	28.0536	1247	31.3315	1094	31.0146	1378	25.3226	8	19476673	19510991	-	4353	-
ENSBGRG00000001802	668	82.2159	728	75.5968	752	81.9646	629	62.8727	417	53.7998	1098	98.9851	663	76.978	627	82.1398	668	56.7248	7	96712232	96713173	+	942	-
ENSBGRG00000001803	3	0.258793	0	0	0	0	0	0	3	0.27128	1	0.0631857	1	0.0813775	10	0.918201	0	0	4	70655489	70656832	-	1344	-
ENSBGRG00000001804	0	0	0	0	0	0	0	0	0	0	14	1.0084	0	0	0	0	0	0	5	84707723	84708901	+	1179	-
ENSBGRG00000001805	163	10.7132	224	12.4215	237	13.7946	84	4.48376	241	16.604	216	10.3986	75	4.65015	160	11.1933	75	3.40103	7	32808535	32890148	+	1764	FKTN
ENSBGRG00000001808	0	0	0	0	0	0	0	0	0	0	0	0	24	2.16577	0	0	0	0	4	70723003	70724214	-	1212	-
ENSBGRG00000001809	168	8.66449	276	12.0098	72	3.28848	327	13.6966	66	3.56815	706	26.6702	190	9.24403	112	6.14835	1162	41.3483	3	131973362	132015024	-	2248	THAP4
ENSBGRG00000001810	548	32.0397	662	32.6556	577	29.8753	389	18.4709	476	29.1729	317	13.5755	578	31.8793	354	22.0302	234	9.43932	8	87715845	87754090	+	1983	RARS1
ENSBGRG00000001811	408	20.9863	457	19.8329	380	17.3097	506	21.1377	378	20.3814	334	12.5838	341	16.5464	325	17.7937	455	16.1475	3	21639058	21677614	+	2254	PIP5K1A
ENSBGRG00000001812	0	0	0	0	0	0	0	0	0	0	0	0	0	0	0	0	0	0	1	87577607	87588048	-	2183	HRG
ENSBGRG00000001813	229	9.59872	303	10.7155	334	12.3981	266	9.05506	279	12.2588	118	3.62283	154	6.08937	298	13.2954	88	2.54494	7	96720178	96763949	-	2766	HAUS6
ENSBGRG00000001814	0	0	0	0	0	0	0	0	0	0	0	0	0	0	0	0	0	0	3	108480780	108485680	+	375	KNCN
ENSBGRG00000001815	383	14.7426	346	11.2368	382	13.0217	346	10.8164	353	14.2434	437	12.321	339	12.3097	239	9.79219	221	5.86928	4	70784774	70843605	-	3012	TMEM168
ENSBGRG00000001816	427	108.566	349	74.8658	370	83.3098	392	80.9437	189	50.3724	449	83.618	373	89.4639	367	99.3204	372	65.2568	5	84789115	84836934	+	456	UBE2N
ENSBGRG00000001817	217	7.4171	176	5.07551	115	3.48098	149	4.13611	43	1.54066	247	6.18386	118	3.80478	47	1.70993	348	8.20675	8	6234296	6274133	-	3392	SUGP1
ENSBGRG00000001818	0	0	0	0	0	0	0	0	0	0	0	0	0	0	0	0	0	0	7	112515541	112516617	+	1077	-
ENSBGRG00000001819	1341	34.6037	1354	29.4785	629	14.3739	1489	31.2047	885	23.9388	1538	29.0695	1239	30.1605	855	23.4837	1727	30.7471	8	22722810	22760105	+	4493	AP3D1
ENSBGRG00000001820	35	1.67819	201	8.13135	242	10.2759	44	1.7134	82	4.12148	90	3.16085	116	5.24693	222	11.3301	75	2.48115	3	100366661	100404769	+	2418	HSPB11
ENSBGRG00000001825	784	14.4372	606	9.41523	383	6.24588	807	12.069	108	2.08475	1022	13.7849	834	14.4879	366	7.17387	1158	14.7127	5	80707837	80723441	+	6296	TNS2
ENSBGRG00000001826	0	0	0	0	0	0	0	0	0	0	0	0	0	0	0	0	0	0	1	63563822	63615613	-	1203	DRD3
ENSBGRG00000001827	20	2.07219	1	0.0874164	0	0	0	0	0	0	15	1.13836	112	10.9469	0	0	21	1.50119	2	33490958	33494295	+	1119	-
ENSBGRG00000001829	73	4.59726	51	2.70981	42	2.34237	103	5.268	45	2.97067	97	4.47442	6	0.356452	10	0.670322	58	2.52012	4	70864125	70949680	-	1841	BMT2
ENSBGRG00000001830	0	0	0	0	0	0	0	0	0	0	0	0	0	0	0	0	0	0	3	108502362	108502895	+	534	TMEM275
ENSBGRG00000001831	0	0	0	0	0	0	0	0	0	0	0	0	0	0	0	0	0	0	5	20036640	20054269	+	246	-
ENSBGRG00000001832	6	0.379299	0	0	43	2.40729	6	0.308045	2	0.132534	46	2.12999	75	4.47266	0	0	0	0	2	33518656	33529270	-	1834	-
ENSBGRG00000001833	16	3.18733	0	0	20	3.52831	0	0	0	0	23	3.35601	0	0	0	0	0	0	1	142273452	142275042	+	582	-
ENSBGRG00000001834	13	1.26869	0	0	10	0.864257	13	1.03036	0	0	0	0	19	1.74921	0	0	0	0	1	87604502	87605689	+	1188	-
ENSBGRG00000001836	388	27.0501	180	10.5877	216	13.3359	516	29.2159	288	21.0473	230	11.745	294	19.3357	298	22.1137	393	18.9038	7	112519417	112649133	+	1663	ELP3
ENSBGRG00000001837	19	0.768077	48	1.63714	27	0.966594	43	1.41173	25	1.05939	32	0.947522	18	0.686431	107	4.60407	10	0.278913	5	77247479	77264069	-	2868	FAM186B
ENSBGRG00000001838	0	0	0	0	0	0	0	0	0	0	0	0	0	0	0	0	0	0	3	108523828	108530011	-	1125	DMBX1
ENSBGRG00000001839	85	2.9827	91	2.69417	39	1.21195	118	3.36282	24	0.882809	154	3.95821	102	3.37648	28	1.04582	300	7.26322	3	132015886	132035734	+	3304	ATG4B
ENSBGRG00000001840	0	0	0	0	0	0	0	0	0	0	0	0	0	0	0	0	0	0	8	87769896	87770888	+	993	FBLL1
ENSBGRG00000001842	2721	155.328	2523	121.515	2235	112.987	1606	74.4557	1706	102.086	1345	56.2381	1865	100.432	1187	72.1237	1555	61.2447	5	84853565	84872072	-	2031	-
ENSBGRG00000001843	0	0	1	0.0715051	24	1.80129	0	0	0	0	0	0	0	0	0	0	0	0	7	96768283	96769650	-	1368	-
ENSBGRG00000001844	311	84.4428	248	56.8129	316	75.9834	261	57.5539	146	41.5547	396	78.7564	172	44.0559	76	21.9646	267	50.0185	1	93712808	93717996	+	427	DNAJC19
ENSBGRG00000001845	3493	74.6361	4107	74.0403	4215	79.7585	3267	56.6933	3640	81.5299	2314	36.2161	2894	58.3341	2820	64.1367	2889	42.5908	1	172082712	172203590	+	5426	KAT2B
ENSBGRG00000001846	0	0	0	0	0	0	0	0	0	0	0	0	0	0	0	0	0	0	1	87609478	87625942	-	1659	FETUB
ENSBGRG00000001847	0	0	0	0	0	0	0	0	0	0	0	0	0	0	0	0	0	0	6	101057157	101077105	-	2228	ADH6
ENSBGRG00000001848	132	85.0221	222	120.643	195	111.23	278	145.423	99	66.8433	443	209.002	198	120.309	342	234.472	111	49.3285	4	71142884	71143063	-	180	SMIM30
ENSBGRG00000001849	0	0	0	0	0	0	0	0	0	0	0	0	0	0	0	0	0	0	3	55862243	55863948	-	1500	-
ENSBGRG00000001850	1633	40.5068	1706	35.7037	1786	39.233	1293	26.0479	1530	39.783	1149	20.8761	1375	32.1749	1684	44.4621	871	14.9066	8	87810532	87847797	+	4674	ZFYVE16
ENSBGRG00000001851	613	24.2314	493	16.4421	913	31.9608	425	13.6439	353	14.6271	515	14.9112	327	12.1938	540	22.7205	460	12.5457	6	59738143	59793582	-	2933	GUF1
ENSBGRG00000001852	20	6.33547	49	13.096	0	0	12	3.08718	7	2.32441	12	2.78432	4	1.19532	12	4.04611	0	0	5	20274976	20276650	-	366	-
ENSBGRG00000001853	0	0	0	0	0	0	0	0	0	0	0	0	0	0	0	0	0	0	4	71239441	71240451	+	1011	-
ENSBGRG00000001854	709	63.5738	264	19.9723	468	37.1626	270	19.662	256	24.0623	339	22.2648	193	16.3254	186	17.7522	365	22.5809	7	96776811	96783997	-	1293	PLIN2
ENSBGRG00000001855	0	0	0	0	0	0	0	0	0	0	0	0	0	0	0	0	0	0	2	33539019	33559981	-	2716	RUFY4
ENSBGRG00000001856	0	0	0	0	11	0.414463	18	0.621968	39	1.73938	8	0.249311	0	0	40	1.81147	0	0	3	9539786	9543591	+	2725	-
ENSBGRG00000001858	108	5.07351	205	8.12516	99	4.1186	133	5.07421	55	2.7084	145	4.98932	93	4.12137	2	0.100005	109	3.53288	7	56745149	56764054	-	2468	POLR1E
ENSBGRG00000001859	41	1.90521	0	0	35	1.44031	29	1.09443	15	0.730661	15	0.510551	0	0	0	0	10	0.32061	4	18766981	18812017	-	2495	TTC26
ENSBGRG00000001860	8	0.330429	0	0	28	1.02418	25	0.838609	0	0	29	0.877352	0	0	0	0	14	0.398964	1	142317578	142377061	-	2807	ESYT3
ENSBGRG00000001862	14357	496.285	9702	282.958	13724	420.123	13246	371.864	16754	607.087	12450	315.228	10352	337.571	16850	619.975	11942	284.814	4	71903066	71945358	-	3354	PPP1R3A
ENSBGRG00000001863	0	0	0	0	0	0	0	0	0	0	0	0	0	0	0	0	0	0	5	20437260	20438265	+	282	-
ENSBGRG00000001864	644	51.0354	559	37.3758	441	30.9495	743	47.8197	487	40.4557	1043	60.5422	545	40.7433	612	51.6231	781	42.7026	7	10794826	10895321	+	1463	UBE2R2
ENSBGRG00000001865	0	0	0	0	0	0	0	0	0	0	0	0	0	0	0	0	0	0	3	55867116	55905697	-	1933	EPHX4
ENSBGRG00000001866	0	0	0	0	0	0	0	0	0	0	0	0	0	0	0	0	0	0	8	87826407	87827663	-	1257	-
ENSBGRG00000001867	48	2.89396	11	0.559547	12	0.64071	9	0.440682	7	0.442399	43	1.89892	89	5.06191	0	0	155	6.44763	3	9546099	9549003	+	1923	HSPA6
ENSBGRG00000001868	0	0	0	0	0	0	0	0	0	0	0	0	0	0	0	0	0	0	3	100422945	100443323	-	2111	DIO1
ENSBGRG00000001869	0	0	6	0.250604	0	0	15	0.603068	7	0.363251	0	0	10	0.467	57	3.00348	47	1.60531	3	132038597	132050268	-	2342	DTYMK
ENSBGRG00000001870	0	0	0	0	0	0	0	0	0	0	0	0	0	0	0	0	0	0	1	87647828	87677995	-	1914	AHSG
ENSBGRG00000001871	1	0.0851242	9	0.646381	0	0	0	0	0	0	0	0	0	0	0	0	0	0	5	85015496	85016857	-	1362	-
ENSBGRG00000001872	20	3.12504	6	0.790989	21	2.90586	7	0.888293	28	4.58616	13	1.48785	0	0	0	0	0	0	6	111830175	111833063	+	742	GAR1
ENSBGRG00000001873	676	68.5694	512	43.8174	472	42.3989	672	55.3586	535	56.8857	1290	95.8433	447	42.7725	501	54.0914	1625	113.725	3	21685659	21694583	+	1143	PSMD4
ENSBGRG00000001876	3	0.0746069	10	0.209822	25	0.550588	13	0.262563	0	0	15	0.273236	50	1.17301	0	0	100	1.71583	3	108602032	108661592	-	4662	FAAH
ENSBGRG00000001877	0	0	0	0	0	0	0	0	0	0	0	0	0	0	0	0	0	0	5	20453981	20520721	+	324	-
ENSBGRG00000001878	413	13.0046	187	4.96799	249	6.94344	302	7.72299	110	3.63082	286	6.5963	145	4.30713	187	6.26751	472	10.2543	5	77278027	77299974	+	3682	PRPF40B
ENSBGRG00000001879	787	33.7941	622	22.5346	516	19.6221	884	30.8284	597	26.8724	830	26.1055	861	34.8773	383	17.5054	1349	39.9665	8	6273554	6318276	+	2700	MAU2
ENSBGRG00000001881	0	0	0	0	0	0	0	0	0	0	0	0	0	0	0	0	0	0	1	63717201	63735730	+	867	TIGIT
ENSBGRG00000001882	30	2.41205	83	5.63036	76	5.41137	80	5.2238	59	4.97258	0	0	43	3.26142	55	4.70689	13	0.72115	8	87864493	87900239	+	1442	FAM151B
ENSBGRG00000001883	0	0	0	0	0	0	2	0.0424905	0	0	0	0	48	1.18453	0	0	0	0	5	127646957	127853995	+	4432	-
ENSBGRG00000001884	11	1.12562	12	1.03603	26	2.35615	0	0	8	0.858135	2	0.149906	91	8.78446	13	1.41596	0	0	3	9572850	9581038	-	1133	-
ENSBGRG00000001885	0	0	0	0	0	0	0	0	0	0	0	0	0	0	0	0	0	0	7	112774751	112775217	+	183	-
ENSBGRG00000001886	71	4.87082	63	3.64651	51	3.09844	23	1.28145	60	4.31479	45	2.26123	8	0.517734	44	3.21294	19	0.899321	6	111838343	111858919	+	1690	RRH
ENSBGRG00000001887	103	7.92944	282	18.3167	117	7.97664	155	9.691	142	11.4593	194	10.9394	63	4.5753	70	5.73601	35	1.85905	1	87706586	87725523	-	1506	DNAJB11
ENSBGRG00000001888	0	0	0	0	0	0	0	0	0	0	0	0	0	0	0	0	0	0	8	87914127	87916916	-	1539	ANKRD34B
ENSBGRG00000001890	157	7.73914	161	6.69594	172	7.50845	166	6.64558	161	8.31924	224	8.08777	177	8.23076	296	15.5307	141	4.79545	5	20558155	20587689	-	2352	INTS13
ENSBGRG00000001891	0	0	0	0	0	0	0	0	0	0	0	0	0	0	0	0	0	0	7	112775587	112776277	+	255	-
ENSBGRG00000001892	193	10.5201	163	7.49623	195	9.41296	86	3.80709	133	7.5994	147	5.86906	63	3.23949	152	8.81887	127	4.77622	3	132059529	132076489	+	2127	ING5
ENSBGRG00000001893	2153	55.3966	1531	33.2359	1300	29.6218	2119	44.2794	1385	37.3554	1605	30.2484	1640	39.8067	1387	37.9859	1849	32.8241	7	10898791	10992726	-	4506	UBAP2
ENSBGRG00000001895	855	25.7342	980	24.8864	1315	35.0509	1598	39.0618	1062	33.5068	1464	32.2755	1360	38.615	672	21.5288	1462	30.3605	1	63774174	63902042	-	3852	ZBTB20
ENSBGRG00000001896	1240	24.5039	1073	17.8898	1745	30.5379	1103	17.702	1071	22.1855	1017	14.7205	1044	19.462	1074	22.5905	652	8.88954	7	96917169	97010653	+	5867	DENND4C
ENSBGRG00000001898	90	2.79596	32	0.838748	59	1.62319	128	3.22946	49	1.59569	121	2.75335	145	4.24943	148	4.89392	199	4.26539	5	117667155	117699948	+	3732	MICALL1
ENSBGRG00000001899	23	2.06234	23	1.74001	11	0.873481	34	2.47595	23	2.16185	5	0.32839	90	7.61286	20	1.90884	14	0.866118	7	32903575	32904900	-	1293	-
ENSBGRG00000001900	6876	206.528	6883	174.427	9046	240.618	4678	114.113	6456	203.269	5502	121.046	5616	159.127	4515	144.347	4392	91.017	1	93724375	93808102	-	3860	FXR1
ENSBGRG00000001901	76	1.85659	46	0.948098	238	5.14883	89	1.76573	58	1.48524	177	3.16712	78	1.79751	133	3.45829	88	1.48321	4	72179752	72803945	+	4746	FOXP2
ENSBGRG00000001902	62	1.94014	87	2.29696	45	1.24705	91	2.31268	41	1.3449	182	4.17159	123	3.63095	71	2.36487	252	5.44077	3	21752433	21758549	+	3705	ZNF687
ENSBGRG00000001903	0	0	0	0	0	0	0	0	0	0	0	0	0	0	0	0	0	0	3	55921504	55980211	-	5880	BRDT
ENSBGRG00000001904	656	14.0454	745	13.458	618	11.7179	536	9.32027	756	16.9675	546	8.56274	622	12.5631	450	10.2554	404	5.96802	5	85331258	85465945	+	5415	EEA1
ENSBGRG00000001905	140	6.9129	202	8.41543	205	8.96427	172	6.89751	162	8.38518	207	7.4867	167	7.77897	220	11.5628	64	2.18037	1	87725880	87753459	+	2348	TBCCD1
ENSBGRG00000001906	111	5.86566	109	4.85974	60	2.80785	103	4.42041	44	2.43731	141	5.45759	54	2.69191	92	5.17474	227	8.27631	7	56798123	56807771	+	2194	ZBTB5
ENSBGRG00000001907	10	1.02783	11	0.953908	19	1.72943	25	2.08686	7	0.754196	17	1.27985	1	0.0969605	1	0.109403	9	0.638236	3	9619181	9620740	+	1128	-
ENSBGRG00000001908	48	6.939	0	0	66	8.44946	39	4.57881	37	5.6069	27	2.85896	0	0	0	0	52	5.18653	8	87977651	87994842	-	802	-
ENSBGRG00000001909	3	0.116017	0	0	0	0	0	0	0	0	0	0	0	0	0	0	0	0	7	112845752	112884501	+	2998	PNOC
ENSBGRG00000001910	0	0	0	0	0	0	0	0	0	0	10	0.328644	0	0	0	0	0	0	8	22760552	22765220	-	2584	IZUMO4
ENSBGRG00000001911	0	0	0	0	2	0.16901	0	0	0	0	1	0.0698944	0	0	0	0	0	0	8	6296347	6297561	-	1215	-
ENSBGRG00000001912	67	3.20327	90	3.63039	32	1.35487	144	5.5913	18	0.902103	115	4.02721	69	3.11201	46	2.3409	284	9.36816	3	132088325	132115142	+	2425	D2HGDH
ENSBGRG00000001913	532	56.9526	655	59.1611	506	47.9713	582	50.6007	516	57.9051	405	31.7574	284	28.681	330	37.603	426	31.4651	7	32932552	32993987	+	1083	TMEM38B
ENSBGRG00000001914	5397	83.1526	4030	52.3868	2533	34.5611	4227	52.8917	2163	34.9338	4878	55.0495	3903	56.7278	2196	36.0133	7331	77.93	2	33592222	33840431	+	7525	TNS1
ENSBGRG00000001916	44	4.33786	100	8.31794	109	9.51653	88	7.04592	83	8.57761	172	12.4205	52	4.83615	56	5.87649	131	8.9107	8	50203487	50224245	+	1176	C5orf24
ENSBGRG00000001917	0	0	0	0	0	0	0	0	0	0	0	0	0	0	0	0	0	0	3	9622562	9623166	+	354	-
ENSBGRG00000001918	1	0.0832896	0	0	0	0	0	0	1	0.0873084	0	0	11	0.864286	0	0	0	0	1	64746842	64748233	+	1392	-
ENSBGRG00000001919	0	0	0	0	0	0	0	0	0	0	0	0	0	0	0	0	0	0	5	127957002	127957375	-	201	-
ENSBGRG00000001920	406	19.3869	403	16.236	274	11.5867	523	20.2822	273	13.665	326	11.4022	465	20.9463	358	18.1958	587	19.3391	3	21761182	21781624	-	2428	PI4KB
ENSBGRG00000001921	159	16.8504	82	7.33195	106	9.94828	221	19.0212	68	7.55417	316	24.5295	203	20.2947	102	11.5059	429	31.3681	7	56811717	56820538	-	1094	GRHPR
ENSBGRG00000001923	0	0	0	0	0	0	0	0	0	0	0	0	0	0	0	0	0	0	1	65247619	65358174	+	2230	GAP43
ENSBGRG00000001924	0	0	36	4.68282	22	3.00375	0	0	0	0	20	2.25855	64	9.30821	0	0	0	0	1	87755272	87762237	+	752	CRYGS
ENSBGRG00000001925	33	1.36205	0	0	0	0	0	0	37	1.60083	26	0.786032	0	0	0	0	11	0.313248	6	111867129	111888973	+	2809	LRIT3
ENSBGRG00000001926	0	0	0	0	0	0	0	0	0	0	0	0	0	0	0	0	0	0	7	112847846	112848490	+	534	-
ENSBGRG00000001927	8	4.68441	0	0	0	0	0	0	0	0	21	9.00684	0	0	0	0	0	0	8	87994863	87995236	+	198	-
ENSBGRG00000001929	239	5.31749	255	4.78677	385	7.58576	209	3.77648	239	5.57407	172	2.80302	252	5.28912	250	5.92047	116	1.78067	5	8013918	8226843	-	5211	EPS8
ENSBGRG00000001930	480	25.5513	1153	51.7839	715	33.706	494	21.3566	515	28.7372	460	17.9357	610	30.632	311	17.6214	420	15.4255	2	62771656	62865102	-	2178	GLS
ENSBGRG00000001931	4	0.328207	0	0	0	0	0	0	0	0	16	0.961604	0	0	0	0	0	0	6	60002600	60286436	+	1413	KCTD8
ENSBGRG00000001934	158	12.4615	134	8.91683	129	9.01014	137	8.77537	203	16.7832	123	7.10569	72	5.35697	228	19.1406	70	3.80915	5	20597395	20612192	+	1470	FGFR1OP2
ENSBGRG00000001936	241	11.4046	234	9.34271	176	7.37574	366	14.0662	141	6.99437	615	21.3171	188	8.39258	169	8.51251	627	20.4715	8	6340080	6446091	+	2450	GATAD2A
ENSBGRG00000001937	203	19.4189	145	11.7028	119	10.081	145	11.2649	170	17.0468	246	17.2366	170	15.3409	175	17.8186	228	15.048	8	50233275	50249244	+	1212	TXNDC15
ENSBGRG00000001938	0	0	0	0	0	0	0	0	0	0	0	0	0	0	0	0	0	0	1	87981732	87982751	-	1020	-
ENSBGRG00000001939	0	0	0	0	0	0	15	1.40676	0	0	0	0	0	0	0	0	0	0	6	61374719	61540337	-	1004	GRXCR1
ENSBGRG00000001940	109	5.9836	104	4.81684	78	3.79193	138	6.15244	59	3.39511	115	4.62405	69	3.57321	129	7.5376	141	5.34039	3	21805885	21809851	-	2112	RFX5
ENSBGRG00000001941	121	4.51227	99	3.11485	96	3.17037	103	3.11945	142	5.55089	168	4.58888	25	0.879474	13	0.516012	90	2.31563	1	142426358	142512330	-	3109	MRAS
ENSBGRG00000001942	15001	2318.94	17517	2284.66	8498	1163.36	12677	1591.54	8943	1449.16	11583	1311.53	9227	1345.56	11050	1818.19	10327	1101.44	7	97014711	97018892	-	750	-
ENSBGRG00000001944	0	0	0	0	16	1.51269	0	0	0	0	0	0	27	2.71918	0	0	0	0	1	65439877	66212438	-	1086	LSAMP
ENSBGRG00000001946	0	0	0	0	0	0	0	0	0	0	0	0	0	0	0	0	0	0	3	132144089	132146793	+	1191	GAL3ST2
ENSBGRG00000001948	0	0	0	0	0	0	22	0.83126	0	0	0	0	0	0	0	0	0	0	3	9688785	9696710	+	2492	FCRLA
ENSBGRG00000001949	17	1.05006	45	2.34515	0	0	0	0	0	0	35	1.58351	0	0	0	0	38	1.61945	5	117701973	117710978	-	1877	C22orf23
ENSBGRG00000001951	0	0	0	0	0	0	0	0	0	0	0	0	0	0	0	0	0	0	5	128633626	128634946	+	816	-
ENSBGRG00000001952	0	0	0	0	0	0	0	0	0	0	0	0	0	0	0	0	0	0	7	33940007	33940681	+	625	-
ENSBGRG00000001953	283	10.2119	430	13.0912	420	13.4214	475	13.9202	383	14.4872	500	13.2153	277	9.42916	253	9.71733	308	7.6681	8	87995514	88192447	+	3213	MSH3
ENSBGRG00000001954	440	17.7808	180	6.13713	227	8.12371	593	19.4619	309	13.0895	426	12.6095	280	10.6741	352	15.1408	726	20.242	7	112888716	112942381	-	2869	ZNF395
ENSBGRG00000001955	295	20.9571	516	30.9281	289	18.1818	210	12.1161	221	16.4576	127	6.60849	202	13.5374	138	10.4351	231	11.3224	7	56897782	57180998	-	1632	ZCCHC7
ENSBGRG00000001956	0	0	0	0	0	0	0	0	0	0	0	0	0	0	0	0	0	0	4	55956383	55957154	+	429	-
ENSBGRG00000001957	132	38.9414	89	22.1524	72	18.8105	44	10.542	69	21.3379	87	18.7994	71	19.7592	52	16.3286	6	1.22126	8	50256185	50304314	+	393	PCBD2
ENSBGRG00000001958	1218	27.809	1332	25.6587	761	15.3869	1232	22.8444	817	19.5535	1323	22.1251	1417	30.5198	857	20.8269	1527	24.0544	7	34240143	34339861	+	5078	ZNF462
ENSBGRG00000001959	0	0	0	0	0	0	0	0	0	0	0	0	0	0	0	0	0	0	6	111917897	111918241	-	345	-
ENSBGRG00000001960	0	0	0	0	0	0	0	0	0	0	0	0	0	0	0	0	0	0	3	132154502	132156836	+	1410	NEU4
ENSBGRG00000001962	0	0	0	0	0	0	0	0	0	0	0	0	0	0	0	0	0	0	6	101125462	101127882	-	2421	-
ENSBGRG00000001963	0	0	0	0	0	0	0	0	0	0	7	0.595047	0	0	0	0	0	0	4	56017136	56018631	-	999	HOXA1
ENSBGRG00000001965	2020	56.4466	1879	44.3003	1922	47.563	1785	40.5095	1737	50.8805	1597	32.6874	2070	54.5671	979	29.119	1224	23.5986	6	61778849	62030336	+	4149	ATP8A1
ENSBGRG00000001966	0	0	6	0.517561	4	0.362165	0	0	10	1.07172	0	0	14	1.35026	0	0	0	0	1	142532104	142559397	+	1134	NME9
ENSBGRG00000001967	0	0	0	0	0	0	0	0	0	0	0	0	0	0	0	0	0	0	5	20604226	20604453	-	228	-
ENSBGRG00000001968	216	6.73014	191	5.02108	174	4.80119	182	4.60547	198	6.46697	215	4.90679	83	2.43962	214	7.09727	228	4.90143	3	38665049	38778216	+	3721	-
ENSBGRG00000001970	0	0	0	0	0	0	0	0	0	0	0	0	0	0	0	0	0	0	1	45542798	45544115	+	537	-
ENSBGRG00000001971	0	0	0	0	0	0	0	0	0	0	0	0	0	0	0	0	0	0	6	101164214	101183305	-	1413	-
ENSBGRG00000001972	0	0	0	0	0	0	0	0	0	0	0	0	0	0	0	0	0	0	3	132168910	132182364	-	940	PDCD1
ENSBGRG00000001973	347	11.3454	252	6.9516	324	9.38135	324	8.60337	147	5.03818	471	11.2798	380	11.7206	306	10.6493	710	16.0165	5	128708825	128747272	-	3546	BRD1
ENSBGRG00000001974	373	32.8612	376	27.9483	144	11.2348	286	20.4631	281	25.9505	440	28.3933	415	34.4902	276	25.8815	320	19.451	3	108674336	108699711	-	1316	NSUN4
ENSBGRG00000001975	0	0	0	0	0	0	0	0	0	0	0	0	0	0	0	0	0	0	7	97020219	97021346	-	1128	-
ENSBGRG00000001976	0	0	0	0	0	0	0	0	0	0	0	0	0	0	0	0	0	0	8	6453796	6454617	-	822	TSSK6
ENSBGRG00000001977	0	0	0	0	0	0	0	0	0	0	0	0	0	0	0	0	0	0	6	111982232	112002687	+	699	-
ENSBGRG00000001978	2499	59.7016	4313	86.9345	2404	50.8608	3157	61.2529	1524	38.1654	1757	30.7454	2988	67.3402	1410	35.8547	2048	33.7573	3	56072099	56264696	+	4853	TGFBR3
ENSBGRG00000001979	9	0.867375	8	0.6505	35	2.98718	0	0	14	1.41435	4	0.282366	7	0.636409	0	0	0	0	8	50310061	50344256	+	1203	CATSPER3
ENSBGRG00000001980	67	3.80967	33	1.58314	103	5.18656	68	3.14017	49	2.92061	279	11.62	115	6.16857	50	3.02615	226	8.86623	8	22777060	22784941	+	2039	MOB3A
ENSBGRG00000001981	51	3.73289	69	4.26105	44	2.85205	92	5.46883	106	8.13291	74	3.9673	9	0.621428	80	6.23264	45	2.27251	3	100459129	100486733	+	1584	YIPF1
ENSBGRG00000001982	0	0	8	0.412738	0	0	16	0.794591	0	0	0	0	0	0	23	1.49702	0	0	1	172223733	172241933	-	1896	SGO1
ENSBGRG00000001984	13	0.334861	0	0	0	0	0	0	11	0.297015	0	0	0	0	0	0	43	0.7642	1	88004675	88212421	+	4501	DGKG
ENSBGRG00000001985	100	4.02148	190	6.44662	73	2.59979	133	4.34379	65	2.74008	254	7.48182	58	2.20033	55	2.35426	237	6.57584	3	21825246	21837417	-	2883	SELENBP1
ENSBGRG00000001987	0	0	0	0	0	0	0	0	0	0	0	0	0	0	0	0	0	0	1	45571782	45573124	+	363	-
ENSBGRG00000001988	0	0	0	0	0	0	0	0	0	0	0	0	0	0	0	0	32	0.921437	3	9714310	9723091	+	2778	FCRLB
ENSBGRG00000001989	0	0	0	0	0	0	0	0	2	0.194298	0	0	0	0	0	0	23	1.47068	4	56024799	56026681	-	1251	HOXA2
ENSBGRG00000001991	382	11.7352	542	14.0482	391	10.6374	558	13.9218	344	11.0778	535	12.0384	333	9.65042	282	9.22113	532	11.2761	5	20630277	20671812	-	3774	TM7SF3
ENSBGRG00000001992	8	1.12019	0	0	0	0	22	2.50181	0	0	0	0	0	0	0	0	0	0	7	97049834	97077918	+	828	ACER2
ENSBGRG00000001994	0	0	0	0	0	0	0	0	0	0	0	0	0	0	0	0	0	0	1	45608572	45625777	+	918	-
ENSBGRG00000001995	2	0.301925	5	0.636842	3	0.401069	0	0	26	4.11441	0	0	10	1.42411	13	2.08891	0	0	4	72181134	72324570	+	768	-
ENSBGRG00000001997	436	17.4128	586	19.7457	417	14.7485	611	19.8178	403	16.8715	381	11.1454	434	16.3511	456	19.3845	210	5.78655	7	11070034	11109429	-	2903	DCAF12
ENSBGRG00000001998	2506	236.792	2421	193.007	2590	216.728	2602	199.676	2346	232.369	2649	183.339	1904	169.717	1943	195.418	3033	197.731	7	34612664	34661230	+	1227	RAD23B
ENSBGRG00000001999	98	3.73628	261	8.39551	150	5.06447	329	10.1869	73	2.91744	897	25.0492	292	10.502	248	10.064	133	3.49851	4	56032218	56056176	-	3041	HOXA3
ENSBGRG00000002000	0	0	0	0	0	0	0	0	0	0	0	0	0	0	0	0	0	0	1	68337996	68339075	-	1080	-
ENSBGRG00000002001	0	0	0	0	0	0	0	0	0	0	0	0	0	0	0	0	0	0	3	68521500	68521655	-	156	-
ENSBGRG00000002002	0	0	0	0	0	0	0	0	0	0	0	0	0	0	0	0	0	0	1	45649419	45651033	+	954	-
ENSBGRG00000002004	0	0	0	0	0	0	0	0	0	0	0	0	0	0	0	0	0	0	1	172312899	172314146	-	258	-
ENSBGRG00000002005	70	29.728	14	5.01636	11	4.13704	56	19.3147	14	6.23248	70	21.7748	88	35.2553	72	32.5467	30	8.79035	3	108719573	108729824	-	273	-
ENSBGRG00000002006	0	0	0	0	0	0	0	0	0	0	0	0	0	0	0	0	0	0	6	101197677	101221711	-	1335	-
ENSBGRG00000002007	0	0	0	0	62	4.3661	41	2.64782	0	0	25	1.45613	39	2.92557	23	1.94674	0	0	6	112101231	112239859	-	1458	ELOVL6
ENSBGRG00000002008	59	20.9187	147	43.9737	35	10.9895	21	6.04691	35	13.0082	72	18.6983	33	11.0375	38	14.3408	0	0	1	68571675	68572492	-	327	-
ENSBGRG00000002010	0	0	0	0	0	0	0	0	0	0	8	0.568989	0	0	1	0.103355	0	0	3	132189476	132190669	+	1194	-
ENSBGRG00000002012	0	0	0	0	0	0	0	0	0	0	0	0	0	0	0	0	0	0	1	45669652	45670590	+	939	-
ENSBGRG00000002013	55	6.52677	81	8.10986	53	5.56981	86	8.28831	40	4.97578	120	10.4305	19	2.12698	24	3.03147	188	15.3926	5	117711597	117726698	+	977	-
ENSBGRG00000002014	0	0	0	0	0	0	0	0	0	0	82	5.25156	36	2.96936	0	0	0	0	8	50365262	50373767	-	1326	PITX1
ENSBGRG00000002015	65	2.50035	96	3.11567	32	1.0901	75	2.34304	25	1.00807	183	5.15616	219	7.94703	0	0	91	2.41516	8	6454616	6476813	+	3014	YJEFN3
ENSBGRG00000002016	14	0.881667	55	2.92235	16	0.89233	36	1.84124	33	2.17849	42	1.93738	38	2.25753	66	4.42412	11	0.477955	4	56058335	56070465	-	1841	HOXA4
ENSBGRG00000002017	0	0	0	0	0	0	0	0	0	0	0	0	0	0	0	0	0	0	7	113015175	113043768	+	1922	-
ENSBGRG00000002018	203	8.54289	250	8.87649	184	6.85734	217	7.41652	306	13.4988	132	4.06884	282	11.1952	274	12.2734	324	9.40743	3	100513637	100572904	+	2755	NDC1
ENSBGRG00000002019	0	0	0	0	0	0	0	0	0	0	0	0	0	0	0	0	0	0	3	132193400	132196772	+	1557	-
ENSBGRG00000002021	16	0.734083	44	1.70322	36	1.4627	14	0.521657	2	0.0961878	30	1.00817	14	0.605936	4	0.19534	79	2.50075	3	9748078	9758940	+	2527	DUSP12
ENSBGRG00000002022	0	0	0	0	0	0	0	0	12	0.769198	0	0	0	0	0	0	0	0	7	97135583	97445370	-	1896	SLC24A2
ENSBGRG00000002023	111	3.82899	198	5.76262	202	6.17081	173	4.84663	220	7.95517	65	1.64234	30	0.97624	118	4.33262	38	0.904405	1	172325928	172339937	-	3361	ZNF596
ENSBGRG00000002024	649	18.8488	595	14.5797	396	10.1851	710	16.7467	377	11.4775	982	20.89	641	17.5619	435	13.4473	1025	20.5391	8	22805857	22822793	+	3992	MKNK2
ENSBGRG00000002025	190	6.02034	197	5.26656	90	2.52545	268	6.89659	37	1.22895	287	6.66098	164	4.90213	195	6.57672	669	14.6255	7	113144399	113218398	+	3659	EXTL3
ENSBGRG00000002027	0	0	0	0	0	0	0	0	0	0	0	0	0	0	0	0	0	0	1	45675396	45676532	+	930	-
ENSBGRG00000002028	204	12.0918	296	14.8029	213	11.1807	340	16.3671	295	18.3294	326	14.1536	243	13.5876	289	18.2333	246	10.0604	4	73055392	73158272	+	1956	MDFIC
ENSBGRG00000002029	1012	36.7692	1212	37.1534	808	25.9982	818	24.1373	1004	38.2386	907	24.1379	779	26.7002	920	35.5794	586	14.6899	1	142567061	142685677	-	3191	ARMC8
ENSBGRG00000002031	8	0.798204	25	2.10454	23	2.03227	34	2.75508	6	0.627539	13	0.95007	12	1.12948	0	0	130	8.94921	4	56072096	56074268	-	1162	HOXA5
ENSBGRG00000002033	14	7.21399	1	0.434751	0	0	0	0	0	0	0	0	0	0	0	0	0	0	6	112248872	112249096	+	225	-
ENSBGRG00000002034	0	0	0	0	0	0	0	0	0	0	0	0	0	0	0	0	0	0	3	132216364	132219263	-	273	FAM240C
ENSBGRG00000002035	141	5.80313	295	10.2437	182	6.63352	162	5.4149	102	4.40057	81	2.44184	251	9.7452	162	7.09684	265	7.525	7	34791269	34796361	-	2817	KLF4
ENSBGRG00000002036	0	0	2	0.13483	0	0	0	0	9	0.753825	0	0	0	0	3	0.255147	0	0	3	69928535	69930134	+	1451	-
ENSBGRG00000002037	0	0	0	0	0	0	0	0	0	0	0	0	0	0	0	0	0	0	6	112266204	112267427	-	1224	-
ENSBGRG00000002038	57	11.3744	20	3.36726	23	4.06454	10	1.62064	13	2.71933	74	10.8162	98	18.4482	8	1.69923	0	0	3	108722082	108723967	-	581	-
ENSBGRG00000002039	45	2.34695	60	2.64019	101	4.66489	169	7.15829	45	2.46019	115	4.39316	13	0.639599	31	1.72091	369	13.2781	4	56076914	56080506	-	2223	HOXA6
ENSBGRG00000002041	0	0	0	0	0	0	0	0	0	0	0	0	0	0	0	0	0	0	1	45699721	45701249	+	930	-
ENSBGRG00000002042	490	26.4973	559	25.5041	369	17.671	566	24.8573	314	17.7992	630	24.9537	446	22.7517	478	27.5131	554	20.6696	7	11165796	11241610	+	2144	UBAP1
ENSBGRG00000002044	105	3.84026	17	0.524581	179	5.79766	122	3.62379	69	2.64536	216	5.78646	123	4.24375	182	7.08515	338	8.52914	5	77300771	77359834	-	3170	FMNL3
ENSBGRG00000002046	75	21.1568	128	30.4643	0	0	10	2.29097	0	0	51	10.5377	0	0	114	34.2295	53	10.3153	3	132300149	132300559	-	411	-
ENSBGRG00000002048	11	1.7787	75	10.2321	42	6.01436	46	6.04089	16	2.71204	0	0	0	0	20	3.44229	31	3.45852	4	56088823	56091781	-	717	HOXA7
ENSBGRG00000002049	1	0.0784433	4	0.264733	0	0	0	0	0	0	1	0.0574571	0	0	0	0	5	0.27061	3	70031516	70034630	+	1478	-
ENSBGRG00000002052	0	0	0	0	0	0	0	0	0	0	0	0	0	0	0	0	0	0	2	72482	75177	+	498	SRARP
ENSBGRG00000002053	6	0.273119	0	0	1	0.0403116	0	0	0	0	0	0	0	0	0	0	32	1.00501	7	57228551	57441670	+	2547	PAX5
ENSBGRG00000002054	517	21.1729	581	20.0752	330	11.9683	862	28.6701	346	14.8536	1131	33.9267	779	30.0955	214	9.32848	1744	49.2781	3	108730268	108769159	+	2831	LRRC41
ENSBGRG00000002055	183	4.91472	153	3.46683	306	7.27778	319	6.95778	160	4.50436	134	2.63597	291	7.3725	286	8.17563	288	5.33652	8	88246043	88550659	+	4317	RASGRF2
ENSBGRG00000002057	0	0	0	0	0	0	0	0	0	0	0	0	0	0	0	0	0	0	3	70226447	70227319	+	420	-
ENSBGRG00000002058	5	0.707809	0	0	9	1.12828	0	0	0	0	0	0	10	1.33543	0	0	50	4.88353	4	56099962	56101859	-	819	HOXA9
ENSBGRG00000002059	39	3.52426	29	2.21103	25	2.00066	12	0.880677	38	3.59958	44	2.91236	21	1.79018	100	9.61857	0	0	4	74218828	74371997	-	1283	TFEC
ENSBGRG00000002060	9	0.456653	0	0	0	0	39	1.60709	24	1.2765	0	0	0	0	0	0	0	0	1	68999893	69199879	-	2285	IGSF11
ENSBGRG00000002062	0	0	0	0	0	0	0	0	0	0	0	0	0	0	0	0	0	0	1	45759813	45760742	+	930	-
ENSBGRG00000002063	303	27.4022	516	39.3717	602	48.2134	1153	84.6844	584	55.3631	682	45.1767	497	42.4006	350	33.6912	257	16.0359	2	88956	92522	-	1282	HSPB7
ENSBGRG00000002068	295	38.1719	284	31.0051	391	44.8052	199	20.9126	305	41.3702	399	37.8167	187	22.8264	335	46.1396	448	39.9961	5	20672362	20700354	+	896	MED21
ENSBGRG00000002069	369	17.0512	310	12.086	230	9.4121	350	13.135	215	10.4144	450	15.2311	188	8.19523	247	12.1488	267	8.51252	7	113237334	113378816	-	2509	INTS9
ENSBGRG00000002070	0	0	0	0	0	0	0	0	0	0	0	0	0	0	0	0	0	0	3	100599788	100902435	+	3532	GLIS1
ENSBGRG00000002071	114	7.29821	162	8.75023	214	12.1326	72	3.74349	120	8.05301	78	3.65759	63	3.80475	104	7.08683	65	2.87106	3	56419457	56445980	-	1811	CDC7
ENSBGRG00000002072	0	0	0	0	0	0	0	0	0	0	0	0	0	0	0	0	0	0	4	56109427	56121696	-	1777	hoxA10
ENSBGRG00000002073	271	7.80803	169	4.1082	205	5.23064	324	7.58139	140	4.2283	342	7.21749	208	5.65339	85	2.60674	302	6.00339	8	50733355	50832219	-	4024	MACROH2A1
ENSBGRG00000002074	60	3.03771	24	1.02518	42	1.8831	55	2.26146	95	5.04177	57	2.11377	116	5.54021	94	5.06558	48	1.67669	7	97956320	98260088	-	2290	MLLT3
ENSBGRG00000002075	91	3.92211	96	3.49094	154	5.87797	191	6.68564	91	4.11135	332	10.481	101	4.10651	310	14.2215	116	3.44948	3	70994485	71141951	+	2690	ADGRL4
ENSBGRG00000002076	19	0.736245	75	2.45201	53	1.81875	60	1.88822	48	1.94973	104	2.95182	153	5.59286	219	9.03274	84	2.24577	6	112483757	112572178	+	2992	ENPEP
ENSBGRG00000002077	0	0	0	0	0	0	0	0	0	0	0	0	0	0	0	0	0	0	4	56124578	56128205	-	2212	HOXA11
ENSBGRG00000002078	0	0	0	0	0	0	0	0	0	0	0	0	0	0	0	0	0	0	1	45784287	45785219	+	933	-
ENSBGRG00000002079	97	3.88869	166	5.61478	37	1.3136	284	9.2466	92	3.8662	234	6.87125	57	2.15566	28	1.1948	356	9.8469	3	38738407	38750193	+	2892	-
ENSBGRG00000002080	5	0.219001	0	0	18	0.698197	0	0	0	0	0	0	0	0	0	0	51	1.54122	2	95972	111582	+	2647	-
ENSBGRG00000002082	77	7.00731	161	12.3617	45	3.62662	103	7.61254	80	7.6316	115	7.66561	172	14.766	38	3.68088	138	8.66478	5	47731600	47759186	-	1274	RNF41
ENSBGRG00000002083	0	0	0	0	0	0	0	0	0	0	6	0.187603	0	0	0	0	0	0	3	108749836	108780610	-	2716	RAD54L
ENSBGRG00000002084	0	0	0	0	0	0	0	0	0	0	0	0	0	0	0	0	0	0	6	101306655	101405361	+	1463	C4orf17
ENSBGRG00000002085	2	0.0483684	0	0	0	0	0	0	0	0	0	0	0	0	0	0	0	0	3	56563466	56684194	+	4794	HFM1
ENSBGRG00000002087	0	0	0	0	0	0	0	0	0	0	0	0	0	0	0	0	0	0	6	61890833	61892187	-	297	-
ENSBGRG00000002088	5	0.14108	0	0	10	0.249875	34	0.779121	4	0.118309	0	0	0	0	0	0	0	0	5	85471081	85563181	-	4109	PLEKHG7
ENSBGRG00000002089	870	39.8684	690	26.6779	605	24.5524	608	22.6279	697	33.4817	699	23.4625	550	23.7764	658	32.0954	613	19.3815	3	9765918	10020636	+	2530	ATF6
ENSBGRG00000002090	0	0	0	0	0	0	0	0	0	0	0	0	0	0	0	0	0	0	1	45805711	45819853	+	939	-
ENSBGRG00000002091	0	0	0	0	0	0	0	0	0	0	0	0	0	0	0	0	0	0	3	100950758	100960566	-	2270	DMRTB1
ENSBGRG00000002092	0	0	0	0	0	0	0	0	0	0	0	0	0	0	0	0	0	0	4	56143213	56145094	-	1068	HOXA13
ENSBGRG00000002093	21	0.46669	42	0.787502	0	0	15	0.270728	0	0	0	0	145	3.03984	0	0	0	0	4	17064	116522	+	5217	MGAM
ENSBGRG00000002094	0	0	0	0	0	0	0	0	0	0	0	0	0	0	0	0	0	0	2	63140258	63142750	-	594	-
ENSBGRG00000002095	97	8.15526	310	21.9898	165	12.2851	149	10.1738	63	5.55228	84	5.17289	248	19.6694	35	3.13214	28	1.62421	4	74527155	74591802	+	1379	TES
ENSBGRG00000002096	140	80.7536	123	59.8594	78	39.8435	109	51.0614	210	126.975	173	73.0918	171	93.0473	32	19.6468	3	1.19391	6	62033150	62033690	+	201	-
ENSBGRG00000002097	0	0	0	0	0	0	0	0	0	0	0	0	0	0	0	0	0	0	1	69220244	69225202	+	1326	-
ENSBGRG00000002099	0	0	0	0	10	1.28182	0	0	0	0	1	0.10602	0	0	0	0	0	0	3	21875785	21883528	+	801	-
ENSBGRG00000002100	29	2.2296	133	8.62727	69	4.69794	152	9.49083	92	7.4145	141	7.94029	64	4.64176	52	4.25539	87	4.61494	5	47761345	47767150	+	1508	NABP2
ENSBGRG00000002101	80	4.49812	40	1.89755	2	0.0995865	58	2.64851	11	0.648335	95	3.91249	71	3.76594	15	0.897717	72	2.79313	8	14941392	14948598	+	2062	SHFL
ENSBGRG00000002102	1462	18.4946	1279	13.6509	1036	11.6061	2135	21.9345	713	9.4548	6102	56.5403	988	11.7904	1075	14.4748	7027	61.3317	5	111349180	111492772	+	9165	VWF
ENSBGRG00000002104	0	0	0	0	0	0	0	0	0	0	0	0	0	0	0	0	0	0	6	101315498	101329874	-	1044	ADH7
ENSBGRG00000002106	380	55.2784	699	85.791	487	62.7379	410	48.4382	318	48.4913	727	77.463	337	46.2461	646	100.026	460	46.1687	4	74853486	74859507	+	797	CAV2
ENSBGRG00000002107	25	5.3379	0	0	18	3.40355	0	0	24	5.37164	13	2.03311	25	5.03552	0	0	28	4.12483	5	20732988	20735273	+	543	-
ENSBGRG00000002108	0	0	0	0	0	0	0	0	0	0	0	0	0	0	0	0	0	0	1	45882410	45883794	+	1385	OR5K4
ENSBGRG00000002110	723	64.5297	712	53.6159	523	41.3382	1040	75.3852	459	42.9436	1749	114.34	882	74.2614	411	39.0454	1886	116.14	3	21924043	21926374	+	1299	PSMB4
ENSBGRG00000002112	183	19.0457	152	13.3469	168	15.484	34	2.8738	58	6.32759	8	0.60985	57	5.5962	31	3.4341	182	13.0687	3	38792037	38795578	-	1114	GSTM3
ENSBGRG00000002113	0	0	15	1.12522	0	0	4	0.288831	10	0.932004	0	0	0	0	19	1.7981	0	0	6	62042657	62046814	-	1304	SHISA3
ENSBGRG00000002114	0	0	3	0.295526	4	0.41359	10	0.948228	4	0.48956	0	0	1	0.110142	2	0.248552	4	0.322224	7	35921984	35924733	-	993	-
ENSBGRG00000002115	0	0	0	0	0	0	0	0	0	0	0	0	0	0	0	0	0	0	5	20749038	20750632	-	141	-
ENSBGRG00000002116	0	0	0	0	0	0	0	0	0	0	0	0	0	0	0	0	0	0	1	45907862	45908788	+	927	-
ENSBGRG00000002117	0	0	0	0	0	0	0	0	0	0	0	0	0	0	0	0	0	0	4	56190570	56193936	+	1215	EVX1
ENSBGRG00000002119	0	0	0	0	0	0	0	0	0	0	0	0	0	0	0	0	0	0	1	45933366	45934295	+	930	-
ENSBGRG00000002120	0	0	0	0	0	0	0	0	0	0	0	0	0	0	0	0	0	0	6	62309094	62342668	+	1605	BEND4
ENSBGRG00000002121	0	0	0	0	0	0	0	0	0	0	0	0	0	0	0	0	0	0	5	20759785	20761329	-	1545	-
ENSBGRG00000002123	0	0	17	4.29696	0	0	7	1.70314	9	2.82636	17	3.73041	0	0	0	0	28	5.78755	7	98191748	98193045	-	387	-
ENSBGRG00000002125	0	0	0	0	0	0	0	0	0	0	25	0.515802	0	0	0	0	0	0	1	69251471	69284402	+	4116	UPK1B
ENSBGRG00000002126	0	0	0	0	0	0	0	0	0	0	0	0	0	0	0	0	0	0	4	100546443	100547537	+	1095	-
ENSBGRG00000002127	88	3.69126	140	4.95465	66	2.45169	487	16.5903	135	5.93596	349	10.7227	672	26.591	174	7.7687	381	11.0264	3	10056636	10113995	-	2764	OLFML2B
ENSBGRG00000002130	8	0.213221	86	1.93389	3	0.0708095	15	0.324686	0	0	0	0	0	0	0	0	713	13.1114	8	6476558	6489564	+	4350	CILP2
ENSBGRG00000002131	0	0	0	0	0	0	0	0	0	0	0	0	0	0	0	0	0	0	1	46019301	46020227	+	927	-
ENSBGRG00000002132	0	0	0	0	0	0	0	0	0	0	0	0	0	0	0	0	0	0	7	36251402	36252655	-	1254	ACTL7B
ENSBGRG00000002133	14	0.286725	0	0	0	0	0	0	26	0.558182	70	1.05008	0	0	21	0.457787	26	0.36739	7	11242598	11293438	-	5661	KIF24
ENSBGRG00000002134	1130	39.3427	1482	43.5338	1316	40.5762	968	27.3712	870	31.7519	1115	28.4347	743	24.4033	1598	59.2202	676	16.2387	4	74882453	74972716	+	3330	CAV1
ENSBGRG00000002135	213	15.9735	187	11.8319	352	23.3772	212	12.9118	226	17.7662	222	12.1944	322	22.7798	260	20.754	112	5.79504	5	20848672	20925253	+	1546	STK38L
ENSBGRG00000002136	0	0	0	0	0	0	0	0	0	0	0	0	0	0	0	0	21	0.455487	5	47766617	47773290	+	3688	SLC39A5
ENSBGRG00000002137	0	0	0	0	0	0	20	2.61553	0	0	8	0.943574	0	0	0	0	16	1.7776	3	108810703	108823703	-	720	LURAP1
ENSBGRG00000002139	2503	135.479	4262	194.633	2211	105.981	1494	65.674	1399	79.3768	1187	47.0597	1348	68.8294	824	47.4728	1033	38.577	5	86169845	86172931	+	2142	-
ENSBGRG00000002140	6	0.307803	39	1.68803	17	0.772324	25	1.04158	5	0.268879	9	0.338184	12	0.580733	58	3.16706	77	2.7254	5	128820434	128830821	-	2260	ALG12
ENSBGRG00000002141	478	17.8483	495	15.5943	630	20.8323	494	14.9805	410	16.0479	524	14.3314	373	13.1387	392	15.5798	320	8.24396	6	62382942	62473128	-	3105	SLC30A9
ENSBGRG00000002143	1458	104.798	1743	105.703	1533	97.5814	1594	93.0499	1244	93.7306	2674	140.781	1663	112.762	1640	125.472	1825	90.5058	4	56281078	56554772	-	1613	HIBADH
ENSBGRG00000002144	17	1.36778	0	0	0	0	44	2.87509	7	0.590377	71	4.1842	0	0	0	0	0	0	5	117727973	117739203	-	1441	SOX10
ENSBGRG00000002145	0	0	0	0	0	0	0	0	0	0	0	0	0	0	0	0	0	0	7	36254950	36256266	+	1317	ACTL7A
ENSBGRG00000002146	0	0	0	0	0	0	0	0	3	0.109786	0	0	0	0	0	0	0	0	1	94021994	94083512	+	3321	CCDC39
ENSBGRG00000002147	682	12.2666	558	8.46773	517	8.23492	671	9.80154	431	8.1261	509	6.70573	653	11.0797	694	13.2864	432	5.36094	7	98356944	98680333	+	6446	FOCAD
ENSBGRG00000002149	0	0	0	0	0	0	0	0	0	0	0	0	0	0	0	0	0	0	3	38798239	38809577	-	2084	EPS8L3
ENSBGRG00000002150	14	0.98492	64	3.79879	6	0.373812	38	2.17114	24	1.7699	0	0	49	3.25194	58	4.34318	6	0.291234	3	71379839	71400304	-	1648	-
ENSBGRG00000002151	51	5.01518	128	10.6199	47	4.09301	43	3.43413	27	2.78321	22	1.58463	0	0	37	3.8728	14	0.949865	6	101418922	101440996	-	1179	TRMT10A
ENSBGRG00000002152	0	0	0	0	0	0	0	0	0	0	0	0	0	0	0	0	0	0	5	87202047	87203414	-	1368	-
ENSBGRG00000002153	604	28.7823	732	29.4301	860	36.2924	517	20.0083	413	20.6302	659	23.0018	367	16.4979	838	42.5049	430	14.1375	1	46060763	46068192	-	2433	CLDND1
ENSBGRG00000002154	0	0	0	0	0	0	0	0	0	0	0	0	0	0	0	0	0	0	4	101711867	101713012	+	1146	PRPS1L1
ENSBGRG00000002155	727	30.6836	359	12.7838	234	8.74614	402	13.7794	216	9.55631	771	23.8349	437	17.3991	258	11.5904	536	15.6082	2	63400227	63469197	-	2747	-
ENSBGRG00000002156	0	0	0	0	0	0	0	0	0	0	0	0	0	0	0	0	0	0	2	134587963	134589483	+	1521	-
ENSBGRG00000002157	0	0	0	0	0	0	0	0	0	0	0	0	0	0	0	0	32	1.82318	8	14948892	14952807	-	1404	ANGPTL6
ENSBGRG00000002158	619	22.4832	582	17.8354	726	23.3525	463	13.6578	502	19.1133	491	13.0628	484	16.5839	695	26.8695	593	14.8607	7	113462195	113582717	+	3192	HMBOX1
ENSBGRG00000002159	0	0	0	0	0	0	28	0.768421	0	0	0	0	0	0	0	0	0	0	8	6503798	6567475	-	3431	PBX4
ENSBGRG00000002160	0	0	19	0.543757	0	0	7	0.192836	19	0.67558	0	0	24	0.767968	0	0	0	0	3	101105069	101197450	+	3418	LRP8
ENSBGRG00000002161	182	5.9389	198	5.45121	97	2.80308	262	6.94334	165	5.64396	497	11.879	402	12.3747	155	5.38361	745	16.7729	3	108825786	108837946	+	3553	POMGNT1
ENSBGRG00000002162	469	13.5735	753	18.3868	783	20.0683	737	17.3228	496	15.0476	762	16.1533	512	13.9786	398	12.2605	636	12.6997	7	36263573	36327329	-	4006	ELP1
ENSBGRG00000002163	971	21.4678	1023	19.0825	665	13.0202	1008	18.0992	711	16.4779	622	10.0727	729	15.2044	475	11.1781	883	13.4693	3	21929837	21977506	-	5244	POGZ
ENSBGRG00000002164	2649	138.344	4882	215.114	1000	46.2494	3620	153.539	1432	78.3945	8051	307.975	4301	211.895	2968	164.986	5587	201.314	8	88571629	88589791	+	2220	CKMT2
ENSBGRG00000002166	104	9.12769	157	11.6257	149	11.5809	110	7.84065	60	5.52006	163	10.4786	81	6.70635	30	2.80256	114	6.90319	1	69295492	69328880	-	1321	B4GALT4
ENSBGRG00000002167	993	24.5894	1030	21.5193	991	21.7321	816	16.4105	974	25.2827	676	12.2612	776	18.1273	906	23.88	493	8.42293	4	101817314	101978817	+	4682	SNX13
ENSBGRG00000002168	858	64.8896	2020	128.894	1304	87.3363	2480	152.325	746	59.1415	1983	109.85	1314	93.7469	608	48.9439	2277	118.814	5	87218845	87259467	+	1533	DCN
ENSBGRG00000002171	93	5.40198	123	6.02792	71	3.65222	56	2.64174	77	4.68841	105	4.46732	17	0.93152	26	1.6075	13	0.520991	1	142697835	142711265	+	1996	DBR1
ENSBGRG00000002173	46	2.00874	92	3.38958	63	2.43633	87	3.08544	63	2.88384	97	3.1026	108	4.44901	224	10.4117	10	0.301289	3	71412244	71431375	-	2655	IFI44L
ENSBGRG00000002174	33	11.4895	14	4.11251	22	6.78325	64	18.0966	51	18.6132	101	25.757	0	0	7	2.59412	34	8.16737	8	22863801	22864355	-	333	-
ENSBGRG00000002176	0	0	35	2.83886	3	0.255407	6	0.468453	2	0.201548	1	0.070416	2	0.181379	1	0.102327	0	0	2	65421080	65422863	-	1206	-
ENSBGRG00000002177	5	0.67485	41	4.66889	63	7.5302	26	2.84998	3	0.424447	25	2.47153	33	4.2017	59	8.4761	0	0	7	98698779	98728126	-	859	HACD4
ENSBGRG00000002179	15	0.654284	5	0.184009	17	0.656679	58	2.05464	4	0.182894	88	2.81155	0	0	48	2.22855	21	0.631993	5	128831608	128840391	+	2658	CRELD2
ENSBGRG00000002180	851	22.6502	883	19.8288	729	17.183	853	18.4384	357	9.96037	1042	20.3141	712	17.8771	984	27.8769	755	13.8646	1	69361958	69496669	+	4356	ARHGAP31
ENSBGRG00000002181	1086	67.2596	1270	66.3622	901	49.4172	1132	56.9381	953	61.8703	1203	54.573	961	56.1463	1109	73.1076	2023	86.4446	5	8384010	8406693	+	1872	STRAP
ENSBGRG00000002183	0	0	8	3.03315	10	3.9796	6	2.18975	16	7.53695	107	35.2194	0	0	0	0	0	0	3	56592080	56592591	-	258	-
ENSBGRG00000002184	0	0	1	0.0976237	0	0	0	0	0	0	0	0	0	0	0	0	0	0	2	33864276	33865277	-	1002	-
ENSBGRG00000002186	727	24.7178	1081	31.0095	1319	39.7146	831	22.9461	884	31.506	658	16.3866	825	26.4608	716	25.9117	295	6.92015	2	134954467	135007525	+	3410	DNAJC10
ENSBGRG00000002187	0	0	0	0	0	0	0	0	0	0	0	0	0	0	0	0	0	0	2	112430	138972	-	2110	FAM131C
ENSBGRG00000002188	220	25.1049	255	24.551	255	25.7695	184	17.0524	165	19.7372	202	16.884	104	11.1955	140	17.0048	343	27.0052	8	88609506	88617610	+	1016	ZCCHC9
ENSBGRG00000002189	0	0	0	0	0	0	0	0	0	0	0	0	0	0	0	0	0	0	2	34998940	34999327	+	168	TNP1
ENSBGRG00000002190	100	5.77962	122	5.94911	54	2.7639	191	8.96529	66	3.9986	190	8.04343	180	9.81399	115	7.07463	85	3.3895	8	14956941	14965058	+	2006	PPAN
ENSBGRG00000002191	46	2.64544	0	0	86	4.37993	89	4.15682	0	0	30	1.26371	42	2.27857	19	1.16305	70	2.77751	5	117821372	117842061	+	2016	PICK1
ENSBGRG00000002193	296	13.0437	211	7.84485	278	10.8488	225	8.05237	227	10.4858	365	11.7812	174	7.23323	394	18.4804	164	4.98621	4	102519970	102578337	-	2631	AHR
ENSBGRG00000002194	67	1.57086	41	0.811037	47	0.975867	78	1.48522	28	0.688156	119	2.04361	138	3.05223	18	0.449204	276	4.46468	3	10184904	10591794	+	4945	-
ENSBGRG00000002196	25	0.778533	46	1.20861	12	0.330939	0	0	0	0	0	0	33	0.969448	0	0	0	0	6	101461280	101523137	+	3723	MTTP
ENSBGRG00000002199	0	0	0	0	0	0	0	0	0	0	0	0	0	0	1	0.113321	0	0	1	46077328	46078416	+	1089	GPR15
ENSBGRG00000002201	0	0	0	0	0	0	0	0	0	0	0	0	0	0	0	0	0	0	7	98711250	98712527	+	1278	-
ENSBGRG00000002204	266	96.9806	386	118.736	245	79.104	192	56.8507	231	88.2836	155	41.3926	165	56.7493	203	78.7782	269	67.6664	3	56909839	56973915	+	318	-
ENSBGRG00000002205	0	0	0	0	0	0	0	0	0	0	25	0.446486	0	0	0	0	0	0	2	65566287	66697092	-	4755	CNTNAP5
ENSBGRG00000002206	327	15.8363	313	12.7892	271	11.6226	363	14.2772	149	7.5641	272	9.64857	438	20.0103	249	12.8355	134	4.47743	7	113707321	113847233	-	2394	-
ENSBGRG00000002209	0	0	0	0	0	0	0	0	0	0	0	0	0	0	0	0	0	0	7	98712914	98714434	+	1521	-
ENSBGRG00000002210	0	0	0	0	0	0	7	0.389087	0	0	0	0	0	0	0	0	0	0	3	71499158	71575727	-	1694	PTGFR
ENSBGRG00000002211	419	18.8435	412	15.6328	310	12.3463	372	13.587	323	15.227	481	15.8446	238	10.0971	210	10.0525	611	18.9586	6	62505267	62521924	-	2578	TMEM33
ENSBGRG00000002215	91	4.48956	170	7.07627	172	7.51484	223	8.93509	146	7.55058	162	5.85417	84	3.90945	142	7.45689	94	3.19969	1	46129945	46144327	-	2350	CPOX
ENSBGRG00000002216	100	3.03824	46	1.17916	75	2.01796	75	1.85061	53	1.68796	278	6.18664	143	4.09856	167	5.40064	131	2.74606	2	186011	221572	-	3816	EPHA2
ENSBGRG00000002217	0	0	0	0	0	0	0	0	19	1.64117	0	0	0	0	0	0	0	0	2	35162855	35164261	+	1407	-
ENSBGRG00000002218	0	0	0	0	0	0	0	0	0	0	0	0	0	0	0	0	0	0	7	98760442	98761002	-	561	-
ENSBGRG00000002219	0	0	0	0	0	0	0	0	0	0	0	0	0	0	0	0	0	0	5	20937004	21044282	+	1904	ARNTL2
ENSBGRG00000002220	1184	25.2292	1037	18.6433	1639	30.9285	1345	23.2759	1795	40.0942	1220	19.0414	1198	24.0814	943	21.388	1216	17.8773	4	75067962	75188482	+	5441	MET
ENSBGRG00000002223	0	0	0	0	0	0	0	0	0	0	0	0	0	0	0	0	0	0	3	71886384	71888753	-	1248	-
ENSBGRG00000002225	0	0	0	0	0	0	0	0	0	0	0	0	0	0	0	0	0	0	1	142762431	142767804	+	1023	A4GNT
ENSBGRG00000002226	0	0	0	0	0	0	0	0	0	0	0	0	0	0	0	0	0	0	8	88628601	88671467	-	1735	ACOT12
ENSBGRG00000002227	0	0	0	0	0	0	0	0	1	0.0343703	0	0	0	0	0	0	0	0	8	6569679	6573992	-	3536	LPAR2
ENSBGRG00000002228	1278	61.0759	2519	101.569	1461	61.8328	6408	178.71	1956	97.9881	5364	187.766	5521	248.903	1406	111.521	4278	141.058	2	35211000	35238586	+	2426	IGFBP5
ENSBGRG00000002229	302	22.0767	550	33.9221	273	17.6733	331	19.6511	307	23.525	287	15.3673	394	27.1705	323	25.1325	196	9.88554	1	69508987	69540013	-	1586	TMEM39A
ENSBGRG00000002231	0	0	0	0	0	0	0	0	0	0	0	0	0	0	0	0	0	0	7	98782858	98783325	-	468	-
ENSBGRG00000002232	0	0	0	0	0	0	0	0	0	0	0	0	0	0	0	0	0	0	8	50891221	50896262	-	973	-
ENSBGRG00000002233	17	1.18163	32	1.87662	12	0.73866	14	0.790304	7	0.510032	88	4.48028	14	0.917985	0	0	31	1.48667	3	71935087	72044692	-	1668	GIPC2
ENSBGRG00000002236	0	0	0	0	0	0	0	0	0	0	0	0	0	0	0	0	0	0	6	62698448	62702380	+	942	PHOX2B
ENSBGRG00000002237	160	7.62131	150	6.02828	101	4.2605	181	7.00197	92	4.5937	282	9.83891	144	6.47062	73	3.70117	443	14.559	5	128877007	128881387	+	2434	PIM3
ENSBGRG00000002238	340	15.1788	114	4.29394	220	8.69781	465	16.8594	121	5.66251	936	30.6071	567	23.8789	237	11.2619	389	11.9819	6	112642892	112660800	-	2597	PITX2
ENSBGRG00000002239	0	0	0	0	0	0	0	0	0	0	0	0	0	0	0	0	0	0	7	98785283	98785843	-	561	-
ENSBGRG00000002241	261	12.9317	414	17.3064	306	13.4266	502	20.1999	217	11.2704	553	20.0691	423	19.771	171	9.01815	506	17.2975	8	22899663	22929974	+	2340	SEPTIN8
ENSBGRG00000002242	0	0	17	1.39977	0	0	10	0.792585	0	0	0	0	0	0	0	0	21	1.414	2	35250248	35281431	-	1188	IGFBP2
ENSBGRG00000002243	43	3.75688	40	2.94857	3	0.232118	52	3.68973	23	2.10646	64	4.09569	73	6.01666	28	2.6039	165	9.94628	7	11320603	11329963	+	1327	NUDT2
ENSBGRG00000002244	220	8.81058	161	5.44002	206	7.30597	203	6.60252	35	1.46931	281	8.24283	250	9.44485	200	8.52547	172	4.75256	5	8420224	8553656	+	2895	DERA
ENSBGRG00000002248	0	0	0	0	0	0	0	0	0	0	0	0	0	0	0	0	0	0	7	98819765	98820325	-	561	-
ENSBGRG00000002249	0	0	0	0	9	0.329787	23	0.772897	32	1.38796	49	1.48507	46	1.79553	17	0.748717	26	0.742255	1	142799065	142837705	+	2802	DZIP1L
ENSBGRG00000002250	34	6.98924	29	5.0297	33	6.0075	117	19.533	61	13.1446	105	15.8099	71	13.7684	22	4.81372	72	10.2118	7	36331163	36336716	+	564	ABITRAM
ENSBGRG00000002253	0	0	0	0	0	0	0	0	0	0	0	0	0	0	0	0	0	0	3	72043713	72044298	+	348	-
ENSBGRG00000002254	0	0	0	0	0	0	0	0	0	0	0	0	0	0	0	0	0	0	8	51002582	51003319	-	738	-
ENSBGRG00000002255	0	0	0	0	0	0	0	0	0	0	0	0	0	0	0	0	0	0	7	98850642	98850827	+	186	-
ENSBGRG00000002256	492	15.2805	455	11.9228	260	7.15113	568	14.3269	300	9.76694	748	17.0162	676	19.8058	412	13.62	711	15.2356	5	47779817	47792007	-	3733	ANKRD52
ENSBGRG00000002259	0	0	34	0.663047	0	0	0	0	17	0.411895	0	0	0	0	0	0	31	0.49437	3	22026201	22055006	+	5016	-
ENSBGRG00000002260	1039	33.3779	1634	44.2882	1190	33.8547	936	24.4203	1141	38.4232	981	23.0834	1024	31.0325	1323	45.2387	686	15.2049	4	56633337	56723574	+	3609	TAX1BP1
ENSBGRG00000002261	0	0	0	0	0	0	0	0	0	0	0	0	0	0	0	0	0	0	7	98852321	98852881	-	561	-
ENSBGRG00000002262	0	0	0	0	0	0	0	0	0	0	0	0	0	0	0	0	0	0	4	103057168	103076665	+	1730	AGR3
ENSBGRG00000002264	0	0	0	0	0	0	0	0	0	0	0	0	0	0	0	0	0	0	8	51003913	51005346	-	738	-
ENSBGRG00000002265	2003	190.975	2198	176.814	2168	183.056	1159	89.7453	1723	172.206	1859	129.827	2087	187.712	1776	180.238	1368	89.9912	3	72072699	72081331	-	1216	DNAJB4
ENSBGRG00000002266	0	0	0	0	0	0	0	0	0	0	0	0	0	0	0	0	0	0	2	259713	273561	-	2871	ARHGEF19
ENSBGRG00000002267	457	17.2306	578	18.3868	558	18.6315	870	26.6401	421	16.6392	859	23.7228	448	15.9344	519	20.8286	996	25.9097	7	114139517	114603820	+	3075	MSRA
ENSBGRG00000002268	0	0	0	0	0	0	0	0	0	0	0	0	0	0	0	0	0	0	3	57184202	57190011	+	1104	BARHL2
ENSBGRG00000002269	200	6.21158	190	4.97873	105	2.88796	422	10.6443	154	5.0137	406	9.23605	198	5.80111	159	5.25625	651	13.9499	7	11340481	11356229	-	3733	MYORG
ENSBGRG00000002270	210	16.4286	55	3.63026	135	9.35287	166	10.5468	41	3.36226	175	10.0279	116	8.56079	80	6.6616	140	7.55662	1	69547278	69574114	+	1482	POGLUT1
ENSBGRG00000002271	0	0	0	0	0	0	0	0	0	0	0	0	0	0	0	0	0	0	7	98859079	98904498	-	564	-
ENSBGRG00000002272	716	260.227	1602	491.241	767	246.868	250	73.7924	1579	601.571	1946	518.049	1001	343.2	153	59.1886	87	21.8161	2	35406162	35424428	-	319	RPL37A
ENSBGRG00000002273	876	44.0046	341	14.4525	476	21.1753	660	26.9259	424	22.3267	865	31.8272	548	25.9686	648	34.6478	537	18.6117	1	46281050	46377660	+	2308	ST3GAL6
ENSBGRG00000002274	0	0	0	0	0	0	0	0	0	0	0	0	0	0	0	0	0	0	6	112730832	112730987	-	156	-
ENSBGRG00000002275	0	0	9	0.433894	0	0	3	0.13922	0	0	0	0	0	0	0	0	19	0.749065	8	14964418	14967678	+	2029	P2RY11
ENSBGRG00000002277	0	0	0	0	0	0	0	0	0	0	0	0	0	0	0	0	0	0	5	117845055	117850283	-	1500	SLC16A8
ENSBGRG00000002278	22	0.5574	33	0.705425	54	1.21162	63	1.29633	5	0.132794	87	1.61455	83	1.98379	3	0.0809044	91	1.59075	8	6576401	6588265	-	4576	GMIP
ENSBGRG00000002279	0	0	0	0	0	0	0	0	0	0	0	0	0	0	0	0	0	0	7	98877879	98921749	+	814	-
ENSBGRG00000002283	0	0	0	0	0	0	0	0	0	0	0	0	0	0	0	0	0	0	5	8576782	8577912	+	1131	-
ENSBGRG00000002284	41	1.31969	0	0	38	1.08318	43	1.12405	17	0.573589	46	1.08451	63	1.91294	0	0	0	0	8	51055945	51066010	-	3602	CXCL14
ENSBGRG00000002286	184	24.8634	188	21.4335	97	11.6076	127	13.9373	77	10.9068	72	7.12629	185	23.5824	141	20.28	187	17.4342	1	69581265	69600588	+	858	TIMMDC1
ENSBGRG00000002290	0	0	0	0	0	0	0	0	0	0	0	0	0	0	0	0	0	0	5	128904147	128907583	-	996	-
ENSBGRG00000002291	0	0	0	0	0	0	0	0	0	0	0	0	0	0	0	0	0	0	6	114247214	114249172	+	1959	-
ENSBGRG00000002292	0	0	0	0	0	0	0	0	0	0	0	0	0	0	0	0	0	0	5	8624222	8625534	-	399	-
ENSBGRG00000002294	41	11.3993	62	14.5438	72	17.7278	23	5.19342	0	0	13	2.64744	39	10.229	27	7.99033	30	5.75484	6	114253585	114297320	+	417	FAM241A
ENSBGRG00000002295	0	0	0	0	0	0	0	0	0	0	0	0	0	0	0	0	0	0	7	98912880	98913416	+	177	-
ENSBGRG00000002296	0	0	0	0	0	0	0	0	0	0	0	0	0	0	0	0	0	0	2	68511937	68512539	+	498	-
ENSBGRG00000002297	28	1.62885	17	0.834381	0	0	17	0.803163	0	0	7	0.29827	0	0	0	0	32	1.28437	5	117853029	117892791	-	1993	BAIAP2L2
ENSBGRG00000002298	500	37.8639	836	53.4139	432	28.9713	527	32.4114	444	35.2455	840	46.5932	430	30.7183	681	54.892	617	32.2372	4	103060599	103185468	-	1531	TSPAN13
ENSBGRG00000002300	0	0	0	0	0	0	0	0	0	0	0	0	0	0	0	0	0	0	5	8762309	8864955	-	1581	SLC15A5
ENSBGRG00000002301	0	0	0	0	0	0	0	0	0	0	0	0	0	0	0	0	0	0	7	98922684	98923244	-	561	-
ENSBGRG00000002303	258	13.3418	452	19.7209	431	19.7379	138	5.7957	311	16.8585	110	4.16654	125	6.09787	334	18.3843	131	4.67394	3	57928532	57967401	-	2242	ZNF326
ENSBGRG00000002304	0	0	0	0	0	0	0	0	0	0	0	0	0	0	0	0	0	0	3	108841274	108845354	-	734	TSPAN1
ENSBGRG00000002305	0	0	0	0	0	0	0	0	0	0	0	0	0	0	0	0	45	4.88419	2	300589	304127	-	737	CPLANE2
ENSBGRG00000002306	90	11.4791	161	17.3255	63	7.116	72	7.45814	61	8.1557	45	4.20404	113	13.5962	65	8.82443	136	11.968	6	114361194	114391901	+	909	AP1AR
ENSBGRG00000002307	0	0	0	0	0	0	0	0	0	0	0	0	0	0	0	0	0	0	7	98957311	98957898	-	588	-
ENSBGRG00000002308	519	29.2383	597	28.3761	456	22.7499	712	32.5759	311	18.3658	1200	49.517	429	22.799	373	22.3666	747	29.0351	8	14967975	14974044	-	2058	EIF3G
ENSBGRG00000002309	613	48.4793	947	63.1886	1739	121.794	2296	147.469	1208	100.145	1171	67.833	1195	89.1534	857	72.1413	421	22.9718	5	87302720	87308801	+	1466	LUM
ENSBGRG00000002310	240	5.49041	253	4.88323	123	2.49188	336	6.24259	90	2.15825	295	4.94315	211	4.55355	207	5.04047	255	4.02486	3	38956830	38976741	+	5068	CSF1
ENSBGRG00000002311	19	1.3167	14	0.818569	40	2.45484	8	0.450252	20	1.45288	0	0	54	3.53022	0	0	0	0	1	69614777	69633719	-	1673	CD80
ENSBGRG00000002312	2452	105.957	2259	82.3604	1444	55.2594	1621	56.8885	1264	57.2561	1862	58.9356	1248	50.8742	1371	63.06	1271	37.8942	3	72122051	72155311	+	2683	-
ENSBGRG00000002313	140	18.508	139	15.5038	175	20.4879	220	23.6203	161	22.3111	318	30.7926	99	12.3464	121	17.0264	114	10.3981	2	69366729	69411412	-	877	TSN
ENSBGRG00000002314	270	7.2328	442	9.98983	340	8.06586	374	8.13666	227	6.37432	309	6.06303	226	5.71117	308	8.78214	447	8.26167	7	11369326	11434940	-	4328	FAM219A
ENSBGRG00000002316	480	24.7008	880	38.2071	715	32.584	563	23.5293	511	27.5648	433	16.3209	402	19.515	266	14.5699	439	15.5866	7	36343529	36402264	-	2253	CTNNAL1
ENSBGRG00000002318	252	14.6817	111	5.45623	182	9.39026	215	10.173	112	6.84007	193	8.23612	89	4.89149	57	3.53475	192	7.71784	1	69642557	69651492	+	1990	ADPRH
ENSBGRG00000002319	0	0	0	0	0	0	0	0	0	0	0	0	0	0	0	0	0	0	8	51283158	51334513	+	2710	SLC25A48
ENSBGRG00000002320	4890	94.6008	3281	53.5531	4235	72.5552	3597	56.5143	3469	70.3486	3685	52.217	3894	71.065	2974	61.2398	4573	61.0386	6	62779993	63165130	-	5993	LIMCH1
ENSBGRG00000002321	480	8.746	339	5.21148	259	4.17924	438	6.48148	338	6.4558	437	5.83227	628	10.7945	471	9.13474	474	5.95887	2	319279	380876	-	6363	FBXO42
ENSBGRG00000002322	0	0	0	0	0	0	0	0	0	0	0	0	0	0	0	0	0	0	3	108850396	108850911	+	285	P3R3URF
ENSBGRG00000002323	170	5.92415	382	11.2314	249	7.68433	258	7.30178	184	6.72141	276	7.0449	208	6.83777	252	9.34727	292	7.02066	2	35439388	35498999	-	3327	SMARCAL1
ENSBGRG00000002324	0	0	0	0	0	0	0	0	0	0	0	0	0	0	0	0	0	0	1	142870570	142914611	-	2045	CLDN18
ENSBGRG00000002325	39	2.38106	14	0.721151	17	0.919143	2	0.099167	21	1.34397	12	0.53663	0	0	0	0	16	0.673973	3	22057404	22112594	+	1899	TUFT1
ENSBGRG00000002326	2	0.0784433	0	0	0	0	0	0	15	0.616712	22	0.632028	0	0	0	0	0	0	5	128928863	128991975	-	2956	TTLL8
ENSBGRG00000002327	397	18.4259	557	21.8115	445	18.2906	378	14.2482	485	23.5963	347	11.7966	353	15.4556	356	17.5871	288	9.22248	1	94086763	94095719	-	2498	TTC14
ENSBGRG00000002328	85	8.8147	418	36.5727	162	14.8776	474	39.9207	116	12.6099	193	14.66	352	34.4354	44	4.85677	196	14.0237	5	87347424	87355227	+	1118	KERA
ENSBGRG00000002329	0	0	0	0	0	0	0	0	0	0	0	0	0	0	0	0	0	0	3	10579501	10582099	-	744	SPATA46
ENSBGRG00000002330	0	0	0	0	0	0	0	0	0	0	0	0	0	0	0	0	0	0	7	98972613	98973275	-	663	-
ENSBGRG00000002331	255	16.0328	305	16.1794	310	17.2608	216	11.0295	181	11.9292	414	19.0659	264	15.6584	181	12.1131	359	15.5733	8	88724409	89069524	-	1844	SSBP2
ENSBGRG00000002333	99	23.7639	137	27.7458	135	28.6976	149	29.047	62	15.6005	17	2.98896	105	23.7764	0	0	36	5.96215	5	8961235	8976288	+	483	MGST1
ENSBGRG00000002335	22	1.72809	5	0.331365	4	0.278249	13	0.829314	0	0	12	0.69042	39	2.8899	0	0	0	0	1	69662314	69691555	+	1476	PLA1A
ENSBGRG00000002336	0	0	0	0	0	0	0	0	0	0	0	0	0	0	0	0	0	0	7	98987586	98988155	-	570	-
ENSBGRG00000002337	67	2.79724	76	2.67708	5	0.184864	38	1.28846	20	0.875285	1	0.0305804	16	0.630156	28	1.24428	97	2.79411	1	88263362	88321482	+	2777	ETV5
ENSBGRG00000002338	14	1.11098	17	1.13821	69	4.84907	57	3.67356	14	1.16459	34	1.97627	7	0.524025	57	4.81462	51	2.79234	3	108913936	109021105	+	1461	PIK3R3
ENSBGRG00000002339	0	0	0	0	0	0	0	0	0	0	0	0	0	0	0	0	0	0	5	87404158	87448044	+	1910	EPYC
ENSBGRG00000002340	0	0	0	0	0	0	0	0	0	0	0	0	0	0	0	0	0	0	4	103127306	103140726	+	863	AGR2
ENSBGRG00000002342	155	5.01271	178	4.85684	118	3.3795	143	3.75586	125	4.23756	181	4.28754	181	5.52196	171	5.88632	46	1.0264	2	438254	441838	-	3585	-
ENSBGRG00000002343	0	0	0	0	0	0	0	0	0	0	0	0	0	0	0	0	0	0	7	99017612	99018181	-	570	-
ENSBGRG00000002344	0	0	1	0.0754776	0	0	0	0	24	2.25062	0	0	24	2.0254	0	0	0	0	2	69414407	69415702	+	1296	-
ENSBGRG00000002345	0	0	0	0	0	0	0	0	0	0	0	0	0	0	0	0	0	0	5	8992306	8993307	+	1002	-
ENSBGRG00000002346	0	0	0	0	0	0	1	0.118588	0	0	0	0	0	0	0	0	0	0	3	10611213	10640121	-	794	SH2D1B
ENSBGRG00000002348	0	0	22	1.21789	0	0	0	0	0	0	0	0	0	0	0	0	0	0	5	9010351	9012117	+	1767	-
ENSBGRG00000002349	0	0	0	0	0	0	0	0	0	0	0	0	0	0	0	0	0	0	7	99023800	99024369	-	570	-
ENSBGRG00000002351	90	22.7332	167	35.5899	3	0.67107	74	15.1803	55	14.5628	134	24.7919	84	20.0157	14	3.76402	380	66.2245	2	443432	468550	+	459	SZRD1
ENSBGRG00000002353	0	0	17	2.98015	0	0	0	0	0	0	0	0	10	1.96006	47	10.3944	0	0	6	114400495	114401052	-	558	TIFA
ENSBGRG00000002354	1	0.127546	0	0	0	0	1	0.103585	1	0.1337	1	0.0934231	1	0.120321	2	0.271521	0	0	3	22090666	22091655	-	909	-
ENSBGRG00000002355	144	7.28732	207	8.83829	182	8.15653	118	4.84975	95	5.03957	160	5.9308	0	0	83	4.47085	58	2.02512	2	69421720	69433883	+	2291	NIFK
ENSBGRG00000002356	0	0	0	0	0	0	0	0	0	0	0	0	0	0	0	0	0	0	7	99047377	99048289	-	561	-
ENSBGRG00000002357	0	0	0	0	0	0	0	0	0	0	0	0	0	0	0	0	0	0	1	46294672	46295679	-	1008	-
ENSBGRG00000002358	2	0.210607	0	0	0	0	0	0	0	0	0	0	3	0.298015	0	0	0	0	7	114392403	114393503	-	1101	-
ENSBGRG00000002359	49	1.82728	0	0	0	0	41	1.24172	15	0.586362	216	5.89999	25	0.879474	19	0.754171	74	1.90396	5	117893731	117948596	-	3109	PLA2G6
ENSBGRG00000002360	327	30.6484	493	38.9852	185	15.3554	300	22.8357	230	22.5971	478	32.8153	336	29.708	180	17.9573	425	27.4832	1	69712531	69733256	-	1237	POPDC2
ENSBGRG00000002362	0	0	0	0	0	0	0	0	0	0	0	0	0	0	0	0	0	0	7	99060705	99061301	-	597	-
ENSBGRG00000002363	0	0	0	0	0	0	0	0	0	0	0	0	0	0	0	0	0	0	7	114521099	114522520	-	1422	-
ENSBGRG00000002364	0	0	0	0	0	0	5	0.360763	0	0	0	0	0	0	0	0	0	0	5	9152600	9222213	-	1305	LMO3
ENSBGRG00000002365	604	153.233	472	101.03	531	119.299	360	74.1734	401	106.641	679	126.175	448	107.217	622	167.962	170	29.7564	1	159725058	159728323	-	457	S100B
ENSBGRG00000002366	0	0	0	0	0	0	0	0	0	0	0	0	0	0	0	0	0	0	3	22143804	22145057	+	1254	-
ENSBGRG00000002367	0	0	0	0	0	0	0	0	0	0	0	0	0	0	0	0	0	0	7	99069099	99069686	-	588	-
ENSBGRG00000002368	0	0	0	0	0	0	0	0	0	0	0	0	0	0	0	0	0	0	4	129236	156226	+	1449	-
ENSBGRG00000002369	25	15.0962	71	36.1726	38	20.3208	19	9.31782	63	39.8781	50	22.115	14	7.975	0	0	24	9.99903	1	69750054	69752045	-	192	COX17
ENSBGRG00000002370	0	0	0	0	0	0	0	0	0	0	0	0	0	0	0	0	0	0	5	87458019	87459265	+	1167	CCER1
ENSBGRG00000002371	68	1.50283	87	1.62224	78	1.5266	79	1.41795	57	1.32051	8	0.129503	197	4.10716	45	1.05857	16	0.243972	6	114491874	114562488	+	5246	ALPK1
ENSBGRG00000002372	0	0	0	0	0	0	0	0	0	0	0	0	0	0	0	0	0	0	7	114571529	114580188	-	961	-
ENSBGRG00000002374	0	0	0	0	0	0	0	0	0	0	0	0	0	0	0	0	0	0	8	51350358	51353361	-	592	IL9
ENSBGRG00000002376	27	0.696409	0	0	61	1.39335	5	0.104738	8	0.2163	19	0.358957	25	0.608295	0	0	29	0.516079	6	101687109	101753744	+	4495	DAPP1
ENSBGRG00000002377	0	0	0	0	0	0	0	0	0	0	0	0	0	0	0	0	0	0	1	143177542	143178264	-	723	SOX14
ENSBGRG00000002378	126	8.15197	308	16.8126	70	4.01069	104	5.46459	28	1.89896	180	8.53008	30	1.83099	46	3.16779	280	12.4988	5	117994299	117998854	+	1792	MAFF
ENSBGRG00000002380	38	1.27627	54	1.53019	88	2.61741	80	2.18213	100	3.52066	27	0.664219	32	1.01387	45	1.60871	3	0.0695181	1	69772625	69879153	+	3452	CFAP91
ENSBGRG00000002381	0	0	0	0	0	0	0	0	0	0	0	0	10	0.754806	0	0	0	0	3	109008338	109009786	-	1449	-
ENSBGRG00000002382	912	37.8306	1531	53.5817	1226	45.0368	1650	55.5858	1211	52.6572	1960	59.5515	1356	53.0618	1211	53.4687	1547	44.2748	4	103240335	103310308	-	2795	BZW2
ENSBGRG00000002383	972	46.4139	843	33.9627	793	33.5339	563	21.8334	657	32.8861	1022	35.7454	702	31.6222	613	31.1565	872	28.7287	3	10712327	10749051	+	2428	UHMK1
ENSBGRG00000002384	0	0	0	0	0	0	7	0.475551	0	0	0	0	0	0	0	0	26	1.50058	2	474261	518453	-	1386	SPATA21
ENSBGRG00000002387	199	6.61275	239	6.7007	252	7.41581	264	7.12467	194	6.75766	203	4.94098	242	7.58609	179	6.33125	207	4.74588	1	46380795	46469248	-	3489	DCBLD2
ENSBGRG00000002388	285	6.44483	357	6.81127	194	3.88506	422	7.75017	233	5.52316	586	9.70628	265	5.6531	240	5.77677	339	5.28913	8	14986265	15033063	-	5127	DNMT1
ENSBGRG00000002390	689	30.385	689	25.6361	666	26.0102	639	22.8861	654	30.2331	513	16.5709	700	29.1213	604	28.352	559	17.0086	3	22148772	22234078	+	2629	SNX27
ENSBGRG00000002391	0	0	0	0	0	0	0	0	0	0	0	0	0	0	0	0	0	0	7	99089115	99091978	-	630	-
ENSBGRG00000002392	45	2.46679	0	0	63	3.05837	26	1.15751	27	1.55149	0	0	18	0.930821	13	0.758525	26	0.983356	8	51403160	51423104	+	2115	-
ENSBGRG00000002393	18	7.2462	11	3.73614	20	7.13012	0	0	3	1.26597	8	2.35893	9	3.41786	0	0	0	0	2	134994065	134995195	+	288	-
ENSBGRG00000002395	0	0	0	0	0	0	0	0	0	0	0	0	0	0	0	0	0	0	7	114591807	114604655	-	792	PRSS51
ENSBGRG00000002396	188	9.46442	247	10.4912	95	4.23535	226	9.2401	132	6.96587	282	10.3986	318	15.1021	55	2.94717	433	15.0398	5	118003388	118033778	-	2303	TMEM184B
ENSBGRG00000002397	98	3.93695	59	1.99976	69	2.45478	102	3.32787	106	4.4638	54	1.58897	175	6.63202	86	3.67739	38	1.05326	1	159753631	159801552	+	2886	PRMT2
ENSBGRG00000002398	0	0	0	0	0	0	0	0	0	0	0	0	0	0	0	0	0	0	7	99100373	99100933	-	561	-
ENSBGRG00000002399	2202	46.8351	1458	26.164	1334	25.1269	2021	34.9102	1230	27.4236	3048	47.4851	2121	42.5567	886	20.0583	2706	39.7099	3	109028548	109252861	-	5451	MAST2
ENSBGRG00000002401	117	9.78002	90	6.3473	54	3.99739	206	13.9847	26	2.2782	180	11.0208	72	5.67754	32	2.84715	318	18.34	5	80724844	80739828	-	1387	SPRYD3
ENSBGRG00000002403	0	0	0	0	0	0	0	0	0	0	0	0	0	0	0	0	0	0	8	51426008	51439640	-	717	LECT2
ENSBGRG00000002404	2501	57.9928	2362	46.2097	2589	53.1645	2383	44.8762	2212	53.7663	1963	33.3402	2055	44.9517	1882	46.4501	2151	34.4126	2	69525145	69789162	+	5000	CLASP1
ENSBGRG00000002405	292	7.78975	284	6.39222	245	5.78809	200	4.33314	92	2.57273	113	2.20804	188	4.73121	225	6.38896	168	3.0922	8	19487636	19545476	-	4346	-
ENSBGRG00000002406	0	0	0	0	0	0	0	0	0	0	0	0	0	0	0	0	0	0	4	166876	213950	+	3360	-
ENSBGRG00000002407	0	0	0	0	0	0	0	0	0	0	0	0	0	0	0	0	0	0	7	99111825	99112412	-	588	-
ENSBGRG00000002408	506	43.8127	138	10.0814	403	30.9018	443	31.1519	348	31.586	744	47.1857	258	21.0738	105	9.67711	264	15.7714	2	135077998	135114265	-	1339	FRZB
ENSBGRG00000002409	0	0	0	0	0	0	0	0	0	0	0	0	0	0	0	0	0	0	1	88388169	88403466	-	852	-
ENSBGRG00000002412	332	12.0815	349	10.7153	339	10.9248	242	7.15207	159	6.06522	251	6.69031	394	13.5255	537	20.8001	155	3.89165	1	144046569	144125538	-	3186	NCK1
ENSBGRG00000002413	0	0	0	0	0	0	0	0	0	0	0	0	0	0	0	0	0	0	7	99122140	99122709	-	570	-
ENSBGRG00000002414	5545	148.609	4075	92.1434	5303	125.862	4628	100.732	5287	148.531	3153	61.895	3466	87.6286	3869	110.37	3232	59.763	5	88893190	88968433	+	4326	ATP2B1
ENSBGRG00000002415	0	0	0	0	0	0	0	0	0	0	0	0	0	0	0	0	0	0	5	9886810	9887121	+	312	-
ENSBGRG00000002416	51	5.58347	61	5.63452	18	1.74516	207	18.405	18	2.06572	123	9.86342	57	5.88685	0	0	199	15.0316	8	15053382	15054440	-	1059	S1PR2
ENSBGRG00000002417	0	0	0	0	0	0	0	0	0	0	0	0	0	0	0	0	0	0	7	114618388	114635497	+	1007	PRSS55
ENSBGRG00000002419	973	58.8772	1230	62.7961	637	34.1353	1648	80.9886	937	59.4346	2223	98.5286	1219	69.5844	1452	93.5208	1930	80.5767	5	47799869	47823964	+	1916	COQ10A
ENSBGRG00000002421	140	8.7266	147	7.73085	128	7.06572	85	4.30297	103	6.73007	110	5.02225	159	9.34949	94	6.23666	101	4.34366	7	99157933	99160494	-	1860	KLHL9
ENSBGRG00000002422	2	0.164569	0	0	0	0	0	0	0	0	0	0	0	0	0	0	0	0	5	128999747	129026430	-	1409	MLC1
ENSBGRG00000002423	5	0.247522	0	0	0	0	0	0	0	0	0	0	0	0	0	0	0	0	7	11435673	11513723	+	2342	DNAI1
ENSBGRG00000002424	0	0	0	0	0	0	0	0	0	0	0	0	0	0	0	0	0	0	5	10526566	10527638	-	1073	-
ENSBGRG00000002425	232	22.0294	134	10.7353	144	12.1089	396	30.5381	142	14.1341	450	31.2979	160	14.332	215	21.73	617	40.4219	2	528567	542197	+	1221	NECAP2
ENSBGRG00000002428	2159	177.653	3778	262.285	2866	208.845	3199	213.779	3309	285.418	3652	220.109	2807	217.889	1890	165.534	5638	320.082	5	77391750	77400262	+	1409	TMBIM6
ENSBGRG00000002429	681	23.4287	745	21.6247	776	23.6424	607	16.9598	544	19.6184	622	15.674	510	16.5518	534	19.5546	521	12.3667	3	39025403	39073296	+	3370	AHCYL1
ENSBGRG00000002430	368	22.3732	362	18.5687	326	17.552	259	12.7883	328	20.9035	210	9.35162	208	11.9293	324	20.9668	328	13.7585	4	103307343	103357422	+	1907	ANKMY2
ENSBGRG00000002431	25	1.29802	0	0	17	0.781663	41	1.72885	0	0	18	0.684545	4	0.195918	0	0	0	0	5	10590066	10603654	-	2233	RERGL
ENSBGRG00000002432	0	0	0	0	0	0	0	0	0	0	0	0	0	0	0	0	0	0	1	69972069	69984458	+	2126	NR1I2
ENSBGRG00000002433	0	0	23	0.627045	0	0	0	0	16	0.541955	0	0	0	0	0	0	0	0	7	114700373	114704723	-	3588	-
ENSBGRG00000002434	0	0	0	0	0	0	0	0	0	0	0	0	0	0	0	0	0	0	7	99208638	99209207	+	570	-
ENSBGRG00000002435	206	5.58939	144	3.2965	117	2.81133	305	6.72092	124	3.52683	361	7.17452	200	5.11919	114	3.29237	329	6.15901	5	118086484	118127849	-	4273	CSNK1E
ENSBGRG00000002436	0	0	0	0	4	0.326726	0	0	0	0	0	0	0	0	0	0	0	0	1	88393226	88394482	+	1257	-
ENSBGRG00000002437	2778	78.3266	3242	77.1228	3583	89.465	1836	42.0418	2858	84.4704	2477	51.1554	2017	53.6484	2834	85.0519	1336	25.9897	2	135176318	135285535	-	4112	NCKAP1
ENSBGRG00000002438	359	14.8016	501	17.4279	661	24.1349	1207	40.4161	512	22.1284	663	20.0224	778	30.2599	316	13.8678	1141	32.4577	8	51516544	51557144	+	2812	TGFBI
ENSBGRG00000002439	0	0	0	0	0	0	0	0	0	0	0	0	0	0	0	0	0	0	7	99215592	99216179	+	588	-
ENSBGRG00000002440	52	6.61782	95	10.2007	118	13.2991	533	55.0898	102	13.6075	729	67.956	188	22.5706	45	6.09581	1905	167.272	5	80746972	80750782	+	911	IGFBP6
ENSBGRG00000002441	0	0	0	0	0	0	0	0	0	0	0	0	0	0	0	0	0	0	7	36375649	36376767	+	1119	-
ENSBGRG00000002442	0	0	0	0	0	0	0	0	0	0	0	0	0	0	0	0	0	0	7	99226045	99226626	+	582	-
ENSBGRG00000002443	977	88.7716	1117	85.6299	816	65.6597	637	47.0057	603	57.4331	605	40.2646	606	51.9428	862	83.3669	497	31.1568	1	88424108	88445919	+	1276	TRA2B
ENSBGRG00000002445	0	0	0	0	0	0	0	0	0	0	0	0	0	0	0	0	11	0.400507	7	114744586	114791532	+	2197	C8orf74
ENSBGRG00000002446	568	159.838	569	135.095	789	196.625	445	101.701	612	180.53	286	58.9505	424	112.557	627	187.805	271	52.6162	6	101759345	101770322	-	412	LAMTOR3
ENSBGRG00000002447	0	0	0	0	0	0	0	0	0	0	0	0	0	0	0	0	0	0	7	99243763	99244496	-	546	-
ENSBGRG00000002448	0	0	0	0	0	0	0	0	0	0	0	0	0	0	0	0	0	0	2	35556473	35686849	+	2689	MARCHF4
ENSBGRG00000002450	0	0	0	0	2	0.11058	0	0	2	0.130892	0	0	0	0	1	0.0664546	15	0.646141	2	144271152	144274268	-	1857	-
ENSBGRG00000002451	10	0.473028	0	0	0	0	32	1.22933	13	0.644608	0	0	0	0	0	0	0	0	1	94750471	95071839	+	2451	-
ENSBGRG00000002452	1168	40.1473	1294	37.5268	1542	46.9383	799	22.3045	1099	39.5983	758	19.0841	1049	34.0144	664	24.2934	465	11.0277	3	72157370	72224176	-	3373	NEXN
ENSBGRG00000002453	1423	62.5641	1364	50.5973	1538	59.8833	1165	41.5985	1164	53.6461	1334	42.96	1418	58.8125	829	38.7955	995	30.1829	7	36408838	36493646	-	2637	TMEM245
ENSBGRG00000002454	11	0.40564	25	0.777823	22	0.718455	27	0.808618	35	1.35295	37	0.999396	58	2.01767	21	0.824278	50	1.27214	3	58039394	58042972	-	3144	LRRC8D
ENSBGRG00000002455	0	0	0	0	0	0	0	0	0	0	0	0	0	0	0	0	0	0	1	159847034	159870739	-	3166	-
ENSBGRG00000002456	0	0	0	0	0	0	0	0	0	0	0	0	0	0	0	0	0	0	7	99305289	99305858	+	570	-
ENSBGRG00000002457	463	48.7998	577	51.3105	334	31.1755	504	43.142	273	30.1624	596	46.0121	548	54.4868	248	27.8225	405	29.4517	7	74761552	74786437	-	1100	FXN
ENSBGRG00000002458	184	8.54337	152	5.95454	141	5.79775	291	10.9733	86	4.18577	415	14.1139	257	11.2569	166	8.20402	255	8.16901	8	15075948	15087943	+	2497	MRPL4
ENSBGRG00000002459	42	0.818119	10	0.164346	7	0.120752	7	0.110738	21	0.428797	76	1.08435	36	0.661521	18	0.373204	101	1.35739	2	557326	608335	+	5952	CROCC
ENSBGRG00000002460	0	0	0	0	0	0	0	0	0	0	0	0	0	0	0	0	0	0	4	246978	256881	-	1857	-
ENSBGRG00000002462	0	0	0	0	0	0	0	0	0	0	0	0	0	0	0	0	0	0	7	99312224	99312811	+	588	-
ENSBGRG00000002464	76	2.23469	88	2.18313	89	2.31751	166	3.96409	39	1.20208	212	4.56591	55	1.5256	48	1.50228	350	7.1005	5	77424858	77436199	-	3943	NCKAP5L
ENSBGRG00000002465	217	6.57918	73	1.86736	75	2.01374	167	4.11207	110	3.49599	269	5.97383	94	2.68852	47	1.51676	279	5.83625	8	6595101	6613265	-	3824	ATP13A1
ENSBGRG00000002466	664	53.7595	845	57.7214	978	70.1221	867	57.0083	687	58.3054	708	41.9864	590	45.0622	787	67.8217	479	26.7572	1	69993406	70226000	-	1432	GSK3B
ENSBGRG00000002467	0	0	0	0	0	0	0	0	0	0	0	0	0	0	0	0	19	0.964985	5	80752035	80761889	+	1575	SOAT2
ENSBGRG00000002468	0	0	0	0	0	0	0	0	0	0	0	0	0	0	0	0	0	0	5	129070067	129108508	+	2093	-
ENSBGRG00000002469	80	7.44991	131	10.2926	135	11.1333	71	5.36971	40	3.90468	68	4.63829	59	5.18306	7	0.69385	160	10.2801	2	69810115	69811425	+	1245	-
ENSBGRG00000002470	107	6.73845	130	6.90737	133	7.41749	29	1.48322	62	4.09292	37	1.70674	108	6.41614	11	0.737354	57	2.47667	6	101781052	101822075	-	1841	DNAJB14
ENSBGRG00000002471	0	0	0	0	39	1.31374	0	0	0	0	0	0	27	0.968841	0	0	0	0	2	144372495	144397071	-	3048	CYP27C1
ENSBGRG00000002472	0	0	0	0	0	0	0	0	0	0	0	0	0	0	0	0	0	0	7	99338534	99339121	+	588	-
ENSBGRG00000002473	100	2.43621	131	2.69264	77	1.66125	134	2.65125	77	1.96639	178	3.17631	150	3.4473	109	2.82649	197	3.3113	3	58314549	58416010	-	4759	LRRC8C
ENSBGRG00000002474	6	0.562811	0	0	0	0	0	0	0	0	33	2.26733	15	1.32732	0	0	0	0	1	144196771	144198006	-	1236	SLC35G2
ENSBGRG00000002475	1	0.0911471	10	0.769017	0	0	0	0	0	0	0	0	0	0	29	2.81351	0	0	1	144344258	144345529	-	1272	-
ENSBGRG00000002476	0	0	0	0	0	0	0	0	0	0	0	0	0	0	0	0	0	0	7	99347675	99348262	+	588	-
ENSBGRG00000002477	14	0.694544	21	0.878989	0	0	18	0.72523	10	0.52004	0	0	18	0.842399	39	2.05941	33	1.12954	5	129082394	129084817	+	2337	-
ENSBGRG00000002479	0	0	0	0	0	0	0	0	0	0	0	0	0	0	0	0	0	0	5	10774480	11277216	+	4715	PIK3C2G
ENSBGRG00000002480	0	0	2	0.0982611	0	0	25	1.18231	3	0.183124	66	2.81508	15	0.823994	22	1.3636	59	2.37044	7	114823729	114830502	-	1991	SOX7
ENSBGRG00000002481	0	0	0	0	0	0	0	0	0	0	0	0	0	0	0	0	0	0	1	144469517	144470061	-	390	-
ENSBGRG00000002483	84	4.20868	115	4.86136	96	4.25958	119	4.84223	53	2.78361	43	1.57806	126	5.9554	188	10.0261	271	9.36815	1	160015927	160041690	+	2314	FBXO25
ENSBGRG00000002484	647	46.1332	693	41.6904	982	62.0084	580	33.5869	478	35.7275	677	35.3579	541	36.3899	331	25.1214	882	43.3906	3	10788718	10819880	+	1626	UAP1
[truncated: 18,954 more rows]

## Sheet: Identified LncRNAs
transcript_id	fpkm:LP1	fpkm:LP2	fpkm:LP3	fpkm:MP1	fpkm:MP2	fpkm:MP3	fpkm:HP1	fpkm:HP2	fpkm:HP3	read_count:HP1	read_count:HP2	read_count:HP3	read_count:LP1	read_count:LP2	read_count:LP3	read_count:MP1	read_count:MP2	read_count:MP3	Chromosome	Start Site	End Site	Direction	Length	Gene ID	Name
MSTRG.100.1	0	0	1.05464	0	0	0	1.59725	0	0	53	0	0	0	0	37	0	0	0	1	6729610	6751896	+	350	MSTRG.100	MSTRG.100
MSTRG.1000.1	0	0	0	2.06545	0	0	0	0	0	0	0	0	0	0	0	70	0	0	1	17960762	17963609	-	339	MSTRG.1000	MSTRG.1000
MSTRG.100023.1	0	0.955916	0	1.56417	0	0	0.465801	0	0	11	0	0	0	22	0	37	0	0	19	35287936	35289353	-	231	MSTRG.100023	MSTRG.100023
MSTRG.100024.1	0	0.90569	0	0	2.68885	0	0	0	0	0	0	0	0	26	0	0	69	0	19	35288297	35289775	-	293	MSTRG.100024	MSTRG.100024
MSTRG.100026.1	0.484685	0	1.82249	0.718349	0	0.845306	0	1.23521	0	0	50	0	20	0	79	32	0	39	19	35318493	35319944	-	436	MSTRG.100026	MSTRG.100026
MSTRG.100027.1	1.49918	0	0	0	0	0	0	1.77773	0	0	56	0	48	0	0	0	0	0	19	35348845	35349673	-	339	MSTRG.100027	MSTRG.100027
MSTRG.100029.1	0	3.18219	0	0	0	0	0	0	0	0	0	0	0	72	0	0	0	0	19	35364031	35365327	-	233	MSTRG.100029	MSTRG.100029
MSTRG.10003.1	0	0	0	2.26464	0	0	0	0	0	0	0	0	0	0	0	97	0	0	1	118495848	118496356	-	427	MSTRG.10003	MSTRG.10003
MSTRG.100030.1	0	0.322831	0	0	0.144139	1.94161	0	0	0.535557	0	0	35	0	18	0	0	8	118	19	35380372	35380992	-	573	MSTRG.100030	MSTRG.100030
MSTRG.10004.1	0.921055	0	1.50244	1.12089	0	0	0	0	0	0	0	0	71	0	121	92	0	0	1	118497116	118498661	-	817	MSTRG.10004	MSTRG.10004
MSTRG.100060.1	1.31392	1.86043	0	0.195039	1.99761	0	0	0	0	0	0	0	100	145	0	16	141	0	19	36203355	36205374	-	806	MSTRG.100060	MSTRG.100060
MSTRG.100065.1	0	0	0	0	0	3.26421	1.88182	0	0	50	0	0	0	0	0	0	0	97	19	36222961	36224219	-	281	MSTRG.100065	MSTRG.100065
MSTRG.100065.2	0	0	0	0.097434	0	0	0	0	3.52999	0	0	90	0	0	0	3	0	0	19	36223647	36224856	-	225	MSTRG.100065	MSTRG.100065
MSTRG.100085.1	0	0	0	0.483636	2.06126	0	0	0	0.653607	0	0	31	0	0	0	20	74	0	19	36302520	36303624	-	411	MSTRG.100085	MSTRG.100085
MSTRG.1001.1	0	0	0	0	0	0	0	2.18273	0	0	58	0	0	0	0	0	0	0	1	17966005	17967228	-	290	MSTRG.1001	MSTRG.1001
MSTRG.100101.1	0	0	1.51888	0	0	2.0545	0	0	0	0	0	0	0	0	72	0	0	104	19	36342758	36343258	-	478	MSTRG.100101	MSTRG.100101
MSTRG.100109.1	0	0	0	0	0	0	0	3.92891	0	0	88	0	0	0	0	0	0	0	19	36399082	36400493	-	244	MSTRG.100109	MSTRG.100109
MSTRG.100117.1	0	1.68451	0	0	0	0	0	0	0	0	0	0	0	48	0	0	0	0	19	36414011	36414798	-	294	MSTRG.100117	MSTRG.100117
MSTRG.100123.1	0	0.793351	0	0	0	2.53643	0	0	0.100744	0	0	4	0	23	0	0	0	81	19	36425066	36426670	-	299	MSTRG.100123	MSTRG.100123
MSTRG.100127.1	2.42333	0	0	0	0	0	0	0	0	0	0	0	47	0	0	0	0	0	19	36432566	36434976	-	204	MSTRG.100127	MSTRG.100127
MSTRG.100128.1	0	0	0	0	0.501147	0	0	2.47376	0	0	54	0	0	0	0	0	11	0	19	36432967	36435410	-	235	MSTRG.100128	MSTRG.100128
MSTRG.100129.1	1.09559	0	0.284626	0	0	0	3.85569	0	0	122	0	0	35	0	10	0	0	0	19	36433323	36435863	-	334	MSTRG.100129	MSTRG.100129
MSTRG.10014.1	1.40682	1.3091	0	0	1.40575	0	0	7.87312	0	0	227	0	42	40	0	0	39	0	1	118516186	118517324	-	314	MSTRG.10014	MSTRG.10014
MSTRG.10016.1	0	0	0	0	0	1.11907	0	0	0	0	0	0	0	0	0	0	0	45	1	118534319	118535582	+	375	MSTRG.10016	MSTRG.10016
MSTRG.100166.1	1.66029	1.22432	0.929939	3.85831	1.40346	1.62861	2.72463	0.447732	4.10935	411	66	746	251	189	147	616	196	276	19	36853368	36856136	-	1600	MSTRG.100166	MSTRG.100166
MSTRG.100166.2	0	0	0	0.149188	0	0.614658	0	0	1.13875	0	0	207	0	0	0	24	0	104	19	36853371	36856136	-	1597	MSTRG.100166	MSTRG.100166
MSTRG.100168.1	1.95967	0.252449	1.72239	0	0	0	0	0	1.61484	0	0	50	50	7	46	0	0	0	19	36860409	36861650	-	268	MSTRG.100168	MSTRG.100168
MSTRG.100169.1	0.403266	2.51008	2.5205	2.1783	2.6323	1.61741	0	0.526653	0	0	22	0	18	110	113	99	104	78	19	36871927	36873301	-	453	MSTRG.100169	MSTRG.100169
MSTRG.100169.2	0.480463	2.66983	0.220172	0.101386	0.410632	0	1.03249	0.527756	0	33	17	0	16	88	8	4	13	0	19	36872041	36873301	-	339	MSTRG.100169	MSTRG.100169
MSTRG.10017.1	0.512256	0.013848	2.94944	0.623168	1.27891	0	0	0	0	0	0	0	24	1	143	31	55	0	1	118556370	118556917	-	492	MSTRG.10017	MSTRG.10017
MSTRG.100170.1	1.53545	0	0.482473	0	0	0.635365	0	0	0	0	0	0	44	0	15	0	0	21	19	36876942	36878421	-	304	MSTRG.100170	MSTRG.100170
MSTRG.100171.1	0.080281	1.38798	1.61233	0.310375	1.48288	0.731257	0.051865	0	0	2	0	0	4	55	65	13	53	32	19	36877758	36879340	-	407	MSTRG.100171	MSTRG.100171
MSTRG.100172.1	0	1.34442	0	0	0	0	0.107909	0	1.61155	3	0	43	0	31	0	0	0	0	19	36884589	36885488	-	234	MSTRG.100172	MSTRG.100172
MSTRG.100174.1	0.893211	0	2.02233	0.070929	0	0	0.363818	0	0	11	0	0	25	0	59	3	0	0	19	36890245	36891767	-	294	MSTRG.100174	MSTRG.100174
MSTRG.100176.1	3.64085	0	1.35807	0	0.496046	0.840317	0.367104	0	0	11	0	0	102	0	40	0	13	27	19	36902292	36902651	-	296	MSTRG.100176	MSTRG.100176
MSTRG.100177.1	2.86365	4.14461	3.62203	0.512094	0.37842	0	1.59717	1.59929	0	175	171	0	314	465	414	60	39	0	19	36908727	36910763	-	1162	MSTRG.100177	MSTRG.100177
MSTRG.100177.2	0.285026	1.73288	1.31732	1.07292	1.53821	0.209352	0.666829	0.157573	1.52242	100	23	275	43	267	207	171	214	36	19	36910395	36912862	-	1593	MSTRG.100177	MSTRG.100177
MSTRG.100178.1	0	1.36853	0	0.149463	0	0	1.97114	0	0	48	0	0	0	34	0	4	0	0	19	36910077	36911205	-	254	MSTRG.100178	MSTRG.100178
MSTRG.100179.2	0	0.003994	0.104183	0	0.554313	0.058995	0.083444	0	0	8	0	0	0	1	10	0	45	6	19	36919956	36921713	-	923	MSTRG.100179	MSTRG.100179
MSTRG.100179.3	0.206503	1.18758	0.263457	0.2034	1.25402	0.253239	1.17578	0	0.905595	103	0	95	18	106	24	19	101	25	19	36919956	36921713	-	923	MSTRG.100179	MSTRG.100179
MSTRG.100179.4	2.3712	2.01241	1.77959	2.3142	1.97597	2.10475	2.64861	1.70379	0.867216	507	318	200	455	395	356	470	351	452	19	36920858	36923724	-	2032	MSTRG.100179	MSTRG.100179
MSTRG.10018.1	0.213277	0	0	0	0	0	3.15968	0	0	77	0	0	6	0	0	0	0	0	1	118560035	118561081	-	256	MSTRG.10018	MSTRG.10018
MSTRG.100180.1	0.305693	3.21159	1.45955	0.027176	0.169195	0	0	0	1.4704	0	0	91	16	169	79	2	9	0	19	36926394	36926971	-	546	MSTRG.100180	MSTRG.100180
MSTRG.100181.1	2.55492	2.42192	1.3024	0	2.86277	0.959487	0.819805	0.754739	1.66796	101	91	248	316	306	168	0	327	133	19	36932786	36935143	-	1309	MSTRG.100181	MSTRG.100181
MSTRG.100181.2	0.275621	0	0.461674	2.06666	0	0.235703	0	0	0.045646	0	0	5	22	0	39	175	0	22	19	36932787	36934683	-	845	MSTRG.100181	MSTRG.100181
MSTRG.100181.3	0.012416	0	0	0	0.847171	0	0.355526	0	0.078492	10	0	3	1	0	0	0	22	0	19	36933800	36935143	-	295	MSTRG.100181	MSTRG.100181
MSTRG.100182.1	2.03572	0.819931	0	0.306502	0.483249	0.80305	0.833092	0.275733	1.27573	46	15	84	111	46	0	18	25	49	19	36938572	36940115	-	577	MSTRG.100182	MSTRG.100182
MSTRG.100185.4	0	0.826528	0	1.45957	0	0	0	0	0	0	0	0	0	28	0	51	0	0	19	36967750	36969234	+	345	MSTRG.100185	MSTRG.100185
MSTRG.100186.1	0	0	0	0.577007	0	0	2.69177	0	0	76	0	0	0	0	0	18	0	0	19	36967539	36968983	+	297	MSTRG.100186	MSTRG.100186
MSTRG.10019.1	0	3.91767	0.228773	0.123959	0	0	0.011185	1.65793	0.12209	1	61	6	0	151	9	5	0	0	1	118560231	118561420	-	399	MSTRG.10019	MSTRG.10019
MSTRG.10021.1	1.72443	2.79422	3.17717	3.0126	3.66181	3.36676	3.4105	5.37643	3.18788	490	751	551	248	411	476	458	487	542	1	118572512	118575070	-	1524	MSTRG.10021	MSTRG.10021
MSTRG.100217.1	0	0	0	0	0	0	0	0	1.58754	0	0	56	0	0	0	0	0	0	19	37603111	37604550	-	307	MSTRG.100217	MSTRG.100217
MSTRG.10023.1	0.515433	0	1.26173	4.71946	0.066731	1.66904	3.18976	4.19057	0.015504	173	221	2	28	0	71	270	4	101	1	118586288	118587572	-	573	MSTRG.10023	MSTRG.10023
MSTRG.100238.1	0	0	0	0	0	5.01705	0	0	0	0	0	0	0	0	0	0	0	169	19	38054324	38055710	+	318	MSTRG.100238	MSTRG.100238
MSTRG.10024.1	0	0.436747	0	1.89272	1.34777	0.986956	0.773641	2.00153	1.79001	35	86	95	0	20	0	89	55	49	1	118586628	118587807	-	468	MSTRG.10024	MSTRG.10024
MSTRG.10024.2	0	0	0	0.677793	0	0	0	3.19447	0	0	121	0	0	0	0	28	0	0	1	118586683	118587807	-	413	MSTRG.10024	MSTRG.10024
MSTRG.100241.1	0	0	0	0	0	2.65821	0.738842	0	0	21	0	0	0	0	0	0	0	85	19	38064235	38065768	-	302	MSTRG.100241	MSTRG.100241
MSTRG.100241.2	0	0	0	0	0	1.89524	0.596127	0	0	15	0	0	0	0	0	0	0	53	19	38064277	38065768	-	260	MSTRG.100241	MSTRG.100241
MSTRG.100243.1	0.225124	0	0	0.359989	0.39718	0	1.30865	1.50538	0.651119	94	105	57	17	0	0	28	27	0	19	38069244	38070661	-	759	MSTRG.100243	MSTRG.100243
MSTRG.100245.1	0	0	0	0	0.615815	0	0	0	1.88443	0	0	57	0	0	0	0	15	0	19	38072363	38073599	-	266	MSTRG.100245	MSTRG.100245
MSTRG.100251.1	2.61705	0	0.686725	0	1.1662	0	0.583679	0	0	15	0	0	67	0	19	0	28	0	19	38086689	38088005	+	271	MSTRG.100251	MSTRG.100251
MSTRG.100258.1	0	1.99061	0	0.032631	0	0	0	0	0	0	0	0	0	90	0	2	0	0	19	38104695	38118197	+	467	MSTRG.100258	MSTRG.100258
MSTRG.100259.1	0	0	0	0.810029	0	0	0	2.82734	0	0	87	0	0	0	0	28	0	0	19	38110264	38111833	+	335	MSTRG.100259	MSTRG.100259
MSTRG.10026.1	0	0	0	0	0	0	3.49505	0	0	101	0	0	0	0	0	0	0	0	1	118622498	118624035	-	306	MSTRG.10026	MSTRG.10026
MSTRG.10027.1	0	0	0	0	0	2.25495	0	0	0	0	0	0	0	0	0	0	0	56	1	118623078	118624543	-	234	MSTRG.10027	MSTRG.10027
MSTRG.100270.1	0.62237	0	2.63138	0.32828	0	0	0	0	0.946028	0	0	47	26	0	112	15	0	0	19	38152007	38153090	-	430	MSTRG.100270	MSTRG.100270
MSTRG.100270.2	0	0	0	0	0	1.43164	0	0	0	0	0	0	0	0	0	0	0	37	19	38152871	38153327	-	242	MSTRG.100270	MSTRG.100270
MSTRG.100273.1	0.722515	0	0	0.00943	0	6.85801	0.099469	0.542763	0	6	29	0	39	0	0	1	0	412	19	38158155	38189733	-	569	MSTRG.100273	MSTRG.100273
MSTRG.100274.1	0.200319	0	0.744711	0.358808	0	1.97991	1.20042	0.606439	0.217942	66	33	15	11	0	43	21	0	121	19	38176491	38178265	-	579	MSTRG.100274	MSTRG.100274
MSTRG.100278.12	0.243541	0	1.79576	1.24646	0.71049	0	1.44277	0	1.02929	102	0	87	18	0	132	93	47	0	19	38783979	38785480	+	744	MSTRG.100278	MSTRG.100278
MSTRG.100278.13	4.80058	3.42212	2.96567	8.56701	7.87683	2.9021	9.62408	4.66167	1.4406	712	336	129	356	260	229	672	540	241	19	38785225	38787143	+	786	MSTRG.100278	MSTRG.100278
MSTRG.100279.1	0.947383	0	0	3.10096	0	0	0.319291	0	0	9	0	0	24	0	0	83	0	0	19	38564458	38566947	+	268	MSTRG.100279	MSTRG.100279
MSTRG.100280.1	1.82131	2.36063	0.876923	1.62115	1.13512	2.752	0.633057	2.10598	0.932227	22	72	39	64	84	32	60	37	107	19	38591761	38593010	+	368	MSTRG.100280	MSTRG.100280
MSTRG.100280.2	2.16748	0.720434	0.485207	0.307324	1.37521	1.31478	0.314762	1.39113	0.598282	11	47	25	76	26	18	12	45	52	19	38591761	38593010	+	368	MSTRG.100280	MSTRG.100280
MSTRG.100281.1	0	0	0	0	0	0	0	2.78693	0.103685	0	89	5	0	0	0	0	0	0	19	38610411	38611985	+	345	MSTRG.100281	MSTRG.100281
MSTRG.100282.1	0	0	1.9013	0	0	0	0	0	0	0	0	0	0	0	44	0	0	0	19	38617735	38619161	+	235	MSTRG.100282	MSTRG.100282
MSTRG.100284.1	0	0	0	0	0	0	0	2.91031	0	0	78	0	0	0	0	0	0	0	19	38646828	38647593	+	290	MSTRG.100284	MSTRG.100284
MSTRG.100285.1	0	0	2.17291	0	0	0	0	0	0.678325	0	0	19	0	0	51	0	0	0	19	38668744	38670017	+	236	MSTRG.100285	MSTRG.100285
MSTRG.100286.1	0	0	0.890031	1.70423	1.69941	0	0.243177	1.97198	0	6	48	0	0	0	23	45	39	0	19	38677471	38678536	+	261	MSTRG.100286	MSTRG.100286
MSTRG.100287.1	0.795847	0	0.887603	0	0	0	0.973647	0	0.905739	54	0	60	44	0	51	0	0	0	19	38698676	38700537	+	583	MSTRG.100287	MSTRG.100287
MSTRG.100287.2	0.184077	0	0.130725	0	0	0	1.167	0	0.829577	37	0	32	6	0	5	0	0	0	19	38698929	38700537	+	330	MSTRG.100287	MSTRG.100287
MSTRG.100288.1	2.99086	1.82356	4.00528	1.97069	5.17925	3.38032	4.91718	3.53927	0	365	256	0	223	139	310	155	356	282	19	38785729	38787663	+	788	MSTRG.100288	MSTRG.100288
MSTRG.100293.11	0	0	0	0	0	1.56201	0	0	0	0	0	0	0	0	0	0	0	61	19	38902153	38903715	+	366	MSTRG.100293	MSTRG.100293
MSTRG.100294.1	2.66551	1.07419	1.13872	0.520236	2.16985	0	1.91002	0	0	55	0	0	77	32	35	16	58	0	19	38884882	38886194	+	305	MSTRG.100294	MSTRG.100294
MSTRG.100295.1	0.490625	0.794362	0	1.578	0.279664	0	3.20389	0	0	115	0	0	18	30	0	60	10	0	19	38889110	38890625	+	379	MSTRG.100295	MSTRG.100295
MSTRG.1003.1	0	0	1.62969	0	0	0	0	0	0	0	0	0	0	0	43	0	0	0	1	17969410	17971007	-	268	MSTRG.1003	MSTRG.1003
MSTRG.100306.1	0.029871	0	0	1.7761	0	0.177718	0.105594	0	0.95266	4	0	35	1	0	0	58	0	7	19	39011903	39013911	+	322	MSTRG.100306	MSTRG.100306
MSTRG.100307.1	0	0.395912	0	0	0	1.26325	0	0	0	0	0	0	0	10	0	0	0	35	19	39017029	39018289	+	260	MSTRG.100307	MSTRG.100307
MSTRG.100308.1	0.424972	0	0	0.363595	1.17464	0	1.28953	6.4971	0	28	134	0	10	0	0	9	24	0	19	39017673	39018897	+	225	MSTRG.100308	MSTRG.100308
MSTRG.100310.1	0	1.90809	0	0	0	0	0	0	0	0	0	0	0	46	0	0	0	0	19	39049860	39050130	+	249	MSTRG.100310	MSTRG.100310
MSTRG.100311.1	0	2.36782	0	0	0	0	0	0	0	0	0	0	0	73	0	0	0	0	19	39072659	39074141	+	316	MSTRG.100311	MSTRG.100311
MSTRG.100312.1	0	0	0	0	1.48933	0	0	1.24779	0	0	46	0	0	0	0	0	52	0	19	39080468	39082006	+	400	MSTRG.100312	MSTRG.100312
MSTRG.100313.1	0.251328	0	0.199922	0	0	0	0	1.36272	0	0	30	0	6	0	5	0	0	0	19	39082915	39084351	+	233	MSTRG.100313	MSTRG.100313
MSTRG.100314.1	0	0	0	0	0	0	0.301925	2.61689	0	7	59	0	0	0	0	0	0	0	19	39092471	39094159	+	244	MSTRG.100314	MSTRG.100314
MSTRG.100315.1	0	0	0	0	0	0	0	0	1.8529	0	0	73	0	0	0	0	0	0	19	39099308	39100474	+	344	MSTRG.100315	MSTRG.100315
MSTRG.100316.1	0	0.268965	1.35807	0	0	0	0	0	0	0	0	0	0	7	34	0	0	0	19	39112249	39114634	+	250	MSTRG.100316	MSTRG.100316
MSTRG.100317.1	0.96578	0	0	0	0	1.01598	0	2.39176	0	0	127	0	53	0	0	0	0	62	19	39112642	39115363	+	575	MSTRG.100317	MSTRG.100317
MSTRG.100318.1	0.239962	0	1.14366	0.13682	0.185336	0	0	5.16665	0.022149	0	202	2	10	0	48	6	7	0	19	39146232	39147872	+	425	MSTRG.100318	MSTRG.100318
MSTRG.100320.1	0.06289	0	0	0	0	0	0	0	1.38735	0	0	50	2	0	0	0	0	0	19	39159551	39161060	+	316	MSTRG.100320	MSTRG.100320
MSTRG.100320.2	0	0	2.67378	0	0	0	0	0	0.173525	0	0	9	0	0	118	0	0	0	19	39159631	39161270	+	447	MSTRG.100320	MSTRG.100320
MSTRG.100320.3	0	0	0.117083	0	0	0	0	2.89169	0	0	69	0	0	0	3	0	0	0	19	39159824	39161270	+	258	MSTRG.100320	MSTRG.100320
MSTRG.100320.4	0	0	0	0	0	0	1.76177	5.60905	0	61	187	0	0	0	0	0	0	0	19	39160592	39162142	+	362	MSTRG.100320	MSTRG.100320
MSTRG.100320.5	0.797109	0	0	0.188326	0	0	1.87142	0.015	2.41021	64	1	99	28	0	0	7	0	0	19	39160592	39162142	+	362	MSTRG.100320	MSTRG.100320
MSTRG.100321.1	1.74165	0	0	2.6735	0	0	0	0	0	0	0	0	41	0	0	66	0	0	19	39168825	39170194	+	246	MSTRG.100321	MSTRG.100321
MSTRG.100322.1	0.399882	0	0	0.084873	0	0.509943	2.29919	0.660836	0.712683	260	73	97	46	0	0	11	0	65	19	39208840	39211215	+	1197	MSTRG.100322	MSTRG.100322
MSTRG.100329.1	0	1.62191	0	0.64243	0	0	0	0	1.02898	0	0	64	0	85	0	35	0	0	19	39305146	39306360	-	541	MSTRG.100329	MSTRG.100329
MSTRG.100330.1	0	0	0	0.154271	0	3.32529	0	0	0	0	0	0	0	0	0	6	0	117	19	39434687	39435455	-	331	MSTRG.100330	MSTRG.100330
MSTRG.100331.1	0.603861	0	0	2.11454	0	0	0	0	1.45965	0	0	67	24	0	0	86	0	0	19	39442512	39443980	-	405	MSTRG.100331	MSTRG.100331
MSTRG.100332.1	0	0	0	0	0	1.91651	0	0	0	0	0	0	0	0	0	0	0	60	19	39446353	39447886	-	292	MSTRG.100332	MSTRG.100332
MSTRG.100333.1	1.35318	0	0	0	0.055258	0	0	1.70894	0	0	49	0	40	0	0	0	2	0	19	39446760	39448307	-	310	MSTRG.100333	MSTRG.100333
MSTRG.100334.1	0.310956	0	0.385978	0	1.74806	0	0	0.025136	0	0	2	0	15	0	19	0	76	0	19	39447054	39448781	-	494	MSTRG.100334	MSTRG.100334
MSTRG.100335.1	0	0	0	0	0	0	0	4.65649	0	0	102	0	0	0	0	0	0	0	19	39450000	39451451	-	239	MSTRG.100335	MSTRG.100335
MSTRG.100336.1	2.03259	0	0.447014	0.154208	0	0	1.39097	0	0	42	0	0	62	0	14	5	0	0	19	39450430	39451949	-	319	MSTRG.100336	MSTRG.100336
MSTRG.100337.1	1.69737	0	0	0	0.144416	0	0	0	0	0	0	0	41	0	0	0	4	0	19	39458341	39463310	-	251	MSTRG.100337	MSTRG.100337
MSTRG.100361.1	0	0	0	0.676811	0	0	2.28882	0	0	110	0	0	0	0	0	35	0	0	19	39503232	39504772	+	507	MSTRG.100361	MSTRG.100361
MSTRG.100361.2	0	0	0	0.462231	0	0	2.31867	0	0	60	0	0	0	0	0	13	0	0	19	39503232	39504537	+	273	MSTRG.100361	MSTRG.100361
MSTRG.100367.1	0	0	0	0	0	0	1.87771	0	0	57	0	0	0	0	0	0	0	0	19	39512628	39513828	+	319	MSTRG.100367	MSTRG.100367
MSTRG.100371.1	0	0	0.418169	0	0	0	0	2.42429	0	0	62	0	0	0	12	0	0	0	19	39520944	39522306	+	278	MSTRG.100371	MSTRG.100371
MSTRG.100383.2	0	0	0	0	0	0	0.361456	0	0	11	0	0	0	0	0	0	0	0	19	39540653	39541372	+	317	MSTRG.100383	MSTRG.100383
MSTRG.100423.1	0	0	0.810783	0	0.554863	1.38353	0	0	0	0	0	0	0	0	18	0	11	33	19	39814479	39815849	+	223	MSTRG.100423	MSTRG.100423
MSTRG.100424.1	0	0	0	0.873848	0	0	0	5.38407	0	0	113	0	0	0	0	20	0	0	19	39865838	39867178	+	229	MSTRG.100424	MSTRG.100424
MSTRG.100431.9	2.22599	1.81362	2.26139	2.75551	2.27235	0.226512	2.31234	3.29886	0.92833	511	709	247	492	410	521	645	465	57	19	39914620	39917826	-	2344	MSTRG.100431	MSTRG.100431
MSTRG.100432.1	1.35994	2.20828	0	0	1.77179	0	2.55181	0	0	80	0	0	43	71	0	0	52	0	19	39920003	39924809	-	332	MSTRG.100432	MSTRG.100432
MSTRG.100434.1	0	2.66268	0	0	0	0	0	0	0	0	0	0	0	52	0	0	0	0	19	39946095	39947196	-	202	MSTRG.100434	MSTRG.100434
MSTRG.100435.1	0.681258	3.79985	1.05902	1.71172	0	0	1.42511	1.39457	0.789566	66	63	44	32	180	51	84	0	0	19	39946160	39947547	+	490	MSTRG.100435	MSTRG.100435
MSTRG.100436.1	1.82272	1.20952	0	0	1.98402	0	0	0	0	0	0	0	56	38	0	0	57	0	19	39946608	39947838	+	325	MSTRG.100436	MSTRG.100436
MSTRG.100437.1	0	0.212198	0	0	0.132639	0	4.1945	0	0	146	0	0	0	8	0	0	5	0	19	39946687	39947960	-	368	MSTRG.100437	MSTRG.100437
MSTRG.100437.2	0	1.25484	0	0.172758	0	0	0.106613	1.45515	0	3	32	0	0	29	0	5	0	0	19	39946823	39947960	-	236	MSTRG.100437	MSTRG.100437
MSTRG.100440.1	2.45707	0	0	0	0	0	0	0	0	0	0	0	57	0	0	0	0	0	19	39951169	39952339	+	244	MSTRG.100440	MSTRG.100440
MSTRG.100442.1	0.102955	0	0	0	1.96876	0	0	0	0	0	0	0	3	0	0	0	53	0	19	39953168	39955133	+	305	MSTRG.100442	MSTRG.100442
MSTRG.100443.1	0.073365	1.38356	0	0	0	0	0	0	0	0	0	0	2	33	0	0	0	0	19	39953548	39955449	+	241	MSTRG.100443	MSTRG.100443
MSTRG.100451.1	0	0	0	0	3.61908	0	0	0	0	0	0	0	0	0	0	0	72	0	19	39968366	39969681	-	228	MSTRG.100451	MSTRG.100451
MSTRG.100453.1	0	0	0	0	0	0	1.72667	0	0	36	0	0	0	0	0	0	0	0	19	39973275	39975931	-	221	MSTRG.100453	MSTRG.100453
MSTRG.100470.1	0.420642	0.72637	2.55231	0.293579	0	0	2.34007	0	0.73627	152	0	58	28	49	173	21	0	0	19	40012751	40013473	+	688	MSTRG.100470	MSTRG.100470
MSTRG.100471.1	0	0	0	1.24251	0	0	0	3.52474	0	0	130	0	0	0	0	50	0	0	19	40013942	40015339	+	400	MSTRG.100471	MSTRG.100471
MSTRG.10049.1	2.26316	0	0	0	0	0	0	0	0	0	0	0	58	0	0	0	0	0	1	118713171	118714601	-	268	MSTRG.10049	MSTRG.10049
MSTRG.100496.1	0.589024	0	2.06466	0	0	0	0	0	0	0	0	0	12	0	42	0	0	0	19	40117078	40118387	+	207	MSTRG.100496	MSTRG.100496
MSTRG.100498.1	1.14908	0.946784	1.46076	0	0	0	0.978378	0	0	27	0	0	32	27	42	0	0	0	19	40119617	40120550	+	287	MSTRG.100498	MSTRG.100498
MSTRG.1005.1	0	0	1.49388	0	0	0	0	0	0	0	0	0	0	0	39	0	0	0	1	17974145	17974446	-	260	MSTRG.1005	MSTRG.1005
MSTRG.100507.1	0	0	0.368396	0	1.81808	0	0.929012	0	1.44919	46	0	86	0	0	19	0	83	0	19	40159511	40161044	-	522	MSTRG.100507	MSTRG.100507
MSTRG.100510.1	0	0	0.363484	0	0	0	0	0	3.41117	0	0	119	0	0	11	0	0	0	19	40166378	40167161	-	306	MSTRG.100510	MSTRG.100510
MSTRG.100510.2	1.50413	0	0	0.397323	0.442371	0	0	0	0	0	0	0	47	0	0	13	13	0	19	40166452	40167161	-	325	MSTRG.100510	MSTRG.100510
MSTRG.100524.10	0.658777	0	2.21212	0.510776	0.742006	0.887242	0.976927	0	0.769595	46	0	43	31	0	107	25	32	46	19	40197353	40199034	+	490	MSTRG.100524	MSTRG.100524
MSTRG.100524.6	0	0	0	2.20472	0.848893	0.102098	0	0	0	0	0	0	0	0	0	97	33	5	19	40193659	40195344	+	438	MSTRG.100524	MSTRG.100524
MSTRG.100524.8	0.096245	0	0	0	0	0.001328	0.16734	1.07577	0.381643	6	33	15	4	0	0	0	0	1	19	40195919	40196870	+	333	MSTRG.100524	MSTRG.100524
MSTRG.100524.9	0.445964	0	0.439652	0.576698	0	2.56129	2.87313	0.087986	2.53189	138	5	147	22	0	23	30	0	138	19	40197333	40199034	+	510	MSTRG.100524	MSTRG.100524
MSTRG.10054.1	2.87579	0	0	0	0	0	0	0	0	0	0	0	81	0	0	0	0	0	1	118780421	118781802	-	296	MSTRG.10054	MSTRG.10054
MSTRG.100544.6	2.32568	0	0	0	0.705333	0	0	0	0	0	0	0	50	0	0	0	14	0	19	40410583	40411737	-	224	MSTRG.100544	MSTRG.100544
MSTRG.100546.7	2.46813	0	1.34456	0.068135	0	0.206965	0	0.274077	0	0	11	0	96	0	55	3	0	10	19	40454141	40455295	-	412	MSTRG.100546	MSTRG.100546
MSTRG.100547.1	0	0	0	0	0	0	0	1.11337	0	0	23	0	0	0	0	0	0	0	19	40448664	40449645	+	223	MSTRG.100547	MSTRG.100547
MSTRG.100548.1	0	2.1635	0	0	0	0	0	2.71261	4.13106	0	82	154	0	69	0	0	0	0	19	40451415	40452934	+	328	MSTRG.100548	MSTRG.100548
MSTRG.10055.1	0	0	0	0	2.81925	0	0	0	1.01978	0	0	24	0	0	0	0	50	0	1	118788701	118789279	-	201	MSTRG.10055	MSTRG.10055
MSTRG.100551.1	0.081818	0	0	0	2.24323	0	0	0	0	0	0	0	2	0	0	0	48	0	19	40463555	40464990	-	242	MSTRG.100551	MSTRG.100551
MSTRG.100552.2	0	0	0	0	0	0	2.01317	0	0	122	0	0	0	0	0	0	0	0	19	40473027	40497418	+	643	MSTRG.100552	MSTRG.100552
MSTRG.100555.2	0	0	0	0	0.464637	0	0	0	0	0	0	0	0	0	0	0	70	0	19	40493181	40496084	-	1722	MSTRG.100555	MSTRG.100555
MSTRG.100558.5	1.52093	0	0	0	0	0	0	0	0	0	0	0	40	0	0	0	0	0	19	40514791	40517294	-	273	MSTRG.100558	MSTRG.100558
MSTRG.100558.6	0	0.934329	0	0	0	0	0	0	2.70589	0	0	151	0	45	0	0	0	0	19	40519468	40522508	-	491	MSTRG.100558	MSTRG.100558
MSTRG.100559.2	1.06098	0	0	0.406915	0	0	0	0	0	0	0	0	81	0	0	33	0	0	19	40514249	40515453	+	800	MSTRG.100559	MSTRG.100559
MSTRG.10056.1	0.030634	0	0	0	0.401861	1.42251	0.004365	0	0	1	0	0	2	0	0	0	14	57	1	118817773	118818943	-	374	MSTRG.10056	MSTRG.10056
MSTRG.100563.1	0	1.93506	0	0.139055	0.858968	0	0	0	0.200469	0	0	8	0	61	0	5	25	0	19	40524427	40525475	-	323	MSTRG.100563	MSTRG.100563
MSTRG.100566.1	0	0	0	2.07653	0	0	0	0	0	0	0	0	0	0	0	64	0	0	19	40526939	40528026	+	307	MSTRG.100566	MSTRG.100566
MSTRG.10057.1	0.168701	0	1.0218	0	1.03702	0	0	2.00895	0	0	58	0	5	0	32	0	29	0	1	118826111	118827607	-	314	MSTRG.10057	MSTRG.10057
MSTRG.100572.1	0	2.44429	0	0	0	0	0	0	0	0	0	0	0	75	0	0	0	0	19	40578841	40580322	-	318	MSTRG.100572	MSTRG.100572
MSTRG.100575.1	0.064682	0	1.63825	0	1.22891	0	0.594398	0	0	18	0	0	2	0	51	0	34	0	19	40678100	40679466	-	317	MSTRG.100575	MSTRG.100575
MSTRG.10058.1	0.080978	1.64227	0	0	0.529914	0	0.286512	0	0	8	0	0	3	43	0	0	13	0	1	118826596	118828045	-	269	MSTRG.10058	MSTRG.10058
MSTRG.100580.1	0.686847	1.09936	0	0.29467	2.78227	0.232057	0.195273	0.371223	0.487843	31	56	91	107	175	0	49	399	41	19	40693228	40695408	+	1644	MSTRG.100580	MSTRG.100580
MSTRG.100589.1	0	0	0	0	1.35741	0	0	0	0	0	0	0	0	0	0	0	31	0	19	40729722	40731217	-	256	MSTRG.100589	MSTRG.100589
MSTRG.10059.1	0	0	0	0	0	0	0	0	2.22726	0	0	62	0	0	0	0	0	0	1	118891822	118892906	-	245	MSTRG.10059	MSTRG.10059
MSTRG.100592.1	0.6898	0	1.30164	0	0	2.08042	0	0	0	0	0	0	15	0	28	0	0	49	19	40737701	40738536	+	219	MSTRG.100592	MSTRG.100592
MSTRG.100593.1	0	1.75512	0	0.31301	0	0	0	0	0.759635	0	0	25	0	48	0	9	0	0	19	40738984	40740217	+	283	MSTRG.100593	MSTRG.100593
MSTRG.100598.1	0	0	0	0	0	0	4.18809	0	0	106	0	0	0	0	0	0	0	0	19	40745135	40745949	+	267	MSTRG.100598	MSTRG.100598
MSTRG.100607.1	0.72012	1.48189	0	0	0	0	0	0	0	0	0	0	20	40	0	0	0	0	19	40777556	40779047	+	280	MSTRG.100607	MSTRG.100607
MSTRG.10061.1	0.275642	1.47314	0	0	0	0	0	0	0	0	0	0	9	45	0	0	0	0	1	118978619	118978953	-	312	MSTRG.10061	MSTRG.10061
MSTRG.100617.1	8.86941	4.34449	6.1771	3.00817	5.50623	6.86962	0.204117	3.72238	1.98453	13	219	145	537	269	390	193	309	466	19	40804796	40808599	+	642	MSTRG.100617	MSTRG.100617
MSTRG.100617.2	1.81109	2.08188	0.522159	1.07489	0.697578	0.451776	1.59372	1.26254	1.00974	162	125	123	184	216	56	116	66	52	19	40804835	40808599	+	1075	MSTRG.100617	MSTRG.100617
MSTRG.100617.3	2.4575	1.34002	0.978994	0.890939	0.221565	0.251913	0	0.956186	0.064599	0	42	4	110	62	46	43	10	13	19	40804840	40808005	+	473	MSTRG.100617	MSTRG.100617
MSTRG.100617.4	0.048837	0.012644	0	0	0	0	0	0	0.55885	0	0	19	2	1	0	0	0	0	19	40805488	40808474	+	297	MSTRG.100617	MSTRG.100617
MSTRG.100618.1	7.2375	4.72836	1.20573	0.692055	4.10587	3.41546	3.57428	2.41202	0.49419	285	188	48	578	386	101	59	304	306	19	40805995	40809541	+	847	MSTRG.100618	MSTRG.100618
MSTRG.100618.2	3.7183	5.45798	1.38398	1.0358	1.56196	2.22906	2.86101	3.30498	0.328503	229	257	32	297	446	116	88	116	200	19	40805995	40809541	+	847	MSTRG.100618	MSTRG.100618
MSTRG.100618.3	2.61609	0.571009	0.991143	1.38928	0.201373	0.553635	0.288125	3.97429	0.043139	23	309	5	209	47	83	118	15	50	19	40805995	40809541	+	847	MSTRG.100618	MSTRG.100618
MSTRG.10062.1	0.909836	0	1.9013	0.040201	0	0	0	0	0	0	0	0	25	0	54	2	0	0	1	118987036	118988388	-	284	MSTRG.10062	MSTRG.10062
MSTRG.10062.2	0.555719	0	0	0.831439	1.30724	2.15887	0	0	0	0	0	0	19	0	0	31	42	83	1	118987177	118988607	-	362	MSTRG.10062	MSTRG.10062
MSTRG.100625.1	0	0	0	0	0	0	0	2.98746	0	0	82	0	0	0	0	0	0	0	19	40826962	40828946	+	298	MSTRG.100625	MSTRG.100625
MSTRG.10063.1	0.285565	1.63143	0	0	0	1.56567	0	0	0	0	0	0	8	45	0	0	0	47	1	118987755	118989107	-	283	MSTRG.10063	MSTRG.10063
MSTRG.100634.6	1.38543	1.02207	0	0	0	2.48056	0	0	0.394203	0	0	14	39	30	0	0	0	78	19	40894902	40896233	+	297	MSTRG.100634	MSTRG.100634
MSTRG.100638.1	0.35386	0	0	0	0	0.256758	0	0	1.91914	0	0	107	17	0	0	0	0	14	19	40916822	40918512	-	492	MSTRG.100638	MSTRG.100638
MSTRG.10064.1	0.374224	0	0	2.23107	0.251299	0.20159	0	0	0	0	0	0	14	0	0	85	9	9	1	118989318	118990232	-	381	MSTRG.10064	MSTRG.10064
MSTRG.10064.2	1.03366	2.86757	0	0	0	0	0	0	0	0	0	0	21	58	0	0	0	0	1	118989748	118990490	-	208	MSTRG.10064	MSTRG.10064
MSTRG.100646.1	0	0	0	0	0	0	0	0	2.64293	0	0	74	0	0	0	0	0	0	19	40960166	40961663	-	245	MSTRG.100646	MSTRG.100646
MSTRG.10065.1	0	2.2137	0.199282	0.152564	0	1.97909	0	0	0	0	0	0	0	59	6	5	0	58	1	119004964	119008040	-	276	MSTRG.10065	MSTRG.10065
MSTRG.100652.1	0	0	0	0	0	0	2.6947	1.51782	0	86	48	0	0	0	0	0	0	0	19	40971356	40972563	+	339	MSTRG.100652	MSTRG.100652
MSTRG.10066.1	1.83882	1.29031	0.914889	1.7847	0.383088	2.30395	0	0	0	0	0	0	56	40	29	57	11	78	1	119033129	119038272	-	319	MSTRG.10066	MSTRG.10066
MSTRG.10067.1	0	0	0	0	0	4.11438	3.91657	0	0	98	0	0	0	0	0	0	0	116	1	119050057	119051036	-	265	MSTRG.10067	MSTRG.10067
MSTRG.100675.1	1.4752	0	0	0	0	0	0	0	0	0	0	0	35	0	0	0	0	0	19	41061681	41063210	-	245	MSTRG.100675	MSTRG.100675
MSTRG.100676.1	0.191461	0.376429	0	0.299263	0	2.49821	1.74261	0	0	110	0	0	13	25	0	20	0	176	19	41066204	41067888	-	666	MSTRG.100676	MSTRG.100676
MSTRG.100676.2	1.69501	0	0	0	0	0.40095	0	0	0	0	0	0	44	0	0	0	0	12	19	41066598	41067888	-	271	MSTRG.100676	MSTRG.100676
MSTRG.100677.1	0	0	0	0	0	6.15199	1.11732	0	2.8173	38	0	113	0	0	0	0	0	230	19	41069940	41071314	-	353	MSTRG.100677	MSTRG.100677
MSTRG.100677.2	0	0	0	0	0	0	0	0	3.39593	0	0	102	0	0	0	0	0	0	19	41069956	41071243	-	265	MSTRG.100677	MSTRG.100677
MSTRG.100678.1	5.08689	2.50383	2.09727	3.78411	2.88993	8.45499	4.27317	0	14.9823	669	0	2822	797	402	343	628	419	1484	19	41070334	41074207	-	1662	MSTRG.100678	MSTRG.100678
MSTRG.100678.2	4.12533	2.2234	1.46598	0.720907	1.38701	5.69213	4.12665	0.30564	3.67034	646	47	692	647	357	240	120	201	999	19	41070334	41074207	-	1662	MSTRG.100678	MSTRG.100678
MSTRG.100678.3	0	0	0	1.29476	0	0	0	0	0	0	0	0	0	0	0	150	0	0	19	41070794	41074207	-	1155	MSTRG.100678	MSTRG.100678
MSTRG.100683.1	2.12172	0	0	0	0	0	0	0	0	0	0	0	54	0	0	0	0	0	19	41113349	41114919	-	267	MSTRG.100683	MSTRG.100683
MSTRG.100699.1	0	0	1.76549	0	0	0	0	0	0	0	0	0	0	0	47	0	0	0	19	41213073	41214282	+	267	MSTRG.100699	MSTRG.100699
MSTRG.100700.1	0	0	1.99367	0	0	0	0	0	0	0	0	0	0	0	44	0	0	0	19	41238762	41255449	-	222	MSTRG.100700	MSTRG.100700
MSTRG.100713.7	1.01034	1.97311	0	0	0	0	0	0	0	0	0	0	39	78	0	0	0	0	19	41278886	41280515	-	406	MSTRG.100713	MSTRG.100713
MSTRG.100714.1	0	0	0	0.47263	0	1.06999	0.958952	0	0.87245	42	0	46	0	0	0	22	0	53	19	41277844	41279529	+	461	MSTRG.100714	MSTRG.100714
MSTRG.100714.2	0	0	0	0.6863	0	1.09173	0.168268	0	0.097221	8	0	6	0	0	0	32	0	54	19	41277844	41279529	+	461	MSTRG.100714	MSTRG.100714
MSTRG.100715.1	0	0	0	0.251806	0	0	5.44121	0	0	133	0	0	0	0	0	7	0	0	19	41278888	41280369	+	258	MSTRG.100715	MSTRG.100715
MSTRG.100716.1	2.17994	0	0.205989	0	3.57151	0	0	0	0	0	0	0	92	0	10	0	140	0	19	41284689	41287288	+	447	MSTRG.100716	MSTRG.100716
MSTRG.100719.1	0.780401	0	0	1.29572	0.431153	0	0	1.96362	0	0	53	0	22	0	0	38	11	0	19	41287630	41288819	+	290	MSTRG.100719	MSTRG.100719
MSTRG.100721.1	3.38794	0	2.17025	2.1409	1.36977	0.575739	2.02166	2.1841	0.651977	145	152	56	243	0	162	162	91	47	19	41290679	41293841	+	758	MSTRG.100721	MSTRG.100721
MSTRG.100721.2	0	3.49367	0.569248	0.396181	0	0	0	2.90078	0	0	104	0	0	131	22	16	0	0	19	41290712	41293504	+	388	MSTRG.100721	MSTRG.100721
MSTRG.100725.1	0	2.9329	0	0	0	0	0	0	0	0	0	0	0	80	0	0	0	0	19	41299134	41301269	+	281	MSTRG.100725	MSTRG.100725
MSTRG.100726.1	2.81661	1.37849	2.64717	1.20844	1.92372	1.38274	1.07058	4.75579	0.999651	58	250	65	153	77	149	70	97	84	19	41299888	41302316	+	573	MSTRG.100726	MSTRG.100726
MSTRG.100745.1	0.34357	0	0	0	0.516659	0	1.6017	3.49997	0.939123	113	240	80	25	0	0	0	34	0	19	41325964	41327159	+	746	MSTRG.100745	MSTRG.100745
MSTRG.100765.1	0.849868	2.20083	0.514308	1.32348	1.07641	0.022795	0.968649	0	0	64	0	0	56	148	36	92	66	2	19	41354898	41410958	+	695	MSTRG.100765	MSTRG.100765
MSTRG.100765.2	0.32973	2.72659	0	0	0.397222	0.432077	0.704111	4.0632	0	25	136	0	12	96	0	0	13	17	19	41410546	41413293	+	363	MSTRG.100765	MSTRG.100765
MSTRG.100804.1	0	0	0	0	0.312766	0	0	0	0	0	0	0	0	0	0	0	12	0	19	41468824	41470298	-	418	MSTRG.100804	MSTRG.100804
MSTRG.100804.2	0	0	0	0	0	0	0	0	0.811307	0	0	31	0	0	0	0	0	0	19	41468908	41470298	-	334	MSTRG.100804	MSTRG.100804
MSTRG.100804.3	0	0	0	0	0.114852	0	0.880172	0	0.358337	67	0	33	0	0	0	0	9	0	19	41468916	41470509	-	800	MSTRG.100804	MSTRG.100804
MSTRG.100804.4	0	0	0	0	0	0	0.063149	0	0.467304	2	0	13	0	0	0	0	0	0	19	41469214	41470509	-	239	MSTRG.100804	MSTRG.100804
MSTRG.100808.1	0.715624	0	0	0	3.37586	0	3.06525	1.19216	1.5768	93	36	58	22	0	0	0	95	0	19	41475751	41476994	-	322	MSTRG.100808	MSTRG.100808
MSTRG.100808.2	0.666666	0	0	0	2.23154	0	1.16157	0.843167	0.681955	32	23	23	19	0	0	0	57	0	19	41475781	41476994	-	292	MSTRG.100808	MSTRG.100808
MSTRG.100822.1	0.72718	0	2.48772	0	0	0	0	0	0	0	0	0	21	0	75	0	0	0	19	41493918	41495392	-	305	MSTRG.100822	MSTRG.100822
MSTRG.100839.1	0	0	0	0	0	0.491435	3.54181	0	0	82	0	0	0	0	0	0	0	13	19	41585291	41586502	+	246	MSTRG.100839	MSTRG.100839
MSTRG.100840.1	1.61154	5.74814	1.43848	0	2.16871	0	0.545412	2.11574	0.035792	28	102	3	80	292	75	0	100	0	19	41588321	41589970	+	526	MSTRG.100840	MSTRG.100840
MSTRG.100840.2	0.323875	2.17778	0.706248	0	1.54122	0	0	1.87619	0	0	83	0	15	101	34	0	65	0	19	41588370	41589970	+	477	MSTRG.100840	MSTRG.100840
MSTRG.100843.1	0.534266	0	0.163685	0	0	0	0.529298	0	1.55796	17	0	61	18	0	6	0	0	0	19	41593321	41594932	+	341	MSTRG.100843	MSTRG.100843
MSTRG.100843.2	1.40388	0	0	0	0	0	5.49444	0	1.14229	139	0	35	36	0	0	0	0	0	19	41594195	41595739	+	267	MSTRG.100843	MSTRG.100843
MSTRG.100863.1	0	3.12942	0	0.01678	0	0	0	0	0	0	0	0	0	86	0	1	0	0	19	41687969	41690323	+	283	MSTRG.100863	MSTRG.100863
MSTRG.100863.2	2.63749	0	0	0	0	0	0	0	0	0	0	0	67	0	0	0	0	0	19	41688001	41690323	+	268	MSTRG.100863	MSTRG.100863
MSTRG.100863.3	0	0	0	0	0	1.70518	1.21931	5.448	3.01612	36	153	105	0	0	0	0	0	55	19	41688685	41690323	+	305	MSTRG.100863	MSTRG.100863
MSTRG.100865.1	0	0	0	2.61948	0	1.17817	0	0	0	0	0	0	0	0	0	115	0	55	19	41698370	41699989	+	438	MSTRG.100865	MSTRG.100865
MSTRG.100866.1	0	1.09219	0.650122	0.152466	0	0	0	2.66457	0	0	152	0	0	66	40	10	0	0	19	41698567	41700368	+	622	MSTRG.100866	MSTRG.100866
MSTRG.100867.18	0	0	0	0.721167	0.321577	0	0	0	0.504093	0	0	23	0	0	0	29	12	0	19	41723959	41724913	-	395	MSTRG.100867	MSTRG.100867
MSTRG.100867.8	0.377076	0	1.73563	0.283351	0	0	0	0	0.615572	0	0	28	15	0	69	12	0	0	19	41703597	41705241	-	401	MSTRG.100867	MSTRG.100867
MSTRG.100867.9	0	0	0.086707	0	0	0	0	1.74618	0	0	35	0	0	0	2	0	0	0	19	41703780	41705241	-	218	MSTRG.100867	MSTRG.100867
MSTRG.100868.1	0.885087	0.837876	0.826652	0	2.15724	0	3.13664	0	0	62	0	0	18	17	17	0	39	0	19	41703090	41704546	-	207	MSTRG.100868	MSTRG.100868
MSTRG.100869.1	0.847111	0.035431	0.340813	0.5783	0	0	0.461526	0	0.968666	37	0	93	68	3	29	49	0	0	19	41712302	41714422	-	842	MSTRG.100869	MSTRG.100869
MSTRG.100869.2	0.535509	0.014363	0	1.2652	0	0	0.433989	0	0.070744	32	0	7	39	2	0	96	0	0	19	41712384	41714422	-	760	MSTRG.100869	MSTRG.100869
MSTRG.100869.3	0	0	0	0	0	0	0.784928	0	0	52	0	0	0	0	0	0	0	0	19	41712450	41714422	-	694	MSTRG.100869	MSTRG.100869
MSTRG.100869.4	0.1001	1.71715	0	0.036908	0	0	0.062305	0	0	4	0	0	6	94	0	3	0	0	19	41712576	41714422	-	568	MSTRG.100869	MSTRG.100869
MSTRG.10087.1	0	1.43821	0	0	0	0	0	0	0	0	0	0	0	32	0	0	0	0	1	120189050	120219495	-	230	MSTRG.10087	MSTRG.10087
MSTRG.100872.1	7.82755	4.7006	2.90951	3.84587	1.80936	3.23455	0	0.111537	4.49322	0	5	201	291	179	113	152	63	135	19	41745056	41746123	+	394	MSTRG.100872	MSTRG.100872
MSTRG.100895.1	0	0	0	0	0	0	0	1.73788	0	0	45	0	0	0	0	0	0	0	19	41856029	41857047	+	278	MSTRG.100895	MSTRG.100895
MSTRG.100895.2	0	0	0	0	0	0	0	1.43729	0	0	37	0	0	0	0	0	0	0	19	41856029	41857047	+	278	MSTRG.100895	MSTRG.100895
MSTRG.100897.1	0.570077	2.56001	0	0	0	0	0	0	0	0	0	0	18	82	0	0	0	0	19	41858396	41859660	-	330	MSTRG.100897	MSTRG.100897
MSTRG.100908.12	0.588267	0.321173	1.18477	1.70324	2.10335	0	0.506521	0	0	42	0	0	48	27	101	147	159	0	19	42025028	42026998	+	862	MSTRG.100908	MSTRG.100908
MSTRG.100909.1	0	0	0	2.68453	0	0	0	0	1.46602	0	0	69	0	0	0	111	0	0	19	41922216	41923549	+	412	MSTRG.100909	MSTRG.100909
MSTRG.100910.1	1.37907	2.60197	2.65771	0.66471	0.770571	0	1.6625	1.25709	0	132	97	0	110	211	219	56	57	0	19	41929132	41930477	+	839	MSTRG.100910	MSTRG.100910
MSTRG.100911.1	2.47784	1.60789	1.73635	0.581612	0	0.844778	1.8608	1.7442	1.60631	96	88	100	128	85	93	32	0	49	19	41942251	41943639	+	545	MSTRG.100911	MSTRG.100911
MSTRG.100911.2	1.08629	0.147729	2.10786	2.18137	0	0.301873	0.086311	2.32586	0	5	112	0	54	8	109	114	0	17	19	41942274	41943639	+	522	MSTRG.100911	MSTRG.100911
MSTRG.100912.1	0.074571	0	0	0	2.4254	0	0	0	0	0	0	0	2	0	0	0	51	0	19	41948281	41949016	+	239	MSTRG.100912	MSTRG.100912
MSTRG.100913.1	0	0	2.10032	0.287216	0	0	0	0	0.071757	0	0	2	0	0	45	7	0	0	19	41952679	41953794	-	217	MSTRG.100913	MSTRG.100913
MSTRG.100914.1	1.42284	3.16563	0.966284	0.624465	0.647708	0.822712	2.97066	2.96056	0	365	354	0	175	398	124	82	74	114	19	41959819	41963257	+	1303	MSTRG.100914	MSTRG.100914
MSTRG.100915.1	1.50706	4.46262	2.22641	0.359707	0	0	1.09946	0	1.55819	35	0	59	47	142	73	12	0	0	19	41964795	41970708	+	330	MSTRG.100915	MSTRG.100915
MSTRG.100916.1	0.093007	0.733004	0.596947	0.151986	0	2.14071	0.879873	0.208185	0	49	12	0	6	42	35	9	0	132	19	41966757	41971319	+	584	MSTRG.100916	MSTRG.100916
MSTRG.100919.1	3.80816	0	1.30928	2.08203	0	0	3.04512	1.3638	0	122	53	0	152	0	55	88	0	0	19	42021037	42022604	+	423	MSTRG.100919	MSTRG.100919
MSTRG.100919.2	0.246659	1.58868	0.341435	0.673477	1.78261	2.83737	0	0.325519	1.25374	0	22	102	17	110	25	49	112	215	19	42021062	42022921	+	716	MSTRG.100919	MSTRG.100919
MSTRG.100919.3	0.397097	3.24307	0.754318	0.537253	0	0	0	0.823187	0	0	23	0	11	92	22	16	0	0	19	42021591	42023026	+	292	MSTRG.100919	MSTRG.100919
MSTRG.100920.2	0	0	0.103536	0	0	0	3.25846	0	0	62	0	0	0	0	3	0	0	0	19	42030132	42031244	-	202	MSTRG.100920	MSTRG.100920
MSTRG.100920.5	1.817	0	0.136631	0	1.23391	0	1.899	0.241522	0	46	6	0	44	0	4	0	28	0	19	42033847	42035226	-	254	MSTRG.100920	MSTRG.100920
MSTRG.100920.7	1.73206	0.031725	0.360494	0.251385	1.73758	0.487196	1.08623	0.338763	0	65	20	0	103	2	23	16	96	33	19	42037308	42039092	-	628	MSTRG.100920	MSTRG.100920
MSTRG.100923.1	3.56877	1.4438	1.11892	1.19146	2.03171	0.281489	1.05594	0.474879	1.07779	112	49	138	378	157	124	134	199	34	19	42033860	42036103	+	1122	MSTRG.100923	MSTRG.100923
MSTRG.100923.2	0	0.354935	0.261393	0	0	1.30255	0	0.465727	1.86269	0	21	101	0	17	13	0	0	66	19	42034507	42036103	+	475	MSTRG.100923	MSTRG.100923
MSTRG.100925.1	0.727219	0	0.325061	0	1.64672	0.620465	0.537033	0.297791	1.73666	24	13	91	32	0	15	0	67	31	19	42036690	42038309	-	461	MSTRG.100925	MSTRG.100925
MSTRG.100927.1	0	0	0.121311	2.66146	1.82827	0	0.516476	0	0.288953	12	0	8	0	0	3	63	38	0	19	42048075	42049563	-	237	MSTRG.100927	MSTRG.100927
MSTRG.100933.1	0.476671	0	0.255129	0	0.266405	2.04603	1.65748	0.946971	0	81	46	0	24	0	14	0	13	113	19	42072284	42073709	-	519	MSTRG.100933	MSTRG.100933
MSTRG.100934.1	0	1.81923	2.32138	0	2.41235	0	0.121285	0.643519	0	8	41	0	0	120	156	0	144	0	19	42072871	42074459	-	681	MSTRG.100934	MSTRG.100934
MSTRG.100934.2	0	0.286812	0	0	0	0	0	0.528147	0	0	23	0	0	14	0	0	0	0	19	42073074	42074459	-	474	MSTRG.100934	MSTRG.100934
MSTRG.100936.1	0.323846	0	0	0.988231	1.16829	0	0.887725	0	0	54	0	0	20	0	0	63	66	0	19	42086735	42088439	-	639	MSTRG.100936	MSTRG.100936
MSTRG.100937.1	0.610019	0	0	0	0	0	1.45619	0	0	43	0	0	18	0	0	0	0	0	19	42095262	42098002	-	311	MSTRG.100937	MSTRG.100937
MSTRG.100937.2	0.264014	0	0	2.62367	0	0	1.10055	0	0	29	0	0	7	0	0	74	0	0	19	42095269	42097977	-	279	MSTRG.100937	MSTRG.100937
MSTRG.100940.10	1.55491	2.93295	2.02582	0.479534	1.1676	0.696903	2.84717	1.74349	0	225	134	0	123	237	167	40	86	62	19	42115976	42118081	-	836	MSTRG.100940	MSTRG.100940
MSTRG.100940.11	0.608327	0.649879	0.617766	0	3.03892	0.944178	5.16875	2.62491	0	151	75	0	18	20	19	0	83	31	19	42117161	42118751	-	310	MSTRG.100940	MSTRG.100940
MSTRG.100941.1	0	0	0	0.051579	1.93078	0	0	0	0.653786	0	0	24	0	0	0	2	53	0	19	42112541	42114092	-	311	MSTRG.100941	MSTRG.100941
MSTRG.100941.2	0	1.86155	0	0	0	0.011085	0	0	0	0	0	0	0	76	0	0	0	1	19	42112753	42114413	-	420	MSTRG.100941	MSTRG.100941
MSTRG.100942.1	2.33282	0	0	0.284396	0	0	0.236121	0	0	12	0	0	117	0	0	15	0	0	19	42119949	42121726	-	528	MSTRG.100942	MSTRG.100942
MSTRG.100954.1	0	0	2.1552	0	0.108373	0	0	0	0	0	0	0	0	0	58	0	3	0	19	42171258	42175916	-	271	MSTRG.100954	MSTRG.100954
MSTRG.100954.2	0.103327	0	0.412989	0	0.834153	0	0	2.69048	0.896824	0	105	43	5	0	18	0	31	0	19	42171260	42174924	-	423	MSTRG.100954	MSTRG.100954
MSTRG.100957.1	0	0	0	0	0	1.38958	0	0	0	0	0	0	0	0	0	0	0	41	19	42560129	42560449	+	273	MSTRG.100957	MSTRG.100957
MSTRG.100978.1	0	5.19599	0	0	0	0	0	0	0	0	0	0	0	137	0	0	0	0	19	42999273	43000747	-	272	MSTRG.100978	MSTRG.100978
MSTRG.100979.1	0.023	1.52192	0	0	0	0	0.224602	0	0	6	0	0	1	37	0	0	0	0	19	43047725	43049198	-	246	MSTRG.100979	MSTRG.100979
MSTRG.100980.1	1.59358	0.859145	0.595678	0	0.413485	0	0.805676	0	0.406558	55	0	34	109	61	43	0	27	0	19	43048659	43050608	-	725	MSTRG.100980	MSTRG.100980
MSTRG.100986.1	0	0	0.080497	0	0	0	2.97512	0	0	77	0	0	0	0	3	0	0	0	19	43076468	43079772	+	275	MSTRG.100986	MSTRG.100986
MSTRG.10099.1	1.35406	0	0	1.98239	0.210521	0.810692	0	0	1.13732	0	0	51	51	0	0	78	8	34	1	120214527	120216044	-	394	MSTRG.10099	MSTRG.10099
MSTRG.10099.2	0	0.241059	0.858719	0	0.097342	0	0.223406	1.928	0	14	115	0	0	16	55	0	6	0	1	120214534	120216306	-	650	MSTRG.10099	MSTRG.10099
MSTRG.101.1	0	0	0	0	1.52947	0	0	0	0	0	0	0	0	0	0	0	30	0	1	6738214	6746872	+	221	MSTRG.101	MSTRG.101
MSTRG.10101.1	3.55506	3.52426	2.81844	0.96588	2.05358	0.949193	3.68502	3.68192	3.01938	320	312	316	309	314	256	89	166	93	1	120232165	120233670	+	922	MSTRG.10101	MSTRG.10101
MSTRG.10101.2	0	0.128551	0	0	0.239375	0.232323	0	0	0	0	0	0	0	9	0	0	14	17	1	120232417	120233670	+	670	MSTRG.10101	MSTRG.10101
MSTRG.101049.1	0	0	0	0	0	0	3.25846	0	0	62	0	0	0	0	0	0	0	0	19	43366074	43367338	-	201	MSTRG.101049	MSTRG.101049
MSTRG.101050.1	0	0	0	0	0	0	0	3.07238	0	0	88	0	0	0	0	0	0	0	19	43368802	43370394	-	312	MSTRG.101050	MSTRG.101050
MSTRG.101056.1	0	0	2.40513	0	0	0	0	0	0	0	0	0	0	0	77	0	0	0	19	43414291	43415416	-	324	MSTRG.101056	MSTRG.101056
MSTRG.101063.2	1.24226	0.799481	2.23687	2.39313	0.370119	0.944755	3.36278	1.14142	1.40606	273	91	138	101	67	190	206	28	86	19	43483014	43485772	+	862	MSTRG.101063	MSTRG.101063
MSTRG.101068.1	0.998996	2.03848	0	0.25653	2.05356	0.254879	0.997206	0	0	31	0	0	31	64	0	9	58	9	19	43438975	43443660	+	322	MSTRG.101068	MSTRG.101068
MSTRG.101068.2	0	1.96353	0.168315	0.717414	0	3.83661	0.687581	0	0	31	0	0	0	89	8	34	0	190	19	43440007	43443660	+	467	MSTRG.101068	MSTRG.101068
MSTRG.101068.3	0.734585	2.74571	4.09085	1.0135	0.312658	1.60018	0	0	0	0	0	0	33	124	188	48	13	79	19	43440007	43443660	+	467	MSTRG.101068	MSTRG.101068
MSTRG.101068.4	2.57493	0	0	0.37725	0	0	0	0	0	0	0	0	80	0	0	13	0	0	19	43442981	43443660	+	326	MSTRG.101068	MSTRG.101068
MSTRG.101069.1	0	0	0.876836	0.728918	1.04628	0.872748	0.571033	1.15112	1.60095	37	73	125	0	0	59	50	63	64	19	43441277	43445271	+	685	MSTRG.101069	MSTRG.101069
MSTRG.101069.2	0	0	0	0.101208	0.875506	1.4107	0	2.47116	0	0	79	0	0	0	0	4	27	52	19	43442112	43445018	+	346	MSTRG.101069	MSTRG.101069
MSTRG.101069.3	0.686181	2.95904	1.2504	1.1867	2.19502	1.00968	0	1.26473	0.979998	0	160	153	90	393	170	163	264	147	19	43442370	43446312	+	1377	MSTRG.101069	MSTRG.101069
MSTRG.101071.4	5.07671	0.470227	1.51786	2.79966	1.54923	5.98375	6.27211	4.26682	9.02891	510	338	883	413	40	129	241	117	546	19	43473082	43475125	+	863	MSTRG.101071	MSTRG.101071
MSTRG.101072.1	5.42853	3.65526	3.98477	6.08211	4.7618	2.98472	3.72644	5.60215	0.73864	528	773	126	770	530	589	913	625	474	19	43476470	43478611	+	1504	MSTRG.101072	MSTRG.101072
MSTRG.101072.2	1.54321	0.180932	0.830147	0.424854	0.013853	2.22344	0.20733	3.87309	0.515503	16	288	48	118	15	66	35	1	190	19	43477165	43478611	+	809	MSTRG.101072	MSTRG.101072
MSTRG.101072.3	0.234068	0.225465	0.316355	3.11524	0.250748	0.325177	0	2.74863	0.019146	0	117	2	11	11	15	145	11	16	19	43477505	43478611	+	464	MSTRG.101072	MSTRG.101072
MSTRG.101073.1	4.93767	0.886602	6.32714	1.97477	14.2191	4.24213	5.18865	4.74183	2.0563	181	161	87	173	32	230	73	459	166	19	43480810	43482263	+	370	MSTRG.101073	MSTRG.101073
MSTRG.101074.1	15.3127	3.74043	7.19478	5.29624	9.25821	3.56066	9.90768	12.2344	3.09745	1690	2032	636	2616	654	1280	958	1463	681	19	43492158	43494203	+	1812	MSTRG.101074	MSTRG.101074
MSTRG.101075.1	3.36525	0.635556	3.05533	0.811763	2.62893	0.836661	4.06241	1.2279	3.12157	90	27	84	75	15	71	20	54	21	19	43495479	43496488	+	235	MSTRG.101075	MSTRG.101075
MSTRG.101075.2	7.45507	1.68521	3.8758	2.90006	5.8373	4.18852	4.30052	8.23709	0.960308	562	1047	151	975	226	528	402	706	614	19	43495543	43497704	+	1387	MSTRG.101075	MSTRG.101075
MSTRG.101076.1	5.5424	4.30616	5.8305	4.42906	2.58988	7.95643	7.84475	3.42382	5.30053	821	349	668	581	462	637	492	252	934	19	43514702	43516803	+	1112	MSTRG.101076	MSTRG.101076
MSTRG.101077.1	4.51053	1.7013	1.35779	1.06309	4.93896	2.04621	3.02089	12.0177	2.10878	211	815	177	315	122	99	79	319	160	19	43515536	43517264	+	740	MSTRG.101077	MSTRG.101077
MSTRG.101078.1	2.43864	0.545573	0.672585	1.779	3.84727	6.42995	1.66493	2.61784	2.57262	255	389	473	373	86	108	288	544	1101	19	43538083	43540184	+	1621	MSTRG.101078	MSTRG.101078
MSTRG.101079.1	7.95941	2.83029	5.37583	7.00594	7.3102	3.53649	4.071	8.12275	4.98173	535	1038	787	1046	381	736	975	889	521	19	43549960	43552181	+	1394	MSTRG.101079	MSTRG.101079
MSTRG.101080.1	7.81386	1.97636	5.05231	6.51456	11.072	7.16458	8.6758	9.07572	3.48151	692	705	335	624	162	421	551	818	641	19	43568802	43570816	+	847	MSTRG.101080	MSTRG.101080
MSTRG.101084.1	0.860767	0.445596	1.79932	0	1.52839	0	0	0	0	0	0	0	23	13	50	0	38	0	19	43584429	43585187	+	281	MSTRG.101084	MSTRG.101084
MSTRG.101085.1	0.48569	0.375583	0	2.48515	0.793952	1.26212	0	0	0	0	0	0	21	17	0	111	31	60	19	43592165	43593676	+	445	MSTRG.101085	MSTRG.101085
MSTRG.101085.2	0.229084	0	0	0	0	0	0	2.32824	0	0	59	0	6	0	0	0	0	0	19	43593223	43594562	+	276	MSTRG.101085	MSTRG.101085
MSTRG.101086.1	1.41448	0	0	0	0	0	0	0	0	0	0	0	32	0	0	0	0	0	19	43600186	43601358	+	236	MSTRG.101086	MSTRG.101086
MSTRG.101087.1	0.235327	0	0	1.90808	1.86857	0	0	0	0	0	0	0	7	0	0	54	46	0	19	43600447	43601654	+	281	MSTRG.101087	MSTRG.101087
MSTRG.101088.1	0	0.811072	0.57393	2.3562	0	0	0	0	0.995044	0	0	43	0	30	22	89	0	0	19	43602074	43604524	+	376	MSTRG.101088	MSTRG.101088
MSTRG.101088.2	1.10374	1.91374	0	1.72657	0	0	0	0	1.32605	0	0	57	40	70	0	65	0	0	19	43602074	43604524	+	376	MSTRG.101088	MSTRG.101088
MSTRG.101089.1	0	3.70943	0	0	0	0	0	0	0	0	0	0	0	89	0	0	0	0	19	43621354	43622785	+	248	MSTRG.101089	MSTRG.101089
MSTRG.101090.1	1.6338	0	0	1.31866	0.275575	0	0.414683	0	0.781674	17	0	38	66	0	0	56	11	0	19	43628663	43631820	+	425	MSTRG.101090	MSTRG.101090
MSTRG.101091.1	0.350648	0	1.44747	0.34566	0.126385	0	0	0.377851	0	0	13	0	12	0	51	13	4	0	19	43630054	43633145	+	357	MSTRG.101091	MSTRG.101091
MSTRG.101095.1	1.45367	0	0	0	1.22985	0	0	0	0.372611	0	0	14	44	0	0	0	34	0	19	43665732	43667253	-	314	MSTRG.101095	MSTRG.101095
MSTRG.101096.1	0	0	0	2.26038	1.60224	0	0	2.63356	0	0	94	0	0	0	0	88	55	0	19	43665946	43667540	+	387	MSTRG.101096	MSTRG.101096
MSTRG.101097.7	0.426565	0	0	0.672573	0.635012	0	0.415622	1.64511	0	23	87	0	24	0	0	39	32	0	19	43674416	43676140	-	573	MSTRG.101097	MSTRG.101097
MSTRG.101098.1	0	4.41022	0	0.224277	0.862241	0	0	0	0	0	0	0	0	154	0	9	28	0	19	43673649	43675160	-	360	MSTRG.101098	MSTRG.101098
MSTRG.101099.12	1.78327	0.541442	0.157963	1.72687	1.51684	0.624755	0.721202	2.52989	0.635138	68	231	72	167	52	16	172	132	66	19	43745422	43746594	+	993	MSTRG.101099	MSTRG.101099
MSTRG.101099.15	1.04964	0	0	0	0	1.38665	0.518482	0.050863	0.699462	22	3	35	43	0	0	0	0	64	19	43757461	43758765	+	432	MSTRG.101099	MSTRG.101099
MSTRG.101099.16	0.791058	0	2.13326	0.914587	0	0	0	0	0	0	0	0	20	0	56	24	0	0	19	43772931	43774070	+	263	MSTRG.101099	MSTRG.101099
MSTRG.101099.17	0.506328	0	1.08682	1.2597	0	0	0	0	0	0	0	0	11	0	25	29	0	0	19	43772966	43774070	+	228	MSTRG.101099	MSTRG.101099
MSTRG.101104.1	2.85294	0.353711	0	1.0322	1.37553	0	4.93805	0	1.12397	214	0	59	124	16	0	48	56	0	19	43711610	43713197	+	460	MSTRG.101104	MSTRG.101104
MSTRG.101112.1	1.05185	0	0.160303	1.2052	0	0	2.29532	0	0	82	0	0	38	0	6	46	0	0	19	43820866	43822509	+	377	MSTRG.101112	MSTRG.101112
MSTRG.101122.6	1.89033	0	0	1.84634	0	0.97482	0	1.83702	0	0	59	0	62	0	0	64	0	36	19	43960028	43961591	+	346	MSTRG.101122	MSTRG.101122
MSTRG.101123.1	0.691848	1.78367	0.877133	0	0.37816	0.563678	0	0	1.35193	0	0	60	26	67	34	0	13	23	19	43938991	43940123	+	386	MSTRG.101123	MSTRG.101123
MSTRG.101123.2	0.094668	0.135932	0.740637	0	0	0	0	0	0	0	0	0	3	4	19	0	0	0	19	43939116	43940123	+	261	MSTRG.101123	MSTRG.101123
MSTRG.101123.3	0.943377	0.784982	0.461205	0	0	1.90006	0	0	1.71194	0	0	46	21	18	11	0	0	48	19	43939221	43940202	+	235	MSTRG.101123	MSTRG.101123
MSTRG.101124.1	0	0	4.26064	0.676881	0	0	0	0	0	0	0	0	0	0	139	23	0	0	19	43941226	43942663	+	330	MSTRG.101124	MSTRG.101124
MSTRG.101125.1	2.38423	0	0.319143	0.910842	2.22455	0	0	0	0	0	0	0	219	0	31	89	189	0	19	43941800	43943869	+	971	MSTRG.101125	MSTRG.101125
MSTRG.101125.2	1.34323	1.48729	0.950325	0.074029	0.170944	0	0.040415	1.79384	1.02858	4	160	114	123	140	91	8	15	0	19	43941800	43943869	+	971	MSTRG.101125	MSTRG.101125
MSTRG.101126.1	0.847116	1.10255	0.53415	0.643084	0.597528	1.32624	1.20588	1.64673	0.952305	168	224	160	119	158	78	95	78	208	19	43949145	43951319	+	1480	MSTRG.101126	MSTRG.101126
MSTRG.101126.2	0	0	1.6592	0	0	0.141793	0.874599	0.140636	0	29	5	0	0	0	56	0	0	6	19	43950333	43951370	+	343	MSTRG.101126	MSTRG.101126
MSTRG.101126.3	0.401231	0	0	0	0	0	0.240789	0	0.634562	7	0	21	11	0	0	0	0	0	19	43950391	43951370	+	285	MSTRG.101126	MSTRG.101126
MSTRG.10113.1	0	2.74516	0	0	0	0	0	0	0	0	0	0	0	84	0	0	0	0	1	120346664	120349294	-	315	MSTRG.10113	MSTRG.10113
MSTRG.101136.2	0	1.92193	0.216483	0	0	0	0	0	0	0	0	0	0	41	5	0	0	0	19	44045914	44046771	+	221	MSTRG.101136	MSTRG.101136
MSTRG.101137.1	0	0	1.73962	0	0	0	0	0	0	0	0	0	0	0	36	0	0	0	19	44046085	44046931	-	210	MSTRG.101137	MSTRG.101137
MSTRG.101141.15	0.302766	0.147067	0.207382	0.186773	0	0.783735	1.7749	0.012252	0.544337	257	2	95	44	22	32	29	0	128	19	44071875	44074179	+	1537	MSTRG.101141	MSTRG.101141
MSTRG.101146.1	0	0	0	0	0	2.32454	0	0	0	0	0	0	0	0	0	0	0	76	19	44080485	44081645	-	309	MSTRG.101146	MSTRG.101146
MSTRG.101147.1	0	0	0	0	0	0.271616	0.030072	0	1.44321	2	0	112	0	0	0	0	0	20	19	44080901	44084633	+	683	MSTRG.101147	MSTRG.101147
MSTRG.101147.2	0	0	0	0.557947	0	0.444502	3.17792	0	0.010937	90	0	1	0	0	0	17	0	15	19	44082366	44084862	+	299	MSTRG.101147	MSTRG.101147
MSTRG.101177.1	0	2.87089	0	0	0	0	0	0	0	0	0	0	0	58	0	0	0	0	19	44674784	44677019	-	208	MSTRG.101177	MSTRG.101177
MSTRG.101202.1	0	0	0	2.39586	0	0	0	0	0	0	0	0	0	0	0	72	0	0	19	44761313	44762829	-	299	MSTRG.101202	MSTRG.101202
MSTRG.101251.3	0.419554	3.02885	0.23452	1.2073	0	4.64522	2.1932	2.43073	5.20096	92	99	262	18	130	11	54	0	218	19	44984159	44985819	+	443	MSTRG.101251	MSTRG.101251
MSTRG.101258.1	1.69291	2.62837	1.31009	2.61656	0	0.086376	2.68451	9.49954	0	89	306	0	57	89	46	92	0	4	19	45010855	45011742	-	351	MSTRG.101258	MSTRG.101258
MSTRG.101261.1	1.38234	0	1.05344	0.049834	0.551571	0.762778	0.828665	1.52846	1.33209	187	335	361	312	0	248	12	115	193	19	45054313	45057518	-	2390	MSTRG.101261	MSTRG.101261
MSTRG.101261.2	1.52295	0.433417	2.55987	1.02293	1.31852	0.552598	1.53415	1.56687	0.081735	216	215	14	215	63	376	153	172	88	19	45056643	45058952	-	1493	MSTRG.101261	MSTRG.101261
MSTRG.101261.3	1.11574	0	0	0	0.248607	0	0	0.274607	0.447333	0	38	75	155	0	0	0	32	0	19	45056668	45058952	-	1473	MSTRG.101261	MSTRG.101261
MSTRG.101264.5	0.533407	0.511562	0.597813	0.171569	0.952663	0	0.964121	1.30174	0	54	71	0	30	30	35	11	50	0	19	45216129	45217716	+	592	MSTRG.101264	MSTRG.101264
MSTRG.101265.1	1.95699	0	0.034639	0	0	0	0.330242	0	0.074432	10	0	3	54	0	1	0	0	0	19	45150605	45152108	+	290	MSTRG.101265	MSTRG.101265
MSTRG.101265.2	0.228193	0	0.830633	0	0	0	0.47515	0	1.51269	10	0	37	5	0	18	0	0	0	19	45150605	45152029	+	211	MSTRG.101265	MSTRG.101265
MSTRG.101266.1	4.74611	3.67709	2.07365	0	2.63722	0.839838	2.57248	1.40737	0.688879	486	259	157	898	712	409	0	462	178	19	45156451	45158795	+	2007	MSTRG.101266	MSTRG.101266
MSTRG.101267.1	0	3.13348	0	1.14377	2.51448	0	0	0	0	0	0	0	0	86	0	33	63	0	19	45168583	45169124	+	284	MSTRG.101267	MSTRG.101267
MSTRG.101268.1	0	1.3791	3.80961	0	1.35334	0	0	2.29163	0	0	66	0	0	42	116	0	37	0	19	45179377	45180216	+	310	MSTRG.101268	MSTRG.101268
MSTRG.101269.1	0.141448	0	0.733317	0	0	2.32031	0	0	0	0	0	0	5	0	24	0	0	81	19	45179823	45180685	+	329	MSTRG.101269	MSTRG.101269
MSTRG.101271.1	0.66211	1.72418	3.22914	0	0.158046	0.926383	0	0	0	0	0	0	27	70	134	0	6	42	19	45188701	45189559	+	420	MSTRG.101271	MSTRG.101271
MSTRG.101272.1	0	0	0	0.054257	0	0	5.00546	0	0	150	0	0	0	0	0	2	0	0	19	45194881	45196255	+	317	MSTRG.101272	MSTRG.101272
MSTRG.101277.1	0	0	0	0	0	0	0	0	1.66656	0	0	58	0	0	0	0	0	0	19	45228207	45229258	+	306	MSTRG.101277	MSTRG.101277
MSTRG.101278.1	0	1.00664	0	0	0	1.30276	0	0	1.09241	0	0	31	0	24	0	0	0	34	19	45228611	45229602	+	243	MSTRG.101278	MSTRG.101278
MSTRG.101282.1	0	0	0	0	0	0	0	0	2.70633	0	0	81	0	0	0	0	0	0	19	45245625	45245908	+	261	MSTRG.101282	MSTRG.101282
MSTRG.101298.1	0	0	0	0	0	0	0.879196	4.10886	0	20	90	0	0	0	0	0	0	0	19	45303661	45304671	-	239	MSTRG.101298	MSTRG.101298
MSTRG.101310.7	2.23835	0	0	0	0	0	0	0	0	0	0	0	69	0	0	0	0	0	19	45389798	45390231	+	325	MSTRG.101310	MSTRG.101310
MSTRG.101310.8	1.90275	0	0	0.371544	1.04154	0	0.922646	0	0	43	0	0	88	0	0	19	45	0	19	45424278	45425921	+	489	MSTRG.101310	MSTRG.101310
MSTRG.101310.9	0	0	0	0	0	0	0.855181	0	0	30	0	0	0	0	0	0	0	0	19	45424399	45425921	+	368	MSTRG.101310	MSTRG.101310
MSTRG.101311.1	0.830147	0	0	0.113559	0	0.587064	0	0.853313	0.603754	0	49	43	49	0	0	8	0	39	19	45348989	45350383	+	618	MSTRG.101311	MSTRG.101311
MSTRG.101312.1	0	0	0	2.94085	0	0	0	0	0	0	0	0	0	0	0	65	0	0	19	45382290	45382978	+	221	MSTRG.101312	MSTRG.101312
MSTRG.101313.1	1.73603	0	0	0	0.33441	0.476395	0	0	2.05268	0	0	110	78	0	0	0	14	24	19	45414800	45415294	+	472	MSTRG.101313	MSTRG.101313
MSTRG.101314.1	2.98811	0.719958	0.596706	0.365209	0.72086	1.18351	0.053487	1.38939	1.02739	8	189	173	417	103	87	54	93	185	19	45441375	45444032	+	1478	MSTRG.101314	MSTRG.101314
MSTRG.101315.1	1.0389	1.47725	1.49709	0	2.38895	0	0	0	0	0	0	0	38	55	57	0	80	0	19	45442743	45444303	+	381	MSTRG.101315	MSTRG.101315
MSTRG.101316.1	0.19912	0.824376	4.16663	0.572745	0	0.500886	0.600877	1.18097	0.020839	60	115	3	20	85	434	61	0	56	19	45443011	45445251	+	1059	MSTRG.101316	MSTRG.101316
MSTRG.101316.2	0.720643	0	1.31429	0.105344	2.20747	0	0	0	0	0	0	0	30	0	57	5	84	0	19	45443065	45444682	+	436	MSTRG.101316	MSTRG.101316
MSTRG.101316.3	2.65128	0.278905	0.508918	0	0.874791	0	1.65805	1.13513	1.69498	131	88	161	210	23	42	0	64	0	19	45443233	45445251	+	837	MSTRG.101316	MSTRG.101316
MSTRG.101316.4	0.73291	0.108961	0.042135	0	0.090958	0	0	0.002563	0.11201	0	1	8	40	7	3	0	5	0	19	45443233	45444989	+	575	MSTRG.101316	MSTRG.101316
MSTRG.101317.1	1.16276	0.120285	0	0.027656	2.66722	0	0.407669	0	0	38	0	0	108	12	0	3	228	0	19	45451077	45452162	+	980	MSTRG.101317	MSTRG.101317
MSTRG.101317.2	0	0	0.504911	1.90427	0	0	0	0	0	0	0	0	0	0	42	160	0	0	19	45451270	45452162	+	840	MSTRG.101317	MSTRG.101317
MSTRG.101320.1	0.039746	0	1.27801	0	0	3.78801	0.05375	0	0	2	0	0	2	0	46	0	0	146	19	45492027	45493406	+	363	MSTRG.101320	MSTRG.101320
MSTRG.101320.2	0.589287	0	0	0.608422	0	1.06251	3.47746	0	0	99	0	0	17	0	0	19	0	34	19	45492172	45493489	+	301	MSTRG.101320	MSTRG.101320
MSTRG.101321.1	1.1612	0	0	0	0	0	0	1.62326	0	0	42	0	31	0	0	0	0	0	19	45509232	45510691	+	277	MSTRG.101321	MSTRG.101321
MSTRG.101322.1	0	0	0	0	0	2.5265	0	0.766422	0	0	17	0	0	0	0	0	0	63	19	45509921	45511339	+	236	MSTRG.101322	MSTRG.101322
MSTRG.101323.1	0	0	0	0	1.68077	0	0	0	0	0	0	0	0	0	0	0	41	0	19	45512696	45513598	+	277	MSTRG.101323	MSTRG.101323
MSTRG.101324.1	0	0	0.29438	0	0	0.987416	0	0	1.71228	0	0	135	0	0	20	0	0	73	19	45522950	45524526	+	692	MSTRG.101324	MSTRG.101324
MSTRG.101325.1	0.717832	0	1.62656	0.421076	0.306824	1.0141	1.33974	0	0	41	0	0	22	0	52	14	9	35	19	45523763	45524968	+	320	MSTRG.101325	MSTRG.101325
MSTRG.101325.2	0.634744	0	1.17962	0	0.723909	0.403211	1.15326	0	0	31	0	0	17	0	33	0	18	12	19	45523806	45524968	+	277	MSTRG.101325	MSTRG.101325
MSTRG.101326.1	0	0	0	0	0	0	0	0	3.17699	0	0	105	0	0	0	0	0	0	19	45529286	45530633	+	289	MSTRG.101326	MSTRG.101326
MSTRG.101329.1	0.052363	0	0	0.350144	0	2.82258	0	0	0	0	0	0	6	0	0	41	0	346	19	45544444	45546670	-	1159	MSTRG.101329	MSTRG.101329
MSTRG.101329.2	0	0	0	1.44071	0	0.394458	0	0	0	0	0	0	0	0	0	46	0	14	19	45545288	45546670	-	315	MSTRG.101329	MSTRG.101329
MSTRG.101336.1	1.52187	0.474689	0	0	0	0	0	0	1.33841	0	0	111	105	34	0	0	0	0	19	45561337	45563796	-	731	MSTRG.101336	MSTRG.101336
MSTRG.101336.2	0	0	0	0	0.468019	0	0	0	1.23886	0	0	36	0	0	0	0	11	0	19	45562966	45563796	-	250	MSTRG.101336	MSTRG.101336
MSTRG.101343.1	0	0	0	0	0	0	2.19928	0	0	62	0	0	0	0	0	0	0	0	19	45590235	45591721	+	295	MSTRG.101343	MSTRG.101343
MSTRG.101375.1	0	0	0	0	1.83537	0	1.62695	0	0	34	0	0	0	0	0	0	35	0	19	45666269	45667735	+	217	MSTRG.101375	MSTRG.101375
MSTRG.101384.1	5.26206	0	0	1.15615	1.3497	0.813791	1.60967	0.812193	0	50	25	0	164	0	0	39	39	29	19	45720988	45722588	-	330	MSTRG.101384	MSTRG.101384
MSTRG.101384.2	0	0	0	0.194489	0	1.70151	2.92069	0.57095	0	90	18	0	0	0	0	7	0	59	19	45720992	45722588	-	326	MSTRG.101384	MSTRG.101384
MSTRG.101384.3	2.53736	0.366538	0	0.738549	1.67672	1.8757	0.257364	0	0	8	0	0	78	12	0	24	48	65	19	45720993	45722588	-	325	MSTRG.101384	MSTRG.101384
MSTRG.101385.1	1.30145	0.220031	0.196128	1.13225	0.179602	0	0.06718	1.166	1.91094	2	34	68	39	7	6	36	5	0	19	45722898	45724362	-	310	MSTRG.101385	MSTRG.101385
MSTRG.101386.1	2.26068	0	1.78661	0.555712	5.31249	1.46393	2.09689	2.53654	0	119	139	0	128	0	105	34	277	93	19	45723391	45725144	-	598	MSTRG.101386	MSTRG.101386
MSTRG.101389.1	0	0	0	0	0	0.066054	2.5496	0	0	69	0	0	0	0	0	0	0	2	19	45756728	45758125	+	284	MSTRG.101389	MSTRG.101389
MSTRG.101406.1	0	0	0	1.33675	0	0	0	0	0	0	0	0	0	0	0	37	0	0	19	45823090	45827348	+	277	MSTRG.101406	MSTRG.101406
MSTRG.101415.1	0	0	0	0	2.14359	0	0	0	0	0	0	0	0	0	0	0	43	0	19	45912855	45913978	-	230	MSTRG.101415	MSTRG.101415
MSTRG.101419.1	0.216332	0	0	0	3.60005	0.459653	0	0	0	0	0	0	8	0	0	0	113	18	19	45927061	45929547	+	357	MSTRG.101419	MSTRG.101419
MSTRG.101421.2	0	1.20271	0.760881	0.503441	0	0	0	0	1.99521	0	0	119	0	61	40	27	0	0	19	45943081	45943626	-	526	MSTRG.101421	MSTRG.101421
MSTRG.101423.10	0	0	0	0	0	0	0.57142	0	0	45	0	0	0	0	0	0	0	0	19	45991805	45993209	+	819	MSTRG.101423	MSTRG.101423
MSTRG.101423.11	0.004861	0	0	0.030791	0.036212	0	0.634014	0.133954	0.024751	131	27	7	1	0	0	7	7	0	19	45993719	45996996	+	2180	MSTRG.101423	MSTRG.101423
MSTRG.101423.4	0	0.819357	0.404482	0	1.84762	0	1.41672	0	0	31	0	0	0	19	10	0	38	0	19	45951973	45953419	+	231	MSTRG.101423	MSTRG.101423
MSTRG.101423.6	0	0	0	0.361935	0	1.66221	0	0	0.195843	0	0	14	0	0	0	23	0	109	19	45954370	45955777	+	616	MSTRG.101423	MSTRG.101423
MSTRG.101423.7	0	0	0	0.555106	0	0.632456	0	0	0	0	0	0	0	0	0	33	0	40	19	45954393	45955777	+	593	MSTRG.101423	MSTRG.101423
MSTRG.101423.8	0.235746	8.62894	0	2.47398	3.22927	0	3.55014	0	0.096129	225	0	8	15	559	0	166	190	0	19	45976168	45977993	+	672	MSTRG.101423	MSTRG.101423
MSTRG.101424.1	1.18058	2.386	0	0.436303	0.955527	0.684774	0.220541	1.23763	2.12746	11	56	117	54	112	0	22	41	36	19	45952230	45953928	+	485	MSTRG.101424	MSTRG.101424
MSTRG.101425.1	0	1.33372	1.58343	0	0	0	0	0	0	0	0	0	0	30	36	0	0	0	19	45952866	45954315	+	229	MSTRG.101425	MSTRG.101425
MSTRG.101426.1	0.193223	1.03804	0	0.599569	1.56376	0.043204	1.46054	0	1.02761	183	0	155	25	133	0	80	181	7	19	45962039	45964627	+	1325	MSTRG.101426	MSTRG.101426
MSTRG.101427.1	0.324942	2.07098	0	2.16297	0.766832	0	0.542042	0	2.42328	38	0	201	23	146	0	158	49	0	19	45963326	45965320	+	730	MSTRG.101427	MSTRG.101427
MSTRG.101428.1	0	0	0	0.564029	0.094221	0	0	0	6.44137	0	0	173	0	0	0	14	2	0	19	45967092	45968297	+	237	MSTRG.101428	MSTRG.101428
MSTRG.101429.1	0.656421	0.390057	0	1.57167	0	1.13577	2.23596	0	0.474974	92	0	24	28	17	0	69	0	53	19	45969616	45971254	+	437	MSTRG.101429	MSTRG.101429
MSTRG.101430.1	0	0	0	1.60098	0.222064	0	1.45225	0	0	47	0	0	0	0	0	55	7	0	19	45970089	45971623	+	343	MSTRG.101430	MSTRG.101430
MSTRG.101431.1	0	1.88457	0	0	0	0	3.47121	0	2.1686	96	0	73	0	54	0	0	0	0	19	45975748	45977193	+	293	MSTRG.101431	MSTRG.101431
MSTRG.101432.1	1.161	0.141123	0	0	0	4.16216	0	0	0	0	0	0	28	4	0	0	0	110	19	45982959	45984318	+	250	MSTRG.101432	MSTRG.101432
MSTRG.101433.6	0.181869	0.888785	0.569621	0.336452	0.889116	0	0	1.31426	0	0	105	0	15	75	49	30	68	0	19	46008862	46010663	+	870	MSTRG.101433	MSTRG.101433
MSTRG.101435.1	0.359428	1.46199	2.08237	0	1.06915	0	0	0	0	0	0	0	8	30	43	0	20	0	19	46021383	46022721	+	207	MSTRG.101435	MSTRG.101435
MSTRG.101437.1	1.33495	0	3.12356	5.41968	1.68242	1.35523	0.425252	0.434534	0	9	9	0	28	0	67	118	32	32	19	46028086	46031661	+	217	MSTRG.101437	MSTRG.101437
MSTRG.101438.1	0	0	0	0	0	3.10917	0	0	0	0	0	0	0	0	0	0	0	79	19	46030637	46033427	-	240	MSTRG.101438	MSTRG.101438
MSTRG.101440.1	0	0	0	2.05439	0	0	0	0	0	0	0	0	0	0	0	92	0	0	19	46057222	46058795	+	445	MSTRG.101440	MSTRG.101440
MSTRG.101442.1	0	2.76713	0	0	0	0	0	0	0	0	0	0	0	79	0	0	0	0	19	46071366	46072791	-	293	MSTRG.101442	MSTRG.101442
MSTRG.101443.1	0	0	0	0.395607	0	2.28559	0	0	0.223467	0	0	10	0	0	0	15	0	87	19	46071749	46073240	+	357	MSTRG.101443	MSTRG.101443
MSTRG.101443.2	0	0	0	0.798827	0	0.115918	0	0	0	0	0	0	0	0	0	29	0	5	19	46071752	46073240	+	354	MSTRG.101443	MSTRG.101443
MSTRG.101444.1	1.37714	0.749193	0.366559	0.334926	0.079858	1.07851	1.3556	0.289582	0.020902	116	24	3	118	66	33	31	7	103	19	46072185	46074223	+	904	MSTRG.101444	MSTRG.101444
MSTRG.101444.2	0.778075	0.013391	0	0	0	0.651543	0	0	0.766986	0	0	71	60	2	0	0	0	57	19	46072274	46074223	+	815	MSTRG.101444	MSTRG.101444
MSTRG.101445.1	0.958863	1.45007	0	0	0	2.17562	0.879716	0	0.346193	65	0	31	71	109	0	0	0	179	19	46074958	46076590	+	778	MSTRG.101445	MSTRG.101445
MSTRG.101446.1	0	0	0	3.43772	0	0	0	0	0	0	0	0	0	0	0	71	0	0	19	46075583	46076642	-	205	MSTRG.101446	MSTRG.101446
MSTRG.101447.3	3.1863	0.414548	1.86421	1.9077	4.38708	1.25469	1.35949	3.24751	1.62484	136	317	196	319	43	195	203	407	141	19	46120145	46121798	+	1062	MSTRG.101447	MSTRG.101447
MSTRG.101448.1	1.90375	1.48424	3.2259	2.03863	1.26396	1.62281	0.464797	2.32221	0.350935	53	255	48	215	172	380	244	132	206	19	46108584	46110696	+	1197	MSTRG.101448	MSTRG.101448
MSTRG.101448.2	4.17902	0	0	0	0	0	0.310569	0	0	21	0	0	277	0	0	0	0	0	19	46109082	46110696	+	702	MSTRG.101448	MSTRG.101448
MSTRG.101448.3	0.025041	0	0	0	0	0	0	0.559123	0	0	17	0	1	0	0	0	0	0	19	46109246	46110488	+	326	MSTRG.101448	MSTRG.101448
MSTRG.101448.4	1.31194	1.99398	1.40853	1.82073	1.82446	2.71523	0.473105	1.22914	1.40083	35	89	125	97	151	109	143	125	225	19	46109811	46111507	+	783	MSTRG.101448	MSTRG.101448
MSTRG.101448.5	2.28479	0.343313	0.803515	1.60926	0.031708	0	0	1.95425	1.62621	0	141	145	169	26	62	126	3	0	19	46109811	46111507	+	783	MSTRG.101448	MSTRG.101448
MSTRG.101448.6	2.61141	0.889226	0.792247	1.45988	0.676154	0.007339	0.86523	1.51928	0.224858	57	97	18	171	60	54	101	41	1	19	46109902	46111507	+	692	MSTRG.101448	MSTRG.101448
MSTRG.101449.1	2.20695	1.06359	0.817092	0.9414	0.232974	0.315324	1.71887	1.24777	0.365401	250	177	64	321	158	124	145	32	52	19	46130452	46133017	+	1541	MSTRG.101449	MSTRG.101449
MSTRG.101449.2	0.108495	0	0.209686	0.077117	0.274306	0.049011	0.432479	0.476475	0	34	36	0	9	0	17	7	20	5	19	46130655	46132490	+	811	MSTRG.101449	MSTRG.101449
MSTRG.101449.3	0	0	0	0	0	0.185149	0	0	0	0	0	0	0	0	0	0	0	15	19	46130700	46132490	+	747	MSTRG.101449	MSTRG.101449
MSTRG.101449.4	2.39895	2.57559	1.74638	0.868163	1.95932	0.510927	1.78289	0	0.64851	1147	0	503	1546	1697	1172	592	1168	369	19	46131237	46139097	+	6835	MSTRG.101449	MSTRG.101449
MSTRG.101455.1	13.8554	25.2554	21.4602	9.14318	18.2357	7.61459	8.00356	19.0953	0.611019	231	536	22	400	745	645	280	487	246	19	46180589	46181577	+	306	MSTRG.101455	MSTRG.101455
MSTRG.101460.1	0	1.39919	0	0	0	0	0	0	0	0	0	0	0	33	0	0	0	0	19	46203109	46204065	-	239	MSTRG.101460	MSTRG.101460
MSTRG.101460.2	0	2.59146	0.205927	0	0.514534	0	0	0	0	0	0	0	0	67	6	0	12	0	19	46203604	46204588	-	267	MSTRG.101460	MSTRG.101460
MSTRG.101460.3	0	0	0.471869	0	1.31006	0	0	0	0	0	0	0	0	0	17	0	40	0	19	46203621	46204686	-	348	MSTRG.101460	MSTRG.101460
MSTRG.101461.1	0.465374	0	0	0	0	0	3.25846	0	0	90	0	0	13	0	0	0	0	0	19	46203740	46204750	+	293	MSTRG.101461	MSTRG.101461
MSTRG.101464.1	0	3.96613	0	0	0	0	0.089008	0	0	3	0	0	0	100	0	0	0	0	19	46206576	46207771	+	261	MSTRG.101464	MSTRG.101464
MSTRG.101489.1	0	0	0	0	0	0	5.09969	0	0	133	0	0	0	0	0	0	0	0	19	46291232	46291537	-	276	MSTRG.101489	MSTRG.101489
MSTRG.101498.1	0	0	0	0.171891	0.585554	0	0	2.25389	0	0	57	0	0	0	0	5	14	0	19	46331973	46333470	-	274	MSTRG.101498	MSTRG.101498
MSTRG.101504.1	0	0	0	3.34187	0	0	0	0	0	0	0	0	0	0	0	77	0	0	19	46355513	46356442	-	230	MSTRG.101504	MSTRG.101504
MSTRG.101505.1	0	0	0	4.49464	0	0	0	0	0	0	0	0	0	0	0	112	0	0	19	46359146	46360486	-	248	MSTRG.101505	MSTRG.101505
MSTRG.101515.1	0	0	0	0	0	0	0	0	2.82254	0	0	78	0	0	0	0	0	0	19	46392174	46392464	-	243	MSTRG.101515	MSTRG.101515
MSTRG.101519.1	0	0	0.62405	0	0	0	0	2.686	0	0	51	0	0	0	13	0	0	0	19	46415588	46416382	-	205	MSTRG.101519	MSTRG.101519
MSTRG.101534.1	5.13027	6.49304	10.8098	5.63115	4.56797	9.51895	8.02749	10.6034	5.65774	1707	2195	1449	1093	1414	2398	1269	900	2270	19	46472352	46475623	-	2259	MSTRG.101534	MSTRG.101534
MSTRG.101534.2	1.00974	0.218473	0.221527	0	0	0	0.986422	1.48908	0.085958	45	66	5	46	11	11	0	0	0	19	46474126	46475623	-	483	MSTRG.101534	MSTRG.101534
MSTRG.101534.3	0.563497	0.048348	0.037832	0	0	0	0	0.102668	0	0	5	0	26	3	2	0	0	0	19	46474126	46475623	-	483	MSTRG.101534	MSTRG.101534
MSTRG.101535.1	1.18346	0	2.12913	0	0	0	0	2.32824	0	0	56	0	29	0	55	0	0	0	19	46477679	46479071	-	259	MSTRG.101535	MSTRG.101535
MSTRG.101545.1	2.48434	0.208033	0.921793	0.890711	1.40379	1.60044	1.00178	3.62111	0.931797	158	553	176	391	34	151	149	204	282	19	46517403	46520308	-	1666	MSTRG.101545	MSTRG.101545
MSTRG.101546.1	1.7566	0	0	0.867705	0	0.628947	3.1656	0	0	169	0	0	94	0	0	49	0	38	19	46521186	46521789	-	566	MSTRG.101546	MSTRG.101546
MSTRG.101547.1	0	0	0	0	0	1.3124	0	0	0	0	0	0	0	0	0	0	0	42	19	46526262	46527677	+	302	MSTRG.101547	MSTRG.101547
MSTRG.101554.1	0.241044	0	0	1.27517	0	0	0	0	0	0	0	0	7	0	0	34	0	0	19	46537178	46538632	-	267	MSTRG.101554	MSTRG.101554
MSTRG.101555.1	2.50619	0	0.566621	0	0	0	0	4.17999	0	0	115	0	71	0	17	0	0	0	19	46537472	46538965	-	298	MSTRG.101555	MSTRG.101555
MSTRG.101556.1	1.80445	0	0	0	0	0	0	0	0	0	0	0	55	0	0	0	0	0	19	46537905	46539420	-	321	MSTRG.101556	MSTRG.101556
MSTRG.101558.1	0	0	0	1.51047	0	0	1.22107	0	0.097191	53	0	5	0	0	0	69	0	0	19	46540915	46543310	-	454	MSTRG.101558	MSTRG.101558
MSTRG.10156.10	0	0.188679	1.08607	0	0	0.263561	0	0.008701	0.181688	0	2	29	0	25	147	0	0	39	1	120964734	120968590	+	1371	MSTRG.10156	MSTRG.10156
MSTRG.10156.11	0.063893	2.37139	0.818175	1.02384	0.808259	0.168826	1.07173	0.177542	0.713563	56	9	45	4	127	45	57	39	10	1	120965040	120968081	+	553	MSTRG.10156	MSTRG.10156
MSTRG.10156.12	0.040822	0.13564	0.440875	2.0779	0.685989	1.89315	0.774395	0	0.413381	98	0	63	6	18	59	279	81	269	1	120965339	120969158	+	1344	MSTRG.10156	MSTRG.10156
MSTRG.10156.13	0	0.202237	0.374676	1.70502	1.13974	1.03492	0	0	0	0	0	0	0	11	21	93	55	60	1	120965339	120968372	+	544	MSTRG.10156	MSTRG.10156
MSTRG.10156.14	2.1501	0.382818	0	0.534324	0	0	0	0	0	0	0	0	269	49	0	71	0	0	1	120965358	120969158	+	1324	MSTRG.10156	MSTRG.10156
MSTRG.10156.15	0	0	0	0	0.427728	0	4.27165	0	0	298	0	0	0	0	0	0	28	0	1	120965370	120968590	+	741	MSTRG.10156	MSTRG.10156
MSTRG.10156.16	0.987235	2.4835	1.92266	1.13747	0.88843	1.61611	2.24077	2.45932	3.60337	319	341	618	141	362	286	172	118	258	1	120966109	120970973	+	1512	MSTRG.10156	MSTRG.10156
MSTRG.10156.17	0.245372	0.922154	0.263479	0	0.886488	0	0.613756	0	1.25397	31	0	76	13	48	14	0	42	0	1	120969567	120970973	+	534	MSTRG.10156	MSTRG.10156
MSTRG.10156.18	0.848699	0	0	1.12504	1.99413	0	2.0167	0	0	80	0	0	34	0	0	48	73	0	1	120970251	120971536	+	419	MSTRG.10156	MSTRG.10156
MSTRG.10156.19	0.852977	0	0	0.108034	0.280766	0	1.74407	0	0	41	0	0	20	0	0	3	7	0	1	120970424	120971536	+	246	MSTRG.10156	MSTRG.10156
MSTRG.10156.8	0.090318	0	0	0	0	0	1.02766	0	0	39	0	0	4	0	0	0	0	0	1	120963524	120968590	+	402	MSTRG.10156	MSTRG.10156
MSTRG.10156.9	3.32705	5.2521	0.541601	1.47706	4.85796	5.89997	1.96987	0.933723	2.3131	76	35	107	128	207	22	61	173	255	1	120964078	120966666	+	408	MSTRG.10156	MSTRG.10156
MSTRG.101565.1	0	0	0	0	0.676046	2.79354	0	1.18737	0	0	37	0	0	0	0	0	20	100	19	46559818	46561443	-	338	MSTRG.101565	MSTRG.101565
MSTRG.10157.1	0	0.460256	0.171357	0	0	0	2.44453	0	0	73	0	0	0	14	6	0	0	0	1	120957792	120962001	+	314	MSTRG.10157	MSTRG.10157
MSTRG.101575.1	0.137625	0	0	0	0	0	0	2.19433	0	0	53	0	4	0	0	0	0	0	19	46585595	46587747	-	259	MSTRG.101575	MSTRG.101575
MSTRG.101576.1	2.83397	0	0	0.942707	1.58198	0.265141	3.56348	0	0	90	0	0	72	0	0	26	37	8	19	46585867	46588028	-	268	MSTRG.101576	MSTRG.101576
MSTRG.10158.1	0.036856	3.56608	0.017215	0.114858	0.420673	0	0.492835	0	0	14	0	0	1	98	1	4	11	0	1	120970037	120971187	+	284	MSTRG.10158	MSTRG.10158
MSTRG.10159.1	0	0	0	0.754739	0	2.53378	1.06229	0	0	25	0	0	0	0	0	19	0	67	1	120970284	120971398	-	248	MSTRG.10159	MSTRG.10159
MSTRG.101602.1	0	0	0	1.90335	0	0	0	0	0	0	0	0	0	0	0	59	0	0	19	46636260	46637510	-	308	MSTRG.101602	MSTRG.101602
MSTRG.101611.1	0	0	0	1.72082	0	0	0	0	0	0	0	0	0	0	0	45	0	0	19	46651934	46653907	+	260	MSTRG.101611	MSTRG.101611
MSTRG.101612.1	1.94054	0	0.817727	0.365904	0.14111	0	0.315328	1.35644	1.10881	15	62	62	90	0	40	18	7	0	19	46653022	46654489	-	491	MSTRG.101612	MSTRG.101612
MSTRG.101612.2	0.124095	0	2.3272	0	0.206821	0	0	1.17936	1.64931	0	37	63	4	0	77	0	7	0	19	46653178	46654489	-	335	MSTRG.101612	MSTRG.101612
MSTRG.101615.1	1.03774	0	0.565124	0.587561	1.47765	0	2.33213	5.19777	0.697583	121	263	44	54	0	31	33	71	0	19	46656699	46657820	-	551	MSTRG.101615	MSTRG.101615
MSTRG.101617.1	1.35965	0	0	0	1.76843	0	1.44399	1.99716	1.14427	127	171	121	120	0	0	0	144	0	19	46658425	46664858	-	930	MSTRG.101617	MSTRG.101617
MSTRG.10162.1	3.46873	0.82365	1.66065	1.62252	0.912244	1.62599	1.34056	0	0.459268	157	0	65	405	99	202	201	99	213	1	120974962	120977144	+	1237	MSTRG.10162	MSTRG.10162
MSTRG.101623.4	0.679099	0	0.522803	0	0	0	1.59146	0	2.34365	57	0	101	25	0	20	0	0	0	19	46671968	46673454	+	377	MSTRG.101623	MSTRG.101623
MSTRG.101624.1	2.05688	0	0	0	0	0	1.08691	1.42015	0	83	106	0	158	0	0	0	0	0	19	46667395	46669072	+	810	MSTRG.101624	MSTRG.101624
MSTRG.101624.2	0.633107	0	0	0	0	0	0	0.717611	0	0	24	0	22	0	0	0	0	0	19	46667847	46669072	+	353	MSTRG.101624	MSTRG.101624
MSTRG.101626.1	0	0	0.716952	0	0	0	0	0	0	0	0	0	0	0	16	0	0	0	19	46671965	46673295	-	221	MSTRG.101626	MSTRG.101626
MSTRG.101635.5	2.48663	0	0	0.136334	0	0	0	0	0.842477	0	0	32	78	0	0	5	0	0	19	46723665	46724925	+	329	MSTRG.101635	MSTRG.101635
MSTRG.101636.1	1.26638	2.66671	1.98112	1.29728	2.0489	1.71344	2.85601	0	1.72418	285	0	207	127	273	206	138	190	192	19	46719104	46721250	+	1059	MSTRG.101636	MSTRG.101636
MSTRG.101637.1	0	0	0	0	0	0	0.201361	0	0.333437	7	0	13	0	0	0	0	0	0	19	46719666	46721091	-	338	MSTRG.101637	MSTRG.101637
MSTRG.101638.1	2.35922	0	0	0	0	0	0.997106	0	0.109301	28	0	4	66	0	0	0	0	0	19	46720230	46721627	-	296	MSTRG.101638	MSTRG.101638
MSTRG.101639.1	0	0	0	0	0	0	1.0328	0	1.25977	45	0	66	0	0	0	0	0	0	19	46723553	46724938	-	458	MSTRG.101639	MSTRG.101639
MSTRG.101641.1	0	0	0.99675	0	0	1.60514	0	0	2.06474	0	0	77	0	0	32	0	0	56	19	46735318	46736332	-	327	MSTRG.101641	MSTRG.101641
MSTRG.101642.1	1.92508	0	0.904524	0.418578	1.16565	0.305923	0.741812	0	1.07594	28	0	49	72	0	36	17	41	13	19	46748568	46749812	-	396	MSTRG.101642	MSTRG.101642
MSTRG.101642.2	1.69566	2.39866	0.376855	0.993676	0.988844	0	1.23011	2.01787	0	77	123	0	106	154	25	66	58	0	19	46749373	46750885	-	662	MSTRG.101642	MSTRG.101642
MSTRG.101644.1	1.97539	0	0	0	0	0	1.63086	0	0	92	0	0	111	0	0	0	0	0	19	46788336	46790054	-	594	MSTRG.101644	MSTRG.101644
MSTRG.101645.1	1.39801	0.669456	0.596573	0.198833	0.966105	0	0	1.88682	0	0	104	0	79	39	35	12	51	0	19	46797171	46799010	-	597	MSTRG.101645	MSTRG.101645
MSTRG.101646.1	0	0	0	0.382933	0	1.71219	0	0	0	0	0	0	0	0	0	16	0	73	19	46797862	46799502	-	399	MSTRG.101646	MSTRG.101646
MSTRG.101646.2	0	0	0	0	0	0	0	5.68844	2.0435	0	208	93	0	0	0	0	0	0	19	46797863	46799502	-	398	MSTRG.101646	MSTRG.101646
MSTRG.101647.1	0.638953	0	1.71944	0	1.5746	0	0	0.752665	1.3588	0	37	81	32	0	89	0	72	0	19	46798357	46800120	-	522	MSTRG.101647	MSTRG.101647
MSTRG.101648.2	0.614957	0.072359	1.27429	0.037688	0	0	0	0	0	0	0	0	14	2	29	1	0	0	19	46830423	46831472	-	227	MSTRG.101648	MSTRG.101648
MSTRG.10165.1	1.78442	0	0	0.630548	0.427748	0	2.05658	0	0	71	0	0	62	0	0	23	14	0	1	120981740	120983154	+	364	MSTRG.10165	MSTRG.10165
MSTRG.101650.1	0	0	1.15019	0	0.145523	1.23136	0.734448	0	0	22	0	0	0	0	35	0	4	41	19	46841554	46842279	-	309	MSTRG.101650	MSTRG.101650
MSTRG.101650.2	0	0	0	0.074076	0.683371	0	1.70746	0	0	111	0	0	0	0	0	6	41	0	19	46841569	46842669	-	688	MSTRG.101650	MSTRG.101650
MSTRG.101650.3	0	0	0	0	0	0	0.573937	0	0	38	0	0	0	0	0	0	0	0	19	46841569	46842669	-	688	MSTRG.101650	MSTRG.101650
MSTRG.101650.4	0.672663	0	0	2.15555	0.399176	0	0	0	0	0	0	0	26	0	0	88	15	0	19	46841852	46842669	-	405	MSTRG.101650	MSTRG.101650
MSTRG.101651.1	0.250541	0.923051	1.68345	1.27873	1.43035	0	1.94561	2.6628	0.310559	63	84	13	9	31	57	44	43	0	19	46852103	46853580	-	341	MSTRG.101651	MSTRG.101651
MSTRG.101652.1	0.597764	1.62819	0	0	2.34084	0	0.17552	0	0.784656	7	0	33	21	58	0	0	76	0	19	46852474	46853978	-	368	MSTRG.101652	MSTRG.101652
MSTRG.101652.2	1.50555	0	0	0	0.643202	0	1.41334	0	0	50	0	0	54	0	0	0	21	0	19	46852474	46853978	-	374	MSTRG.101652	MSTRG.101652
MSTRG.101653.1	0.807509	0	0	0.021479	1.30829	2.08735	3.01556	0.668435	0	151	33	0	41	0	0	2	61	117	19	46852940	46854600	-	529	MSTRG.101653	MSTRG.101653
MSTRG.101654.1	1.34013	0.338922	0.603495	0.603636	1.38641	0	0	1.36575	0	0	80	0	81	21	38	39	77	0	19	46859121	46860918	-	635	MSTRG.101654	MSTRG.101654
MSTRG.101654.2	0.958985	0.287034	1.00098	0.692726	1.1054	0	0	2.56549	0.460197	0	178	40	69	21	75	53	73	0	19	46859122	46861037	-	753	MSTRG.101654	MSTRG.101654
MSTRG.101655.1	1.90372	0	2.24321	1.77709	0	0	0	4.32409	0	0	102	0	46	0	57	46	0	0	19	46860023	46861440	-	255	MSTRG.101655	MSTRG.101655
MSTRG.101656.1	0	0	0.719551	0	0	0.486456	2.32646	0	0	60	0	0	0	0	20	0	0	15	19	46864260	46865663	-	273	MSTRG.101656	MSTRG.101656
MSTRG.101656.2	0	0	0.55642	0	1.23887	0	0.613097	0	2.28508	38	0	167	0	0	36	0	70	0	19	46864279	46866050	-	644	MSTRG.101656	MSTRG.101656
MSTRG.101656.3	0.307748	0	0	0.187644	1.07366	0.076674	0	0	0.095785	0	0	6	16	0	0	11	51	5	19	46864388	46866050	-	535	MSTRG.101656	MSTRG.101656
MSTRG.101657.1	1.18217	1.52089	1.71038	1.55078	2.94414	0.616214	0.829929	2.73629	0.248811	95	303	34	135	177	203	187	310	79	19	46869268	46871262	-	1205	MSTRG.101657	MSTRG.101657
MSTRG.101658.1	0.920798	0.681808	1.22921	0.350502	2.93511	0.397874	0	0.835234	3.20774	0	59	277	67	51	92	27	195	32	19	46871896	46875175	-	762	MSTRG.101658	MSTRG.101658
MSTRG.101658.2	0	1.07619	0	0.20949	4.79199	0	0	1.07987	0.995443	0	40	46	0	42	0	9	168	0	19	46872256	46875175	-	402	MSTRG.101658	MSTRG.101658
MSTRG.101659.1	0.068887	2.22897	0	2.6136	0	0	0	1.64035	0.254435	0	47	9	3	67	0	81	0	0	19	46880710	46882863	-	308	MSTRG.101659	MSTRG.101659
MSTRG.10166.1	0.369526	0	0	0	0	0	4.97912	0	0	136	0	0	11	0	0	0	0	0	1	120983625	120984438	+	289	MSTRG.10166	MSTRG.10166
MSTRG.101660.1	1.22073	2.90199	0	2.12756	0.215926	0	0	0	2.69051	0	0	73	28	67	0	51	5	0	19	46881157	46883235	-	238	MSTRG.101660	MSTRG.101660
MSTRG.101661.1	1.06931	0.347356	0.198077	0.257282	0.128473	0.323827	0.032323	0.834635	1.61877	4	85	203	112	37	22	29	13	38	19	46888824	46891072	-	1103	MSTRG.101661	MSTRG.101661
MSTRG.101661.2	2.10845	0.597875	0.038472	0.456099	0.39286	0.534637	0.597669	0	1.49583	56	0	167	196	57	4	45	34	56	19	46888946	46891072	-	984	MSTRG.101661	MSTRG.101661
MSTRG.101662.1	0.104146	0	0.155287	0	0.3911	0	0	0.216233	0	0	49	0	25	0	38	0	84	0	19	46893638	46896484	+	2461	MSTRG.101662	MSTRG.101662
MSTRG.101663.1	1.57975	0.249797	0	0	0.863153	0	1.51905	0	0.960225	110	0	84	115	19	0	0	58	0	19	46908371	46910362	-	768	MSTRG.101663	MSTRG.101663
MSTRG.101663.2	1.14002	0.308778	0	1.37037	1.95971	0	0.240195	0	0.596564	8	0	23	36	10	0	46	58	0	19	46908809	46910362	-	334	MSTRG.101663	MSTRG.101663
MSTRG.101671.1	0	0	0	0	1.05109	0.59922	0	0	0	0	0	0	0	0	0	0	31	21	19	46942950	46944199	+	331	MSTRG.101671	MSTRG.101671
MSTRG.101672.3	0	0	0.132992	0	0	0	0.173156	0	0.077748	13	0	7	0	0	11	0	0	0	19	46943482	46945194	-	794	MSTRG.101672	MSTRG.101672
MSTRG.101675.1	0	0	0	1.6041	0	0	0	0	0	0	0	0	0	0	0	49	0	0	19	46969621	46971114	-	301	MSTRG.101675	MSTRG.101675
MSTRG.101676.1	1.18726	0.577564	0	0	0	0.460146	1.7917	0	0	40	0	0	27	14	0	0	0	12	19	46993709	46996298	-	235	MSTRG.101676	MSTRG.101676
MSTRG.101677.1	0	2.53978	0	0	0	0	0.147289	0	0	4	0	0	0	56	0	0	0	0	19	47023332	47024761	-	227	MSTRG.101677	MSTRG.101677
MSTRG.101678.1	0.131161	0	0	0	0	1.07376	2.54946	0	0	53	0	0	3	0	0	0	0	25	19	47030081	47031414	-	220	MSTRG.101678	MSTRG.101678
MSTRG.101679.1	0	0	0	1.23214	0	0	0	0	0	0	0	0	0	0	0	40	0	0	19	47034854	47036293	-	323	MSTRG.101679	MSTRG.101679
MSTRG.101679.2	0	0	0	0.085447	0	1.38958	0	0	0	0	0	0	0	0	0	2	0	30	19	47034974	47036293	-	203	MSTRG.101679	MSTRG.101679
MSTRG.101680.1	0.549559	0	0	0	0	1.91056	0.351361	0	0	15	0	0	23	0	0	0	0	87	19	47038227	47039877	-	427	MSTRG.101680	MSTRG.101680
MSTRG.101681.1	0	0	0	0	0	0	0	0	1.99117	0	0	58	0	0	0	0	0	0	19	47038977	47040457	-	257	MSTRG.101681	MSTRG.101681
MSTRG.101682.1	0	3.17235	0.415392	0	0	0	0	0	0	0	0	0	0	82	11	0	0	0	19	47058400	47059809	-	267	MSTRG.101682	MSTRG.101682
MSTRG.101683.1	2.48111	0	1.45138	0	0.550403	0	0	18.0444	0	0	487	0	69	0	42	0	15	0	19	47065784	47066119	-	294	MSTRG.101683	MSTRG.101683
MSTRG.101685.1	4.66818	0	0	0	1.21808	2.10516	4.33345	1.60212	0	205	74	0	221	0	0	0	54	112	19	47105763	47107496	-	501	MSTRG.101685	MSTRG.101685
MSTRG.101685.2	0.566005	0	1.73265	2.19401	0	0	0.935304	0	0	33	0	0	20	0	63	81	0	0	19	47105938	47107538	-	368	MSTRG.101685	MSTRG.101685
MSTRG.101686.1	0.146546	0	0	0	0	0	1.84174	0	0	45	0	0	4	0	0	0	0	0	19	47140215	47141676	-	259	MSTRG.101686	MSTRG.101686
MSTRG.10169.1	1.00652	0	0	0	0	0.734035	0	0.566829	0	0	24	0	43	0	0	0	0	35	1	120992710	120994350	+	449	MSTRG.10169	MSTRG.10169
MSTRG.101699.1	0.872836	0.078114	1.22406	0	0.062529	0	0	5.1e-05	1.7786	0	1	76	32	3	46	0	3	0	19	47270827	47272331	-	377	MSTRG.101699	MSTRG.101699
MSTRG.101699.2	1.50969	2.86977	0	0.755337	1.82396	0	2.75971	3.3195	0.097966	140	164	6	77	149	0	41	86	0	19	47270954	47272615	-	538	MSTRG.101699	MSTRG.101699
MSTRG.101704.4	0	0.627575	0	0	0.269541	0	0	0.882774	1.39365	0	25	49	0	19	0	0	8	0	19	47542345	47543728	+	304	MSTRG.101704	MSTRG.101704
MSTRG.101705.1	0.206731	5.11918	0	0	0	0	0	0	0	0	0	0	5	116	0	0	0	0	19	47499552	47500684	+	234	MSTRG.101705	MSTRG.101705
MSTRG.101706.1	0.565791	0	2.03711	0	0	0	0	0	0	0	0	0	14	0	50	0	0	0	19	47508616	47509967	+	248	MSTRG.101706	MSTRG.101706
MSTRG.101707.1	0	0	0	0	0	2.77915	0	0	0	0	0	0	0	0	0	0	0	60	19	47518869	47520055	+	202	MSTRG.101707	MSTRG.101707
MSTRG.101713.1	0.124659	1.00502	1.16072	1.51042	0.752676	0	2.09941	0	0	173	0	0	11	85	100	132	58	0	19	47584519	47586513	-	875	MSTRG.101713	MSTRG.101713
MSTRG.101719.1	0.205686	0.869418	0	0	0	0	0	0	2.17195	0	0	57	5	20	0	0	0	0	19	47592733	47593913	-	229	MSTRG.101719	MSTRG.101719
MSTRG.101720.1	0	0	1.9013	0	0	0	0	0	0	0	0	0	0	0	53	0	0	0	19	47593108	47594340	-	280	MSTRG.101720	MSTRG.101720
MSTRG.101723.1	1.95319	0.701598	0	0.322824	0.869773	0.990138	0	2.09643	0.054501	0	144	5	138	51	0	25	57	79	19	47596864	47598544	-	747	MSTRG.101723	MSTRG.101723
MSTRG.101724.1	2.90862	0	0	1.39727	0.764931	0	0.975886	0	0	36	0	0	106	0	0	54	26	0	19	47600996	47603392	-	383	MSTRG.101724	MSTRG.101724
MSTRG.101724.2	0.032576	0	0.788081	0.02422	1.29174	0	1.54246	0	0	50	0	0	2	0	27	1	39	0	19	47601039	47603392	-	340	MSTRG.101724	MSTRG.101724
MSTRG.101725.1	2.08436	0	0.64973	1.33043	2.52081	1.04983	1.0424	1.6202	0	38	57	0	75	0	25	51	84	43	19	47601447	47603840	-	380	MSTRG.101725	MSTRG.101725
MSTRG.101726.1	0.017681	4.9028	0.607974	0.673037	0	0	0.487204	0	0	16	0	0	1	163	21	24	0	0	19	47601939	47604295	-	344	MSTRG.101726	MSTRG.101726
MSTRG.10173.1	0.694808	0	0	0	0	0	2.67016	0	0	189	0	0	50	0	0	0	0	0	1	120999767	121001305	+	751	MSTRG.10173	MSTRG.10173
MSTRG.10173.2	0	0	0	0	0	0	2.06606	1.28028	0	147	89	0	0	0	0	0	0	0	1	120999767	121001305	+	751	MSTRG.10173	MSTRG.10173
MSTRG.101737.1	1.18226	0	0.935442	0.902138	1.64233	0.870225	0	0	0.586816	0	0	338	567	0	467	458	728	467	19	47638030	47644316	-	5080	MSTRG.101737	MSTRG.101737
MSTRG.101737.2	0	0	0	0.370575	0	0	0	0	0	0	0	0	0	0	0	33	0	0	19	47640178	47641187	-	887	MSTRG.101737	MSTRG.101737
MSTRG.101756.1	2.26316	0	0	0	0	0	0	0	0	0	0	0	44	0	0	0	0	0	19	47709093	47763608	+	206	MSTRG.101756	MSTRG.101756
MSTRG.101772.12	1.41138	0.728234	3.15471	1.28813	1.35719	1.30543	0	1.33998	0	0	231	0	250	132	581	241	222	259	19	47987046	47989426	+	1875	MSTRG.101772	MSTRG.101772
MSTRG.101772.13	0.839461	0	0	0	3.88979	0	0	1.30964	0	0	47	0	31	0	0	0	133	0	19	47989049	47989946	+	391	MSTRG.101772	MSTRG.101772
MSTRG.101772.7	0.047873	0	0.745735	0	2.31196	0.583848	1.03673	0.012759	0.683483	84	1	67	4	0	63	0	172	53	19	47933343	47935248	+	853	MSTRG.101772	MSTRG.101772
MSTRG.101772.8	0.907206	0	0	0.883004	0.46044	0	0	0.453783	0	0	35	0	71	0	0	73	34	0	19	47933376	47935248	+	827	MSTRG.101772	MSTRG.101772
MSTRG.101772.9	0.003692	0	0	0	0	0	0	1.0894	0	0	51	0	1	0	0	0	0	0	19	47933697	47935248	+	507	MSTRG.101772	MSTRG.101772
MSTRG.101773.1	0.960703	0	1.50002	0	0	1.48604	1.45634	1.36061	3.01528	98	89	242	65	0	105	0	0	112	19	47777018	47778906	+	708	MSTRG.101773	MSTRG.101773
MSTRG.101774.1	0.234456	0	0.140932	0.428768	0.687542	0.161839	1.2101	2.51343	0	121	245	0	24	0	15	46	64	19	19	47785048	47787198	+	1060	MSTRG.101774	MSTRG.101774
MSTRG.101775.1	0	0	0	0	0.704964	2.37665	0.654298	0	0	27	0	0	0	0	0	0	27	110	19	47786657	47788182	+	435	MSTRG.101775	MSTRG.101775
MSTRG.101776.1	0.740829	0	3.7455	0.043976	1.77172	0	2.26768	0	0	98	0	0	33	0	169	3	71	0	19	47800791	47801273	+	459	MSTRG.101776	MSTRG.101776
MSTRG.101779.1	0.973123	2.01448	0	0	0.373528	0	0.348653	0.15624	0	12	5	0	32	68	0	0	12	0	19	47820007	47821264	+	346	MSTRG.101779	MSTRG.101779
MSTRG.101779.2	0.086467	0.310573	0	0	0	0	1.47531	0	1.52538	42	0	53	3	10	0	0	0	0	19	47820204	47821417	+	302	MSTRG.101779	MSTRG.101779
MSTRG.101781.1	0	0	0	0	0	0	5.5616	0	0	116	0	0	0	0	0	0	0	0	19	47842735	47844186	+	220	MSTRG.101781	MSTRG.101781
MSTRG.101783.1	0	0	0	0	0	0.715278	0	0	2.25298	0	0	77	0	0	0	0	0	23	19	47847198	47850346	+	299	MSTRG.101783	MSTRG.101783
MSTRG.101784.1	0.775666	0	0.14304	0	0	0	1.16551	0	0	68	0	0	46	0	9	0	0	0	19	47854989	47856827	+	616	MSTRG.101784	MSTRG.101784
MSTRG.101784.2	0	0	1.5827	0	0	0	1.19202	0	0	64	0	0	0	0	88	0	0	0	19	47855039	47856827	+	566	MSTRG.101784	MSTRG.101784
MSTRG.101786.1	0	0	0	0	1.9497	0	0	0	0	0	0	0	0	0	0	0	38	0	19	47912591	47913331	+	221	MSTRG.101786	MSTRG.101786
MSTRG.101786.2	0	0	0	0	1.02862	0	0	0	0	0	0	0	0	0	0	0	20	0	19	47912591	47913331	+	221	MSTRG.101786	MSTRG.101786
MSTRG.101787.1	2.10212	0	0	0	0	0	0	0	0.751331	0	0	40	92	0	0	0	0	0	19	47921466	47922753	+	462	MSTRG.101787	MSTRG.101787
MSTRG.101788.1	0.605435	0	0.4981	2.41763	0	0.560558	1.02601	0.086213	0	30	3	0	18	0	16	75	0	19	19	47937061	47938173	+	310	MSTRG.101788	MSTRG.101788
MSTRG.101788.2	2.5988	2.32879	2.33116	0.979262	1.45938	2.93934	1.23038	2.69847	0.641919	182	389	115	385	353	360	154	200	488	19	47937182	47939554	+	1570	MSTRG.101788	MSTRG.101788
MSTRG.101789.1	2.21551	1.36634	1.93168	2.26517	1.47744	1.25862	1.40748	1.31429	0.894484	199	181	153	314	198	285	340	194	200	19	47972447	47974412	+	1502	MSTRG.101789	MSTRG.101789
MSTRG.101793.1	1.15095	1.24509	0.345188	0	0.143294	0	0	1.31826	0	0	59	0	53	59	17	0	7	0	19	48011999	48013186	-	485	MSTRG.101793	MSTRG.101793
MSTRG.101794.1	2.12342	1.06944	0.837278	3.47519	0.454259	2.53866	2.31557	3.57439	0.454034	124	186	30	114	59	47	197	23	152	19	48012007	48013275	+	566	MSTRG.101794	MSTRG.101794
MSTRG.101794.2	0.509885	0.831673	1.12935	0.499184	1.57105	0	1.8651	2.53976	0	98	130	0	27	45	62	28	77	0	19	48012619	48013903	+	556	MSTRG.101794	MSTRG.101794
MSTRG.101794.3	0.338345	0	2.52969	0	4.74442	0	0	1.48591	0	0	33	0	8	0	60	0	100	0	19	48012960	48013903	+	240	MSTRG.101794	MSTRG.101794
MSTRG.101794.4	0	0	0.860578	0.403002	1.95381	0	0	2.21361	0.55172	0	113	35	0	0	47	23	95	0	19	48013322	48013903	+	556	MSTRG.101794	MSTRG.101794
MSTRG.101795.1	0	2.68268	0.2373	1.1075	2.00052	1.32306	1.7943	3.46267	0	326	612	0	0	499	45	213	337	270	19	48019689	48022372	+	1928	MSTRG.101795	MSTRG.101795
MSTRG.101795.2	5.32454	0.37865	0.127756	0.535147	1.04599	1.28027	0.668598	0.112319	0.461464	122	20	101	970	71	25	104	177	261	19	48019689	48022372	+	1931	MSTRG.101795	MSTRG.101795
MSTRG.101795.3	0	0	3.76122	0	0.011888	0	0	0	0	0	0	0	0	0	589	0	2	0	19	48020019	48022372	+	1593	MSTRG.101795	MSTRG.101795
MSTRG.101796.1	2.42648	0.51953	0.086902	1.76542	0.65192	1.21226	1.01466	2.26688	0.091833	143	311	16	342	75	13	264	85	192	19	48026200	48028793	+	1494	MSTRG.101796	MSTRG.101796
MSTRG.101797.1	1.68477	0.649797	1.31265	1.90267	1.99217	2.70336	0	0.92604	1.07356	0	51	73	95	38	77	113	104	170	19	48032978	48035846	+	595	MSTRG.101797	MSTRG.101797
MSTRG.101798.1	0	2.00486	0	0	0	0	0	0	0.708408	0	0	24	0	57	0	0	0	0	19	48033042	48034472	-	290	MSTRG.101798	MSTRG.101798
MSTRG.101799.1	1.51321	0	2.3138	2.80188	0	0	4.7273	0	0.408293	125	0	13	40	0	64	79	0	0	19	48034802	48036214	+	280	MSTRG.101799	MSTRG.101799
MSTRG.1018.1	0	0	0	2.37398	0.635509	0	0	0	3.54541	0	0	151	0	0	0	89	21	0	1	18001883	18003237	+	374	MSTRG.1018	MSTRG.1018
MSTRG.101804.1	0	0	0	0	0	0	0	0	1.68656	0	0	39	0	0	0	0	0	0	19	48057697	48058702	-	204	MSTRG.101804	MSTRG.101804
MSTRG.101828.3	0	0	0	0	0	0.120358	0	0	0	0	0	0	0	0	0	0	0	37	19	48124058	48127378	-	2868	MSTRG.101828	MSTRG.101828
MSTRG.101830.1	0	0	0	2.94085	0	0	0	0	0	0	0	0	0	0	0	81	0	0	19	48184171	48185426	-	276	MSTRG.101830	MSTRG.101830
MSTRG.101831.1	0.748963	0.620152	2.51406	0.145578	1.29466	0	0.602506	0	1.66816	56	0	185	69	59	242	15	111	0	19	48204128	48206209	-	977	MSTRG.101831	MSTRG.101831
MSTRG.101832.1	0.327573	0	0.104174	0.841023	1.85532	0	1.68576	0	0	125	0	0	25	0	8	66	127	0	19	48205252	48207138	-	782	MSTRG.101832	MSTRG.101832
MSTRG.101833.1	0.981824	0.839679	1.26672	0.261716	1.08079	0	2.70173	0	0.476527	200	0	43	73	64	98	21	74	0	19	48214085	48215422	-	783	MSTRG.101833	MSTRG.101833
MSTRG.101833.2	2.88501	0	0	2.42986	6.12847	0	2.11953	7.87157	0	87	314	0	119	0	0	106	232	0	19	48215103	48216088	-	434	MSTRG.101833	MSTRG.101833
MSTRG.101834.1	0.497628	2.07908	4.74293	0.451227	3.20045	0.091606	0.617545	1.90301	2.37836	39	118	181	32	135	313	31	188	7	19	48216294	48217913	-	671	MSTRG.101834	MSTRG.101834
MSTRG.101834.2	0.155582	2.00385	0	0	0.02147	3.86545	4.09871	0.145599	0.116648	257	9	9	10	129	0	0	2	271	19	48216301	48217913	-	664	MSTRG.101834	MSTRG.101834
MSTRG.101835.1	0.549084	0	0	0	2.11537	0	0	0	0	0	0	0	14	0	0	0	47	0	19	48224890	48225760	-	254	MSTRG.101835	MSTRG.101835
MSTRG.101836.1	2.29373	0	1.39917	0.943663	1.29237	0.914548	1.00583	0	1.24439	85	0	126	194	0	123	85	101	87	19	48227992	48229372	-	893	MSTRG.101836	MSTRG.101836
MSTRG.101837.1	0.18158	1.11233	0.903686	0.247002	0.207689	0.087436	0.3551	0.44549	0.20468	49	60	34	26	158	130	37	27	14	19	48231781	48234004	-	1465	MSTRG.101837	MSTRG.101837
MSTRG.101840.1	0	0	0	0	0	0	0	1.88255	0	0	61	0	0	0	0	0	0	0	19	48323354	48323724	-	350	MSTRG.101840	MSTRG.101840
MSTRG.101843.1	1.54144	1.92191	2.27247	0	1.40157	0.627897	3.16798	0.872561	0.261529	327	88	33	160	203	245	0	134	73	19	48332904	48334584	+	1096	MSTRG.101843	MSTRG.101843
MSTRG.101847.4	0.064454	0.619915	0	0	0.019285	0.017837	0	0	0	0	0	0	11	106	0	0	3	4	19	48350979	48353387	+	1758	MSTRG.101847	MSTRG.101847
MSTRG.101847.5	0	0	0.000439	0	0	0	0.330667	0	0	49	0	0	0	0	1	0	0	0	19	48352305	48354883	+	1553	MSTRG.101847	MSTRG.101847
MSTRG.101853.1	0	3.44189	0	0	0	0	0	0	0	0	0	0	0	271	0	0	0	0	19	48424557	48426555	+	817	MSTRG.101853	MSTRG.101853
MSTRG.101854.1	0	0	2.03711	0	0	0	0	0	0	0	0	0	0	0	40	0	0	0	19	48428635	48430733	-	200	MSTRG.101854	MSTRG.101854
MSTRG.101855.1	0.561684	0	0	0	1.50446	0	0	0	0	0	0	0	14	0	0	0	34	0	19	48429353	48431486	+	253	MSTRG.101855	MSTRG.101855
MSTRG.101855.2	0.710994	0	0	0.174504	1.35373	0	0	0	0	0	0	0	17	0	0	5	29	0	19	48429353	48431486	+	239	MSTRG.101855	MSTRG.101855
MSTRG.101856.1	3.40434	2.15015	4.30056	1.43053	0.978152	0	2.00346	0.339536	0	98	17	0	166	107	218	74	45	0	19	48432339	48432958	+	516	MSTRG.101856	MSTRG.101856
MSTRG.10186.1	0	0	2.15331	0	0	0	0	0	0	0	0	0	0	0	46	0	0	0	1	121043046	121044159	-	213	MSTRG.10186	MSTRG.10186
MSTRG.101861.22	1.3992	0.406104	0.777884	1.00935	2.22946	2.92976	0.646858	0	3.11841	29	0	164	62	19	36	47	90	144	19	48480882	48482477	+	463	MSTRG.101861	MSTRG.101861
MSTRG.101861.28	3.55536	0.458023	0	0	2.13943	0	0.349685	0.929251	1.05072	20	50	70	196	26	0	0	109	0	19	48522994	48524558	+	583	MSTRG.101861	MSTRG.101861
MSTRG.101861.6	5.6421	2.88739	2.56278	6.55457	2.06731	8.93102	5.39011	2.91477	15.6026	1492	786	5200	1565	819	740	1923	531	2773	19	48473088	48477078	+	2941	MSTRG.101861	MSTRG.101861
MSTRG.101861.7	0.157046	0.039096	0	0	0	0.340386	0	0	0.005106	0	0	1	13	4	0	0	0	31	19	48473088	48478889	+	838	MSTRG.101861	MSTRG.101861
MSTRG.101861.8	1.14555	2.18754	0.284103	0.390574	0	0.305219	0	0	0	0	0	0	85	165	22	31	0	26	19	48473412	48480378	+	782	MSTRG.101861	MSTRG.101861
MSTRG.101862.1	0.525357	0	0.510306	0	2.37949	0	0	0	0	0	0	0	17	0	17	0	69	0	19	48449661	48450952	+	330	MSTRG.101862	MSTRG.101862
MSTRG.101863.1	0.611505	0	0	0	0	1.23324	0	1.7319	0	0	60	0	22	0	0	0	0	50	19	48450090	48451428	+	377	MSTRG.101863	MSTRG.101863
MSTRG.101863.2	0.044188	0	0	0	0	0.0041	0	0.153409	0	0	5	0	2	0	0	0	0	1	19	48450172	48451428	+	295	MSTRG.101863	MSTRG.101863
MSTRG.101867.1	0.434447	0	1.91616	1.21608	3.13236	2.21049	2.55538	0.607714	2.25685	159	37	169	27	0	124	80	180	154	19	48459253	48461230	-	658	MSTRG.101867	MSTRG.101867
MSTRG.101867.2	1.31194	0.81823	1.21784	1.05133	2.12925	1.51822	2.10969	1.32557	0.651995	951	582	354	592	378	573	502	889	768	19	48460239	48466338	-	4787	MSTRG.101867	MSTRG.101867
MSTRG.101868.1	0.33349	0	2.85195	0	0	0	0.671428	0	0.220851	17	0	7	9	0	73	0	0	0	19	48481834	48483230	+	260	MSTRG.101868	MSTRG.101868
MSTRG.101868.2	1.17889	0.049552	0	0.565935	0	0	2.61418	0	0.472945	101	0	22	46	2	0	24	0	0	19	48481856	48483402	+	410	MSTRG.101868	MSTRG.101868
MSTRG.101868.3	0.190052	0.050334	0	0.029407	0	0	1.2997	0	0.94307	51	0	44	8	2	0	2	0	0	19	48481856	48483402	+	410	MSTRG.101868	MSTRG.101868
MSTRG.101869.1	0.06322	0	0	0	0	0.882849	0	0	4.8392	0	0	243	3	0	0	0	0	42	19	48511951	48513101	+	443	MSTRG.101869	MSTRG.101869
MSTRG.1019.1	0.169464	0.262219	0.478287	0	2.86504	0	0	0.932363	0	0	36	0	7	11	20	0	104	0	1	18002343	18003737	+	414	MSTRG.1019	MSTRG.1019
MSTRG.101902.1	0	0.133922	0	0	0	0	0	0	1.58397	0	0	56	0	5	0	0	0	0	19	48801914	48803327	+	312	MSTRG.101902	MSTRG.101902
MSTRG.101905.1	0.243541	0	0	0	0	1.6534	0	0	0	0	0	0	6	0	0	0	0	45	19	48809403	48810680	+	254	MSTRG.101905	MSTRG.101905
MSTRG.101905.2	0	0	0	0	0	2.26616	0	0	0	0	0	0	0	0	0	0	0	61	19	48809403	48810680	+	254	MSTRG.101905	MSTRG.101905
MSTRG.101906.1	0	0	0.034421	0.45893	0	0	2.53737	0	0	52	0	0	0	0	1	10	0	0	19	48821409	48822505	+	217	MSTRG.101906	MSTRG.101906
MSTRG.101907.1	2.32524	0.441851	0.818477	0.426305	0.775925	0	0.625582	0	0.085092	66	0	11	246	48	91	48	76	0	19	48824193	48825854	+	1121	MSTRG.101907	MSTRG.101907
MSTRG.101908.1	0	0	0	2.13988	0	0	0	0	0	0	0	0	0	0	0	132	0	0	19	48838872	48840550	+	618	MSTRG.101908	MSTRG.101908
MSTRG.10191.1	0	0	0	0	1.83537	0	0	0	0	0	0	0	0	0	0	0	45	0	1	121081372	121082578	-	278	MSTRG.10191	MSTRG.10191
MSTRG.10193.1	0	0	0	0	0	0	2.89649	0	0	57	0	0	0	0	0	0	0	0	1	121148993	121149768	-	209	MSTRG.10193	MSTRG.10193
MSTRG.101932.5	0.43079	0.695985	1.22133	0	0	0	2.21236	0	0	76	0	0	15	25	44	0	0	0	19	48904112	48904993	-	362	MSTRG.101932	MSTRG.101932
MSTRG.10194.1	0.522616	1.52044	0.439596	0.074482	0.206206	0.008227	0.939338	1.88338	0.040063	50	97	3	28	83	25	5	11	1	1	121197982	121208290	+	560	MSTRG.10194	MSTRG.10194
MSTRG.101940.1	1.58346	0	0	0.654473	0.497888	0	0	0	0.775706	0	0	38	63	0	0	28	19	0	19	48967984	48969526	-	422	MSTRG.101940	MSTRG.101940
MSTRG.101940.2	0.049286	0	0	1.679	0.371709	0	0	0	0	0	0	0	2	0	0	43	9	0	19	48968151	48969526	-	255	MSTRG.101940	MSTRG.101940
MSTRG.101942.6	0	0.08426	0	1.6196	0	0	0	0	0.244146	0	0	7	0	2	0	36	0	0	19	48981492	48981832	+	219	MSTRG.101942	MSTRG.101942
MSTRG.101943.1	0.183714	0	0	0	0	0	1.15834	0	0	58	0	0	10	0	0	0	0	0	19	48976884	48982092	-	530	MSTRG.101943	MSTRG.101943
MSTRG.101943.2	0	1.24865	0	0	0	0	1.1674	0	0	50	0	0	0	55	0	0	0	0	19	48979567	48982092	-	454	MSTRG.101943	MSTRG.101943
MSTRG.101944.1	0.205164	2.66607	0	0	0	0	0	0	0	0	0	0	5	67	0	0	0	0	19	48979986	48982314	-	257	MSTRG.101944	MSTRG.101944
MSTRG.10195.1	0	0	0	0	2.84921	0	0	0	0	0	0	0	0	0	0	0	77	0	1	121205349	121206663	-	307	MSTRG.10195	MSTRG.10195
MSTRG.101954.1	0	0	0	0	0	3.57711	0	0	0	0	0	0	0	0	0	0	0	129	19	49029089	49030474	+	341	MSTRG.101954	MSTRG.101954
MSTRG.101955.1	0	0	0	0	0	4.00076	0	0	1.2013	0	0	62	0	0	0	0	0	190	19	49031027	49032280	+	449	MSTRG.101955	MSTRG.101955
MSTRG.10196.1	0	0	0	0	1.34221	0	4.70933	0	0	160	0	0	0	0	0	0	43	0	1	121270589	121273022	-	361	MSTRG.10196	MSTRG.10196
MSTRG.101962.4	0	0	0	1.74851	0	0	0	0	0	0	0	0	0	0	0	68	0	0	19	49196186	49197641	-	386	MSTRG.101962	MSTRG.101962
MSTRG.101971.12	0.424129	0	0	0	1.28638	0	0	0	0	0	0	0	27	0	0	0	75	0	19	49262391	49264244	+	660	MSTRG.101971	MSTRG.101971
MSTRG.101985.1	0	3.14093	0.584626	0.154781	0	0	0	0	0	0	0	0	0	139	27	8	0	0	19	49305753	49307480	-	456	MSTRG.101985	MSTRG.101985
MSTRG.101998.1	0	0.036843	0	0	1.84944	0	0	0.014197	0	0	1	0	0	2	0	0	53	0	19	49328108	49329647	-	328	MSTRG.101998	MSTRG.101998
MSTRG.1020.1	2.38739	1.74552	0.9661	0	0.905203	0	0	0	0	0	0	0	78	59	33	0	28	0	1	18002578	18003903	+	345	MSTRG.1020	MSTRG.1020
MSTRG.102028.1	0	0	0.953109	0	1.22195	0	0	0	0	0	0	0	0	0	88	0	101	0	19	49370721	49372593	-	939	MSTRG.102028	MSTRG.102028
MSTRG.102029.1	4.64299	3.15247	1.15384	1.30051	1.45505	1.92977	2.76098	2.06103	0	102	74	0	172	119	45	51	50	80	19	49372908	49374122	-	391	MSTRG.102029	MSTRG.102029
MSTRG.102040.1	0.87634	0.847031	0	0.541753	1.93459	0	0.051172	0.705369	0	4	49	0	63	62	0	41	128	0	19	49399384	49401232	-	758	MSTRG.102040	MSTRG.102040
MSTRG.102040.2	0.374169	0.546662	0.070949	0	0.324957	0	0.34366	0.143247	0	25	10	0	27	40	6	0	22	0	19	49399384	49401232	-	758	MSTRG.102040	MSTRG.102040
MSTRG.102041.1	0.625404	0	0	0	0	0	0.36461	1.71492	0.313077	12	53	12	20	0	0	0	0	0	19	49401251	49402788	-	336	MSTRG.102041	MSTRG.102041
MSTRG.102041.2	0.097674	0	2.94788	0	1.69832	1.2034	0	0.411398	0	0	12	0	3	0	86	0	44	38	19	49401324	49402819	-	294	MSTRG.102041	MSTRG.102041
MSTRG.102041.3	0.34088	0	1.3636	0	0.11951	0.577545	0.474673	0	0	11	0	0	8	0	31	0	3	14	19	49401324	49402754	-	229	MSTRG.102041	MSTRG.102041
MSTRG.102042.1	0.675653	0	0	0.465915	0.14478	1.28349	0.568065	1.70804	0	12	33	0	14	0	0	10	3	28	19	49402316	49403720	-	206	MSTRG.102042	MSTRG.102042
MSTRG.102043.1	0	1.80418	0.252752	0	0	0	0	3.03292	0	0	61	0	0	38	6	0	0	0	19	49405744	49407847	-	216	MSTRG.102043	MSTRG.102043
MSTRG.102044.1	0	0	0	0	0.796032	0	0	0	3.24232	0	0	100	0	0	0	0	19	0	19	49406039	49408198	-	272	MSTRG.102044	MSTRG.102044
MSTRG.102045.1	2.43084	0	0.36851	0.014895	1.39479	0	1.46607	0	0	50	0	0	82	0	13	1	44	0	19	49406626	49408869	-	356	MSTRG.102045	MSTRG.102045
MSTRG.102047.1	0.230843	0	0.214395	1.39117	0	0	0.891279	0.834033	0	32	29	0	9	0	8	53	0	0	19	49412750	49415219	-	375	MSTRG.102047	MSTRG.102047
MSTRG.102053.1	0.165293	0	0	0	0	0	2.26676	0	0	56	0	0	5	0	0	0	0	0	19	49422152	49423318	-	261	MSTRG.102053	MSTRG.102053
MSTRG.102054.1	2.64822	3.17402	2.05806	1.74576	0.90252	1.08708	2.58852	2.50548	0	372	350	0	381	466	308	266	120	175	19	49422322	49424750	-	1523	MSTRG.102054	MSTRG.102054
MSTRG.102063.1	0	0.040159	0.301854	1.04495	1.68972	0	1.44235	0	0	69	0	0	0	2	15	53	75	0	19	49438839	49439775	-	503	MSTRG.102063	MSTRG.102063
MSTRG.102063.2	2.58007	0	0	0	0	1.37424	0	2.31854	0	0	90	0	103	0	0	0	0	61	19	49438908	49439761	-	420	MSTRG.102063	MSTRG.102063
MSTRG.102079.1	0	0	1.70482	0	0	0	0	0.219967	0	0	11	0	0	0	91	0	0	0	19	49610411	49612313	+	542	MSTRG.102079	MSTRG.102079
MSTRG.102079.2	0.319557	0.956986	0.356763	0	1.30227	0	1.00623	1.11084	0	49	53	0	16	48	19	0	59	0	19	49610436	49612313	+	517	MSTRG.102079	MSTRG.102079
MSTRG.102083.1	1.501	0.479748	0.463869	0	0.770503	0.408621	0	0.662705	0	0	65	0	151	50	49	0	72	46	19	49615414	49617578	+	1061	MSTRG.102083	MSTRG.102083
MSTRG.102087.1	0	0	0	0	0	3.99307	0	0	0	0	0	0	0	0	0	0	0	89	19	49631624	49639356	+	210	MSTRG.102087	MSTRG.102087
MSTRG.102088.1	0	0	0.320444	0.987992	0	0	0	0	1.49212	0	0	76	0	0	14	44	0	0	19	49634428	49635596	+	445	MSTRG.102088	MSTRG.102088
MSTRG.102091.1	0	1.80166	0	0	0	0	1.75452	0	0	53	0	0	0	56	0	0	0	0	19	49708051	49709418	+	320	MSTRG.102091	MSTRG.102091
MSTRG.102093.1	0	0	0	0	0	0	2.50128	0	0	77	0	0	0	0	0	0	0	0	19	49716031	49717533	+	325	MSTRG.102093	MSTRG.102093
MSTRG.102098.1	0	0	0	0.036098	0	0	1.16745	1.76153	4.43707	53	77	239	0	0	0	2	0	0	19	49765712	49767335	-	474	MSTRG.102098	MSTRG.102098
MSTRG.1021.1	0.838749	0	1.16261	1.52366	1.33699	0.615613	0.247195	1.56164	1.4696	39	235	273	130	0	187	249	191	107	1	18046519	18049729	+	1637	MSTRG.1021	MSTRG.1021
MSTRG.102106.1	0	0	0	0	0	0	0	0	2.37912	0	0	64	0	0	0	0	0	0	19	49924837	49925812	-	235	MSTRG.102106	MSTRG.102106
MSTRG.102107.1	0	0	0	0	0	0	3.9615	0	0	100	0	0	0	0	0	0	0	0	19	49933748	49934898	-	266	MSTRG.102107	MSTRG.102107
MSTRG.102108.1	0.042598	0.989861	0	0.115611	0	3.89669	0.349997	1.46358	3.05503	18	70	180	3	50	0	6	0	214	19	49950708	49952296	-	518	MSTRG.102108	MSTRG.102108
MSTRG.102108.2	0	0	0	0	0	0.906902	3.32902	0.79225	0.261461	113	27	11	0	0	0	0	0	35	19	49950866	49952296	-	360	MSTRG.102108	MSTRG.102108
MSTRG.102110.1	0.333412	0	0.570765	0.860416	0.441926	0.524947	0.786053	1.2632	0.061003	65	101	7	28	0	49	75	34	49	19	49965195	49966108	-	868	MSTRG.102110	MSTRG.102110
MSTRG.102111.1	0	0	0	0	0.263097	0.991263	1.24379	4.28904	0	38	125	0	0	0	0	0	8	34	19	49971063	49972191	-	318	MSTRG.102111	MSTRG.102111
MSTRG.102112.1	0.08706	0.230218	0	0	0	0.632312	2.39816	0	0	125	0	0	5	13	0	0	0	37	19	49977749	49985813	-	552	MSTRG.102112	MSTRG.102112
MSTRG.102114.1	0	0	1.53747	0	0	0	0	2.37412	0	0	89	0	0	0	62	0	0	0	19	50012844	50014378	-	406	MSTRG.102114	MSTRG.102114
MSTRG.102115.1	0.821811	0	0.385353	2.31458	0	0	0	0.948396	3.03491	0	18	69	16	0	8	47	0	0	19	50047111	50049695	-	200	MSTRG.102115	MSTRG.102115
MSTRG.102116.1	0.934172	0	0	0	0	0	0	4.35775	1.84234	0	129	68	29	0	0	0	0	0	19	50056955	50058377	-	321	MSTRG.102116	MSTRG.102116
MSTRG.102117.1	1.87405	0.482473	0	0.355487	0	0	4.0553	0	0.33619	105	0	11	49	13	0	10	0	0	19	50057819	50059194	-	273	MSTRG.102117	MSTRG.102117
MSTRG.102118.1	0	0	0	0	0	0	1.24059	4.30974	0	26	88	0	0	0	0	0	0	0	19	50079375	50080580	-	222	MSTRG.102118	MSTRG.102118
MSTRG.102119.1	0	0	0	0	0	0	0	0.171195	1.412	0	4	39	0	0	0	0	0	0	19	50087000	50088342	-	238	MSTRG.102119	MSTRG.102119
MSTRG.102129.1	0.295294	1.63255	2.79347	0.505525	1.11933	0	0.516255	1.28803	0	28	66	0	16	88	154	29	55	0	19	50211256	50213006	-	559	MSTRG.102129	MSTRG.102129
MSTRG.102129.2	0	0	0.525402	0	0	0	0	0	0	0	0	0	0	0	11	0	0	0	19	50211606	50213006	-	208	MSTRG.102129	MSTRG.102129
MSTRG.102139.12	0.695552	0	0	0	0	0.773613	0	0	0.025702	0	0	2	24	0	0	0	0	30	19	50620506	50621736	+	362	MSTRG.102139	MSTRG.102139
MSTRG.102140.1	1.75571	0.525078	0.188715	0.227002	0	0.462591	0.099802	0.411079	0	7	27	0	117	36	13	16	0	35	19	50344890	50348980	+	701	MSTRG.102140	MSTRG.102140
MSTRG.102140.2	0.396382	0.536546	4.05017	1.78532	0.61651	0	2.10563	0	0	88	0	0	17	23	177	79	24	0	19	50345148	50348980	+	443	MSTRG.102140	MSTRG.102140
MSTRG.102141.1	0.797544	0.467347	0	0.325178	1.03157	0	0	0.627436	0	0	23	0	30	18	0	13	36	0	19	50345838	50347377	+	398	MSTRG.102141	MSTRG.102141
MSTRG.102141.2	2.13295	2.85098	2.18495	0.299602	0.626365	0	2.54074	2.44294	0.801037	100	94	38	84	115	90	13	23	0	19	50345979	50349786	+	416	MSTRG.102141	MSTRG.102141
MSTRG.102142.1	0.681905	0.064258	0	0	0	2.25122	0	0	0.882205	0	0	21	13	2	0	0	0	48	19	50350311	50350562	+	201	MSTRG.102142	MSTRG.102142
MSTRG.102143.1	0	1.21821	0.631243	0.71169	0	0	1.95873	0	0	53	0	0	0	34	18	21	0	0	19	50354881	50355597	+	287	MSTRG.102143	MSTRG.102143
MSTRG.102144.1	1.58564	2.56051	1.93199	0	0.978701	0.500283	0.21007	2.66179	0.628316	23	277	81	170	280	215	0	97	60	19	50359506	50360668	+	1133	MSTRG.102144	MSTRG.102144
MSTRG.102145.1	0.348631	0	0.194988	0.883197	0.274496	0	0	2.11474	1.07063	0	154	97	27	0	16	70	19	0	19	50396563	50398566	+	794	MSTRG.102145	MSTRG.102145
MSTRG.102146.1	0	0	0	0	0	0	1.50057	0	0	47	0	0	0	0	0	0	0	0	19	50397737	50399296	+	332	MSTRG.102146	MSTRG.102146
MSTRG.102147.1	0	0	2.45113	0	0.042712	0	0	2.50377	0	0	89	0	0	0	94	0	2	0	19	50414811	50415921	+	387	MSTRG.102147	MSTRG.102147
MSTRG.102147.2	0.534905	0	1.67029	0	0.390769	0	0.836515	0.727427	0	23	20	0	15	0	48	0	10	0	19	50414908	50415921	+	290	MSTRG.102147	MSTRG.102147
MSTRG.102148.1	0	0	0	0	0	0	0	0.202071	1.88266	0	5	57	0	0	0	0	0	0	19	50463294	50464485	+	265	MSTRG.102148	MSTRG.102148
MSTRG.102149.1	1.16501	2.13417	3.63377	1.1599	3.49253	0.382894	1.26846	1.80314	0	131	182	0	121	226	392	127	334	45	19	50498206	50501437	+	1096	MSTRG.102149	MSTRG.102149
MSTRG.102153.1	0.151438	1.02929	1.45985	1.26812	0.20537	0.506427	0	0.078546	0	0	10	0	20	134	193	171	25	72	19	50547414	50549795	+	1345	MSTRG.102153	MSTRG.102153
MSTRG.102155.1	1.4307	0	0	1.25428	1.06991	0.63982	0.207596	0.296357	0.879038	13	18	63	86	0	0	80	59	43	19	50550658	50552026	+	632	MSTRG.102155	MSTRG.102155
MSTRG.102158.1	0.427512	0.074391	0.222657	0	0	0	1.19888	4.07947	0	56	184	0	20	4	11	0	0	0	19	50609636	50611001	+	491	MSTRG.102158	MSTRG.102158
MSTRG.102159.1	1.81443	3.1407	4.42709	1.6685	1.78318	3.39465	1.30888	0.258217	0.58391	168	33	90	233	411	590	226	211	487	19	50620851	50623069	+	1357	MSTRG.102159	MSTRG.102159
MSTRG.102159.2	0	0	0	1.36966	0	0.673434	0	0	0	0	0	0	0	0	0	36	0	19	19	50620851	50621980	+	259	MSTRG.102159	MSTRG.102159
MSTRG.102162.1	0	0	0	1.45845	0	0	0	0	0	0	0	0	0	0	0	51	0	0	19	50627180	50630033	+	346	MSTRG.102162	MSTRG.102162
MSTRG.102164.1	0	0	0	0	0	0	1.90418	0	0	38	0	0	0	0	0	0	0	0	19	50641495	50642918	+	211	MSTRG.102164	MSTRG.102164
MSTRG.102187.1	1.40139	0	1.08859	0	0	0	0	0	0	0	0	0	76	0	62	0	0	0	19	50800007	50800605	+	573	MSTRG.102187	MSTRG.102187
MSTRG.102190.1	0.347382	0	0.867561	1.44249	0	0.547123	0	0	3.59194	0	0	300	25	0	63	107	0	43	19	50802458	50804415	+	737	MSTRG.102190	MSTRG.102190
MSTRG.102190.2	0	0	0.880927	0	0	0	0	0	0	0	0	0	0	0	33	0	0	0	19	50802459	50867038	+	380	MSTRG.102190	MSTRG.102190
MSTRG.102196.1	2.54782	0.519806	0.700612	0.929061	0.613696	2.18176	1.18369	8.85966	0.323308	36	261	12	78	17	23	30	18	74	19	50811673	50812694	+	321	MSTRG.102196	MSTRG.102196
MSTRG.102197.1	0.976671	1.00382	0.590007	0.268356	1.88915	0	0.315495	0.08366	3.19719	26	7	308	79	83	50	23	140	0	19	50812914	50814809	+	850	MSTRG.102197	MSTRG.102197
MSTRG.102197.2	0.388681	0	0	0.193017	0	0	0.006962	0.969411	0.231056	1	38	12	16	0	0	9	0	0	19	50812981	50814451	+	425	MSTRG.102197	MSTRG.102197
MSTRG.102197.3	0.146923	0	1.24525	0.057755	0.563589	0	0.225513	0	0.740018	12	0	45	8	0	66	4	27	0	19	50813085	50814666	+	536	MSTRG.102197	MSTRG.102197
MSTRG.102197.4	0	1.3691	0	0.030785	0	0	0	0	0	0	0	0	0	33	0	1	0	0	19	50813513	50814809	+	249	MSTRG.102197	MSTRG.102197
MSTRG.102197.5	0	0	0	0	1.24475	0.824828	2.05425	0.465745	0	112	25	0	0	0	0	0	63	51	19	50813744	50816483	+	578	MSTRG.102197	MSTRG.102197
MSTRG.102197.6	0	0	0	0	0	0	0	1.16922	0	0	46	0	0	0	0	0	0	0	19	50813769	50815246	+	429	MSTRG.102197	MSTRG.102197
MSTRG.102198.1	0	0	0	0	0	0.512367	1.95914	0	0	53	0	0	0	0	0	0	0	16	19	50816003	50817397	+	286	MSTRG.102198	MSTRG.102198
MSTRG.102200.1	0	0	2.33472	0	0.005805	1.50089	0	0	0	0	0	0	0	0	70	0	1	48	19	50819756	50822502	+	303	MSTRG.102200	MSTRG.102200
MSTRG.102210.1	0	0	2.70036	0.102059	0	0	0	0	0	0	0	0	0	0	64	3	0	0	19	50862346	50863479	-	241	MSTRG.102210	MSTRG.102210
MSTRG.102227.20	3.50797	0.04327	2.34386	0.087635	0	1.89326	0	1.30001	0.367849	0	51	18	140	2	97	4	0	85	19	51058470	51060003	-	421	MSTRG.102227	MSTRG.102227
MSTRG.102227.21	0	0	0.216608	0	0	0.883406	0	0.066762	0.368751	0	3	16	0	0	9	0	0	36	19	51058514	51060003	-	380	MSTRG.102227	MSTRG.102227
MSTRG.102229.1	1.39954	0	2.408	0.62205	0.640562	0	0.065927	0.192099	1.1287	4	11	78	80	0	144	38	34	0	19	51052713	51054462	-	606	MSTRG.102229	MSTRG.102229
MSTRG.102230.1	1.11073	0.899447	0.448771	0.307398	0	0.666073	0	0	0	0	0	0	76	63	32	23	0	51	19	51055867	51057864	-	719	MSTRG.102230	MSTRG.102230
MSTRG.102230.2	0.060392	0.133364	0.034778	0.040603	0	0.035888	0.406341	3.11878	0	29	214	0	5	10	3	4	0	3	19	51055922	51059054	-	746	MSTRG.102230	MSTRG.102230
MSTRG.102236.1	0	0.299183	3.12356	0	0	0	0	0	0	0	0	0	0	8	85	0	0	0	19	51092140	51093533	-	275	MSTRG.102236	MSTRG.102236
MSTRG.102239.4	0.003094	0.489868	0	0.09023	0	0	3.74192	0	0	113	0	0	1	16	0	3	0	0	19	51112366	51113379	+	320	MSTRG.102239	MSTRG.102239
MSTRG.102240.1	1.15694	0	1.35681	0	2.26164	0	0	0	0	0	0	0	48	0	58	0	86	0	19	51097413	51119386	-	432	MSTRG.102240	MSTRG.102240
MSTRG.102240.2	1.36765	0	0	0	0	0	0	0	0	0	0	0	32	0	0	0	0	0	19	51109919	51119386	-	246	MSTRG.102240	MSTRG.102240
MSTRG.102241.1	0.192242	1.78924	1.41187	0	0	0	0	0	0	0	0	0	7	63	51	0	0	0	19	51112758	51113815	+	361	MSTRG.102241	MSTRG.102241
MSTRG.102244.1	0.152264	0.131032	4.07861	2.28702	0	0	0	0	0	0	0	0	5	5	137	78	0	0	19	51129404	51130210	-	340	MSTRG.102244	MSTRG.102244
MSTRG.102251.1	0	1.91883	1.45219	0.811083	0	0	0	0	0	0	0	0	0	48	37	21	0	0	19	51155661	51156770	-	259	MSTRG.102251	MSTRG.102251
MSTRG.102252.1	0	0.939181	0	3.37246	0.951817	0	0	0	0	0	0	0	0	33	0	120	30	0	19	51157923	51159389	-	354	MSTRG.102252	MSTRG.102252
MSTRG.102254.1	0.656353	1.21996	1.04539	1.4385	3.15815	0	0.740271	0.548072	1.00918	67	49	110	60	113	99	138	265	0	19	51163944	51165927	-	959	MSTRG.102254	MSTRG.102254
MSTRG.102255.1	0.398166	3.47306	0	0	0	0	0	2.36415	0	0	67	0	12	104	0	0	0	0	19	51173719	51174863	-	308	MSTRG.102255	MSTRG.102255
MSTRG.102256.1	1.58336	0.713066	1.23573	0.038962	1.14362	0	0.153159	0.523763	0	10	31	0	94	44	77	3	63	0	19	51181833	51183667	-	629	MSTRG.102256	MSTRG.102256
MSTRG.102256.2	0.461015	0.564748	1.11134	0.672574	1.48379	0	0	0	0	0	0	0	28	35	69	42	81	0	19	51181836	51183667	-	626	MSTRG.102256	MSTRG.102256
MSTRG.102256.3	0.342301	0	0.385126	0	0.051041	0	0	0	3.78947	0	0	166	13	0	15	0	2	0	19	51182077	51183667	-	385	MSTRG.102256	MSTRG.102256
MSTRG.102259.1	0	1.38356	0	0	0	0	0	0	0	0	0	0	0	33	0	0	0	0	19	51194776	51195512	+	241	MSTRG.102259	MSTRG.102259
MSTRG.102263.1	0	0.144383	1.45225	0	0	0	0	1.44016	0	0	53	0	0	6	57	0	0	0	19	51199345	51201077	+	398	MSTRG.102263	MSTRG.102263
MSTRG.102264.1	0	2.49041	0	0	0	0	0	0	0	0	0	0	0	61	0	0	0	0	19	51200066	51201653	+	253	MSTRG.102264	MSTRG.102264
MSTRG.10227.1	0	0	0	3.04332	0	0	0	0	0.454705	0	0	17	0	0	0	97	0	0	1	121345517	121347050	-	317	MSTRG.10227	MSTRG.10227
MSTRG.102274.4	0	0	0	1.67094	0	0.170951	0	0	0	0	0	0	0	0	0	92	0	10	19	51296862	51297699	+	552	MSTRG.102274	MSTRG.102274
MSTRG.102275.1	0	0	0	0	0	0	0	0	2.47124	0	0	135	0	0	0	0	0	0	19	51284229	51285902	+	479	MSTRG.102275	MSTRG.102275
MSTRG.10228.1	0	0	0	0	0	0	0	2.9182	0	0	56	0	0	0	0	0	0	0	1	121346152	121347572	-	206	MSTRG.10228	MSTRG.10228
MSTRG.102287.5	0.700735	0	0	0	0	0	1.01458	0	0	36	0	0	25	0	0	0	0	0	19	51321069	51322432	+	375	MSTRG.102287	MSTRG.102287
MSTRG.102288.1	2.14478	0	0.178321	0.438802	0	0.708519	0	3.2162	0	0	136	0	93	0	9	21	0	35	19	51310658	51311143	+	460	MSTRG.102288	MSTRG.102288
MSTRG.102298.7	0.749609	0	2.13541	0	0.796876	0	1.156	5.15896	0.403789	28	122	12	19	0	54	0	18	0	19	51356472	51357974	+	256	MSTRG.102298	MSTRG.102298
MSTRG.102298.8	0.534471	0	0	0	0.193697	0	1.30445	3.43554	0	32	81	0	13	0	0	0	5	0	19	51356472	51357974	+	256	MSTRG.102298	MSTRG.102298
MSTRG.102299.1	0	0	0	1.71339	0.549267	0	0	0	2.12515	0	0	72	0	0	0	51	15	0	19	51347615	51348962	+	296	MSTRG.102299	MSTRG.102299
MSTRG.102299.2	1.47871	4.77942	0.825641	1.04201	1.73083	3.64874	0	3.3869	0.9219	0	102	35	46	151	27	34	50	126	19	51348404	51349777	+	327	MSTRG.102299	MSTRG.102299
MSTRG.10230.1	1.50413	0.928716	0	0	0.57317	0	0	0	0	0	0	0	57	36	0	0	20	0	1	121349755	121351389	-	400	MSTRG.10230	MSTRG.10230
MSTRG.102300.1	0.126887	0.073926	0	0	0	2.77915	0.310429	0	0	6	0	0	3	2	0	0	0	60	19	51348062	51349317	+	204	MSTRG.102300	MSTRG.102300
MSTRG.102301.1	2.19162	3.03219	1.95216	1.47901	0.184505	0	0	0.625256	1.19989	0	53	125	190	268	176	135	15	0	19	51355300	51357464	+	915	MSTRG.102301	MSTRG.102301
MSTRG.102301.2	1.05298	0.505484	0.17331	0.286155	2.68579	1.39071	0.553331	0.943484	0.667471	48	79	69	91	45	16	26	213	134	19	51355306	51357464	+	909	MSTRG.102301	MSTRG.102301
MSTRG.102302.1	1.77549	0	2.11477	0.771033	1.62594	2.05278	1.38431	1.44112	1.30183	80	81	91	103	0	128	48	87	133	19	51371210	51371844	+	612	MSTRG.102302	MSTRG.102302
MSTRG.102303.1	3.52692	2.49215	1.89827	0.56005	4.51637	0.757934	2.43326	2.60865	0.368642	358	373	66	519	375	291	88	615	125	19	51407644	51409978	+	1560	MSTRG.102303	MSTRG.102303
MSTRG.102303.2	0	2.26187	2.28415	0.859327	1.26119	0.932973	0	2.35586	0.328595	0	165	29	0	167	171	66	84	76	19	51408439	51409978	+	762	MSTRG.102303	MSTRG.102303
MSTRG.102303.3	0.631075	1.9267	1.27318	0.273375	1.45999	0.1269	0.260278	2.30482	0.321293	19	161	28	46	142	96	21	97	11	19	51408440	51409978	+	761	MSTRG.102303	MSTRG.102303
MSTRG.102306.1	1.24795	0.604131	0.803978	1.89074	1.50633	2.97294	0.94147	0	0.788683	82	0	83	109	54	74	175	122	291	19	51420235	51422319	+	925	MSTRG.102306	MSTRG.102306
MSTRG.102309.1	1.38511	0.167515	1.24473	1.4014	0	1.33952	0.225422	0.276004	0.669298	21	24	72	124	16	116	133	0	135	19	51427741	51429744	+	949	MSTRG.102309	MSTRG.102309
MSTRG.102309.2	0	0	0	0	0	2.46064	0.840744	0	0	49	0	0	0	0	0	0	0	159	19	51428779	51430453	+	610	MSTRG.102309	MSTRG.102309
MSTRG.102314.1	3.44253	2.93225	0.453903	1.32203	0.710113	0	0	0	0	0	0	0	110	95	15	45	21	0	19	51437931	51439403	+	336	MSTRG.102314	MSTRG.102314
MSTRG.102325.33	2.55124	2.11236	0.103086	0.924883	0.429443	0.651534	0.96998	0.73801	0.641007	58	43	46	151	128	7	58	24	44	19	51541606	51544192	+	626	MSTRG.102325	MSTRG.102325
MSTRG.102326.1	0.404379	1.18413	0.220228	0.077074	0.710999	1.85239	0	0	0.314131	0	0	12	13	38	8	3	21	66	19	51542268	51544561	+	333	MSTRG.102326	MSTRG.102326
MSTRG.10233.1	0	0	0	0	0.331508	2.02121	0	0	0	0	0	0	0	0	0	0	7	45	1	121353374	121354360	-	209	MSTRG.10233	MSTRG.10233
MSTRG.102340.1	0	3.20753	0	0	0	0	0	0	0	0	0	0	0	88	0	0	0	0	19	51588854	51589902	+	284	MSTRG.102340	MSTRG.102340
MSTRG.10235.1	0	0	0	0	0	2.81569	0	0	0	0	0	0	0	0	0	0	0	78	1	121355360	121356347	-	261	MSTRG.10235	MSTRG.10235
MSTRG.102353.1	1.0255	1.17017	0	0.640345	0	0.166454	0.358751	4.40066	0.508148	9	101	15	24	28	0	16	0	5	19	51639882	51640898	+	248	MSTRG.102353	MSTRG.102353
MSTRG.102354.1	0.349702	0	2.80517	0	0	0	0	0	0	0	0	0	12	0	95	0	0	0	19	51646755	51648215	+	343	MSTRG.102354	MSTRG.102354
MSTRG.102354.2	0	0	1.88789	0	0	0	0	0	0	0	0	0	0	0	64	0	0	0	19	51646755	51648215	+	343	MSTRG.102354	MSTRG.102354
MSTRG.102359.1	0.983981	0.468838	0.889888	1.15864	0.329493	1.76137	2.7843	1.29141	0.265773	226	103	26	80	39	76	100	25	161	19	51654431	51656464	+	862	MSTRG.102359	MSTRG.102359
MSTRG.102362.3	0	0	0	0	0	0	0	0	1.26778	0	0	57	0	0	0	0	0	0	19	51830373	51831543	-	390	MSTRG.102362	MSTRG.102362
MSTRG.102365.1	0.493984	1.61638	1.17041	0	0	0	0	0	0	0	0	0	22	72	53	0	0	0	19	51679338	51681077	-	457	MSTRG.102365	MSTRG.102365
MSTRG.102366.1	0	0	0	0	0	1.32352	0	0	0	0	0	0	0	0	0	0	0	52	19	51680159	51681812	-	371	MSTRG.102366	MSTRG.102366
MSTRG.102367.1	1.12161	0	0	0	0	0	0	1.94458	0	0	41	0	24	0	0	0	0	0	19	51692165	51693584	-	227	MSTRG.102367	MSTRG.102367
MSTRG.102368.1	0	0	0	0	0	0	1.98238	0	0	52	0	0	0	0	0	0	0	0	19	51692989	51694462	-	275	MSTRG.102368	MSTRG.102368
MSTRG.102369.1	0	0.731539	0.241955	0	0	0	0	3.59105	0	0	115	0	0	25	9	0	0	0	19	51702951	51704575	-	348	MSTRG.102369	MSTRG.102369
MSTRG.102370.1	0	0	0	0	0	0	0	0	4.6155	0	0	159	0	0	0	0	0	0	19	51711986	51713508	-	304	MSTRG.102370	MSTRG.102370
MSTRG.102372.1	1.79576	0	2.55401	0	0	0	0	2.57267	2.48087	0	70	83	50	0	74	0	0	0	19	51744428	51745937	-	294	MSTRG.102372	MSTRG.102372
MSTRG.102373.1	0	0	0	0	0	0	0	6.80837	2.1443	0	136	53	0	0	0	0	0	0	19	51764581	51765537	-	217	MSTRG.102373	MSTRG.102373
MSTRG.102374.1	0.348259	0.968663	1.0227	0.20171	0.405367	1.68596	0	0.234935	0	0	18	0	27	77	83	17	29	146	19	51772085	51773923	-	818	MSTRG.102374	MSTRG.102374
MSTRG.102376.1	0	0	0	0.37776	0	0	0	0	1.38937	0	0	48	0	0	0	12	0	0	19	51834398	51835879	-	299	MSTRG.102376	MSTRG.102376
MSTRG.102377.1	0	0	0	0	0	0	0	0	2.97871	0	0	80	0	0	0	0	0	0	19	51862571	51863596	-	235	MSTRG.102377	MSTRG.102377
MSTRG.102378.1	0	0	2.03711	0	0	0	0	0	0	0	0	0	0	0	41	0	0	0	19	51896396	51897808	-	201	MSTRG.102378	MSTRG.102378
MSTRG.102379.1	0	0	0	1.33675	0	0	0	0	0	0	0	0	0	0	0	34	0	0	19	51936001	51937447	-	250	MSTRG.102379	MSTRG.102379
MSTRG.102381.1	0	0	2.33494	0	0	0	0	0	1.765	0	0	41	0	0	47	0	0	0	19	51971161	51972440	-	202	MSTRG.102381	MSTRG.102381
MSTRG.102382.1	0.732397	0	0	0.245687	1.91628	0	0	2.58988	0.470976	0	181	41	53	0	0	19	127	0	19	52018558	52020541	-	759	MSTRG.102382	MSTRG.102382
MSTRG.102384.1	0	0	2.44966	0	0	0	0	0	0	0	0	0	0	0	70	0	0	0	19	52172329	52175790	-	291	MSTRG.102384	MSTRG.102384
MSTRG.102419.1	0	0	0	0	0	3.73038	0	0	0	0	0	0	0	0	0	0	0	119	19	52502887	52504080	-	300	MSTRG.102419	MSTRG.102419
MSTRG.102427.1	0	0	0	0	0	0	0	0	2.00033	0	0	60	0	0	0	0	0	0	19	53358222	53359727	+	261	MSTRG.102427	MSTRG.102427
MSTRG.102428.1	0	1.79613	2.44146	0	0.069899	0	0	0	0	0	0	0	0	39	53	0	2	0	19	53518908	53546246	-	221	MSTRG.102428	MSTRG.102428
MSTRG.102431.1	0.825338	0.313573	0.185719	0	2.93443	0	0	0	0	0	0	0	19	8	5	0	60	0	19	53840249	53842507	+	234	MSTRG.102431	MSTRG.102431
MSTRG.102433.1	4.37998	0	0.637448	1.3497	1.03319	0	0	2.99993	4.54258	0	159	298	239	0	37	78	53	0	19	53842713	53844579	+	578	MSTRG.102433	MSTRG.102433
MSTRG.102437.1	2.05458	1.10082	0.135445	0.446601	0.802081	0	1.17247	0	1.18124	89	0	107	155	85	11	36	56	0	19	53851256	53853213	+	799	MSTRG.102437	MSTRG.102437
MSTRG.102437.2	1.64224	0.037769	0.457599	0.381226	0.251353	0.301886	0	0	0.055022	0	0	5	124	3	36	31	18	26	19	53851256	53853213	+	799	MSTRG.102437	MSTRG.102437
MSTRG.102437.3	0.660318	0.291531	0.038282	0.531822	0.491347	0	0.732903	0	0	33	0	0	30	14	2	25	21	0	19	53851350	53852975	+	467	MSTRG.102437	MSTRG.102437
MSTRG.102441.1	4.53514	0.655943	0.048289	0	0.778503	3.30454	2.90623	0.93991	0	349	110	0	545	81	7	0	87	445	19	53857699	53860200	+	1274	MSTRG.102441	MSTRG.102441
MSTRG.102441.2	1.09282	0	0	0	0.814677	0.681641	3.33404	0	0	108	0	0	36	0	0	0	25	25	19	53857757	53859333	+	342	MSTRG.102441	MSTRG.102441
MSTRG.102448.1	0.346305	0	0	0.244302	0.246452	0	2.2235	0	0	49	0	0	8	0	0	6	5	0	19	53874473	53875303	+	232	MSTRG.102448	MSTRG.102448
MSTRG.10247.1	0	0	0	0	2.1133	0	0	0	0	0	0	0	0	0	0	0	50	0	1	121387070	121388442	-	268	MSTRG.10247	MSTRG.10247
MSTRG.102470.1	0	0	0	2.00512	0	0	0	0	0	0	0	0	0	0	0	45	0	0	19	54177180	54178224	+	222	MSTRG.102470	MSTRG.102470
MSTRG.102487.1	0	0	0	0	1.68242	0	0	0	0	0	0	0	0	0	0	0	40	0	19	54487642	54488523	-	270	MSTRG.102487	MSTRG.102487
MSTRG.102501.1	1.21176	0.722067	2.18214	0.489422	0	0	0	0	0	0	0	0	100	61	186	43	0	0	19	54544730	54546791	-	868	MSTRG.102501	MSTRG.102501
MSTRG.102507.1	0	0	0	0.133675	0.737073	1.64223	0	0.502452	0	0	11	0	0	0	0	3	15	39	19	54554619	54555969	-	223	MSTRG.102507	MSTRG.102507
MSTRG.102514.1	1.41555	0	1.5605	1.13498	0	0	0	0	0	0	0	0	36	0	41	30	0	0	19	54616758	54617719	-	265	MSTRG.102514	MSTRG.102514
MSTRG.102515.8	1.40362	0	0	0.375979	0	0	2.2562	0	0.172648	95	0	9	59	0	0	17	0	0	19	54632265	54633774	+	443	MSTRG.102515	MSTRG.102515
MSTRG.102516.1	1.30942	2.88682	2.70246	1.87724	3.86825	1.87352	2.06291	2.52715	0	54	65	0	35	78	74	53	94	55	19	54622747	54624095	+	278	MSTRG.102516	MSTRG.102516
MSTRG.102516.2	0.566033	0	0	0.972676	0	0	0	0	0	0	0	0	16	0	0	28	0	0	19	54622747	54624095	+	282	MSTRG.102516	MSTRG.102516
MSTRG.102517.1	0	0	0	0	0	0	1.5584	0	0	32	0	0	0	0	0	0	0	0	19	54642948	54644284	+	217	MSTRG.102517	MSTRG.102517
MSTRG.102520.1	1.19456	0.8349	0.711839	1.08326	0.450282	0.444884	1.37446	2.22131	1.21667	215	338	229	187	134	116	179	66	78	19	54647084	54649727	-	1656	MSTRG.102520	MSTRG.102520
MSTRG.102520.2	0.219525	0	0	0.006029	0.105445	0	0	0	0	0	0	0	22	0	0	1	10	0	19	54647707	54649727	-	1032	MSTRG.102520	MSTRG.102520
MSTRG.102521.1	0	0	0	1.3916	0.444729	0	0	0	5.3306	0	0	161	0	0	0	37	11	0	19	54648508	54649759	+	265	MSTRG.102521	MSTRG.102521
MSTRG.102521.2	0	0	0	0	2.46387	0	0	0	0.980721	0	0	29	0	0	0	0	55	0	19	54648519	54649759	+	253	MSTRG.102521	MSTRG.102521
MSTRG.102522.1	0.955559	0	0	0	0	0	2.88033	0	1.80979	114	0	86	38	0	0	0	0	0	19	54648829	54650231	+	417	MSTRG.102522	MSTRG.102522
MSTRG.102525.1	0.494487	0	1.41813	0	0	0	0	0	0	0	0	0	15	0	43	0	0	0	19	54651593	54652951	-	303	MSTRG.102525	MSTRG.102525
MSTRG.102532.1	0	0	2.15862	0	0.659082	0	0	0	0	0	0	0	0	0	65	0	18	0	19	54684868	54686216	-	304	MSTRG.102532	MSTRG.102532
MSTRG.102533.1	0.098182	0	0.651039	0	0.637281	0	0	3.06824	1.99107	0	61	49	2	0	14	0	13	0	19	54695273	54696728	-	216	MSTRG.102533	MSTRG.102533
MSTRG.102533.2	0.643737	0	0.2654	0	0	0	0	2.61826	0	0	50	0	13	0	6	0	0	0	19	54695274	54696728	-	207	MSTRG.102533	MSTRG.102533
MSTRG.102534.1	1.8149	0	2.05142	0	0	0	0	0	0	0	0	0	70	0	83	0	0	0	19	54695749	54697392	-	408	MSTRG.102534	MSTRG.102534
MSTRG.102535.1	0.46297	0	0	1.51638	1.00438	1.26126	0	3.41989	0.317168	0	160	19	23	0	0	77	45	68	19	54701892	54702878	-	509	MSTRG.102535	MSTRG.102535
MSTRG.102536.1	1.13404	0.543119	1.32758	1.17644	0.606974	0	1.33177	0.621082	0	68	31	0	58	29	70	64	29	0	19	54707484	54708897	-	537	MSTRG.102536	MSTRG.102536
MSTRG.102536.2	0.669659	0	1.55842	0	1.36389	0	0	0	0	0	0	0	22	0	53	0	41	0	19	54707681	54708897	-	340	MSTRG.102536	MSTRG.102536
MSTRG.102545.1	0	0	0	0	0	0	2.84488	0	1.75825	103	0	77	0	0	0	0	0	0	19	54770303	54771397	-	384	MSTRG.102545	MSTRG.102545
MSTRG.102547.7	4.38873	0.968634	2.87329	0.452971	1.08939	2.57934	4.06961	0.992841	1.98215	159	38	93	172	39	117	19	40	113	19	54797991	54799552	+	414	MSTRG.102547	MSTRG.102547
MSTRG.102548.1	1.78224	2.55291	0	0	2.59589	0	2.72939	0	0	75	0	0	49	72	0	0	66	0	19	54804200	54805671	+	290	MSTRG.102548	MSTRG.102548
MSTRG.102549.1	0.158069	0	1.56955	0	0.661173	0	0	0	0	0	0	0	5	0	42	0	16	0	19	54824259	54825598	+	271	MSTRG.102549	MSTRG.102549
MSTRG.102552.1	1.44267	1.25829	0	2.15867	0	3.90839	1.668	1.1479	0	47	32	0	41	36	0	64	0	123	19	54863705	54867667	-	296	MSTRG.102552	MSTRG.102552
MSTRG.102554.1	0.58623	0	0	0	0	0	3.16116	1.98724	1.31742	158	97	80	30	0	0	0	0	0	19	54867719	54868962	-	530	MSTRG.102554	MSTRG.102554
MSTRG.102554.2	0.003019	3.40494	0	1.15548	1.36196	0	0	0	0	0	0	0	1	145	0	51	53	0	19	54867837	54868962	-	441	MSTRG.102554	MSTRG.102554
MSTRG.102557.1	0	0	0	0.3176	0	4.76485	0	3.29799	0	0	83	0	0	0	0	9	0	138	19	54892275	54893224	-	274	MSTRG.102557	MSTRG.102557
MSTRG.102562.1	1.55964	1.86972	0	1.07937	0	0	0	0	0	0	0	0	107	131	0	78	0	0	19	54906964	54908799	+	724	MSTRG.102562	MSTRG.102562
MSTRG.102572.2	0.310517	0.419338	1.19667	0.529351	0	1.02964	1.07987	0.349483	1.85624	45	14	92	13	18	51	23	0	48	19	54976545	54978188	+	433	MSTRG.102572	MSTRG.102572
MSTRG.102578.1	0	0	0	0	2.56421	0	0	0	0	0	0	0	0	0	0	0	55	0	19	54987061	54988496	+	245	MSTRG.102578	MSTRG.102578
MSTRG.102581.1	0.226974	0	0	0	0	2.3567	0	0	0.942426	0	0	23	5	0	0	0	0	54	19	55012003	55012676	+	215	MSTRG.102581	MSTRG.102581
MSTRG.102582.1	0	0.544811	2.46936	0.146938	1.10247	0	0.499436	0	0	25	0	0	0	27	125	8	50	0	19	55046760	55048157	+	514	MSTRG.102582	MSTRG.102582
MSTRG.102583.1	1.45261	0	0	0.075123	0.564072	2.0486	0	2.02038	1.08234	0	90	60	67	0	0	4	24	105	19	55054805	55055708	+	484	MSTRG.102583	MSTRG.102583
MSTRG.102584.1	0.161172	2.38157	0	0	0.24116	0	0	2.11497	0	0	109	0	9	129	0	0	12	0	19	55057659	55058793	+	558	MSTRG.102584	MSTRG.102584
MSTRG.102584.2	1.62423	2.22804	0.926011	0.717022	1.39869	1.25725	0.755331	0.566933	0.402556	66	49	43	142	199	85	67	113	123	19	55057920	55059423	+	926	MSTRG.102584	MSTRG.102584
MSTRG.102585.1	1.6828	0.903418	0.277929	0	0.62737	0	0.591218	1.15448	2.68136	33	63	179	94	52	17	0	33	0	19	55079188	55080399	+	589	MSTRG.102585	MSTRG.102585
MSTRG.102586.1	3.22103	0.99848	1.91369	0.494038	0.786836	0.292997	4.24694	0	1.16101	211	0	70	160	51	99	26	37	17	19	55084964	55085547	+	526	MSTRG.102586	MSTRG.102586
MSTRG.102587.1	0	2.40979	0	0	0.882876	0	0	2.88293	0	0	76	0	0	67	0	0	23	0	19	55089164	55090676	+	287	MSTRG.102587	MSTRG.102587
MSTRG.102588.1	2.46859	0.45466	0	0.353724	0	1.78293	0.338175	1.9705	0.802304	11	59	30	76	15	0	12	0	62	19	55089474	55091021	+	325	MSTRG.102588	MSTRG.102588
MSTRG.102598.1	0.118547	0	0	0	1.5353	0	0	1.13133	0	0	44	0	5	0	0	0	57	0	19	55171355	55172912	-	420	MSTRG.102598	MSTRG.102598
MSTRG.1026.1	0.270362	0	0	0.627995	2.06115	0	0	0	0.373336	0	0	14	9	0	0	20	57	0	1	18057934	18059309	+	316	MSTRG.1026	MSTRG.1026
MSTRG.1026.2	0.270362	0	0.614568	0.567894	1.58807	0	0	0	0.475649	0	0	18	9	0	20	18	44	0	1	18057934	18059309	+	316	MSTRG.1026	MSTRG.1026
MSTRG.102602.10	1.21796	0	2.72691	0	0.998705	0	0	0	1.85065	0	0	117	64	0	149	0	49	0	19	55239548	55241340	+	555	MSTRG.102602	MSTRG.102602
MSTRG.102602.11	0.154382	0	0	0.436711	0	0	0	0	0	0	0	0	7	0	0	20	0	0	19	55239661	55241340	+	442	MSTRG.102602	MSTRG.102602
MSTRG.102602.7	0	0.041275	0	0	0	0	0.600469	0	0	44	0	0	0	4	0	0	0	0	19	55224721	55226144	+	765	MSTRG.102602	MSTRG.102602
MSTRG.102603.1	0.907627	1.94662	0.593082	0	0.442709	0	0	0	0	0	0	0	28	60	19	0	13	0	19	55239177	55240730	+	316	MSTRG.102603	MSTRG.102603
MSTRG.102604.1	0	0	1.96482	0	0.532617	0	0	0	0	0	0	0	0	0	69	0	17	0	19	55241803	55243436	+	356	MSTRG.102604	MSTRG.102604
MSTRG.102604.2	0	0	0	0	0.43825	2.58366	0	0	0	0	0	0	0	0	0	0	14	95	19	55241937	55243436	+	347	MSTRG.102604	MSTRG.102604
MSTRG.102616.1	0	1.75107	0.018391	0	0	1.0685	0	0	0	0	0	0	0	65	1	0	0	44	19	55332995	55334761	-	384	MSTRG.102616	MSTRG.102616
MSTRG.102617.1	0.96052	0	0.154887	0	3.29785	0	0	4.22676	0	0	141	0	33	0	6	0	105	0	19	55336501	55337880	-	363	MSTRG.102617	MSTRG.102617
MSTRG.10266.1	0	0	0	1.44266	0	0	0	0	0	0	0	0	0	0	0	60	0	0	1	121417800	121419252	-	414	MSTRG.10266	MSTRG.10266
MSTRG.102666.21	1.24507	1.30948	3.38898	0.864145	2.49728	0	0.829932	1.1774	0	47	64	0	70	75	197	52	129	0	19	55583533	55590907	+	592	MSTRG.102666	MSTRG.102666
MSTRG.102666.27	3.38555	0	0	0.742195	0.982752	0	1.64787	3.47185	0	269	551	0	552	0	0	128	149	0	19	55584380	55591808	+	1729	MSTRG.102666	MSTRG.102666
MSTRG.102666.28	0.820948	0	0.450179	0.11049	0.193498	0.763651	0	0	0	0	0	0	134	0	77	20	30	140	19	55584380	55591808	+	1730	MSTRG.102666	MSTRG.102666
MSTRG.102667.1	0	0	0.878464	0	0.498082	0	0	0	0	0	0	0	0	0	25	0	13	0	19	55577495	55579383	-	287	MSTRG.102667	MSTRG.102667
MSTRG.102667.2	0	0	0.795573	0	0.232438	0	0	0	0	0	0	0	0	0	23	0	6	0	19	55578613	55579383	-	287	MSTRG.102667	MSTRG.102667
MSTRG.102668.1	0.532058	0.710529	0	0.720178	1.31953	0	0.856945	5.67667	3.76198	30	192	158	19	26	0	27	43	0	19	55579990	55580908	+	369	MSTRG.102668	MSTRG.102668
MSTRG.102669.1	1.57081	1.69729	0.281443	1.99223	2.58468	0.404739	0.87986	3.28111	0.379061	38	138	20	68	75	13	91	103	20	19	55587168	55593032	+	456	MSTRG.102669	MSTRG.102669
MSTRG.102670.1	1.50561	0.604492	0	1.48982	2.78116	0.130111	0	1.64611	0.345947	0	192	50	180	74	0	189	308	18	19	55593873	55596262	+	1268	MSTRG.102670	MSTRG.102670
MSTRG.102671.1	5.46075	1.29624	2.35826	0.500195	2.8483	0.348219	0.714225	1.38481	0	73	137	0	552	134	249	54	267	40	19	55605609	55607816	+	1072	MSTRG.102671	MSTRG.102671
MSTRG.102671.2	1.25216	0.03595	0	0	0	0	0	0.073421	0	0	3	0	51	2	0	0	0	0	19	55605609	55607175	+	430	MSTRG.102671	MSTRG.102671
MSTRG.102671.3	2.0128	0.722248	0	0.699807	0.386155	0	1.46558	1.05615	0	40	28	0	55	20	0	21	10	0	19	55605615	55607038	+	287	MSTRG.102671	MSTRG.102671
MSTRG.102683.1	0.396869	0	0	0	0	0	0	0	0	0	0	0	31	0	0	0	0	0	19	55666967	55667883	+	824	MSTRG.102683	MSTRG.102683
MSTRG.102686.1	0	4.51366	0	0	0	0	0	0	0	0	0	0	0	141	0	0	0	0	19	55673850	55680100	-	324	MSTRG.102686	MSTRG.102686
MSTRG.102691.15	0	0	0	0.169784	0.109075	0	0.463568	0.35796	0.620396	16	12	26	0	0	0	7	4	0	19	56030956	56032360	+	363	MSTRG.102691	MSTRG.102691
MSTRG.102691.16	0	0	0	0.444637	0.364433	0	0	0	0	0	0	0	0	0	0	37	27	0	19	56031289	56033159	+	822	MSTRG.102691	MSTRG.102691
MSTRG.102691.17	1.10869	0.091946	0.312441	0.88034	0.681561	0.46811	0	0.431343	0.155652	0	132	59	349	30	103	293	199	165	19	56031481	56035860	+	3336	MSTRG.102691	MSTRG.102691
MSTRG.102691.18	0	1.723	1.16467	0.437236	0.356796	0.273818	0.305959	0.313784	0.215336	95	95	81	0	547	377	144	103	96	19	56031528	56035860	+	3289	MSTRG.102691	MSTRG.102691
MSTRG.102692.1	0.429826	0	0	0.959039	1.59053	0	0	0	0	0	0	0	11	0	0	25	36	0	19	55944830	55945129	+	258	MSTRG.102692	MSTRG.102692
MSTRG.102693.2	0	1.83553	0	0.240249	0.211643	0	0.503156	1.0872	0	13	27	0	0	48	0	7	6	0	19	55951898	55953306	+	271	MSTRG.102693	MSTRG.102693
MSTRG.102694.1	2.50143	2.01701	3.26586	0	3.47568	2.17603	4.73857	0	0	234	0	0	124	102	168	0	159	121	19	55952548	55954209	+	523	MSTRG.102694	MSTRG.102694
MSTRG.102695.1	1.49014	0.750624	1.19183	0.398125	0.11167	0	1.25406	0.141658	0	98	11	0	117	61	98	33	9	0	19	55983524	55984380	+	830	MSTRG.102695	MSTRG.102695
MSTRG.102696.1	0.039768	0.895116	0.485955	0	0	2.19394	2.22647	0	0	66	0	0	2	27	15	0	0	73	19	55985431	55986872	+	313	MSTRG.102696	MSTRG.102696
MSTRG.102697.1	3.14787	0	0.758584	0.729704	0	0	0	0	0	0	0	0	134	0	34	33	0	0	19	55988589	55989561	+	449	MSTRG.102697	MSTRG.102697
MSTRG.102698.1	0.889815	0	0.970365	0	0	0	0	0	1.21157	0	0	42	26	0	29	0	0	0	19	55989666	55991168	+	300	MSTRG.102698	MSTRG.102698
MSTRG.102699.1	1.42367	0.5865	0.546323	0.229674	0.640716	2.1614	0.592021	1.63105	0.431859	43	113	37	102	43	41	18	43	173	19	55992112	55993887	+	755	MSTRG.102699	MSTRG.102699
MSTRG.102699.2	0.393408	0.042561	0.414742	0.205131	0.826705	0.074256	0	0.486021	0	0	14	0	11	2	12	6	22	3	19	55992570	55993887	+	293	MSTRG.102699	MSTRG.102699
MSTRG.102700.1	0.026092	0	0	1.25985	0.114339	0	0	0	0.850964	0	0	40	2	0	0	52	5	0	19	56010153	56011439	+	412	MSTRG.102700	MSTRG.102700
MSTRG.102701.1	0.585763	2.09817	1.19174	2.09974	0.791304	0	1.45891	2.59891	0	56	96	0	23	82	48	85	28	0	19	56011638	56013081	+	403	MSTRG.102701	MSTRG.102701
MSTRG.102701.2	0	0	0.430627	0.001168	0	0	0	0	0	0	0	0	0	0	16	1	0	0	19	56011664	56013081	+	371	MSTRG.102701	MSTRG.102701
MSTRG.102703.1	2.12847	2.40595	2.08129	1.08456	3.72096	0.911048	0	0.885906	0.289424	0	55	22	135	156	137	73	218	65	19	56024068	56025934	+	670	MSTRG.102703	MSTRG.102703
MSTRG.102709.1	0	0	0.098609	0	0	0	1.36806	0	0	30	0	0	0	0	3	0	0	0	19	56062371	56063860	-	230	MSTRG.102709	MSTRG.102709
MSTRG.102715.1	0.68923	1.79953	0.495222	0.461644	0.485377	0	3.10123	1.56811	0.601188	201	99	47	45	120	34	32	30	0	19	56107265	56109077	-	688	MSTRG.102715	MSTRG.102715
MSTRG.102715.2	0.501694	1.78379	0.296734	0	0.272992	0	1.17797	1.0152	0.29972	76	64	24	33	118	20	0	17	0	19	56107266	56109077	-	685	MSTRG.102715	MSTRG.102715
MSTRG.102716.1	0.542847	0	0	0	0.299215	0	0	2.31541	0.522787	0	120	34	29	0	0	0	15	0	19	56116443	56118183	-	561	MSTRG.102716	MSTRG.102716
MSTRG.102719.1	0	0	0	0	0	0	0	0	2.5934	0	0	68	0	0	0	0	0	0	19	56128546	56129541	+	231	MSTRG.102719	MSTRG.102719
MSTRG.102720.1	1.65029	0.148018	0	0	0	0	0	0	0	0	0	0	105	10	0	0	0	0	19	56133160	56135220	+	673	MSTRG.102720	MSTRG.102720
MSTRG.102721.1	0	0	0	0	0	0	0	7.77943	0	0	194	0	0	0	0	0	0	0	19	56148048	56149250	+	271	MSTRG.102721	MSTRG.102721
MSTRG.102724.1	0	0	0	0	0	0	3.40014	0	0	85	0	0	0	0	0	0	0	0	19	56193399	56194374	+	265	MSTRG.102724	MSTRG.102724
MSTRG.102727.1	0.435937	1.84793	1.29766	0.536014	0.533728	0	0	2.65299	0	0	223	0	38	163	117	49	43	0	19	56304631	56306124	+	915	MSTRG.102727	MSTRG.102727
MSTRG.102728.1	0	0	0	0	0	0	0	4.11988	0	0	138	0	0	0	0	0	0	0	19	56307876	56309323	+	365	MSTRG.102728	MSTRG.102728
MSTRG.102729.1	1.99532	0	0	0	0	0	1.12534	6.90733	0.966367	30	179	31	54	0	0	0	0	0	19	56308249	56309615	+	282	MSTRG.102729	MSTRG.102729
MSTRG.102730.1	0	0	0	0	0	4.15068	0	0	0	0	0	0	0	0	0	0	0	99	19	56370587	56372109	+	224	MSTRG.102730	MSTRG.102730
MSTRG.102731.1	0	0	0	0.061646	0	0	0	3.20134	0	0	61	0	0	0	0	2	0	0	19	56416464	56417961	+	206	MSTRG.102731	MSTRG.102731
MSTRG.102732.1	0	0	1.80787	0	0	0	0	0	0	0	0	0	0	0	51	0	0	0	19	56417068	56418641	+	282	MSTRG.102732	MSTRG.102732
MSTRG.102734.1	0.43629	2.90782	0	0	0	0	0	0	0	0	0	0	13	83	0	0	0	0	19	56424654	56426135	+	296	MSTRG.102734	MSTRG.102734
MSTRG.102735.1	0.026549	0.012771	0.620952	0.399791	0	0	0	0	1.25233	0	0	47	1	1	20	13	0	0	19	56424947	56426457	+	325	MSTRG.102735	MSTRG.102735
MSTRG.102736.1	1.65407	0	0	0	0	0	0	0	0	0	0	0	107	0	0	0	0	0	19	56427460	56429360	+	686	MSTRG.102736	MSTRG.102736
MSTRG.102741.1	0	0	0	0	0.270638	0	0	0	0	0	0	0	0	0	0	0	8	0	19	56447022	56447996	-	312	MSTRG.102741	MSTRG.102741
MSTRG.102746.1	0	0	0	0	0	0	3.37797	0	0	84	0	0	0	0	0	0	0	0	19	56452342	56453071	-	262	MSTRG.102746	MSTRG.102746
MSTRG.102753.1	1.98027	0	0	0	0	0	0	0	0	0	0	0	51	0	0	0	0	0	19	56459380	56460902	+	270	MSTRG.102753	MSTRG.102753
MSTRG.102755.1	0	0	1.91887	0	0	0	0	0	0	0	0	0	0	0	46	0	0	0	19	56460605	56463230	-	239	MSTRG.102755	MSTRG.102755
MSTRG.102755.2	0	0	1.89471	0	0	0	0	0	0	0	0	0	0	0	45	0	0	0	19	56461847	56463230	-	239	MSTRG.102755	MSTRG.102755
MSTRG.102759.1	0	0	0	0	0	0	0	2.61928	0	0	61	0	0	0	0	0	0	0	19	56480832	56482017	-	254	MSTRG.102759	MSTRG.102759
MSTRG.102760.1	0	1.67938	0	0	2.33325	0	0	0	0	0	0	0	0	78	0	0	98	0	19	56483530	56485202	-	478	MSTRG.102760	MSTRG.102760
MSTRG.102761.1	0	0	1.87491	0	0	0	2.02706	0	0	41	0	0	0	0	39	0	0	0	19	56507957	56509294	-	211	MSTRG.102761	MSTRG.102761
MSTRG.102762.1	0	0	0.221805	0	0	0	0	2.2657	0	0	73	0	0	0	8	0	0	0	19	56525262	56526798	-	349	MSTRG.102762	MSTRG.102762
MSTRG.102763.1	0	0	0.730504	0	0	0	0	0.146143	2.86564	0	4	84	0	0	19	0	0	0	19	56527631	56528840	-	258	MSTRG.102763	MSTRG.102763
MSTRG.102763.2	0	0	0.12956	0	0	0	0	4.53421	0.013187	0	107	1	0	0	4	0	0	0	19	56527788	56528995	-	256	MSTRG.102763	MSTRG.102763
MSTRG.102764.1	0	1.93972	0	0.808517	1.25675	0	0	0	0	0	0	0	0	53	0	23	31	0	19	56557585	56558496	-	279	MSTRG.102764	MSTRG.102764
MSTRG.102765.1	0	0.777018	1.68385	0	0	0	0	2.27389	0	0	71	0	0	26	56	0	0	0	19	56579140	56580398	-	336	MSTRG.102765	MSTRG.102765
MSTRG.102766.1	0	1.03193	0	0	2.42073	0.011589	0	0	1.37358	0	0	68	0	44	0	0	92	1	19	56582545	56583011	-	434	MSTRG.102766	MSTRG.102766
MSTRG.102766.2	0	0	0	0	0	1.06255	0	0	0.009409	0	0	1	0	0	0	0	0	46	19	56582568	56583011	-	409	MSTRG.102766	MSTRG.102766
MSTRG.102767.1	0	0	0	0.85491	0	0	0.084473	1.77848	0	3	47	0	0	0	0	25	0	0	19	56588943	56590495	-	287	MSTRG.102767	MSTRG.102767
MSTRG.102767.2	0	0	0	1.0734	0	0	1.48201	0.09597	0.680725	40	3	22	0	0	0	31	0	0	19	56588946	56590495	-	284	MSTRG.102767	MSTRG.102767
MSTRG.102768.1	0	0	0	0	3.05895	0	0	0	0	0	0	0	0	0	0	0	64	0	19	56589740	56591249	-	237	MSTRG.102768	MSTRG.102768
MSTRG.102792.1	0	0	0	0	1.79961	1.62697	0	0	0	0	0	0	0	0	0	0	61	67	19	57018041	57019545	-	385	MSTRG.102792	MSTRG.102792
MSTRG.102793.1	0	0	0	0	0	4.84465	0	0	2.20478	0	0	111	0	0	0	0	0	227	19	57018693	57020257	-	442	MSTRG.102793	MSTRG.102793
MSTRG.102796.1	0	2.49041	0	0	0	0	0	0	0	0	0	0	0	61	0	0	0	0	19	57025578	57026771	-	254	MSTRG.102796	MSTRG.102796
MSTRG.102797.1	0.722982	0.44625	0.734208	0	0	0.975647	0	0	2.32258	0	0	89	24	15	25	0	0	35	19	57025938	57027214	-	338	MSTRG.102797	MSTRG.102797
MSTRG.102797.2	0.421751	1.56399	0.348655	0	0	0.350445	1.43211	0	0.214481	77	0	14	23	87	20	0	0	22	19	57026022	57028507	-	571	MSTRG.102797	MSTRG.102797
MSTRG.102797.3	0.022089	0.00392	0.028216	0	0	0.373493	0	0	0	0	0	0	1	1	1	0	0	11	19	57026022	57027214	-	254	MSTRG.102797	MSTRG.102797
MSTRG.102799.1	3.12572	2.72362	2.65779	5.13354	2.34418	1.2623	3.94616	4.69936	1.50466	394	456	181	313	278	277	543	217	142	19	57031740	57042496	-	1059	MSTRG.102799	MSTRG.102799
MSTRG.102801.1	0	0	0	0	0	2.96183	0	0	0	0	0	0	0	0	0	0	0	105	19	57043929	57044965	-	335	MSTRG.102801	MSTRG.102801
MSTRG.102804.1	0.74101	0.517041	0.459583	0	0	0.304666	0	2.91031	0	0	78	0	21	15	14	0	0	10	19	57070733	57071860	-	289	MSTRG.102804	MSTRG.102804
MSTRG.102805.1	1.56817	1.27862	1.3229	0.025043	0	0.588605	0.634753	0.057673	0.804462	72	7	110	178	148	156	4	0	75	19	57078143	57079380	-	1201	MSTRG.102805	MSTRG.102805
MSTRG.102806.1	0.678773	1.38025	0.745013	1.02804	1.19999	1.46931	1.16779	0.356822	0	124	37	0	73	151	83	116	119	175	19	57083665	57087548	+	1128	MSTRG.102806	MSTRG.102806
MSTRG.102807.1	1.7101	2.20047	1.96921	0.819691	2.32633	0.234474	1.14201	0.806867	0.585843	128	88	79	191	251	229	97	240	30	19	57084215	57086305	+	1182	MSTRG.102807	MSTRG.102807
MSTRG.102807.2	0.033798	0	1.26516	0	0.021175	0.383926	0	0.185899	0	0	8	0	2	0	58	0	1	19	19	57084936	57086305	+	461	MSTRG.102807	MSTRG.102807
MSTRG.102813.1	0	0.856352	1.09195	0	0	0	1.07651	0	0	22	0	0	0	18	23	0	0	0	19	57094464	57095785	+	211	MSTRG.102813	MSTRG.102813
MSTRG.102819.1	0.22633	0	3.12356	0	0	0.914845	1.77829	0.979957	0	48	26	0	6	0	87	0	0	28	19	57125151	57128845	+	281	MSTRG.102819	MSTRG.102819
MSTRG.102819.2	0.302733	0	0	0	0	0	2.30125	1.55704	0	47	31	0	7	0	0	0	0	0	19	57126047	57128845	+	213	MSTRG.102819	MSTRG.102819
MSTRG.102821.2	0.132883	0	0	0	0	0	0	0	1.38396	0	0	53	5	0	0	0	0	0	19	57133718	57136362	+	334	MSTRG.102821	MSTRG.102821
MSTRG.102826.1	0	0	0	0	0	1.92448	0	0	0	0	0	0	0	0	0	0	0	50	19	57134466	57135915	+	244	MSTRG.102826	MSTRG.102826
MSTRG.102826.2	1.95858	0	0	1.50971	0	0	0.923133	0	0	28	0	0	58	0	0	48	0	0	19	57135467	57136989	+	313	MSTRG.102826	MSTRG.102826
MSTRG.102829.1	0	0.465988	0	0.326485	0	0	0	3.63788	0	0	90	0	0	13	0	9	0	0	19	57137531	57139016	+	269	MSTRG.102829	MSTRG.102829
MSTRG.102830.1	1.16773	0	0	0	0	0	0	0	0	0	0	0	36	0	0	0	0	0	19	57137861	57139398	+	321	MSTRG.102830	MSTRG.102830
MSTRG.102841.1	1.62501	0.751037	0.692779	1.03047	1.82891	1.6455	0.823111	1.14627	0.595364	195	264	170	385	182	171	258	401	436	19	57211528	57215286	-	2510	MSTRG.102841	MSTRG.102841
MSTRG.102843.7	0	4.20802	0.853685	4.25764	2.78639	0	2.31131	0.626347	0	137	36	0	0	255	53	267	153	0	19	57260453	57262080	-	627	MSTRG.102843	MSTRG.102843
MSTRG.102844.1	0.373381	0.893771	0	0	2.02206	0	0.786406	0	0	22	0	0	11	25	0	0	51	0	19	57224671	57226118	-	285	MSTRG.102844	MSTRG.102844
MSTRG.102844.2	1.75213	0	0.424075	0.377196	0.849647	0	0	0	0	0	0	0	131	0	33	30	59	0	19	57224671	57226623	-	791	MSTRG.102844	MSTRG.102844
MSTRG.102845.1	1.46265	3.75137	0.320469	0	1.88458	0	0	0	3.56921	0	0	123	42	110	10	0	50	0	19	57243005	57244538	-	303	MSTRG.102845	MSTRG.102845
MSTRG.102846.1	0.513681	0	0	0	1.48034	1.02666	1.04213	0	0	35	0	0	18	0	0	0	46	39	19	57271765	57273305	-	354	MSTRG.102846	MSTRG.102846
MSTRG.102847.1	0.802032	0.670089	0.530275	1.76508	1.47688	0	0.242709	0	0	19	0	0	61	53	42	142	104	0	19	57278092	57279763	-	806	MSTRG.102847	MSTRG.102847
MSTRG.102847.2	1.04248	1.59023	0	0.640608	1.76317	0	0	1.98057	0	0	58	0	32	49	0	21	49	0	19	57278206	57279394	-	316	MSTRG.102847	MSTRG.102847
MSTRG.102847.3	0.090773	0.199885	2.44884	0.311854	0.893124	0	1.0472	0	0	44	0	0	4	9	106	14	35	0	19	57278461	57279763	-	437	MSTRG.102847	MSTRG.102847
MSTRG.102848.1	0.258392	0.328222	0.996561	1.35539	0	0	1.32112	0.603399	0.541463	127	57	63	25	33	100	138	0	0	19	57289735	57291786	-	1018	MSTRG.102848	MSTRG.102848
MSTRG.102849.1	1.07538	0	0	0	0.188363	0	0	0.965833	0	0	67	0	77	0	0	0	13	0	19	57300223	57301921	-	750	MSTRG.102849	MSTRG.102849
MSTRG.102850.1	0.211474	1.09593	0.77627	0	0.357481	0	2.10273	1.57383	0.838286	101	74	49	11	54	39	0	16	0	19	57302707	57309161	-	507	MSTRG.102850	MSTRG.102850
MSTRG.102851.1	0	0	0	0	1.52947	0	4.61184	0	3.25257	107	0	91	0	0	0	0	33	0	19	57303684	57310021	-	246	MSTRG.102851	MSTRG.102851
MSTRG.102852.1	0.621741	3.43814	1.20845	0	0.883984	0	0.441826	0	0	18	0	0	25	137	49	0	32	0	19	57305443	57306911	-	413	MSTRG.102852	MSTRG.102852
MSTRG.102853.1	0.884096	1.40311	0	1.75715	0	0.772663	0	3.44331	0	0	85	0	23	37	0	48	0	22	19	57340056	57341005	-	269	MSTRG.102853	MSTRG.102853
MSTRG.102857.2	0	0	0.19244	0	0.005479	0	0.585086	3.69218	0.816289	19	114	31	0	0	7	0	1	0	19	57415358	57416881	-	335	MSTRG.102857	MSTRG.102857
MSTRG.102858.1	1.77996	2.60509	1.13522	0	1.73477	0.486648	0	0.075687	0	0	3	0	51	75	34	0	46	16	19	57370501	57371426	-	298	MSTRG.102858	MSTRG.102858
MSTRG.102859.1	0	0	0	0	0	0	0	1.60067	0	0	41	0	0	0	0	0	0	0	19	57401681	57403081	-	279	MSTRG.102859	MSTRG.102859
MSTRG.102860.1	0.999915	0	2.87997	0.969738	0.76955	0	0	1.69022	0	0	67	0	41	0	122	42	29	0	19	57408711	57410071	-	429	MSTRG.102860	MSTRG.102860
MSTRG.102861.1	0	0	0	0.339004	0	0	0	1.86766	0	0	57	0	0	0	0	12	0	0	19	57423750	57425214	-	333	MSTRG.102861	MSTRG.102861
MSTRG.102862.1	0	4.27661	0	0	0	0	0	2.99519	0	0	84	0	0	127	0	0	0	0	19	57426029	57427278	-	306	MSTRG.102862	MSTRG.102862
MSTRG.102863.1	0	2.56935	0	2.40086	0	0	0	0	0	0	0	0	0	163	0	157	0	0	19	57428037	57430966	-	655	MSTRG.102863	MSTRG.102863
MSTRG.102863.2	2.58403	0.551375	3.13663	2.02336	1.50262	1.20539	3.25612	0.125299	0.157637	201	8	12	160	35	202	133	86	84	19	57428037	57430966	-	655	MSTRG.102863	MSTRG.102863
MSTRG.102864.2	1.95939	2.06169	0.177855	0.423303	0	0	0.288649	0.679401	0.328118	21	48	29	141	151	14	33	0	0	19	57442201	57444031	-	759	MSTRG.102864	MSTRG.102864
MSTRG.102865.1	0	1.29041	1.97867	0	0	0	0	5.23855	0	0	121	0	0	32	49	0	0	0	19	57435486	57437699	-	251	MSTRG.102865	MSTRG.102865
MSTRG.102866.1	0.392594	0.558993	0	0	2.4912	0	2.95538	0.759563	0	90	23	0	12	18	0	0	71	0	19	57442974	57444367	-	323	MSTRG.102866	MSTRG.102866
MSTRG.102870.1	0.733821	1.54563	1.00416	0.770636	0.519621	0	0	0.925977	0.456273	0	56	34	45	97	64	50	30	0	19	57538105	57539596	-	649	MSTRG.102870	MSTRG.102870
MSTRG.102870.2	0.032232	0.273378	0.137014	0	0.109531	0	0	0	0.01002	0	0	1	2	17	9	0	6	0	19	57538140	57539596	-	614	MSTRG.102870	MSTRG.102870
MSTRG.102870.5	0.082006	0	0	0.03672	0.017557	0	0.902638	0	0	37	0	0	4	0	0	2	1	0	19	57538692	57539966	-	435	MSTRG.102870	MSTRG.102870
MSTRG.102871.1	0	0	1.99476	0.500391	1.8691	0	2.40843	0	0	60	0	0	0	0	52	14	43	0	19	57547776	57548614	-	263	MSTRG.102871	MSTRG.102871
MSTRG.102871.2	3.50083	1.50441	1.39814	1.34671	1.64133	1.63006	0.410058	4.9308	0.772506	25	291	57	213	94	89	87	93	111	19	57548203	57549423	-	644	MSTRG.102871	MSTRG.102871
MSTRG.102872.1	1.71099	0.899583	1.19879	0.421581	1.42404	2.54967	0.339139	0.748601	0	13	26	0	61	33	45	16	47	102	19	57565191	57566246	-	376	MSTRG.102872	MSTRG.102872
MSTRG.102872.2	1.41195	0.173254	0	0.075386	2.80695	0.513165	1.72743	0.193809	0.190196	112	13	15	91	12	0	6	168	37	19	57565301	57566662	-	683	MSTRG.102872	MSTRG.102872
MSTRG.102873.1	0.518022	0.429605	1.12729	1.7952	0.434594	0.302896	0	1.76652	1.85584	0	173	225	53	45	118	191	41	35	19	57595824	57598080	-	1066	MSTRG.102873	MSTRG.102873
MSTRG.102879.1	0.999588	0.864276	2.455	1.0599	0.495408	0	1.30528	0.580565	0	48	21	0	37	33	94	42	17	0	19	57703748	57705119	+	389	MSTRG.102879	MSTRG.102879
MSTRG.102880.1	0.830913	0.700299	0	1.51556	0.189383	0	0.86763	0	0	32	0	0	30	26	0	58	7	0	19	57711606	57713605	+	382	MSTRG.102880	MSTRG.102880
MSTRG.102880.2	0	0.953319	0	0	0	0	1.42193	0	0	35	0	0	0	24	0	0	0	0	19	57711728	57713605	+	260	MSTRG.102880	MSTRG.102880
MSTRG.102881.1	0.139822	0	0.555717	0.677593	0	0	0.376572	2.39933	0	13	77	0	5	0	19	24	0	0	19	57717025	57718212	+	348	MSTRG.102881	MSTRG.102881
MSTRG.102882.1	1.16738	0.694605	1.76327	0.958637	0.57225	0.378975	0	0	0	0	0	0	27	17	43	24	13	10	19	57736300	57737393	+	245	MSTRG.102882	MSTRG.102882
MSTRG.102883.1	1.5195	0	4.42363	0	0.073289	0	0	0.338778	0.655194	0	9	22	42	0	126	0	2	0	19	57738157	57739532	+	288	MSTRG.102883	MSTRG.102883
MSTRG.102884.1	2.58746	0.853786	1.98908	0.670475	1.05155	2.26752	0.724505	1.37739	1.28601	35	65	75	125	42	100	35	47	122	19	57738806	57740403	+	509	MSTRG.102884	MSTRG.102884
MSTRG.102885.1	4.34008	1.96428	0.790658	1.49166	0	1.09782	1.54067	2.21223	0	53	74	0	150	70	29	55	0	43	19	57740436	57741170	+	365	MSTRG.102885	MSTRG.102885
MSTRG.102888.1	0	4.56576	0	0	0	0	0	0	0	0	0	0	0	125	0	0	0	0	19	57769157	57770287	+	284	MSTRG.102888	MSTRG.102888
MSTRG.102890.1	0	0	1.30662	0	0	0	0	0	0	0	0	0	0	0	84	0	0	0	19	57777715	57778483	-	648	MSTRG.102890	MSTRG.102890
MSTRG.102892.8	0	0	0	0	0	1.52719	0	0	0	0	0	0	0	0	0	0	0	79	19	58046871	58048392	+	485	MSTRG.102892	MSTRG.102892
MSTRG.102893.1	0	2.66557	0	1.79179	0	0	0	2.98621	0	0	133	0	0	125	0	87	0	0	19	57796932	57798552	+	485	MSTRG.102893	MSTRG.102893
MSTRG.102894.1	0	0.95175	0	0	0	0	0	5.14459	0	0	106	0	0	21	0	0	0	0	19	57800977	57802132	+	223	MSTRG.102894	MSTRG.102894
MSTRG.102895.1	1.22514	0	0	0.383131	2.15752	0	0.131075	0	0	4	0	0	30	0	0	10	48	0	19	57812710	57814286	+	254	MSTRG.102895	MSTRG.102895
MSTRG.102896.1	0	2.50628	0	0.755518	0	0	0	1.21126	0.916472	0	56	52	0	121	0	38	0	0	19	57830747	57832485	+	497	MSTRG.102896	MSTRG.102896
MSTRG.102897.1	0	1.71414	0	0	1.60404	0	0	0.234924	0	0	9	0	0	67	0	0	57	0	19	57884252	57885177	+	402	MSTRG.102897	MSTRG.102897
MSTRG.102898.1	0.429654	0.45663	1.24857	0.906136	0.356676	0	0	0.987261	0	0	46	0	21	23	63	46	16	0	19	57893065	57893603	+	506	MSTRG.102898	MSTRG.102898
MSTRG.102899.1	0	0.722194	1.70579	0	0	0	0	3.01618	0	0	90	0	0	23	55	0	0	0	19	57947521	57948655	+	323	MSTRG.102899	MSTRG.102899
MSTRG.102900.1	0	0	0	0	0	0.797652	0.369986	0.986534	0	18	45	0	0	0	0	0	0	42	19	57964166	57966199	+	490	MSTRG.102900	MSTRG.102900
MSTRG.102902.1	1.83882	0	0	0	0	0	1.44258	0	0	38	0	0	48	0	0	0	0	0	19	58072916	58074953	+	274	MSTRG.102902	MSTRG.102902
MSTRG.102903.1	0	0	0	0	0	0	1.6109	0.119836	0	39	3	0	0	0	0	0	0	0	19	58091956	58092813	+	255	MSTRG.102903	MSTRG.102903
MSTRG.102905.1	1.06182	2.70399	2.28618	1.98411	1.27951	1.17613	2.09225	0	0.634946	246	0	90	125	325	280	247	140	155	19	58127031	58130263	+	1247	MSTRG.102905	MSTRG.102905
MSTRG.102908.1	1.50472	1.13939	0.928563	0.840618	1.1998	0.475756	1.38264	0.689242	1.3927	581	282	705	634	491	407	375	467	225	19	58159886	58165425	+	4464	MSTRG.102908	MSTRG.102908
MSTRG.102909.1	0	2.32297	0	0	1.59879	0	0	0	1.28481	0	0	52	0	79	0	0	50	0	19	58173109	58174740	+	352	MSTRG.102909	MSTRG.102909
MSTRG.102909.2	0	0	2.85855	0	1.2217	0	0	0	0.892087	0	0	30	0	0	81	0	31	0	19	58173173	58174740	+	288	MSTRG.102909	MSTRG.102909
MSTRG.102910.1	1.71814	0.223322	0.852964	1.61963	1.70335	1.31334	0.127956	0.445469	0.425096	27	89	105	352	47	182	351	323	301	19	58183156	58186560	+	2169	MSTRG.102910	MSTRG.102910
MSTRG.102910.2	0	0	0	0	0.394817	0	0	0	0	0	0	0	0	0	0	0	53	0	19	58183785	58186560	+	1539	MSTRG.102910	MSTRG.102910
MSTRG.102911.1	3.2336	0.60178	3.2387	0.983045	0.722664	0.346789	2.6413	4.00569	0	221	326	0	271	52	283	87	56	33	19	58187415	58190446	+	887	MSTRG.102911	MSTRG.102911
MSTRG.102912.1	0	0	0.829796	0	0.10629	1.01562	0	0	0	0	0	0	0	0	46	0	6	60	19	58208319	58209476	+	554	MSTRG.102912	MSTRG.102912
MSTRG.102913.1	0.273907	1.03065	3.32008	1.44449	1.36033	1.43732	0.576166	0	0.780376	49	0	80	24	90	293	130	107	137	19	58209485	58210950	+	897	MSTRG.102913	MSTRG.102913
MSTRG.102914.1	1.94653	1.09645	0.711009	1.31133	0.318797	1.19738	0.625575	1.90688	1.00765	77	228	149	240	138	92	171	37	165	19	58212525	58214401	+	1304	MSTRG.102914	MSTRG.102914
MSTRG.102915.1	0	1.4252	1.99767	0	2.71165	0.949346	1.70491	0	0	123	0	0	0	105	150	0	180	77	19	58217927	58218711	+	761	MSTRG.102915	MSTRG.102915
MSTRG.102916.1	2.04402	0.41312	2.07883	0.789929	0.837171	0	1.52946	2.3788	0	82	124	0	110	23	116	45	42	0	19	58229192	58230695	+	568	MSTRG.102916	MSTRG.102916
MSTRG.102917.1	1.65905	0.454573	1.74581	1.81159	3.08194	0.358071	1.31187	2.06314	1.07053	191	292	187	241	68	265	279	415	59	19	58232047	58234667	+	1541	MSTRG.102917	MSTRG.102917
MSTRG.102917.2	1.5169	0	0	0	0	0	0	0.29399	0	0	26	0	137	0	0	0	0	0	19	58232628	58234667	+	955	MSTRG.102917	MSTRG.102917
MSTRG.102918.1	0.258676	0.551593	2.05617	1.71005	0.963717	0	1.25179	1.16155	0.487905	134	121	63	28	61	229	194	96	0	19	58248689	58249856	+	1133	MSTRG.102918	MSTRG.102918
MSTRG.102919.1	0.900282	1.4552	1.06636	1.96842	0.062322	0	0	0.912563	0.019184	0	47	2	48	79	59	111	4	0	19	58253638	58255479	+	562	MSTRG.102919	MSTRG.102919
MSTRG.102919.2	0	0	0.933438	0.238386	0	0	0	2.17719	0.03018	0	112	2	0	0	52	14	0	0	19	58253641	58255479	+	559	MSTRG.102919	MSTRG.102919
MSTRG.102920.1	0.156337	0.542091	0.184795	0	0	0.430119	0.504655	2.89848	0.557048	48	268	64	15	53	19	0	0	46	19	58254535	58257896	+	1009	MSTRG.102920	MSTRG.102920
MSTRG.102920.2	0.775674	2.88422	3.23317	2.06275	1.66747	0.704957	0	0	0.120891	0	0	12	63	236	270	175	124	64	19	58254535	58256662	+	849	MSTRG.102920	MSTRG.102920
MSTRG.102920.3	0	0.048164	0.080719	0	0	0.077191	0.426161	0	0	14	0	0	0	2	3	0	0	3	19	58255038	58256662	+	348	MSTRG.102920	MSTRG.102920
MSTRG.102920.4	2.762	0	2.9384	0.579712	1.53242	0.640896	1.3679	1.75332	0	165	205	0	332	0	368	74	171	87	19	58257304	58259650	+	1274	MSTRG.102920	MSTRG.102920
MSTRG.102921.1	0.115681	0	0	2.34963	0.612741	0.506377	0	0	0	0	0	0	3	0	0	64	15	15	19	58256776	58258121	+	269	MSTRG.102921	MSTRG.102921
MSTRG.102921.2	0	0	0	0.915984	0.761775	0.894064	0.231772	4.54028	0	7	122	0	0	0	0	27	20	28	19	58256824	58258193	+	293	MSTRG.102921	MSTRG.102921
MSTRG.102922.1	0.095188	0	1.98244	0	0.453071	0	0.272652	0	0	9	0	0	3	0	62	0	13	0	19	58315352	58316846	+	318	MSTRG.102922	MSTRG.102922
MSTRG.102923.1	0	0	0	0	0	0	2.63021	0	0	63	0	0	0	0	0	0	0	0	19	58315733	58317161	+	252	MSTRG.102923	MSTRG.102923
MSTRG.102925.1	0.462104	0	0	0	0	0	1.93735	0	0.63056	60	0	24	15	0	0	0	0	0	19	58328818	58330290	+	326	MSTRG.102925	MSTRG.102925
MSTRG.102926.1	0	0	0	0	2.75305	0	0	0	0	0	0	0	0	0	0	0	60	0	19	58409461	58411024	+	247	MSTRG.102926	MSTRG.102926
[truncated: 82,569 more rows]

## Sheet: Identified CircRNAs
ID	HP1.ReadsCount	HP1.TPM	HP2.ReadsCount	HP2.TPM	HP3.ReadsCount	HP3.TPM	LP1.ReadsCount	LP1.TPM	LP2.ReadsCount	LP2.TPM	LP3.ReadsCount	LP3.TPM	MP1.ReadsCount	MP1.TPM	MP2.ReadsCount	MP2.TPM	MP3.ReadsCount	MP3.TPM
[truncated: 7,375 more rows]
