# Supplementary material for: Whole transcriptomic analysis revealed the effects of different dietary protein levels on the growth and development of Jersey-yak
Source: Research Square preprint supplement (doi:10.21203/rs.3.rs-7466956/v1), 2025-09-30
Supplement: Supplementary file 4 [file 7c60760499df4c366bf8355d.xlsx]

## Sheet: LP vs MP
List of differentially expressed mRNAs(LP vs MP)													List of differentially expressed lncRNAs(LP vs MP)												List of differentially expressed circRNAs(LP vs MP)									List of differentially expressed miRNAs(LP vs MP)
id	Gene_id	Description	baseMean_LP	baseMean_MP	foldChange(MP/LP)	log2FoldChange	pval	padj	Regulation	Chromosome	Length		LncRNA_id	Gene_id	baseMean_LP	baseMean_MP	foldChange(MP/LP)	log2FoldChange	p-val	padj	Regulation	Chromosome	Length		Gene ID	baseMean_LP	baseMean_MP	foldChange(MP/LP)	log2FoldChange	p-val	p-adj	Regulation		id	baseMean	baseMeanA	baseMeanB	foldChange	log2FoldChange	pval	padj	Regulation
ENSBGRG00000010057	PEX16	peroxisomal biogenesis factor 16 [Source:HGNC Symbol;Acc:HGNC:8857]	0	100.699	Inf	Inf	5.89524e-09	8.76976e-05	Up	13	1170		MSTRG.125658.3	MSTRG.125658	0	944.896	Inf	Inf	6.29835e-05	0.11973	Up	21	2207		bgrcirc_006601	648.038	124.034	0.1914	-2.38534	1.71525e-08	0.000109707	Down		bgr-undef-1058	6.97996	1.93442	12.0255	6.21658	2.63612	0.0404038	1	Up
ENSBGRG00000025584	CILP	cartilage intermediate layer protein [Source:HGNC Symbol;Acc:HGNC:1980]	1099.53	2975.85	2.70647	1.43641	1.5918e-05	0.118398	Up	11	3555		MSTRG.168855.1	MSTRG.168855	681.456	0	0	-Inf	0.000153425	0.212594	Down	28	4262		bgrcirc_008970	78.2998	0	0	-Inf	1.9012e-06	0.00608005	Down		bgr-undef-451	4.70359	0.967211	8.43998	8.7261	3.12534	0.0450069	1	Up
ENSBGRG00000023037	CFAP410	cilia and flagella associated protein 410 [Source:HGNC Symbol;Acc:HGNC:1260]	2.27421	84.1866	37.018	5.21015	3.81054e-05	0.156232	Up	1	1091		MSTRG.206228.2	MSTRG.206228	569.259	0	0	-Inf	0.000236711	0.286239	Down	5	1524		bgrcirc_009733	143.448	11.3961	0.0794438	-3.65392	4.01672e-05	0.0856366	Down		bgr-undef-58	12.7675	3.37972	22.1554	6.55539	2.71268	0.0148984	1	Up
ENSBGRG00000020188	SLC16A6	solute carrier family 16 member 6 [Source:HGNC Symbol;Acc:HGNC:10927]	181.045	699.858	3.86566	1.95071	5.20976e-05	0.156232	Up	19	1545		MSTRG.189070.13	MSTRG.189070	0	517.502	Inf	Inf	0.000291813	0.321803	Up	4	2524		bgrcirc_017953	288.812	767.684	2.65808	1.41038	0.000386505	0.446243	Up		bgr-undef-67	12.1223	3.91301	20.3315	5.19587	2.37737	0.00845828	1	Up
ENSBGRG00000019832	C1QTNF1	C1q and TNF related 1 [Source:HGNC Symbol;Acc:HGNC:14324]	8.08573	185.253	22.9111	4.51797	5.25115e-05	0.156232	Up	19	1338		MSTRG.144808.1	MSTRG.144808	478.944	0	0	-Inf	0.000383355	0.36814	Down	24	1468		bgrcirc_015460	46.2653	0	0	-Inf	0.000449539	0.446243	Down		bgr-undef-754	38.4692	16.5746	60.3638	3.64196	1.86471	0.0268269	1	Up
ENSBGRG00000026121	BHLHE40	basic helix-loop-helix family member e40 [Source:HGNC Symbol;Acc:HGNC:1046]	392.148	1078.42	2.75003	1.45945	9.29164e-05	0.230371	Up	22	1239		MSTRG.94533.5	MSTRG.94533	0	445.821	Inf	Inf	0.000428173	0.395009	Up	18	2248		bgrcirc_016423	44.7148	0	0	-Inf	0.000450418	0.446243	Down		bgr-mir-32-2	3.14427	6.28855	0	0	-Inf	0.0433575	1	Down
ENSBGRG00000019094	SPATA25	spermatogenesis associated 25 [Source:HGNC Symbol;Acc:HGNC:16158]	0	46.3159	Inf	Inf	0.000122099	0.259477	Up	12	657		ENSBGRT00000043372	ENSBGRG00000023512	486.955	0	0	-Inf	0.000556441	0.4648	Down	2	4878		bgrcirc_004446	0	46.9902	Inf	Inf	0.000518354	0.446243	Up
ENSBGRG00000020997	GLCE	glucuronic acid epimerase [Source:HGNC Symbol;Acc:HGNC:17855]	999.723	387.261	0.387368	-1.36822	0.000163782	0.304552	Down	11	3083		MSTRG.165686.28	MSTRG.165686	407.461	0	0	-Inf	0.000625684	0.506107	Down	27	3294		bgrcirc_004292	43.8611	0	0	-Inf	0.000558153	0.446243	Down
ENSBGRG00000017871	TNMD	tenomodulin [Source:HGNC Symbol;Acc:HGNC:17757]	89.2265	0	0	-Inf	0.000196642	0.325027	Down	X	951		MSTRG.113994.1	MSTRG.113994	375.914	0	0	-Inf	0.000758083	0.573876	Down	2	566		bgrcirc_000464	76.1906	3.91421	0.0513739	-4.28282	0.000822304	0.584384	Down
ENSBGRG00000007264	TNFSF4	TNF superfamily member 4 [Source:HGNC Symbol;Acc:HGNC:11934]	0	43.3664	Inf	Inf	0.000240825	0.358252	Up	14	549		MSTRG.137503.2	MSTRG.137503	352.458	0	0	-Inf	0.000916034	0.656047	Down	22	1329		bgrcirc_015757	38.1297	0	0	-Inf	0.00140677	0.870083	Down
ENSBGRG00000003430	C1QC	complement C1q C chain [Source:HGNC Symbol;Acc:HGNC:1245]	1.94932	66.2777	34.0004	5.08748	0.000297474	0.36475	Up	2	1849		MSTRG.83036.26	MSTRG.83036	422.611	0.341819	0.000808827	-10.2719	0.00114028	0.7571	Down	17	1007		bgrcirc_008398	66.5169	266.026	3.99938	1.99977	0.00149639	0.870083	Up
ENSBGRG00000000772	COMP	cartilage oligomeric matrix protein [Source:HGNC Symbol;Acc:HGNC:2227]	125.62	0	0	-Inf	0.000308479	0.36475	Down	8	2271		MSTRG.75020.3	MSTRG.75020	0	666.85	Inf	Inf	0.00147953	0.896616	Up	16	4475		bgrcirc_010756	68.0027	3.03081	0.0445689	-4.48782	0.00166291	0.886331	Down
ENSBGRG00000022242	SEMA3A	semaphorin 3A [Source:HGNC Symbol;Acc:HGNC:10723]	45.8503	0	0	-Inf	0.000335764	0.36475	Down	4	3031		MSTRG.217973.1	MSTRG.217973	285.946	0	0	-Inf	0.00150997	0.913146	Down	6	2263		bgrcirc_006720	62.0473	2.29385	0.0369695	-4.75752	0.00201733	0.992528	Down
ENSBGRG00000004152	SLC28A3	solute carrier family 28 member 3 [Source:HGNC Symbol;Acc:HGNC:16484]	41.7871	0	0	-Inf	0.000343271	0.36475	Down	7	2146		MSTRG.171236.2	MSTRG.171236	281.002	0	0	-Inf	0.00170713	0.9796	Down	29	1303		bgrcirc_009099	99.932	9.21454	0.0922081	-3.43896	0.0021883	0.996154	Down
ENSBGRG00000001042	-	glyceraldehyde-3-phosphate dehydrogenase [Source:HGNC Symbol;Acc:HGNC:4141]	26644.3	54077.1	2.0296	1.02119	0.000406795	0.403432	Up	5	1115		MSTRG.212619.3	MSTRG.212619	0	268.34	Inf	Inf	0.00177646	1	Up	5	2084		bgrcirc_010896	34.2796	0	0	-Inf	0.00272405	0.996154	Down
ENSBGRG00000014185	-	-	88.7505	0	0	-Inf	0.000436172	0.40553	Down	8	1545		MSTRG.189518.2	MSTRG.189518	5.7266	1089.95	190.331	7.57237	0.00219329	1	Up	4	2004		bgrcirc_015711	34.4574	0	0	-Inf	0.00312038	0.996154	Down
ENSBGRG00000000308	CD48	CD48 molecule [Source:HGNC Symbol;Acc:HGNC:1683]	117.991	14.8056	0.125481	-2.99446	0.000467507	0.409096	Down	3	720		MSTRG.37295.1	MSTRG.37295	248.465	0	0	-Inf	0.00235129	1	Down	12	1250		bgrcirc_003280	34.1102	0	0	-Inf	0.00327803	0.996154	Down
ENSBGRG00000021222	INSYN1	inhibitory synaptic factor 1 [Source:HGNC Symbol;Acc:HGNC:33753]	52.4944	238.447	4.54233	2.18343	0.000500502	0.413637	Up	11	1533		MSTRG.260075.10	MSTRG.260075	245.143	0	0	-Inf	0.00242332	1	Down	9	1480		bgrcirc_004226	34.5768	0	0	-Inf	0.00350248	0.996154	Down
ENSBGRG00000012197	ZNF484	zinc finger protein 484 [Source:HGNC Symbol;Acc:HGNC:23385]	225.839	60.6494	0.268551	-1.89673	0.000643944	0.504175	Down	7	2703		MSTRG.136357.7	MSTRG.136357	241.442	0	0	-Inf	0.00243399	1	Down	22	1656		bgrcirc_008367	56.6927	214.672	3.7866	1.9209	0.00351109	0.996154	Up
ENSBGRG00000017033	HDGFL3	HDGF like 3 [Source:HGNC Symbol;Acc:HGNC:24937]	249.983	58.0755	0.232318	-2.10583	0.000878248	0.639175	Down	17	6303		ENSBGRT00000043375	ENSBGRG00000023512	0	237.343	Inf	Inf	0.00251202	1	Up	2	4878		bgrcirc_012818	33.7481	0	0	-Inf	0.00372976	0.996154	Down
ENSBGRG00000018131	-	-	0	35.8127	Inf	Inf	0.000902304	0.639175	Up	26	829		MSTRG.45848.2	MSTRG.45848	0	235.299	Inf	Inf	0.00253203	1	Up	12	1697		bgrcirc_004482	32.3857	0	0	-Inf	0.0038106	0.996154	Down
ENSBGRG00000012069	EMILIN1	elastin microfibril interfacer 1 [Source:HGNC Symbol;Acc:HGNC:19880]	34.9519	172.438	4.93358	2.30264	0.00102516	0.693193	Up	9	3110		MSTRG.131283.1	MSTRG.131283	232.892	0	0	-Inf	0.00282315	1	Down	22	912		bgrcirc_010878	32.9194	0	0	-Inf	0.00400108	0.996154	Down
ENSBGRG00000015631	FAM124B	family with sequence similarity 124 member B [Source:HGNC Symbol;Acc:HGNC:26224]	0	35.138	Inf	Inf	0.00112189	0.697696	Up	2	2392		MSTRG.150888.7	MSTRG.150888	231.445	0	0	-Inf	0.00291776	1	Down	25	946		bgrcirc_001753	32.0595	0	0	-Inf	0.00526114	0.996154	Down
ENSBGRG00000001644	SNX10	sorting nexin 10 [Source:HGNC Symbol;Acc:HGNC:14974]	93.6638	11.917	0.127232	-2.97447	0.00117592	0.697696	Down	4	1073		MSTRG.222503.1	MSTRG.222503	646.17	2.8778	0.00445363	-7.8108	0.00305325	1	Down	6	1725		bgrcirc_010888	42.4612	1.21526	0.0286205	-5.12681	0.00565442	0.996154	Down
ENSBGRG00000018072	HTR4	5-hydroxytryptamine receptor 4 [Source:HGNC Symbol;Acc:HGNC:5299]	0	76.3546	Inf	Inf	0.00118523	0.697696	Up	8	5240		MSTRG.1486.1	MSTRG.1486	226.866	0	0	-Inf	0.00305386	1	Down	1	2258		bgrcirc_002791	30.3959	0	0	-Inf	0.00627049	0.996154	Down
ENSBGRG00000002112	GSTM3	glutathione S-transferase mu 3 [Source:HGNC Symbol;Acc:HGNC:4635]	166.064	36.8615	0.221972	-2.17155	0.00124073	0.697696	Down	3	1114		MSTRG.135989.1	MSTRG.135989	229.106	0	0	-Inf	0.00315405	1	Down	22	2772		bgrcirc_006881	0	31.2698	Inf	Inf	0.00632035	0.996154	Up
ENSBGRG00000022985	SCN4B	sodium voltage-gated channel beta subunit 4 [Source:HGNC Symbol;Acc:HGNC:10592]	299.339	716.687	2.39423	1.25956	0.00126632	0.697696	Up	13	1505		MSTRG.239182.28	MSTRG.239182	0	216.79	Inf	Inf	0.00330628	1	Up	8	1957		bgrcirc_008371	29.4416	0	0	-Inf	0.00642756	0.996154	Down
ENSBGRG00000018805	MORN4	MORN repeat containing 4 [Source:HGNC Symbol;Acc:HGNC:24001]	0	33.8284	Inf	Inf	0.00142173	0.755345	Up	25	2308		MSTRG.156282.4	MSTRG.156282	0	212.527	Inf	Inf	0.00349256	1	Up	26	1093		bgrcirc_005298	0	31.2698	Inf	Inf	0.00666721	0.996154	Up
ENSBGRG00000014965	KRBA1	KRAB-A domain containing 1 [Source:HGNC Symbol;Acc:HGNC:22228]	0	33.4393	Inf	Inf	0.00155134	0.770925	Up	4	3639		MSTRG.55639.4	MSTRG.55639	0	211.612	Inf	Inf	0.00350847	1	Up	13	1264		bgrcirc_006226	0	31.0258	Inf	Inf	0.00685613	0.996154	Up
ENSBGRG00000021840	OSR1	odd-skipped related transcription factor 1 [Source:HGNC Symbol;Acc:HGNC:8111]	2.15377	75.6594	35.1289	5.13459	0.00159994	0.770925	Up	9	1890		MSTRG.44039.2	MSTRG.44039	3007.55	28.5301	0.00948617	-6.71996	0.00365817	1	Down	12	3268		bgrcirc_001982	503.571	1172.95	2.32927	1.21988	0.0072453	0.996154	Up
ENSBGRG00000019277	NID1	nidogen 1 [Source:HGNC Symbol;Acc:HGNC:7821]	1003.17	2108.13	2.10147	1.0714	0.00160653	0.770925	Up	27	4668		MSTRG.214254.1	MSTRG.214254	347.433	0	0	-Inf	0.00378019	1	Down	5	988		bgrcirc_010544	28.6004	0	0	-Inf	0.00746452	0.996154	Down
ENSBGRG00000026388	ALDOA	aldolase, fructose-bisphosphate A [Source:HGNC Symbol;Acc:HGNC:414]	41842.4	91707.4	2.19173	1.13207	0.00182146	0.846751	Up	26	1555		MSTRG.68374.2	MSTRG.68374	288.525	0.317001	0.00109869	-9.82999	0.00383563	1	Down	15	3342		bgrcirc_010334	403.797	180.029	0.44584	-1.1654	0.00755897	0.996154	Down
ENSBGRG00000009791	ABCC8	ATP binding cassette subfamily C member 8 [Source:HGNC Symbol;Acc:HGNC:59]	11.6796	97.2227	8.32412	3.0573	0.00191087	0.848736	Up	13	6972		MSTRG.163310.23	MSTRG.163310	2577.96	25.9941	0.0100832	-6.6319	0.00404599	1	Down	27	3942		bgrcirc_017466	1.11742	39.1617	35.0466	5.1312	0.00773022	0.996154	Up
ENSBGRG00000002139	-	-	2905.21	1354.27	0.466154	-1.10112	0.00201375	0.848736	Down	5	2142		MSTRG.32594.10	MSTRG.32594	0	200.911	Inf	Inf	0.00419754	1	Up	11	849		bgrcirc_011157	28.5879	0	0	-Inf	0.00796681	0.996154	Down
ENSBGRG00000004809	PKHD1L1	PKHD1 like 1 [Source:HGNC Symbol;Acc:HGNC:20313]	623.167	268.935	0.431562	-1.21236	0.00201704	0.848736	Down	18	13244		MSTRG.124090.4	MSTRG.124090	204.82	0	0	-Inf	0.00433328	1	Down	20	3647		bgrcirc_007385	28.1798	0	0	-Inf	0.00804439	0.996154	Down
ENSBGRG00000011698	KCTD15	potassium channel tetramerization domain containing 15 [Source:HGNC Symbol;Acc:HGNC:23297]	6.95892	77.0645	11.0742	3.46913	0.0020826	0.848736	Up	20	3975		MSTRG.112803.7	MSTRG.112803	199.62	0	0	-Inf	0.00434011	1	Down	2	4166		bgrcirc_012558	0	31.1623	Inf	Inf	0.00814014	0.996154	Up
ENSBGRG00000019125	-	-	454.051	1040.53	2.29166	1.19639	0.00217182	0.848736	Up	24	970		MSTRG.273621.1	MSTRG.273621	197.726	0	0	-Inf	0.00438916	1	Down	X	878		bgrcirc_004126	627.787	281.473	0.448357	-1.15728	0.00839105	0.996154	Down
ENSBGRG00000003011	PODN	podocan [Source:HGNC Symbol;Acc:HGNC:23174]	208.728	771.046	3.69403	1.88519	0.00236101	0.857055	Up	3	1918		MSTRG.187213.2	MSTRG.187213	190.147	0	0	-Inf	0.00507317	1	Down	3	1963		bgrcirc_015550	27.7592	0	0	-Inf	0.00866946	0.996154	Down
ENSBGRG00000023064	SERTAD4	SERTA domain containing 4 [Source:HGNC Symbol;Acc:HGNC:25236]	0.683848	50.4778	73.8143	6.20583	0.00236215	0.857055	Up	14	1797		MSTRG.190154.3	MSTRG.190154	186.835	0	0	-Inf	0.00507785	1	Down	4	1196		bgrcirc_009991	27.3386	0	0	-Inf	0.00934327	0.996154	Down
ENSBGRG00000012311	CHCHD1	coiled-coil-helix-coiled-coil-helix domain containing 1 [Source:HGNC Symbol;Acc:HGNC:23518]	0	31.2308	Inf	Inf	0.00242202	0.857855	Up	27	357		MSTRG.41302.17	MSTRG.41302	0	187.068	Inf	Inf	0.00512886	1	Up	12	2011		bgrcirc_016930	27.6086	0	0	-Inf	0.00938032	0.996154	Down
ENSBGRG00000005926	ARMH4	armadillo like helical domain containing 4 [Source:HGNC Symbol;Acc:HGNC:19846]	0	30.9536	Inf	Inf	0.00252261	0.872707	Up	11	3842		MSTRG.175802.14	MSTRG.175802	186.95	0	0	-Inf	0.00522404	1	Down	3	2018		bgrcirc_015634	27.7279	0	0	-Inf	0.0103623	0.996154	Down
ENSBGRG00000004396	LACC1	laccase domain containing 1 [Source:HGNC Symbol;Acc:HGNC:26789]	216.402	57.1057	0.263887	-1.92201	0.00269011	0.895915	Down	15	2712		MSTRG.23584.2	MSTRG.23584	306.656	1.02546	0.00334399	-8.22421	0.0053429	1	Down	10	2725		bgrcirc_000121	26.7089	0	0	-Inf	0.0104519	0.996154	Down
ENSBGRG00000020350	SLAIN1	SLAIN motif family member 1 [Source:HGNC Symbol;Acc:HGNC:26387]	31.5645	0	0	-Inf	0.00271015	0.895915	Down	15	2194		MSTRG.125711.2	MSTRG.125711	0	180.346	Inf	Inf	0.00538785	1	Up	21	1918		bgrcirc_000283	27.5898	0	0	-Inf	0.0104818	0.996154	Down
ENSBGRG00000008276	SLC25A25	solute carrier family 25 member 25 [Source:HGNC Symbol;Acc:HGNC:20663]	229.435	574.005	2.50181	1.32297	0.00292879	0.923446	Up	9	5426		MSTRG.183442.10	MSTRG.183442	0	179.658	Inf	Inf	0.00583887	1	Up	3	1301		bgrcirc_013125	91.7838	16.2719	0.177285	-2.49586	0.0106653	0.996154	Down
ENSBGRG00000013873	COL13A1	collagen type XIII alpha 1 chain [Source:HGNC Symbol;Acc:HGNC:2190]	30.8749	0	0	-Inf	0.0029787	0.923446	Down	27	2244		MSTRG.54723.28	MSTRG.54723	0	175.724	Inf	Inf	0.0061225	1	Up	13	2021		bgrcirc_008109	31.124	0.273316	0.00878152	-6.83131	0.0110699	0.996154	Down
ENSBGRG00000020183	COL15A1	collagen type XV alpha 1 chain [Source:HGNC Symbol;Acc:HGNC:2192]	1333.56	3197.61	2.3978	1.26171	0.00300587	0.923446	Up	7	4241		MSTRG.217973.3	MSTRG.217973	176.099	0	0	-Inf	0.00617437	1	Down	6	1009		bgrcirc_015739	54.9534	5.26613	0.0958288	-3.3834	0.0116045	0.996154	Down
ENSBGRG00000023448	DCX	doublecortin [Source:HGNC Symbol;Acc:HGNC:2714]	0.358961	34.3918	95.8094	6.5821	0.003056	0.923446	Up	X	2490		MSTRG.163310.24	MSTRG.163310	382.69	1.90201	0.00497009	-7.65251	0.00648705	1	Down	27	3942		bgrcirc_000748	32.5472	0.405087	0.0124461	-6.32816	0.0116455	0.996154	Down
ENSBGRG00000013964	LRRC75A	leucine rich repeat containing 75A [Source:HGNC Symbol;Acc:HGNC:32403]	0	29.9582	Inf	Inf	0.00310381	0.923446	Up	19	1038		MSTRG.169104.24	MSTRG.169104	0.3014	216.976	719.894	9.49164	0.00661762	1	Up	28	1007		bgrcirc_013811	26.0768	0	0	-Inf	0.0116968	0.996154	Down
ENSBGRG00000019261	-	-	0	39.4441	Inf	Inf	0.00325201	0.948568	Up	4	7468		MSTRG.124088.16	MSTRG.124088	0	1545.91	Inf	Inf	0.00689856	1	Up	20	4298		bgrcirc_013418	26.0768	0	0	-Inf	0.0116968	0.996154	Down
ENSBGRG00000026260	ENO3	enolase 3 [Source:HGNC Symbol;Acc:HGNC:3354]	5040.84	11876.1	2.35598	1.23633	0.00337949	0.963798	Up	19	1743		MSTRG.173284.1	MSTRG.173284	0	365.759	Inf	Inf	0.00698691	1	Up	29	2423		bgrcirc_016866	26.0768	0	0	-Inf	0.0116968	0.996154	Down
ENSBGRG00000018601	OBSL1	obscurin like cytoskeletal adaptor 1 [Source:HGNC Symbol;Acc:HGNC:29092]	444.837	931.956	2.09505	1.06699	0.00343381	0.963798	Up	2	6435		MSTRG.119508.1	MSTRG.119508	165.491	0	0	-Inf	0.00716385	1	Down	20	1282		bgrcirc_001086	26.0768	0	0	-Inf	0.0116968	0.996154	Down
ENSBGRG00000025509	KCNB1	potassium voltage-gated channel subfamily B member 1 [Source:HGNC Symbol;Acc:HGNC:6231]	78.9766	251.919	3.18979	1.67346	0.00361037	0.973055	Up	12	3479		MSTRG.239668.1	MSTRG.239668	0	162.083	Inf	Inf	0.00728512	1	Up	8	743		bgrcirc_009255	26.7486	0	0	-Inf	0.0121842	0.996154	Down
ENSBGRG00000010740	SLC35F6	solute carrier family 35 member F6 [Source:HGNC Symbol;Acc:HGNC:26055]	1.62443	46.1512	28.4106	4.82836	0.00363068	0.973055	Up	9	1594		MSTRG.119864.2	MSTRG.119864	459.176	0	0	-Inf	0.00750328	1	Down	20	1662		bgrcirc_017034	0.558708	43.0956	77.1343	6.2693	0.012217	0.996154	Up
ENSBGRG00000001610	GABPB2	GA binding protein transcription factor subunit beta 2 [Source:HGNC Symbol;Acc:HGNC:28441]	170.66	44.678	0.261795	-1.93349	0.00366302	0.973055	Down	3	3456		MSTRG.85603.1	MSTRG.85603	166.553	0	0	-Inf	0.00763529	1	Down	17	712		bgrcirc_012340	26.2024	0	0	-Inf	0.0123232	0.996154	Down
ENSBGRG00000020150	ULK4	unc-51 like kinase 4 [Source:HGNC Symbol;Acc:HGNC:15784]	149.964	29.1238	0.194205	-2.36434	0.00378012	0.986545	Down	22	5549		MSTRG.185896.1	MSTRG.185896	0	158.006	Inf	Inf	0.0078216	1	Up	3	759		bgrcirc_014545	27.0186	0	0	-Inf	0.0124492	0.996154	Down
ENSBGRG00000021074	ORMDL3	ORMDL sphingolipid biosynthesis regulator 3 [Source:HGNC Symbol;Acc:HGNC:16038]	307.574	694.432	2.25777	1.1749	0.00396444	0.994044	Up	19	1992		MSTRG.205200.2	MSTRG.205200	161.968	0	0	-Inf	0.00806112	1	Down	5	727		bgrcirc_015203	0	28.5317	Inf	Inf	0.0124774	0.996154	Up
ENSBGRG00000009212	ADPRS	ADP-ribosylhydrolase like 2 [Source:HGNC Symbol;Acc:HGNC:21304]	13.4935	106.991	7.9291	2.98716	0.00400884	0.994044	Up	3	1616		MSTRG.138749.8	MSTRG.138749	569.698	0	0	-Inf	0.00838748	1	Down	22	5143		bgrcirc_005218	26.0643	0	0	-Inf	0.0124882	0.996154	Down
ENSBGRG00000007767	NAV3	neuron navigator 3 [Source:HGNC Symbol;Acc:HGNC:15998]	155.856	407.153	2.61237	1.38536	0.00407614	0.994044	Up	5	8678		MSTRG.276925.30	MSTRG.276925	0	155.506	Inf	Inf	0.00839839	1	Up	Y	207		bgrcirc_004190	25.6562	0	0	-Inf	0.0126067	0.996154	Down
ENSBGRG00000011193	KCNA6	potassium voltage-gated channel subfamily A member 6 [Source:HGNC Symbol;Acc:HGNC:6225]	0	28.4726	Inf	Inf	0.00416959	1	Up	5	1587		MSTRG.164856.2	MSTRG.164856	155.777	0	0	-Inf	0.00851348	1	Down	27	1352		bgrcirc_005455	25.6562	0	0	-Inf	0.0126067	0.996154	Down
ENSBGRG00000007763	LANCL3	LanC like 3 [Source:HGNC Symbol;Acc:HGNC:24767]	63.7367	5.60104	0.0878777	-3.50836	0.00431557	1	Down	X	1269		MSTRG.69305.1	MSTRG.69305	155.133	0	0	-Inf	0.00852313	1	Down	15	1522		bgrcirc_016224	1.67612	35.9456	21.4457	4.42261	0.0127369	0.996154	Up
ENSBGRG00000013210	TRIM7	tripartite motif containing 7 [Source:HGNC Symbol;Acc:HGNC:16278]	225.38	532.086	2.36084	1.2393	0.00456265	1	Up	8	2645		MSTRG.160034.3	MSTRG.160034	199.922	0.317001	0.00158562	-9.30074	0.00855088	1	Down	26	1779		bgrcirc_014068	33.2269	0.810173	0.024383	-5.35798	0.0129919	0.996154	Down
ENSBGRG00000009561	COL11A1	collagen type XI alpha 1 chain [Source:HGNC Symbol;Acc:HGNC:2186]	131.229	3.24603	0.0247356	-5.33727	0.00487817	1	Down	3	5962		MSTRG.91921.2	MSTRG.91921	150.982	0	0	-Inf	0.00925217	1	Down	18	622		bgrcirc_003259	0	29.4834	Inf	Inf	0.0132124	0.996154	Up
ENSBGRG00000010518	MYLK4	myosin light chain kinase family member 4 [Source:HGNC Symbol;Acc:HGNC:27972]	138.789	355.734	2.56312	1.3579	0.0049082	1	Up	24	2911		MSTRG.54295.6	MSTRG.54295	13.6418	1008.09	73.8974	6.20745	0.00935297	1	Up	13	1588		bgrcirc_010944	134.402	321.366	2.39107	1.25766	0.013216	0.996154	Up
ENSBGRG00000013275	HSPBP1	HSPA (Hsp70) binding protein 1 [Source:HGNC Symbol;Acc:HGNC:24989]	21.5133	114.164	5.30664	2.4078	0.00497932	1	Up	20	1302		MSTRG.47683.1	MSTRG.47683	149.012	0	0	-Inf	0.00983571	1	Down	12	897		bgrcirc_016090	25.3738	0	0	-Inf	0.0133908	0.996154	Down
ENSBGRG00000002127	OLFML2B	olfactomedin like 2B [Source:HGNC Symbol;Acc:HGNC:24558]	94.9303	294.659	3.10395	1.63411	0.00509666	1	Up	3	2764		MSTRG.9798.1	MSTRG.9798	0	145.417	Inf	Inf	0.00997473	1	Up	1	731		bgrcirc_008674	0	27.6385	Inf	Inf	0.0135185	0.996154	Up
ENSBGRG00000015978	FRAT2	FRAT regulator of WNT signaling pathway 2 [Source:HGNC Symbol;Acc:HGNC:16048]	0	27.4486	Inf	Inf	0.00523712	1	Up	25	690		MSTRG.45412.2	MSTRG.45412	148.828	0	0	-Inf	0.0101998	1	Down	12	1132		bgrcirc_003694	25.2356	0	0	-Inf	0.0135877	0.996154	Down
ENSBGRG00000001621	AQP3	aquaporin 3 (Gill blood group) [Source:HGNC Symbol;Acc:HGNC:636]	1.79481	43.2053	24.0724	4.58931	0.00547174	1	Up	7	2261		MSTRG.75474.4	MSTRG.75474	143.113	0	0	-Inf	0.0103893	1	Down	16	2304		bgrcirc_003100	0	26.5066	Inf	Inf	0.0138003	0.996154	Up
ENSBGRG00000026708	FTCDNL1	formiminotransferase cyclodeaminase N-terminal like [Source:HGNC Symbol;Acc:HGNC:48661]	30.8912	0	0	-Inf	0.00549424	1	Down	2	2108		MSTRG.125742.2	MSTRG.125742	0	140.6	Inf	Inf	0.0107597	1	Up	21	691		bgrcirc_000958	25.6375	0	0	-Inf	0.0139529	0.996154	Down
ENSBGRG00000003232	LRIF1	ligand dependent nuclear receptor interacting factor 1 [Source:HGNC Symbol;Acc:HGNC:30299]	774.837	354.386	0.457369	-1.12857	0.00556381	1	Down	3	2354		MSTRG.247980.3	MSTRG.247980	760.176	10.8717	0.0143015	-6.12769	0.0110329	1	Down	8	6772		bgrcirc_004837	29.9878	0.336756	0.0112298	-6.47653	0.0141677	0.996154	Down
ENSBGRG00000018249	CCDC8	coiled-coil domain containing 8 [Source:HGNC Symbol;Acc:HGNC:25367]	83.1521	282.674	3.39948	1.76532	0.00565146	1	Up	20	1557		MSTRG.185430.1	MSTRG.185430	141.626	0	0	-Inf	0.0110475	1	Down	3	822		bgrcirc_013853	25.2231	0	0	-Inf	0.0145089	0.996154	Down
ENSBGRG00000012757	-	-	27.7404	0	0	-Inf	0.00572591	1	Down	9	1137		MSTRG.186956.20	MSTRG.186956	138.874	0	0	-Inf	0.0112983	1	Down	3	729		bgrcirc_015753	24.815	0	0	-Inf	0.0146452	0.996154	Down
ENSBGRG00000019549	OTULINL	OTU deubiquitinase with linear linkage specificity like [Source:HGNC Symbol;Acc:HGNC:25629]	314.765	115.225	0.366068	-1.44982	0.00579044	1	Down	23	1126		MSTRG.228681.5	MSTRG.228681	0	137.145	Inf	Inf	0.0116063	1	Up	7	1666		bgrcirc_000641	24.815	0	0	-Inf	0.0146452	0.996154	Down
ENSBGRG00000011517	EVC	EvC ciliary complex subunit 1 [Source:HGNC Symbol;Acc:HGNC:3497]	32.1797	166.321	5.1685	2.36975	0.00588676	1	Up	6	5013		MSTRG.167244.2	MSTRG.167244	140.33	0	0	-Inf	0.0116703	1	Down	28	867		bgrcirc_014191	0	26.1013	Inf	Inf	0.0147232	0.996154	Up
ENSBGRG00000007727	CDKN2C	cyclin dependent kinase inhibitor 2C [Source:HGNC Symbol;Acc:HGNC:1789]	18.5458	102.113	5.50602	2.46101	0.00591084	1	Up	3	1567		MSTRG.221877.4	MSTRG.221877	0	136.297	Inf	Inf	0.0118834	1	Up	6	1352		bgrcirc_015646	49.122	2.69405	0.0548441	-4.18852	0.014906	0.996154	Down
ENSBGRG00000024796	ABCA10	ATP binding cassette subfamily A member 10 [Source:HGNC Symbol;Acc:HGNC:30]	367.973	147.779	0.401603	-1.31616	0.00622378	1	Down	19	6815		MSTRG.73847.12	MSTRG.73847	138.227	0	0	-Inf	0.0119621	1	Down	16	1051		bgrcirc_015326	182.037	372.583	2.04675	1.03333	0.0150027	0.996154	Up
ENSBGRG00000025371	ATP2B2	ATPase plasma membrane Ca2+ transporting 2 [Source:HGNC Symbol;Acc:HGNC:815]	53.5585	179.16	3.34513	1.74206	0.00637344	1	Up	22	5420		MSTRG.83036.18	MSTRG.83036	208.261	0	0	-Inf	0.0119665	1	Down	17	2476		bgrcirc_003976	29.1591	0.405087	0.0138923	-6.16957	0.0150245	0.996154	Down
ENSBGRG00000014082	LASP1	LIM and SH3 protein 1 [Source:HGNC Symbol;Acc:HGNC:6513]	290.75	677.493	2.33016	1.22043	0.0065195	1	Up	19	4641		MSTRG.210986.1	MSTRG.210986	0	135.391	Inf	Inf	0.012204	1	Up	5	1313		bgrcirc_017816	24.6036	0	0	-Inf	0.0152072	0.996154	Down
ENSBGRG00000023836	-	-	21.9854	110.011	5.00383	2.32303	0.00659745	1	Up	20	1849		MSTRG.145453.22	MSTRG.145453	720.575	11.5112	0.015975	-5.96804	0.0122541	1	Down	24	2040		bgrcirc_000066	42.7125	2.43052	0.0569042	-4.13532	0.0155915	0.996154	Down
ENSBGRG00000022300	-	-	122.339	25.5605	0.208932	-2.25889	0.00662276	1	Down	13	1065		MSTRG.62022.1	MSTRG.62022	0	134.167	Inf	Inf	0.0125377	1	Up	14	602		bgrcirc_014157	24.3945	0	0	-Inf	0.0157852	0.996154	Down
ENSBGRG00000006670	MTUS2	microtubule associated scaffold protein 2 [Source:HGNC Symbol;Acc:HGNC:20595]	25.0978	122.383	4.87624	2.28577	0.00672606	1	Up	15	6156		MSTRG.17182.3	MSTRG.17182	137.666	0	0	-Inf	0.01261	1	Down	10	1364		bgrcirc_009123	24.3945	0	0	-Inf	0.0157852	0.996154	Down
ENSBGRG00000002196	MTTP	microsomal triglyceride transfer protein [Source:HGNC Symbol;Acc:HGNC:7467]	26.4429	0	0	-Inf	0.00672754	1	Down	6	3723		MSTRG.129705.11	MSTRG.129705	8.73074	635.671	72.8084	6.18603	0.0126382	1	Up	21	3546		bgrcirc_008590	25.142	0	0	-Inf	0.0160339	0.996154	Down
ENSBGRG00000012998	ABCC10	ATP binding cassette subfamily C member 10 [Source:HGNC Symbol;Acc:HGNC:52]	14.6199	112.919	7.72361	2.94928	0.00683297	1	Up	24	4680		MSTRG.45729.2	MSTRG.45729	0	131.344	Inf	Inf	0.0130878	1	Up	12	937		bgrcirc_015729	24.5263	0	0	-Inf	0.01607	0.996154	Down
ENSBGRG00000002228	IGFBP5	insulin like growth factor binding protein 5 [Source:HGNC Symbol;Acc:HGNC:5474]	1707.02	4160.38	2.43721	1.28523	0.00690879	1	Up	2	2426		MSTRG.149054.7	MSTRG.149054	133.459	0	0	-Inf	0.0131743	1	Down	24	1387		bgrcirc_006179	25.7506	0	0	-Inf	0.0163968	0.996154	Down
ENSBGRG00000024660	TMEM115	transmembrane protein 115 [Source:HGNC Symbol;Acc:HGNC:30055]	36.8061	205.588	5.58571	2.48174	0.00707557	1	Up	22	1056		MSTRG.39908.2	MSTRG.39908	132.227	0	0	-Inf	0.0132267	1	Down	12	2370		bgrcirc_000064	90.6462	18.5609	0.204762	-2.28798	0.0167934	0.996154	Down
ENSBGRG00000011514	-	-	26.2875	0	0	-Inf	0.00712815	1	Down	8	2352		MSTRG.139473.1	MSTRG.139473	0	128.528	Inf	Inf	0.0137008	1	Up	22	876		bgrcirc_015840	26.0206	0	0	-Inf	0.0170234	0.996154	Down
ENSBGRG00000023483	IP6K2	inositol hexakisphosphate kinase 2 [Source:HGNC Symbol;Acc:HGNC:17313]	295.802	115.547	0.390623	-1.35615	0.00720702	1	Down	22	1278		MSTRG.190157.1	MSTRG.190157	130.924	0	0	-Inf	0.0140979	1	Down	4	1079		bgrcirc_015438	0	26.311	Inf	Inf	0.0182944	0.996154	Up
ENSBGRG00000007032	IYD	iodotyrosine deiodinase [Source:HGNC Symbol;Acc:HGNC:21071]	69.702	7.80538	0.111982	-3.15866	0.00758632	1	Down	10	1335		MSTRG.147047.3	MSTRG.147047	0	222.923	Inf	Inf	0.0141015	1	Up	24	2423		bgrcirc_002913	23.5533	0	0	-Inf	0.0183389	0.996154	Down
ENSBGRG00000024054	COL22A1	collagen type XXII alpha 1 chain [Source:HGNC Symbol;Acc:HGNC:22989]	26.0762	0	0	-Inf	0.00761507	1	Down	18	6992		MSTRG.173716.6	MSTRG.173716	344.409	0	0	-Inf	0.0141037	1	Down	29	2974		bgrcirc_005118	27.7592	0.273316	0.00984595	-6.66625	0.0188929	0.996154	Down
ENSBGRG00000014917	ACAD8	acyl-CoA dehydrogenase family member 8 [Source:HGNC Symbol;Acc:HGNC:87]	79.6245	280.598	3.52402	1.81722	0.0077893	1	Up	13	2891		MSTRG.264083.5	MSTRG.264083	0	136.462	Inf	Inf	0.014196	1	Up	VBZB01000110.1	1068		bgrcirc_000679	344.173	158.276	0.459874	-1.12069	0.0191513	0.996154	Down
ENSBGRG00000024474	GADL1	glutamate decarboxylase like 1 [Source:HGNC Symbol;Acc:HGNC:27949]	570.415	1145.91	2.0089	1.00641	0.00793017	1	Up	22	2570		MSTRG.2715.8	MSTRG.2715	3.35972	346.765	103.212	6.68947	0.0144288	1	Up	1	2698		bgrcirc_001951	54.3635	5.3881	0.0991125	-3.33479	0.0194831	0.996154	Down
ENSBGRG00000026102	HAGH	hydroxyacylglutathione hydrolase [Source:HGNC Symbol;Acc:HGNC:4805]	224.226	487.217	2.17288	1.11961	0.00793929	1	Up	26	924		MSTRG.87946.1	MSTRG.87946	0	126.655	Inf	Inf	0.0144315	1	Up	17	601		bgrcirc_016393	22.9883	0	0	-Inf	0.0206978	0.996154	Down
ENSBGRG00000021046	SNX18	sorting nexin 18 [Source:HGNC Symbol;Acc:HGNC:19245]	92.1565	252.215	2.73681	1.45249	0.00798514	1	Up	23	2759		MSTRG.242017.3	MSTRG.242017	0	125.821	Inf	Inf	0.014483	1	Up	8	1700		bgrcirc_010108	48.7576	4.04108	0.0828809	-3.59282	0.0206993	0.996154	Down
ENSBGRG00000023703	HDAC7	histone deacetylase 7 [Source:HGNC Symbol;Acc:HGNC:14067]	198.138	504.895	2.54821	1.34948	0.00802842	1	Up	5	4822		MSTRG.150881.10	MSTRG.150881	129.583	0	0	-Inf	0.0146452	1	Down	25	585		bgrcirc_015015	0	23.4317	Inf	Inf	0.0212464	0.996154	Up
ENSBGRG00000014709	TECRL	trans-2,3-enoyl-CoA reductase like [Source:HGNC Symbol;Acc:HGNC:27365]	620.452	254.408	0.410036	-1.28618	0.00814601	1	Down	6	2149		MSTRG.91595.2	MSTRG.91595	130.173	0	0	-Inf	0.0146669	1	Down	18	741		bgrcirc_001062	22.7121	0	0	-Inf	0.0213068	0.996154	Down
ENSBGRG00000005880	VSTM2L	V-set and transmembrane domain containing 2 like [Source:HGNC Symbol;Acc:HGNC:16096]	0	26.2325	Inf	Inf	0.008374	1	Up	12	1094		MSTRG.150331.1	MSTRG.150331	129.637	0	0	-Inf	0.0148085	1	Down	25	893		bgrcirc_010208	22.7121	0	0	-Inf	0.0213068	0.996154	Down
ENSBGRG00000019283	AGMAT	agmatinase [Source:HGNC Symbol;Acc:HGNC:18407]	25.591	0	0	-Inf	0.00845176	1	Down	14	1593		MSTRG.26529.1	MSTRG.26529	127.829	0	0	-Inf	0.0148359	1	Down	11	1674		bgrcirc_013717	22.7121	0	0	-Inf	0.0213068	0.996154	Down
ENSBGRG00000003997	PEDS1	transmembrane protein 189 [Source:HGNC Symbol;Acc:HGNC:16735]	313.645	668.652	2.13188	1.09213	0.00852328	1	Up	12	1485		MSTRG.123130.3	MSTRG.123130	127.026	0	0	-Inf	0.0148964	1	Down	20	797		bgrcirc_015724	68.5288	10.4493	0.152481	-2.7133	0.0214831	0.996154	Down
ENSBGRG00000010704	VASH1	vasohibin 1 [Source:HGNC Symbol;Acc:HGNC:19964]	20.0043	126.407	6.31896	2.65969	0.00858776	1	Up	11	4544		MSTRG.262638.1	MSTRG.262638	0	125.326	Inf	Inf	0.0148999	1	Up	9	926		bgrcirc_006455	23.522	0	0	-Inf	0.0220343	0.996154	Down
ENSBGRG00000010420	NAGA	alpha-N-acetylgalactosaminidase [Source:HGNC Symbol;Acc:HGNC:7631]	29.9922	126.943	4.23254	2.08152	0.00881871	1	Up	5	2293		MSTRG.41329.2	MSTRG.41329	129.294	0	0	-Inf	0.014909	1	Down	12	668		bgrcirc_001008	22.9758	0	0	-Inf	0.0221783	0.996154	Down
ENSBGRG00000015957	GLIS2	GLIS family zinc finger 2 [Source:HGNC Symbol;Acc:HGNC:29450]	4.22353	51.7665	12.2567	3.6155	0.00892236	1	Up	26	2664		MSTRG.185589.1	MSTRG.185589	127.878	0	0	-Inf	0.0150978	1	Down	3	469		bgrcirc_007719	111.019	253.937	2.28733	1.19366	0.0225051	0.996154	Up
ENSBGRG00000005276	-	-	624.804	308.116	0.49314	-1.01993	0.00892766	1	Down	3	1200		MSTRG.167967.3	MSTRG.167967	162.988	0	0	-Inf	0.0154546	1	Down	28	1167		bgrcirc_002717	0	22.8608	Inf	Inf	0.0227568	0.996154	Up
ENSBGRG00000026426	YPEL3	yippee like 3 [Source:HGNC Symbol;Acc:HGNC:18327]	226.905	512.016	2.25652	1.1741	0.00899115	1	Up	26	358		MSTRG.24136.1	MSTRG.24136	0	123.654	Inf	Inf	0.0155327	1	Up	10	985		bgrcirc_000105	22.2915	0	0	-Inf	0.0229665	0.996154	Down
ENSBGRG00000012579	FOXO1	forkhead box O1 [Source:HGNC Symbol;Acc:HGNC:3819]	2445.6	1096.25	0.448253	-1.15762	0.00903014	1	Down	15	2999		MSTRG.246785.1	MSTRG.246785	125.968	0	0	-Inf	0.0156442	1	Down	8	915		bgrcirc_010147	22.2915	0	0	-Inf	0.0229665	0.996154	Down
ENSBGRG00000003400	KIF20A	kinesin family member 20A [Source:HGNC Symbol;Acc:HGNC:9787]	0	24.9566	Inf	Inf	0.00913006	1	Up	8	3370		MSTRG.195869.8	MSTRG.195869	124.569	0	0	-Inf	0.0156447	1	Down	4	1377		bgrcirc_007578	22.2852	0	0	-Inf	0.0237109	0.996154	Down
ENSBGRG00000018787	GPRC5B	G protein-coupled receptor class C group 5 member B [Source:HGNC Symbol;Acc:HGNC:13308]	50.8337	177.722	3.49614	1.80576	0.00931186	1	Up	26	1515		MSTRG.98963.1	MSTRG.98963	0	122.208	Inf	Inf	0.0157307	1	Up	19	510		bgrcirc_015822	44.1436	3.36756	0.0762865	-3.71243	0.0238219	0.996154	Down
ENSBGRG00000013185	IRS1	insulin receptor substrate 1 [Source:HGNC Symbol;Acc:HGNC:6125]	180.019	409.831	2.2766	1.18688	0.00959406	1	Up	2	3714		MSTRG.34872.1	MSTRG.34872	0	122.625	Inf	Inf	0.0157351	1	Up	11	1457		bgrcirc_005769	21.8709	0	0	-Inf	0.0247556	0.996154	Down
ENSBGRG00000002440	IGFBP6	insulin like growth factor binding protein 6 [Source:HGNC Symbol;Acc:HGNC:5475]	88.1918	395.984	4.49004	2.16673	0.00960064	1	Up	5	911		MSTRG.207631.1	MSTRG.207631	488.112	0	0	-Inf	0.0158001	1	Down	5	692		bgrcirc_002774	22.4108	0	0	-Inf	0.0251477	0.996154	Down
ENSBGRG00000019922	PCIF1	PDX1 C-terminal inhibiting factor 1 [Source:HGNC Symbol;Acc:HGNC:16200]	83.7445	259.767	3.1019	1.63315	0.0097814	1	Up	12	3581		MSTRG.40939.1	MSTRG.40939	0	121.494	Inf	Inf	0.0159669	1	Up	12	1177		bgrcirc_011308	21.4503	0	0	-Inf	0.0266843	0.996154	Down
ENSBGRG00000001095	SH3BP1	SH3 domain binding protein 1 [Source:HGNC Symbol;Acc:HGNC:10824]	4.91466	55.1616	11.2239	3.4885	0.00994561	1	Up	5	2452		MSTRG.206058.1	MSTRG.206058	0	121.77	Inf	Inf	0.0160392	1	Up	5	590		bgrcirc_014936	21.4503	0	0	-Inf	0.0266843	0.996154	Down
ENSBGRG00000013014	-	-	0	23.4776	Inf	Inf	0.0100694	1	Up	13	963		MSTRG.238172.19	MSTRG.238172	0	162.976	Inf	Inf	0.0160695	1	Up	7	2151		bgrcirc_007097	21.4503	0	0	-Inf	0.0266843	0.996154	Down
ENSBGRG00000025536	PLOD3	procollagen-lysine,2-oxoglutarate 5-dioxygenase 3 [Source:HGNC Symbol;Acc:HGNC:9083]	63.5629	193.252	3.04032	1.60422	0.010232	1	Up	26	2557		MSTRG.19312.1	MSTRG.19312	124.434	0	0	-Inf	0.0162337	1	Down	10	593		bgrcirc_015749	21.4503	0	0	-Inf	0.0266843	0.996154	Down
ENSBGRG00000015740	-	-	0	23.4274	Inf	Inf	0.010291	1	Up	9	390		MSTRG.135813.3	MSTRG.135813	0.327839	151.013	460.633	8.84747	0.0166602	1	Up	22	617		bgrcirc_008867	22.6746	0	0	-Inf	0.0268467	0.996154	Down
ENSBGRG00000023632	-	-	0	24.6401	Inf	Inf	0.0104025	1	Up	15	3911		MSTRG.183451.3	MSTRG.183451	0.818507	192.716	235.448	7.87927	0.0167866	1	Up	3	1260		bgrcirc_015858	26.623	122.6	4.60503	2.20321	0.0271145	0.996154	Up
ENSBGRG00000024606	COL21A1	collagen type XXI alpha 1 chain [Source:HGNC Symbol;Acc:HGNC:17025]	8.42766	79.5416	9.43817	3.23851	0.0105025	1	Up	24	2880		MSTRG.247538.2	MSTRG.247538	0.545671	171.158	313.666	8.29308	0.0168129	1	Up	8	1610		bgrcirc_007898	38.3997	2.35729	0.0613884	-4.02589	0.0273409	0.996154	Down
ENSBGRG00000025096	ANGPTL4	angiopoietin like 4 [Source:HGNC Symbol;Acc:HGNC:16039]	74.4624	295.749	3.97178	1.98979	0.0109917	1	Up	8	1448		MSTRG.178835.1	MSTRG.178835	0	117.933	Inf	Inf	0.0173303	1	Up	3	460		bgrcirc_000654	21.0297	0	0	-Inf	0.0287634	0.996154	Down
ENSBGRG00000019131	NEURL2	neuralized E3 ubiquitin protein ligase 2 [Source:HGNC Symbol;Acc:HGNC:16156]	39.3964	163.254	4.14389	2.05098	0.011046	1	Up	12	1629		MSTRG.39906.2	MSTRG.39906	287.954	2.98812	0.0103771	-6.59046	0.0175989	1	Down	12	4501		bgrcirc_001093	21.0297	0	0	-Inf	0.0287634	0.996154	Down
ENSBGRG00000016460	KATNB1	katanin regulatory subunit B1 [Source:HGNC Symbol;Acc:HGNC:6217]	40.07	151.725	3.7865	1.92087	0.0110534	1	Up	20	4170		MSTRG.135820.2	MSTRG.135820	0	117.252	Inf	Inf	0.0176666	1	Up	22	1011		bgrcirc_008873	21.0297	0	0	-Inf	0.0287634	0.996154	Down
ENSBGRG00000019811	MRPL54	mitochondrial ribosomal protein L54 [Source:HGNC Symbol;Acc:HGNC:16685]	4.57606	50.9901	11.1428	3.47804	0.011341	1	Up	8	1134		MSTRG.238472.7	MSTRG.238472	0	116.65	Inf	Inf	0.0176753	1	Up	8	865		bgrcirc_006351	39.7245	114.811	2.89018	1.53116	0.029205	0.996154	Up
ENSBGRG00000005843	GAS1	growth arrest specific 1 [Source:HGNC Symbol;Acc:HGNC:4165]	33.3247	166.602	4.99937	2.32174	0.011354	1	Up	7	1740		MSTRG.71299.1	MSTRG.71299	117.76	0	0	-Inf	0.0179202	1	Down	15	572		bgrcirc_014239	21.1616	0	0	-Inf	0.0292893	0.996154	Down
ENSBGRG00000021005	ZNF503	zinc finger protein 503 [Source:HGNC Symbol;Acc:HGNC:23589]	20.327	135.032	6.64299	2.73183	0.0113868	1	Up	27	2652		MSTRG.36249.1	MSTRG.36249	120.491	0	0	-Inf	0.0181591	1	Down	11	453		bgrcirc_003993	8.93933	99.6315	11.1453	3.47836	0.0293132	0.996154	Up
ENSBGRG00000018731	STXBP5	syntaxin binding protein 5 [Source:HGNC Symbol;Acc:HGNC:19665]	699.928	329.233	0.470381	-1.0881	0.0114816	1	Down	10	3817		MSTRG.235029.2	MSTRG.235029	0	116.426	Inf	Inf	0.0183368	1	Up	7	2396		bgrcirc_017501	2.23483	31.5043	14.097	3.81731	0.0293309	0.996154	Up
ENSBGRG00000019666	PLTP	phospholipid transfer protein [Source:HGNC Symbol;Acc:HGNC:9093]	3.67694	47.9711	13.0465	3.70559	0.0114999	1	Up	12	3351		MSTRG.214794.1	MSTRG.214794	0	146.955	Inf	Inf	0.0184406	1	Up	5	547		bgrcirc_005300	6.70449	43.3884	6.47154	2.69411	0.0293902	0.996154	Up
ENSBGRG00000025209	MPI	mannose phosphate isomerase [Source:HGNC Symbol;Acc:HGNC:7216]	131.292	323.829	2.46648	1.30246	0.0116227	1	Up	17	3844		MSTRG.58177.20	MSTRG.58177	0	115.439	Inf	Inf	0.0184522	1	Up	14	776		bgrcirc_008832	21.2934	0	0	-Inf	0.0299593	0.996154	Down
ENSBGRG00000010077	PPIC	peptidylprolyl isomerase C [Source:HGNC Symbol;Acc:HGNC:9256]	50.633	181.342	3.5815	1.84056	0.0116367	1	Up	8	2490		MSTRG.256996.1	MSTRG.256996	120.042	0	0	-Inf	0.0184549	1	Down	9	619		bgrcirc_007605	0	21.7577	Inf	Inf	0.0306899	0.996154	Up
ENSBGRG00000010901	DHRS7B	dehydrogenase/reductase 7B [Source:HGNC Symbol;Acc:HGNC:24547]	51.9672	210.027	4.04154	2.0149	0.0117244	1	Up	19	1828		MSTRG.37298.2	MSTRG.37298	3.54686	318.857	89.8982	6.49022	0.0186927	1	Up	12	1888		bgrcirc_001348	321.015	134.904	0.420242	-1.25071	0.0309026	0.996154	Down
ENSBGRG00000018717	CNPY4	canopy FGF signaling regulator 4 [Source:HGNC Symbol;Acc:HGNC:28631]	11.1778	78.366	7.01084	2.80959	0.0121109	1	Up	26	714		MSTRG.46039.1	MSTRG.46039	0	114.852	Inf	Inf	0.0188739	1	Up	12	898		bgrcirc_004432	20.6091	0	0	-Inf	0.0310046	0.996154	Down
ENSBGRG00000016312	-	-	94.3354	17.7007	0.187636	-2.41399	0.012414	1	Down	12	459		MSTRG.20364.2	MSTRG.20364	115.088	0	0	-Inf	0.019067	1	Down	10	706		bgrcirc_007384	20.6091	0	0	-Inf	0.0310046	0.996154	Down
ENSBGRG00000010622	FNDC10	fibronectin type III domain containing 10 [Source:HGNC Symbol;Acc:HGNC:42951]	0	22.4605	Inf	Inf	0.0124456	1	Up	14	678		MSTRG.215018.1	MSTRG.215018	116.859	0	0	-Inf	0.0192024	1	Down	5	658		bgrcirc_017679	20.6091	0	0	-Inf	0.0310046	0.996154	Down
ENSBGRG00000006039	XYLT2	xylosyltransferase 2 [Source:HGNC Symbol;Acc:HGNC:15517]	15.4741	113.63	7.3432	2.87641	0.0126286	1	Up	19	3359		MSTRG.34416.1	MSTRG.34416	114.303	0	0	-Inf	0.0192227	1	Down	11	962		bgrcirc_009998	20.6091	0	0	-Inf	0.0310046	0.996154	Down
ENSBGRG00000009352	KLHL34	kelch like family member 34 [Source:HGNC Symbol;Acc:HGNC:26634]	180.997	424.901	2.34755	1.23116	0.0127879	1	Up	X	2457		MSTRG.162357.1	MSTRG.162357	14.7331	720.681	48.9157	5.61223	0.0192378	1	Up	27	1819		bgrcirc_016124	20.6091	0	0	-Inf	0.0310046	0.996154	Down
ENSBGRG00000004243	MRTO4	MRT4 homolog, ribosome maturation factor [Source:HGNC Symbol;Acc:HGNC:18477]	77.9796	214.294	2.74808	1.45842	0.0128536	1	Up	2	1694		MSTRG.83075.2	MSTRG.83075	0	143.423	Inf	Inf	0.0195284	1	Up	17	577		bgrcirc_006559	33.7169	109.271	3.24084	1.69637	0.0311208	0.996154	Up
ENSBGRG00000021269	TP53I13	tumor protein p53 inducible protein 13 [Source:HGNC Symbol;Acc:HGNC:25102]	1.62443	36.4805	22.4573	4.48912	0.0129202	1	Up	19	1383		MSTRG.41822.8	MSTRG.41822	113.27	0	0	-Inf	0.0197531	1	Down	12	1025		bgrcirc_008519	21.8334	0	0	-Inf	0.0312632	0.996154	Down
ENSBGRG00000025283	SCAMP2	secretory carrier membrane protein 2 [Source:HGNC Symbol;Acc:HGNC:10564]	92.7171	242.279	2.6131	1.38576	0.0129708	1	Up	17	4863		MSTRG.9668.5	MSTRG.9668	1131.37	0	0	-Inf	0.0200403	1	Down	1	3373		bgrcirc_000791	0	22.3627	Inf	Inf	0.0313062	0.996154	Up
ENSBGRG00000011115	SLC25A33	solute carrier family 25 member 33 [Source:HGNC Symbol;Acc:HGNC:29681]	141.612	28.0762	0.198261	-2.33452	0.0130084	1	Down	14	1358		ENSBGRT00000043431	ENSBGRG00000023534	112.635	0	0	-Inf	0.0204073	1	Down	19	5266		bgrcirc_007496	24.3945	0.405087	0.0166057	-5.91218	0.0315941	0.996154	Down
ENSBGRG00000020580	CASP3	caspase 3 [Source:HGNC Symbol;Acc:HGNC:1504]	74.5067	15.7475	0.211357	-2.24225	0.0130638	1	Down	28	1068		MSTRG.265509.1	MSTRG.265509	110.788	0	0	-Inf	0.0205057	1	Down	X	969		bgrcirc_001146	21.0109	0	0	-Inf	0.0319036	0.996154	Down
ENSBGRG00000006355	OLFM1	olfactomedin 1 [Source:HGNC Symbol;Acc:HGNC:17187]	25.5441	115.861	4.53571	2.18133	0.0132368	1	Up	9	3638		MSTRG.44006.1	MSTRG.44006	113.514	0	0	-Inf	0.0207209	1	Down	12	660		bgrcirc_009584	21.9652	0	0	-Inf	0.0326677	0.996154	Down
ENSBGRG00000018647	HIF3A	hypoxia inducible factor 3 subunit alpha [Source:HGNC Symbol;Acc:HGNC:15825]	141.98	15.0816	0.106224	-3.23482	0.0134589	1	Down	20	2625		MSTRG.266221.1	MSTRG.266221	113.032	0	0	-Inf	0.0208118	1	Down	X	757		bgrcirc_015347	1.11742	32.7192	29.2812	4.8719	0.0327878	0.996154	Up
ENSBGRG00000006944	LEF1	lymphoid enhancer binding factor 1 [Source:HGNC Symbol;Acc:HGNC:6551]	60.7344	7.66669	0.126233	-2.98584	0.0134893	1	Down	6	2610		MSTRG.173977.1	MSTRG.173977	0	110.597	Inf	Inf	0.0211356	1	Up	29	953		bgrcirc_005133	61.8086	10.5127	0.170084	-2.55568	0.0330998	0.996154	Down
ENSBGRG00000020868	HTR2A	5-hydroxytryptamine receptor 2A [Source:HGNC Symbol;Acc:HGNC:5293]	0	23.5221	Inf	Inf	0.013557	1	Up	15	2318		MSTRG.174368.14	MSTRG.174368	110.496	0	0	-Inf	0.0211978	1	Down	29	702		bgrcirc_009646	20.1885	0	0	-Inf	0.0334203	0.996154	Down
ENSBGRG00000012398	P2RY1	purinergic receptor P2Y1 [Source:HGNC Symbol;Acc:HGNC:8539]	220.849	475.874	2.15475	1.10752	0.0136509	1	Up	1	1119		MSTRG.257531.1	MSTRG.257531	0	109.016	Inf	Inf	0.0213827	1	Up	9	619		bgrcirc_001373	15.3676	59.8215	3.89271	1.96077	0.0334251	0.996154	Up
ENSBGRG00000014041	-	-	444.796	958.588	2.15512	1.10777	0.0137306	1	Up	20	3284		ENSBGRT00000015759	ENSBGRG00000008661	0	108.295	Inf	Inf	0.0215116	1	Up	11	5503		bgrcirc_014489	60.748	186.906	3.07675	1.62141	0.0336997	0.996154	Up
ENSBGRG00000004287	PPM1J	protein phosphatase, Mg2+/Mn2+ dependent 1J [Source:HGNC Symbol;Acc:HGNC:20785]	23.6234	99.907	4.22915	2.08037	0.0141167	1	Up	3	1911		MSTRG.33667.5	MSTRG.33667	9.042	478.62	52.9329	5.72609	0.0215847	1	Up	11	594		bgrcirc_008467	0	21.1134	Inf	Inf	0.0342692	0.996154	Up
ENSBGRG00000014551	SPP2	secreted phosphoprotein 2 [Source:HGNC Symbol;Acc:HGNC:11256]	0	22.6045	Inf	Inf	0.0141746	1	Up	3	872		MSTRG.156314.2	MSTRG.156314	0.272836	134.052	491.33	8.94055	0.0217227	1	Up	26	523		bgrcirc_004144	20.5903	0	0	-Inf	0.034398	0.996154	Down
ENSBGRG00000021516	GNAO1	G protein subunit alpha o1 [Source:HGNC Symbol;Acc:HGNC:4389]	52.8786	4.60027	0.0869968	-3.52289	0.0142264	1	Down	20	1407		MSTRG.146778.6	MSTRG.146778	875.869	0	0	-Inf	0.0219115	1	Down	24	4771		bgrcirc_007574	0	21.1865	Inf	Inf	0.0345737	0.996154	Up
ENSBGRG00000005556	VAMP5	vesicle associated membrane protein 5 [Source:HGNC Symbol;Acc:HGNC:12646]	47.4722	228.997	4.82382	2.27018	0.0143805	1	Up	9	351		MSTRG.98450.2	MSTRG.98450	109.702	0	0	-Inf	0.0220526	1	Down	19	500		bgrcirc_002100	19.9794	0	0	-Inf	0.0346917	0.996154	Down
ENSBGRG00000007158	SOX8	SRY-box transcription factor 8 [Source:HGNC Symbol;Acc:HGNC:11203]	15.0605	78.4994	5.21227	2.38191	0.0146736	1	Up	26	2605		MSTRG.159512.1	MSTRG.159512	0	106.658	Inf	Inf	0.0222297	1	Up	26	1287		bgrcirc_016013	8.66935	52.5006	6.05589	2.59834	0.0347212	0.996154	Up
ENSBGRG00000026590	-	-	1.62443	37.2297	22.9186	4.51845	0.0150376	1	Up	26	2458		MSTRG.128956.1	MSTRG.128956	0	107.551	Inf	Inf	0.0227341	1	Up	21	830		bgrcirc_006550	0	20.4644	Inf	Inf	0.0351966	0.996154	Up
ENSBGRG00000024594	MEX3C	mex-3 RNA binding family member C [Source:HGNC Symbol;Acc:HGNC:28040]	201.134	76.4525	0.380107	-1.39552	0.0152012	1	Down	21	1977		MSTRG.166493.5	MSTRG.166493	0	105.807	Inf	Inf	0.0228587	1	Up	28	648		bgrcirc_013478	149.094	41.8949	0.280997	-1.83137	0.0354561	0.996154	Down
ENSBGRG00000007613	WDR86	WD repeat domain 86 [Source:HGNC Symbol;Acc:HGNC:28020]	12.6524	73.3955	5.80093	2.53628	0.0153666	1	Up	4	1557		MSTRG.225503.2	MSTRG.225503	195.15	0	0	-Inf	0.0228601	1	Down	6	1243		bgrcirc_012582	20.176	0	0	-Inf	0.0357215	0.996154	Down
ENSBGRG00000026296	ADORA1	adenosine A1 receptor [Source:HGNC Symbol;Acc:HGNC:262]	0	21.9256	Inf	Inf	0.015414	1	Up	14	1075		MSTRG.2667.1	MSTRG.2667	0	105.611	Inf	Inf	0.0228814	1	Up	1	694		bgrcirc_012428	19.7679	0	0	-Inf	0.0360243	0.996154	Down
ENSBGRG00000009308	KIRREL1	kirre like nephrin family adhesion molecule 1 [Source:HGNC Symbol;Acc:HGNC:15734]	37.183	129.823	3.49145	1.80383	0.0154995	1	Up	3	3291		MSTRG.144963.1	MSTRG.144963	0	104.761	Inf	Inf	0.0233177	1	Up	24	600		bgrcirc_001430	19.7679	0	0	-Inf	0.0360243	0.996154	Down
ENSBGRG00000015947	-	-	103.135	23.5279	0.228127	-2.13209	0.0155174	1	Down	10	1004		MSTRG.264081.11	MSTRG.264081	767.666	0	0	-Inf	0.0233994	1	Down	VBZB01000110.1	2013		bgrcirc_011298	23.5533	0.405087	0.0171987	-5.86155	0.0360585	0.996154	Down
ENSBGRG00000014092	SOD3	superoxide dismutase 3 [Source:HGNC Symbol;Acc:HGNC:11181]	1.29955	34.4782	26.5309	4.7296	0.0155923	1	Up	6	2488		MSTRG.31155.1	MSTRG.31155	106.528	0	0	-Inf	0.0235892	1	Down	11	871		bgrcirc_012064	12.0278	62.8277	5.22352	2.38502	0.036266	0.996154	Up
ENSBGRG00000024889	CD82	CD82 molecule [Source:HGNC Symbol;Acc:HGNC:6210]	152.556	388.88	2.54909	1.34998	0.0157556	1	Up	13	2180		MSTRG.27125.2	MSTRG.27125	106.744	0	0	-Inf	0.0236681	1	Down	11	1077		bgrcirc_006409	0	20.2106	Inf	Inf	0.0362913	0.996154	Up
ENSBGRG00000025588	ADGRE1	adhesion G protein-coupled receptor E1 [Source:HGNC Symbol;Acc:HGNC:3336]	26.2365	0.295094	0.0112474	-6.47426	0.0158174	1	Down	8	3094		MSTRG.226611.13	MSTRG.226611	684.818	0	0	-Inf	0.0236799	1	Down	7	5633		bgrcirc_000767	23.5533	0.336756	0.0142977	-6.12808	0.0363758	0.996154	Down
ENSBGRG00000026887	GALNS	galactosamine (N-acetyl)-6-sulfatase [Source:HGNC Symbol;Acc:HGNC:4122]	1.79481	36.2593	20.2024	4.33645	0.015822	1	Up	20	1663		MSTRG.23311.1	MSTRG.23311	0.272836	130.627	478.776	8.90321	0.0236999	1	Up	10	1147		bgrcirc_017114	20.3079	0	0	-Inf	0.0366493	0.996154	Down
ENSBGRG00000008883	CLEC4D	C-type lectin domain family 4 member D [Source:HGNC Symbol;Acc:HGNC:14554]	22.2444	0	0	-Inf	0.0158937	1	Down	5	3105		MSTRG.238179.3	MSTRG.238179	106.131	0	0	-Inf	0.0237547	1	Down	7	444		bgrcirc_009967	0	21.0547	Inf	Inf	0.0370312	0.996154	Up
ENSBGRG00000000753	CLPP	caseinolytic mitochondrial matrix peptidase proteolytic subunit [Source:HGNC Symbol;Acc:HGNC:2084]	117.089	296.403	2.53144	1.33996	0.0159459	1	Up	8	819		MSTRG.243909.1	MSTRG.243909	0	104.112	Inf	Inf	0.0240157	1	Up	8	881		bgrcirc_013965	32.4426	98.2165	3.0274	1.59808	0.0382936	0.996154	Up
ENSBGRG00000005944	ASTN1	astrotactin 1 [Source:HGNC Symbol;Acc:HGNC:773]	12.2952	73.2734	5.95951	2.57519	0.0160592	1	Up	14	5368		MSTRG.47626.1	MSTRG.47626	0	103.348	Inf	Inf	0.0241606	1	Up	12	357		bgrcirc_000495	19.3473	0	0	-Inf	0.038831	0.996154	Down
ENSBGRG00000021648	ENPP1	ectonucleotide pyrophosphatase/phosphodiesterase 1 [Source:HGNC Symbol;Acc:HGNC:3356]	2322.04	1044.05	0.449629	-1.15319	0.0161197	1	Down	10	3212		MSTRG.206404.7	MSTRG.206404	103.38	0	0	-Inf	0.0244045	1	Down	5	577		bgrcirc_007625	19.3473	0	0	-Inf	0.038831	0.996154	Down
ENSBGRG00000015535	-	-	166.394	22.3676	0.134426	-2.89512	0.0161731	1	Down	24	2526		MSTRG.79118.1	MSTRG.79118	104.052	0	0	-Inf	0.024911	1	Down	16	686		bgrcirc_004651	19.3473	0	0	-Inf	0.038831	0.996154	Down
ENSBGRG00000003738	CC2D1B	coiled-coil and C2 domain containing 1B [Source:HGNC Symbol;Acc:HGNC:29386]	115.332	271.099	2.3506	1.23303	0.0162471	1	Up	3	3563		MSTRG.30581.1	MSTRG.30581	103.366	0	0	-Inf	0.0251311	1	Down	11	613		bgrcirc_005898	19.3473	0	0	-Inf	0.038831	0.996154	Down
ENSBGRG00000006287	TESK1	testis associated actin remodelling kinase 1 [Source:HGNC Symbol;Acc:HGNC:11731]	113.219	270.254	2.387	1.2552	0.0164233	1	Up	7	1884		MSTRG.108245.2	MSTRG.108245	2.1098	212.723	100.826	6.65573	0.0251536	1	Up	2	1465		bgrcirc_010206	19.3473	0	0	-Inf	0.038831	0.996154	Down
ENSBGRG00000006582	L3MBTL2	L3MBTL histone methyl-lysine binding protein 2 [Source:HGNC Symbol;Acc:HGNC:18594]	14.2159	83.2464	5.85585	2.54988	0.0164273	1	Up	5	2763		MSTRG.250253.1	MSTRG.250253	0	101.89	Inf	Inf	0.0252379	1	Up	8	479		bgrcirc_000858	19.3473	0	0	-Inf	0.038831	0.996154	Down
ENSBGRG00000020501	-	-	163.86	372.11	2.2709	1.18326	0.0165535	1	Up	20	1734		MSTRG.258650.11	MSTRG.258650	647.106	0	0	-Inf	0.0254777	1	Down	9	608		bgrcirc_017949	19.3473	0	0	-Inf	0.038831	0.996154	Down
ENSBGRG00000016750	TIPARP	TCDD inducible poly(ADP-ribose) polymerase [Source:HGNC Symbol;Acc:HGNC:23696]	878.514	326.251	0.371367	-1.42908	0.0166846	1	Down	1	2181		MSTRG.9632.3	MSTRG.9632	694.034	0	0	-Inf	0.0255658	1	Down	1	2318		bgrcirc_012041	164.943	62.9397	0.381585	-1.38992	0.0400638	0.996154	Down
ENSBGRG00000016563	-	-	37.4334	2.55365	0.0682184	-3.87369	0.0167271	1	Down	X	1011		MSTRG.225915.7	MSTRG.225915	101	0	0	-Inf	0.0257535	1	Down	6	569		bgrcirc_010905	66.8182	12.221	0.1829	-2.45088	0.0402567	0.996154	Down
ENSBGRG00000006516	SIX2	SIX homeobox 2 [Source:HGNC Symbol;Acc:HGNC:10888]	25.8431	110.569	4.27846	2.09709	0.0167889	1	Up	9	2268		MSTRG.187485.1	MSTRG.187485	101.35	0	0	-Inf	0.0258039	1	Down	3	983		bgrcirc_008777	31.6389	1.48369	0.0468944	-4.41444	0.0403386	0.996154	Down
ENSBGRG00000009694	KCNJ11	potassium inwardly rectifying channel subfamily J member 11 [Source:HGNC Symbol;Acc:HGNC:6257]	207.975	449.671	2.16214	1.11246	0.0168461	1	Up	13	1167		MSTRG.24376.2	MSTRG.24376	0	100.136	Inf	Inf	0.0260796	1	Up	10	979		bgrcirc_002892	19.611	0	0	-Inf	0.0404774	0.996154	Down
ENSBGRG00000015184	MEX3B	mex-3 RNA binding family member B [Source:HGNC Symbol;Acc:HGNC:25297]	4.12323	46.1759	11.199	3.48529	0.0169156	1	Up	17	1758		MSTRG.52311.3	MSTRG.52311	0	100.322	Inf	Inf	0.0264285	1	Up	13	340		bgrcirc_014475	43.723	4.71459	0.107829	-3.21319	0.0406928	0.996154	Down
ENSBGRG00000013230	POLR2E	RNA polymerase II subunit E [Source:HGNC Symbol;Acc:HGNC:9192]	102.193	251.63	2.4623	1.30001	0.0170043	1	Up	8	1274		MSTRG.84243.1	MSTRG.84243	0	98.8019	Inf	Inf	0.0269507	1	Up	17	664		bgrcirc_012798	0	20.2203	Inf	Inf	0.0407957	0.996154	Up
ENSBGRG00000024222	PPP1R3D	protein phosphatase 1 regulatory subunit 3D [Source:HGNC Symbol;Acc:HGNC:9294]	0	36.2486	Inf	Inf	0.0172914	1	Up	12	900		MSTRG.142199.3	MSTRG.142199	100.575	0	0	-Inf	0.0272056	1	Down	23	1526		bgrcirc_000631	35.2736	2.43052	0.0689047	-3.85925	0.04133	0.996154	Down
ENSBGRG00000004258	ANGPTL2	angiopoietin like 2 [Source:HGNC Symbol;Acc:HGNC:490]	153.185	338.588	2.21032	1.14426	0.0174393	1	Up	9	1953		MSTRG.188676.1	MSTRG.188676	100.872	0	0	-Inf	0.0277715	1	Down	4	1067		bgrcirc_017947	18.9267	0	0	-Inf	0.0418563	0.996154	Down
ENSBGRG00000008221	MAN2A2	mannosidase alpha class 2A member 2 [Source:HGNC Symbol;Acc:HGNC:6825]	225.324	460.878	2.0454	1.03239	0.0174813	1	Up	17	3453		MSTRG.53055.1	MSTRG.53055	0	98.4091	Inf	Inf	0.0277925	1	Up	13	838		bgrcirc_014999	18.9267	0	0	-Inf	0.0418563	0.996154	Down
ENSBGRG00000012223	KCNC1	potassium voltage-gated channel subfamily C member 1 [Source:HGNC Symbol;Acc:HGNC:6233]	212.444	456.186	2.14733	1.10254	0.0175692	1	Up	13	4555		MSTRG.63402.6	MSTRG.63402	0	98.0878	Inf	Inf	0.0278608	1	Up	14	443		bgrcirc_007009	18.9267	0	0	-Inf	0.0418563	0.996154	Down
ENSBGRG00000023917	CMTM8	CKLF like MARVEL transmembrane domain containing 8 [Source:HGNC Symbol;Acc:HGNC:19179]	1.62443	34.3227	21.129	4.40115	0.018225	1	Up	22	3404		MSTRG.213438.1	MSTRG.213438	100.586	0	0	-Inf	0.0278633	1	Down	5	568		bgrcirc_014186	18.9267	0	0	-Inf	0.0418563	0.996154	Down
ENSBGRG00000005985	WDR31	WD repeat domain 31 [Source:HGNC Symbol;Acc:HGNC:21421]	53.3309	8.08656	0.15163	-2.72137	0.018271	1	Down	7	1831		MSTRG.236152.2	MSTRG.236152	485.92	0	0	-Inf	0.0280902	1	Down	7	4149		bgrcirc_003057	18.9267	0	0	-Inf	0.0418563	0.996154	Down
ENSBGRG00000009196	SLC35C1	solute carrier family 35 member C1 [Source:HGNC Symbol;Acc:HGNC:20197]	0	20.6873	Inf	Inf	0.018286	1	Up	13	1839		MSTRG.51284.4	MSTRG.51284	564.21	0	0	-Inf	0.0283429	1	Down	13	2939		bgrcirc_013038	6.14579	40.1669	6.53568	2.70834	0.0420009	0.996154	Up
ENSBGRG00000002852	TUSC1	tumor suppressor candidate 1 [Source:HGNC Symbol;Acc:HGNC:31010]	0	20.9919	Inf	Inf	0.0185497	1	Up	7	639		MSTRG.54762.8	MSTRG.54762	0	471	Inf	Inf	0.0286686	1	Up	13	3263		bgrcirc_014537	55.6635	9.3121	0.167293	-2.57955	0.0420207	0.996154	Down
ENSBGRG00000024244	-	-	109.77	28.4146	0.258855	-1.94978	0.0187482	1	Down	20	1083		MSTRG.139484.1	MSTRG.139484	0	97.0308	Inf	Inf	0.0288278	1	Up	22	388		bgrcirc_004270	102.789	31.6943	0.308344	-1.69739	0.0420295	0.996154	Down
ENSBGRG00000024312	MED29	mediator complex subunit 29 [Source:HGNC Symbol;Acc:HGNC:23074]	69.7505	11.9706	0.17162	-2.54271	0.018782	1	Down	20	1292		MSTRG.162283.2	MSTRG.162283	0.272836	119.629	438.464	8.77632	0.0290069	1	Up	27	1008		bgrcirc_009411	19.1967	0	0	-Inf	0.0420619	0.996154	Down
ENSBGRG00000019632	PDLIM7	PDZ and LIM domain 7 [Source:HGNC Symbol;Acc:HGNC:22958]	355.788	1999.72	5.62055	2.49071	0.0188213	1	Up	8	2766		MSTRG.87160.1	MSTRG.87160	98.334	0	0	-Inf	0.0290412	1	Down	17	843		bgrcirc_001129	25.2356	0.546631	0.0216611	-5.52875	0.0429282	0.996154	Down
ENSBGRG00000009248	IL12RB2	interleukin 12 receptor subunit beta 2 [Source:HGNC Symbol;Acc:HGNC:5972]	33.7465	0	0	-Inf	0.0191888	1	Down	3	2622		MSTRG.145686.1	MSTRG.145686	0	96.043	Inf	Inf	0.0290612	1	Up	24	509		bgrcirc_008659	22.9758	0.405087	0.017631	-5.82574	0.0431137	0.996154	Down
ENSBGRG00000019378	CHPF	chondroitin polymerizing factor [Source:HGNC Symbol;Acc:HGNC:24291]	47.1935	168.612	3.57277	1.83704	0.0192377	1	Up	2	2328		MSTRG.235017.1	MSTRG.235017	97.0301	0	0	-Inf	0.0291702	1	Down	7	683		bgrcirc_001893	27.33	1.21526	0.0444662	-4.49115	0.0431251	0.996154	Down
ENSBGRG00000021751	-	-	1.04281	35.3992	33.946	5.08517	0.0194398	1	Up	16	2875		MSTRG.124088.17	MSTRG.124088	1194.97	0.319755	0.000267584	-11.8677	0.0291889	1	Down	20	2434		bgrcirc_014255	0	19.8884	Inf	Inf	0.0431588	0.996154	Up
ENSBGRG00000017954	CACNG1	calcium voltage-gated channel auxiliary subunit gamma 1 [Source:HGNC Symbol;Acc:HGNC:1405]	79.0745	341.313	4.31635	2.10981	0.0194802	1	Up	19	1040		MSTRG.125658.6	MSTRG.125658	0	487.434	Inf	Inf	0.0292214	1	Up	21	2795		bgrcirc_003667	19.1905	0	0	-Inf	0.0436407	0.996154	Down
ENSBGRG00000016775	MRM1	mitochondrial rRNA methyltransferase 1 [Source:HGNC Symbol;Acc:HGNC:26202]	13.4501	76.4087	5.68089	2.50612	0.0195284	1	Up	19	1083		MSTRG.30691.1	MSTRG.30691	0	95.7315	Inf	Inf	0.0293658	1	Up	11	577		bgrcirc_014841	0	19.2687	Inf	Inf	0.0441286	0.996154	Up
ENSBGRG00000015070	MAP7	microtubule associated protein 7 [Source:HGNC Symbol;Acc:HGNC:6869]	21.6367	0	0	-Inf	0.0196702	1	Down	10	3827		MSTRG.141114.1	MSTRG.141114	98.2111	0	0	-Inf	0.0297797	1	Down	23	585		bgrcirc_002917	19.0523	0	0	-Inf	0.0441862	0.996154	Down
ENSBGRG00000006087	KIAA1755	KIAA1755 [Source:HGNC Symbol;Acc:HGNC:29372]	9.12854	60.6457	6.64353	2.73195	0.0196804	1	Up	12	4199		MSTRG.30502.8	MSTRG.30502	95.4935	0	0	-Inf	0.0298298	1	Down	11	1949		bgrcirc_016785	0	19.2247	Inf	Inf	0.0443622	0.996154	Up
ENSBGRG00000010579	-	-	218.815	455.593	2.0821	1.05804	0.0198859	1	Up	19	1284		MSTRG.191066.3	MSTRG.191066	0.327839	117.136	357.298	8.48098	0.0300319	1	Up	4	1978		bgrcirc_003028	23.1077	0.405087	0.0175304	-5.834	0.0444293	0.996154	Down
ENSBGRG00000026877	-	-	163.987	356.973	2.17684	1.12224	0.0198859	1	Up	20	2628		MSTRG.239240.2	MSTRG.239240	96.4721	0	0	-Inf	0.0300736	1	Down	8	881		bgrcirc_017033	19.3223	0	0	-Inf	0.0449394	0.996154	Down
ENSBGRG00000008534	PEF1	penta-EF-hand domain containing 1 [Source:HGNC Symbol;Acc:HGNC:30009]	25.7918	122.067	4.73276	2.24268	0.0199408	1	Up	2	1017		MSTRG.264081.12	MSTRG.264081	461.142	0	0	-Inf	0.0301576	1	Down	VBZB01000110.1	351		bgrcirc_017320	18.5061	0	0	-Inf	0.0451168	0.996154	Down
ENSBGRG00000003576	KLB	klotho beta [Source:HGNC Symbol;Acc:HGNC:15527]	75.8576	4.7215	0.0622417	-4.00598	0.0201642	1	Down	6	2907		MSTRG.158702.1	MSTRG.158702	0	95.0015	Inf	Inf	0.0301925	1	Up	26	303		bgrcirc_012487	18.5061	0	0	-Inf	0.0451168	0.996154	Down
ENSBGRG00000007556	ST6GALNAC6	ST6 N-acetylgalactosaminide alpha-2,6- sialyltransferase 6 [Source:HGNC Symbol;Acc:HGNC:23364]	67.3919	191.011	2.83433	1.50301	0.0202122	1	Up	9	2455		MSTRG.223288.1	MSTRG.223288	0	95.5323	Inf	Inf	0.0303506	1	Up	6	1099		bgrcirc_015202	18.5061	0	0	-Inf	0.0451168	0.996154	Down
ENSBGRG00000001555	GNAI3	G protein subunit alpha i3 [Source:HGNC Symbol;Acc:HGNC:4387]	390.94	183.188	0.468584	-1.09362	0.0202617	1	Down	3	1852		MSTRG.151700.2	MSTRG.151700	95.6666	0	0	-Inf	0.0304819	1	Down	25	1002		bgrcirc_009525	18.5061	0	0	-Inf	0.0451168	0.996154	Down
ENSBGRG00000000800	CLDN1	claudin 1 [Source:HGNC Symbol;Acc:HGNC:2032]	38.9177	133.679	3.43491	1.78027	0.0202894	1	Up	1	2110		MSTRG.242642.1	MSTRG.242642	0	93.7522	Inf	Inf	0.0305928	1	Up	8	916		bgrcirc_001636	18.5061	0	0	-Inf	0.0451168	0.996154	Down
ENSBGRG00000019109	PDE9A	phosphodiesterase 9A [Source:HGNC Symbol;Acc:HGNC:8795]	13.235	73.6028	5.56124	2.47541	0.0203348	1	Up	1	3131		MSTRG.121097.13	MSTRG.121097	0	348.732	Inf	Inf	0.0305946	1	Up	20	4128		bgrcirc_000037	18.5061	0	0	-Inf	0.0451168	0.996154	Down
ENSBGRG00000012434	SLC7A10	solute carrier family 7 member 10 [Source:HGNC Symbol;Acc:HGNC:11058]	0	37.3259	Inf	Inf	0.0205111	1	Up	20	1709		MSTRG.273706.4	MSTRG.273706	2559.61	117.244	0.0458054	-4.44834	0.0309106	1	Down	X	5765		bgrcirc_006779	18.5061	0	0	-Inf	0.0451168	0.996154	Down
ENSBGRG00000003388	GPX7	glutathione peroxidase 7 [Source:HGNC Symbol;Acc:HGNC:4559]	17.8524	83.4628	4.67516	2.22502	0.0205741	1	Up	3	738		MSTRG.270098.1	MSTRG.270098	93.7807	0	0	-Inf	0.0313298	1	Down	X	384		bgrcirc_013443	17.6462	81.2033	4.60175	2.20218	0.0453566	0.996154	Up
ENSBGRG00000003715	RAB8B	RAB8B, member RAS oncogene family [Source:HGNC Symbol;Acc:HGNC:30273]	230.46	94.3935	0.409587	-1.28776	0.0208079	1	Down	11	2449		MSTRG.224589.3	MSTRG.224589	0	104.524	Inf	Inf	0.0315341	1	Up	6	370		bgrcirc_007867	2.23483	28.4196	12.7167	3.66865	0.0463286	0.996154	Up
ENSBGRG00000018685	GBGT1	globoside alpha-1,3-N- acetylgalactosaminyltransferase 1 (FORS blood group) [Source:HGNC Symbol;Acc:HGNC:20460]	4.34589	46.3248	10.6594	3.41406	0.020975	1	Up	9	2257		MSTRG.210744.2	MSTRG.210744	0	92.6409	Inf	Inf	0.0316063	1	Up	5	589		bgrcirc_017566	18.7699	0	0	-Inf	0.0470514	0.996154	Down
ENSBGRG00000025151	MARCHF2	membrane associated ring-CH-type finger 2 [Source:HGNC Symbol;Acc:HGNC:28038]	120.971	278.013	2.29818	1.20049	0.0211009	1	Up	8	1513		MSTRG.199739.1	MSTRG.199739	135.613	0.683638	0.0050411	-7.63205	0.0316502	1	Down	4	558		bgrcirc_013401	18.3618	0	0	-Inf	0.0472449	0.996154	Down
ENSBGRG00000022555	TRIM65	tripartite motif containing 65 [Source:HGNC Symbol;Acc:HGNC:27316]	29.1332	109.235	3.74949	1.9067	0.0211948	1	Up	19	1542		MSTRG.243797.1	MSTRG.243797	0	92.4013	Inf	Inf	0.0317474	1	Up	8	418		bgrcirc_006864	18.2237	0	0	-Inf	0.0479258	0.996154	Down
ENSBGRG00000026803	SEMA4C	semaphorin 4C [Source:HGNC Symbol;Acc:HGNC:10731]	41.2649	143.584	3.47956	1.79891	0.0214989	1	Up	9	4286		MSTRG.119323.3	MSTRG.119323	378.696	0	0	-Inf	0.0317983	1	Down	20	1436		bgrcirc_008592	18.2237	0	0	-Inf	0.0479258	0.996154	Down
ENSBGRG00000002976	UBE2K	ubiquitin conjugating enzyme E2 K [Source:HGNC Symbol;Acc:HGNC:4914]	232.774	98.7613	0.42428	-1.23691	0.0215288	1	Down	6	603		MSTRG.54723.9	MSTRG.54723	436.681	0	0	-Inf	0.0321972	1	Down	13	1453		bgrcirc_005621	24.3945	0.546631	0.022408	-5.47984	0.0484333	0.996154	Down
ENSBGRG00000017005	MTBP	MDM2 binding protein [Source:HGNC Symbol;Acc:HGNC:7417]	137.671	47.079	0.341967	-1.54807	0.0215546	1	Down	18	2706		MSTRG.208765.1	MSTRG.208765	0.3014	113.93	378.001	8.56225	0.0322189	1	Up	5	531		bgrcirc_009219	55.7384	8.75567	0.157085	-2.67038	0.0486178	0.996154	Down
ENSBGRG00000025201	NDUFAF8	NADH:ubiquinone oxidoreductase complex assembly factor 8 [Source:HGNC Symbol;Acc:HGNC:33551]	8.59053	59.89	6.97163	2.8015	0.0216206	1	Up	19	225		MSTRG.112517.1	MSTRG.112517	94.1479	0	0	-Inf	0.0323936	1	Down	2	954		bgrcirc_010020	18.0855	0	0	-Inf	0.0486309	0.996154	Down
ENSBGRG00000026391	CLCN7	chloride voltage-gated channel 7 [Source:HGNC Symbol;Acc:HGNC:2025]	135.809	309.968	2.28238	1.19054	0.0217926	1	Up	26	4729		MSTRG.191781.1	MSTRG.191781	93.9316	0	0	-Inf	0.0325906	1	Down	4	322		bgrcirc_003704	18.0855	0	0	-Inf	0.0486309	0.996154	Down
ENSBGRG00000001715	CAMLG	calcium modulating ligand [Source:HGNC Symbol;Acc:HGNC:1471]	319.381	140.006	0.438366	-1.18979	0.0218079	1	Down	8	1028		MSTRG.213722.4	MSTRG.213722	0	91.3536	Inf	Inf	0.0326906	1	Up	5	525		bgrcirc_004372	18.0855	0	0	-Inf	0.0486309	0.996154	Down
ENSBGRG00000026159	NME3	NME/NM23 nucleoside diphosphate kinase 3 [Source:HGNC Symbol;Acc:HGNC:7851]	2.15377	55.9858	25.9944	4.70013	0.0218415	1	Up	26	510		MSTRG.276946.1	MSTRG.276946	92.1378	0	0	-Inf	0.0329408	1	Down	Y	835		bgrcirc_006862	18.0855	0	0	-Inf	0.0486309	0.996154	Down
ENSBGRG00000013297	CRELD1	cysteine rich with EGF like domains 1 [Source:HGNC Symbol;Acc:HGNC:14630]	16.226	80.042	4.93294	2.30245	0.0218421	1	Up	22	3026		MSTRG.201577.1	MSTRG.201577	94.2007	0	0	-Inf	0.0329979	1	Down	5	750		bgrcirc_004724	18.0855	0	0	-Inf	0.0486309	0.996154	Down
ENSBGRG00000022526	ZNF524	zinc finger protein 524 [Source:HGNC Symbol;Acc:HGNC:28322]	7.00575	73.0723	10.4303	3.38271	0.0218924	1	Up	20	798		MSTRG.13325.1	MSTRG.13325	92.289	0	0	-Inf	0.0330226	1	Down	1	1094		bgrcirc_002705	18.7636	0	0	-Inf	0.0489975	0.996154	Down
ENSBGRG00000002480	SOX7	SRY-box transcription factor 7 [Source:HGNC Symbol;Acc:HGNC:18196]	0.609269	26.3345	43.2231	5.43373	0.0219708	1	Up	7	1991		MSTRG.150402.2	MSTRG.150402	93.727	0	0	-Inf	0.0331662	1	Down	25	969
ENSBGRG00000019857	APBA3	amyloid beta precursor protein binding family A member 3 [Source:HGNC Symbol;Acc:HGNC:580]	40.3506	148.219	3.67328	1.87707	0.0220189	1	Up	8	1758		MSTRG.263008.3	MSTRG.263008	0	90.4081	Inf	Inf	0.0335223	1	Up	9	749
ENSBGRG00000010677	VIT	vitrin [Source:HGNC Symbol;Acc:HGNC:12697]	250.435	110.905	0.44285	-1.17511	0.0222132	1	Down	9	2307		MSTRG.34686.1	MSTRG.34686	0	91.2644	Inf	Inf	0.0335646	1	Up	11	723
ENSBGRG00000022819	-	-	3.24887	40.4265	12.4432	3.63729	0.022241	1	Up	29	1719		MSTRG.252442.9	MSTRG.252442	0	90.3206	Inf	Inf	0.033826	1	Up	9	701
ENSBGRG00000007330	PARP9	poly(ADP-ribose) polymerase family member 9 [Source:HGNC Symbol;Acc:HGNC:24118]	282.919	121.714	0.43021	-1.21689	0.0222863	1	Down	1	3374		MSTRG.12648.4	MSTRG.12648	119.322	0	0	-Inf	0.0338452	1	Down	1	1189
ENSBGRG00000007466	DHRS3	dehydrogenase/reductase 3 [Source:HGNC Symbol;Acc:HGNC:17693]	202.996	422.054	2.07912	1.05598	0.0226584	1	Up	14	1219		MSTRG.49693.1	MSTRG.49693	92.4182	0	0	-Inf	0.0338814	1	Down	13	621
ENSBGRG00000025936	-	-	20.4885	0	0	-Inf	0.0226924	1	Down	24	1284		MSTRG.196940.2	MSTRG.196940	0	90.7789	Inf	Inf	0.0339557	1	Up	4	787
ENSBGRG00000014796	CDKL5	cyclin dependent kinase like 5 [Source:HGNC Symbol;Acc:HGNC:11411]	264.407	103.389	0.391022	-1.35468	0.0227039	1	Down	Y	2691		MSTRG.152366.3	MSTRG.152366	93.2537	0	0	-Inf	0.0341425	1	Down	25	1001
ENSBGRG00000001584	MLLT11	MLLT11 transcription factor 7 cofactor [Source:HGNC Symbol;Acc:HGNC:16997]	112.645	32.6665	0.289995	-1.7859	0.0228748	1	Down	3	273		MSTRG.182858.1	MSTRG.182858	0	90.3214	Inf	Inf	0.034163	1	Up	3	591
ENSBGRG00000012539	-	G protein-coupled receptor class C group 5 member C [Source:HGNC Symbol;Acc:HGNC:13309]	131.595	302.024	2.29511	1.19857	0.0230069	1	Up	19	4692		MSTRG.17689.1	MSTRG.17689	0	89.6089	Inf	Inf	0.0342014	1	Up	10	295
ENSBGRG00000000399	CRLF1	cytokine receptor like factor 1 [Source:HGNC Symbol;Acc:HGNC:2364]	0	19.5452	Inf	Inf	0.0230546	1	Up	8	2097		MSTRG.17182.2	MSTRG.17182	157.986	0	0	-Inf	0.034556	1	Down	10	2060
ENSBGRG00000009028	ZHX3	zinc fingers and homeoboxes 3 [Source:HGNC Symbol;Acc:HGNC:15935]	130.462	288.514	2.21147	1.14501	0.0230685	1	Up	12	2838		MSTRG.17824.1	MSTRG.17824	90.6006	0	0	-Inf	0.0345866	1	Down	10	457
ENSBGRG00000009514	ADAMTS12	ADAM metallopeptidase with thrombospondin type 1 motif 12 [Source:HGNC Symbol;Acc:HGNC:14605]	178.447	368.261	2.0637	1.04523	0.0234171	1	Up	23	6620		MSTRG.82202.2	MSTRG.82202	92.3348	0	0	-Inf	0.0347494	1	Down	17	371
ENSBGRG00000009321	RETREG3	reticulophagy regulator family member 3 [Source:HGNC Symbol;Acc:HGNC:27258]	168.413	347.975	2.0662	1.04698	0.0235347	1	Up	19	2401		MSTRG.117907.1	MSTRG.117907	0	89.0162	Inf	Inf	0.0347604	1	Up	20	392
ENSBGRG00000013318	ROGDI	rogdi atypical leucine zipper [Source:HGNC Symbol;Acc:HGNC:29478]	107.707	27.636	0.256585	-1.96249	0.0236234	1	Down	26	1921		MSTRG.2719.10	MSTRG.2719	0	340.794	Inf	Inf	0.0348854	1	Up	1	5442
ENSBGRG00000008978	PBXIP1	PBX homeobox interacting protein 1 [Source:HGNC Symbol;Acc:HGNC:21199]	187.925	522.396	2.77982	1.47499	0.0238064	1	Up	3	2639		MSTRG.154796.2	MSTRG.154796	155.874	1.36728	0.0087717	-6.83293	0.0351333	1	Down	25	672
ENSBGRG00000019917	VNN2	vanin 2 [Source:HGNC Symbol;Acc:HGNC:12706]	243.458	100.654	0.413436	-1.27426	0.0238969	1	Down	10	2822		MSTRG.128918.2	MSTRG.128918	0	89.1828	Inf	Inf	0.0351699	1	Up	21	776
ENSBGRG00000008312	-	-	136.333	43.7205	0.320688	-1.64076	0.0244518	1	Down	14	1575		MSTRG.146058.1	MSTRG.146058	90.7707	0	0	-Inf	0.0351943	1	Down	24	491
ENSBGRG00000015277	-	WASH complex subunit 1 [Source:HGNC Symbol;Acc:HGNC:24361]	167.609	426.439	2.54425	1.34724	0.0246619	1	Up	5	6531		MSTRG.198622.1	MSTRG.198622	0	89.3074	Inf	Inf	0.0352639	1	Up	4	530
ENSBGRG00000020907	-	-	16.8117	77.9482	4.63654	2.21305	0.0246771	1	Up	X	225		MSTRG.255401.1	MSTRG.255401	0	88.2059	Inf	Inf	0.0354793	1	Up	9	500
ENSBGRG00000014069	-	-	0	19.3231	Inf	Inf	0.0249215	1	Up	25	6230		MSTRG.154227.4	MSTRG.154227	4.36537	256.506	58.7593	5.87675	0.0357866	1	Up	25	1900
ENSBGRG00000025152	-	-	22.7873	0	0	-Inf	0.0251077	1	Down	19	2196		MSTRG.75018.9	MSTRG.75018	0	88.9935	Inf	Inf	0.0360212	1	Up	16	1062
ENSBGRG00000007557	B3GNTL1	UDP-GlcNAc:betaGal beta-1,3-N- acetylglucosaminyltransferase like 1 [Source:HGNC Symbol;Acc:HGNC:21727]	0	19.1727	Inf	Inf	0.0251193	1	Up	19	1107		MSTRG.118915.7	MSTRG.118915	0	88.596	Inf	Inf	0.0361085	1	Up	20	1575
ENSBGRG00000001779	TBC1D22A	TBC1 domain family member 22A [Source:HGNC Symbol;Acc:HGNC:1309]	17.3347	86.1318	4.96875	2.31288	0.0254337	1	Up	5	3854		MSTRG.46242.1	MSTRG.46242	90.7425	0	0	-Inf	0.0361297	1	Down	12	626
ENSBGRG00000010882	SPRY4	sprouty RTK signaling antagonist 4 [Source:HGNC Symbol;Acc:HGNC:15533]	27.3343	125.612	4.5954	2.20019	0.0254845	1	Up	8	966		MSTRG.140044.1	MSTRG.140044	90.2087	0	0	-Inf	0.0361465	1	Down	23	679
ENSBGRG00000010299	WRNIP1	WRN helicase interacting protein 1 [Source:HGNC Symbol;Acc:HGNC:20876]	143.317	303.365	2.11674	1.08184	0.0255284	1	Up	24	2324		MSTRG.99543.2	MSTRG.99543	88.3752	0	0	-Inf	0.0364371	1	Down	19	1191
ENSBGRG00000006741	-	-	168.275	374.097	2.22313	1.15259	0.0260376	1	Up	14	2665		MSTRG.41977.1	MSTRG.41977	0	87.1144	Inf	Inf	0.0365055	1	Up	12	330
ENSBGRG00000000638	USP44	ubiquitin specific peptidase 44 [Source:HGNC Symbol;Acc:HGNC:20064]	19.4544	0	0	-Inf	0.0262422	1	Down	5	3443		MSTRG.262124.11	MSTRG.262124	285.113	0	0	-Inf	0.0366141	1	Down	9	1427
ENSBGRG00000025318	BAHCC1	BAH domain and coiled-coil containing 1 [Source:HGNC Symbol;Acc:HGNC:29279]	53.6149	153.084	2.85526	1.51362	0.0266145	1	Up	19	10687		MSTRG.82367.2	MSTRG.82367	89.33	0	0	-Inf	0.0366369	1	Down	17	626
ENSBGRG00000022222	DIPK1C	divergent protein kinase domain 1C [Source:HGNC Symbol;Acc:HGNC:31729]	0	19.6686	Inf	Inf	0.0266407	1	Up	21	2135		MSTRG.119324.1	MSTRG.119324	126.836	0.634002	0.0049986	-7.64426	0.0367463	1	Down	20	422
ENSBGRG00000010363	GRINA	glutamate ionotropic receptor NMDA type subunit associated protein 1 [Source:HGNC Symbol;Acc:HGNC:4589]	13.5523	69.7741	5.14849	2.36415	0.0266836	1	Up	18	1125		MSTRG.6090.6	MSTRG.6090	0	87.4381	Inf	Inf	0.036825	1	Up	1	1658
ENSBGRG00000000154	RCAN1	regulator of calcineurin 1 [Source:HGNC Symbol;Acc:HGNC:3040]	89.0561	232.085	2.60605	1.38186	0.0267231	1	Up	1	1831		MSTRG.22264.1	MSTRG.22264	88.8222	0	0	-Inf	0.0369385	1	Down	10	387
ENSBGRG00000015582	EVI2B	ecotropic viral integration site 2B [Source:HGNC Symbol;Acc:HGNC:3500]	28.548	0.885282	0.0310102	-5.01111	0.0273053	1	Down	19	1446		MSTRG.138726.3	MSTRG.138726	332.416	8.55903	0.025748	-5.2794	0.0370337	1	Down	22	2366
ENSBGRG00000004562	ID3	inhibitor of DNA binding 3, HLH protein [Source:HGNC Symbol;Acc:HGNC:5362]	26.4921	132.147	4.98816	2.31851	0.027402	1	Up	2	436		MSTRG.81461.1	MSTRG.81461	88.6844	0	0	-Inf	0.0371847	1	Down	17	699
ENSBGRG00000007441	MEDAG	mesenteric estrogen dependent adipogenesis [Source:HGNC Symbol;Acc:HGNC:25926]	239.305	104.348	0.436045	-1.19745	0.0274099	1	Down	15	2194		MSTRG.217677.1	MSTRG.217677	87.9751	0	0	-Inf	0.0377187	1	Down	6	649
ENSBGRG00000012471	CXXC5	CXXC finger protein 5 [Source:HGNC Symbol;Acc:HGNC:26943]	140.057	299.041	2.13514	1.09433	0.0274757	1	Up	8	3128		MSTRG.128436.1	MSTRG.128436	87.4749	0	0	-Inf	0.0378116	1	Down	21	624
ENSBGRG00000019282	RABGGTA	Rab geranylgeranyltransferase subunit alpha [Source:HGNC Symbol;Acc:HGNC:9795]	143.683	333.95	2.32421	1.21674	0.0278277	1	Up	11	1837		MSTRG.256567.4	MSTRG.256567	87.6919	0	0	-Inf	0.0378621	1	Down	9	1178
ENSBGRG00000016458	-	-	0	19.5049	Inf	Inf	0.0285992	1	Up	24	381		MSTRG.253475.1	MSTRG.253475	0	86.1804	Inf	Inf	0.0379255	1	Up	9	514
ENSBGRG00000025467	KPTN	kaptin, actin binding protein [Source:HGNC Symbol;Acc:HGNC:6404]	19.0806	83.9656	4.40059	2.1377	0.0286886	1	Up	20	2415		MSTRG.105100.2	MSTRG.105100	0	85.7939	Inf	Inf	0.0379272	1	Up	2	917
ENSBGRG00000012878	JPH2	junctophilin 2 [Source:HGNC Symbol;Acc:HGNC:14202]	979.153	2229.99	2.27746	1.18743	0.028803	1	Up	12	1980		MSTRG.204372.4	MSTRG.204372	87.9756	0	0	-Inf	0.0379394	1	Down	5	1822
ENSBGRG00000007200	LMF1	lipase maturation factor 1 [Source:HGNC Symbol;Acc:HGNC:14154]	12.4297	64.7654	5.21054	2.38143	0.0290489	1	Up	26	2933		MSTRG.42867.6	MSTRG.42867	265.196	0	0	-Inf	0.0379542	1	Down	12	636
ENSBGRG00000012958	STAC2	SH3 and cysteine rich domain 2 [Source:HGNC Symbol;Acc:HGNC:23990]	0	18.9121	Inf	Inf	0.0290912	1	Up	19	2705		MSTRG.273768.2	MSTRG.273768	311.447	0	0	-Inf	0.0380876	1	Down	X	1668
ENSBGRG00000013203	-	-	0	18.3648	Inf	Inf	0.029244	1	Up	14	807		MSTRG.148082.1	MSTRG.148082	0	85.3344	Inf	Inf	0.0386568	1	Up	24	464
ENSBGRG00000014672	-	-	2.79604	39.8529	14.2534	3.83323	0.0292501	1	Up	14	1215		MSTRG.260061.4	MSTRG.260061	0	85.8452	Inf	Inf	0.0387622	1	Up	9	608
ENSBGRG00000013522	LGR5	leucine rich repeat containing G protein-coupled receptor 5 [Source:HGNC Symbol;Acc:HGNC:4504]	0	18.8743	Inf	Inf	0.0292531	1	Up	5	3229		MSTRG.147721.7	MSTRG.147721	0	254.206	Inf	Inf	0.0388961	1	Up	24	1008
ENSBGRG00000014725	MMP15	matrix metallopeptidase 15 [Source:HGNC Symbol;Acc:HGNC:7161]	80.1266	199.61	2.49119	1.31683	0.0292776	1	Up	20	2956		MSTRG.60315.2	MSTRG.60315	87.2855	0	0	-Inf	0.0389296	1	Down	14	551
ENSBGRG00000007476	TRIM8	tripartite motif containing 8 [Source:HGNC Symbol;Acc:HGNC:15579]	75.1035	186.724	2.48622	1.31395	0.029416	1	Up	25	1656		MSTRG.185431.1	MSTRG.185431	166.544	0	0	-Inf	0.0390453	1	Down	3	1027
ENSBGRG00000001765	DIP2A	disco interacting protein 2 homolog A [Source:HGNC Symbol;Acc:HGNC:17217]	133.168	291.936	2.19224	1.13241	0.0294375	1	Up	1	4729		MSTRG.265393.1	MSTRG.265393	85.0016	0	0	-Inf	0.0392088	1	Down	X	731
ENSBGRG00000002838	SUN2	Sad1 and UNC84 domain containing 2 [Source:HGNC Symbol;Acc:HGNC:14210]	258.344	534.307	2.0682	1.04837	0.0294889	1	Up	5	2318		MSTRG.173128.15	MSTRG.173128	125.245	0.661574	0.00528226	-7.56463	0.039284	1	Down	29	739
ENSBGRG00000013980	NUDCD3	NudC domain containing 3 [Source:HGNC Symbol;Acc:HGNC:22208]	398.83	899.303	2.25486	1.17303	0.0295851	1	Up	4	2735		MSTRG.184717.2	MSTRG.184717	238.756	0	0	-Inf	0.0393329	1	Down	3	3501
ENSBGRG00000014533	-	-	3.7782	58.063	15.3679	3.94185	0.0295919	1	Up	29	890		MSTRG.147721.10	MSTRG.147721	245.825	0	0	-Inf	0.03941	1	Down	24	1649
ENSBGRG00000025687	FBXW4	F-box and WD repeat domain containing 4 [Source:HGNC Symbol;Acc:HGNC:10847]	82.6173	200.07	2.42165	1.27599	0.0299374	1	Up	25	1935		MSTRG.174711.1	MSTRG.174711	0	118.64	Inf	Inf	0.0394106	1	Up	3	527
ENSBGRG00000010087	NSG1	neuronal vesicle trafficking associated 1 [Source:HGNC Symbol;Acc:HGNC:18790]	0	19.1056	Inf	Inf	0.0300184	1	Up	6	1596		MSTRG.57542.2	MSTRG.57542	7.7379	311.013	40.1934	5.32889	0.0395358	1	Up	14	1724
ENSBGRG00000021447	ERFE	erythroferrone [Source:HGNC Symbol;Acc:HGNC:26727]	27.9107	1.27682	0.0457468	-4.45018	0.0300732	1	Down	3	820		MSTRG.64522.4	MSTRG.64522	244.188	0	0	-Inf	0.0395408	1	Down	14	1243
ENSBGRG00000010797	FKBP10	FKBP prolyl isomerase 10 [Source:HGNC Symbol;Acc:HGNC:18169]	30.022	121.562	4.0491	2.0176	0.0303585	1	Up	19	3335		MSTRG.126195.3	MSTRG.126195	0	245.572	Inf	Inf	0.0395657	1	Up	21	1201
ENSBGRG00000026390	CABP1	calcium binding protein 1 [Source:HGNC Symbol;Acc:HGNC:1384]	0	18.1199	Inf	Inf	0.0303595	1	Up	16	1335		MSTRG.212036.12	MSTRG.212036	2.4112	259.874	107.778	6.75192	0.0395744	1	Up	5	3909
ENSBGRG00000001780	MCRS1	microspherule protein 1 [Source:HGNC Symbol;Acc:HGNC:6960]	79.6688	196.938	2.47196	1.30565	0.0304207	1	Up	5	2428		MSTRG.9632.4	MSTRG.9632	287.842	0	0	-Inf	0.0396082	1	Down	1	2146
ENSBGRG00000022035	DLK1	delta like non-canonical Notch ligand 1 [Source:HGNC Symbol;Acc:HGNC:2907]	24.6483	146.652	5.94976	2.57283	0.0305794	1	Up	17	2785		MSTRG.184106.1	MSTRG.184106	86.3337	0	0	-Inf	0.0396103	1	Down	3	464
ENSBGRG00000010215	ASB13	ankyrin repeat and SOCS box containing 13 [Source:HGNC Symbol;Acc:HGNC:19765]	124.02	36.1173	0.291221	-1.77981	0.0308657	1	Down	12	2494		MSTRG.66148.2	MSTRG.66148	286.531	0	0	-Inf	0.0396981	1	Down	15	437
ENSBGRG00000007929	-	-	19.0796	0	0	-Inf	0.0309072	1	Down	2	452		MSTRG.23146.1	MSTRG.23146	0	243.014	Inf	Inf	0.0397709	1	Up	10	3659
ENSBGRG00000021680	RRP1	ribosomal RNA processing 1 [Source:HGNC Symbol;Acc:HGNC:18785]	38.1481	118.78	3.11365	1.63861	0.0309912	1	Up	1	1925		MSTRG.220465.1	MSTRG.220465	85.9536	0	0	-Inf	0.0399979	1	Down	6	386
ENSBGRG00000000178	C3orf38	chromosome 3 open reading frame 38 [Source:HGNC Symbol;Acc:HGNC:28384]	218.422	95.0773	0.435293	-1.19994	0.0310901	1	Down	1	3404		MSTRG.6378.17	MSTRG.6378	0	240.136	Inf	Inf	0.0400056	1	Up	1	2909
ENSBGRG00000025396	FAM20C	FAM20C golgi associated secretory pathway kinase [Source:HGNC Symbol;Acc:HGNC:22140]	57.0964	153.54	2.68914	1.42715	0.0312943	1	Up	26	3007		MSTRG.175891.4	MSTRG.175891	0	84.3393	Inf	Inf	0.0400283	1	Up	3	681
ENSBGRG00000010913	GPAA1	glycosylphosphatidylinositol anchor attachment 1 [Source:HGNC Symbol;Acc:HGNC:4446]	86.4781	203.437	2.35246	1.23417	0.0313217	1	Up	18	2245		MSTRG.138838.30	MSTRG.138838	84.5486	0	0	-Inf	0.0400937	1	Down	22	798
ENSBGRG00000010063	C1QTNF3	C1q and TNF related 3 [Source:HGNC Symbol;Acc:HGNC:14326]	145.742	304.515	2.08941	1.0631	0.0315227	1	Up	23	1618		MSTRG.34395.3	MSTRG.34395	105.136	0.341819	0.00325121	-8.26481	0.040147	1	Down	11	5386
ENSBGRG00000012262	UNC93A	unc-93 homolog A [Source:HGNC Symbol;Acc:HGNC:12570]	22.1983	86.87	3.91337	1.96841	0.0315249	1	Up	10	2708		MSTRG.161092.7	MSTRG.161092	85.9303	0	0	-Inf	0.0402557	1	Down	27	765
ENSBGRG00000020093	-	-	18.8919	0	0	-Inf	0.0317187	1	Down	24	5185		MSTRG.240843.1	MSTRG.240843	85.8954	0	0	-Inf	0.040365	1	Down	8	404
ENSBGRG00000018161	PRKCA	protein kinase C alpha [Source:HGNC Symbol;Acc:HGNC:9393]	112.025	255.202	2.27808	1.18782	0.0317273	1	Up	19	2769		MSTRG.253168.1	MSTRG.253168	86.3582	0	0	-Inf	0.040394	1	Down	9	322
ENSBGRG00000011406	-	-	20266.4	51011.7	2.51705	1.33174	0.0317591	1	Up	5	1277		MSTRG.134530.4	MSTRG.134530	164.896	0	0	-Inf	0.0404618	1	Down	22	706
ENSBGRG00000025440	SERPINE1	serpin family E member 1 [Source:HGNC Symbol;Acc:HGNC:8583]	97.6387	28.2104	0.288927	-1.79122	0.0317991	1	Down	26	3496		MSTRG.149552.1	MSTRG.149552	86.5298	0	0	-Inf	0.0405042	1	Down	24	1182
ENSBGRG00000001061	-	-	128.643	43.2191	0.335962	-1.57363	0.0318134	1	Down	7	405		MSTRG.73797.1	MSTRG.73797	83.8286	0	0	-Inf	0.040558	1	Down	16	373
ENSBGRG00000015921	-	-	144.698	51.4881	0.355831	-1.49073	0.0321096	1	Down	20	2087		MSTRG.95170.1	MSTRG.95170	0	83.1449	Inf	Inf	0.0407851	1	Up	19	346
ENSBGRG00000021083	-	small nuclear ribonucleoprotein D2 polypeptide [Source:HGNC Symbol;Acc:HGNC:11159]	172.181	353.997	2.05596	1.03981	0.0321409	1	Up	20	2421		MSTRG.64748.1	MSTRG.64748	0	123.341	Inf	Inf	0.0407994	1	Up	14	931
ENSBGRG00000022713	SBK2	SH3 domain binding kinase family member 2 [Source:HGNC Symbol;Acc:HGNC:34416]	3.57376	164.372	45.9942	5.52338	0.0322104	1	Up	20	1696		MSTRG.172777.1	MSTRG.172777	84.9799	0	0	-Inf	0.0408072	1	Down	29	598
ENSBGRG00000003939	-	-	218.097	99.9107	0.458103	-1.12626	0.0322776	1	Down	15	1570		MSTRG.176808.1	MSTRG.176808	84.0617	0	0	-Inf	0.0408085	1	Down	3	834
ENSBGRG00000000358	PTMS	parathymosin [Source:HGNC Symbol;Acc:HGNC:9629]	184.611	373.752	2.02454	1.01759	0.032321	1	Up	5	688		MSTRG.165383.46	MSTRG.165383	268.828	0	0	-Inf	0.0409752	1	Down	27	660
ENSBGRG00000019079	-	CD55 molecule (Cromer blood group) [Source:HGNC Symbol;Acc:HGNC:2665]	332.482	145.293	0.436995	-1.19431	0.0326429	1	Down	14	3134		MSTRG.74428.2	MSTRG.74428	0	83.5594	Inf	Inf	0.0410724	1	Up	16	586
ENSBGRG00000008219	NAIF1	nuclear apoptosis inducing factor 1 [Source:HGNC Symbol;Acc:HGNC:25446]	7.12726	50.3408	7.06314	2.82031	0.0327108	1	Up	9	984		MSTRG.72985.1	MSTRG.72985	0	83.0074	Inf	Inf	0.0411052	1	Up	15	631
ENSBGRG00000002743	RARG	retinoic acid receptor gamma [Source:HGNC Symbol;Acc:HGNC:9866]	26.6528	95.8958	3.59796	1.84718	0.0328348	1	Up	5	2748		MSTRG.50628.1	MSTRG.50628	35.2307	767.724	21.7914	4.44568	0.041107	1	Up	13	280
ENSBGRG00000013000	NOS2	nitric oxide synthase 2 [Source:HGNC Symbol;Acc:HGNC:7873]	0	17.6343	Inf	Inf	0.0331774	1	Up	19	7895		MSTRG.145007.4	MSTRG.145007	1.63701	160.693	98.1623	6.6171	0.0411706	1	Up	24	531
ENSBGRG00000009325	ESF1	ESF1 nucleolar pre-rRNA processing protein homolog [Source:HGNC Symbol;Acc:HGNC:15898]	261.911	120.759	0.461069	-1.11695	0.0332265	1	Down	12	2616		MSTRG.51284.5	MSTRG.51284	0	226.387	Inf	Inf	0.0411875	1	Up	13	1855
ENSBGRG00000020745	PGP	phosphoglycolate phosphatase [Source:HGNC Symbol;Acc:HGNC:8909]	104.894	228.112	2.17469	1.12081	0.0333924	1	Up	26	1243		MSTRG.91903.2	MSTRG.91903	0	134.242	Inf	Inf	0.0412408	1	Up	18	1288
ENSBGRG00000021114	-	-	18.4913	0	0	-Inf	0.0335329	1	Down	23	1146		MSTRG.117549.1	MSTRG.117549	0	83.6811	Inf	Inf	0.0412935	1	Up	20	888
ENSBGRG00000026635	-	-	18.4479	0	0	-Inf	0.0337364	1	Down	29	189		MSTRG.14185.1	MSTRG.14185	0	83.5016	Inf	Inf	0.0413331	1	Up	1	540
ENSBGRG00000001762	STAT4	signal transducer and activator of transcription 4 [Source:HGNC Symbol;Acc:HGNC:11365]	32.4955	1.77056	0.0544864	-4.19796	0.0337584	1	Down	2	2976		MSTRG.51042.1	MSTRG.51042	0	83.1262	Inf	Inf	0.0414287	1	Up	13	335
ENSBGRG00000022648	TSHZ1	teashirt zinc finger homeobox 1 [Source:HGNC Symbol;Acc:HGNC:10669]	122.457	281.671	2.30017	1.20174	0.0338675	1	Up	21	4897		MSTRG.229944.13	MSTRG.229944	0	240.299	Inf	Inf	0.0414624	1	Up	7	2673
ENSBGRG00000013446	-	-	18.4177	0	0	-Inf	0.0338791	1	Down	X	903		MSTRG.239517.1	MSTRG.239517	84.7453	0	0	-Inf	0.0414948	1	Down	8	1428
ENSBGRG00000002816	SLC6A17	solute carrier family 6 member 17 [Source:HGNC Symbol;Acc:HGNC:31399]	3.94857	41.384	10.4808	3.38967	0.0338986	1	Up	3	5957		MSTRG.201183.4	MSTRG.201183	241.12	0	0	-Inf	0.0416211	1	Down	5	1244
ENSBGRG00000025739	USP42	ubiquitin specific peptidase 42 [Source:HGNC Symbol;Acc:HGNC:20068]	331.081	162.888	0.491988	-1.02331	0.0339127	1	Down	26	4799		MSTRG.88823.2	MSTRG.88823	0	83.2403	Inf	Inf	0.0417655	1	Up	18	998
ENSBGRG00000018133	-	-	59.3158	154.984	2.61287	1.38563	0.0342799	1	Up	8	1221		MSTRG.222498.5	MSTRG.222498	83.3576	0	0	-Inf	0.0418102	1	Down	6	2239
ENSBGRG00000009880	MACROD1	mono-ADP ribosylhydrolase 1 [Source:HGNC Symbol;Acc:HGNC:29598]	1318.39	2647.1	2.00783	1.00564	0.0342907	1	Up	29	939		MSTRG.91942.1	MSTRG.91942	0	83.2238	Inf	Inf	0.0418888	1	Up	18	606
ENSBGRG00000006836	CHPF2	chondroitin polymerizing factor 2 [Source:HGNC Symbol;Acc:HGNC:29270]	5.52308	44.0545	7.97644	2.99574	0.0343125	1	Up	4	2298		MSTRG.50736.1	MSTRG.50736	83.5863	0	0	-Inf	0.0419284	1	Down	13	784
ENSBGRG00000010067	GDF11	growth differentiation factor 11 [Source:HGNC Symbol;Acc:HGNC:4216]	86.4772	207.075	2.39456	1.25976	0.034428	1	Up	5	2209		MSTRG.112026.6	MSTRG.112026	83.2071	0	0	-Inf	0.0419435	1	Down	2	1139
ENSBGRG00000017965	-	-	10.0853	71.9212	7.13128	2.83416	0.0347172	1	Up	8	312		MSTRG.23201.3	MSTRG.23201	214.995	0	0	-Inf	0.0421181	1	Down	10	2687
ENSBGRG00000016028	H1-4	H1.4 linker histone, cluster member [Source:HGNC Symbol;Acc:HGNC:4718]	19.072	94.2369	4.94112	2.30484	0.0348539	1	Up	24	576		MSTRG.219539.1	MSTRG.219539	83.9186	0	0	-Inf	0.0421283	1	Down	6	359
ENSBGRG00000007823	CIAO3	cytosolic iron-sulfur assembly component 3 [Source:HGNC Symbol;Acc:HGNC:14179]	61.7134	160.46	2.60009	1.37856	0.0349542	1	Up	26	2718		MSTRG.7263.4	MSTRG.7263	0	90.4495	Inf	Inf	0.0421715	1	Up	1	412
ENSBGRG00000025913	MAP1S	microtubule associated protein 1S [Source:HGNC Symbol;Acc:HGNC:15715]	35.359	126.783	3.5856	1.84222	0.0349635	1	Up	8	3291		MSTRG.12333.1	MSTRG.12333	0	82.4983	Inf	Inf	0.0422793	1	Up	1	931
ENSBGRG00000021611	C19orf53	chromosome 19 open reading frame 53 [Source:HGNC Symbol;Acc:HGNC:24991]	20.0976	135.843	6.75913	2.75684	0.0351957	1	Up	8	297		MSTRG.203478.1	MSTRG.203478	84.3867	0	0	-Inf	0.042399	1	Down	5	569
ENSBGRG00000010476	GRIA3	glutamate ionotropic receptor AMPA type subunit 3 [Source:HGNC Symbol;Acc:HGNC:4573]	110.66	244.306	2.20771	1.14255	0.0355592	1	Up	X	3086		MSTRG.114751.1	MSTRG.114751	83.0159	0	0	-Inf	0.0425989	1	Down	2	659
ENSBGRG00000000934	ADAMTSL4	ADAMTS like 4 [Source:HGNC Symbol;Acc:HGNC:19706]	232.97	561.845	2.41166	1.27003	0.035762	1	Up	3	3581		MSTRG.146983.18	MSTRG.146983	25.3964	628.078	24.731	4.62825	0.0427252	1	Up	24	3872
ENSBGRG00000017016	CLEC11A	C-type lectin domain containing 11A [Source:HGNC Symbol;Acc:HGNC:10576]	0	17.2304	Inf	Inf	0.0358082	1	Up	20	1213		MSTRG.199733.1	MSTRG.199733	0	81.4415	Inf	Inf	0.0427518	1	Up	4	577
ENSBGRG00000006779	-	-	197.955	78.2606	0.395346	-1.33881	0.0359551	1	Down	15	426		MSTRG.155109.1	MSTRG.155109	0	81.8029	Inf	Inf	0.0427657	1	Up	26	503
ENSBGRG00000009361	STAB1	stabilin 1 [Source:HGNC Symbol;Acc:HGNC:18628]	146.867	422.686	2.87802	1.52508	0.0359944	1	Up	22	7707		MSTRG.167066.1	MSTRG.167066	0	81.6984	Inf	Inf	0.0428563	1	Up	28	583
ENSBGRG00000016242	-	-	1.68615	30.0128	17.7996	4.15377	0.0363797	1	Up	3	411		MSTRG.81919.36	MSTRG.81919	205.991	0	0	-Inf	0.0430207	1	Down	17	1882
ENSBGRG00000016319	-	-	29.1956	101.117	3.46344	1.79221	0.036447	1	Up	6	2584		MSTRG.160025.21	MSTRG.160025	138.724	0	0	-Inf	0.043024	1	Down	26	1394
ENSBGRG00000019931	MRPL2	mitochondrial ribosomal protein L2 [Source:HGNC Symbol;Acc:HGNC:14056]	87.0595	202.372	2.32453	1.21694	0.0365338	1	Up	24	1140		MSTRG.268550.3	MSTRG.268550	205.718	0	0	-Inf	0.043049	1	Down	X	1188
ENSBGRG00000021573	MRI1	methylthioribose-1-phosphate isomerase 1 [Source:HGNC Symbol;Acc:HGNC:28469]	15.3878	68.1694	4.4301	2.14734	0.0366144	1	Up	8	1297		MSTRG.33787.5	MSTRG.33787	204.627	0	0	-Inf	0.0431626	1	Down	11	551
ENSBGRG00000006702	GPX3	glutathione peroxidase 3 [Source:HGNC Symbol;Acc:HGNC:4555]	480.271	140.496	0.292535	-1.77332	0.0366808	1	Down	8	2666		MSTRG.167924.2	MSTRG.167924	83.3279	0	0	-Inf	0.0431641	1	Down	28	657
ENSBGRG00000021906	WTIP	WT1 interacting protein [Source:HGNC Symbol;Acc:HGNC:20964]	189.433	73.92	0.390217	-1.35765	0.0366931	1	Down	20	4797		MSTRG.257098.1	MSTRG.257098	0	81.892	Inf	Inf	0.0433599	1	Up	9	609
ENSBGRG00000026078	-	-	49.3578	5.31169	0.107616	-3.21604	0.0368204	1	Down	27	562		MSTRG.167210.1	MSTRG.167210	0	81.1189	Inf	Inf	0.0433641	1	Up	28	646
ENSBGRG00000004131	JRK	Jrk helix-turn-helix protein [Source:HGNC Symbol;Acc:HGNC:6199]	16.4081	72.3158	4.40733	2.1399	0.0368956	1	Up	18	1791		MSTRG.224088.3	MSTRG.224088	77.7838	1979.08	25.4433	4.66922	0.0435235	1	Up	6	8271
ENSBGRG00000023942	CXXC1	CXXC finger protein 1 [Source:HGNC Symbol;Acc:HGNC:24343]	62.8202	162.295	2.58349	1.36932	0.0370201	1	Up	21	2275		MSTRG.54225.1	MSTRG.54225	82.3634	0	0	-Inf	0.0435274	1	Down	13	939
ENSBGRG00000018673	-	-	9.56434	56.014	5.85654	2.55005	0.0370371	1	Up	29	294		MSTRG.141095.1	MSTRG.141095	0	81.5114	Inf	Inf	0.0435797	1	Up	23	366
ENSBGRG00000018757	SLC37A1	solute carrier family 37 member 1 [Source:HGNC Symbol;Acc:HGNC:11024]	0.649774	23.4433	36.0792	5.17309	0.0371872	1	Up	1	3540		MSTRG.264088.9	MSTRG.264088	0	201.766	Inf	Inf	0.0435959	1	Up	VBZB01000113.1	1099
ENSBGRG00000000977	CERS1	ceramide synthase 1 [Source:HGNC Symbol;Acc:HGNC:14253]	69.381	171.778	2.47587	1.30793	0.0372636	1	Up	8	5439		MSTRG.15388.1	MSTRG.15388	3.8197	217.721	56.9995	5.83288	0.0436074	1	Up	10	1028
ENSBGRG00000004551	CTTNBP2NL	CTTNBP2 N-terminal like [Source:HGNC Symbol;Acc:HGNC:25330]	214.015	100.328	0.468789	-1.09299	0.0378685	1	Down	3	2053		MSTRG.47831.6	MSTRG.47831	0.655677	113.905	173.721	7.44063	0.0436259	1	Up	13	973
ENSBGRG00000022237	SLC26A11	solute carrier family 26 member 11 [Source:HGNC Symbol;Acc:HGNC:14471]	20.1425	82.5694	4.09925	2.03536	0.0380213	1	Up	19	2974		MSTRG.83038.1	MSTRG.83038	83.5858	0	0	-Inf	0.0436434	1	Down	17	316
ENSBGRG00000009004	BBLN	chromosome 9 open reading frame 16 [Source:HGNC Symbol;Acc:HGNC:17823]	9.93379	81.4302	8.19729	3.03515	0.038105	1	Up	9	252		MSTRG.189866.3	MSTRG.189866	0	106.104	Inf	Inf	0.0436667	1	Up	4	1202
ENSBGRG00000005255	COL5A1	collagen type V alpha 1 chain [Source:HGNC Symbol;Acc:HGNC:2209]	1044.17	2150.69	2.05971	1.04244	0.0385327	1	Up	9	7748		MSTRG.166950.1	MSTRG.166950	82.398	0	0	-Inf	0.0438391	1	Down	28	550
ENSBGRG00000000646	-	-	205.409	95.9604	0.467168	-1.09799	0.0386552	1	Down	7	1305		MSTRG.97925.10	MSTRG.97925	216.405	0	0	-Inf	0.0439143	1	Down	19	1578
ENSBGRG00000005249	CHKB	choline kinase beta [Source:HGNC Symbol;Acc:HGNC:1938]	50.3714	137.622	2.73214	1.45003	0.038707	1	Up	5	1720		MSTRG.43420.2	MSTRG.43420	83.0798	0	0	-Inf	0.0441034	1	Down	12	991
ENSBGRG00000009986	AMER1	APC membrane recruitment protein 1 [Source:HGNC Symbol;Acc:HGNC:26837]	143.863	299.615	2.08265	1.05842	0.0388634	1	Up	X	3354		MSTRG.25696.2	MSTRG.25696	0	80.3829	Inf	Inf	0.044135	1	Up	10	418
ENSBGRG00000006232	RUNDC1	RUN domain containing 1 [Source:HGNC Symbol;Acc:HGNC:25418]	32.8152	107.55	3.27745	1.71257	0.0389916	1	Up	19	2168		MSTRG.145105.1	MSTRG.145105	0	80.2644	Inf	Inf	0.0442427	1	Up	24	449
ENSBGRG00000001376	DNAH7	dynein axonemal heavy chain 7 [Source:HGNC Symbol;Acc:HGNC:18661]	82.5722	22.0927	0.267556	-1.90209	0.0393726	1	Down	2	14015		MSTRG.163310.12	MSTRG.163310	0	193.371	Inf	Inf	0.0443109	1	Up	27	3938
ENSBGRG00000008364	ORAI1	ORAI calcium release-activated calcium modulator 1 [Source:HGNC Symbol;Acc:HGNC:25896]	37.6554	118.709	3.15252	1.65651	0.0394515	1	Up	16	906		MSTRG.268351.3	MSTRG.268351	0	109.004	Inf	Inf	0.0443838	1	Up	X	516
ENSBGRG00000010936	NAA38	N(alpha)-acetyltransferase 38, NatC auxiliary subunit [Source:HGNC Symbol;Acc:HGNC:28212]	24.6364	87.414	3.54816	1.82707	0.0395661	1	Up	19	892		MSTRG.218904.1	MSTRG.218904	0	80.3278	Inf	Inf	0.0444123	1	Up	6	397
ENSBGRG00000005603	TMEM106A	transmembrane protein 106A [Source:HGNC Symbol;Acc:HGNC:28288]	17.1984	70.8279	4.11828	2.04204	0.0397185	1	Up	19	2064		MSTRG.87191.8	MSTRG.87191	82.7158	0	0	-Inf	0.0446241	1	Down	17	1201
ENSBGRG00000025223	NOP53	NOP53 ribosome biogenesis factor [Source:HGNC Symbol;Acc:HGNC:4333]	154.666	310.413	2.00699	1.00504	0.0397337	1	Up	20	1936		MSTRG.94533.7	MSTRG.94533	224.897	0	0	-Inf	0.0447685	1	Down	18	2668
ENSBGRG00000016481	-	-	80.809	198.238	2.45316	1.29464	0.0397725	1	Up	5	447		MSTRG.188630.14	MSTRG.188630	0	106.401	Inf	Inf	0.0448719	1	Up	4	878
ENSBGRG00000000821	-	-	0	18.2105	Inf	Inf	0.0398139	1	Up	1	1175		MSTRG.10743.59	MSTRG.10743	207.062	0	0	-Inf	0.0448858	1	Down	1	2515
ENSBGRG00000013061	-	RAB11 family interacting protein 5 [Source:HGNC Symbol;Acc:HGNC:24845]	37.0628	130.45	3.51971	1.81546	0.0399188	1	Up	9	4428		MSTRG.112733.1	MSTRG.112733	0	79.724	Inf	Inf	0.0449678	1	Up	2	304
ENSBGRG00000001699	SEMA6C	semaphorin 6C [Source:HGNC Symbol;Acc:HGNC:10740]	298.424	720.924	2.41577	1.27248	0.0401643	1	Up	3	3145		MSTRG.264017.19	MSTRG.264017	0	203.724	Inf	Inf	0.0449838	1	Up	VBZB01000090.1	483
ENSBGRG00000004297	LYNX1	Ly6/neurotoxin 1 [Source:HGNC Symbol;Acc:HGNC:29604]	409.704	875.946	2.138	1.09626	0.0402193	1	Up	18	1241		MSTRG.239143.1	MSTRG.239143	0	79.6855	Inf	Inf	0.0450036	1	Up	8	275
ENSBGRG00000021575	CLN5	CLN5 intracellular trafficking protein [Source:HGNC Symbol;Acc:HGNC:2076]	329.756	156.458	0.474466	-1.07562	0.040504	1	Down	15	2929		MSTRG.121271.1	MSTRG.121271	135.733	1.36728	0.0100733	-6.63333	0.0451991	1	Down	20	316
ENSBGRG00000024783	-	-	187.518	382.978	2.04235	1.03023	0.0405155	1	Up	12	630		MSTRG.259138.1	MSTRG.259138	0	79.9125	Inf	Inf	0.045259	1	Up	9	664
ENSBGRG00000015700	MFSD14B	major facilitator superfamily domain containing 14B [Source:HGNC Symbol;Acc:HGNC:23376]	144.708	56.4591	0.390159	-1.35787	0.0409336	1	Down	7	1607		MSTRG.94491.2	MSTRG.94491	199.761	0	0	-Inf	0.0453296	1	Down	18	913
ENSBGRG00000002583	MELK	maternal embryonic leucine zipper kinase [Source:HGNC Symbol;Acc:HGNC:16870]	0	17.1106	Inf	Inf	0.0411069	1	Up	7	2810		MSTRG.189863.2	MSTRG.189863	483.69	0.683638	0.00141338	-9.46664	0.0453663	1	Down	4	5488
ENSBGRG00000011997	LHFPL6	LHFPL tetraspan subfamily member 6 [Source:HGNC Symbol;Acc:HGNC:6586]	83.6601	276.546	3.30559	1.72491	0.0411249	1	Up	15	3391		MSTRG.45836.3	MSTRG.45836	102.253	0.317001	0.00310017	-8.33344	0.045512	1	Down	12	1394
ENSBGRG00000003422	C1QA	complement C1q A chain [Source:HGNC Symbol;Acc:HGNC:1241]	39.3601	116.985	2.97218	1.57152	0.0413788	1	Up	2	1069		MSTRG.162941.3	MSTRG.162941	0	195.179	Inf	Inf	0.045945	1	Up	27	4746
ENSBGRG00000023169	CPT1C	carnitine palmitoyltransferase 1C [Source:HGNC Symbol;Acc:HGNC:18540]	1.29955	40.8398	31.4262	4.9739	0.0418329	1	Up	20	3076		MSTRG.122378.2	MSTRG.122378	81.304	0	0	-Inf	0.0460612	1	Down	20	1423
ENSBGRG00000012277	RRP7A	ribosomal RNA processing 7 homolog A [Source:HGNC Symbol;Acc:HGNC:24286]	57.5041	167.224	2.90804	1.54005	0.041837	1	Up	5	3678		MSTRG.234994.1	MSTRG.234994	80.4934	0	0	-Inf	0.0461083	1	Down	7	582
ENSBGRG00000024818	MMP23B	matrix metallopeptidase 23B [Source:HGNC Symbol;Acc:HGNC:7171]	4.30753	37.8023	8.77586	3.13354	0.0418454	1	Up	14	1182		MSTRG.208170.1	MSTRG.208170	0	79.1344	Inf	Inf	0.0461111	1	Up	5	694
ENSBGRG00000017686	ACSM5	acyl-CoA synthetase medium chain family member 5 [Source:HGNC Symbol;Acc:HGNC:26060]	111.106	238.887	2.15008	1.10439	0.0419196	1	Up	26	2938		MSTRG.96403.1	MSTRG.96403	79.9207	0	0	-Inf	0.0461357	1	Down	19	740
ENSBGRG00000026571	-	-	594.427	1368.24	2.30178	1.20275	0.0419209	1	Up	10	1498		MSTRG.156322.1	MSTRG.156322	80.4138	0	0	-Inf	0.0461872	1	Down	26	892
ENSBGRG00000009080	PYGO2	pygopus family PHD finger 2 [Source:HGNC Symbol;Acc:HGNC:30257]	23.0484	102.683	4.45512	2.15546	0.0420103	1	Up	3	1218		MSTRG.221868.7	MSTRG.221868	0	192.102	Inf	Inf	0.0463065	1	Up	6	3181
ENSBGRG00000013821	PTGS1	prostaglandin-endoperoxide synthase 1 [Source:HGNC Symbol;Acc:HGNC:9604]	22.9568	82.7876	3.60623	1.85049	0.0421789	1	Up	9	2208		MSTRG.141938.2	MSTRG.141938	79.2248	0	0	-Inf	0.0463972	1	Down	23	590
ENSBGRG00000009515	DPP7	dipeptidyl peptidase 7 [Source:HGNC Symbol;Acc:HGNC:14892]	0.324887	19.9177	61.3065	5.93797	0.0422195	1	Up	9	1874		MSTRG.2996.1	MSTRG.2996	81.2413	0	0	-Inf	0.0464114	1	Down	1	453
ENSBGRG00000002470	DNAJB14	DnaJ heat shock protein family (Hsp40) member B14 [Source:HGNC Symbol;Acc:HGNC:25881]	122.107	44.8571	0.367359	-1.44474	0.0422325	1	Down	6	1841		MSTRG.35008.1	MSTRG.35008	0	78.6931	Inf	Inf	0.0465353	1	Up	11	417
ENSBGRG00000020254	DSEL	dermatan sulfate epimerase like [Source:HGNC Symbol;Acc:HGNC:18144]	64.4142	163.004	2.53056	1.33946	0.0426019	1	Up	21	4238		MSTRG.14793.1	MSTRG.14793	0	121.809	Inf	Inf	0.0468075	1	Up	1	636
ENSBGRG00000023218	TRPM3	transient receptor potential cation channel subfamily M member 3 [Source:HGNC Symbol;Acc:HGNC:17992]	141.805	54.5151	0.384438	-1.37918	0.0426027	1	Down	7	6918		MSTRG.38628.3	MSTRG.38628	172.705	0	0	-Inf	0.0469452	1	Down	12	443
ENSBGRG00000015411	-	-	11.7617	83.9255	7.13548	2.83501	0.0427116	1	Up	24	411		MSTRG.165686.21	MSTRG.165686	0	79.5277	Inf	Inf	0.0469699	1	Up	27	1186
ENSBGRG00000001242	ADGRE3	adhesion G protein-coupled receptor E3 [Source:HGNC Symbol;Acc:HGNC:23647]	26.137	0	0	-Inf	0.042902	1	Down	8	1364		MSTRG.190999.1	MSTRG.190999	0	78.7158	Inf	Inf	0.0470021	1	Up	4	813
ENSBGRG00000014312	MCAT	malonyl-CoA-acyl carrier protein transacylase [Source:HGNC Symbol;Acc:HGNC:29622]	90.1871	202.779	2.24842	1.16891	0.0429458	1	Up	5	2363		MSTRG.66132.1	MSTRG.66132	172.159	0	0	-Inf	0.0470188	1	Down	15	354
ENSBGRG00000015903	-	small nuclear ribonucleoprotein polypeptide A' [Source:HGNC Symbol;Acc:HGNC:11152]	162.78	61.8845	0.380173	-1.39527	0.0430768	1	Down	17	2712		MSTRG.247057.1	MSTRG.247057	0	78.4177	Inf	Inf	0.047047	1	Up	8	365
ENSBGRG00000000549	ATG101	autophagy related 101 [Source:HGNC Symbol;Acc:HGNC:25679]	24.8935	85.3251	3.42761	1.7772	0.043077	1	Up	5	1527		MSTRG.49459.22	MSTRG.49459	134.742	0	0	-Inf	0.0470515	1	Down	13	1989
ENSBGRG00000021566	PKHD1	PKHD1 ciliary IPT domain containing fibrocystin/polyductin [Source:HGNC Symbol;Acc:HGNC:9016]	0	16.4896	Inf	Inf	0.0430895	1	Up	24	13418		MSTRG.130255.2	MSTRG.130255	0	78.8655	Inf	Inf	0.0471053	1	Up	21	313
ENSBGRG00000019762	PLSCR3	phospholipid scramblase 3 [Source:HGNC Symbol;Acc:HGNC:16495]	19.1571	75.9675	3.96551	1.98751	0.0432715	1	Up	19	1022		MSTRG.43252.2	MSTRG.43252	81.1229	0	0	-Inf	0.0472247	1	Down	12	321
ENSBGRG00000023705	MAK16	MAK16 homolog [Source:HGNC Symbol;Acc:HGNC:13703]	198.665	88.3257	0.444597	-1.16943	0.0433698	1	Down	28	2131		MSTRG.174648.1	MSTRG.174648	79.6836	0	0	-Inf	0.0472956	1	Down	3	620
ENSBGRG00000015628	EMC9	ER membrane protein complex subunit 9 [Source:HGNC Symbol;Acc:HGNC:20273]	126.426	267.551	2.11627	1.08152	0.0434558	1	Up	11	627		MSTRG.175993.1	MSTRG.175993	0	78.5204	Inf	Inf	0.0474429	1	Up	3	472
ENSBGRG00000022119	CABIN1	calcineurin binding protein 1 [Source:HGNC Symbol;Acc:HGNC:24187]	129.409	265.606	2.05245	1.03735	0.0435386	1	Up	16	7237		MSTRG.31859.1	MSTRG.31859	79.3925	0	0	-Inf	0.0475941	1	Down	11	401
ENSBGRG00000022186	NXT2	nuclear transport factor 2 like export factor 2 [Source:HGNC Symbol;Acc:HGNC:18151]	77.5942	20.9778	0.270352	-1.88709	0.0436308	1	Down	X	2467		MSTRG.98762.41	MSTRG.98762	121.967	0	0	-Inf	0.0477627	1	Down	19	1436
ENSBGRG00000007052	NTN4	netrin 4 [Source:HGNC Symbol;Acc:HGNC:13658]	228.139	103.82	0.455074	-1.13583	0.0436441	1	Down	5	2930		MSTRG.114080.6	MSTRG.114080	92.2261	0	0	-Inf	0.0478524	1	Down	2	1155
ENSBGRG00000007398	PEAR1	platelet endothelial aggregation receptor 1 [Source:HGNC Symbol;Acc:HGNC:33631]	78.7457	197.646	2.50993	1.32765	0.0438665	1	Up	3	3345		MSTRG.41532.2	MSTRG.41532	80.2114	0	0	-Inf	0.0479367	1	Down	12	755
ENSBGRG00000019080	TBPL1	TATA-box binding protein like 1 [Source:HGNC Symbol;Acc:HGNC:11589]	178.948	78.8881	0.440844	-1.18166	0.0439697	1	Down	10	986		MSTRG.256188.3	MSTRG.256188	0	77.472	Inf	Inf	0.0479882	1	Up	9	440
ENSBGRG00000016804	PDRG1	p53 and DNA damage regulated 1 [Source:HGNC Symbol;Acc:HGNC:16119]	85.6992	205.683	2.40005	1.26307	0.0441396	1	Up	12	1228		MSTRG.30940.1	MSTRG.30940	180.539	0	0	-Inf	0.0480401	1	Down	11	1073
ENSBGRG00000022885	ZNF628	zinc finger protein 628 [Source:HGNC Symbol;Acc:HGNC:28054]	18.9274	72.6887	3.84039	1.94125	0.0441817	1	Up	20	3090		MSTRG.4471.2	MSTRG.4471	78.756	0	0	-Inf	0.0480658	1	Down	1	547
ENSBGRG00000013383	ELN	elastin [Source:HGNC Symbol;Acc:HGNC:3327]	241.88	6367.81	26.3264	4.71844	0.0442009	1	Up	26	3348		MSTRG.177782.1	MSTRG.177782	78.3048	0	0	-Inf	0.0480727	1	Down	3	566
ENSBGRG00000011587	MZB1	marginal zone B and B1 cell specific protein [Source:HGNC Symbol;Acc:HGNC:30125]	0.304635	20.2515	66.478	6.0548	0.0444589	1	Up	8	791		MSTRG.178803.10	MSTRG.178803	0	77.9442	Inf	Inf	0.0481422	1	Up	3	683
ENSBGRG00000011659	PROB1	proline rich basic protein 1 [Source:HGNC Symbol;Acc:HGNC:41906]	304.306	709.672	2.3321	1.22163	0.0445694	1	Up	8	3057		MSTRG.123449.3	MSTRG.123449	0	77.6793	Inf	Inf	0.0481549	1	Up	20	365
ENSBGRG00000006635	-	-	15.2651	70.2444	4.60165	2.20215	0.0446073	1	Up	6	1284		MSTRG.188458.1	MSTRG.188458	79.5961	0	0	-Inf	0.0481647	1	Down	4	617
ENSBGRG00000000445	-	-	20.3576	0.425608	0.0209066	-5.5799	0.044615	1	Down	8	1032		MSTRG.186819.1	MSTRG.186819	79.0592	0	0	-Inf	0.0483269	1	Down	3	363
ENSBGRG00000014985	-	-	225.741	100.408	0.444791	-1.1688	0.0446481	1	Down	3	525		MSTRG.175233.1	MSTRG.175233	78.757	0	0	-Inf	0.048449	1	Down	3	601
ENSBGRG00000016378	HEPACAM2	HEPACAM family member 2 [Source:HGNC Symbol;Acc:HGNC:27364]	20.3502	0.425608	0.0209142	-5.57937	0.0446532	1	Down	4	1515		MSTRG.190068.3	MSTRG.190068	175.716	0	0	-Inf	0.0486885	1	Down	4	1798
ENSBGRG00000024633	CENPT	centromere protein T [Source:HGNC Symbol;Acc:HGNC:25787]	0.913904	24.4102	26.7098	4.7393	0.0446829	1	Up	20	2319		MSTRG.159322.3	MSTRG.159322	0	77.3795	Inf	Inf	0.0491038	1	Up	26	508
ENSBGRG00000005205	PLEKHB1	pleckstrin homology domain containing B1 [Source:HGNC Symbol;Acc:HGNC:19079]	36.44	115.23	3.16219	1.66093	0.0446953	1	Up	13	1011		ENSBGRT00000044531	ENSBGRG00000024123	0	76.8412	Inf	Inf	0.0491404	1	Up	26	1505
ENSBGRG00000008928	VEGFC	vascular endothelial growth factor C [Source:HGNC Symbol;Acc:HGNC:12682]	9.42257	56.2611	5.97089	2.57795	0.0447246	1	Up	28	1260		MSTRG.36416.26	MSTRG.36416	0	76.8054	Inf	Inf	0.0491776	1	Up	11	666
ENSBGRG00000026152	MRPS34	mitochondrial ribosomal protein S34 [Source:HGNC Symbol;Acc:HGNC:16618]	60.9054	157.458	2.58528	1.37032	0.0447252	1	Up	26	657		MSTRG.151342.1	MSTRG.151342	78.5803	0	0	-Inf	0.0493333	1	Down	25	488
ENSBGRG00000024893	QSOX2	quiescin sulfhydryl oxidase 2 [Source:HGNC Symbol;Acc:HGNC:30249]	70.6233	177.297	2.51046	1.32795	0.0448994	1	Up	9	4332		MSTRG.66087.1	MSTRG.66087	77.518	0	0	-Inf	0.0493921	1	Down	15	893
ENSBGRG00000003874	ANKAR	ankyrin and armadillo repeat containing [Source:HGNC Symbol;Acc:HGNC:26350]	17.1984	0	0	-Inf	0.0449755	1	Down	2	4302		MSTRG.36324.3	MSTRG.36324	155.789	0	0	-Inf	0.0494019	1	Down	11	3676
ENSBGRG00000007003	LRWD1	leucine rich repeats and WD repeat domain containing 1 [Source:HGNC Symbol;Acc:HGNC:21769]	27.9512	96.3999	3.44887	1.78612	0.04499	1	Up	26	2729		MSTRG.14881.1	MSTRG.14881	0	76.6318	Inf	Inf	0.0496183	1	Up	1	817
ENSBGRG00000005237	DUS1L	dihydrouridine synthase 1 like [Source:HGNC Symbol;Acc:HGNC:30086]	29.0211	93.4351	3.21955	1.68686	0.0452324	1	Up	19	1907		MSTRG.252118.2	MSTRG.252118	0	76.1852	Inf	Inf	0.0498289	1	Up	9	884
ENSBGRG00000016287	FANCE	FA complementation group E [Source:HGNC Symbol;Acc:HGNC:3586]	22.6191	83.4519	3.68945	1.88341	0.0454556	1	Up	24	3233		MSTRG.62018.1	MSTRG.62018	0	76.5329	Inf	Inf	0.0498537	1	Up	14	434
ENSBGRG00000026704	ARHGEF15	Rho guanine nucleotide exchange factor 15 [Source:HGNC Symbol;Acc:HGNC:15590]	27.0158	88.4001	3.27216	1.71024	0.0455564	1	Up	19	2481
ENSBGRG00000019082	ZNF599	zinc finger protein 599 [Source:HGNC Symbol;Acc:HGNC:26408]	280.458	137.31	0.489592	-1.03035	0.0457146	1	Down	20	5273
ENSBGRG00000026058	-	meiosis specific with OB-fold [Source:HGNC Symbol;Acc:HGNC:28569]	16.91	0	0	-Inf	0.0459179	1	Down	26	1701
ENSBGRG00000014757	ZFP90	ZFP90 zinc finger protein [Source:HGNC Symbol;Acc:HGNC:23329]	270.213	125.132	0.463085	-1.11065	0.0459872	1	Down	20	1934
ENSBGRG00000009629	BMP1	bone morphogenetic protein 1 [Source:HGNC Symbol;Acc:HGNC:1067]	67.0316	219.398	3.27305	1.71064	0.0460622	1	Up	7	5469
ENSBGRG00000012759	MGAT1	alpha-1,3-mannosyl-glycoprotein 2-beta-N- acetylglucosaminyltransferase [Source:HGNC Symbol;Acc:HGNC:7044]	84.8773	197.477	2.32662	1.21823	0.0462403	1	Up	8	1341
ENSBGRG00000000863	COL6A2	collagen type VI alpha 2 chain [Source:HGNC Symbol;Acc:HGNC:2212]	1110.48	3045.64	2.74263	1.45556	0.046295	1	Up	1	3407
ENSBGRG00000016878	MOGAT1	monoacylglycerol O-acyltransferase 1 [Source:HGNC Symbol;Acc:HGNC:18210]	20.754	88.4642	4.26252	2.09171	0.0463035	1	Up	2	2036
ENSBGRG00000022784	GNL1	G protein nucleolar 1 (putative) [Source:HGNC Symbol;Acc:HGNC:4413]	33.8679	102.189	3.01727	1.59324	0.046364	1	Up	24	1985
ENSBGRG00000015132	RASSF5	Ras association domain family member 5 [Source:HGNC Symbol;Acc:HGNC:17609]	30.1405	1.90108	0.0630738	-3.98682	0.0467224	1	Down	14	2201
ENSBGRG00000016981	KIFC1	kinesin family member C1 [Source:HGNC Symbol;Acc:HGNC:6389]	0	19.5597	Inf	Inf	0.0468229	1	Up	24	2151
ENSBGRG00000010987	ANGPTL7	angiopoietin like 7 [Source:HGNC Symbol;Acc:HGNC:24078]	77.1695	0	0	-Inf	0.0469657	1	Down	14	1035
ENSBGRG00000007157	CCDC69	coiled-coil domain containing 69 [Source:HGNC Symbol;Acc:HGNC:24487]	49.0589	150.694	3.07169	1.61903	0.0471007	1	Up	8	1560
ENSBGRG00000019267	ADGB	androglobin [Source:HGNC Symbol;Acc:HGNC:21212]	28.892	1.47547	0.0510685	-4.29142	0.0472382	1	Down	10	4851
ENSBGRG00000025121	SERPINF1	serpin family F member 1 [Source:HGNC Symbol;Acc:HGNC:8824]	176.751	757.089	4.28337	2.09874	0.0474824	1	Up	19	1502
ENSBGRG00000005016	S100A12	S100 calcium binding protein A12 [Source:HGNC Symbol;Acc:HGNC:10489]	328.21	98.0317	0.298686	-1.7433	0.0474879	1	Down	3	556
ENSBGRG00000006426	-	-	3.57376	34.2014	9.57015	3.25854	0.0474908	1	Up	12	774
ENSBGRG00000018449	LENG9	leukocyte receptor cluster member 9 [Source:HGNC Symbol;Acc:HGNC:16306]	0	15.8366	Inf	Inf	0.0476278	1	Up	20	1443
ENSBGRG00000013438	CNP	2',3'-cyclic nucleotide 3' phosphodiesterase [Source:HGNC Symbol;Acc:HGNC:2158]	36.1225	124.494	3.44643	1.7851	0.047891	1	Up	19	1263
ENSBGRG00000023889	MMP2	matrix metallopeptidase 2 [Source:HGNC Symbol;Acc:HGNC:7166]	467.974	976.544	2.08675	1.06126	0.0479518	1	Up	20	1983
ENSBGRG00000026911	ZC3H18	zinc finger CCCH-type containing 18 [Source:HGNC Symbol;Acc:HGNC:25091]	93.8906	207.414	2.2091	1.14346	0.0479862	1	Up	20	3620
ENSBGRG00000015045	UBE2W	ubiquitin conjugating enzyme E2 W [Source:HGNC Symbol;Acc:HGNC:25616]	42.2873	5.39707	0.127628	-2.96998	0.0482416	1	Down	18	730
ENSBGRG00000011132	-	-	54.8574	8.85282	0.161379	-2.63148	0.0483748	1	Down	13	944
ENSBGRG00000018062	DNAH5	dynein axonemal heavy chain 5 [Source:HGNC Symbol;Acc:HGNC:2950]	28.1491	1.18038	0.041933	-4.57577	0.0483953	1	Down	23	14448
ENSBGRG00000006075	SNTA1	syntrophin alpha 1 [Source:HGNC Symbol;Acc:HGNC:11167]	351.288	784.265	2.23254	1.15869	0.0484764	1	Up	12	1518
ENSBGRG00000026749	SPATA2L	spermatogenesis associated 2 like [Source:HGNC Symbol;Acc:HGNC:28393]	0	16.3179	Inf	Inf	0.0485406	1	Up	20	1359
ENSBGRG00000005206	TMED1	transmembrane p24 trafficking protein 1 [Source:HGNC Symbol;Acc:HGNC:17291]	15.9499	76.0064	4.76533	2.25258	0.0486175	1	Up	8	1227
ENSBGRG00000002405	-	-	269.329	128.446	0.47691	-1.06821	0.0489312	1	Down	8	4346
ENSBGRG00000012924	STX3	syntaxin 3 [Source:HGNC Symbol;Acc:HGNC:11438]	28.3176	88.4415	3.12319	1.64302	0.048989	1	Up	13	3064
ENSBGRG00000002249	DZIP1L	DAZ interacting zinc finger protein 1 like [Source:HGNC Symbol;Acc:HGNC:26551]	3.23065	33.5329	10.3796	3.37568	0.0490981	1	Up	1	2802
ENSBGRG00000008663	SLC22A23	solute carrier family 22 member 23 [Source:HGNC Symbol;Acc:HGNC:21106]	21.689	96.7824	4.46229	2.15778	0.0491674	1	Up	24	2665
ENSBGRG00000000257	SLX9	family with sequence similarity 207 member A [Source:HGNC Symbol;Acc:HGNC:15811]	0.974661	50.1012	51.4037	5.6838	0.0494374	1	Up	1	660
ENSBGRG00000000298	CD4	CD4 molecule [Source:HGNC Symbol;Acc:HGNC:1678]	29.369	1.77056	0.0602867	-4.05202	0.0498637	1	Down	5	1469
ENSBGRG00000006682	MYCBPAP	MYCBP associated protein [Source:HGNC Symbol;Acc:HGNC:19677]	0	15.6231	Inf	Inf	0.0499193	1	Up	19	3388
ENSBGRG00000016193	CIT	citron rho-interacting serine/threonine kinase [Source:HGNC Symbol;Acc:HGNC:1985]	20.5654	76.4906	3.71939	1.89506	0.0499717	1	Up	16	7420

## Sheet: LP vs HP
List of differentially expressed mRNAs(LP vs HP)													List of differentially expressed lncRNAs(LP vs HP)												List of differentially expressed circRNAs(LP vs HP)									List of differentially expressed miRNAs(LP vs HP)
id	Gene_id	Description	baseMean_LP	baseMean_HP	foldChange(HP/LP)	log2FoldChange	pval	padj	Regulation	Chromosome	Length		LncRNA_id	Gene_id	baseMean_LP	baseMean_HP	foldChange(HP/LP)	log2FoldChange	p-val	padj	Regulation	Chromosome	Length		Gene ID	baseMean_LP	baseMean_HP	foldChange(HP/LP)	log2FoldChange	p-val	p-adj	Regulation		id	baseMean	baseMeanA	baseMeanB	foldChange	log2FoldChange	pval	padj	Regulation
ENSBGRG00000008707	HR	HR lysine demethylase and nuclear receptor corepressor [Source:HGNC Symbol;Acc:HGNC:5172]	13.3216	200.669	15.0635	3.91298	3.85892e-05	0.569654	Up	7	6154		MSTRG.264017.20	MSTRG.264017	0	21050.5	Inf	Inf	0.000217051	0.486554	Up	VBZB01000090.1	733		bgrcirc_004326	184.371	9.6563	0.0523743	-4.255	4.4434e-05	0.155107	Down		bgr-mir-208-1	94.3155	54.3615	134.269	2.46994	1.30447	0.0127718	1	Up
ENSBGRG00000008695	PBLD	phenazine biosynthesis like protein domain containing [Source:HGNC Symbol;Acc:HGNC:23301]	62.3425	0	0	-Inf	0.000214012	0.923535	Down	27	2763		MSTRG.82372.2	MSTRG.82372	1244.4	0	0	-Inf	0.000261666	0.530493	Down	17	5903		bgrcirc_009733	151.599	10.5648	0.0696891	-3.84292	4.82898e-05	0.155107	Down		bgr-undef-1163	164.463	101.62	227.305	2.23681	1.16144	0.0495996	1	Up
ENSBGRG00000003576	KLB	klotho beta [Source:HGNC Symbol;Acc:HGNC:15527]	73.6533	0	0	-Inf	0.0002442	0.923535	Down	6	2907		MSTRG.3938.4	MSTRG.3938	754.571	0	0	-Inf	0.000634758	0.709513	Down	1	4076		bgrcirc_006601	684.674	166.375	0.242999	-2.04098	8.16781e-05	0.1749	Down		bgr-undef-29	256.67	38.8434	474.497	12.2156	3.61066	0.0315082	1	Up
ENSBGRG00000006039	XYLT2	xylosyltransferase 2 [Source:HGNC Symbol;Acc:HGNC:15517]	15.052	175.036	11.6288	3.53962	0.000282361	0.923535	Up	19	3359		MSTRG.181509.1	MSTRG.181509	0	625.868	Inf	Inf	0.00088399	0.820122	Up	3	213		bgrcirc_008677	50.8756	0	0	-Inf	0.000388783	0.491913	Down		bgr-undef-734	1.85356	0	3.70712	Inf	Inf	0.0300384	1	Up
ENSBGRG00000015631	FAM124B	family with sequence similarity 124 member B [Source:HGNC Symbol;Acc:HGNC:26224]	0	64.6246	Inf	Inf	0.000312808	0.923535	Up	2	2392		MSTRG.222503.1	MSTRG.222503	651.252	0	0	-Inf	0.00089312	0.820259	Down	6	1725		bgrcirc_008674	0	53.4551	Inf	Inf	0.000397634	0.491913	Up		bgr-undef-863	343.147	217.355	468.939	2.15747	1.10934	0.0357165	1	Up
ENSBGRG00000019818	KLHL29	kelch like family member 29 [Source:HGNC Symbol;Acc:HGNC:29404]	16.208	170.976	10.5489	3.39902	0.000496848	1	Up	9	3269		MSTRG.252554.1	MSTRG.252554	612.942	0	0	-Inf	0.000972059	0.86471	Down	9	1793		bgrcirc_014299	47.7219	0	0	-Inf	0.000472274	0.491913	Down		bgr-undef-919	2.43393	0	4.86786	Inf	Inf	0.0142453	1	Up
ENSBGRG00000005083	COL4A2	collagen type IV alpha 2 chain [Source:HGNC Symbol;Acc:HGNC:2203]	632.129	1830.04	2.89505	1.53359	0.00054111	1	Up	15	6095		MSTRG.247985.5	MSTRG.247985	617.718	0	0	-Inf	0.00100865	0.878007	Down	8	2671		bgrcirc_015739	58.1286	0.782579	0.0134629	-6.21487	0.00056325	0.491913	Down		bgr-undef-579	28.9181	48.201	9.63533	0.199899	-2.32266	0.000627164	1	Down
ENSBGRG00000020183	COL15A1	collagen type XV alpha 1 chain [Source:HGNC Symbol;Acc:HGNC:2192]	1296.11	3437.38	2.65207	1.40712	0.000602972	1	Up	7	4241		MSTRG.37750.3	MSTRG.37750	565.592	0	0	-Inf	0.00118711	0.952258	Down	12	878		bgrcirc_014475	46.2288	0	0	-Inf	0.000612595	0.491913	Down
ENSBGRG00000012434	SLC7A10	solute carrier family 7 member 10 [Source:HGNC Symbol;Acc:HGNC:11058]	0	52.8129	Inf	Inf	0.000760305	1	Up	20	1709		ENSBGRT00000043372	ENSBGRG00000023512	487.194	0	0	-Inf	0.00148167	1	Down	2	4878		bgrcirc_014243	43.7026	0	0	-Inf	0.000925868	0.660864	Down
ENSBGRG00000002139	-	-	2821.53	1053.8	0.373485	-1.42088	0.000895624	1	Down	5	2142		ENSBGRT00000001657	ENSBGRG00000000908	500.02	0	0	-Inf	0.00153288	1	Down	2	1033		bgrcirc_010334	426.647	103.832	0.243366	-2.0388	0.00126336	0.741921	Down
ENSBGRG00000003232	LRIF1	ligand dependent nuclear receptor interacting factor 1 [Source:HGNC Symbol;Acc:HGNC:30299]	752.595	244.88	0.32538	-1.6198	0.0010958	1	Down	3	2354		MSTRG.264083.2	MSTRG.264083	859.671	0	0	-Inf	0.00176584	1	Down	VBZB01000110.1	2126		bgrcirc_017896	42.0513	0	0	-Inf	0.00127041	0.741921	Down
ENSBGRG00000010057	PEX16	peroxisomal biogenesis factor 16 [Source:HGNC Symbol;Acc:HGNC:8857]	0	96.5844	Inf	Inf	0.00114602	1	Up	13	1170		MSTRG.91083.17	MSTRG.91083	398.74	0	0	-Inf	0.00245671	1	Down	18	2556		bgrcirc_003087	41.4481	0	0	-Inf	0.00143848	0.770066	Down
ENSBGRG00000019094	SPATA25	spermatogenesis associated 25 [Source:HGNC Symbol;Acc:HGNC:16158]	0	46.1171	Inf	Inf	0.00156489	1	Up	12	657		MSTRG.113994.1	MSTRG.113994	379.222	0	0	-Inf	0.00270557	1	Down	2	566		bgrcirc_010108	51.5383	0.782579	0.0151844	-6.04127	0.00160322	0.792237	Down
ENSBGRG00000008888	CDH17	cadherin 17 [Source:HGNC Symbol;Acc:HGNC:1756]	47.947	0	0	-Inf	0.00161437	1	Down	18	3232		MSTRG.97925.6	MSTRG.97925	1.84616	962.402	521.3	9.02597	0.0032533	1	Up	19	2714		bgrcirc_009099	105.677	11.3474	0.107378	-3.21923	0.00196944	0.90369	Down
ENSBGRG00000022985	SCN4B	sodium voltage-gated channel beta subunit 4 [Source:HGNC Symbol;Acc:HGNC:10592]	290.896	872.942	3.00087	1.58538	0.00180832	1	Up	13	1505		MSTRG.138726.3	MSTRG.138726	332.679	0	0	-Inf	0.00336465	1	Down	22	2366		bgrcirc_002943	0	39.4306	Inf	Inf	0.00262108	1	Up
ENSBGRG00000006986	CD93	CD93 molecule [Source:HGNC Symbol;Acc:HGNC:15855]	45.6616	241.499	5.28889	2.40296	0.00193769	1	Up	12	1944		MSTRG.68374.2	MSTRG.68374	288.473	0	0	-Inf	0.00457598	1	Down	15	3342		bgrcirc_004198	36.4253	0	0	-Inf	0.0030603	1	Down
ENSBGRG00000004390	IQCB1	IQ motif containing B1 [Source:HGNC Symbol;Acc:HGNC:28949]	246.367	47.2508	0.19179	-2.3824	0.0022143	1	Down	1	1905		MSTRG.217973.1	MSTRG.217973	285.603	0	0	-Inf	0.00467845	1	Down	6	2263		bgrcirc_014068	35.1501	0	0	-Inf	0.00323026	1	Down
ENSBGRG00000014043	-	-	14.9875	143.135	9.55031	3.25555	0.0023003	1	Up	17	838		MSTRG.264083.4	MSTRG.264083	10.9594	7995.64	729.572	9.51091	0.00481083	1	Up	VBZB01000110.1	888		bgrcirc_010742	34.7051	0	0	-Inf	0.00347215	1	Down
ENSBGRG00000014262	PPARGC1A	PPARG coactivator 1 alpha [Source:HGNC Symbol;Acc:HGNC:9237]	1376.89	487.02	0.353709	-1.49936	0.0025559	1	Down	6	4009		MSTRG.249853.1	MSTRG.249853	0	278.299	Inf	Inf	0.00490861	1	Up	8	855		bgrcirc_008630	34.7051	0	0	-Inf	0.00347215	1	Down
ENSBGRG00000005880	VSTM2L	V-set and transmembrane domain containing 2 like [Source:HGNC Symbol;Acc:HGNC:16096]	0	41.9302	Inf	Inf	0.00260875	1	Up	12	1094		MSTRG.257606.3	MSTRG.257606	0.333023	376.984	1132.01	10.1447	0.00494958	1	Up	9	1320		bgrcirc_004226	36.5091	0	0	-Inf	0.00367283	1	Down
ENSBGRG00000000313	CCN1	cellular communication network factor 1 [Source:HGNC Symbol;Acc:HGNC:2654]	457.975	1300.18	2.83897	1.50537	0.00277445	1	Up	3	1455		MSTRG.23215.1	MSTRG.23215	265.656	0	0	-Inf	0.0055515	1	Down	10	375		bgrcirc_012818	35.649	0	0	-Inf	0.00384309	1	Down
ENSBGRG00000019923	GCNT1	glucosaminyl (N-acetyl) transferase 1 [Source:HGNC Symbol;Acc:HGNC:4203]	282.607	59.9836	0.212251	-2.23616	0.00348247	1	Down	7	1287		MSTRG.225961.2	MSTRG.225961	0	252.448	Inf	Inf	0.00597712	1	Up	6	1274		bgrcirc_017953	304.976	874.229	2.86655	1.51931	0.00395417	1	Up
ENSBGRG00000013297	CRELD1	cysteine rich with EGF like domains 1 [Source:HGNC Symbol;Acc:HGNC:14630]	15.7719	138.758	8.79777	3.13714	0.00371278	1	Up	22	3026		MSTRG.264017.19	MSTRG.264017	0	9563.51	Inf	Inf	0.00638303	1	Up	VBZB01000090.1	483		bgrcirc_016141	59.2009	2.73902	0.0462666	-4.43389	0.00407985	1	Down
ENSBGRG00000022933	BRAT1	BRCA1 associated ATM activator 1 [Source:HGNC Symbol;Acc:HGNC:21701]	0	56.7651	Inf	Inf	0.003842	1	Up	26	3456		MSTRG.239182.29	MSTRG.239182	253.757	0	0	-Inf	0.00660223	1	Down	8	1945		bgrcirc_015460	48.9431	1.56516	0.0319791	-4.96673	0.00428355	1	Down
ENSBGRG00000019172	NMRK2	nicotinamide riboside kinase 2 [Source:HGNC Symbol;Acc:HGNC:17871]	1575.43	4664.62	2.96086	1.56602	0.00416114	1	Up	8	588		MSTRG.173275.2	MSTRG.173275	238.462	0	0	-Inf	0.0072941	1	Down	29	1078		bgrcirc_008109	32.9254	0	0	-Inf	0.00463869	1	Down
ENSBGRG00000004437	COL4A1	collagen type IV alpha 1 chain [Source:HGNC Symbol;Acc:HGNC:2202]	925.212	2156.07	2.33035	1.22055	0.00426418	1	Up	15	5034		MSTRG.94533.5	MSTRG.94533	0	227.576	Inf	Inf	0.00736897	1	Up	18	2248		bgrcirc_004292	46.3722	1.17387	0.025314	-5.30392	0.00469773	1	Down
ENSBGRG00000003011	PODN	podocan [Source:HGNC Symbol;Acc:HGNC:23174]	202.821	589.529	2.90665	1.53936	0.00442877	1	Up	3	1918		MSTRG.188630.14	MSTRG.188630	0	232.887	Inf	Inf	0.00772223	1	Up	4	878		bgrcirc_012768	38.2646	0.391289	0.0102259	-6.61163	0.00473196	1	Down
ENSBGRG00000024359	HSD3B7	hydroxy-delta-5-steroid dehydrogenase, 3 beta- and steroid delta-isomerase 7 [Source:HGNC Symbol;Acc:HGNC:18324]	2.19143	64.7943	29.5671	4.88592	0.00475974	1	Up	26	1107		MSTRG.119864.2	MSTRG.119864	465.731	0	0	-Inf	0.00774102	1	Down	20	1662		bgrcirc_007025	58.3706	3.13031	0.0536282	-4.22086	0.00475427	1	Down
ENSBGRG00000002918	PFDN5	prefoldin subunit 5 [Source:HGNC Symbol;Acc:HGNC:8869]	38.5072	0	0	-Inf	0.00544473	1	Down	5	2395		MSTRG.150888.7	MSTRG.150888	232.644	0	0	-Inf	0.00779354	1	Down	25	946		bgrcirc_016775	48.394	1.56516	0.032342	-4.95045	0.00599596	1	Down
ENSBGRG00000009629	BMP1	bone morphogenetic protein 1 [Source:HGNC Symbol;Acc:HGNC:1067]	65.1272	345.981	5.3124	2.40936	0.00556558	1	Up	7	5469		MSTRG.200254.2	MSTRG.200254	230.276	0	0	-Inf	0.00805363	1	Down	4	3570		bgrcirc_017104	0	34.3652	Inf	Inf	0.00603185	1	Up
ENSBGRG00000000718	-	interleukin 1 receptor accessory protein [Source:HGNC Symbol;Acc:HGNC:5995]	50.6614	0	0	-Inf	0.00614502	1	Down	1	1682		MSTRG.71407.2	MSTRG.71407	222.414	0	0	-Inf	0.00820477	1	Down	15	1812		bgrcirc_008371	31.1456	0	0	-Inf	0.00620524	1	Down
ENSBGRG00000026038	NAV1	neuron navigator 1 [Source:HGNC Symbol;Acc:HGNC:15989]	124.528	395.592	3.17672	1.66754	0.00628038	1	Up	14	7724		MSTRG.138749.8	MSTRG.138749	568.169	0	0	-Inf	0.00826406	1	Down	22	5143		bgrcirc_002791	32.1193	0	0	-Inf	0.00626937	1	Down
ENSBGRG00000020997	GLCE	glucuronic acid epimerase [Source:HGNC Symbol;Acc:HGNC:17855]	971.046	395.293	0.407079	-1.29662	0.00655501	1	Down	11	3083		MSTRG.243312.4	MSTRG.243312	219.313	0	0	-Inf	0.00841309	1	Down	8	1361		bgrcirc_013288	189.601	44.5224	0.234821	-2.09037	0.00684917	1	Down
ENSBGRG00000016458	-	-	0	37.0557	Inf	Inf	0.00700415	1	Up	24	381		MSTRG.55639.4	MSTRG.55639	0	217.027	Inf	Inf	0.00843371	1	Up	13	1264		bgrcirc_015858	28.1446	169.479	6.02172	2.59018	0.0069294	1	Up
ENSBGRG00000013193	MYL3	myosin light chain 3 [Source:HGNC Symbol;Acc:HGNC:7584]	442.015	1444.02	3.2669	1.70792	0.0070547	1	Up	22	3855		MSTRG.18399.2	MSTRG.18399	224.49	0	0	-Inf	0.00869172	1	Down	10	1061		bgrcirc_010544	30.2558	0	0	-Inf	0.00718042	1	Down
ENSBGRG00000025096	ANGPTL4	angiopoietin like 4 [Source:HGNC Symbol;Acc:HGNC:16039]	72.2507	288.986	3.99976	1.99991	0.00714751	1	Up	8	1448		MSTRG.117721.1	MSTRG.117721	282.567	0.308779	0.00109277	-9.8378	0.0092836	1	Down	20	1190		bgrcirc_000314	29.8108	0	0	-Inf	0.00772498	1	Down
ENSBGRG00000010694	AMD1	adenosylmethionine decarboxylase 1 [Source:HGNC Symbol;Acc:HGNC:457]	905.606	373.59	0.412531	-1.27743	0.00736855	1	Down	10	1463		MSTRG.54758.2	MSTRG.54758	0	235.729	Inf	Inf	0.00957801	1	Up	13	2038		bgrcirc_017814	90.5588	12.9125	0.142587	-2.81008	0.00776628	1	Down
ENSBGRG00000012998	ABCC10	ATP binding cassette subfamily C member 10 [Source:HGNC Symbol;Acc:HGNC:52]	14.2211	124.311	8.74133	3.12785	0.00737582	1	Up	24	4680		MSTRG.177603.2	MSTRG.177603	0	285.363	Inf	Inf	0.0100799	1	Up	3	1439		bgrcirc_001701	80.7757	7.48834	0.0927053	-3.4312	0.00780121	1	Down
ENSBGRG00000022357	-	-	59.5883	239.926	4.02639	2.00949	0.00756189	1	Up	20	2416		ENSBGRT00000043375	ENSBGRG00000023512	0	197.958	Inf	Inf	0.0101232	1	Up	2	4878		bgrcirc_007705	29.3659	0	0	-Inf	0.00831151	1	Down
ENSBGRG00000026088	KCNN1	potassium calcium-activated channel subfamily N member 1 [Source:HGNC Symbol;Acc:HGNC:6290]	35.9558	0	0	-Inf	0.00791614	1	Down	8	1713		MSTRG.1486.2	MSTRG.1486	204.426	0	0	-Inf	0.0101317	1	Down	1	2724		bgrcirc_015550	29.3659	0	0	-Inf	0.00831151	1	Down
ENSBGRG00000004102	STK3	serine/threonine kinase 3 [Source:HGNC Symbol;Acc:HGNC:11406]	491.93	173.079	0.351837	-1.50702	0.00840427	1	Down	18	2251		MSTRG.10756.3	MSTRG.10756	0	197.096	Inf	Inf	0.0104259	1	Up	1	1396		bgrcirc_010944	141.933	428.214	3.017	1.59312	0.00866681	1	Up
ENSBGRG00000012776	ZFP62	ZFP62 zinc finger protein [Source:HGNC Symbol;Acc:HGNC:23241]	448.181	156.587	0.349383	-1.51712	0.00863871	1	Down	8	3039		MSTRG.183423.4	MSTRG.183423	0	198.612	Inf	Inf	0.0104763	1	Up	3	2150		bgrcirc_002975	2.94144	48.2217	16.3939	4.03509	0.00896683	1	Up
ENSBGRG00000025051	SCAMP5	secretory carrier membrane protein 5 [Source:HGNC Symbol;Acc:HGNC:30386]	0	35.3458	Inf	Inf	0.00865885	1	Up	17	2258		MSTRG.112803.7	MSTRG.112803	200.066	0	0	-Inf	0.0107104	1	Down	2	4166		bgrcirc_008172	53.2045	3.5216	0.06619	-3.91724	0.00925856	1	Down
ENSBGRG00000012579	FOXO1	forkhead box O1 [Source:HGNC Symbol;Acc:HGNC:3819]	2375.43	1058.92	0.44578	-1.1656	0.00874807	1	Down	15	2999		MSTRG.273621.1	MSTRG.273621	198.049	0	0	-Inf	0.0108109	1	Down	X	878		bgrcirc_015757	40.3311	1.05081	0.0260546	-5.26232	0.00932515	1	Down
ENSBGRG00000000487	-	-	733.149	275.537	0.375827	-1.41186	0.0101316	1	Down	2	1259		MSTRG.22264.3	MSTRG.22264	200.394	0	0	-Inf	0.0108421	1	Down	10	844		bgrcirc_002771	0.588287	36.4165	61.9025	5.95193	0.00963376	1	Up
ENSBGRG00000003542	PRIM1	DNA primase subunit 1 [Source:HGNC Symbol;Acc:HGNC:9369]	230.075	56.904	0.247328	-2.0155	0.0101808	1	Down	5	1531		MSTRG.136075.1	MSTRG.136075	0	192.984	Inf	Inf	0.0112756	1	Up	22	783		bgrcirc_015451	0	34.5015	Inf	Inf	0.00972816	1	Up
ENSBGRG00000020060	TMEM175	transmembrane protein 175 [Source:HGNC Symbol;Acc:HGNC:28709]	14.1638	109.442	7.72685	2.94988	0.0103597	1	Up	6	2896		MSTRG.144779.4	MSTRG.144779	192.704	0	0	-Inf	0.0114877	1	Down	24	1967		bgrcirc_008116	30.2949	0	0	-Inf	0.00976435	1	Down
ENSBGRG00000007410	NAMPT	nicotinamide phosphoribosyltransferase [Source:HGNC Symbol;Acc:HGNC:30092]	2101.4	738.885	0.351615	-1.50793	0.010469	1	Down	4	2758		MSTRG.169825.1	MSTRG.169825	194.296	0	0	-Inf	0.0117397	1	Down	28	859		bgrcirc_016615	33.7855	0.391289	0.0115816	-6.43202	0.00982123	1	Down
ENSBGRG00000020812	-	-	147.951	888.59	6.00598	2.5864	0.0105867	1	Up	24	1617		MSTRG.153989.5	MSTRG.153989	187.209	0	0	-Inf	0.0120264	1	Down	25	1384		bgrcirc_000283	29.1481	0	0	-Inf	0.0103891	1	Down
ENSBGRG00000012363	SDC4	syndecan 4 [Source:HGNC Symbol;Acc:HGNC:10661]	703.079	236.536	0.336429	-1.57163	0.0109668	1	Down	12	1051		MSTRG.141095.1	MSTRG.141095	0	188.886	Inf	Inf	0.0121774	1	Up	23	366		bgrcirc_010905	70.6111	6.34908	0.0899162	-3.47527	0.0104659	1	Down
ENSBGRG00000016906	CDCA2	cell division cycle associated 2 [Source:HGNC Symbol;Acc:HGNC:14623]	1.26409	49.1739	38.9005	5.28172	0.0111005	1	Up	7	3036		MSTRG.229634.1	MSTRG.229634	193.906	0	0	-Inf	0.0122107	1	Down	7	444		bgrcirc_001348	338.989	96.3034	0.28409	-1.81558	0.0106077	1	Down
ENSBGRG00000010901	DHRS7B	dehydrogenase/reductase 7B [Source:HGNC Symbol;Acc:HGNC:24547]	50.4945	209.196	4.14294	2.05066	0.0111641	1	Up	19	1828		MSTRG.257546.1	MSTRG.257546	0	184.961	Inf	Inf	0.0123388	1	Up	9	826		bgrcirc_011992	43.6039	1.95645	0.0448686	-4.47815	0.0107029	1	Down
ENSBGRG00000015533	GAMT	guanidinoacetate N-methyltransferase [Source:HGNC Symbol;Acc:HGNC:4136]	101.588	491.283	4.83605	2.27383	0.0113127	1	Up	8	1192		MSTRG.82301.11	MSTRG.82301	0	181.241	Inf	Inf	0.0125675	1	Up	17	1167		bgrcirc_013811	27.5861	0	0	-Inf	0.0111468	1	Down
ENSBGRG00000005144	MOCS3	molybdenum cofactor synthesis 3 [Source:HGNC Symbol;Acc:HGNC:15765]	7.77617	87.3994	11.2394	3.49049	0.0115619	1	Up	12	1386		MSTRG.171885.1	MSTRG.171885	190.109	0	0	-Inf	0.0126989	1	Down	29	663		bgrcirc_016866	27.5861	0	0	-Inf	0.0111468	1	Down
ENSBGRG00000011484	SFRP1	secreted frizzled related protein 1 [Source:HGNC Symbol;Acc:HGNC:10776]	11.1934	94.8898	8.4773	3.0836	0.0117412	1	Up	28	1927		MSTRG.173977.1	MSTRG.173977	0	178.968	Inf	Inf	0.0127314	1	Up	29	953		bgrcirc_001086	27.5861	0	0	-Inf	0.0111468	1	Down
ENSBGRG00000016319	-	-	28.3566	150.666	5.31326	2.4096	0.0117884	1	Up	6	2584		MSTRG.196983.1	MSTRG.196983	179.758	0	0	-Inf	0.0136292	1	Down	4	380		bgrcirc_013235	32.4804	0.268231	0.00825822	-6.91995	0.0112017	1	Down
ENSBGRG00000020150	ULK4	unc-51 like kinase 4 [Source:HGNC Symbol;Acc:HGNC:15784]	145.688	22.5762	0.154963	-2.69001	0.0120695	1	Down	22	5549		MSTRG.58911.1	MSTRG.58911	180.368	0	0	-Inf	0.0137904	1	Down	14	581		bgrcirc_007964	0	31.047	Inf	Inf	0.011255	1	Up
ENSBGRG00000010836	-	-	0	32.0206	Inf	Inf	0.0125277	1	Up	8	654		MSTRG.187213.5	MSTRG.187213	0	177.77	Inf	Inf	0.0140239	1	Up	3	496		bgrcirc_010948	62.8647	7.04321	0.112038	-3.15794	0.0115058	1	Down
ENSBGRG00000011476	KCNN2	potassium calcium-activated channel subfamily N member 2 [Source:HGNC Symbol;Acc:HGNC:6291]	32.429	0	0	-Inf	0.0130502	1	Down	11	3063		MSTRG.217973.3	MSTRG.217973	176.918	0	0	-Inf	0.0141262	1	Down	6	1009		bgrcirc_017954	0	29.5562	Inf	Inf	0.0117741	1	Up
ENSBGRG00000017531	CRAT	carnitine O-acetyltransferase [Source:HGNC Symbol;Acc:HGNC:2342]	1520.78	3046.46	2.00322	1.00232	0.013413	1	Up	9	2022		MSTRG.244366.1	MSTRG.244366	168.085	0	0	-Inf	0.0155389	1	Down	8	963		bgrcirc_015991	44.1326	1.95645	0.0443311	-4.49554	0.0118464	1	Down
ENSBGRG00000016750	TIPARP	TCDD inducible poly(ADP-ribose) polymerase [Source:HGNC Symbol;Acc:HGNC:23696]	853.092	283.162	0.331924	-1.59107	0.0134476	1	Down	1	2181		MSTRG.146425.1	MSTRG.146425	167.97	0	0	-Inf	0.0156261	1	Down	24	1145		bgrcirc_005455	27.1412	0	0	-Inf	0.0119978	1	Down
ENSBGRG00000025189	HIC2	HIC ZBTB transcriptional repressor 2 [Source:HGNC Symbol;Acc:HGNC:18595]	0	30.3559	Inf	Inf	0.013587	1	Up	16	1848		MSTRG.260207.2	MSTRG.260207	168.184	0	0	-Inf	0.016056	1	Down	9	705		bgrcirc_009255	28.2582	0	0	-Inf	0.0120429	1	Down
ENSBGRG00000003633	TF	transferrin [Source:HGNC Symbol;Acc:HGNC:11740]	31.8456	0	0	-Inf	0.0137111	1	Down	1	3069		MSTRG.167967.3	MSTRG.167967	162.396	0	0	-Inf	0.0162382	1	Down	28	1167		bgrcirc_003694	26.6963	0	0	-Inf	0.0129148	1	Down
ENSBGRG00000020523	SNAPC2	small nuclear RNA activating complex polypeptide 2 [Source:HGNC Symbol;Acc:HGNC:11135]	0	31.8066	Inf	Inf	0.0139447	1	Up	8	1682		MSTRG.183516.2	MSTRG.183516	164.109	0	0	-Inf	0.0165217	1	Down	3	1538		bgrcirc_000464	80.4984	9.8456	0.122308	-3.03141	0.013073	1	Down
ENSBGRG00000019318	MAB21L1	mab-21 like 1 [Source:HGNC Symbol;Acc:HGNC:6757]	1.39667	45.7962	32.7895	5.03516	0.0141113	1	Up	15	1554		MSTRG.85603.1	MSTRG.85603	168.486	0	0	-Inf	0.0165927	1	Down	17	712		bgrcirc_005298	0	54.4406	Inf	Inf	0.0132546	1	Up
ENSBGRG00000006615	SEC16B	SEC16 homolog B, endoplasmic reticulum export factor [Source:HGNC Symbol;Acc:HGNC:30301]	20.1869	126.896	6.28609	2.65216	0.0141138	1	Up	14	4001		MSTRG.172621.1	MSTRG.172621	165.59	0	0	-Inf	0.0167252	1	Down	29	1078		bgrcirc_004837	31.7041	0.391289	0.0123419	-6.34029	0.0135149	1	Down
ENSBGRG00000008693	-	-	0	31.7448	Inf	Inf	0.0142116	1	Up	11	1167		MSTRG.276691.6	MSTRG.276691	0	157.827	Inf	Inf	0.0168549	1	Up	Y	1225		bgrcirc_004486	34.6902	0.782579	0.022559	-5.47015	0.0135358	1	Down
ENSBGRG00000002593	ATP13A2	ATPase cation transporting 13A2 [Source:HGNC Symbol;Acc:HGNC:30213]	15.6301	193.589	12.3856	3.6306	0.0142184	1	Up	2	3528		MSTRG.6323.1	MSTRG.6323	0	164.694	Inf	Inf	0.0169989	1	Up	1	634		bgrcirc_008797	85.3089	15.6516	0.183469	-2.44639	0.0142859	1	Down
ENSBGRG00000020275	CBX8	chromobox 8 [Source:HGNC Symbol;Acc:HGNC:15962]	0	30.7149	Inf	Inf	0.0142303	1	Up	19	3353		MSTRG.213716.2	MSTRG.213716	160.42	0	0	-Inf	0.01706	1	Down	5	1209		bgrcirc_003993	9.4126	101.14	10.7452	3.42562	0.0149121	1	Up
ENSBGRG00000003965	-	-	0	30.5757	Inf	Inf	0.0142859	1	Up	5	2022		MSTRG.22965.4	MSTRG.22965	1.08631	300.223	276.37	8.11046	0.0170972	1	Up	10	3171		bgrcirc_014157	25.8064	0	0	-Inf	0.0149678	1	Down
ENSBGRG00000013964	LRRC75A	leucine rich repeat containing 75A [Source:HGNC Symbol;Acc:HGNC:32403]	0	30.2262	Inf	Inf	0.0143664	1	Up	19	1038		MSTRG.30510.27	MSTRG.30510	0	159.332	Inf	Inf	0.0173614	1	Up	11	1456		bgrcirc_004136	37.9277	0.782579	0.0206334	-5.59887	0.0150442	1	Down
ENSBGRG00000009254	PIK3C2A	phosphatidylinositol-4-phosphate 3-kinase catalytic subunit type 2 alpha [Source:HGNC Symbol;Acc:HGNC:8971]	1534.55	751.024	0.489411	-1.03088	0.0145148	1	Down	13	5125		MSTRG.50358.1	MSTRG.50358	160.991	0	0	-Inf	0.0174905	1	Down	13	991		bgrcirc_003259	0	28.5005	Inf	Inf	0.0153481	1	Up
ENSBGRG00000009933	ASB12	ankyrin repeat and SOCS box containing 12 [Source:HGNC Symbol;Acc:HGNC:19763]	548.422	1175.22	2.14292	1.09958	0.0145591	1	Up	X	1209		MSTRG.145105.1	MSTRG.145105	0	189.817	Inf	Inf	0.0175034	1	Up	24	449		bgrcirc_002922	40.454	1.05081	0.0259754	-5.26671	0.0154928	1	Down
ENSBGRG00000007584	PRAG1	PEAK1 related, kinase-activating pseudokinase 1 [Source:HGNC Symbol;Acc:HGNC:25438]	76.9158	261.058	3.39407	1.76302	0.0145862	1	Up	28	6370		MSTRG.174641.18	MSTRG.174641	205.373	0.308779	0.0015035	-9.37746	0.0178037	1	Down	3	1507		bgrcirc_000791	0	28.1232	Inf	Inf	0.0155834	1	Up
ENSBGRG00000016687	PIGBOS1	PIGB opposite strand 1 [Source:HGNC Symbol;Acc:HGNC:50696]	44.3729	1.00585	0.0226682	-5.46319	0.0150273	1	Down	11	165		MSTRG.67609.1	MSTRG.67609	0	160.411	Inf	Inf	0.0179165	1	Up	15	1034		bgrcirc_008970	82.738	14.4777	0.174983	-2.51472	0.0160565	1	Down
ENSBGRG00000007703	SRGAP3	SLIT-ROBO Rho GTPase activating protein 3 [Source:HGNC Symbol;Acc:HGNC:19744]	3.07729	70.5759	22.9344	4.51944	0.0152648	1	Up	22	3439		MSTRG.97613.1	MSTRG.97613	0	156.696	Inf	Inf	0.0179839	1	Up	19	971		bgrcirc_007770	63.4083	6.47214	0.102071	-3.29236	0.016078	1	Down
ENSBGRG00000025687	FBXW4	F-box and WD repeat domain containing 4 [Source:HGNC Symbol;Acc:HGNC:10847]	80.3467	300.836	3.74422	1.90467	0.0156244	1	Up	25	1935		MSTRG.54788.2	MSTRG.54788	159.423	0	0	-Inf	0.0179962	1	Down	13	902		bgrcirc_014306	25.3614	0	0	-Inf	0.0161154	1	Down
ENSBGRG00000009743	FDXACB1	ferredoxin-fold anticodon binding domain containing 1 [Source:HGNC Symbol;Acc:HGNC:25110]	30.7972	0	0	-Inf	0.0159941	1	Down	13	1875		MSTRG.189461.1	MSTRG.189461	159.819	0	0	-Inf	0.0181507	1	Down	4	1070		bgrcirc_012694	116.206	26.45	0.227612	-2.13535	0.0168893	1	Down
ENSBGRG00000014092	SOD3	superoxide dismutase 3 [Source:HGNC Symbol;Acc:HGNC:11181]	1.26409	59.9244	47.405	5.56697	0.0160424	1	Up	6	2488		MSTRG.3134.2	MSTRG.3134	160.289	0	0	-Inf	0.0182292	1	Down	1	941		bgrcirc_001687	84.097	12.8116	0.152343	-2.7146	0.0171451	1	Down
ENSBGRG00000016397	CYP4V2	cytochrome P450 family 4 subfamily V member 2 [Source:HGNC Symbol;Acc:HGNC:23198]	193.115	47.883	0.247951	-2.01188	0.0161239	1	Down	28	1869		MSTRG.103475.1	MSTRG.103475	0	156.535	Inf	Inf	0.0182385	1	Up	19	839		bgrcirc_006716	27.7388	0	0	-Inf	0.017174	1	Down
ENSBGRG00000001029	GTF3C3	general transcription factor IIIC subunit 3 [Source:HGNC Symbol;Acc:HGNC:4666]	361.839	128.709	0.355706	-1.49124	0.0163431	1	Down	2	2658		MSTRG.27360.1	MSTRG.27360	0	154.158	Inf	Inf	0.0186799	1	Up	11	621		bgrcirc_002913	24.9165	0	0	-Inf	0.0173523	1	Down
ENSBGRG00000006266	S100A14	S100 calcium binding protein A14 [Source:HGNC Symbol;Acc:HGNC:18901]	11.0608	122.556	11.0802	3.46991	0.0164201	1	Up	3	315		MSTRG.54787.1	MSTRG.54787	157.139	0	0	-Inf	0.0189377	1	Down	13	589		bgrcirc_011298	24.9165	0	0	-Inf	0.0173523	1	Down
ENSBGRG00000018080	ZNF391	zinc finger protein 391 [Source:HGNC Symbol;Acc:HGNC:18779]	30.3883	0	0	-Inf	0.0165108	1	Down	24	1077		MSTRG.189101.3	MSTRG.189101	152.979	0	0	-Inf	0.0190516	1	Down	4	1537		bgrcirc_000446	67.7683	8.99965	0.1328	-2.91267	0.0173978	1	Down
ENSBGRG00000001080	ELAPOR1	KIAA1324 [Source:HGNC Symbol;Acc:HGNC:29618]	0	30.8526	Inf	Inf	0.0166046	1	Up	3	4410		MSTRG.81331.1	MSTRG.81331	0	153.453	Inf	Inf	0.0195475	1	Up	17	626		bgrcirc_013362	133.243	35.9515	0.269819	-1.88994	0.0179087	1	Down
ENSBGRG00000000821	-	-	0	30.8031	Inf	Inf	0.0166885	1	Up	1	1175		MSTRG.165482.1	MSTRG.165482	0	152.349	Inf	Inf	0.0195602	1	Up	27	453		bgrcirc_000066	45.1212	2.73902	0.0607038	-4.04207	0.0186814	1	Down
ENSBGRG00000008937	EXTL1	exostosin like glycosyltransferase 1 [Source:HGNC Symbol;Acc:HGNC:3515]	54.4791	211.381	3.88004	1.95607	0.0168684	1	Up	2	2896		MSTRG.183726.4	MSTRG.183726	153.703	0	0	-Inf	0.0198714	1	Down	3	805		bgrcirc_016305	24.4716	0	0	-Inf	0.0186855	1	Down
ENSBGRG00000019125	-	-	441.151	1453.55	3.2949	1.72024	0.0169928	1	Up	24	970		MSTRG.51785.2	MSTRG.51785	0	957.636	Inf	Inf	0.0199057	1	Up	13	6506		bgrcirc_003147	40.4149	1.71981	0.0425539	-4.55456	0.0191579	1	Down
ENSBGRG00000019774	-	-	2.87736	55.1438	19.1647	4.26038	0.0171628	1	Up	19	1751		MSTRG.34385.3	MSTRG.34385	213.483	0	0	-Inf	0.0199932	1	Down	11	1310		bgrcirc_004482	34.2602	1.17387	0.0342633	-4.86719	0.0195175	1	Down
ENSBGRG00000019591	NLGN2	neuroligin 2 [Source:HGNC Symbol;Acc:HGNC:14290]	0	30.4432	Inf	Inf	0.0174323	1	Up	19	2426		MSTRG.215438.1	MSTRG.215438	0	149.645	Inf	Inf	0.0201101	1	Up	6	734		bgrcirc_000064	95.8082	17.9522	0.187376	-2.41599	0.019541	1	Down
ENSBGRG00000016735	-	-	327.76	113.94	0.347632	-1.52437	0.0174885	1	Down	19	1185		MSTRG.149070.4	MSTRG.149070	150.062	0	0	-Inf	0.0202104	1	Down	24	648		bgrcirc_016393	24.3133	0	0	-Inf	0.0196599	1	Down
ENSBGRG00000024149	-	-	77.2971	271.815	3.51649	1.81414	0.0176162	1	Up	26	1672		MSTRG.252508.1	MSTRG.252508	0	150.358	Inf	Inf	0.0202343	1	Up	9	957		bgrcirc_001062	24.0266	0	0	-Inf	0.0201225	1	Down
ENSBGRG00000026269	MYOG	myogenin [Source:HGNC Symbol;Acc:HGNC:7612]	114.173	363.316	3.18217	1.67001	0.0176792	1	Up	14	700		MSTRG.9668.5	MSTRG.9668	1149.26	0	0	-Inf	0.020243	1	Down	1	3373		bgrcirc_006256	24.0266	0	0	-Inf	0.0201225	1	Down
ENSBGRG00000011219	LHCGR	luteinizing hormone/choriogonadotropin receptor [Source:HGNC Symbol;Acc:HGNC:6585]	30.3734	0	0	-Inf	0.0176943	1	Down	9	2909		MSTRG.208266.1	MSTRG.208266	151.314	0	0	-Inf	0.020383	1	Down	5	796		bgrcirc_010208	24.0266	0	0	-Inf	0.0201225	1	Down
ENSBGRG00000026159	NME3	NME/NM23 nucleoside diphosphate kinase 3 [Source:HGNC Symbol;Acc:HGNC:7851]	2.09501	48.4702	23.1361	4.53207	0.0177847	1	Up	26	510		MSTRG.124088.15	MSTRG.124088	0	889.933	Inf	Inf	0.0206421	1	Up	20	4376		bgrcirc_012876	24.0266	0	0	-Inf	0.0201225	1	Down
ENSBGRG00000011354	BMX	BMX non-receptor tyrosine kinase [Source:HGNC Symbol;Acc:HGNC:1079]	30.1774	0	0	-Inf	0.0178602	1	Down	Y	2204		MSTRG.54749.4	MSTRG.54749	254.89	1.08249	0.00424691	-7.87937	0.0209289	1	Down	13	1273		bgrcirc_013717	24.0266	0	0	-Inf	0.0201225	1	Down
ENSBGRG00000008127	RHOF	ras homolog family member F, filopodia associated [Source:HGNC Symbol;Acc:HGNC:15703]	120.635	398.54	3.30369	1.72408	0.0179138	1	Up	16	2358		MSTRG.264081.10	MSTRG.264081	1015.22	56394.3	55.5491	5.79569	0.0210746	1	Up	VBZB01000110.1	1853		bgrcirc_003596	0	35.3536	Inf	Inf	0.0201268	1	Up
ENSBGRG00000016580	CATSPERB	cation channel sperm associated auxiliary subunit beta [Source:HGNC Symbol;Acc:HGNC:20500]	29.4151	0	0	-Inf	0.0181101	1	Down	17	3085		MSTRG.124088.14	MSTRG.124088	0	828.052	Inf	Inf	0.0213924	1	Up	20	4449		bgrcirc_000679	363.52	150.485	0.413967	-1.27241	0.0201324	1	Down
ENSBGRG00000014983	ART3	ADP-ribosyltransferase 3 [Source:HGNC Symbol;Acc:HGNC:725]	3466.24	1559.7	0.449968	-1.15211	0.0182279	1	Down	6	1654		MSTRG.119905.1	MSTRG.119905	147.102	0	0	-Inf	0.0216796	1	Down	20	794		bgrcirc_008441	0	26.7065	Inf	Inf	0.0209445	1	Up
ENSBGRG00000007139	KLHL15	kelch like family member 15 [Source:HGNC Symbol;Acc:HGNC:29347]	526.257	214.924	0.408402	-1.29194	0.0183409	1	Down	X	3079		MSTRG.136354.3	MSTRG.136354	0	146.993	Inf	Inf	0.0216985	1	Up	22	623		bgrcirc_015142	32.4209	0.664261	0.0204887	-5.60903	0.0210008	1	Down
ENSBGRG00000016312	-	-	91.6022	13.3586	0.145832	-2.77762	0.0184404	1	Down	12	459		MSTRG.138994.1	MSTRG.138994	145.797	0	0	-Inf	0.0217824	1	Down	22	591		bgrcirc_015822	46.6738	3.91289	0.0838349	-3.5763	0.0211423	1	Down
ENSBGRG00000018549	-	-	9.34582	78.73	8.42408	3.07452	0.0187863	1	Up	29	1197		MSTRG.179757.1	MSTRG.179757	146.214	0	0	-Inf	0.0220269	1	Down	3	847		bgrcirc_008659	24.2836	0	0	-Inf	0.0213913	1	Down
ENSBGRG00000019549	OTULINL	OTU deubiquitinase with linear linkage specificity like [Source:HGNC Symbol;Acc:HGNC:25629]	305.704	99.6053	0.325823	-1.61784	0.0188412	1	Down	23	1126		MSTRG.52992.1	MSTRG.52992	143.29	0	0	-Inf	0.0220707	1	Down	13	851		bgrcirc_014893	61.9544	7.4345	0.12	-3.0589	0.0214702	1	Down
ENSBGRG00000014082	LASP1	LIM and SH3 protein 1 [Source:HGNC Symbol;Acc:HGNC:6513]	282.549	658.554	2.33076	1.2208	0.019038	1	Up	19	4641		MSTRG.174641.15	MSTRG.174641	249.971	0.92147	0.00368631	-8.08361	0.0221083	1	Down	3	2027		bgrcirc_006455	24.8421	0	0	-Inf	0.021652	1	Down
ENSBGRG00000017761	PXDN	peroxidasin [Source:HGNC Symbol;Acc:HGNC:14966]	376.633	815.856	2.16618	1.11515	0.0197641	1	Up	7	6780		MSTRG.257270.2	MSTRG.257270	143.215	0	0	-Inf	0.0221161	1	Down	9	2252		bgrcirc_000105	23.5817	0	0	-Inf	0.0216717	1	Down
ENSBGRG00000006355	OLFM1	olfactomedin 1 [Source:HGNC Symbol;Acc:HGNC:17187]	24.8306	192.779	7.76374	2.95675	0.0199799	1	Up	9	3638		MSTRG.185320.1	MSTRG.185320	144.599	0	0	-Inf	0.0222047	1	Down	3	705		bgrcirc_010147	23.5817	0	0	-Inf	0.0216717	1	Down
ENSBGRG00000020110	AXL	AXL receptor tyrosine kinase [Source:HGNC Symbol;Acc:HGNC:905]	209.598	500.371	2.38729	1.25537	0.0199836	1	Up	20	2752		MSTRG.175896.1	MSTRG.175896	142.108	0	0	-Inf	0.022386	1	Down	3	1133		bgrcirc_001773	31.1159	0.782579	0.0251505	-5.31327	0.0228422	1	Down
ENSBGRG00000014917	ACAD8	acyl-CoA dehydrogenase family member 8 [Source:HGNC Symbol;Acc:HGNC:87]	77.4376	238.396	3.07856	1.62225	0.0200798	1	Up	13	2891		MSTRG.225503.2	MSTRG.225503	194.525	0	0	-Inf	0.0226888	1	Down	6	1243		bgrcirc_010433	49.8424	4.30418	0.0863559	-3.53356	0.0230577	1	Down
ENSBGRG00000010087	NSG1	neuronal vesicle trafficking associated 1 [Source:HGNC Symbol;Acc:HGNC:18790]	0	28.3303	Inf	Inf	0.0201103	1	Up	6	1596		MSTRG.146433.2	MSTRG.146433	141.261	0	0	-Inf	0.0228219	1	Down	24	1637		bgrcirc_005664	35.8519	1.56516	0.0436561	-4.51767	0.0232157	1	Down
ENSBGRG00000026128	MAST3	microtubule associated serine/threonine kinase 3 [Source:HGNC Symbol;Acc:HGNC:19036]	19.474	115.644	5.93841	2.57008	0.0203093	1	Up	8	3921		MSTRG.139602.1	MSTRG.139602	142.322	0	0	-Inf	0.0229048	1	Down	22	896		bgrcirc_013125	97.0355	20.3442	0.209657	-2.2539	0.0232298	1	Down
ENSBGRG00000022881	SERPINH1	serpin family H member 1 [Source:HGNC Symbol;Acc:HGNC:1546]	331.009	1012.12	3.05767	1.61243	0.0204532	1	Up	13	2177		MSTRG.238151.2	MSTRG.238151	0	139.919	Inf	Inf	0.0229263	1	Up	7	741		bgrcirc_017817	23.1368	0	0	-Inf	0.0233417	1	Down
ENSBGRG00000012578	-	-	13.3464	90.912	6.81174	2.76802	0.0207602	1	Up	18	3390		MSTRG.175532.1	MSTRG.175532	141.599	0	0	-Inf	0.0231461	1	Down	3	620		bgrcirc_005769	23.1368	0	0	-Inf	0.0233417	1	Down
ENSBGRG00000004258	ANGPTL2	angiopoietin like 2 [Source:HGNC Symbol;Acc:HGNC:490]	148.859	441.693	2.96719	1.5691	0.0209213	1	Up	9	1953		MSTRG.186956.20	MSTRG.186956	138.459	0	0	-Inf	0.0231767	1	Down	3	729		bgrcirc_011767	54.6231	6.26063	0.114615	-3.12513	0.0237577	1	Down
ENSBGRG00000026877	-	-	159.278	430.118	2.70043	1.43319	0.0209672	1	Up	20	2628		MSTRG.196150.3	MSTRG.196150	220.113	0	0	-Inf	0.0238824	1	Down	4	2733		bgrcirc_012290	32.5196	0.782579	0.0240648	-5.37693	0.0238891	1	Down
ENSBGRG00000014778	PGK1	phosphoglycerate kinase 1 [Source:HGNC Symbol;Acc:HGNC:8896]	885.369	2287.94	2.58417	1.3697	0.0211024	1	Up	X	2409		MSTRG.97179.3	MSTRG.97179	140.876	0	0	-Inf	0.0239551	1	Down	19	1300		bgrcirc_012042	52.7893	6.65192	0.126009	-2.9884	0.0240727	1	Down
ENSBGRG00000006288	FBP2	fructose-bisphosphatase 2 [Source:HGNC Symbol;Acc:HGNC:3607]	2254.45	4534.32	2.01128	1.00811	0.0213749	1	Up	7	3167		MSTRG.84408.9	MSTRG.84408	139.434	0	0	-Inf	0.0241112	1	Down	17	1047		bgrcirc_009035	22.8352	0	0	-Inf	0.0248479	1	Down
ENSBGRG00000002127	OLFML2B	olfactomedin like 2B [Source:HGNC Symbol;Acc:HGNC:24558]	92.1954	396.45	4.30011	2.10437	0.0215598	1	Up	3	2764		MSTRG.150342.2	MSTRG.150342	138.703	0	0	-Inf	0.0241805	1	Down	25	2178		bgrcirc_011308	22.6918	0	0	-Inf	0.0251422	1	Down
ENSBGRG00000014410	P2RY14	purinergic receptor P2Y14 [Source:HGNC Symbol;Acc:HGNC:16442]	28.4576	0	0	-Inf	0.0218494	1	Down	1	1017		MSTRG.114573.112	MSTRG.114573	1.54353	441.872	286.273	8.16125	0.0244081	1	Up	2	669		bgrcirc_014936	22.6918	0	0	-Inf	0.0251422	1	Down
ENSBGRG00000017664	PRKD2	protein kinase D2 [Source:HGNC Symbol;Acc:HGNC:17293]	176.909	429.536	2.42801	1.27977	0.022051	1	Up	20	3357		MSTRG.20370.1	MSTRG.20370	138.429	0	0	-Inf	0.024447	1	Down	10	853		bgrcirc_007097	22.6918	0	0	-Inf	0.0251422	1	Down
ENSBGRG00000009343	MCHR1	melanin concentrating hormone receptor 1 [Source:HGNC Symbol;Acc:HGNC:4479]	112.156	311.797	2.78002	1.47509	0.0223442	1	Up	5	1062		MSTRG.160037.2	MSTRG.160037	138.007	0	0	-Inf	0.024595	1	Down	26	1695		bgrcirc_008867	23.9373	0	0	-Inf	0.0265363	1	Down
ENSBGRG00000014265	-	-	1.89614	46.5936	24.5728	4.61899	0.0225236	1	Up	22	1909		MSTRG.17182.3	MSTRG.17182	138.962	0	0	-Inf	0.0249026	1	Down	10	1364		bgrcirc_005011	34.7592	223.152	6.41996	2.68256	0.0267206	1	Up
ENSBGRG00000015838	TMC8	transmembrane channel like 8 [Source:HGNC Symbol;Acc:HGNC:20474]	2.19143	49.4924	22.5846	4.49726	0.0226133	1	Up	19	3372		MSTRG.170580.4	MSTRG.170580	15089.3	334.343	0.0221577	-5.49605	0.0249452	1	Down	29	1087		bgrcirc_003296	44.2015	3.13031	0.0708191	-3.81972	0.0269279	1	Down
ENSBGRG00000016298	KCNQ4	potassium voltage-gated channel subfamily Q member 4 [Source:HGNC Symbol;Acc:HGNC:6298]	160.238	432.994	2.70219	1.43413	0.022737	1	Up	3	3434		MSTRG.70097.19	MSTRG.70097	135.505	0	0	-Inf	0.0249758	1	Down	15	1494		bgrcirc_000654	22.2469	0	0	-Inf	0.0270834	1	Down
ENSBGRG00000009080	PYGO2	pygopus family PHD finger 2 [Source:HGNC Symbol;Acc:HGNC:30257]	22.3854	119.105	5.32065	2.4116	0.022805	1	Up	3	1218		MSTRG.113062.2	MSTRG.113062	0	134.413	Inf	Inf	0.0250154	1	Up	2	369		bgrcirc_017744	22.2469	0	0	-Inf	0.0270834	1	Down
ENSBGRG00000019059	BCKDHA	branched chain keto acid dehydrogenase E1 subunit alpha [Source:HGNC Symbol;Acc:HGNC:986]	149.872	412.095	2.74965	1.45925	0.0228835	1	Up	20	1763		MSTRG.264083.5	MSTRG.264083	0	718.776	Inf	Inf	0.0250364	1	Up	VBZB01000110.1	1068		bgrcirc_001093	22.2469	0	0	-Inf	0.0270834	1	Down
ENSBGRG00000015073	ADGRL3	adhesion G protein-coupled receptor L3 [Source:HGNC Symbol;Acc:HGNC:20974]	311.412	81.8397	0.262802	-1.92795	0.023073	1	Down	6	5028		MSTRG.154213.2	MSTRG.154213	0	134.49	Inf	Inf	0.0251217	1	Up	25	1616		bgrcirc_008873	22.2469	0	0	-Inf	0.0270834	1	Down
ENSBGRG00000016981	KIFC1	kinesin family member C1 [Source:HGNC Symbol;Acc:HGNC:6389]	0	27.0988	Inf	Inf	0.0232336	1	Up	24	2151		MSTRG.258650.11	MSTRG.258650	649.741	0	0	-Inf	0.025704	1	Down	9	608		bgrcirc_013197	0	24.5224	Inf	Inf	0.0272317	1	Up
ENSBGRG00000001124	PPOX	protoporphyrinogen oxidase [Source:HGNC Symbol;Acc:HGNC:9280]	49.7772	205.203	4.12243	2.0435	0.0236067	1	Up	3	1442		MSTRG.61962.1	MSTRG.61962	0	134.344	Inf	Inf	0.0257763	1	Up	14	580		bgrcirc_010183	45.9124	4.30418	0.0937478	-3.41507	0.0273414	1	Down
ENSBGRG00000024251	E2F6	E2F transcription factor 6 [Source:HGNC Symbol;Acc:HGNC:3120]	337.758	127.963	0.378859	-1.40027	0.0237042	1	Down	9	996		MSTRG.149054.7	MSTRG.149054	133.823	0	0	-Inf	0.0260353	1	Down	24	1387		bgrcirc_005818	42.8072	2.10162	0.049095	-4.34828	0.0274659	1	Down
ENSBGRG00000025244	SLC27A1	solute carrier family 27 member 1 [Source:HGNC Symbol;Acc:HGNC:10995]	451.828	978.32	2.16525	1.11453	0.0239459	1	Up	8	2712		MSTRG.125658.3	MSTRG.125658	0	549.936	Inf	Inf	0.026309	1	Up	21	2207		bgrcirc_000641	26.2513	0.391289	0.0149055	-6.06801	0.0276008	1	Down
ENSBGRG00000020354	DUSP29	dual specificity phosphatase and pro isomerase domain containing 1 [Source:HGNC Symbol;Acc:HGNC:23481]	278.196	676.578	2.43202	1.28216	0.0243344	1	Up	27	5486		MSTRG.8721.1	MSTRG.8721	134.04	0	0	-Inf	0.0265747	1	Down	1	531		bgrcirc_017627	55.2412	7.4345	0.134583	-2.89344	0.0278166	1	Down
ENSBGRG00000017122	PHC2	polyhomeotic homolog 2 [Source:HGNC Symbol;Acc:HGNC:3183]	165.788	407.428	2.45752	1.2972	0.0244972	1	Up	2	4425		MSTRG.241543.2	MSTRG.241543	133.887	0	0	-Inf	0.0266952	1	Down	8	1987		bgrcirc_008439	22.7905	0	0	-Inf	0.0282754	1	Down
ENSBGRG00000009515	DPP7	dipeptidyl peptidase 7 [Source:HGNC Symbol;Acc:HGNC:14892]	0.316024	31.1673	98.6235	6.62386	0.0245385	1	Up	9	1874		MSTRG.248626.1	MSTRG.248626	132.916	0	0	-Inf	0.026701	1	Down	8	1763		bgrcirc_008744	2.35315	36.2365	15.3991	3.94478	0.0285926	1	Up
ENSBGRG00000012014	ENO1	enolase 1 [Source:HGNC Symbol;Acc:HGNC:3350]	810.813	1661.87	2.04963	1.03536	0.0246562	1	Up	14	2406		MSTRG.244250.1	MSTRG.244250	131.135	0	0	-Inf	0.027081	1	Down	8	615		bgrcirc_014547	23.7493	99.1055	4.17299	2.06108	0.0288814	1	Up
ENSBGRG00000019261	-	-	0	37.1405	Inf	Inf	0.0246747	1	Up	4	7468		MSTRG.8579.1	MSTRG.8579	130.999	0	0	-Inf	0.0274545	1	Down	1	928		bgrcirc_007384	21.8019	0	0	-Inf	0.0291764	1	Down
ENSBGRG00000000523	NR4A1	nuclear receptor subfamily 4 group A member 1 [Source:HGNC Symbol;Acc:HGNC:7980]	409.125	1191.09	2.9113	1.54166	0.0247512	1	Up	5	1867		MSTRG.242136.1	MSTRG.242136	130.153	0	0	-Inf	0.0275445	1	Down	8	2103		bgrcirc_017679	21.8019	0	0	-Inf	0.0291764	1	Down
ENSBGRG00000017836	CSTF3	cleavage stimulation factor subunit 3 [Source:HGNC Symbol;Acc:HGNC:2485]	284.399	97.1157	0.341477	-1.55014	0.0247807	1	Down	13	2154		MSTRG.177006.1	MSTRG.177006	131.826	0	0	-Inf	0.0276838	1	Down	3	1520		bgrcirc_009998	21.8019	0	0	-Inf	0.0291764	1	Down
ENSBGRG00000012277	RRP7A	ribosomal RNA processing 7 homolog A [Source:HGNC Symbol;Acc:HGNC:24286]	55.8793	192.378	3.44274	1.78356	0.025289	1	Up	5	3678		MSTRG.238175.2	MSTRG.238175	0	247.879	Inf	Inf	0.0277408	1	Up	7	1118		bgrcirc_016124	21.8019	0	0	-Inf	0.0291764	1	Down
ENSBGRG00000015957	GLIS2	GLIS family zinc finger 2 [Source:HGNC Symbol;Acc:HGNC:29450]	4.10831	57.91	14.0958	3.8172	0.0253961	1	Up	26	2664		MSTRG.147047.3	MSTRG.147047	0	579.856	Inf	Inf	0.0278452	1	Up	24	2423		bgrcirc_003130	21.8019	0	0	-Inf	0.0291764	1	Down
ENSBGRG00000007270	NLRC4	NLR family CARD domain containing 4 [Source:HGNC Symbol;Acc:HGNC:16412]	27.5451	0	0	-Inf	0.0254299	1	Down	9	3054		MSTRG.91595.2	MSTRG.91595	131.488	0	0	-Inf	0.0281105	1	Down	18	741		bgrcirc_014978	21.8019	0	0	-Inf	0.0291764	1	Down
ENSBGRG00000017666	ZNF527	zinc finger protein 527 [Source:HGNC Symbol;Acc:HGNC:29385]	173.974	47.2223	0.271433	-1.88133	0.0263417	1	Down	20	1864		MSTRG.258650.10	MSTRG.258650	0	479.843	Inf	Inf	0.028145	1	Up	9	608		bgrcirc_013748	0	31.3512	Inf	Inf	0.0307105	1	Up
ENSBGRG00000024826	NACC2	NACC family member 2 [Source:HGNC Symbol;Acc:HGNC:23846]	95.2242	273.323	2.87031	1.52121	0.0264411	1	Up	9	2596		MSTRG.170580.3	MSTRG.170580	91.5216	4164.84	45.5067	5.50801	0.0282059	1	Up	29	446		bgrcirc_001146	22.2022	0	0	-Inf	0.0307546	1	Down
ENSBGRG00000013574	PKM	pyruvate kinase M1/2 [Source:HGNC Symbol;Acc:HGNC:9021]	8518.19	22853.1	2.68286	1.42377	0.0266713	1	Up	11	2426		MSTRG.123644.6	MSTRG.123644	127.722	0	0	-Inf	0.0282119	1	Down	20	489		bgrcirc_011444	327.128	130.48	0.398864	-1.32603	0.0310802	1	Down
ENSBGRG00000008094	KLF10	Kruppel like factor 10 [Source:HGNC Symbol;Acc:HGNC:11810]	1584.62	3306.02	2.08632	1.06096	0.026679	1	Up	18	2163		MSTRG.236152.2	MSTRG.236152	483.679	0	0	-Inf	0.028316	1	Down	7	4149		bgrcirc_009646	21.357	0	0	-Inf	0.0314333	1	Down
ENSBGRG00000023942	CXXC1	CXXC finger protein 1 [Source:HGNC Symbol;Acc:HGNC:24343]	61.0275	205.491	3.36719	1.75154	0.0268678	1	Up	21	2275		MSTRG.251467.2	MSTRG.251467	0	128.217	Inf	Inf	0.0283285	1	Up	9	763		bgrcirc_012891	37.3748	2.73902	0.0732854	-3.77033	0.0316581	1	Down
ENSBGRG00000004761	-	-	26.789	0	0	-Inf	0.0269371	1	Down	8	342		MSTRG.238090.4	MSTRG.238090	0	127.101	Inf	Inf	0.0283892	1	Up	7	849		bgrcirc_011116	30.8292	1.17387	0.0380765	-4.71495	0.031702	1	Down
ENSBGRG00000013875	-	-	41.4884	160.848	3.87694	1.95492	0.0272432	1	Up	17	3001		MSTRG.206701.1	MSTRG.206701	129.807	0	0	-Inf	0.028426	1	Down	5	923		bgrcirc_016248	7.05945	47.2307	6.69042	2.7421	0.031709	1	Up
ENSBGRG00000013181	TAF9	TATA-box binding protein associated factor 9 [Source:HGNC Symbol;Acc:HGNC:11542]	448.915	190.012	0.42327	-1.24035	0.0274287	1	Down	13	792		MSTRG.126807.1	MSTRG.126807	129.408	0	0	-Inf	0.0284807	1	Down	21	994		bgrcirc_012218	5.59617	46.4375	8.29809	3.05278	0.0317514	1	Up
ENSBGRG00000026795	ARID5A	AT-rich interaction domain 5A [Source:HGNC Symbol;Acc:HGNC:17361]	5.62923	59.4889	10.5679	3.40161	0.0275918	1	Up	9	1917		MSTRG.26529.1	MSTRG.26529	128.586	0	0	-Inf	0.0285238	1	Down	11	1674		bgrcirc_015161	44.9387	4.96844	0.11056	-3.17709	0.0320834	1	Down
ENSBGRG00000008356	KIF4A	kinesin family member 4A [Source:HGNC Symbol;Acc:HGNC:13339]	2.09501	45.8478	21.8843	4.45183	0.0276112	1	Up	X	3720		MSTRG.51284.4	MSTRG.51284	573.132	0	0	-Inf	0.0285878	1	Down	13	2939		bgrcirc_008796	22.1873	0	0	-Inf	0.0322696	1	Down
ENSBGRG00000007957	PLCH1	phospholipase C eta 1 [Source:HGNC Symbol;Acc:HGNC:29185]	26.8519	0	0	-Inf	0.0276569	1	Down	1	5565		MSTRG.6247.3	MSTRG.6247	131.351	0	0	-Inf	0.0286099	1	Down	1	1964		bgrcirc_002100	21.1367	0	0	-Inf	0.0326174	1	Down
ENSBGRG00000003703	CENPE	centromere protein E [Source:HGNC Symbol;Acc:HGNC:1856]	2.44417	48.6827	19.9178	4.31599	0.0283888	1	Up	6	7152		MSTRG.185589.1	MSTRG.185589	128.963	0	0	-Inf	0.0288329	1	Down	3	469		bgrcirc_000274	49.1554	5.86934	0.119404	-3.06608	0.0330703	1	Down
ENSBGRG00000023037	CFAP410	cilia and flagella associated protein 410 [Source:HGNC Symbol;Acc:HGNC:1260]	2.21216	45.2039	20.4342	4.35292	0.0284973	1	Up	1	1091		MSTRG.254297.1	MSTRG.254297	128.889	0	0	-Inf	0.0288582	1	Down	9	318		bgrcirc_012814	40.0295	3.5216	0.0879752	-3.50676	0.0332356	1	Down
ENSBGRG00000021343	-	zinc finger protein 444 [Source:HGNC Symbol;Acc:HGNC:16052]	0	50.7293	Inf	Inf	0.028606	1	Up	20	2410		MSTRG.176152.8	MSTRG.176152	129.726	0	0	-Inf	0.0288606	1	Down	3	1957		bgrcirc_012332	167.15	59.0097	0.353034	-1.50212	0.0333586	1	Down
ENSBGRG00000005366	CDC34	cell division cycle 34 [Source:HGNC Symbol;Acc:HGNC:1734]	221.59	513.919	2.31923	1.21365	0.0286464	1	Up	8	1684		MSTRG.189617.1	MSTRG.189617	0	123.373	Inf	Inf	0.0289063	1	Up	4	320		bgrcirc_001785	1.17657	29.5548	25.1193	4.65073	0.033797	1	Up
ENSBGRG00000004287	PPM1J	protein phosphatase, Mg2+/Mn2+ dependent 1J [Source:HGNC Symbol;Acc:HGNC:20785]	22.9551	110.477	4.81276	2.26686	0.0287031	1	Up	3	1911		MSTRG.201353.1	MSTRG.201353	127.686	0	0	-Inf	0.0289131	1	Down	5	781		bgrcirc_014170	20.9121	0	0	-Inf	0.0338668	1	Down
ENSBGRG00000018400	-	-	112.306	23.1724	0.206332	-2.27696	0.0289578	1	Down	25	5694		MSTRG.125703.1	MSTRG.125703	0	126.001	Inf	Inf	0.0290568	1	Up	21	607		bgrcirc_012428	20.9121	0	0	-Inf	0.0338668	1	Down
ENSBGRG00000015268	PTPRK	protein tyrosine phosphatase receptor type K [Source:HGNC Symbol;Acc:HGNC:9674]	474.583	198.156	0.417537	-1.26002	0.0289734	1	Down	10	4820		MSTRG.126761.1	MSTRG.126761	130.156	0	0	-Inf	0.0291817	1	Down	21	1923		bgrcirc_001430	20.9121	0	0	-Inf	0.0338668	1	Down
ENSBGRG00000002717	-	-	844.85	367.774	0.435313	-1.19988	0.0291406	1	Down	8	6141		MSTRG.103046.1	MSTRG.103046	0	125.506	Inf	Inf	0.0292239	1	Up	19	457		bgrcirc_015511	27.5861	0.782579	0.0283685	-5.13956	0.0341432	1	Down
ENSBGRG00000001610	GABPB2	GA binding protein transcription factor subunit beta 2 [Source:HGNC Symbol;Acc:HGNC:28441]	165.753	47.9933	0.289548	-1.78813	0.0292071	1	Down	3	3456		MSTRG.105821.10	MSTRG.105821	501.453	0	0	-Inf	0.029226	1	Down	2	1463		bgrcirc_000387	0	23.5491	Inf	Inf	0.0345369	1	Up
ENSBGRG00000005603	TMEM106A	transmembrane protein 106A [Source:HGNC Symbol;Acc:HGNC:28288]	16.7292	97.8372	5.84829	2.54801	0.0295111	1	Up	19	2064		MSTRG.102098.1	MSTRG.102098	0	126.251	Inf	Inf	0.0295512	1	Up	19	474		bgrcirc_010960	48.0924	5.47805	0.113907	-3.13407	0.0353316	1	Down
ENSBGRG00000019794	CANT1	calcium activated nucleotidase 1 [Source:HGNC Symbol;Acc:HGNC:19721]	29.0533	133.059	4.57981	2.19529	0.0297567	1	Up	19	1227		MSTRG.93087.2	MSTRG.93087	0	125.402	Inf	Inf	0.0296799	1	Up	18	963		bgrcirc_005638	28.8465	0.782579	0.0271291	-5.20402	0.0353438	1	Down
ENSBGRG00000015377	-	-	563.064	260.215	0.462141	-1.11359	0.0300829	1	Down	20	2598		MSTRG.207904.3	MSTRG.207904	127.841	0	0	-Inf	0.0297258	1	Down	5	875		bgrcirc_017114	21.4557	0	0	-Inf	0.0353947	1	Down
ENSBGRG00000019004	CDKL1	cyclin dependent kinase like 1 [Source:HGNC Symbol;Acc:HGNC:1781]	26.3271	0	0	-Inf	0.0302301	1	Down	11	1110		MSTRG.264017.15	MSTRG.264017	948.192	35923.2	37.886	5.24359	0.029944	1	Up	VBZB01000090.1	1698		bgrcirc_005253	0.588287	26.8186	45.5876	5.51057	0.035569	1	Up
ENSBGRG00000002161	POMGNT1	protein O-linked mannose N- acetylglucosaminyltransferase 1 (beta 1,2-) [Source:HGNC Symbol;Acc:HGNC:19139]	149.852	396.944	2.6489	1.40539	0.0307009	1	Up	3	3553		MSTRG.135106.1	MSTRG.135106	0	120.676	Inf	Inf	0.0303188	1	Up	22	1279		bgrcirc_000495	20.4671	0	0	-Inf	0.0364911	1	Down
ENSBGRG00000002355	NIFK	nucleolar protein interacting with the FHA domain of MKI67 [Source:HGNC Symbol;Acc:HGNC:17838]	170.18	48.1657	0.283028	-1.82099	0.0307105	1	Down	2	2291		MSTRG.106647.1	MSTRG.106647	0	121.938	Inf	Inf	0.0303227	1	Up	2	394		bgrcirc_000043	20.4671	0	0	-Inf	0.0364911	1	Down
ENSBGRG00000015854	KLK10	kallikrein related peptidase 10 [Source:HGNC Symbol;Acc:HGNC:6358]	8.8329	74.2643	8.40769	3.07171	0.0307188	1	Up	20	2938		MSTRG.264081.12	MSTRG.264081	463.02	0	0	-Inf	0.0304038	1	Down	VBZB01000110.1	351		bgrcirc_004651	20.4671	0	0	-Inf	0.0364911	1	Down
ENSBGRG00000022005	MEP1B	meprin A subunit beta [Source:HGNC Symbol;Acc:HGNC:7020]	0	25.8726	Inf	Inf	0.0307735	1	Up	21	2103		MSTRG.214220.1	MSTRG.214220	0	120.504	Inf	Inf	0.0304342	1	Up	5	715		bgrcirc_016757	20.4671	0	0	-Inf	0.0364911	1	Down
ENSBGRG00000012539	-	G protein-coupled receptor class C group 5 member C [Source:HGNC Symbol;Acc:HGNC:13309]	127.884	470.177	3.67658	1.87836	0.0309404	1	Up	19	4692		MSTRG.82147.2	MSTRG.82147	124.204	0	0	-Inf	0.0304626	1	Down	17	953		bgrcirc_008745	20.4671	0	0	-Inf	0.0364911	1	Down
ENSBGRG00000019722	-	-	0	25.263	Inf	Inf	0.0313312	1	Up	4	2046		MSTRG.174641.19	MSTRG.174641	162.405	0.308779	0.00190129	-9.03881	0.0306548	1	Down	3	1500		bgrcirc_017949	20.4671	0	0	-Inf	0.0364911	1	Down
ENSBGRG00000005356	SLC9A2	solute carrier family 9 member A2 [Source:HGNC Symbol;Acc:HGNC:11072]	188.975	447.292	2.36694	1.24302	0.0313876	1	Up	9	3473		MSTRG.216134.2	MSTRG.216134	123.251	0	0	-Inf	0.0307425	1	Down	6	633		bgrcirc_008579	21.1541	0	0	-Inf	0.037819	1	Down
ENSBGRG00000003528	WDR75	WD repeat domain 75 [Source:HGNC Symbol;Acc:HGNC:25725]	345.513	141.092	0.408354	-1.29211	0.0314686	1	Down	2	2882		MSTRG.242017.3	MSTRG.242017	0	120.306	Inf	Inf	0.0308744	1	Up	8	1700		bgrcirc_005773	44.4733	3.91289	0.0879829	-3.50663	0.0380372	1	Down
ENSBGRG00000022167	GPI	glucose-6-phosphate isomerase [Source:HGNC Symbol;Acc:HGNC:4458]	2137.26	5481.13	2.56456	1.35871	0.0314794	1	Up	20	1820		MSTRG.141954.1	MSTRG.141954	124.699	0	0	-Inf	0.03101	1	Down	23	971		bgrcirc_006881	0	23.2302	Inf	Inf	0.0383241	1	Up
ENSBGRG00000026091	MVP	major vault protein [Source:HGNC Symbol;Acc:HGNC:7531]	113.534	300.919	2.65047	1.40625	0.0315306	1	Up	26	2684		MSTRG.131955.1	MSTRG.131955	0	123.381	Inf	Inf	0.0311172	1	Up	22	683		bgrcirc_008032	28.9209	1.17387	0.0405888	-4.62277	0.0383935	1	Down
ENSBGRG00000007157	CCDC69	coiled-coil domain containing 69 [Source:HGNC Symbol;Acc:HGNC:24487]	47.6427	184.498	3.87253	1.95328	0.0316277	1	Up	8	1560		MSTRG.197927.1	MSTRG.197927	0	118.704	Inf	Inf	0.0313813	1	Up	4	783		bgrcirc_011740	96.0619	25.6865	0.267396	-1.90295	0.0384184	1	Down
ENSBGRG00000020971	NKRF	NFKB repressing factor [Source:HGNC Symbol;Acc:HGNC:19374]	74.4092	9.10868	0.122413	-3.03017	0.0316365	1	Down	X	2047		MSTRG.76446.1	MSTRG.76446	123.9	0	0	-Inf	0.0315428	1	Down	16	1028		bgrcirc_001356	20.0222	0	0	-Inf	0.0393211	1	Down
ENSBGRG00000017135	PLEKHO1	pleckstrin homology domain containing O1 [Source:HGNC Symbol;Acc:HGNC:24310]	185.409	433.841	2.33992	1.22646	0.0316413	1	Up	3	1230		MSTRG.200606.1	MSTRG.200606	124.203	0	0	-Inf	0.0316102	1	Down	4	685		bgrcirc_014186	20.0222	0	0	-Inf	0.0393211	1	Down
ENSBGRG00000019475	TSEN54	tRNA splicing endonuclease subunit 54 [Source:HGNC Symbol;Acc:HGNC:27561]	15.1865	91.6583	6.0355	2.59347	0.0316421	1	Up	19	3740		MSTRG.187364.1	MSTRG.187364	0	120.951	Inf	Inf	0.0317933	1	Up	3	278		bgrcirc_003718	32.0355	1.95645	0.0610712	-4.03336	0.0406665	1	Down
ENSBGRG00000026412	ACADS	acyl-CoA dehydrogenase short chain [Source:HGNC Symbol;Acc:HGNC:90]	82.2533	311.337	3.7851	1.92033	0.0316778	1	Up	16	1239		MSTRG.84769.1	MSTRG.84769	120.628	0	0	-Inf	0.0318245	1	Down	17	493		bgrcirc_015753	26.2513	0.782579	0.029811	-5.06801	0.0408725	1	Down
ENSBGRG00000012722	CASD1	CAS1 domain containing 1 [Source:HGNC Symbol;Acc:HGNC:16014]	543.609	246.915	0.454215	-1.13855	0.0317944	1	Down	4	3244		MSTRG.146783.1	MSTRG.146783	120.537	0	0	-Inf	0.031948	1	Down	24	1014		bgrcirc_007595	20.0073	0	0	-Inf	0.040931	1	Down
ENSBGRG00000024972	GPSM1	G protein signaling modulator 1 [Source:HGNC Symbol;Acc:HGNC:17858]	4.10831	53.264	12.965	3.69655	0.031844	1	Up	9	3442		MSTRG.119323.3	MSTRG.119323	376.95	0	0	-Inf	0.032037	1	Down	20	1436		bgrcirc_016132	46.5398	4.69547	0.100892	-3.30912	0.0409596	1	Down
ENSBGRG00000009666	PIK3C2B	phosphatidylinositol-4-phosphate 3-kinase catalytic subunit type 2 beta [Source:HGNC Symbol;Acc:HGNC:8972]	270.232	594.076	2.19839	1.13645	0.0318473	1	Up	14	6751		MSTRG.158816.4	MSTRG.158816	123.085	0	0	-Inf	0.0320949	1	Down	26	660		bgrcirc_017113	0	37.6887	Inf	Inf	0.0409612	1	Up
ENSBGRG00000012066	EBF3	EBF transcription factor 3 [Source:HGNC Symbol;Acc:HGNC:19087]	131.225	333.741	2.54328	1.34669	0.0318781	1	Up	25	3051		MSTRG.127765.1	MSTRG.127765	0	121.905	Inf	Inf	0.0324445	1	Up	21	500		bgrcirc_000054	19.864	0	0	-Inf	0.0413942	1	Down
ENSBGRG00000005972	PALM	paralemmin [Source:HGNC Symbol;Acc:HGNC:8594]	35.2311	137.469	3.90192	1.96418	0.0319391	1	Up	8	4605		MSTRG.85264.2	MSTRG.85264	312.454	3.24748	0.0103935	-6.58818	0.0324569	1	Down	17	3293		bgrcirc_004740	0	21.4036	Inf	Inf	0.0414982	1	Up
ENSBGRG00000007368	FAM53B	family with sequence similarity 53 member B [Source:HGNC Symbol;Acc:HGNC:28968]	574.879	2136.14	3.71582	1.89368	0.0319994	1	Up	25	6132		MSTRG.54723.9	MSTRG.54723	443.586	0	0	-Inf	0.0324581	1	Down	13	1453		bgrcirc_016422	115.663	33.579	0.290317	-1.7843	0.0415247	1	Down
ENSBGRG00000007264	TNFSF4	TNF superfamily member 4 [Source:HGNC Symbol;Acc:HGNC:11934]	0	24.5615	Inf	Inf	0.0320457	1	Up	14	549		MSTRG.155383.1	MSTRG.155383	366.63	0	0	-Inf	0.0324802	1	Down	26	5997		bgrcirc_001772	20.2791	0	0	-Inf	0.0418914	1	Down
ENSBGRG00000018363	-	-	110.08	289.398	2.62899	1.39451	0.03217	1	Up	20	1332		MSTRG.73299.1	MSTRG.73299	118.782	0	0	-Inf	0.0325932	1	Down	16	768		bgrcirc_005838	30.3638	98.6493	3.24891	1.69996	0.0419743	1	Up
ENSBGRG00000013639	OAF	out at first homolog [Source:HGNC Symbol;Acc:HGNC:28752]	27.9391	182.937	6.54771	2.71099	0.0323227	1	Up	13	1619		MSTRG.137503.2	MSTRG.137503	355.271	3.67614	0.0103474	-6.59458	0.0328053	1	Down	22	1329		bgrcirc_000958	27.0965	0.536461	0.0197981	-5.65849	0.0420221	1	Down
ENSBGRG00000016176	CHORDC1	cysteine and histidine rich domain containing 1 [Source:HGNC Symbol;Acc:HGNC:14525]	671.036	322.399	0.48045	-1.05754	0.0326272	1	Down	29	6251		MSTRG.172310.1	MSTRG.172310	0	176.779	Inf	Inf	0.0328787	1	Up	29	417		bgrcirc_009955	86.5935	14.6518	0.169202	-2.56318	0.0421922	1	Down
ENSBGRG00000002916	GPD1	glycerol-3-phosphate dehydrogenase 1 [Source:HGNC Symbol;Acc:HGNC:4455]	1199.47	3085.24	2.57217	1.36298	0.0328189	1	Up	5	1263		MSTRG.268918.2	MSTRG.268918	0	346.783	Inf	Inf	0.032907	1	Up	X	2093		bgrcirc_017320	19.5773	0	0	-Inf	0.042373	1	Down
ENSBGRG00000011514	-	-	25.5393	0	0	-Inf	0.0328417	1	Down	8	2352		MSTRG.12712.1	MSTRG.12712	118.746	0	0	-Inf	0.0329624	1	Down	1	556		bgrcirc_012487	19.5773	0	0	-Inf	0.042373	1	Down
ENSBGRG00000012849	SLC45A3	solute carrier family 45 member 3 [Source:HGNC Symbol;Acc:HGNC:8642]	0	24.9637	Inf	Inf	0.0331045	1	Up	14	2557		MSTRG.240218.1	MSTRG.240218	119.94	0	0	-Inf	0.0331935	1	Down	8	663		bgrcirc_015202	19.5773	0	0	-Inf	0.042373	1	Down
ENSBGRG00000010990	NCDN	neurochondrin [Source:HGNC Symbol;Acc:HGNC:17597]	35.6019	139.653	3.92263	1.97182	0.0334071	1	Up	3	3453		MSTRG.253068.1	MSTRG.253068	0	115.561	Inf	Inf	0.0332087	1	Up	9	576		bgrcirc_009525	19.5773	0	0	-Inf	0.042373	1	Down
ENSBGRG00000020251	-	-	25.733	0	0	-Inf	0.0340844	1	Down	19	1552		MSTRG.65371.1	MSTRG.65371	0	118.316	Inf	Inf	0.0334317	1	Up	14	442		bgrcirc_013454	19.5773	0	0	-Inf	0.042373	1	Down
ENSBGRG00000006896	TRIP13	thyroid hormone receptor interactor 13 [Source:HGNC Symbol;Acc:HGNC:12307]	30.1465	0.270481	0.00897222	-6.80032	0.0341342	1	Down	23	3118		MSTRG.224205.2	MSTRG.224205	119.942	0	0	-Inf	0.0335795	1	Down	6	1609		bgrcirc_016658	19.5773	0	0	-Inf	0.042373	1	Down
ENSBGRG00000011023	TMEM88	transmembrane protein 88 [Source:HGNC Symbol;Acc:HGNC:32371]	0	24.5093	Inf	Inf	0.0343793	1	Up	19	480		MSTRG.256996.1	MSTRG.256996	121.728	0	0	-Inf	0.0336877	1	Down	9	619		bgrcirc_000037	19.5773	0	0	-Inf	0.042373	1	Down
ENSBGRG00000005859	TADA1	transcriptional adaptor 1 [Source:HGNC Symbol;Acc:HGNC:30631]	511.872	230.177	0.449678	-1.15304	0.0344563	1	Down	3	3180		MSTRG.201574.2	MSTRG.201574	0	117.907	Inf	Inf	0.0337244	1	Up	5	1087		bgrcirc_013738	19.5773	0	0	-Inf	0.042373	1	Down
ENSBGRG00000010949	CYP2D6	cytochrome P450 family 2 subfamily D member 6 [Source:HGNC Symbol;Acc:HGNC:2625]	0	29.7839	Inf	Inf	0.0344844	1	Up	5	2573		MSTRG.130036.2	MSTRG.130036	118.635	0	0	-Inf	0.0338988	1	Down	21	936		bgrcirc_006779	19.5773	0	0	-Inf	0.042373	1	Down
ENSBGRG00000012165	-	-	75.7989	219.483	2.8956	1.53386	0.0345608	1	Up	2	1632		MSTRG.245158.1	MSTRG.245158	117.169	0	0	-Inf	0.0340199	1	Down	8	685		bgrcirc_013840	47.4054	6.65192	0.14032	-2.83321	0.0425087	1	Down
ENSBGRG00000008276	SLC25A25	solute carrier family 25 member 25 [Source:HGNC Symbol;Acc:HGNC:20663]	222.84	1044.68	4.68803	2.22898	0.0345897	1	Up	9	5426		MSTRG.64386.1	MSTRG.64386	0	114.419	Inf	Inf	0.034288	1	Up	14	786		bgrcirc_001496	10.5892	48.4542	4.57583	2.19403	0.0427693	1	Up
ENSBGRG00000003433	-	-	54.2249	2.61747	0.0482706	-4.37271	0.0347625	1	Down	1	1377		MSTRG.65023.1	MSTRG.65023	0	379.955	Inf	Inf	0.0343212	1	Up	14	1376		bgrcirc_009595	31.5906	1.95645	0.0619313	-4.01319	0.0427833	1	Down
ENSBGRG00000012956	PSD3	pleckstrin and Sec7 domain containing 3 [Source:HGNC Symbol;Acc:HGNC:19093]	171.623	397.081	2.31368	1.21019	0.0354472	1	Up	28	4997		MSTRG.6095.4	MSTRG.6095	322.362	0	0	-Inf	0.0346154	1	Down	1	4783		bgrcirc_010154	39.7913	1.17387	0.0295006	-5.08311	0.0429962	1	Down
ENSBGRG00000011174	-	-	33.803	136.091	4.02599	2.00934	0.0355868	1	Up	18	1615		MSTRG.47734.1	MSTRG.47734	119.143	0	0	-Inf	0.0346889	1	Down	12	989		bgrcirc_008592	19.2757	0	0	-Inf	0.0451273	1	Down
ENSBGRG00000009234	-	-	17.0481	95.6994	5.61349	2.4889	0.0356433	1	Up	X	1236		MSTRG.2139.2	MSTRG.2139	119.413	0	0	-Inf	0.0347295	1	Down	1	1209		bgrcirc_017566	19.8342	0	0	-Inf	0.0451563	1	Down
ENSBGRG00000001765	DIP2A	disco interacting protein 2 homolog A [Source:HGNC Symbol;Acc:HGNC:17217]	129.385	429.909	3.3227	1.73236	0.0359294	1	Up	1	4729		MSTRG.264017.29	MSTRG.264017	1553.12	50663.6	32.6205	5.0277	0.035062	1	Up	VBZB01000090.1	2739		bgrcirc_010020	19.1323	0	0	-Inf	0.0456643	1	Down
ENSBGRG00000021836	TPI1	triosephosphate isomerase 1 [Source:HGNC Symbol;Acc:HGNC:12009]	6793.35	14810.5	2.18015	1.12443	0.0359407	1	Up	5	1301		MSTRG.190135.23	MSTRG.190135	346.508	0	0	-Inf	0.035096	1	Down	4	2250		bgrcirc_003704	19.1323	0	0	-Inf	0.0456643	1	Down
ENSBGRG00000007004	NKD2	NKD inhibitor of WNT signaling pathway 2 [Source:HGNC Symbol;Acc:HGNC:17046]	41.7017	149.765	3.59134	1.84452	0.0363807	1	Up	23	3351		MSTRG.92042.7	MSTRG.92042	117.282	0	0	-Inf	0.0353119	1	Down	18	532		bgrcirc_014640	19.1323	0	0	-Inf	0.0456643	1	Down
ENSBGRG00000022016	TCOF1	treacle ribosome biogenesis factor 1 [Source:HGNC Symbol;Acc:HGNC:11654]	298.292	620.195	2.07915	1.056	0.0364737	1	Up	8	4908		MSTRG.264178.24	MSTRG.264178	0	300.218	Inf	Inf	0.035336	1	Up	VBZB01000197.1	1100		bgrcirc_004372	19.1323	0	0	-Inf	0.0456643	1	Down
ENSBGRG00000020214	CBX2	chromobox 2 [Source:HGNC Symbol;Acc:HGNC:1552]	1.74584	40.0355	22.932	4.51929	0.0365662	1	Up	19	1725		MSTRG.12333.1	MSTRG.12333	0	115.843	Inf	Inf	0.0354509	1	Up	1	931		bgrcirc_006862	19.1323	0	0	-Inf	0.0456643	1	Down
ENSBGRG00000026875	ACSF3	acyl-CoA synthetase family member 3 [Source:HGNC Symbol;Acc:HGNC:27288]	9.78415	71.9207	7.35074	2.87789	0.0366582	1	Up	20	2304		MSTRG.62545.1	MSTRG.62545	115.786	0	0	-Inf	0.035639	1	Down	14	558		bgrcirc_004724	19.1323	0	0	-Inf	0.0456643	1	Down
ENSBGRG00000021751	-	-	1.01436	34.5928	34.1031	5.09183	0.0368621	1	Up	16	2875		MSTRG.214256.3	MSTRG.214256	116.461	0	0	-Inf	0.0356899	1	Down	5	778		bgrcirc_005118	29.3659	1.56516	0.0532985	-4.22976	0.0457227	1	Down
ENSBGRG00000023143	ARHGAP27	Rho GTPase activating protein 27 [Source:HGNC Symbol;Acc:HGNC:31813]	11.2751	114.826	10.184	3.34823	0.0369167	1	Up	19	3757		MSTRG.148618.1	MSTRG.148618	114.648	0	0	-Inf	0.0357191	1	Down	24	689		bgrcirc_002555	2.94144	33.1141	11.2578	3.49285	0.0460531	1	Up
ENSBGRG00000024893	QSOX2	quiescin sulfhydryl oxidase 2 [Source:HGNC Symbol;Acc:HGNC:30249]	68.6334	205.133	2.98883	1.57958	0.0369282	1	Up	9	4332		MSTRG.244654.1	MSTRG.244654	115.007	0	0	-Inf	0.0358523	1	Down	8	896		bgrcirc_017399	28.0013	1.17387	0.0419219	-4.57615	0.0465412	1	Down
ENSBGRG00000021778	FAM13A	family with sequence similarity 13 member A [Source:HGNC Symbol;Acc:HGNC:19367]	1650.2	752.895	0.456243	-1.13212	0.0373242	1	Down	6	4869		MSTRG.38079.1	MSTRG.38079	0	114.549	Inf	Inf	0.0366568	1	Up	12	568		bgrcirc_015749	22.6918	0.391289	0.0172436	-5.85779	0.04657	1	Down
ENSBGRG00000026122	SLIT1	slit guidance ligand 1 [Source:HGNC Symbol;Acc:HGNC:11085]	0	24.7022	Inf	Inf	0.0374783	1	Up	25	4602		MSTRG.189107.1	MSTRG.189107	113.58	0	0	-Inf	0.0368056	1	Down	4	678		bgrcirc_010805	19.8193	0	0	-Inf	0.0473989	1	Down
ENSBGRG00000005700	SMIM26	small integral membrane protein 26 [Source:HGNC Symbol;Acc:HGNC:43430]	65.3715	6.71695	0.10275	-3.28278	0.037633	1	Down	12	273		MSTRG.4823.2	MSTRG.4823	167.255	0.617559	0.00369232	-8.08126	0.0369827	1	Down	1	867		bgrcirc_000573	4.7063	38.3599	8.15076	3.02693	0.0479822	1	Up
ENSBGRG00000020363	RUSC1	RUN and SH3 domain containing 1 [Source:HGNC Symbol;Acc:HGNC:17153]	58.296	181.911	3.12047	1.64176	0.0377342	1	Up	3	2718		MSTRG.54723.24	MSTRG.54723	114.379	0	0	-Inf	0.0371194	1	Down	13	2205		bgrcirc_008406	27.1412	1.17387	0.0432504	-4.53114	0.0480376	1	Down
ENSBGRG00000009051	ACVR1C	activin A receptor type 1C [Source:HGNC Symbol;Acc:HGNC:18123]	116.586	9.46685	0.0812005	-3.62237	0.0384448	1	Down	2	3770		MSTRG.194072.5	MSTRG.194072	150.622	0	0	-Inf	0.0372082	1	Down	4	4370		bgrcirc_001482	232.494	89.427	0.384642	-1.37841	0.0485223	1	Down
ENSBGRG00000013842	ACAP3	ArfGAP with coiled-coil, ankyrin repeat and PH domains 3 [Source:HGNC Symbol;Acc:HGNC:16754]	29.7844	143.529	4.81894	2.26872	0.0385736	1	Up	14	2502		MSTRG.78337.1	MSTRG.78337	0	112.27	Inf	Inf	0.0372982	1	Up	16	556		bgrcirc_000767	24.9165	0.782579	0.031408	-4.99272	0.0489089	1	Down
ENSBGRG00000025108	C7orf50	chromosome 7 open reading frame 50 [Source:HGNC Symbol;Acc:HGNC:22421]	1.26409	36.4027	28.7975	4.84787	0.0386723	1	Up	26	612		MSTRG.266221.1	MSTRG.266221	114.034	0	0	-Inf	0.0374017	1	Down	X	757		bgrcirc_009741	0	20.3304	Inf	Inf	0.0491766	1	Up
ENSBGRG00000019825	MTERF1	mitochondrial transcription termination factor 1 [Source:HGNC Symbol;Acc:HGNC:21463]	140.915	37.3063	0.264744	-1.91733	0.0389137	1	Down	4	1628		MSTRG.4823.5	MSTRG.4823	0	262.844	Inf	Inf	0.0377328	1	Up	1	4022		bgrcirc_013114	18.6874	0	0	-Inf	0.049214	1	Down
ENSBGRG00000015947	-	-	100.124	18.2619	0.182392	-2.45488	0.0392366	1	Down	10	1004		MSTRG.190068.1	MSTRG.190068	268.047	0	0	-Inf	0.0379221	1	Down	4	3005		bgrcirc_007435	18.6874	0	0	-Inf	0.049214	1	Down
ENSBGRG00000023432	IL10RA	interleukin 10 receptor subunit alpha [Source:HGNC Symbol;Acc:HGNC:5964]	2.67832	45.9428	17.1536	4.10044	0.0393734	1	Up	13	1781		MSTRG.66597.2	MSTRG.66597	112.263	0	0	-Inf	0.0379585	1	Down	15	807		bgrcirc_009168	18.6874	0	0	-Inf	0.049214	1	Down
ENSBGRG00000021648	ENPP1	ectonucleotide pyrophosphatase/phosphodiesterase 1 [Source:HGNC Symbol;Acc:HGNC:3356]	2255.36	1056.2	0.468305	-1.09448	0.0394655	1	Down	10	3212		MSTRG.30401.1	MSTRG.30401	114.22	0	0	-Inf	0.0380051	1	Down	11	684		bgrcirc_006572	18.6874	0	0	-Inf	0.049214	1	Down
ENSBGRG00000020445	CBX4	chromobox 4 [Source:HGNC Symbol;Acc:HGNC:1554]	2.3623	45.0832	19.0844	4.25433	0.0399317	1	Up	19	2653		MSTRG.160254.5	MSTRG.160254	0	110.485	Inf	Inf	0.0380263	1	Up	26	690		bgrcirc_017390	18.6874	0	0	-Inf	0.049214	1	Down
ENSBGRG00000005949	ARHGEF39	Rho guanine nucleotide exchange factor 39 [Source:HGNC Symbol;Acc:HGNC:25909]	0	24.6502	Inf	Inf	0.0402324	1	Up	7	1008		MSTRG.163310.14	MSTRG.163310	0	259.066	Inf	Inf	0.0381648	1	Up	27	743		bgrcirc_014511	18.6874	0	0	-Inf	0.049214	1	Down
ENSBGRG00000025082	PKP1	plakophilin 1 [Source:HGNC Symbol;Acc:HGNC:9023]	0	23.2668	Inf	Inf	0.040269	1	Up	14	5293		MSTRG.42867.6	MSTRG.42867	263.973	0	0	-Inf	0.0382102	1	Down	12	636		bgrcirc_006300	18.6874	0	0	-Inf	0.049214	1	Down
ENSBGRG00000010670	EIF1AX	eukaryotic translation initiation factor 1A X- linked [Source:HGNC Symbol;Acc:HGNC:3250]	285.48	115.197	0.403519	-1.30929	0.040393	1	Down	X	615		MSTRG.263526.2	MSTRG.263526	145.644	0.308779	0.0021201	-8.88165	0.0382864	1	Down	9	1268		bgrcirc_007491	18.6874	0	0	-Inf	0.049214	1	Down
ENSBGRG00000000257	SLX9	family with sequence similarity 207 member A [Source:HGNC Symbol;Acc:HGNC:15811]	0.948071	55.5858	58.6304	5.87358	0.0408767	1	Up	1	660		MSTRG.86742.1	MSTRG.86742	111.3	0	0	-Inf	0.0382908	1	Down	17	847		bgrcirc_004166	18.6874	0	0	-Inf	0.049214	1	Down
ENSBGRG00000018643	GATAD1	GATA zinc finger domain containing 1 [Source:HGNC Symbol;Acc:HGNC:29941]	320.614	126.3	0.393931	-1.34398	0.0409378	1	Down	4	819		MSTRG.118847.1	MSTRG.118847	0	107.885	Inf	Inf	0.0383677	1	Up	20	390		bgrcirc_013862	18.6874	0	0	-Inf	0.049214	1	Down
ENSBGRG00000021547	FBXL3	F-box and leucine rich repeat protein 3 [Source:HGNC Symbol;Acc:HGNC:13599]	617.982	304.348	0.492488	-1.02184	0.040947	1	Down	15	1287		MSTRG.273768.2	MSTRG.273768	316.372	0	0	-Inf	0.0383693	1	Down	X	1668		bgrcirc_013729	101.816	31.1801	0.306239	-1.70727	0.0493715	1	Down
ENSBGRG00000006341	NRDE2	NRDE-2, necessary for RNA interference, domain containing [Source:HGNC Symbol;Acc:HGNC:20186]	97.5475	262.851	2.6946	1.43007	0.0411581	1	Up	11	3958		MSTRG.189803.1	MSTRG.189803	0	111.256	Inf	Inf	0.0384449	1	Up	4	489		bgrcirc_004909	1983.7	955.177	0.481512	-1.05436	0.0495252	1	Down
ENSBGRG00000004297	LYNX1	Ly6/neurotoxin 1 [Source:HGNC Symbol;Acc:HGNC:29604]	398.14	828.378	2.08062	1.05701	0.0414259	1	Up	18	1241		MSTRG.64523.2	MSTRG.64523	0	107.69	Inf	Inf	0.0384688	1	Up	14	1676		bgrcirc_012057	22.2469	0.391289	0.0175885	-5.82922	0.0497125	1	Down
ENSBGRG00000024980	TEX15	testis expressed 15, meiosis and synapsis associated [Source:HGNC Symbol;Acc:HGNC:11738]	23.8553	0	0	-Inf	0.0414891	1	Down	28	7974		MSTRG.114295.1	MSTRG.114295	113.24	0	0	-Inf	0.0384993	1	Down	2	693		bgrcirc_016930	29.1928	1.56516	0.0536146	-4.22123	0.0497224	1	Down
ENSBGRG00000025901	RNPEP	arginyl aminopeptidase [Source:HGNC Symbol;Acc:HGNC:10078]	17.639	91.4516	5.18462	2.37424	0.0414922	1	Up	14	3090		MSTRG.174641.21	MSTRG.174641	259.9	0	0	-Inf	0.038505	1	Down	3	1501		bgrcirc_012425	19.8044	0	0	-Inf	0.0499503	1	Down
ENSBGRG00000020719	-	-	368.475	153.487	0.416547	-1.26345	0.0415592	1	Down	25	887		MSTRG.57900.1	MSTRG.57900	110.935	0	0	-Inf	0.0385381	1	Down	14	1198
ENSBGRG00000017276	CKAP4	cytoskeleton associated protein 4 [Source:HGNC Symbol;Acc:HGNC:16991]	44.4644	151.918	3.41661	1.77257	0.0415991	1	Up	5	1770		MSTRG.2676.5	MSTRG.2676	486.124	8.64582	0.0177852	-5.81318	0.0387571	1	Down	1	1669
ENSBGRG00000026320	BTG2	BTG anti-proliferation factor 2 [Source:HGNC Symbol;Acc:HGNC:1131]	26.1945	113.734	4.34191	2.11833	0.0417124	1	Up	14	477		MSTRG.275766.1	MSTRG.275766	109.776	0	0	-Inf	0.0387695	1	Down	Y	613
ENSBGRG00000007226	-	-	3.47626	49.5028	14.2402	3.8319	0.041873	1	Up	Y	1341		MSTRG.103037.1	MSTRG.103037	112.327	0	0	-Inf	0.0389099	1	Down	19	627
ENSBGRG00000016292	TECPR2	tectonin beta-propeller repeat containing 2 [Source:HGNC Symbol;Acc:HGNC:19957]	134.268	324.063	2.41356	1.27116	0.0420848	1	Up	17	5445		MSTRG.125726.1	MSTRG.125726	0	109.493	Inf	Inf	0.0389618	1	Up	21	361
ENSBGRG00000008036	DTX2	deltex E3 ubiquitin ligase 2 [Source:HGNC Symbol;Acc:HGNC:15973]	64.2538	202.337	3.14904	1.65491	0.0422109	1	Up	26	3116		MSTRG.150386.13	MSTRG.150386	483.414	9.74244	0.0201534	-5.63283	0.0390276	1	Down	25	3290
ENSBGRG00000025454	IGDCC4	immunoglobulin superfamily DCC subclass member 4 [Source:HGNC Symbol;Acc:HGNC:13770]	234.932	668.042	2.84356	1.5077	0.0422359	1	Up	11	4439		MSTRG.61312.1	MSTRG.61312	0	109.65	Inf	Inf	0.0391046	1	Up	14	526
ENSBGRG00000026252	PXN	paxillin [Source:HGNC Symbol;Acc:HGNC:9718]	294.616	624.317	2.11908	1.08344	0.042246	1	Up	16	3201		MSTRG.14793.1	MSTRG.14793	0	107.984	Inf	Inf	0.0393048	1	Up	1	636
ENSBGRG00000017840	ARF6	ADP ribosylation factor 6 [Source:HGNC Symbol;Acc:HGNC:659]	38.5124	137.949	3.58194	1.84074	0.0422709	1	Up	11	528		MSTRG.97925.5	MSTRG.97925	0	287.222	Inf	Inf	0.039409	1	Up	19	2363
ENSBGRG00000023872	SLCO2B1	solute carrier organic anion transporter family member 2B1 [Source:HGNC Symbol;Acc:HGNC:10962]	54.8148	180.184	3.28715	1.71684	0.0422771	1	Up	13	2368		MSTRG.103034.1	MSTRG.103034	109.171	0	0	-Inf	0.0394333	1	Down	19	1467
ENSBGRG00000025536	PLOD3	procollagen-lysine,2-oxoglutarate 5-dioxygenase 3 [Source:HGNC Symbol;Acc:HGNC:9083]	61.7728	191.759	3.10426	1.63425	0.0423293	1	Up	26	2557		MSTRG.184717.2	MSTRG.184717	242.5	0	0	-Inf	0.0396533	1	Down	3	3501
ENSBGRG00000017727	ILVBL	ilvB acetolactate synthase like [Source:HGNC Symbol;Acc:HGNC:6041]	41.6996	147.064	3.52676	1.81834	0.042546	1	Up	8	2055		MSTRG.125658.4	MSTRG.125658	244.691	0	0	-Inf	0.0396694	1	Down	21	2292
ENSBGRG00000014538	PABPC1L	poly(A) binding protein cytoplasmic 1 like [Source:HGNC Symbol;Acc:HGNC:15797]	0.316024	28.554	90.3539	6.49751	0.0426319	1	Up	12	3093		MSTRG.64522.4	MSTRG.64522	243.062	0	0	-Inf	0.0398005	1	Down	14	1243
ENSBGRG00000015535	-	-	161.614	35.9792	0.222624	-2.16732	0.0427648	1	Down	24	2526		MSTRG.93444.1	MSTRG.93444	0	107.883	Inf	Inf	0.039877	1	Up	18	634
ENSBGRG00000012778	CDH1	cadherin 1 [Source:HGNC Symbol;Acc:HGNC:1748]	23.6435	0	0	-Inf	0.0429046	1	Down	20	2649		MSTRG.201653.1	MSTRG.201653	108.769	0	0	-Inf	0.0398844	1	Down	5	1685
ENSBGRG00000014533	-	-	3.67512	49.499	13.4687	3.75154	0.0429397	1	Up	29	890		MSTRG.9632.4	MSTRG.9632	292.394	0	0	-Inf	0.0398946	1	Down	1	2146
ENSBGRG00000014041	-	-	432.029	999.308	2.31306	1.2098	0.0430835	1	Up	20	3284		MSTRG.66148.2	MSTRG.66148	291.062	0	0	-Inf	0.0399848	1	Down	15	437
ENSBGRG00000017288	ADGRG1	adhesion G protein-coupled receptor G1 [Source:HGNC Symbol;Acc:HGNC:4512]	56.9443	176.949	3.10741	1.63571	0.0435203	1	Up	20	3667		MSTRG.125658.6	MSTRG.125658	0	277.84	Inf	Inf	0.0400604	1	Up	21	2795
ENSBGRG00000017549	TLR2	toll like receptor 2 [Source:HGNC Symbol;Acc:HGNC:11848]	23.8099	0	0	-Inf	0.0436242	1	Down	16	4360		MSTRG.189482.8	MSTRG.189482	109.311	0	0	-Inf	0.0402312	1	Down	4	458
ENSBGRG00000024506	NR2F6	nuclear receptor subfamily 2 group F member 6 [Source:HGNC Symbol;Acc:HGNC:7977]	26.0552	198.601	7.6223	2.93023	0.0436369	1	Up	8	1215		MSTRG.177040.1	MSTRG.177040	110.032	0	0	-Inf	0.0402605	1	Down	3	1319
ENSBGRG00000025628	FBRS	fibrosin [Source:HGNC Symbol;Acc:HGNC:20442]	22.3866	109.372	4.88562	2.28854	0.0437169	1	Up	26	3196		MSTRG.193324.1	MSTRG.193324	0	104.982	Inf	Inf	0.0405706	1	Up	4	503
ENSBGRG00000024885	UBALD2	UBA like domain containing 2 [Source:HGNC Symbol;Acc:HGNC:28438]	368.409	754.72	2.04859	1.03463	0.043739	1	Up	19	864		MSTRG.95518.3	MSTRG.95518	219.557	0	0	-Inf	0.0407667	1	Down	19	1972
ENSBGRG00000025584	CILP	cartilage intermediate layer protein [Source:HGNC Symbol;Acc:HGNC:1980]	1068.22	2180.73	2.04146	1.0296	0.0437949	1	Up	11	3555		MSTRG.62282.9	MSTRG.62282	109.06	0	0	-Inf	0.0409895	1	Down	14	509
ENSBGRG00000026145	ALDH2	aldehyde dehydrogenase 2 family member [Source:HGNC Symbol;Acc:HGNC:404]	749.802	1946.24	2.59567	1.37611	0.0438301	1	Up	16	1563		MSTRG.261086.1	MSTRG.261086	0	104.469	Inf	Inf	0.041008	1	Up	9	387
ENSBGRG00000007772	METRNL	meteorin like, glial cell differentiation regulator [Source:HGNC Symbol;Acc:HGNC:27584]	36.4185	133.656	3.67	1.87578	0.0438851	1	Up	19	1403		MSTRG.249148.2	MSTRG.249148	0	263.768	Inf	Inf	0.0411015	1	Up	8	2650
ENSBGRG00000012965	SCN3B	sodium voltage-gated channel beta subunit 3 [Source:HGNC Symbol;Acc:HGNC:20665]	157.212	38.7964	0.246778	-2.01871	0.0439702	1	Down	13	1444		MSTRG.202445.1	MSTRG.202445	108.216	0	0	-Inf	0.0411555	1	Down	5	700
ENSBGRG00000003404	ALDH4A1	aldehyde dehydrogenase 4 family member A1 [Source:HGNC Symbol;Acc:HGNC:406]	64.1786	195.056	3.03926	1.60372	0.0439828	1	Up	2	3260		MSTRG.78502.4	MSTRG.78502	0	104.187	Inf	Inf	0.0412438	1	Up	16	1582
ENSBGRG00000022558	SLC25A53	solute carrier family 25 member 53 [Source:HGNC Symbol;Acc:HGNC:31894]	0.349168	27.49	78.7301	6.29884	0.0439864	1	Up	X	1905		MSTRG.101068.3	MSTRG.101068	109.096	0	0	-Inf	0.0413538	1	Down	19	467
ENSBGRG00000018131	-	-	0	49.4643	Inf	Inf	0.0441531	1	Up	26	829		MSTRG.210986.1	MSTRG.210986	0	105.068	Inf	Inf	0.041503	1	Up	5	1313
ENSBGRG00000014023	ADA	adenosine deaminase [Source:HGNC Symbol;Acc:HGNC:186]	21.2154	100.638	4.74364	2.246	0.0443166	1	Up	12	3121		MSTRG.236043.1	MSTRG.236043	109.982	0	0	-Inf	0.0415175	1	Down	7	806
ENSBGRG00000021840	OSR1	odd-skipped related transcription factor 1 [Source:HGNC Symbol;Acc:HGNC:8111]	2.09501	38.7884	18.5147	4.2106	0.0443903	1	Up	9	1890		MSTRG.31155.1	MSTRG.31155	107.082	0	0	-Inf	0.0416272	1	Down	11	871
ENSBGRG00000025104	DNLZ	DNL-type zinc finger [Source:HGNC Symbol;Acc:HGNC:33879]	14.1658	95.1358	6.71589	2.74758	0.044572	1	Up	9	802		MSTRG.27125.2	MSTRG.27125	107.31	0	0	-Inf	0.0417431	1	Down	11	1077
ENSBGRG00000018040	CD14	CD14 molecule [Source:HGNC Symbol;Acc:HGNC:1628]	15.5894	87.4966	5.61257	2.48866	0.0447178	1	Up	8	1122		MSTRG.214797.1	MSTRG.214797	0	127.169	Inf	Inf	0.0417896	1	Up	5	551
ENSBGRG00000021593	-	-	286.886	110.601	0.385521	-1.37512	0.0449395	1	Down	16	1521		MSTRG.156282.4	MSTRG.156282	0	145.698	Inf	Inf	0.0418606	1	Up	26	1093
ENSBGRG00000001755	-	-	67.1791	192.647	2.86767	1.51988	0.0450953	1	Up	1	303		MSTRG.189598.1	MSTRG.189598	135.115	0.306345	0.00226729	-8.78481	0.0418694	1	Down	4	1099
ENSBGRG00000008503	SGSM3	small G protein signaling modulator 3 [Source:HGNC Symbol;Acc:HGNC:25228]	201.839	459.838	2.27824	1.18792	0.0456089	1	Up	5	2466		MSTRG.201183.4	MSTRG.201183	242.102	0	0	-Inf	0.0419037	1	Down	5	1244
ENSBGRG00000014981	FKBP5	FKBP prolyl isomerase 5 [Source:HGNC Symbol;Acc:HGNC:3721]	6126.91	2269.08	0.370346	-1.43305	0.0456268	1	Down	24	1558		MSTRG.264017.31	MSTRG.264017	374.394	47115.2	125.844	6.97549	0.0420305	1	Up	VBZB01000090.1	1516
ENSBGRG00000004337	KCNH2	potassium voltage-gated channel subfamily H member 2 [Source:HGNC Symbol;Acc:HGNC:6251]	0.698335	30.0996	43.1019	5.42968	0.0456471	1	Up	4	2858		MSTRG.214767.1	MSTRG.214767	106.077	0	0	-Inf	0.0420999	1	Down	5	310
ENSBGRG00000009096	FOS	Fos proto-oncogene, AP-1 transcription factor subunit [Source:HGNC Symbol;Acc:HGNC:3796]	213.77	854.563	3.99758	1.99913	0.0457331	1	Up	11	1862		MSTRG.102501.1	MSTRG.102501	107.56	0	0	-Inf	0.0421095	1	Down	19	868
ENSBGRG00000021195	LAMA5	laminin subunit alpha 5 [Source:HGNC Symbol;Acc:HGNC:6485]	284.32	834.563	2.93529	1.5535	0.0460662	1	Up	12	11652		MSTRG.240844.1	MSTRG.240844	0	106.689	Inf	Inf	0.0423745	1	Up	8	432
ENSBGRG00000013936	MYBBP1A	MYB binding protein 1a [Source:HGNC Symbol;Acc:HGNC:7546]	313.077	642.896	2.05348	1.03807	0.046163	1	Up	19	4649		MSTRG.3906.17	MSTRG.3906	0	209.352	Inf	Inf	0.042393	1	Up	1	2116
ENSBGRG00000024327	PLXNA2	plexin A2 [Source:HGNC Symbol;Acc:HGNC:9100]	269.596	556.423	2.06392	1.04538	0.0463675	1	Up	14	6925		MSTRG.2715.3	MSTRG.2715	255.739	3.19543	0.0124949	-6.32252	0.0424173	1	Down	1	1415
ENSBGRG00000008923	PTGES2	prostaglandin E synthase 2 [Source:HGNC Symbol;Acc:HGNC:17822]	220.083	544.881	2.4758	1.30789	0.04664	1	Up	9	2498		MSTRG.85199.2	MSTRG.85199	0	209.044	Inf	Inf	0.0424239	1	Up	17	1706
ENSBGRG00000006836	CHPF2	chondroitin polymerizing factor 2 [Source:HGNC Symbol;Acc:HGNC:29270]	5.3724	68.6515	12.7786	3.67565	0.046986	1	Up	4	2298		MSTRG.256821.1	MSTRG.256821	107.012	0	0	-Inf	0.0425653	1	Down	9	629
ENSBGRG00000007196	-	-	0	23.2507	Inf	Inf	0.0470646	1	Up	8	2036		MSTRG.109430.17	MSTRG.109430	0	207.191	Inf	Inf	0.0426104	1	Up	2	1431
ENSBGRG00000018133	-	-	57.6479	206.919	3.58936	1.84373	0.0470674	1	Up	8	1221		MSTRG.61331.2	MSTRG.61331	108.496	0	0	-Inf	0.0426422	1	Down	14	422
ENSBGRG00000026146	-	-	11.7923	79.2081	6.71693	2.7478	0.0470756	1	Up	21	708		MSTRG.34686.1	MSTRG.34686	0	103.483	Inf	Inf	0.0429021	1	Up	11	723
ENSBGRG00000017016	CLEC11A	C-type lectin domain containing 11A [Source:HGNC Symbol;Acc:HGNC:10576]	0	22.2217	Inf	Inf	0.0470953	1	Up	20	1213		MSTRG.273832.1	MSTRG.273832	0	102.033	Inf	Inf	0.043135	1	Up	X	378
ENSBGRG00000025786	ARID5B	AT-rich interaction domain 5B [Source:HGNC Symbol;Acc:HGNC:17362]	2186.9	1064.76	0.486882	-1.03835	0.0473612	1	Down	27	5547		MSTRG.87080.4	MSTRG.87080	151.951	0	0	-Inf	0.0431602	1	Down	17	1160
ENSBGRG00000010813	-	-	0	22.0135	Inf	Inf	0.0477201	1	Up	4	513		MSTRG.268550.3	MSTRG.268550	204.769	0	0	-Inf	0.043316	1	Down	X	1188
ENSBGRG00000012134	PIGL	phosphatidylinositol glycan anchor biosynthesis class L [Source:HGNC Symbol;Acc:HGNC:8966]	9.95485	67.6895	6.79965	2.76546	0.048027	1	Up	19	759		MSTRG.86088.1	MSTRG.86088	105.204	0	0	-Inf	0.0439366	1	Down	17	835
ENSBGRG00000021903	ROBO4	roundabout guidance receptor 4 [Source:HGNC Symbol;Acc:HGNC:17985]	87.8422	273.257	3.11077	1.63727	0.048056	1	Up	29	4012		MSTRG.264017.30	MSTRG.264017	748.572	36497.2	48.7557	5.6075	0.0440196	1	Up	VBZB01000090.1	1723
ENSBGRG00000006582	L3MBTL2	L3MBTL histone methyl-lysine binding protein 2 [Source:HGNC Symbol;Acc:HGNC:18594]	13.8136	90.7122	6.56688	2.71521	0.0480571	1	Up	5	2763		ENSBGRT00000032587	ENSBGRG00000017776	0	191.16	Inf	Inf	0.0441473	1	Up	11	3860
ENSBGRG00000011874	PEPD	peptidase D [Source:HGNC Symbol;Acc:HGNC:8840]	51.1273	159.596	3.12154	1.64226	0.0483487	1	Up	20	2502		MSTRG.42867.5	MSTRG.42867	237.778	0	0	-Inf	0.0441874	1	Down	12	642
ENSBGRG00000002480	SOX7	SRY-box transcription factor 7 [Source:HGNC Symbol;Acc:HGNC:18196]	0.590575	29.5962	50.1143	5.64715	0.048481	1	Up	7	1991		MSTRG.97925.10	MSTRG.97925	217.286	0	0	-Inf	0.0442026	1	Down	19	1578
ENSBGRG00000003738	CC2D1B	coiled-coil and C2 domain containing 1B [Source:HGNC Symbol;Acc:HGNC:29386]	112.065	274.917	2.45318	1.29465	0.0486613	1	Up	3	3563		MSTRG.247538.2	MSTRG.247538	0.543155	151.974	279.799	8.12825	0.0442062	1	Up	8	1610
ENSBGRG00000004503	LMF2	lipase maturation factor 2 [Source:HGNC Symbol;Acc:HGNC:25096]	57.2567	254.349	4.44225	2.15129	0.048725	1	Up	5	2879		MSTRG.250291.1	MSTRG.250291	0	191.134	Inf	Inf	0.0443379	1	Up	8	369
ENSBGRG00000018410	NR6A1	nuclear receptor subfamily 6 group A member 1 [Source:HGNC Symbol;Acc:HGNC:7985]	57.5806	5.13915	0.0892514	-3.48598	0.048804	1	Down	9	1612		MSTRG.242184.2	MSTRG.242184	104.692	0	0	-Inf	0.0443967	1	Down	8	1227
ENSBGRG00000014062	ABI1	abl interactor 1 [Source:HGNC Symbol;Acc:HGNC:11320]	471.313	219.651	0.46604	-1.10148	0.0488535	1	Down	12	1581		MSTRG.153887.6	MSTRG.153887	194.465	0	0	-Inf	0.0445264	1	Down	25	1796
ENSBGRG00000003335	HECTD3	HECT domain E3 ubiquitin protein ligase 3 [Source:HGNC Symbol;Acc:HGNC:26117]	237.848	494.215	2.07786	1.0551	0.0489597	1	Up	3	3581		MSTRG.132202.15	MSTRG.132202	0	103.393	Inf	Inf	0.0445728	1	Up	22	836
ENSBGRG00000023831	-	retrotransposon Gag like 8C [Source:HGNC Symbol;Acc:HGNC:2569]	23.9828	105.853	4.41371	2.14199	0.0492926	1	Up	X	390		MSTRG.132783.1	MSTRG.132783	105.484	0	0	-Inf	0.0446784	1	Down	22	317
ENSBGRG00000022747	DYRK1B	dual specificity tyrosine phosphorylation regulated kinase 1B [Source:HGNC Symbol;Acc:HGNC:3092]	740.504	1696.99	2.29167	1.1964	0.0493205	1	Up	20	3068		MSTRG.218904.1	MSTRG.218904	0	103.804	Inf	Inf	0.0447725	1	Up	6	397
ENSBGRG00000015317	MCAM	melanoma cell adhesion molecule [Source:HGNC Symbol;Acc:HGNC:6934]	261.193	528.331	2.02276	1.01633	0.0495713	1	Up	13	2950		MSTRG.126580.1	MSTRG.126580	104.896	0	0	-Inf	0.0449775	1	Down	21	404
ENSBGRG00000011900	STX6	syntaxin 6 [Source:HGNC Symbol;Acc:HGNC:11441]	53.1466	159.209	2.99565	1.58287	0.0498088	1	Up	14	2253		MSTRG.270797.1	MSTRG.270797	101.348	0	0	-Inf	0.0449808	1	Down	X	716
													MSTRG.264178.22	MSTRG.264178	0	182.582	Inf	Inf	0.0451569	1	Up	VBZB01000197.1	1146
													MSTRG.63402.6	MSTRG.63402	0	177.909	Inf	Inf	0.0451584	1	Up	14	443
													MSTRG.10743.59	MSTRG.10743	207.905	0	0	-Inf	0.0451762	1	Down	1	2515
													MSTRG.187485.1	MSTRG.187485	101.144	0	0	-Inf	0.0452468	1	Down	3	983
													MSTRG.31905.5	MSTRG.31905	186.574	0	0	-Inf	0.0453509	1	Down	11	4015
													MSTRG.3751.1	MSTRG.3751	0	103.058	Inf	Inf	0.0455092	1	Up	1	728
													MSTRG.215108.2	MSTRG.215108	102.01	0	0	-Inf	0.0455263	1	Down	5	1008
													MSTRG.79462.1	MSTRG.79462	100.648	0	0	-Inf	0.0455857	1	Down	16	594
													MSTRG.94491.2	MSTRG.94491	202.898	0	0	-Inf	0.0456679	1	Down	18	913
													MSTRG.275375.12	MSTRG.275375	0	177.987	Inf	Inf	0.0457272	1	Up	Y	1152
													MSTRG.87667.1	MSTRG.87667	0	101.963	Inf	Inf	0.0457367	1	Up	17	707
													MSTRG.60476.3	MSTRG.60476	0	208.2	Inf	Inf	0.0461884	1	Up	14	1153
													MSTRG.87841.2	MSTRG.87841	0	174.769	Inf	Inf	0.0463359	1	Up	17	1405
													MSTRG.30417.2	MSTRG.30417	0.271577	123.567	454.997	8.82971	0.0465175	1	Up	11	730
													MSTRG.82873.1	MSTRG.82873	0	204.952	Inf	Inf	0.0465477	1	Up	17	973
													MSTRG.83036.23	MSTRG.83036	23.6142	799.943	33.8755	5.08217	0.0466095	1	Up	17	2457
													MSTRG.96617.2	MSTRG.96617	100.152	0	0	-Inf	0.0466639	1	Down	19	1598
													MSTRG.250158.3	MSTRG.250158	101.085	0	0	-Inf	0.046785	1	Down	8	540
													MSTRG.204223.1	MSTRG.204223	100.766	0	0	-Inf	0.0467923	1	Down	5	924
													MSTRG.131842.5	MSTRG.131842	211.469	0	0	-Inf	0.0468218	1	Down	22	781
													MSTRG.124090.2	MSTRG.124090	0	98.0093	Inf	Inf	0.0468224	1	Up	20	3193
													MSTRG.142199.3	MSTRG.142199	100.852	0	0	-Inf	0.0469465	1	Down	23	1526
													MSTRG.49453.1	MSTRG.49453	101.787	0	0	-Inf	0.0469576	1	Down	13	592
													MSTRG.253861.1	MSTRG.253861	0	110.459	Inf	Inf	0.0470479	1	Up	9	494
													MSTRG.231631.1	MSTRG.231631	0	130.382	Inf	Inf	0.0470726	1	Up	7	619
													MSTRG.238657.3	MSTRG.238657	102.584	0	0	-Inf	0.047095	1	Down	8	433
													MSTRG.130238.30	MSTRG.130238	125.145	0.360831	0.00288331	-8.43806	0.0471445	1	Down	21	955
													MSTRG.154461.1	MSTRG.154461	99.811	0	0	-Inf	0.0472521	1	Down	25	1011
													MSTRG.66132.1	MSTRG.66132	171.365	0	0	-Inf	0.0472925	1	Down	15	354
													MSTRG.188676.1	MSTRG.188676	101.767	0	0	-Inf	0.0473472	1	Down	4	1067
													MSTRG.61987.1	MSTRG.61987	2.71577	246.569	90.7914	6.50448	0.047355	1	Up	14	585
													MSTRG.263520.32	MSTRG.263520	100.284	0	0	-Inf	0.0474896	1	Down	9	900
													MSTRG.270849.1	MSTRG.270849	169.736	0	0	-Inf	0.0475158	1	Down	X	1868
													MSTRG.115116.1	MSTRG.115116	101.283	0	0	-Inf	0.0475305	1	Down	2	1133
													MSTRG.176127.1	MSTRG.176127	0	99.4977	Inf	Inf	0.0475411	1	Up	3	931
													MSTRG.85501.1	MSTRG.85501	102.726	0	0	-Inf	0.0475479	1	Down	17	819
													MSTRG.98113.8	MSTRG.98113	0	162.976	Inf	Inf	0.0477537	1	Up	19	989
													MSTRG.155027.1	MSTRG.155027	101.057	0	0	-Inf	0.0480723	1	Down	26	708
													MSTRG.270777.26	MSTRG.270777	0	162.109	Inf	Inf	0.0480827	1	Up	X	5603
													MSTRG.216565.3	MSTRG.216565	0	169.012	Inf	Inf	0.0481981	1	Up	6	2277
													MSTRG.148388.14	MSTRG.148388	101.877	0	0	-Inf	0.0482123	1	Down	24	1421
													MSTRG.30940.1	MSTRG.30940	181.274	0	0	-Inf	0.0483371	1	Down	11	1073
													MSTRG.101646.2	MSTRG.101646	0	97.7834	Inf	Inf	0.0485346	1	Up	19	398
													MSTRG.101795.3	MSTRG.101795	196.15	0	0	-Inf	0.0485923	1	Down	19	1593
													MSTRG.231645.3	MSTRG.231645	0	98.0022	Inf	Inf	0.048669	1	Up	7	909
													MSTRG.171253.1	MSTRG.171253	0	97.5156	Inf	Inf	0.0488198	1	Up	29	305
													MSTRG.214981.1	MSTRG.214981	0	156.551	Inf	Inf	0.048915	1	Up	5	2101
													MSTRG.60018.1	MSTRG.60018	98.025	0	0	-Inf	0.0489858	1	Down	14	1026
													MSTRG.190068.3	MSTRG.190068	176.432	0	0	-Inf	0.0489867	1	Down	4	1798
													MSTRG.198622.1	MSTRG.198622	0	95.8186	Inf	Inf	0.0490035	1	Up	4	530
													MSTRG.31702.1	MSTRG.31702	98.9382	0	0	-Inf	0.0491348	1	Down	11	528
													MSTRG.180603.5	MSTRG.180603	0	154.39	Inf	Inf	0.0492507	1	Up	3	784
													MSTRG.27149.3	MSTRG.27149	98.4197	0	0	-Inf	0.0492897	1	Down	11	724
													MSTRG.183398.20	MSTRG.183398	189.157	0	0	-Inf	0.0494706	1	Down	3	1085
													MSTRG.36324.3	MSTRG.36324	155.071	0	0	-Inf	0.049679	1	Down	11	3676
													MSTRG.49512.1	MSTRG.49512	99.3276	0	0	-Inf	0.0497151	1	Down	13	461
													MSTRG.92381.1	MSTRG.92381	97.4509	0	0	-Inf	0.0497921	1	Down	18	1041
													MSTRG.97127.1	MSTRG.97127	0	97.5034	Inf	Inf	0.0498161	1	Up	19	389

## Sheet: MP vs HP
List of differentially expressed mRNAs(MP vs HP)													List of differentially expressed lncRNAs(MP vs HP)												List of differentially expressed circRNAs(MP vs HP)									List of differentially expressed miRNAs(MP vs HP)
id	Gene_id	Description	baseMean_MP	baseMean_HP	foldChange(HP/MP)	log2FoldChange	pval	padj	Regulation	Chromosome	Length		LncRNA_id	Gene_id	baseMean_MP	baseMean_HP	foldChange(HP/MP)	log2FoldChange	p-val	padj	Regulation	Chromosome	Length		Gene ID	baseMean_MP	baseMean_HP	foldChange(HP/MP)	log2FoldChange	pval	padj	Regulation		id	baseMean	baseMeanA	baseMeanB	foldChange	log2FoldChange	pval	padj	Regulation
ENSBGRG00000014185	-	-	0	124.853	Inf	Inf	8.90283e-05	1	Up	8	1545		MSTRG.264017.20	MSTRG.264017	0	20387.8	Inf	Inf	0.000251874	0.548177	Up	VBZB01000090.1	733		bgrcirc_008677	57.4594	0	0	-Inf	0.00121106	1	Down		bgr-undef-1264	91.6773	46.3427	137.012	2.9565	1.56389	0.0185856	1	Up
ENSBGRG00000018072	HTR4	5-hydroxytryptamine receptor 4 [Source:HGNC Symbol;Acc:HGNC:5299]	75.4974	0	0	-Inf	0.00129525	1	Down	8	5240		MSTRG.3938.4	MSTRG.3938	855.495	0	0	-Inf	0.000317976	0.607201	Down	1	4076		bgrcirc_008042	38.2211	0	0	-Inf	0.0113774	1	Down		bgr-mir-214-2	1.75359	3.50717	0	0	-Inf	0.0478092	1	Down
ENSBGRG00000019265	-	major histocompatibility complex, class II, DQ beta 1 [Source:HGNC Symbol;Acc:HGNC:4944]	156.063	0	0	-Inf	0.00163041	1	Down	24	806		MSTRG.181509.1	MSTRG.181509	0	600.121	Inf	Inf	0.000688792	0.83834	Up	3	213		bgrcirc_002771	0	36.544	Inf	Inf	0.0145317	1	Up		bgr-mir-330-1	8.5393	14.4782	2.6004	0.179608	-2.47708	0.0450776	1	Down
ENSBGRG00000000685	GABBR2	gamma-aminobutyric acid type B receptor subunit 2 [Source:HGNC Symbol;Acc:HGNC:4507]	0	43.1275	Inf	Inf	0.00245353	1	Up	7	2532		MSTRG.168855.1	MSTRG.168855	0	576.051	Inf	Inf	0.000734518	0.860136	Up	28	4262		bgrcirc_009245	0	34.9075	Inf	Inf	0.0178272	1	Up		bgr-undef-1172	9.8876	16.0052	3.77003	0.235551	-2.08589	0.0498133	1	Down
ENSBGRG00000001621	AQP3	aquaporin 3 (Gill blood group) [Source:HGNC Symbol;Acc:HGNC:636]	42.6111	0	0	-Inf	0.00246198	1	Down	7	2261		ENSBGRT00000001657	ENSBGRG00000000908	566.715	0	0	-Inf	0.000773224	0.883226	Down	2	1033		bgrcirc_013567	0	30.6504	Inf	Inf	0.027647	1	Up		bgr-undef-58	16.872	26.3362	7.40772	0.281275	-1.82995	0.0326567	1	Down
ENSBGRG00000022615	SLC15A1	solute carrier family 15 member 1 [Source:HGNC Symbol;Acc:HGNC:10920]	0	41.951	Inf	Inf	0.00313855	1	Up	15	3244		MSTRG.144808.1	MSTRG.144808	0	561.841	Inf	Inf	0.000775674	0.883226	Up	24	1468		bgrcirc_001785	0	30.596	Inf	Inf	0.0284171	1	Up		bgr-undef-67	13.482	24.2362	2.72778	0.11255	-3.15137	0.00178496	1	Down
ENSBGRG00000009542	SCN11A	sodium voltage-gated channel alpha subunit 11 [Source:HGNC Symbol;Acc:HGNC:10583]	40.9842	0	0	-Inf	0.00358808	1	Down	22	7435		MSTRG.189070.13	MSTRG.189070	497.992	0	0	-Inf	0.00107076	1	Down	4	2524		bgrcirc_013748	0	30.4972	Inf	Inf	0.0287396	1	Up
ENSBGRG00000011476	KCNN2	potassium calcium-activated channel subfamily N member 2 [Source:HGNC Symbol;Acc:HGNC:6291]	40.2099	0	0	-Inf	0.00360193	1	Down	11	3063		MSTRG.105821.5	MSTRG.105821	465.024	0	0	-Inf	0.00119368	1	Down	2	1627		bgrcirc_004326	103.681	9.54002	0.0920128	-3.44202	0.0298603	1	Down
ENSBGRG00000008879	MIS18BP1	MIS18 binding protein 1 [Source:HGNC Symbol;Acc:HGNC:20190]	38.2823	0	0	-Inf	0.00486791	1	Down	17	3373		MSTRG.6377.8	MSTRG.6377	0	470.838	Inf	Inf	0.00129942	1	Up	1	3132		bgrcirc_015451	0.397649	36.0044	90.5431	6.50053	0.0298923	1	Up
ENSBGRG00000003388	GPX7	glutathione peroxidase 7 [Source:HGNC Symbol;Acc:HGNC:4559]	82.5515	5.26901	0.0638269	-3.96969	0.00618126	1	Down	3	738		MSTRG.80777.2	MSTRG.80777	444.184	0	0	-Inf	0.00141549	1	Down	17	5045		bgrcirc_017954	0	30.0641	Inf	Inf	0.0300361	1	Up
ENSBGRG00000002144	SOX10	SRY-box transcription factor 10 [Source:HGNC Symbol;Acc:HGNC:11190]	34.5715	0	0	-Inf	0.00712531	1	Down	5	1441		MSTRG.83036.18	MSTRG.83036	0	436.093	Inf	Inf	0.00146833	1	Up	17	2476		bgrcirc_005011	49.9279	212.377	4.25367	2.08871	0.0327638	1	Up
ENSBGRG00000018080	ZNF391	zinc finger protein 391 [Source:HGNC Symbol;Acc:HGNC:18779]	35.6186	0	0	-Inf	0.00712719	1	Down	24	1077		MSTRG.264088.8	MSTRG.264088	424.02	0	0	-Inf	0.00148478	1	Down	VBZB01000113.1	1719		bgrcirc_013306	27.7698	0	0	-Inf	0.0353373	1	Down
ENSBGRG00000017549	TLR2	toll like receptor 2 [Source:HGNC Symbol;Acc:HGNC:11848]	36.3778	0	0	-Inf	0.0071358	1	Down	16	4360		MSTRG.124090.4	MSTRG.124090	0	877.829	Inf	Inf	0.00182602	1	Up	20	3647		bgrcirc_007867	26.9273	0	0	-Inf	0.0395129	1	Down
ENSBGRG00000023448	DCX	doublecortin [Source:HGNC Symbol;Acc:HGNC:2714]	34.0111	0	0	-Inf	0.00751097	1	Down	X	2490		MSTRG.40158.2	MSTRG.40158	0	370.152	Inf	Inf	0.00203331	1	Up	12	825		bgrcirc_014763	0	27.5013	Inf	Inf	0.0411937	1	Up
ENSBGRG00000026084	-	-	34.9618	0	0	-Inf	0.00756238	1	Down	X	717		MSTRG.207631.1	MSTRG.207631	0	414.087	Inf	Inf	0.00230305	1	Up	5	692		bgrcirc_005165	0	27.4371	Inf	Inf	0.0417584	1	Up
ENSBGRG00000012965	SCN3B	sodium voltage-gated channel beta subunit 3 [Source:HGNC Symbol;Acc:HGNC:20665]	196.768	38.9354	0.197875	-2.33734	0.00760203	1	Down	13	1444		MSTRG.252554.1	MSTRG.252554	334.876	0	0	-Inf	0.00266409	1	Down	9	1793		bgrcirc_005253	0	27.2514	Inf	Inf	0.0431403	1	Up
ENSBGRG00000025051	SCAMP5	secretory carrier membrane protein 5 [Source:HGNC Symbol;Acc:HGNC:30386]	0	35.6417	Inf	Inf	0.00772775	1	Up	17	2258		MSTRG.94533.7	MSTRG.94533	0	740.613	Inf	Inf	0.00293967	1	Up	18	2668		bgrcirc_004549	47.1026	2.48368	0.0527292	-4.24525	0.0433521	1	Down
ENSBGRG00000002918	PFDN5	prefoldin subunit 5 [Source:HGNC Symbol;Acc:HGNC:8869]	31.8759	0	0	-Inf	0.0103908	1	Down	5	2395		MSTRG.147721.22	MSTRG.147721	314.701	0	0	-Inf	0.00304462	1	Down	24	1714		bgrcirc_006720	2.08359	48.8399	23.4403	4.55092	0.0457864	1	Up
ENSBGRG00000002183	-	-	36.6931	0	0	-Inf	0.0104429	1	Down	3	258		MSTRG.196150.3	MSTRG.196150	319.747	0	0	-Inf	0.00310473	1	Down	4	2733		bgrcirc_013362	147.87	33.2315	0.224734	-2.15371	0.0470214	1	Down
ENSBGRG00000018282	-	-	0	32.5124	Inf	Inf	0.0105362	1	Up	20	714		MSTRG.246911.2	MSTRG.246911	0	281.679	Inf	Inf	0.00429167	1	Up	8	2529		bgrcirc_015599	0	26.6239	Inf	Inf	0.0491588	1	Up
ENSBGRG00000015158	DPYSL3	dihydropyrimidinase like 3 [Source:HGNC Symbol;Acc:HGNC:3015]	2348.81	1042.56	0.443866	-1.1718	0.0108339	1	Down	8	5615		MSTRG.219192.5	MSTRG.219192	0	267.601	Inf	Inf	0.00447696	1	Up	6	1429
ENSBGRG00000021152	-	-	109.833	17.0861	0.155565	-2.68441	0.0121074	1	Down	14	995		MSTRG.249853.1	MSTRG.249853	0	267.587	Inf	Inf	0.00462611	1	Up	8	855
ENSBGRG00000008693	-	-	0	32.0323	Inf	Inf	0.0127625	1	Up	11	1167		MSTRG.30939.2	MSTRG.30939	267.833	0	0	-Inf	0.00463766	1	Down	11	1202
ENSBGRG00000003965	-	-	0	30.6736	Inf	Inf	0.0129653	1	Up	5	2022		MSTRG.37295.1	MSTRG.37295	0	264.796	Inf	Inf	0.00471295	1	Up	12	1250
ENSBGRG00000004500	RGS1	regulator of G protein signaling 1 [Source:HGNC Symbol;Acc:HGNC:9991]	4.9877	83.3536	16.7118	4.0628	0.013253	1	Up	14	1840		MSTRG.246753.15	MSTRG.246753	0	267.967	Inf	Inf	0.00482088	1	Up	8	2055
ENSBGRG00000001310	GTSE1	G2 and S-phase expressed 1 [Source:HGNC Symbol;Acc:HGNC:13698]	29.8114	0	0	-Inf	0.0136172	1	Down	5	2312		MSTRG.264088.11	MSTRG.264088	243.673	0	0	-Inf	0.00569401	1	Down	VBZB01000113.1	921
ENSBGRG00000020350	SLAIN1	SLAIN motif family member 1 [Source:HGNC Symbol;Acc:HGNC:26387]	0	34.1328	Inf	Inf	0.0146532	1	Up	15	2194		MSTRG.40166.2	MSTRG.40166	0	243.384	Inf	Inf	0.00584825	1	Up	12	968
ENSBGRG00000001080	ELAPOR1	KIAA1324 [Source:HGNC Symbol;Acc:HGNC:29618]	0	31.1372	Inf	Inf	0.0149718	1	Up	3	4410		MSTRG.190157.1	MSTRG.190157	0	239.013	Inf	Inf	0.00616032	1	Up	4	1079
ENSBGRG00000005360	NDUFA4L2	NDUFA4 mitochondrial complex associated like 2 [Source:HGNC Symbol;Acc:HGNC:29836]	0	29.8183	Inf	Inf	0.0154542	1	Up	5	264		MSTRG.69305.1	MSTRG.69305	0	234.867	Inf	Inf	0.0062147	1	Up	15	1522
ENSBGRG00000026708	FTCDNL1	formiminotransferase cyclodeaminase N-terminal like [Source:HGNC Symbol;Acc:HGNC:48661]	0	32.4475	Inf	Inf	0.0171116	1	Up	2	2108		MSTRG.24274.3	MSTRG.24274	231.912	0	0	-Inf	0.00650049	1	Down	10	1817
ENSBGRG00000008094	KLF10	Kruppel like factor 10 [Source:HGNC Symbol;Acc:HGNC:11810]	1386.51	3329.07	2.40104	1.26366	0.0171932	1	Up	18	2163		MSTRG.212036.12	MSTRG.212036	247.101	0	0	-Inf	0.00685525	1	Down	5	3909
ENSBGRG00000013093	FGF7	fibroblast growth factor 7 [Source:HGNC Symbol;Acc:HGNC:3685]	74.9062	8.29595	0.110751	-3.17461	0.0173667	1	Down	11	2869		MSTRG.189133.1	MSTRG.189133	0	227.091	Inf	Inf	0.00685695	1	Up	4	701
ENSBGRG00000005251	TICRR	TOPBP1 interacting checkpoint and replication regulator [Source:HGNC Symbol;Acc:HGNC:28704]	0	29.1164	Inf	Inf	0.0186628	1	Up	17	6375		MSTRG.264081.11	MSTRG.264081	0	8208.9	Inf	Inf	0.00689473	1	Up	VBZB01000110.1	2013
ENSBGRG00000019092	S1PR3	sphingosine-1-phosphate receptor 3 [Source:HGNC Symbol;Acc:HGNC:3167]	28.3454	0	0	-Inf	0.0187897	1	Down	7	1137		MSTRG.45848.2	MSTRG.45848	223.434	0	0	-Inf	0.00704467	1	Down	12	1697
ENSBGRG00000014538	PABPC1L	poly(A) binding protein cytoplasmic 1 like [Source:HGNC Symbol;Acc:HGNC:15797]	0	28.7471	Inf	Inf	0.0199139	1	Up	12	3093		MSTRG.60018.1	MSTRG.60018	226.348	0	0	-Inf	0.0071206	1	Down	14	1026
ENSBGRG00000000523	NR4A1	nuclear receptor subfamily 4 group A member 1 [Source:HGNC Symbol;Acc:HGNC:7980]	329.943	1196.18	3.6254	1.85814	0.0202552	1	Up	5	1867		MSTRG.124088.16	MSTRG.124088	1471.14	0	0	-Inf	0.00719432	1	Down	20	4298
ENSBGRG00000023768	MAF	MAF bZIP transcription factor [Source:HGNC Symbol;Acc:HGNC:6776]	134.711	366.178	2.71826	1.44268	0.0212813	1	Up	20	1605		MSTRG.1486.2	MSTRG.1486	218.786	0	0	-Inf	0.0076646	1	Down	1	2724
ENSBGRG00000023579	TBC1D10A	TBC1 domain family member 10A [Source:HGNC Symbol;Acc:HGNC:23609]	13.9221	88.67	6.36901	2.67107	0.021722	1	Up	16	2434		MSTRG.239182.28	MSTRG.239182	208.387	0	0	-Inf	0.00864966	1	Down	8	1957
ENSBGRG00000009096	FOS	Fos proto-oncogene, AP-1 transcription factor subunit [Source:HGNC Symbol;Acc:HGNC:3796]	121.085	861.463	7.11452	2.83077	0.0222632	1	Up	11	1862		MSTRG.185431.1	MSTRG.185431	0	207.504	Inf	Inf	0.00870538	1	Up	3	1027
ENSBGRG00000024245	CENPQ	centromere protein Q [Source:HGNC Symbol;Acc:HGNC:21347]	26.7825	0	0	-Inf	0.0225796	1	Down	24	783		MSTRG.169104.24	MSTRG.169104	209.413	0	0	-Inf	0.00872909	1	Down	28	1007
ENSBGRG00000015786	CXCL10	C-X-C motif chemokine ligand 10 [Source:HGNC Symbol;Acc:HGNC:10637]	28.3963	0	0	-Inf	0.0233685	1	Down	6	1580		MSTRG.248626.1	MSTRG.248626	203.619	0	0	-Inf	0.00893022	1	Down	8	1763
ENSBGRG00000024152	HYAL1	hyaluronidase 1 [Source:HGNC Symbol;Acc:HGNC:5320]	0	25.8733	Inf	Inf	0.0248111	1	Up	22	1962		MSTRG.108245.2	MSTRG.108245	203.606	0	0	-Inf	0.00902801	1	Down	2	1465
ENSBGRG00000006266	S100A14	S100 calcium binding protein A14 [Source:HGNC Symbol;Acc:HGNC:18901]	16.3954	122.802	7.49001	2.90497	0.024942	1	Up	3	315		MSTRG.264083.2	MSTRG.264083	4798.7	0	0	-Inf	0.00907383	1	Down	VBZB01000110.1	2126
ENSBGRG00000005144	MOCS3	molybdenum cofactor synthesis 3 [Source:HGNC Symbol;Acc:HGNC:15765]	12.3597	87.6806	7.09405	2.82661	0.024946	1	Up	12	1386		MSTRG.276925.35	MSTRG.276925	205.262	0	0	-Inf	0.00921103	1	Down	Y	221
ENSBGRG00000013387	-	-	41.4419	1.91838	0.0462908	-4.43313	0.0269317	1	Down	3	1938		MSTRG.1486.1	MSTRG.1486	0	195.953	Inf	Inf	0.00986013	1	Up	1	2258
ENSBGRG00000006339	ARRDC4	arrestin domain containing 4 [Source:HGNC Symbol;Acc:HGNC:28087]	177.81	467.901	2.63147	1.39587	0.0272821	1	Up	17	1242		MSTRG.264017.6	MSTRG.264017	1290.73	13.4787	0.0104427	-6.58136	0.0103174	1	Down	VBZB01000090.1	1604
ENSBGRG00000000772	COMP	cartilage oligomeric matrix protein [Source:HGNC Symbol;Acc:HGNC:2227]	0	551.852	Inf	Inf	0.0272877	1	Up	8	2271		MSTRG.32594.10	MSTRG.32594	194.276	0	0	-Inf	0.010482	1	Down	11	849
ENSBGRG00000022310	-	-	12.8424	147.481	11.4839	3.52155	0.0290594	1	Up	13	960		MSTRG.22264.3	MSTRG.22264	187.073	0	0	-Inf	0.0108752	1	Down	10	844
ENSBGRG00000012849	SLC45A3	solute carrier family 45 member 3 [Source:HGNC Symbol;Acc:HGNC:8642]	0	25.0608	Inf	Inf	0.0304994	1	Up	14	2557		MSTRG.10756.3	MSTRG.10756	0	190.9	Inf	Inf	0.0113047	1	Up	1	1396
ENSBGRG00000003810	-	-	100.561	14.3775	0.142973	-2.80619	0.0310901	1	Down	18	2936		MSTRG.180677.1	MSTRG.180677	185.318	0	0	-Inf	0.0114586	1	Down	3	1408
ENSBGRG00000010987	ANGPTL7	angiopoietin like 7 [Source:HGNC Symbol;Acc:HGNC:24078]	0	357.462	Inf	Inf	0.0336287	1	Up	14	1035		MSTRG.44039.2	MSTRG.44039	27.1586	2220.71	81.7682	6.35347	0.0115017	1	Up	12	3268
ENSBGRG00000026122	SLIT1	slit guidance ligand 1 [Source:HGNC Symbol;Acc:HGNC:11085]	0	24.9244	Inf	Inf	0.0343145	1	Up	25	4602		MSTRG.71415.4	MSTRG.71415	183.996	0	0	-Inf	0.01155	1	Down	15	562
ENSBGRG00000025321	MYO1F	myosin IF [Source:HGNC Symbol;Acc:HGNC:7600]	70.0744	218.598	3.11951	1.64132	0.0348307	1	Up	8	3294		MSTRG.41302.17	MSTRG.41302	180.874	0	0	-Inf	0.0124403	1	Down	12	2011
ENSBGRG00000017364	-	-	76.5774	13.0278	0.170126	-2.55533	0.0360263	1	Down	27	240		MSTRG.39908.2	MSTRG.39908	0	177.68	Inf	Inf	0.0125221	1	Up	12	2370
ENSBGRG00000023632	-	-	24.4055	0	0	-Inf	0.0368174	1	Down	15	3911		MSTRG.154211.2	MSTRG.154211	0	175.482	Inf	Inf	0.012605	1	Up	25	1197
ENSBGRG00000003116	IRF1	interferon regulatory factor 1 [Source:HGNC Symbol;Acc:HGNC:6116]	197.074	542.071	2.75059	1.45974	0.0368424	1	Up	8	2409		MSTRG.174641.15	MSTRG.174641	294.512	0.897227	0.00304648	-8.35864	0.0130509	1	Down	3	2027
ENSBGRG00000002689	RGS4	regulator of G protein signaling 4 [Source:HGNC Symbol;Acc:HGNC:10000]	23.6392	0	0	-Inf	0.0370137	1	Down	3	3131		MSTRG.150397.2	MSTRG.150397	0	174.92	Inf	Inf	0.0131067	1	Up	25	986
ENSBGRG00000026658	PIK3R5	phosphoinositide-3-kinase regulatory subunit 5 [Source:HGNC Symbol;Acc:HGNC:30035]	4.2369	48.6095	11.4729	3.52016	0.0384637	1	Up	19	2891		MSTRG.125711.2	MSTRG.125711	171.352	0	0	-Inf	0.0134235	1	Down	21	1918
ENSBGRG00000007032	IYD	iodotyrosine deiodinase [Source:HGNC Symbol;Acc:HGNC:21071]	7.71719	78.8711	10.2202	3.35335	0.0388757	1	Up	10	1335		MSTRG.12080.1	MSTRG.12080	172.178	0	0	-Inf	0.0135105	1	Down	1	777
ENSBGRG00000020910	COMTD1	catechol-O-methyltransferase domain containing 1 [Source:HGNC Symbol;Acc:HGNC:26309]	27.7467	0.338196	0.0121887	-6.35831	0.0402874	1	Down	27	900		MSTRG.71804.1	MSTRG.71804	0	165.98	Inf	Inf	0.0145104	1	Up	15	335
ENSBGRG00000022164	FOSB	FosB proto-oncogene, AP-1 transcription factor subunit [Source:HGNC Symbol;Acc:HGNC:3797]	5.5416	60.5829	10.9324	3.45054	0.0407941	1	Up	20	3923		MSTRG.242184.2	MSTRG.242184	159.399	0	0	-Inf	0.016622	1	Down	8	1227
ENSBGRG00000013318	ROGDI	rogdi atypical leucine zipper [Source:HGNC Symbol;Acc:HGNC:29478]	27.3594	120.148	4.39148	2.13471	0.0411566	1	Up	26	1921		MSTRG.214058.1	MSTRG.214058	158.397	0	0	-Inf	0.0166294	1	Down	5	1161
ENSBGRG00000002408	FRZB	frizzled related protein [Source:HGNC Symbol;Acc:HGNC:3959]	472.208	200.011	0.423565	-1.23934	0.0413327	1	Down	2	1339		MSTRG.103474.3	MSTRG.103474	0	156.173	Inf	Inf	0.0166976	1	Up	19	1058
ENSBGRG00000015380	CD19	CD19 molecule [Source:HGNC Symbol;Acc:HGNC:1633]	0	22.7899	Inf	Inf	0.0414204	1	Up	26	1912		MSTRG.91083.17	MSTRG.91083	358.108	0	0	-Inf	0.0168005	1	Down	18	2556
ENSBGRG00000025198	METTL21C	methyltransferase like 21C [Source:HGNC Symbol;Acc:HGNC:33717]	601.476	187.299	0.311399	-1.68316	0.041626	1	Down	15	774		MSTRG.92042.7	MSTRG.92042	157.004	0	0	-Inf	0.0169453	1	Down	18	532
ENSBGRG00000017135	PLEKHO1	pleckstrin homology domain containing O1 [Source:HGNC Symbol;Acc:HGNC:24310]	186.676	435.484	2.33284	1.22209	0.0418747	1	Up	3	1230		MSTRG.175841.1	MSTRG.175841	0	155.733	Inf	Inf	0.0170548	1	Up	3	655
ENSBGRG00000003222	THPO	thrombopoietin [Source:HGNC Symbol;Acc:HGNC:11795]	0	22.1531	Inf	Inf	0.0424139	1	Up	1	1062		MSTRG.239668.1	MSTRG.239668	153.731	0	0	-Inf	0.0174008	1	Down	8	743
ENSBGRG00000025182	-	-	193.478	67.3815	0.348265	-1.52174	0.0426138	1	Down	8	225		MSTRG.174641.19	MSTRG.174641	197.378	0.300725	0.0015236	-9.3583	0.0177278	1	Down	3	1500
ENSBGRG00000011326	SPAG17	sperm associated antigen 17 [Source:HGNC Symbol;Acc:HGNC:26620]	105.442	23.7874	0.225597	-2.14818	0.0430567	1	Down	3	6657		MSTRG.264017.17	MSTRG.264017	12.7107	9297.75	731.487	9.51469	0.0181525	1	Up	VBZB01000090.1	2049
ENSBGRG00000023470	ENOPH1	enolase-phosphatase 1 [Source:HGNC Symbol;Acc:HGNC:24599]	198.881	61.8727	0.311104	-1.68453	0.043163	1	Down	6	2223		MSTRG.30510.27	MSTRG.30510	0	152.213	Inf	Inf	0.0182716	1	Up	11	1456
ENSBGRG00000007015	RPS6KA1	ribosomal protein S6 kinase A1 [Source:HGNC Symbol;Acc:HGNC:10430]	45.6333	151.444	3.31873	1.73063	0.0432375	1	Up	2	3711		MSTRG.8579.1	MSTRG.8579	152.134	0	0	-Inf	0.0185283	1	Down	1	928
ENSBGRG00000007196	-	-	0	23.4637	Inf	Inf	0.0433497	1	Up	8	2036		MSTRG.261085.1	MSTRG.261085	152.124	0	0	-Inf	0.0185304	1	Down	9	1268
ENSBGRG00000006084	IFNLR1	interferon lambda receptor 1 [Source:HGNC Symbol;Acc:HGNC:18584]	22.966	0	0	-Inf	0.043996	1	Down	2	2392		MSTRG.16441.1	MSTRG.16441	151.392	0	0	-Inf	0.0185424	1	Down	10	1026
ENSBGRG00000002908	TIMELESS	timeless circadian regulator [Source:HGNC Symbol;Acc:HGNC:11813]	42.8223	149.867	3.49974	1.80725	0.044323	1	Up	5	3670		MSTRG.75023.2	MSTRG.75023	0	150.049	Inf	Inf	0.0186299	1	Up	16	1029
ENSBGRG00000020868	HTR2A	5-hydroxytryptamine receptor 2A [Source:HGNC Symbol;Acc:HGNC:5293]	23.2761	0	0	-Inf	0.0446523	1	Down	15	2318		MSTRG.146433.2	MSTRG.146433	178.315	0	0	-Inf	0.0189573	1	Down	24	1637
ENSBGRG00000021293	RGS10	regulator of G protein signaling 10 [Source:HGNC Symbol;Acc:HGNC:9992]	0	22.3808	Inf	Inf	0.0454699	1	Up	25	851		MSTRG.221923.2	MSTRG.221923	148.707	0	0	-Inf	0.019377	1	Down	6	749
ENSBGRG00000017845	TSSK4	testis specific serine kinase 4 [Source:HGNC Symbol;Acc:HGNC:19825]	21.8762	0	0	-Inf	0.0455959	1	Down	11	981		MSTRG.37750.3	MSTRG.37750	146.355	0	0	-Inf	0.0197774	1	Down	12	878
ENSBGRG00000002063	HSPB7	heat shock protein family B (small) member 7 [Source:HGNC Symbol;Acc:HGNC:5249]	763.189	375.736	0.492323	-1.02232	0.0461235	1	Down	2	1282		MSTRG.167917.27	MSTRG.167917	1.20705	265.912	220.299	7.78332	0.0201805	1	Up	28	1817
ENSBGRG00000009709	-	-	0	21.6842	Inf	Inf	0.0462235	1	Up	9	2459		MSTRG.190068.1	MSTRG.190068	955.984	0	0	-Inf	0.0202237	1	Down	4	3005
ENSBGRG00000019550	SCN3A	sodium voltage-gated channel alpha subunit 3 [Source:HGNC Symbol;Acc:HGNC:10590]	7.04897	62.3141	8.84018	3.14408	0.0463329	1	Up	2	6994		MSTRG.147721.10	MSTRG.147721	0	148.041	Inf	Inf	0.0202355	1	Up	24	1649
ENSBGRG00000010980	MILR1	mast cell immunoglobulin like receptor 1 [Source:HGNC Symbol;Acc:HGNC:27570]	2.6853	45.512	16.9485	4.08309	0.047035	1	Up	19	945		MSTRG.231482.1	MSTRG.231482	144.072	0	0	-Inf	0.0202693	1	Down	7	597
ENSBGRG00000022588	-	-	36.4373	1.97523	0.0542088	-4.20533	0.0480612	1	Down	X	138		MSTRG.51785.2	MSTRG.51785	0	932.331	Inf	Inf	0.0203112	1	Up	13	6506
ENSBGRG00000022497	SLA	Src like adaptor [Source:HGNC Symbol;Acc:HGNC:10902]	30.0095	112.645	3.75364	1.90829	0.0487219	1	Up	18	2196		MSTRG.20385.11	MSTRG.20385	143.123	0	0	-Inf	0.0209422	1	Down	10	837
ENSBGRG00000021905	GXYLT2	glucoside xylosyltransferase 2 [Source:HGNC Symbol;Acc:HGNC:33383]	110.077	30.6995	0.278892	-1.84222	0.04963	1	Down	22	2418		MSTRG.124088.15	MSTRG.124088	0	866.418	Inf	Inf	0.0210665	1	Up	20	4376
													MSTRG.169825.1	MSTRG.169825	143.292	0	0	-Inf	0.021183	1	Down	28	859
													MSTRG.214256.3	MSTRG.214256	140.852	0	0	-Inf	0.0217562	1	Down	5	778
													MSTRG.68243.41	MSTRG.68243	228.375	0.902176	0.00395041	-7.98378	0.0217715	1	Down	15	1367
													MSTRG.135989.1	MSTRG.135989	0	142.754	Inf	Inf	0.0219087	1	Up	22	2772
													MSTRG.91082.2	MSTRG.91082	137.817	0	0	-Inf	0.0224515	1	Down	18	1619
													MSTRG.130009.1	MSTRG.130009	138.099	0	0	-Inf	0.0225743	1	Down	21	776
													MSTRG.6377.2	MSTRG.6377	138.713	0	0	-Inf	0.0230298	1	Down	1	2022
													MSTRG.156427.1	MSTRG.156427	135.7	0	0	-Inf	0.0235125	1	Down	26	780
													MSTRG.131842.5	MSTRG.131842	137.074	0	0	-Inf	0.0235643	1	Down	22	781
													MSTRG.3906.8	MSTRG.3906	0	690.152	Inf	Inf	0.023592	1	Up	1	5243
													MSTRG.136354.3	MSTRG.136354	0	138.208	Inf	Inf	0.0236074	1	Up	22	623
													MSTRG.163814.3	MSTRG.163814	0	134.326	Inf	Inf	0.0239143	1	Up	27	1253
													MSTRG.88347.1	MSTRG.88347	0	137.147	Inf	Inf	0.0239809	1	Up	17	764
													MSTRG.125742.2	MSTRG.125742	133.77	0	0	-Inf	0.0241085	1	Down	21	691
													MSTRG.147722.2	MSTRG.147722	132.952	0	0	-Inf	0.0244253	1	Down	24	612
													MSTRG.52256.3	MSTRG.52256	133.144	0	0	-Inf	0.0246253	1	Down	13	1409
													MSTRG.147141.19	MSTRG.147141	132.962	0	0	-Inf	0.0246433	1	Down	24	924
													MSTRG.170580.4	MSTRG.170580	12384.4	323.635	0.0261325	-5.25801	0.0250458	1	Down	29	1087
													MSTRG.264088.17	MSTRG.264088	131.14	0	0	-Inf	0.025245	1	Down	VBZB01000113.1	657
													MSTRG.30502.8	MSTRG.30502	0	269.703	Inf	Inf	0.0252904	1	Up	11	1949
													MSTRG.80783.2	MSTRG.80783	132.761	0	0	-Inf	0.0253596	1	Down	17	1667
													MSTRG.238342.10	MSTRG.238342	0	129.886	Inf	Inf	0.0255392	1	Up	8	399
													MSTRG.230680.3	MSTRG.230680	129.885	0	0	-Inf	0.0257235	1	Down	7	1928
													MSTRG.163310.23	MSTRG.163310	24.7445	1164.6	47.0651	5.55659	0.0257719	1	Up	27	3942
													MSTRG.108903.6	MSTRG.108903	0	129.296	Inf	Inf	0.0258464	1	Up	2	816
													MSTRG.3907.2	MSTRG.3907	130.642	0	0	-Inf	0.0258715	1	Down	1	1839
													MSTRG.119905.1	MSTRG.119905	131.92	0	0	-Inf	0.025908	1	Down	20	794
													MSTRG.227357.1	MSTRG.227357	0	130.819	Inf	Inf	0.0259801	1	Up	7	902
													MSTRG.82372.2	MSTRG.82372	572.142	0	0	-Inf	0.0261041	1	Down	17	5903
													MSTRG.24272.2	MSTRG.24272	1.99203	275.209	138.155	7.11014	0.0262658	1	Up	10	896
													MSTRG.220969.1	MSTRG.220969	230.268	1.193	0.00518093	-7.59257	0.026346	1	Down	6	1554
													MSTRG.148417.1	MSTRG.148417	0	129.075	Inf	Inf	0.0265148	1	Up	24	643
													MSTRG.268727.1	MSTRG.268727	0	125.568	Inf	Inf	0.0276105	1	Up	X	831
													MSTRG.84408.9	MSTRG.84408	126.48	0	0	-Inf	0.027656	1	Down	17	1047
													MSTRG.37892.1	MSTRG.37892	0	126.701	Inf	Inf	0.0277141	1	Up	12	347
													MSTRG.79022.3	MSTRG.79022	0	129.389	Inf	Inf	0.0277411	1	Up	16	602
													MSTRG.186743.2	MSTRG.186743	126.533	0	0	-Inf	0.0277666	1	Down	3	803
													MSTRG.215365.4	MSTRG.215365	289.409	2.4058	0.00831282	-6.91045	0.0278419	1	Down	6	567
													MSTRG.61962.1	MSTRG.61962	0	127.35	Inf	Inf	0.0280133	1	Up	14	580
													MSTRG.24708.1	MSTRG.24708	126.323	0	0	-Inf	0.0284225	1	Down	10	826
													MSTRG.51343.8	MSTRG.51343	202.616	0.894752	0.00441601	-7.82304	0.0284245	1	Down	13	2095
													MSTRG.261072.1	MSTRG.261072	124.35	0	0	-Inf	0.0286978	1	Down	9	798
													MSTRG.123463.1	MSTRG.123463	0	125.621	Inf	Inf	0.0289189	1	Up	20	476
													MSTRG.201762.6	MSTRG.201762	198.063	0.894752	0.00451752	-7.79025	0.0292939	1	Down	5	1541
													MSTRG.37896.2	MSTRG.37896	124.844	0	0	-Inf	0.0292988	1	Down	12	1283
													MSTRG.54762.8	MSTRG.54762	446.187	0	0	-Inf	0.0295918	1	Down	13	3263
													MSTRG.65085.24	MSTRG.65085	0	125.163	Inf	Inf	0.0296218	1	Up	14	389
													MSTRG.139473.1	MSTRG.139473	122.153	0	0	-Inf	0.0296335	1	Down	22	876
													MSTRG.12699.2	MSTRG.12699	121.514	0	0	-Inf	0.0302163	1	Down	1	687
													MSTRG.85264.2	MSTRG.85264	289.862	3.03272	0.0104626	-6.57861	0.0304752	1	Down	17	3293
													MSTRG.127754.1	MSTRG.127754	176.445	0.673937	0.00381953	-8.03239	0.030583	1	Down	21	719
													MSTRG.30428.1	MSTRG.30428	119.399	0	0	-Inf	0.0311372	1	Down	11	611
													MSTRG.37465.1	MSTRG.37465	0	120.45	Inf	Inf	0.0311517	1	Up	12	345
													MSTRG.238351.3	MSTRG.238351	0	120.211	Inf	Inf	0.0313525	1	Up	8	730
													MSTRG.111686.1	MSTRG.111686	0	120.49	Inf	Inf	0.0314906	1	Up	2	608
													MSTRG.125703.1	MSTRG.125703	0	120.15	Inf	Inf	0.0315313	1	Up	21	607
													MSTRG.121097.13	MSTRG.121097	330.434	0	0	-Inf	0.0315532	1	Down	20	4128
													MSTRG.212100.4	MSTRG.212100	121.074	0	0	-Inf	0.0316558	1	Down	5	536
													MSTRG.26838.1	MSTRG.26838	0.301763	168.918	559.77	9.12869	0.0316849	1	Up	11	570
													MSTRG.69787.3	MSTRG.69787	120.328	0	0	-Inf	0.0317057	1	Down	15	1193
													MSTRG.143363.4	MSTRG.143363	119.965	0	0	-Inf	0.0319121	1	Down	23	851
													MSTRG.24136.1	MSTRG.24136	118.815	0	0	-Inf	0.0323029	1	Down	10	985
													MSTRG.101329.1	MSTRG.101329	117.179	0	0	-Inf	0.0325043	1	Down	19	1159
													MSTRG.266562.1	MSTRG.266562	0	116.772	Inf	Inf	0.0325475	1	Up	X	694
													MSTRG.233364.5	MSTRG.233364	117.306	0	0	-Inf	0.0326553	1	Down	7	1091
													MSTRG.188971.6	MSTRG.188971	400.73	0	0	-Inf	0.0326786	1	Down	4	5488
													MSTRG.8523.10	MSTRG.8523	0	117.875	Inf	Inf	0.0327825	1	Up	1	497
													MSTRG.29674.1	MSTRG.29674	0	116.091	Inf	Inf	0.0329603	1	Up	11	592
													MSTRG.38912.1	MSTRG.38912	116.718	0	0	-Inf	0.0330262	1	Down	12	347
													MSTRG.242136.1	MSTRG.242136	116.76	0	0	-Inf	0.0333838	1	Down	8	2103
													MSTRG.161485.1	MSTRG.161485	0	116.71	Inf	Inf	0.0334189	1	Up	27	397
													MSTRG.268918.2	MSTRG.268918	0	337.62	Inf	Inf	0.0336619	1	Up	X	2093
													MSTRG.264387.5	MSTRG.264387	117.069	0	0	-Inf	0.0337989	1	Down	X	2999
													MSTRG.36521.1	MSTRG.36521	0	115.489	Inf	Inf	0.0338242	1	Up	11	544
													MSTRG.185897.1	MSTRG.185897	0	114.414	Inf	Inf	0.0340114	1	Up	3	978
													MSTRG.119508.1	MSTRG.119508	0	116.691	Inf	Inf	0.0340421	1	Up	20	1282
													MSTRG.130257.1	MSTRG.130257	116.189	0	0	-Inf	0.0340942	1	Down	21	696
													MSTRG.185894.5	MSTRG.185894	122.987	0	0	-Inf	0.0343692	1	Down	3	2653
													MSTRG.132263.14	MSTRG.132263	0	361.904	Inf	Inf	0.0345582	1	Up	22	1503
													MSTRG.87060.16	MSTRG.87060	0	113.227	Inf	Inf	0.0348632	1	Up	17	1273
													MSTRG.165482.1	MSTRG.165482	0.332005	144.512	435.27	8.76577	0.0350072	1	Up	27	453
													MSTRG.6404.1	MSTRG.6404	114.835	0	0	-Inf	0.0352073	1	Down	1	658
													MSTRG.2702.3	MSTRG.2702	272.514	2.70653	0.00993171	-6.65374	0.0352581	1	Down	1	1507
													MSTRG.146778.6	MSTRG.146778	0	310.048	Inf	Inf	0.0352609	1	Up	24	4771
													MSTRG.247788.1	MSTRG.247788	0	112.752	Inf	Inf	0.0357271	1	Up	8	816
													MSTRG.114295.1	MSTRG.114295	112.551	0	0	-Inf	0.0358138	1	Down	2	693
													MSTRG.2719.10	MSTRG.2719	331.009	0	0	-Inf	0.0359296	1	Down	1	5442
													MSTRG.178835.1	MSTRG.178835	112.256	0	0	-Inf	0.0360231	1	Down	3	460
													MSTRG.264178.24	MSTRG.264178	0	292.286	Inf	Inf	0.0361595	1	Up	VBZB01000197.1	1100
													MSTRG.34416.1	MSTRG.34416	0	113.115	Inf	Inf	0.0363832	1	Up	11	962
													MSTRG.225968.2	MSTRG.225968	0	110.999	Inf	Inf	0.0364003	1	Up	6	586
													MSTRG.65371.1	MSTRG.65371	0	112.644	Inf	Inf	0.0365635	1	Up	14	442
													MSTRG.135820.2	MSTRG.135820	111.632	0	0	-Inf	0.036585	1	Down	22	1011
													MSTRG.64386.1	MSTRG.64386	0	111.044	Inf	Inf	0.0366115	1	Up	14	786
													MSTRG.17206.4	MSTRG.17206	129.838	0	0	-Inf	0.0367708	1	Down	10	1143
													MSTRG.20662.1	MSTRG.20662	111.146	0	0	-Inf	0.0368403	1	Down	10	936
													MSTRG.235029.2	MSTRG.235029	111.849	0	0	-Inf	0.0371507	1	Down	7	2396
													MSTRG.41452.3	MSTRG.41452	110.216	0	0	-Inf	0.0371554	1	Down	12	2867
													MSTRG.5706.1	MSTRG.5706	110.958	0	0	-Inf	0.0371853	1	Down	1	357
													MSTRG.232700.1	MSTRG.232700	111.62	0	0	-Inf	0.037723	1	Down	7	876
													MSTRG.172224.2	MSTRG.172224	110.673	0	0	-Inf	0.0377784	1	Down	29	2661
													MSTRG.52451.1	MSTRG.52451	0	110.517	Inf	Inf	0.0379438	1	Up	13	715
													MSTRG.230680.4	MSTRG.230680	7.3041	388.536	53.1942	5.7332	0.0380115	1	Up	7	4161
													ENSBGRT00000043431	ENSBGRG00000023534	0	109.634	Inf	Inf	0.0380463	1	Up	19	5266
													MSTRG.226611.13	MSTRG.226611	0	297.206	Inf	Inf	0.0381084	1	Up	7	5633
													MSTRG.264165.9	MSTRG.264165	203.35	1.49125	0.00733344	-7.09129	0.0384288	1	Down	VBZB01000171.1	857
													MSTRG.259811.13	MSTRG.259811	0.301763	139.427	462.042	8.85188	0.0385538	1	Up	9	499
													MSTRG.4823.5	MSTRG.4823	0	255.899	Inf	Inf	0.0386246	1	Up	1	4022
													MSTRG.163310.14	MSTRG.163310	0	252.309	Inf	Inf	0.0390565	1	Up	27	743
													MSTRG.134765.4	MSTRG.134765	107.642	0	0	-Inf	0.0391533	1	Down	22	1607
													MSTRG.240986.1	MSTRG.240986	108.104	0	0	-Inf	0.0393433	1	Down	8	531
													MSTRG.9641.2	MSTRG.9641	0	107.006	Inf	Inf	0.0394801	1	Up	1	716
													MSTRG.62293.2	MSTRG.62293	107.47	0	0	-Inf	0.0397783	1	Down	14	1182
													MSTRG.240998.1	MSTRG.240998	108.569	0	0	-Inf	0.0399594	1	Down	8	551
													MSTRG.238063.2	MSTRG.238063	106.808	0	0	-Inf	0.0399687	1	Down	7	980
													MSTRG.48654.1	MSTRG.48654	0	106.333	Inf	Inf	0.0400093	1	Up	13	475
													MSTRG.97925.5	MSTRG.97925	0	268.227	Inf	Inf	0.0400985	1	Up	19	2363
													MSTRG.177006.1	MSTRG.177006	106.524	0	0	-Inf	0.0402044	1	Down	3	1520
													MSTRG.53634.1	MSTRG.53634	107.619	0	0	-Inf	0.0402351	1	Down	13	857
													MSTRG.142264.1	MSTRG.142264	0	105.807	Inf	Inf	0.0403921	1	Up	23	403
													MSTRG.186863.8	MSTRG.186863	106.557	0	0	-Inf	0.0404546	1	Down	3	1220
													MSTRG.117721.1	MSTRG.117721	133.194	0.300725	0.0022578	-8.79086	0.0406977	1	Down	20	1190
													MSTRG.126195.3	MSTRG.126195	232.635	0	0	-Inf	0.0408718	1	Down	21	1201
													MSTRG.105674.3	MSTRG.105674	107.236	0	0	-Inf	0.0408851	1	Down	2	1249
													MSTRG.174535.9	MSTRG.174535	0.30291	134.371	443.601	8.79312	0.0409642	1	Up	3	1462
													MSTRG.243312.4	MSTRG.243312	106.593	0	0	-Inf	0.0409879	1	Down	8	1361
													MSTRG.78337.1	MSTRG.78337	0	106.767	Inf	Inf	0.0410433	1	Up	16	556
													MSTRG.42867.5	MSTRG.42867	252.988	0	0	-Inf	0.0410506	1	Down	12	642
													MSTRG.23146.1	MSTRG.23146	230.212	0	0	-Inf	0.0410843	1	Down	10	3659
													MSTRG.32717.1	MSTRG.32717	0.664009	150.211	226.217	7.82157	0.0412449	1	Up	11	597
													MSTRG.212929.1	MSTRG.212929	0	104.844	Inf	Inf	0.0412525	1	Up	5	608
													MSTRG.14755.3	MSTRG.14755	0	104.733	Inf	Inf	0.0413222	1	Up	1	757
													MSTRG.6378.17	MSTRG.6378	227.485	0	0	-Inf	0.0413273	1	Down	1	2909
													MSTRG.34395.3	MSTRG.34395	0.332005	131.138	394.987	8.62566	0.0414436	1	Up	11	5386
													MSTRG.250775.2	MSTRG.250775	104.955	0	0	-Inf	0.0415042	1	Down	8	1241
													MSTRG.169206.1	MSTRG.169206	105.239	0	0	-Inf	0.041678	1	Down	28	324
													MSTRG.263503.1	MSTRG.263503	106.478	0	0	-Inf	0.0417811	1	Down	9	714
													MSTRG.249148.2	MSTRG.249148	0	246.324	Inf	Inf	0.0418289	1	Up	8	2650
													MSTRG.189312.1	MSTRG.189312	105.75	0	0	-Inf	0.0420831	1	Down	4	608
													MSTRG.256370.1	MSTRG.256370	104.562	0	0	-Inf	0.0422471	1	Down	9	1087
													MSTRG.56712.1	MSTRG.56712	105.447	0	0	-Inf	0.042347	1	Down	14	1321
													MSTRG.276615.1	MSTRG.276615	0	104.305	Inf	Inf	0.0424331	1	Up	Y	437
													MSTRG.33787.5	MSTRG.33787	0	238.911	Inf	Inf	0.0424675	1	Up	11	551
													MSTRG.51284.5	MSTRG.51284	214.46	0	0	-Inf	0.0425511	1	Down	13	1855
													MSTRG.111678.4	MSTRG.111678	104.071	0	0	-Inf	0.0425606	1	Down	2	1882
													MSTRG.28386.2	MSTRG.28386	0	104.48	Inf	Inf	0.0426852	1	Up	11	1053
													MSTRG.229944.13	MSTRG.229944	233.399	0	0	-Inf	0.0427222	1	Down	7	2673
													MSTRG.55596.1	MSTRG.55596	0	104.774	Inf	Inf	0.0427936	1	Up	13	926
													MSTRG.95086.3	MSTRG.95086	0	103.084	Inf	Inf	0.0427951	1	Up	18	500
													MSTRG.205445.1	MSTRG.205445	103.659	0	0	-Inf	0.0428272	1	Down	5	433
													MSTRG.239138.7	MSTRG.239138	0.664009	177.302	267.017	8.06079	0.0430272	1	Up	8	830
													MSTRG.102554.1	MSTRG.102554	0	103.251	Inf	Inf	0.0432631	1	Up	19	530
													MSTRG.102970.24	MSTRG.102970	0	114.109	Inf	Inf	0.0432952	1	Up	19	348
													MSTRG.3906.17	MSTRG.3906	0	203.892	Inf	Inf	0.043406	1	Up	1	2116
													MSTRG.85199.2	MSTRG.85199	0	203.591	Inf	Inf	0.0434378	1	Up	17	1706
													MSTRG.185911.9	MSTRG.185911	253.823	3.22471	0.0127046	-6.29851	0.0434593	1	Down	3	1154
													MSTRG.125658.4	MSTRG.125658	223.771	0	0	-Inf	0.0436226	1	Down	21	2292
													MSTRG.109430.17	MSTRG.109430	0	201.787	Inf	Inf	0.0436297	1	Up	2	1431
													MSTRG.157201.2	MSTRG.157201	148.779	0	0	-Inf	0.0436462	1	Down	26	2371
													MSTRG.276925.7	MSTRG.276925	0	194.305	Inf	Inf	0.043805	1	Up	Y	226
													MSTRG.264017.4	MSTRG.264017	2.98804	2762.47	924.507	9.85254	0.0438775	1	Up	VBZB01000090.1	1834
													MSTRG.128956.1	MSTRG.128956	104.095	0	0	-Inf	0.0439836	1	Down	21	830
													MSTRG.175832.1	MSTRG.175832	102.021	0	0	-Inf	0.0439868	1	Down	3	355
													MSTRG.172206.2	MSTRG.172206	103.258	0	0	-Inf	0.0439891	1	Down	29	655
													MSTRG.42188.7	MSTRG.42188	0	103.587	Inf	Inf	0.0441825	1	Up	12	910
													MSTRG.209915.1	MSTRG.209915	0	195.171	Inf	Inf	0.0443559	1	Up	5	405
													MSTRG.103134.1	MSTRG.103134	102.813	0	0	-Inf	0.0445213	1	Down	19	988
													MSTRG.257270.2	MSTRG.257270	101.7	0	0	-Inf	0.0448892	1	Down	9	2252
													MSTRG.214897.1	MSTRG.214897	0	103.409	Inf	Inf	0.0451096	1	Up	5	453
													MSTRG.166493.5	MSTRG.166493	101.125	0	0	-Inf	0.0452107	1	Down	28	648
													ENSBGRT00000032587	ENSBGRG00000017776	0	186.108	Inf	Inf	0.0452257	1	Up	11	3860
													MSTRG.195502.1	MSTRG.195502	0	100.86	Inf	Inf	0.045345	1	Up	4	910
													MSTRG.250291.1	MSTRG.250291	0	186.149	Inf	Inf	0.0454074	1	Up	8	369
													MSTRG.107844.2	MSTRG.107844	100.963	0	0	-Inf	0.0455593	1	Down	2	923
													MSTRG.130787.1	MSTRG.130787	102.558	0	0	-Inf	0.0456683	1	Down	21	558
													MSTRG.204138.1	MSTRG.204138	0	99.8409	Inf	Inf	0.0456848	1	Up	5	623
													MSTRG.163310.12	MSTRG.163310	184.075	0	0	-Inf	0.0458043	1	Down	27	3938
													MSTRG.75481.3	MSTRG.75481	522.374	9.34795	0.0178951	-5.80429	0.0459204	1	Down	16	5249
													MSTRG.244366.1	MSTRG.244366	100.968	0	0	-Inf	0.0459554	1	Down	8	963
													MSTRG.268351.3	MSTRG.268351	103.279	0	0	-Inf	0.0460112	1	Down	X	516
													MSTRG.112115.1	MSTRG.112115	0	101.861	Inf	Inf	0.0460907	1	Up	2	752
													MSTRG.8721.1	MSTRG.8721	100.277	0	0	-Inf	0.0462059	1	Down	1	531
													MSTRG.72199.1	MSTRG.72199	0	99.2667	Inf	Inf	0.0462547	1	Up	15	466
													MSTRG.273832.1	MSTRG.273832	0	99.3644	Inf	Inf	0.0462611	1	Up	X	378
													MSTRG.264178.22	MSTRG.264178	0	177.757	Inf	Inf	0.0462651	1	Up	VBZB01000197.1	1146
													MSTRG.162932.2	MSTRG.162932	99.5232	0	0	-Inf	0.0463523	1	Down	27	1423
													MSTRG.174641.21	MSTRG.174641	179.549	0	0	-Inf	0.0463716	1	Down	3	1501
													MSTRG.251718.2	MSTRG.251718	0	101.262	Inf	Inf	0.0464295	1	Up	9	853
													MSTRG.144963.1	MSTRG.144963	99.3052	0	0	-Inf	0.0465906	1	Down	24	600
													MSTRG.26873.1	MSTRG.26873	101.106	0	0	-Inf	0.0466853	1	Down	11	740
													MSTRG.158471.2	MSTRG.158471	0	99.3663	Inf	Inf	0.0467335	1	Up	26	597
													MSTRG.275375.12	MSTRG.275375	0	173.284	Inf	Inf	0.0468522	1	Up	Y	1152
													MSTRG.247985.5	MSTRG.247985	104.422	0	0	-Inf	0.0468907	1	Down	8	2671
													MSTRG.71423.2	MSTRG.71423	0	173.819	Inf	Inf	0.0469737	1	Up	15	5564
													MSTRG.133663.1	MSTRG.133663	98.9995	0	0	-Inf	0.0469755	1	Down	22	431
													MSTRG.166924.1	MSTRG.166924	0	98.8671	Inf	Inf	0.0472641	1	Up	28	651
													MSTRG.162941.3	MSTRG.162941	189.575	0	0	-Inf	0.0473532	1	Down	27	4746
													MSTRG.243692.1	MSTRG.243692	0	98.2951	Inf	Inf	0.0473695	1	Up	8	694
													MSTRG.240844.1	MSTRG.240844	0	100.545	Inf	Inf	0.0473705	1	Up	8	432
													MSTRG.205200.2	MSTRG.205200	0	100.429	Inf	Inf	0.0474551	1	Up	5	727
													MSTRG.221868.7	MSTRG.221868	186.587	0	0	-Inf	0.0477267	1	Down	6	3181
													MSTRG.235573.1	MSTRG.235573	99.189	0	0	-Inf	0.0479139	1	Down	7	626
													MSTRG.23199.1	MSTRG.23199	0	98.0575	Inf	Inf	0.0479557	1	Up	10	790
													MSTRG.23201.3	MSTRG.23201	0	186.344	Inf	Inf	0.0480311	1	Up	10	2687
													MSTRG.45304.24	MSTRG.45304	0	161.95	Inf	Inf	0.0484462	1	Up	12	2284
													MSTRG.237514.1	MSTRG.237514	0	182.637	Inf	Inf	0.0485112	1	Up	7	1180
													MSTRG.124088.17	MSTRG.124088	0.30291	358.199	1182.53	10.2077	0.0487687	1	Up	20	2434
													MSTRG.188263.3	MSTRG.188263	154.859	0.902176	0.00582578	-7.42333	0.0488256	1	Down	4	1261
													MSTRG.145695.1	MSTRG.145695	98.1513	0	0	-Inf	0.0488727	1	Down	24	542
													MSTRG.249146.1	MSTRG.249146	141.759	0.596501	0.00420786	-7.8927	0.0488876	1	Down	8	1486
													MSTRG.137602.13	MSTRG.137602	116.692	0	0	-Inf	0.0489306	1	Down	22	1429
													MSTRG.167228.2	MSTRG.167228	0	97.3331	Inf	Inf	0.0489321	1	Up	28	585
													MSTRG.98113.8	MSTRG.98113	0	158.669	Inf	Inf	0.048939	1	Up	19	989
													MSTRG.216565.3	MSTRG.216565	0	157.883	Inf	Inf	0.0490026	1	Up	6	2277
													MSTRG.270777.26	MSTRG.270777	0	157.881	Inf	Inf	0.0492621	1	Up	X	5603
													MSTRG.135849.1	MSTRG.135849	97.0187	0	0	-Inf	0.0495796	1	Down	22	814
													MSTRG.116094.7	MSTRG.116094	233.907	2.98251	0.0127508	-6.29327	0.0495809	1	Down	2	1524
													MSTRG.170580.3	MSTRG.170580	204.311	4055.64	19.8503	4.31109	0.0498959	1	Up	29	446
