# Supplementary material for: Whole transcriptomic analysis revealed the effects of different dietary protein levels on the growth and development of Jersey-yak
Source: Research Square preprint supplement (doi:10.21203/rs.3.rs-7466956/v1), 2025-09-30
Supplement: Supplementary file 5 [file 988b416b0f3244a461f40409.xlsx]

## Sheet: LP vs MP
GO analysis for differential expression miRNAs between LP vs MP									KEGG pathway analysis for differential expression miRNAs between LP vs MP										GO analysis for differential expression circRNAs between LP vs MP									KEGG pathway analysis for differential expression circRNAs between LP vs MP
Category	GO.ID	Term	list	Total	Gene	Pvalue	FDR		PathwayID	Pathway	Level1	Level2	list_number	total_number	Gene	Pvalue	FDR		Category	GO.ID	Term	list	Total	Pvalue	FDR	Gene		PathwayID	Pathway	Level1	Level2	list_number	total_number	Pvalue	FDR	Gene	URL
MF	GO:0005488	binding	990	10057	ENSBGRG00000000017(ROBO2),ENSBGRG00000000061(GABPA),ENSBGRG00000000074(N6AMT1),ENSBGRG00000000131(IFNAR2),ENSBGRG00000000174,ENSBGRG00000000197(EPHA3),ENSBGRG00000000213(NFE2L2),ENSBGRG00000000215(PLCL2),ENSBGRG00000000221(F3),ENSBGRG00000000235,ENSBGRG00000000237(AGPS),ENSBGRG00000000250(ATP13A5),ENSBGRG00000000266(PROS1),ENSBGRG00000000276(HERPUD2),ENSBGRG00000000283(HP1BP3),ENSBGRG00000000285(…	9.91e-14	1.44e-10		ko05165	Human papillomavirus infection	Human Diseases	Infectious disease: viral	39	292	ENSBGRG00000005405,ENSBGRG00000019557(WNT5B),ENSBGRG00000021026(COL4A6),ENSBGRG00000007688(FZD6),ENSBGRG00000023763(LFNG),ENSBGRG00000017283(FAS),ENSBGRG00000007038(FASLG),ENSBGRG00000024848,ENSBGRG00000023559(PRKACA),ENSBGRG00000001167(PRKACB),ENSBGRG00000009912(PPP2R1B),ENSBGRG00000013466(COL1A2),ENSBGRG00000024969(RBL2),ENSBGRG00000004717(ITGA5),ENSBGRG00000001789(STAT1),ENSBGRG00000020100(RB1…	0.00381118	0.469123		BP	GO:0051128	regulation of cellular component organization	64	3157	3.25037e-07	0.00137165	ENSBGRG00000000266(PROS1),ENSBGRG00000000973(FGD6),ENSBGRG00000001141(ABCA1),ENSBGRG00000001761(IFRD1),ENSBGRG00000001896(DENND4C),ENSBGRG00000002158(HMBOX1),ENSBGRG00000002518(DDR2),ENSBGRG00000002693(APBB2),ENSBGRG00000002944(TOMM70),ENSBGRG00000003960(ENAH),ENSBGRG00000004274(RABGAP1L),ENSBGRG00000004749(MYL1),ENSBGRG00000005235(TENT2),ENSBGRG00000005379(ATG5),ENSBGRG00000005984(CSNK1D),ENSBGR…		bgr02010	ABC transporters	Environmental Information Processing	Membrane transport	3	49	0.0104472	0.208944	ENSBGRG00000020672(ABCG2),ENSBGRG00000023586(ABCC1),ENSBGRG00000001141(ABCA1)	http://www.kegg.jp/kegg-bin/show_pathway?map=map02010&multi_query=K05641+%23FFFFFF,red%0d%0aK05665+%23FFFFFF,red%0d%0aK05681+%23FFFFFF,red%0d%0a
CC	GO:0005622	intracellular	887	9067	ENSBGRG00000000004(VGLL3),ENSBGRG00000000061(GABPA),ENSBGRG00000000074(N6AMT1),ENSBGRG00000000082(GRIK1),ENSBGRG00000000197(EPHA3),ENSBGRG00000000203(DDOST),ENSBGRG00000000213(NFE2L2),ENSBGRG00000000237(AGPS),ENSBGRG00000000283(HP1BP3),ENSBGRG00000000285(CIART),ENSBGRG00000000341(RBM45),ENSBGRG00000000428(ATR),ENSBGRG00000000440(PYM1),ENSBGRG00000000461(NR4A3),ENSBGRG00000000520(DPYSL2),ENSBGRG00…	5.51e-08	4.71e-05		ko04710	Circadian rhythm	Organismal Systems	Environmental adaptation	8	31	ENSBGRG00000005984(CSNK1D),ENSBGRG00000001150(PRKAG1),ENSBGRG00000002783(RORC),ENSBGRG00000000593(PRKAA2),ENSBGRG00000020463(NR1D1),ENSBGRG00000015409(CRY1),ENSBGRG00000010942(PRKAB2),ENSBGRG00000016630(PRKAB1)	0.00391229	0.469123		MF	GO:0031267	small GTPase binding	20	553	4.94409e-06	0.00318399	ENSBGRG00000000973(FGD6),ENSBGRG00000001141(ABCA1),ENSBGRG00000001896(DENND4C),ENSBGRG00000002824(USP33),ENSBGRG00000003783(SPTB),ENSBGRG00000004086(DENND5B),ENSBGRG00000004274(RABGAP1L),ENSBGRG00000007364(DENND2B),ENSBGRG00000009140(PRKCH),ENSBGRG00000013023(RAPGEF1),ENSBGRG00000015284(SPTBN1),ENSBGRG00000015822(RABGAP1),ENSBGRG00000016018(ABR),ENSBGRG00000016288(MAGI2),ENSBGRG00000017494(DOCK11…		bgr00562	Inositol phosphate metabolism	Metabolism	Carbohydrate metabolism	3	67	0.0243663	0.243663	ENSBGRG00000021365(PIK3C3),ENSBGRG00000006248(PIKFYVE),ENSBGRG00000020985(INPP4B)	http://www.kegg.jp/kegg-bin/show_pathway?map=map00562&multi_query=K00914+%23FFFFFF,red%0d%0aK00921+%23FFFFFF,red%0d%0aK01109+%23FFFFFF,red%0d%0a
BP	GO:0048518	positive regulation of biological process	437	3985	ENSBGRG00000000061(GABPA),ENSBGRG00000000074(N6AMT1),ENSBGRG00000000197(EPHA3),ENSBGRG00000000213(NFE2L2),ENSBGRG00000000215(PLCL2),ENSBGRG00000000221(F3),ENSBGRG00000000351(EEPD1),ENSBGRG00000000405(MFSD2A),ENSBGRG00000000428(ATR),ENSBGRG00000000440(PYM1),ENSBGRG00000000461(NR4A3),ENSBGRG00000000542(CRTC1),ENSBGRG00000000587(GPSM2),ENSBGRG00000000593(PRKAA2),ENSBGRG00000000726(PPIE),ENSBGRG00000…	1.56e-07	0.0011394		ko04371	Apelin signaling pathway	Environmental Information Processing	Signal transduction	19	115	ENSBGRG00000026668(PIK3R6),ENSBGRG00000013000(NOS2),ENSBGRG00000007268(PIK3CG),ENSBGRG00000020407(SPP1),ENSBGRG00000014262(PPARGC1A),ENSBGRG00000019113(TFAM),ENSBGRG00000024537(SMAD4),ENSBGRG00000005696,ENSBGRG00000010942(PRKAB2),ENSBGRG00000016630(PRKAB1),ENSBGRG00000021365(PIK3C3),ENSBGRG00000025440(SERPINE1),ENSBGRG00000000673(ADCY6),ENSBGRG00000023559(PRKACA),ENSBGRG00000001167(PRKACB),ENSBGR…	0.00426476	0.469123		MF	GO:0051020	GTPase binding	21	643	1.34702e-05	0.00433739	ENSBGRG00000000973(FGD6),ENSBGRG00000001141(ABCA1),ENSBGRG00000001896(DENND4C),ENSBGRG00000002824(USP33),ENSBGRG00000003783(SPTB),ENSBGRG00000004086(DENND5B),ENSBGRG00000004274(RABGAP1L),ENSBGRG00000007364(DENND2B),ENSBGRG00000009140(PRKCH),ENSBGRG00000009644(PPP1R9A),ENSBGRG00000013023(RAPGEF1),ENSBGRG00000015284(SPTBN1),ENSBGRG00000015822(RABGAP1),ENSBGRG00000016018(ABR),ENSBGRG00000016288(MAGI…		bgr02024	Quorum sensing	Cellular Processes	Cellular community - prokaryotes	1	10	0.0923582	0.462683	ENSBGRG00000016568(ACSL3)	http://www.kegg.jp/kegg-bin/show_pathway?map=map02024&multi_query=K01897+%23FFFFFF,red%0d%0a
CC	GO:0043227	membrane-bounded organelle	699	6905	ENSBGRG00000000004(VGLL3),ENSBGRG00000000061(GABPA),ENSBGRG00000000074(N6AMT1),ENSBGRG00000000082(GRIK1),ENSBGRG00000000197(EPHA3),ENSBGRG00000000203(DDOST),ENSBGRG00000000213(NFE2L2),ENSBGRG00000000237(AGPS),ENSBGRG00000000283(HP1BP3),ENSBGRG00000000285(CIART),ENSBGRG00000000341(RBM45),ENSBGRG00000000428(ATR),ENSBGRG00000000440(PYM1),ENSBGRG00000000461(NR4A3),ENSBGRG00000000535,ENSBGRG0000000054…	2.19e-07	9.38e-05		ko00330	Arginine and proline metabolism	Metabolism	Amino acid metabolism	10	48	ENSBGRG00000003404(ALDH4A1),ENSBGRG00000013578,ENSBGRG00000013000(NOS2),ENSBGRG00000004273(PYCR1),ENSBGRG00000011775(NOS1),ENSBGRG00000020079(LAP3),ENSBGRG00000011804,ENSBGRG00000023825(PRODH2),ENSBGRG00000019341(GATM),ENSBGRG00000025600(ALDH18A1)	0.0069325	0.49861		BP	GO:0002119	nematode larval development	16	428	2.53073e-05	0.0402606	ENSBGRG00000002693(APBB2),ENSBGRG00000004626(CBLB),ENSBGRG00000006060(IGF1R),ENSBGRG00000007061(RRAS2),ENSBGRG00000009140(PRKCH),ENSBGRG00000010412(ATP2A2),ENSBGRG00000012411(LRBA),ENSBGRG00000012463(RERE),ENSBGRG00000015284(SPTBN1),ENSBGRG00000015942(EBF1),ENSBGRG00000016974(NBEA),ENSBGRG00000019601(CAMSAP2),ENSBGRG00000020282(SMARCA5),ENSBGRG00000021365(PIK3C3),ENSBGRG00000022197(FBXL2),ENSBGRG…		bgr00310	Lysine degradation	Metabolism	Amino acid metabolism	2	62	0.117738	0.462683	ENSBGRG00000011253(EHMT1),ENSBGRG00000016971(NSD3)	http://www.kegg.jp/kegg-bin/show_pathway?map=map00310&multi_query=K11420+%23FFFFFF,red%0d%0aK11425+%23FFFFFF,red%0d%0a
BP	GO:0048522	positive regulation of cellular process	397	3613	ENSBGRG00000000061(GABPA),ENSBGRG00000000074(N6AMT1),ENSBGRG00000000197(EPHA3),ENSBGRG00000000213(NFE2L2),ENSBGRG00000000221(F3),ENSBGRG00000000405(MFSD2A),ENSBGRG00000000428(ATR),ENSBGRG00000000440(PYM1),ENSBGRG00000000461(NR4A3),ENSBGRG00000000542(CRTC1),ENSBGRG00000000587(GPSM2),ENSBGRG00000000593(PRKAA2),ENSBGRG00000000764(CDKN1B),ENSBGRG00000000766(TRIM35),ENSBGRG00000000770(ECE1),ENSBGRG000…	7.16e-07	0.00261963		ko04151	PI3K-Akt signaling pathway	Environmental Information Processing	Signal transduction	41	326	ENSBGRG00000013226(PPP2R2C),ENSBGRG00000007268(PIK3CG),ENSBGRG00000025800,ENSBGRG00000009260,ENSBGRG00000020407(SPP1),ENSBGRG00000010905(VEGFD),ENSBGRG00000007174(FOXO3),ENSBGRG00000000764(CDKN1B),ENSBGRG00000016285,ENSBGRG00000020277(IBSP),ENSBGRG00000026668(PIK3R6),ENSBGRG00000022165(COL9A1),ENSBGRG00000000131(IFNAR2),ENSBGRG00000004485(G6PC3),ENSBGRG00000020676(CSF1R),ENSBGRG00000017062(MYB),E…	0.00872177	0.49861		MF	GO:0140303	intramembrane lipid transporter activity	4	16	2.68151e-05	0.0057563	ENSBGRG00000001141(ABCA1),ENSBGRG00000011855(ATP8B1),ENSBGRG00000021443(ANO6),ENSBGRG00000023586(ABCC1)		bgr00910	Nitrogen metabolism	Metabolism	Energy metabolism	1	15	0.135457	0.462683	ENSBGRG00000026591(ENSBGRG00000026591)	http://www.kegg.jp/kegg-bin/show_pathway?map=map00910&multi_query=K00261+%23FFFFFF,red%0d%0a
CC	GO:0043231	intracellular membrane-bounded organelle	648	6384	ENSBGRG00000000004(VGLL3),ENSBGRG00000000061(GABPA),ENSBGRG00000000074(N6AMT1),ENSBGRG00000000082(GRIK1),ENSBGRG00000000197(EPHA3),ENSBGRG00000000203(DDOST),ENSBGRG00000000213(NFE2L2),ENSBGRG00000000237(AGPS),ENSBGRG00000000283(HP1BP3),ENSBGRG00000000285(CIART),ENSBGRG00000000341(RBM45),ENSBGRG00000000428(ATR),ENSBGRG00000000440(PYM1),ENSBGRG00000000461(NR4A3),ENSBGRG00000000535,ENSBGRG0000000054…	1.09e-06	0.000309241		ko04921	Oxytocin signaling pathway	Organismal Systems	Endocrine system	19	124	ENSBGRG00000016630(PRKAB1),ENSBGRG00000010942(PRKAB2),ENSBGRG00000007268(PIK3CG),ENSBGRG00000023016(MAPK7),ENSBGRG00000005672(SRC),ENSBGRG00000018786(PTGS2),ENSBGRG00000026668(PIK3R6),ENSBGRG00000021717(CACNG7),ENSBGRG00000001150(PRKAG1),ENSBGRG00000021871(CACNG6),ENSBGRG00000024381(EEF2K),ENSBGRG00000002633(PPP3CA),ENSBGRG00000021687(CACNA2D3),ENSBGRG00000021420(CAMK2A),ENSBGRG00000023559(PRKACA…	0.00968572	0.49861		MF	GO:0017016	Ras GTPase binding	18	535	3.97397e-05	0.0063981	ENSBGRG00000001896(DENND4C),ENSBGRG00000002824(USP33),ENSBGRG00000003783(SPTB),ENSBGRG00000004086(DENND5B),ENSBGRG00000004274(RABGAP1L),ENSBGRG00000007364(DENND2B),ENSBGRG00000009140(PRKCH),ENSBGRG00000013023(RAPGEF1),ENSBGRG00000015284(SPTBN1),ENSBGRG00000015822(RABGAP1),ENSBGRG00000016018(ABR),ENSBGRG00000016288(MAGI2),ENSBGRG00000017494(DOCK11),ENSBGRG00000018618(DOCK7),ENSBGRG00000022862(DOCK…		bgr00061	Fatty acid biosynthesis	Metabolism	Lipid metabolism	1	18	0.160381	0.462683	ENSBGRG00000016568(ACSL3)	http://www.kegg.jp/kegg-bin/show_pathway?map=map00061&multi_query=K01897+%23FFFFFF,red%0d%0a
BP	GO:0051179	localization	439	4097	ENSBGRG00000000082(GRIK1),ENSBGRG00000000197(EPHA3),ENSBGRG00000000213(NFE2L2),ENSBGRG00000000250(ATP13A5),ENSBGRG00000000351(EEPD1),ENSBGRG00000000405(MFSD2A),ENSBGRG00000000428(ATR),ENSBGRG00000000461(NR4A3),ENSBGRG00000000587(GPSM2),ENSBGRG00000000593(PRKAA2),ENSBGRG00000000764(CDKN1B),ENSBGRG00000000785(DDX39A),ENSBGRG00000000798(GABRG2),ENSBGRG00000000918(STK36),ENSBGRG00000001004(VDAC1),ENS…	2.46e-06	0.00463114		ko04152	AMPK signaling pathway	Environmental Information Processing	Signal transduction	17	108	ENSBGRG00000004498(PFKP),ENSBGRG00000018041(MLYCD),ENSBGRG00000014792(ACACA),ENSBGRG00000023293(SCD5),ENSBGRG00000004485(G6PC3),ENSBGRG00000014262(PPARGC1A),ENSBGRG00000000593(PRKAA2),ENSBGRG00000009912(PPP2R1B),ENSBGRG00000018175(PFKFB2),ENSBGRG00000024381(EEF2K),ENSBGRG00000001150(PRKAG1),ENSBGRG00000007174(FOXO3),ENSBGRG00000016630(PRKAB1),ENSBGRG00000010942(PRKAB2),ENSBGRG00000013814(STK11),E…	0.0107864	0.49861		BP	GO:0007275	multicellular organism development	103	6859	4.14429e-05	0.0402606	ENSBGRG00000000266(PROS1),ENSBGRG00000000599(ENSBGRG00000000599),ENSBGRG00000000629(GNPTAB),ENSBGRG00000001761(IFRD1),ENSBGRG00000002518(DDR2),ENSBGRG00000002693(APBB2),ENSBGRG00000002824(USP33),ENSBGRG00000002944(TOMM70),ENSBGRG00000003783(SPTB),ENSBGRG00000003960(ENAH),ENSBGRG00000004086(DENND5B),ENSBGRG00000004149(PTBP3),ENSBGRG00000004274(RABGAP1L),ENSBGRG00000004461(LRRK1),ENSBGRG00000004575…		bgr00220	Arginine biosynthesis	Metabolism	Amino acid metabolism	1	20	0.176618	0.462683	ENSBGRG00000026591(ENSBGRG00000026591)	http://www.kegg.jp/kegg-bin/show_pathway?map=map00220&multi_query=K00261+%23FFFFFF,red%0d%0a
BP	GO:0048731	system development	327	2926	ENSBGRG00000000061(GABPA),ENSBGRG00000000197(EPHA3),ENSBGRG00000000213(NFE2L2),ENSBGRG00000000215(PLCL2),ENSBGRG00000000221(F3),ENSBGRG00000000405(MFSD2A),ENSBGRG00000000520(DPYSL2),ENSBGRG00000000682(CECR2),ENSBGRG00000000764(CDKN1B),ENSBGRG00000000770(ECE1),ENSBGRG00000000798(GABRG2),ENSBGRG00000000909(FSTL4),ENSBGRG00000000918(STK36),ENSBGRG00000001070(ATXN10),ENSBGRG00000001078(WNT10B),ENSBGR…	2.54e-06	0.00463114		ko05204	Chemical carcinogenesis - DNA adducts	Human Diseases	Cancer: overview	8	37	ENSBGRG00000002112(GSTM3),ENSBGRG00000002079,ENSBGRG00000022014,ENSBGRG00000017832(CYP2E1),ENSBGRG00000025285,ENSBGRG00000011055,ENSBGRG00000003295(MGST3),ENSBGRG00000018786(PTGS2)	0.0120875	0.49861		BP	GO:0045332	phospholipid translocation	5	36	4.69884e-05	0.0402606	ENSBGRG00000001141(ABCA1),ENSBGRG00000011855(ATP8B1),ENSBGRG00000012550(ATP8B4),ENSBGRG00000021443(ANO6),ENSBGRG00000023586(ABCC1)		bgr00680	Methane metabolism	Metabolism	Energy metabolism	1	23	0.200419	0.462683	ENSBGRG00000000599(ENSBGRG00000000599)	http://www.kegg.jp/kegg-bin/show_pathway?map=map00680&multi_query=K01623+%23FFFFFF,red%0d%0a
MF	GO:0005515	protein binding	658	6620	ENSBGRG00000000017(ROBO2),ENSBGRG00000000131(IFNAR2),ENSBGRG00000000174,ENSBGRG00000000197(EPHA3),ENSBGRG00000000213(NFE2L2),ENSBGRG00000000215(PLCL2),ENSBGRG00000000221(F3),ENSBGRG00000000276(HERPUD2),ENSBGRG00000000288(PDE11A),ENSBGRG00000000420(EIF4G3),ENSBGRG00000000428(ATR),ENSBGRG00000000461(NR4A3),ENSBGRG00000000520(DPYSL2),ENSBGRG00000000542(CRTC1),ENSBGRG00000000587(GPSM2),ENSBGRG0000000…	2.55e-06	0.00185608		ko05200	Pathways in cancer	Human Diseases	Cancer: overview	55	478	ENSBGRG00000006002(JAG2),ENSBGRG00000021026(COL4A6),ENSBGRG00000010331(RUNX1T1),ENSBGRG00000005369(FLT3),ENSBGRG00000022014,ENSBGRG00000019275(PLCG2),ENSBGRG00000007038(FASLG),ENSBGRG00000018824(CXCL12),ENSBGRG00000020676(CSF1R),ENSBGRG00000024291(PTGER4),ENSBGRG00000013000(NOS2),ENSBGRG00000018786(PTGS2),ENSBGRG00000022496(ARNT2),ENSBGRG00000000131(IFNAR2),ENSBGRG00000003295(MGST3),ENSBGRG000000…	0.0156628	0.517214		BP	GO:0034204	lipid translocation	5	37	5.38417e-05	0.0402606	ENSBGRG00000001141(ABCA1),ENSBGRG00000011855(ATP8B1),ENSBGRG00000012550(ATP8B4),ENSBGRG00000021443(ANO6),ENSBGRG00000023586(ABCC1)		bgr00030	Pentose phosphate pathway	Metabolism	Carbohydrate metabolism	1	24	0.208207	0.462683	ENSBGRG00000000599(ENSBGRG00000000599)	http://www.kegg.jp/kegg-bin/show_pathway?map=map00030&multi_query=K01623+%23FFFFFF,red%0d%0a
CC	GO:0031981	nuclear lumen	330	2973	ENSBGRG00000000061(GABPA),ENSBGRG00000000197(EPHA3),ENSBGRG00000000213(NFE2L2),ENSBGRG00000000237(AGPS),ENSBGRG00000000283(HP1BP3),ENSBGRG00000000341(RBM45),ENSBGRG00000000428(ATR),ENSBGRG00000000440(PYM1),ENSBGRG00000000542(CRTC1),ENSBGRG00000000593(PRKAA2),ENSBGRG00000000682(CECR2),ENSBGRG00000000726(PPIE),ENSBGRG00000000764(CDKN1B),ENSBGRG00000000785(DDX39A),ENSBGRG00000000867(IKZF4),ENSBGRG00…	2.71e-06	0.000517086		ko04145	Phagosome	Cellular Processes	Transport and catabolism	19	131	ENSBGRG00000011775(NOS1),ENSBGRG00000026148,ENSBGRG00000026156,ENSBGRG00000022452,ENSBGRG00000004174(CANX),ENSBGRG00000026030(TUBB4A),ENSBGRG00000021365(PIK3C3),ENSBGRG00000005559(ATP6V1B1),ENSBGRG00000009889(ATP6V0A1),ENSBGRG00000004717(ITGA5),ENSBGRG00000017890(THBS3),ENSBGRG00000019097(DYNC2H1),ENSBGRG00000019776(CLEC7A),ENSBGRG00000012214(SCARB1),ENSBGRG00000024848,ENSBGRG00000009260,ENSBGRG0…	0.0169205	0.517214		BP	GO:0002164	larval development	18	560	5.72425e-05	0.0402606	ENSBGRG00000002693(APBB2),ENSBGRG00000004626(CBLB),ENSBGRG00000006060(IGF1R),ENSBGRG00000007061(RRAS2),ENSBGRG00000009140(PRKCH),ENSBGRG00000010412(ATP2A2),ENSBGRG00000012411(LRBA),ENSBGRG00000012463(RERE),ENSBGRG00000014876(ATP7B),ENSBGRG00000015284(SPTBN1),ENSBGRG00000015942(EBF1),ENSBGRG00000016974(NBEA),ENSBGRG00000019601(CAMSAP2),ENSBGRG00000020282(SMARCA5),ENSBGRG00000021365(PIK3C3),ENSBGRG…		bgr00564	Glycerophospholipid metabolism	Metabolism	Lipid metabolism	2	101	0.253278	0.483289	ENSBGRG00000006350(GPCPD1),ENSBGRG00000005383(DGKH)	http://www.kegg.jp/kegg-bin/show_pathway?map=map00564&multi_query=K00901+%23FFFFFF,red%0d%0aK18695+%23FFFFFF,red%0d%0a
BP	GO:0007275	multicellular organism development	349	3163	ENSBGRG00000000061(GABPA),ENSBGRG00000000197(EPHA3),ENSBGRG00000000213(NFE2L2),ENSBGRG00000000215(PLCL2),ENSBGRG00000000221(F3),ENSBGRG00000000405(MFSD2A),ENSBGRG00000000520(DPYSL2),ENSBGRG00000000682(CECR2),ENSBGRG00000000764(CDKN1B),ENSBGRG00000000770(ECE1),ENSBGRG00000000798(GABRG2),ENSBGRG00000000909(FSTL4),ENSBGRG00000000918(STK36),ENSBGRG00000001070(ATXN10),ENSBGRG00000001078(WNT10B),ENSBGR…	3.43e-06	0.00463114		ko04966	Collecting duct acid secretion	Organismal Systems	Excretory system	6	25	ENSBGRG00000024848,ENSBGRG00000007178(SLC12A7),ENSBGRG00000017325(ATP4B),ENSBGRG00000009889(ATP6V0A1),ENSBGRG00000001479(ATP6V1A),ENSBGRG00000005559(ATP6V1B1)	0.0173338	0.517214		MF	GO:0140326	ATPase-coupled intramembrane lipid transporter activity	3	8	7.85553e-05	0.0101179	ENSBGRG00000001141(ABCA1),ENSBGRG00000011855(ATP8B1),ENSBGRG00000023586(ABCC1)		bgr00051	Fructose and mannose metabolism	Metabolism	Carbohydrate metabolism	1	35	0.28928	0.483289	ENSBGRG00000000599(ENSBGRG00000000599)	http://www.kegg.jp/kegg-bin/show_pathway?map=map00051&multi_query=K01623+%23FFFFFF,red%0d%0a
BP	GO:0031323	regulation of cellular metabolic process	422	3932	ENSBGRG00000000004(VGLL3),ENSBGRG00000000061(GABPA),ENSBGRG00000000213(NFE2L2),ENSBGRG00000000221(F3),ENSBGRG00000000235,ENSBGRG00000000283(HP1BP3),ENSBGRG00000000285(CIART),ENSBGRG00000000405(MFSD2A),ENSBGRG00000000428(ATR),ENSBGRG00000000440(PYM1),ENSBGRG00000000461(NR4A3),ENSBGRG00000000535,ENSBGRG00000000542(CRTC1),ENSBGRG00000000571(DRAM1),ENSBGRG00000000593(PRKAA2),ENSBGRG00000000726(PPIE),…	3.8e-06	0.00463114		ko04512	ECM-receptor interaction	Environmental Information Processing	Signaling molecules and interaction	13	80	ENSBGRG00000020407(SPP1),ENSBGRG00000022165(COL9A1),ENSBGRG00000010970(ITGA6),ENSBGRG00000016632(LAMB2),ENSBGRG00000016418(SV2A),ENSBGRG00000009568(LAMC3),ENSBGRG00000020277(IBSP),ENSBGRG00000004717(ITGA5),ENSBGRG00000017890(THBS3),ENSBGRG00000005405,ENSBGRG00000021026(COL4A6),ENSBGRG00000020517(CD44),ENSBGRG00000013466(COL1A2)	0.0188078	0.517214		BP	GO:0097035	regulation of membrane lipid distribution	5	40	7.91042e-05	0.0471415	ENSBGRG00000001141(ABCA1),ENSBGRG00000011855(ATP8B1),ENSBGRG00000012550(ATP8B4),ENSBGRG00000021443(ANO6),ENSBGRG00000023586(ABCC1)		bgr00250	Alanine, aspartate and glutamate metabolism	Metabolism	Amino acid metabolism	1	37	0.303151	0.483289	ENSBGRG00000026591(ENSBGRG00000026591)	http://www.kegg.jp/kegg-bin/show_pathway?map=map00250&multi_query=K00261+%23FFFFFF,red%0d%0a
CC	GO:0005737	cytoplasm	632	6256	ENSBGRG00000000197(EPHA3),ENSBGRG00000000203(DDOST),ENSBGRG00000000213(NFE2L2),ENSBGRG00000000237(AGPS),ENSBGRG00000000341(RBM45),ENSBGRG00000000428(ATR),ENSBGRG00000000440(PYM1),ENSBGRG00000000520(DPYSL2),ENSBGRG00000000542(CRTC1),ENSBGRG00000000571(DRAM1),ENSBGRG00000000587(GPSM2),ENSBGRG00000000593(PRKAA2),ENSBGRG00000000711(METAP2),ENSBGRG00000000726(PPIE),ENSBGRG00000000764(CDKN1B),ENSBGRG00…	4.33e-06	0.000517086		ko05031	Amphetamine addiction	Human Diseases	Substance dependence	10	57	ENSBGRG00000013578,ENSBGRG00000019173(SLC18A2),ENSBGRG00000022164(FOSB),ENSBGRG00000010593(PDYN),ENSBGRG00000010476(GRIA3),ENSBGRG00000021420(CAMK2A),ENSBGRG00000020983(GRIA4),ENSBGRG00000002633(PPP3CA),ENSBGRG00000001167(PRKACB),ENSBGRG00000023559(PRKACA)	0.0227223	0.552477		BP	GO:0043085	positive regulation of catalytic activity	33	1480	8.93678e-05	0.0471415	ENSBGRG00000000599(ENSBGRG00000000599),ENSBGRG00000001896(DENND4C),ENSBGRG00000002158(HMBOX1),ENSBGRG00000002518(DDR2),ENSBGRG00000004274(RABGAP1L),ENSBGRG00000004575(SERINC5),ENSBGRG00000005343(ENSBGRG00000005343),ENSBGRG00000008391(PRRC1),ENSBGRG00000008463(TLK1),ENSBGRG00000009644(PPP1R9A),ENSBGRG00000010412(ATP2A2),ENSBGRG00000011309(ARHGAP18),ENSBGRG00000011586(ERCC6),ENSBGRG00000013023(RAPG…		bgr03420	Nucleotide excision repair	Genetic Information Processing	Replication and repair	1	41	0.33013	0.483289	ENSBGRG00000011586(ERCC6)	http://www.kegg.jp/kegg-bin/show_pathway?map=map03420&multi_query=K10841+%23FFFFFF,red%0d%0a
CC	GO:0031974	membrane-enclosed lumen	350	3200	ENSBGRG00000000061(GABPA),ENSBGRG00000000197(EPHA3),ENSBGRG00000000213(NFE2L2),ENSBGRG00000000237(AGPS),ENSBGRG00000000283(HP1BP3),ENSBGRG00000000341(RBM45),ENSBGRG00000000428(ATR),ENSBGRG00000000440(PYM1),ENSBGRG00000000542(CRTC1),ENSBGRG00000000593(PRKAA2),ENSBGRG00000000682(CECR2),ENSBGRG00000000726(PPIE),ENSBGRG00000000764(CDKN1B),ENSBGRG00000000785(DDX39A),ENSBGRG00000000867(IKZF4),ENSBGRG00…	4.84e-06	0.000517086		ko03018	RNA degradation	Genetic Information Processing	Folding, sorting and degradation	12	74	ENSBGRG00000009967(TENT4B),ENSBGRG00000005813(PAN3),ENSBGRG00000023777(EDC4),ENSBGRG00000009794(TENT4A),ENSBGRG00000012216(CNOT1),ENSBGRG00000004498(PFKP),ENSBGRG00000002139,ENSBGRG00000006587(EXOSC9),ENSBGRG00000011128(EXOSC10),ENSBGRG00000017265,ENSBGRG00000014538(PABPC1L),ENSBGRG00000026089(PARN)	0.0238168	0.552477		MF	GO:0005088	Ras guanyl-nucleotide exchange factor activity	11	243	0.000109033	0.0117029	ENSBGRG00000001896(DENND4C),ENSBGRG00000003783(SPTB),ENSBGRG00000004086(DENND5B),ENSBGRG00000007364(DENND2B),ENSBGRG00000013023(RAPGEF1),ENSBGRG00000015284(SPTBN1),ENSBGRG00000016018(ABR),ENSBGRG00000017494(DOCK11),ENSBGRG00000018618(DOCK7),ENSBGRG00000022862(DOCK9),ENSBGRG00000024953(DENND4A)		bgr00071	Fatty acid degradation	Metabolism	Lipid metabolism	1	45	0.35612	0.483289	ENSBGRG00000016568(ACSL3)	http://www.kegg.jp/kegg-bin/show_pathway?map=map00071&multi_query=K01897+%23FFFFFF,red%0d%0a
CC	GO:0043233	organelle lumen	350	3200	ENSBGRG00000000061(GABPA),ENSBGRG00000000197(EPHA3),ENSBGRG00000000213(NFE2L2),ENSBGRG00000000237(AGPS),ENSBGRG00000000283(HP1BP3),ENSBGRG00000000341(RBM45),ENSBGRG00000000428(ATR),ENSBGRG00000000440(PYM1),ENSBGRG00000000542(CRTC1),ENSBGRG00000000593(PRKAA2),ENSBGRG00000000682(CECR2),ENSBGRG00000000726(PPIE),ENSBGRG00000000764(CDKN1B),ENSBGRG00000000785(DDX39A),ENSBGRG00000000867(IKZF4),ENSBGRG00…	4.84e-06	0.000517086		ko05202	Transcriptional misregulation in cancer	Human Diseases	Cancer: overview	24	183	ENSBGRG00000010476(GRIA3),ENSBGRG00000000461(NR4A3),ENSBGRG00000015485(PAX8),ENSBGRG00000007727(CDKN2C),ENSBGRG00000014113(ATM),ENSBGRG00000018711(MMP3),ENSBGRG00000003613(PBX3),ENSBGRG00000008619(SIX1),ENSBGRG00000022802(FUS),ENSBGRG00000009260,ENSBGRG00000019008(LMO2),ENSBGRG00000000764(CDKN1B),ENSBGRG00000015861(AFF1),ENSBGRG00000002337(ETV5),ENSBGRG00000016285,ENSBGRG00000025453(RUNX2),ENSBGR…	0.0251126	0.552477		BP	GO:0048856	anatomical structure development	107	7382	0.000129977	0.0609449	ENSBGRG00000000266(PROS1),ENSBGRG00000000599(ENSBGRG00000000599),ENSBGRG00000000629(GNPTAB),ENSBGRG00000000973(FGD6),ENSBGRG00000001761(IFRD1),ENSBGRG00000002518(DDR2),ENSBGRG00000002693(APBB2),ENSBGRG00000002824(USP33),ENSBGRG00000002944(TOMM70),ENSBGRG00000003783(SPTB),ENSBGRG00000003960(ENAH),ENSBGRG00000004086(DENND5B),ENSBGRG00000004149(PTBP3),ENSBGRG00000004274(RABGAP1L),ENSBGRG00000004461(…		bgr00970	Aminoacyl-tRNA biosynthesis	Genetic Information Processing	Translation	1	46	0.362467	0.483289	ENSBGRG00000012212(WARS2)	http://www.kegg.jp/kegg-bin/show_pathway?map=map00970&multi_query=K01867+%23FFFFFF,red%0d%0a
CC	GO:0070013	intracellular organelle lumen	350	3200	ENSBGRG00000000061(GABPA),ENSBGRG00000000197(EPHA3),ENSBGRG00000000213(NFE2L2),ENSBGRG00000000237(AGPS),ENSBGRG00000000283(HP1BP3),ENSBGRG00000000341(RBM45),ENSBGRG00000000428(ATR),ENSBGRG00000000440(PYM1),ENSBGRG00000000542(CRTC1),ENSBGRG00000000593(PRKAA2),ENSBGRG00000000682(CECR2),ENSBGRG00000000726(PPIE),ENSBGRG00000000764(CDKN1B),ENSBGRG00000000785(DDX39A),ENSBGRG00000000867(IKZF4),ENSBGRG00…	4.84e-06	0.000517086		ko04530	Tight junction	Cellular Processes	Cellular community - eukaryotes	20	148	ENSBGRG00000010170,ENSBGRG00000024118(JAM3),ENSBGRG00000019559(LLGL2),ENSBGRG00000013226(PPP2R2C),ENSBGRG00000001452(TUBA1B),ENSBGRG00000001150(PRKAG1),ENSBGRG00000002536(EPB41L4B),ENSBGRG00000010502,ENSBGRG00000000593(PRKAA2),ENSBGRG00000023559(PRKACA),ENSBGRG00000009912(PPP2R1B),ENSBGRG00000001167(PRKACB),ENSBGRG00000010942(PRKAB2),ENSBGRG00000016630(PRKAB1),ENSBGRG00000013814(STK11),ENSBGRG000…	0.0292103	0.565283		MF	GO:0005085	guanyl-nucleotide exchange factor activity	12	294	0.000141373	0.0130063	ENSBGRG00000000973(FGD6),ENSBGRG00000001896(DENND4C),ENSBGRG00000003783(SPTB),ENSBGRG00000004086(DENND5B),ENSBGRG00000007364(DENND2B),ENSBGRG00000013023(RAPGEF1),ENSBGRG00000015284(SPTBN1),ENSBGRG00000016018(ABR),ENSBGRG00000017494(DOCK11),ENSBGRG00000018618(DOCK7),ENSBGRG00000022862(DOCK9),ENSBGRG00000024953(DENND4A)		bgr00380	Tryptophan metabolism	Metabolism	Amino acid metabolism	1	51	0.393326	0.491658	ENSBGRG00000019382(ASMT)	http://www.kegg.jp/kegg-bin/show_pathway?map=map00380&multi_query=K00543+%23FFFFFF,red%0d%0a
BP	GO:0031325	positive regulation of cellular metabolic process	252	2182	ENSBGRG00000000061(GABPA),ENSBGRG00000000213(NFE2L2),ENSBGRG00000000221(F3),ENSBGRG00000000405(MFSD2A),ENSBGRG00000000440(PYM1),ENSBGRG00000000461(NR4A3),ENSBGRG00000000542(CRTC1),ENSBGRG00000000593(PRKAA2),ENSBGRG00000000770(ECE1),ENSBGRG00000000867(IKZF4),ENSBGRG00000000977(CERS1),ENSBGRG00000001004(VDAC1),ENSBGRG00000001078(WNT10B),ENSBGRG00000001111(C9orf72),ENSBGRG00000001178(SGTA),ENSBGRG00…	4.96e-06	0.00515654		ko04213	Longevity regulating pathway - multiple species	Organismal Systems	Aging	9	52	ENSBGRG00000007174(FOXO3),ENSBGRG00000016630(PRKAB1),ENSBGRG00000010942(PRKAB2),ENSBGRG00000006927(FOXA2),ENSBGRG00000000593(PRKAA2),ENSBGRG00000000673(ADCY6),ENSBGRG00000001167(PRKACB),ENSBGRG00000023559(PRKACA),ENSBGRG00000001150(PRKAG1)	0.0323395	0.565283		BP	GO:0042998	positive regulation of Golgi to plasma membrane protein transport	3	10	0.000155648	0.0656836	ENSBGRG00000001896(DENND4C),ENSBGRG00000016568(ACSL3),ENSBGRG00000024953(DENND4A)		bgr00010	Glycolysis / Gluconeogenesis	Metabolism	Carbohydrate metabolism	1	66	0.477658	0.530732	ENSBGRG00000000599(ENSBGRG00000000599)	http://www.kegg.jp/kegg-bin/show_pathway?map=map00010&multi_query=K01623+%23FFFFFF,red%0d%0a
BP	GO:0080090	regulation of primary metabolic process	410	3819	ENSBGRG00000000004(VGLL3),ENSBGRG00000000061(GABPA),ENSBGRG00000000213(NFE2L2),ENSBGRG00000000221(F3),ENSBGRG00000000235,ENSBGRG00000000283(HP1BP3),ENSBGRG00000000285(CIART),ENSBGRG00000000405(MFSD2A),ENSBGRG00000000440(PYM1),ENSBGRG00000000461(NR4A3),ENSBGRG00000000535,ENSBGRG00000000542(CRTC1),ENSBGRG00000000593(PRKAA2),ENSBGRG00000000726(PPIE),ENSBGRG00000000764(CDKN1B),ENSBGRG00000000867(IKZF…	5.64e-06	0.00515654		ko04922	Glucagon signaling pathway	Organismal Systems	Endocrine system	13	87	ENSBGRG00000001150(PRKAG1),ENSBGRG00000021420(CAMK2A),ENSBGRG00000002633(PPP3CA),ENSBGRG00000000593(PRKAA2),ENSBGRG00000023559(PRKACA),ENSBGRG00000001167(PRKACB),ENSBGRG00000018551(PPP4R3B),ENSBGRG00000010942(PRKAB2),ENSBGRG00000016630(PRKAB1),ENSBGRG00000004498(PFKP),ENSBGRG00000014262(PPARGC1A),ENSBGRG00000014792(ACACA),ENSBGRG00000004485(G6PC3)	0.0351661	0.565283		CC	GO:0005622	intracellular	160	13207	0.000202129	0.0970218	ENSBGRG00000000139(SON),ENSBGRG00000000262(BOLL),ENSBGRG00000000266(PROS1),ENSBGRG00000000599(ENSBGRG00000000599),ENSBGRG00000000629(GNPTAB),ENSBGRG00000000973(FGD6),ENSBGRG00000001023(TBXAS1),ENSBGRG00000001141(ABCA1),ENSBGRG00000001484(SEC24B),ENSBGRG00000001728(ITPR2),ENSBGRG00000001761(IFRD1),ENSBGRG00000001896(DENND4C),ENSBGRG00000002158(HMBOX1),ENSBGRG00000002321(FBXO42),ENSBGRG00000002518(…		bgr00561	Glycerolipid metabolism	Metabolism	Lipid metabolism	1	66	0.477658	0.530732	ENSBGRG00000005383(DGKH)	http://www.kegg.jp/kegg-bin/show_pathway?map=map00561&multi_query=K00901+%23FFFFFF,red%0d%0a
CC	GO:0005654	nucleoplasm	300	2688	ENSBGRG00000000061(GABPA),ENSBGRG00000000197(EPHA3),ENSBGRG00000000213(NFE2L2),ENSBGRG00000000283(HP1BP3),ENSBGRG00000000341(RBM45),ENSBGRG00000000428(ATR),ENSBGRG00000000440(PYM1),ENSBGRG00000000542(CRTC1),ENSBGRG00000000593(PRKAA2),ENSBGRG00000000726(PPIE),ENSBGRG00000000764(CDKN1B),ENSBGRG00000000785(DDX39A),ENSBGRG00000000867(IKZF4),ENSBGRG00000000920(ZRANB3),ENSBGRG00000001129(HEMGN),ENSBGRG…	6.14e-06	0.000583665		ko05206	MicroRNAs in cancer	Human Diseases	Cancer: overview	19	142	ENSBGRG00000000764(CDKN1B),ENSBGRG00000016979(HOXD10),ENSBGRG00000017874(FSCN1),ENSBGRG00000023016(MAPK7),ENSBGRG00000004279(DNMT3B),ENSBGRG00000018786(PTGS2),ENSBGRG00000012532(MMP16),ENSBGRG00000004717(ITGA5),ENSBGRG00000006751(SLC7A1),ENSBGRG00000003979,ENSBGRG00000019275(PLCG2),ENSBGRG00000017884(PDCD4),ENSBGRG00000017354(BMPR2),ENSBGRG00000014113(ATM),ENSBGRG00000000962(MCL1),ENSBGRG00000017…	0.036036	0.565283		BP	GO:1903078	positive regulation of protein localization to plasma membrane	6	76	0.000205172	0.0787114	ENSBGRG00000001896(DENND4C),ENSBGRG00000009140(PRKCH),ENSBGRG00000015284(SPTBN1),ENSBGRG00000016568(ACSL3),ENSBGRG00000020056(DLG1),ENSBGRG00000024953(DENND4A)		bgr03018	RNA degradation	Genetic Information Processing	Folding, sorting and degradation	1	80	0.546272	0.575023	ENSBGRG00000022289(MTREX)	http://www.kegg.jp/kegg-bin/show_pathway?map=map03018&multi_query=K12598+%23FFFFFF,red%0d%0a
BP	GO:0019222	regulation of metabolic process	464	4399	ENSBGRG00000000004(VGLL3),ENSBGRG00000000061(GABPA),ENSBGRG00000000213(NFE2L2),ENSBGRG00000000215(PLCL2),ENSBGRG00000000221(F3),ENSBGRG00000000235,ENSBGRG00000000283(HP1BP3),ENSBGRG00000000285(CIART),ENSBGRG00000000405(MFSD2A),ENSBGRG00000000428(ATR),ENSBGRG00000000440(PYM1),ENSBGRG00000000461(NR4A3),ENSBGRG00000000535,ENSBGRG00000000542(CRTC1),ENSBGRG00000000571(DRAM1),ENSBGRG00000000593(PRKAA2)…	6.55e-06	0.00532315		ko04360	Axon guidance	Organismal Systems	Development and regeneration	21	161	ENSBGRG00000000017(ROBO2),ENSBGRG00000005672(SRC),ENSBGRG00000026803(SEMA4C),ENSBGRG00000010683(NEO1),ENSBGRG00000016154(NTN3),ENSBGRG00000011285(PAK5),ENSBGRG00000003000(RASA1),ENSBGRG00000021584(UNC5D),ENSBGRG00000017354(BMPR2),ENSBGRG00000012573(NCK2),ENSBGRG00000000197(EPHA3),ENSBGRG00000019275(PLCG2),ENSBGRG00000019557(WNT5B),ENSBGRG00000024327(PLXNA2),ENSBGRG00000021420(CAMK2A),ENSBGRG00000…	0.0364391	0.565283		BP	GO:0009653	anatomical structure morphogenesis	65	3914	0.000231568	0.0814347	ENSBGRG00000000629(GNPTAB),ENSBGRG00000000973(FGD6),ENSBGRG00000001761(IFRD1),ENSBGRG00000002518(DDR2),ENSBGRG00000002824(USP33),ENSBGRG00000003783(SPTB),ENSBGRG00000003960(ENAH),ENSBGRG00000004149(PTBP3),ENSBGRG00000004626(CBLB),ENSBGRG00000005231(NIBAN2),ENSBGRG00000005379(ATG5),ENSBGRG00000005984(CSNK1D),ENSBGRG00000006060(IGF1R),ENSBGRG00000006248(PIKFYVE),ENSBGRG00000007598(ZRANB1),ENSBGRG00…		bgr00190	Oxidative phosphorylation	Metabolism	Energy metabolism	1	185	0.84788	0.84788	ENSBGRG00000007817(ATP6V1C1)	http://www.kegg.jp/kegg-bin/show_pathway?map=map00190&multi_query=K02148+%23FFFFFF,red%0d%0a
BP	GO:0051171	regulation of nitrogen compound metabolic process	400	3725	ENSBGRG00000000004(VGLL3),ENSBGRG00000000061(GABPA),ENSBGRG00000000213(NFE2L2),ENSBGRG00000000221(F3),ENSBGRG00000000235,ENSBGRG00000000283(HP1BP3),ENSBGRG00000000285(CIART),ENSBGRG00000000405(MFSD2A),ENSBGRG00000000440(PYM1),ENSBGRG00000000461(NR4A3),ENSBGRG00000000535,ENSBGRG00000000542(CRTC1),ENSBGRG00000000593(PRKAA2),ENSBGRG00000000726(PPIE),ENSBGRG00000000764(CDKN1B),ENSBGRG00000000867(IKZF…	7.82e-06	0.00572005		ko04934	Cushing syndrome	Human Diseases	Endocrine and metabolic disease	18	134	ENSBGRG00000020100(RB1),ENSBGRG00000007753(CACNA1G),ENSBGRG00000021420(CAMK2A),ENSBGRG00000012559(DVL1),ENSBGRG00000019557(WNT5B),ENSBGRG00000007688(FZD6),ENSBGRG00000001167(PRKACB),ENSBGRG00000023559(PRKACA),ENSBGRG00000000673(ADCY6),ENSBGRG00000005861(LDLR),ENSBGRG00000003789(NCEH1),ENSBGRG00000001078(WNT10B),ENSBGRG00000007727(CDKN2C),ENSBGRG00000019305(ARMC5),ENSBGRG00000012214(SCARB1),ENSBGR…	0.0392067	0.565283		MF	GO:0043492	ATPase activity, coupled to movement of substances	8	144	0.000245834	0.0188844	ENSBGRG00000001141(ABCA1),ENSBGRG00000007817(ATP6V1C1),ENSBGRG00000010412(ATP2A2),ENSBGRG00000011855(ATP8B1),ENSBGRG00000012550(ATP8B4),ENSBGRG00000014876(ATP7B),ENSBGRG00000020672(ABCG2),ENSBGRG00000023586(ABCC1)
CC	GO:0043229	intracellular organelle	771	7874	ENSBGRG00000000004(VGLL3),ENSBGRG00000000061(GABPA),ENSBGRG00000000074(N6AMT1),ENSBGRG00000000082(GRIK1),ENSBGRG00000000197(EPHA3),ENSBGRG00000000203(DDOST),ENSBGRG00000000213(NFE2L2),ENSBGRG00000000237(AGPS),ENSBGRG00000000283(HP1BP3),ENSBGRG00000000285(CIART),ENSBGRG00000000341(RBM45),ENSBGRG00000000428(ATR),ENSBGRG00000000440(PYM1),ENSBGRG00000000461(NR4A3),ENSBGRG00000000535,ENSBGRG0000000054…	1.05e-05	0.000897978		ko00290	Valine, leucine and isoleucine biosynthesis	Metabolism	Amino acid metabolism	2	4	ENSBGRG00000019779(BCAT2),ENSBGRG00000001086	0.0397659	0.565283		BP	GO:0009791	post-embryonic development	26	1110	0.000260084	0.0821804	ENSBGRG00000002693(APBB2),ENSBGRG00000004149(PTBP3),ENSBGRG00000004626(CBLB),ENSBGRG00000005379(ATG5),ENSBGRG00000005984(CSNK1D),ENSBGRG00000006060(IGF1R),ENSBGRG00000007061(RRAS2),ENSBGRG00000008227(UBR5),ENSBGRG00000009140(PRKCH),ENSBGRG00000010412(ATP2A2),ENSBGRG00000010459(CDK19),ENSBGRG00000011253(EHMT1),ENSBGRG00000012411(LRBA),ENSBGRG00000012463(RERE),ENSBGRG00000014876(ATP7B),ENSBGRG00000…
BP	GO:0032502	developmental process	407	3813	ENSBGRG00000000061(GABPA),ENSBGRG00000000174,ENSBGRG00000000197(EPHA3),ENSBGRG00000000213(NFE2L2),ENSBGRG00000000215(PLCL2),ENSBGRG00000000221(F3),ENSBGRG00000000276(HERPUD2),ENSBGRG00000000405(MFSD2A),ENSBGRG00000000428(ATR),ENSBGRG00000000520(DPYSL2),ENSBGRG00000000682(CECR2),ENSBGRG00000000764(CDKN1B),ENSBGRG00000000770(ECE1),ENSBGRG00000000798(GABRG2),ENSBGRG00000000909(FSTL4),ENSBGRG00000000…	1.15e-05	0.00651162		ko04657	IL-17 signaling pathway	Organismal Systems	Immune system	12	80	ENSBGRG00000002683(IL13),ENSBGRG00000015169(SRSF1),ENSBGRG00000018786(PTGS2),ENSBGRG00000018711(MMP3),ENSBGRG00000022326(TRAF5),ENSBGRG00000023016(MAPK7),ENSBGRG00000021331,ENSBGRG00000021362,ENSBGRG00000020779(CSF3),ENSBGRG00000019180(IL17B),ENSBGRG00000022164(FOSB),ENSBGRG00000010021(CCL20)	0.0408901	0.565283		MF	GO:0005524	ATP binding	13	362	0.000263912	0.0188844	ENSBGRG00000001141(ABCA1),ENSBGRG00000006051(CDC42BPA),ENSBGRG00000006060(IGF1R),ENSBGRG00000008351(MYH7),ENSBGRG00000008463(TLK1),ENSBGRG00000010412(ATP2A2),ENSBGRG00000011586(ERCC6),ENSBGRG00000014876(ATP7B),ENSBGRG00000015847(PDS5B),ENSBGRG00000020282(SMARCA5),ENSBGRG00000020672(ABCG2),ENSBGRG00000022891(RAF1),ENSBGRG00000023586(ABCC1)
BP	GO:0010628	positive regulation of gene expression	191	1600	ENSBGRG00000000061(GABPA),ENSBGRG00000000213(NFE2L2),ENSBGRG00000000221(F3),ENSBGRG00000000440(PYM1),ENSBGRG00000000461(NR4A3),ENSBGRG00000000542(CRTC1),ENSBGRG00000000867(IKZF4),ENSBGRG00000001078(WNT10B),ENSBGRG00000001150(PRKAG1),ENSBGRG00000001789(STAT1),ENSBGRG00000001845(KAT2B),ENSBGRG00000001892(ING5),ENSBGRG00000001895(ZBTB20),ENSBGRG00000001954(ZNF395),ENSBGRG00000002070(GLIS1),ENSBGRG00…	1.26e-05	0.00651162		ko01040	Biosynthesis of unsaturated fatty acids	Metabolism	Lipid metabolism	5	23	ENSBGRG00000023293(SCD5),ENSBGRG00000004114(ELOVL4),ENSBGRG00000019509(ELOVL5),ENSBGRG00000025307(HACD3),ENSBGRG00000001005(TECR)	0.0431911	0.565283		MF	GO:0032559	adenyl ribonucleotide binding	14	424	0.000360511	0.0232169	ENSBGRG00000001141(ABCA1),ENSBGRG00000006051(CDC42BPA),ENSBGRG00000006060(IGF1R),ENSBGRG00000008351(MYH7),ENSBGRG00000008463(TLK1),ENSBGRG00000010412(ATP2A2),ENSBGRG00000011586(ERCC6),ENSBGRG00000014876(ATP7B),ENSBGRG00000015847(PDS5B),ENSBGRG00000020282(SMARCA5),ENSBGRG00000020672(ABCG2),ENSBGRG00000022891(RAF1),ENSBGRG00000023586(ABCC1),ENSBGRG00000026591(ENSBGRG00000026591)
BP	GO:0140353	lipid export from cell	10	23	ENSBGRG00000008588(REN),ENSBGRG00000010102(P2RX7),ENSBGRG00000013000(NOS2),ENSBGRG00000015409(CRY1),ENSBGRG00000018786(PTGS2),ENSBGRG00000019832(C1QTNF1),ENSBGRG00000020407(SPP1),ENSBGRG00000023249(LEP),ENSBGRG00000023482(GALR1),ENSBGRG00000025055(SELENOM)	1.26e-05	0.00651162		ko03015	mRNA surveillance pathway	Genetic Information Processing	Translation	13	90	ENSBGRG00000012707,ENSBGRG00000000440(PYM1),ENSBGRG00000017504(HBS1L),ENSBGRG00000018087(CSTF2T),ENSBGRG00000013226(PPP2R2C),ENSBGRG00000012808(SMG7),ENSBGRG00000014538(PABPC1L),ENSBGRG00000006713(PAPOLG),ENSBGRG00000019603(SYMPK),ENSBGRG00000022186(NXT2),ENSBGRG00000019513(NCBP2),ENSBGRG00000022802(FUS),ENSBGRG00000009912(PPP2R1B)	0.0446284	0.565283		BP	GO:0014728	regulation of the force of skeletal muscle contraction	2	3	0.000370203	0.0821804	ENSBGRG00000007922(MYH6),ENSBGRG00000008351(MYH7)
CC	GO:0005634	nucleus	452	4319	ENSBGRG00000000004(VGLL3),ENSBGRG00000000061(GABPA),ENSBGRG00000000074(N6AMT1),ENSBGRG00000000197(EPHA3),ENSBGRG00000000213(NFE2L2),ENSBGRG00000000237(AGPS),ENSBGRG00000000283(HP1BP3),ENSBGRG00000000285(CIART),ENSBGRG00000000341(RBM45),ENSBGRG00000000428(ATR),ENSBGRG00000000440(PYM1),ENSBGRG00000000461(NR4A3),ENSBGRG00000000535,ENSBGRG00000000542(CRTC1),ENSBGRG00000000593(PRKAA2),ENSBGRG000000006…	1.29e-05	0.000999878		ko04640	Hematopoietic cell lineage	Organismal Systems	Immune system	13	91	ENSBGRG00000014754,ENSBGRG00000018381,ENSBGRG00000022452,ENSBGRG00000020517(CD44),ENSBGRG00000020779(CSF3),ENSBGRG00000010502,ENSBGRG00000023528(IL11),ENSBGRG00000010970(ITGA6),ENSBGRG00000004717(ITGA5),ENSBGRG00000020676(CSF1R),ENSBGRG00000024571,ENSBGRG00000005369(FLT3),ENSBGRG00000009260	0.0481434	0.565283		BP	GO:0014862	regulation of skeletal muscle contraction by chemo-mechanical energy conversion	2	3	0.000370203	0.0821804	ENSBGRG00000007922(MYH6),ENSBGRG00000008351(MYH7)
BP	GO:0009893	positive regulation of metabolic process	283	2525	ENSBGRG00000000061(GABPA),ENSBGRG00000000213(NFE2L2),ENSBGRG00000000221(F3),ENSBGRG00000000405(MFSD2A),ENSBGRG00000000440(PYM1),ENSBGRG00000000461(NR4A3),ENSBGRG00000000542(CRTC1),ENSBGRG00000000593(PRKAA2),ENSBGRG00000000764(CDKN1B),ENSBGRG00000000770(ECE1),ENSBGRG00000000867(IKZF4),ENSBGRG00000000977(CERS1),ENSBGRG00000001004(VDAC1),ENSBGRG00000001078(WNT10B),ENSBGRG00000001111(C9orf72),ENSBGRG…	1.29e-05	0.00651162		ko04936	Alcoholic liver disease	Human Diseases	Endocrine and metabolic disease	17	128	ENSBGRG00000017283(FAS),ENSBGRG00000014792(ACACA),ENSBGRG00000000593(PRKAA2),ENSBGRG00000007038(FASLG),ENSBGRG00000017832(CYP2E1),ENSBGRG00000001150(PRKAG1),ENSBGRG00000009042(RIPK1),ENSBGRG00000014262(PPARGC1A),ENSBGRG00000003430(C1QC),ENSBGRG00000018041(MLYCD),ENSBGRG00000023293(SCD5),ENSBGRG00000006318,ENSBGRG00000016956(IL12B),ENSBGRG00000010942(PRKAB2),ENSBGRG00000016630(PRKAB1),ENSBGRG00000…	0.0484242	0.565283		BP	GO:0031449	regulation of slow-twitch skeletal muscle fiber contraction	2	3	0.000370203	0.0821804	ENSBGRG00000007922(MYH6),ENSBGRG00000008351(MYH7)
BP	GO:0009653	anatomical structure morphogenesis	203	1720	ENSBGRG00000000061(GABPA),ENSBGRG00000000221(F3),ENSBGRG00000000405(MFSD2A),ENSBGRG00000000520(DPYSL2),ENSBGRG00000000682(CECR2),ENSBGRG00000000770(ECE1),ENSBGRG00000000909(FSTL4),ENSBGRG00000001078(WNT10B),ENSBGRG00000001111(C9orf72),ENSBGRG00000001167(PRKACB),ENSBGRG00000001195(SP8),ENSBGRG00000001621(AQP3),ENSBGRG00000001761(IFRD1),ENSBGRG00000001789(STAT1),ENSBGRG00000001905(TBCCD1),ENSBGRG00…	1.34e-05	0.00651162		ko04060	Cytokine-cytokine receptor interaction	Environmental Information Processing	Signaling molecules and interaction	31	265	ENSBGRG00000020605(IL26),ENSBGRG00000017283(FAS),ENSBGRG00000020779(CSF3),ENSBGRG00000002374(IL9),ENSBGRG00000010067(GDF11),ENSBGRG00000024470(BMP3),ENSBGRG00000010021(CCL20),ENSBGRG00000004989(ACVR2A),ENSBGRG00000011349(CNTF),ENSBGRG00000023528(IL11),ENSBGRG00000021331,ENSBGRG00000017354(BMPR2),ENSBGRG00000021362,ENSBGRG00000007038(FASLG),ENSBGRG00000014317,ENSBGRG00000019180(IL17B),ENSBGRG00000…	0.0497014	0.565283		BP	GO:1903943	regulation of hepatocyte apoptotic process	2	3	0.000370203	0.0821804	ENSBGRG00000006060(IGF1R),ENSBGRG00000022578(CFLAR)
BP	GO:0048856	anatomical structure development	380	3537	ENSBGRG00000000061(GABPA),ENSBGRG00000000174,ENSBGRG00000000197(EPHA3),ENSBGRG00000000213(NFE2L2),ENSBGRG00000000215(PLCL2),ENSBGRG00000000221(F3),ENSBGRG00000000405(MFSD2A),ENSBGRG00000000520(DPYSL2),ENSBGRG00000000682(CECR2),ENSBGRG00000000764(CDKN1B),ENSBGRG00000000770(ECE1),ENSBGRG00000000798(GABRG2),ENSBGRG00000000909(FSTL4),ENSBGRG00000000918(STK36),ENSBGRG00000001004(VDAC1),ENSBGRG00000001…	1.48e-05	0.00661627		ko00062	Fatty acid elongation	Metabolism	Lipid metabolism	5	24	ENSBGRG00000019509(ELOVL5),ENSBGRG00000004114(ELOVL4),ENSBGRG00000025307(HACD3),ENSBGRG00000001005(TECR),ENSBGRG00000006801(HADH)	0.0508251	0.565283		BP	GO:1903944	negative regulation of hepatocyte apoptotic process	2	3	0.000370203	0.0821804	ENSBGRG00000006060(IGF1R),ENSBGRG00000022578(CFLAR)
BP	GO:0060255	regulation of macromolecule metabolic process	433	4100	ENSBGRG00000000004(VGLL3),ENSBGRG00000000061(GABPA),ENSBGRG00000000213(NFE2L2),ENSBGRG00000000221(F3),ENSBGRG00000000235,ENSBGRG00000000283(HP1BP3),ENSBGRG00000000285(CIART),ENSBGRG00000000428(ATR),ENSBGRG00000000440(PYM1),ENSBGRG00000000461(NR4A3),ENSBGRG00000000535,ENSBGRG00000000542(CRTC1),ENSBGRG00000000593(PRKAA2),ENSBGRG00000000726(PPIE),ENSBGRG00000000764(CDKN1B),ENSBGRG00000000770(ECE1),E…	1.54e-05	0.00661627		ko05110	Vibrio cholerae infection	Human Diseases	Infectious disease: bacterial	8	48	ENSBGRG00000005559(ATP6V1B1),ENSBGRG00000001479(ATP6V1A),ENSBGRG00000009889(ATP6V0A1),ENSBGRG00000019275(PLCG2),ENSBGRG00000021211,ENSBGRG00000001167(PRKACB),ENSBGRG00000023559(PRKACA),ENSBGRG00000024848	0.0513894	0.565283		BP	GO:0044093	positive regulation of molecular function	37	1875	0.000378187	0.0821804	ENSBGRG00000000599(ENSBGRG00000000599),ENSBGRG00000001761(IFRD1),ENSBGRG00000001896(DENND4C),ENSBGRG00000002158(HMBOX1),ENSBGRG00000002518(DDR2),ENSBGRG00000002824(USP33),ENSBGRG00000004274(RABGAP1L),ENSBGRG00000004575(SERINC5),ENSBGRG00000005231(NIBAN2),ENSBGRG00000005343(ENSBGRG00000005343),ENSBGRG00000008391(PRRC1),ENSBGRG00000008463(TLK1),ENSBGRG00000009140(PRKCH),ENSBGRG00000009644(PPP1R9A),…
MF	GO:0043565	sequence-specific DNA binding	114	891	ENSBGRG00000000061(GABPA),ENSBGRG00000000213(NFE2L2),ENSBGRG00000000235,ENSBGRG00000000285(CIART),ENSBGRG00000000461(NR4A3),ENSBGRG00000000867(IKZF4),ENSBGRG00000001195(SP8),ENSBGRG00000001424(LONP1),ENSBGRG00000001485(NFX1),ENSBGRG00000001789(STAT1),ENSBGRG00000001845(KAT2B),ENSBGRG00000001895(ZBTB20),ENSBGRG00000001901(FOXP2),ENSBGRG00000001954(ZNF395),ENSBGRG00000002039(HOXA6),ENSBGRG000000020…	2.09e-05	0.0101743		ko04341	Hedgehog signaling pathway - fly	Environmental Information Processing	Signal transduction	6	32	ENSBGRG00000001167(PRKACB),ENSBGRG00000023559(PRKACA),ENSBGRG00000000918(STK36),ENSBGRG00000013724(GRK4),ENSBGRG00000009467(CSNK1G3),ENSBGRG00000022727(HHAT)	0.0531731	0.566036		BP	GO:1904377	positive regulation of protein localization to cell periphery	6	86	0.000402474	0.0821804	ENSBGRG00000001896(DENND4C),ENSBGRG00000009140(PRKCH),ENSBGRG00000015284(SPTBN1),ENSBGRG00000016568(ACSL3),ENSBGRG00000020056(DLG1),ENSBGRG00000024953(DENND4A)
BP	GO:0051173	positive regulation of nitrogen compound metabolic process	237	2074	ENSBGRG00000000061(GABPA),ENSBGRG00000000213(NFE2L2),ENSBGRG00000000221(F3),ENSBGRG00000000440(PYM1),ENSBGRG00000000461(NR4A3),ENSBGRG00000000542(CRTC1),ENSBGRG00000000593(PRKAA2),ENSBGRG00000000764(CDKN1B),ENSBGRG00000000867(IKZF4),ENSBGRG00000001078(WNT10B),ENSBGRG00000001178(SGTA),ENSBGRG00000001789(STAT1),ENSBGRG00000001845(KAT2B),ENSBGRG00000001892(ING5),ENSBGRG00000001895(ZBTB20),ENSBGRG000…	2.2e-05	0.00839964		ko01524	Platinum drug resistance	Human Diseases	Drug resistance: antineoplastic	10	66	ENSBGRG00000010489(TOP2B),ENSBGRG00000014876(ATP7B),ENSBGRG00000014113(ATM),ENSBGRG00000003295(MGST3),ENSBGRG00000016285,ENSBGRG00000002112(GSTM3),ENSBGRG00000002079,ENSBGRG00000017283(FAS),ENSBGRG00000022014,ENSBGRG00000007038(FASLG)	0.0555317	0.570997		BP	GO:0065007	biological regulation	150	11754	0.000408955	0.0821804	ENSBGRG00000000139(SON),ENSBGRG00000000262(BOLL),ENSBGRG00000000266(PROS1),ENSBGRG00000000599(ENSBGRG00000000599),ENSBGRG00000000973(FGD6),ENSBGRG00000001023(TBXAS1),ENSBGRG00000001141(ABCA1),ENSBGRG00000001728(ITPR2),ENSBGRG00000001761(IFRD1),ENSBGRG00000001896(DENND4C),ENSBGRG00000002023(ZNF596),ENSBGRG00000002158(HMBOX1),ENSBGRG00000002518(DDR2),ENSBGRG00000002693(APBB2),ENSBGRG00000002824(USP…
BP	GO:0010604	positive regulation of macromolecule metabolic process	264	2349	ENSBGRG00000000061(GABPA),ENSBGRG00000000213(NFE2L2),ENSBGRG00000000221(F3),ENSBGRG00000000440(PYM1),ENSBGRG00000000461(NR4A3),ENSBGRG00000000542(CRTC1),ENSBGRG00000000593(PRKAA2),ENSBGRG00000000764(CDKN1B),ENSBGRG00000000770(ECE1),ENSBGRG00000000867(IKZF4),ENSBGRG00000001078(WNT10B),ENSBGRG00000001150(PRKAG1),ENSBGRG00000001178(SGTA),ENSBGRG00000001789(STAT1),ENSBGRG00000001845(KAT2B),ENSBGRG000…	2.28e-05	0.00839964		ko05205	Proteoglycans in cancer	Human Diseases	Cancer: overview	22	179	ENSBGRG00000016979(HOXD10),ENSBGRG00000002134(CAV1),ENSBGRG00000005672(SRC),ENSBGRG00000004554(VAV2),ENSBGRG00000001078(WNT10B),ENSBGRG00000016956(IL12B),ENSBGRG00000010536(FGF2),ENSBGRG00000004717(ITGA5),ENSBGRG00000021306(HPSE2),ENSBGRG00000021420(CAMK2A),ENSBGRG00000002309(LUM),ENSBGRG00000019557(WNT5B),ENSBGRG00000020517(CD44),ENSBGRG00000007688(FZD6),ENSBGRG00000017283(FAS),ENSBGRG0000002355…	0.0573603	0.570997		BP	GO:0032502	developmental process	110	7848	0.000445309	0.0854184	ENSBGRG00000000262(BOLL),ENSBGRG00000000266(PROS1),ENSBGRG00000000599(ENSBGRG00000000599),ENSBGRG00000000629(GNPTAB),ENSBGRG00000000973(FGD6),ENSBGRG00000001141(ABCA1),ENSBGRG00000001761(IFRD1),ENSBGRG00000002518(DDR2),ENSBGRG00000002693(APBB2),ENSBGRG00000002824(USP33),ENSBGRG00000002944(TOMM70),ENSBGRG00000003322(WDR33),ENSBGRG00000003783(SPTB),ENSBGRG00000003960(ENAH),ENSBGRG00000004086(DENND5…
BP	GO:0010468	regulation of gene expression	341	3144	ENSBGRG00000000004(VGLL3),ENSBGRG00000000061(GABPA),ENSBGRG00000000213(NFE2L2),ENSBGRG00000000221(F3),ENSBGRG00000000235,ENSBGRG00000000283(HP1BP3),ENSBGRG00000000285(CIART),ENSBGRG00000000440(PYM1),ENSBGRG00000000461(NR4A3),ENSBGRG00000000535,ENSBGRG00000000542(CRTC1),ENSBGRG00000000593(PRKAA2),ENSBGRG00000000726(PPIE),ENSBGRG00000000764(CDKN1B),ENSBGRG00000000867(IKZF4),ENSBGRG00000000918(STK36…	2.3e-05	0.00839964		ko00982	Drug metabolism - cytochrome P450	Metabolism	Xenobiotics biodegradation and metabolism	7	41	ENSBGRG00000017832(CYP2E1),ENSBGRG00000002112(GSTM3),ENSBGRG00000002079,ENSBGRG00000003295(MGST3),ENSBGRG00000011055,ENSBGRG00000013578,ENSBGRG00000022014	0.0593192	0.570997		MF	GO:0030554	adenyl nucleotide binding	14	436	0.000476553	0.0247321	ENSBGRG00000001141(ABCA1),ENSBGRG00000006051(CDC42BPA),ENSBGRG00000006060(IGF1R),ENSBGRG00000008351(MYH7),ENSBGRG00000008463(TLK1),ENSBGRG00000010412(ATP2A2),ENSBGRG00000011586(ERCC6),ENSBGRG00000014876(ATP7B),ENSBGRG00000015847(PDS5B),ENSBGRG00000020282(SMARCA5),ENSBGRG00000020672(ABCG2),ENSBGRG00000022891(RAF1),ENSBGRG00000023586(ABCC1),ENSBGRG00000026591(ENSBGRG00000026591)
CC	GO:0043226	organelle	795	8185	ENSBGRG00000000004(VGLL3),ENSBGRG00000000061(GABPA),ENSBGRG00000000074(N6AMT1),ENSBGRG00000000082(GRIK1),ENSBGRG00000000197(EPHA3),ENSBGRG00000000203(DDOST),ENSBGRG00000000213(NFE2L2),ENSBGRG00000000237(AGPS),ENSBGRG00000000283(HP1BP3),ENSBGRG00000000285(CIART),ENSBGRG00000000341(RBM45),ENSBGRG00000000428(ATR),ENSBGRG00000000440(PYM1),ENSBGRG00000000461(NR4A3),ENSBGRG00000000535,ENSBGRG0000000054…	2.37e-05	0.00169016		ko04913	Ovarian steroidogenesis	Organismal Systems	Endocrine system	7	42	ENSBGRG00000005861(LDLR),ENSBGRG00000021837(CGA),ENSBGRG00000018786(PTGS2),ENSBGRG00000000673(ADCY6),ENSBGRG00000023559(PRKACA),ENSBGRG00000001167(PRKACB),ENSBGRG00000012214(SCARB1)	0.06613	0.570997		BP	GO:0035023	regulation of Rho protein signal transduction	6	89	0.000483934	0.0887914	ENSBGRG00000001141(ABCA1),ENSBGRG00000016018(ABR),ENSBGRG00000017494(DOCK11),ENSBGRG00000018618(DOCK7),ENSBGRG00000022862(DOCK9),ENSBGRG00000022891(RAF1)
CC	GO:0005829	cytosol	257	2295	ENSBGRG00000000197(EPHA3),ENSBGRG00000000213(NFE2L2),ENSBGRG00000000440(PYM1),ENSBGRG00000000520(DPYSL2),ENSBGRG00000000542(CRTC1),ENSBGRG00000000587(GPSM2),ENSBGRG00000000711(METAP2),ENSBGRG00000000726(PPIE),ENSBGRG00000000764(CDKN1B),ENSBGRG00000000918(STK36),ENSBGRG00000000962(MCL1),ENSBGRG00000001070(ATXN10),ENSBGRG00000001111(C9orf72),ENSBGRG00000001178(SGTA),ENSBGRG00000001266(PSRC1),ENSBGR…	2.94e-05	0.00193661		ko00980	Metabolism of xenobiotics by cytochrome P450	Metabolism	Xenobiotics biodegradation and metabolism	7	42	ENSBGRG00000011055,ENSBGRG00000003295(MGST3),ENSBGRG00000020434(CYP2S1),ENSBGRG00000022014,ENSBGRG00000002079,ENSBGRG00000002112(GSTM3),ENSBGRG00000017832(CYP2E1)	0.06613	0.570997		MF	GO:0016462	pyrophosphatase activity	20	778	0.000557094	0.0247321	ENSBGRG00000001141(ABCA1),ENSBGRG00000004129(PMS1),ENSBGRG00000007061(RRAS2),ENSBGRG00000007817(ATP6V1C1),ENSBGRG00000007922(MYH6),ENSBGRG00000008351(MYH7),ENSBGRG00000010412(ATP2A2),ENSBGRG00000011586(ERCC6),ENSBGRG00000011855(ATP8B1),ENSBGRG00000012114(GFM2),ENSBGRG00000012475(EEFSEC),ENSBGRG00000012550(ATP8B4),ENSBGRG00000014876(ATP7B),ENSBGRG00000014952(AGAP1),ENSBGRG00000018952(TRAK1),ENSBGR…
BP	GO:0018193	peptidyl-amino acid modification	104	788	ENSBGRG00000000074(N6AMT1),ENSBGRG00000000197(EPHA3),ENSBGRG00000000203(DDOST),ENSBGRG00000000428(ATR),ENSBGRG00000000593(PRKAA2),ENSBGRG00000000711(METAP2),ENSBGRG00000000726(PPIE),ENSBGRG00000001845(KAT2B),ENSBGRG00000001892(ING5),ENSBGRG00000002134(CAV1),ENSBGRG00000002796(HDAC10),ENSBGRG00000003668(APOA1),ENSBGRG00000004279(DNMT3B),ENSBGRG00000004372(NTRK2),ENSBGRG00000004717(ITGA5),ENSBGRG00…	3.27e-05	0.0114077		ko05130	Pathogenic Escherichia coli infection	Human Diseases	Infectious disease: bacterial	21	173	ENSBGRG00000004047(MYO1A),ENSBGRG00000009042(RIPK1),ENSBGRG00000022744(PYCARD),ENSBGRG00000026030(TUBB4A),ENSBGRG00000012573(NCK2),ENSBGRG00000017283(FAS),ENSBGRG00000002227(LPAR2),ENSBGRG00000003111(CLDN14),ENSBGRG00000003534(ACTR3),ENSBGRG00000001627(MYO1B),ENSBGRG00000005672(SRC),ENSBGRG00000018451(MYO1G),ENSBGRG00000020569(MYO10),ENSBGRG00000025775(CYTH3),ENSBGRG00000007038(FASLG),ENSBGRG0000…	0.0692146	0.570997		BP	GO:0044087	regulation of cellular component biogenesis	28	1299	0.00056846	0.0935566	ENSBGRG00000001141(ABCA1),ENSBGRG00000003960(ENAH),ENSBGRG00000004749(MYL1),ENSBGRG00000005379(ATG5),ENSBGRG00000005984(CSNK1D),ENSBGRG00000006060(IGF1R),ENSBGRG00000006248(PIKFYVE),ENSBGRG00000008613(ENSBGRG00000008613),ENSBGRG00000009140(PRKCH),ENSBGRG00000009278(TMEM67),ENSBGRG00000009644(PPP1R9A),ENSBGRG00000011309(ARHGAP18),ENSBGRG00000011855(ATP8B1),ENSBGRG00000013584(NOX4),ENSBGRG000000152…
BP	GO:0006357	regulation of transcription by RNA polymerase II	161	1332	ENSBGRG00000000061(GABPA),ENSBGRG00000000213(NFE2L2),ENSBGRG00000000461(NR4A3),ENSBGRG00000000542(CRTC1),ENSBGRG00000000867(IKZF4),ENSBGRG00000001078(WNT10B),ENSBGRG00000001422(RPAP2),ENSBGRG00000001485(NFX1),ENSBGRG00000001789(STAT1),ENSBGRG00000001845(KAT2B),ENSBGRG00000001895(ZBTB20),ENSBGRG00000001954(ZNF395),ENSBGRG00000002070(GLIS1),ENSBGRG00000002072(hoxA10),ENSBGRG00000002134(CAV1),ENSBGR…	3.47e-05	0.0115435		ko00480	Glutathione metabolism	Metabolism	Metabolism of other amino acids	8	51	ENSBGRG00000003295(MGST3),ENSBGRG00000021918(PRDX6),ENSBGRG00000002112(GSTM3),ENSBGRG00000002079,ENSBGRG00000008772(GSS),ENSBGRG00000020079(LAP3),ENSBGRG00000022014,ENSBGRG00000009124(RRM2B)	0.0692901	0.570997		MF	GO:0016817	hydrolase activity, acting on acid anhydrides	20	780	0.000575404	0.0247321	ENSBGRG00000001141(ABCA1),ENSBGRG00000004129(PMS1),ENSBGRG00000007061(RRAS2),ENSBGRG00000007817(ATP6V1C1),ENSBGRG00000007922(MYH6),ENSBGRG00000008351(MYH7),ENSBGRG00000010412(ATP2A2),ENSBGRG00000011586(ERCC6),ENSBGRG00000011855(ATP8B1),ENSBGRG00000012114(GFM2),ENSBGRG00000012475(EEFSEC),ENSBGRG00000012550(ATP8B4),ENSBGRG00000014876(ATP7B),ENSBGRG00000014952(AGAP1),ENSBGRG00000018952(TRAK1),ENSBGR…
BP	GO:0045944	positive regulation of transcription by RNA polymerase II	109	841	ENSBGRG00000000061(GABPA),ENSBGRG00000000213(NFE2L2),ENSBGRG00000000461(NR4A3),ENSBGRG00000000542(CRTC1),ENSBGRG00000000867(IKZF4),ENSBGRG00000001078(WNT10B),ENSBGRG00000001789(STAT1),ENSBGRG00000001845(KAT2B),ENSBGRG00000001954(ZNF395),ENSBGRG00000002070(GLIS1),ENSBGRG00000002309(LUM),ENSBGRG00000002337(ETV5),ENSBGRG00000002538(SMAD5),ENSBGRG00000002594(GLI2),ENSBGRG00000002633(PPP3CA),ENSBGRG00…	4.57e-05	0.0145193		ko05146	Amoebiasis	Human Diseases	Infectious disease: parasitic	12	87	ENSBGRG00000016956(IL12B),ENSBGRG00000013000(NOS2),ENSBGRG00000009260,ENSBGRG00000013027(RAB7A),ENSBGRG00000021026(COL4A6),ENSBGRG00000009568(LAMC3),ENSBGRG00000016632(LAMB2),ENSBGRG00000013466(COL1A2),ENSBGRG00000001167(PRKACB),ENSBGRG00000023559(PRKACA),ENSBGRG00000005405,ENSBGRG00000010502	0.0698759	0.570997		MF	GO:0016818	hydrolase activity, acting on acid anhydrides, in phosphorus-containing anhydrides	20	780	0.000575404	0.0247321	ENSBGRG00000001141(ABCA1),ENSBGRG00000004129(PMS1),ENSBGRG00000007061(RRAS2),ENSBGRG00000007817(ATP6V1C1),ENSBGRG00000007922(MYH6),ENSBGRG00000008351(MYH7),ENSBGRG00000010412(ATP2A2),ENSBGRG00000011586(ERCC6),ENSBGRG00000011855(ATP8B1),ENSBGRG00000012114(GFM2),ENSBGRG00000012475(EEFSEC),ENSBGRG00000012550(ATP8B4),ENSBGRG00000014876(ATP7B),ENSBGRG00000014952(AGAP1),ENSBGRG00000018952(TRAK1),ENSBGR…
BP	GO:0045934	negative regulation of nucleobase-containing compound metabolic process	121	955	ENSBGRG00000000061(GABPA),ENSBGRG00000000285(CIART),ENSBGRG00000000764(CDKN1B),ENSBGRG00000000867(IKZF4),ENSBGRG00000000920(ZRANB3),ENSBGRG00000000977(CERS1),ENSBGRG00000001078(WNT10B),ENSBGRG00000001485(NFX1),ENSBGRG00000001845(KAT2B),ENSBGRG00000001895(ZBTB20),ENSBGRG00000001901(FOXP2),ENSBGRG00000002070(GLIS1),ENSBGRG00000002134(CAV1),ENSBGRG00000002337(ETV5),ENSBGRG00000002486(XRCC5),ENSBGRG0…	4.81e-05	0.0146493		ko04391	Hippo signaling pathway - fly	Environmental Information Processing	Signal transduction	9	60	ENSBGRG00000009912(PPP2R1B),ENSBGRG00000014587,ENSBGRG00000008689(ZDHHC18),ENSBGRG00000022648(TSHZ1),ENSBGRG00000005204(AJUBA),ENSBGRG00000019559(LLGL2),ENSBGRG00000017841(DCHS2),ENSBGRG00000010323(MOB1A),ENSBGRG00000013226(PPP2R2C)	0.0707929	0.570997		BP	GO:0006511	ubiquitin-dependent protein catabolic process	17	619	0.000583873	0.0935566	ENSBGRG00000002321(FBXO42),ENSBGRG00000002824(USP33),ENSBGRG00000004626(CBLB),ENSBGRG00000005984(CSNK1D),ENSBGRG00000007598(ZRANB1),ENSBGRG00000007714(RNF144B),ENSBGRG00000008227(UBR5),ENSBGRG00000009278(TMEM67),ENSBGRG00000012799(FBXW8),ENSBGRG00000012856(UBE2D1),ENSBGRG00000013378(FEM1C),ENSBGRG00000018694(USP9X),ENSBGRG00000022197(FBXL2),ENSBGRG00000023442(ATE1),ENSBGRG00000024679(PICALM),ENSB…
BP	GO:0051641	cellular localization	203	1766	ENSBGRG00000000197(EPHA3),ENSBGRG00000000428(ATR),ENSBGRG00000000587(GPSM2),ENSBGRG00000000593(PRKAA2),ENSBGRG00000000785(DDX39A),ENSBGRG00000001150(PRKAG1),ENSBGRG00000001178(SGTA),ENSBGRG00000001266(PSRC1),ENSBGRG00000001451(CHMP5),ENSBGRG00000001621(AQP3),ENSBGRG00000001676(ZDHHC23),ENSBGRG00000001845(KAT2B),ENSBGRG00000001905(TBCCD1),ENSBGRG00000002134(CAV1),ENSBGRG00000002167(SNX13),ENSBGRG0…	6.91e-05	0.0195515		ko04724	Glutamatergic synapse	Organismal Systems	Nervous system	12	88	ENSBGRG00000022468(SLC38A1),ENSBGRG00000016741(SLC1A6),ENSBGRG00000007869(KCNJ3),ENSBGRG00000001163,ENSBGRG00000023559(PRKACA),ENSBGRG00000001167(PRKACB),ENSBGRG00000000673(ADCY6),ENSBGRG00000000082(GRIK1),ENSBGRG00000002633(PPP3CA),ENSBGRG00000020983(GRIA4),ENSBGRG00000006888(GRIK3),ENSBGRG00000010476(GRIA3)	0.0748862	0.570997		BP	GO:1903076	regulation of protein localization to plasma membrane	7	129	0.000616681	0.0935566	ENSBGRG00000001896(DENND4C),ENSBGRG00000009140(PRKCH),ENSBGRG00000015284(SPTBN1),ENSBGRG00000016568(ACSL3),ENSBGRG00000020056(DLG1),ENSBGRG00000024679(PICALM),ENSBGRG00000024953(DENND4A)
BP	GO:0042221	response to chemical	255	2293	ENSBGRG00000000061(GABPA),ENSBGRG00000000074(N6AMT1),ENSBGRG00000000131(IFNAR2),ENSBGRG00000000197(EPHA3),ENSBGRG00000000213(NFE2L2),ENSBGRG00000000283(HP1BP3),ENSBGRG00000000520(DPYSL2),ENSBGRG00000000593(PRKAA2),ENSBGRG00000000673(ADCY6),ENSBGRG00000000764(CDKN1B),ENSBGRG00000000770(ECE1),ENSBGRG00000000798(GABRG2),ENSBGRG00000000962(MCL1),ENSBGRG00000000977(CERS1),ENSBGRG00000001078(WNT10B),EN…	6.95e-05	0.0195515		ko00531	Glycosaminoglycan degradation	Metabolism	Glycan biosynthesis and metabolism	4	19	ENSBGRG00000021306(HPSE2),ENSBGRG00000017029(GNS),ENSBGRG00000005773(ARSB),ENSBGRG00000014114(HGSNAT)	0.0754696	0.570997		BP	GO:0031346	positive regulation of cell projection organization	16	568	0.000647764	0.0935566	ENSBGRG00000002518(DDR2),ENSBGRG00000003960(ENAH),ENSBGRG00000006060(IGF1R),ENSBGRG00000007622(SMAD1),ENSBGRG00000008613(ENSBGRG00000008613),ENSBGRG00000009278(TMEM67),ENSBGRG00000009644(PPP1R9A),ENSBGRG00000011253(EHMT1),ENSBGRG00000012799(FBXW8),ENSBGRG00000016288(MAGI2),ENSBGRG00000017494(DOCK11),ENSBGRG00000018952(TRAK1),ENSBGRG00000022578(CFLAR),ENSBGRG00000024381(EEF2K),ENSBGRG00000024536(B…
MF	GO:0016740	transferase activity	199	1765	ENSBGRG00000000074(N6AMT1),ENSBGRG00000000197(EPHA3),ENSBGRG00000000237(AGPS),ENSBGRG00000000428(ATR),ENSBGRG00000000593(PRKAA2),ENSBGRG00000000918(STK36),ENSBGRG00000000977(CERS1),ENSBGRG00000001086,ENSBGRG00000001150(PRKAG1),ENSBGRG00000001167(PRKACB),ENSBGRG00000001329(STK17B),ENSBGRG00000001473(GUCY2C),ENSBGRG00000001485(NFX1),ENSBGRG00000001676(ZDHHC23),ENSBGRG00000001845(KAT2B),ENSBGRG00000…	7.32e-05	0.0218845		ko04144	Endocytosis	Cellular Processes	Transport and catabolism	26	225	ENSBGRG00000014742(VPS26B),ENSBGRG00000013724(GRK4),ENSBGRG00000020082(VPS37C),ENSBGRG00000025775(CYTH3),ENSBGRG00000015300(SH3GL1),ENSBGRG00000015464(IQSEC3),ENSBGRG00000001451(CHMP5),ENSBGRG00000026463(GIT2),ENSBGRG00000021211,ENSBGRG00000004928(VPS37B),ENSBGRG00000018911(RAB11FIP1),ENSBGRG00000006329(CYTH4),ENSBGRG00000014952(AGAP1),ENSBGRG00000007913(PIP5KL1),ENSBGRG00000013027(RAB7A),ENSBGRG…	0.0762966	0.570997		MF	GO:0005548	phospholipid transporter activity	5	61	0.000648824	0.0247321	ENSBGRG00000001141(ABCA1),ENSBGRG00000011855(ATP8B1),ENSBGRG00000012550(ATP8B4),ENSBGRG00000021443(ANO6),ENSBGRG00000023586(ABCC1)
MF	GO:0001067	regulatory region nucleic acid binding	81	605	ENSBGRG00000000061(GABPA),ENSBGRG00000000213(NFE2L2),ENSBGRG00000000285(CIART),ENSBGRG00000001424(LONP1),ENSBGRG00000001485(NFX1),ENSBGRG00000001789(STAT1),ENSBGRG00000001845(KAT2B),ENSBGRG00000001895(ZBTB20),ENSBGRG00000001954(ZNF395),ENSBGRG00000002070(GLIS1),ENSBGRG00000002337(ETV5),ENSBGRG00000002486(XRCC5),ENSBGRG00000002538(SMAD5),ENSBGRG00000002594(GLI2),ENSBGRG00000002783(RORC),ENSBGRG000…	7.51e-05	0.0218845		ko05207	Chemical carcinogenesis - receptor activation	Human Diseases	Cancer: overview	20	166	ENSBGRG00000020100(RB1),ENSBGRG00000010086(KPNA2),ENSBGRG00000002112(GSTM3),ENSBGRG00000010536(FGF2),ENSBGRG00000002079,ENSBGRG00000005831(KLF5),ENSBGRG00000001865(EPHX4),ENSBGRG00000010846(STAT5A),ENSBGRG00000011942(KPNA4),ENSBGRG00000010257(STAT3),ENSBGRG00000022014,ENSBGRG00000001167(PRKACB),ENSBGRG00000023559(PRKACA),ENSBGRG00000000673(ADCY6),ENSBGRG00000019755(CHRNA3),ENSBGRG00000003295(MGST…	0.0794673	0.570997		BP	GO:0019941	modification-dependent protein catabolic process	17	625	0.000650451	0.0935566	ENSBGRG00000002321(FBXO42),ENSBGRG00000002824(USP33),ENSBGRG00000004626(CBLB),ENSBGRG00000005984(CSNK1D),ENSBGRG00000007598(ZRANB1),ENSBGRG00000007714(RNF144B),ENSBGRG00000008227(UBR5),ENSBGRG00000009278(TMEM67),ENSBGRG00000012799(FBXW8),ENSBGRG00000012856(UBE2D1),ENSBGRG00000013378(FEM1C),ENSBGRG00000018694(USP9X),ENSBGRG00000022197(FBXL2),ENSBGRG00000023442(ATE1),ENSBGRG00000024679(PICALM),ENSB…
BP	GO:0006464	cellular protein modification process	285	2609	ENSBGRG00000000074(N6AMT1),ENSBGRG00000000197(EPHA3),ENSBGRG00000000203(DDOST),ENSBGRG00000000213(NFE2L2),ENSBGRG00000000428(ATR),ENSBGRG00000000593(PRKAA2),ENSBGRG00000000711(METAP2),ENSBGRG00000000726(PPIE),ENSBGRG00000000764(CDKN1B),ENSBGRG00000000918(STK36),ENSBGRG00000001111(C9orf72),ENSBGRG00000001150(PRKAG1),ENSBGRG00000001167(PRKACB),ENSBGRG00000001329(STK17B),ENSBGRG00000001422(RPAP2),EN…	8.61e-05	0.0229826		ko04979	Cholesterol metabolism	Organismal Systems	Digestive system	7	44	ENSBGRG00000012214(SCARB1),ENSBGRG00000019666(PLTP),ENSBGRG00000003668(APOA1),ENSBGRG00000001004(VDAC1),ENSBGRG00000003789(NCEH1),ENSBGRG00000005861(LDLR),ENSBGRG00000025948(VAPA)	0.081108	0.570997		MF	GO:0019899	enzyme binding	46	2551	0.000679745	0.0247321	ENSBGRG00000000599(ENSBGRG00000000599),ENSBGRG00000000973(FGD6),ENSBGRG00000001141(ABCA1),ENSBGRG00000001896(DENND4C),ENSBGRG00000002824(USP33),ENSBGRG00000003783(SPTB),ENSBGRG00000004086(DENND5B),ENSBGRG00000004274(RABGAP1L),ENSBGRG00000004626(CBLB),ENSBGRG00000006060(IGF1R),ENSBGRG00000007364(DENND2B),ENSBGRG00000007622(SMAD1),ENSBGRG00000007714(RNF144B),ENSBGRG00000009140(PRKCH),ENSBGRG0000000…
BP	GO:0031326	regulation of cellular biosynthetic process	290	2662	ENSBGRG00000000004(VGLL3),ENSBGRG00000000061(GABPA),ENSBGRG00000000213(NFE2L2),ENSBGRG00000000235,ENSBGRG00000000283(HP1BP3),ENSBGRG00000000285(CIART),ENSBGRG00000000405(MFSD2A),ENSBGRG00000000428(ATR),ENSBGRG00000000440(PYM1),ENSBGRG00000000461(NR4A3),ENSBGRG00000000535,ENSBGRG00000000542(CRTC1),ENSBGRG00000000726(PPIE),ENSBGRG00000000764(CDKN1B),ENSBGRG00000000867(IKZF4),ENSBGRG00000000918(STK3…	8.92e-05	0.0229826		ko04370	VEGF signaling pathway	Environmental Information Processing	Signal transduction	7	44	ENSBGRG00000018786(PTGS2),ENSBGRG00000005672(SRC),ENSBGRG00000005168,ENSBGRG00000002633(PPP3CA),ENSBGRG00000025476(MAPKAPK3),ENSBGRG00000019275(PLCG2),ENSBGRG00000016090(MAPKAPK2)	0.081108	0.570997		BP	GO:0048731	system development	89	6061	0.000696207	0.0935566	ENSBGRG00000000266(PROS1),ENSBGRG00000000599(ENSBGRG00000000599),ENSBGRG00000000629(GNPTAB),ENSBGRG00000001761(IFRD1),ENSBGRG00000002518(DDR2),ENSBGRG00000002824(USP33),ENSBGRG00000002944(TOMM70),ENSBGRG00000003783(SPTB),ENSBGRG00000003960(ENAH),ENSBGRG00000004149(PTBP3),ENSBGRG00000004274(RABGAP1L),ENSBGRG00000004461(LRRK1),ENSBGRG00000004575(SERINC5),ENSBGRG00000004626(CBLB),ENSBGRG00000005231(…
BP	GO:0036211	protein modification process	285	2611	ENSBGRG00000000074(N6AMT1),ENSBGRG00000000197(EPHA3),ENSBGRG00000000203(DDOST),ENSBGRG00000000213(NFE2L2),ENSBGRG00000000428(ATR),ENSBGRG00000000593(PRKAA2),ENSBGRG00000000711(METAP2),ENSBGRG00000000726(PPIE),ENSBGRG00000000764(CDKN1B),ENSBGRG00000000918(STK36),ENSBGRG00000001111(C9orf72),ENSBGRG00000001150(PRKAG1),ENSBGRG00000001167(PRKACB),ENSBGRG00000001329(STK17B),ENSBGRG00000001422(RPAP2),EN…	9.11e-05	0.0229826		ko05120	Epithelial cell signaling in Helicobacter pylori infection	Human Diseases	Infectious disease: bacterial	9	62	ENSBGRG00000003405(NOD1),ENSBGRG00000010308(ADAM10),ENSBGRG00000024118(JAM3),ENSBGRG00000001479(ATP6V1A),ENSBGRG00000005672(SRC),ENSBGRG00000005559(ATP6V1B1),ENSBGRG00000024848,ENSBGRG00000019275(PLCG2),ENSBGRG00000009889(ATP6V0A1)	0.0835616	0.570997		CC	GO:0008091	spectrin	2	4	0.000701708	0.16841	ENSBGRG00000003783(SPTB),ENSBGRG00000015284(SPTBN1)
BP	GO:0009891	positive regulation of biosynthetic process	156	1310	ENSBGRG00000000061(GABPA),ENSBGRG00000000213(NFE2L2),ENSBGRG00000000405(MFSD2A),ENSBGRG00000000440(PYM1),ENSBGRG00000000461(NR4A3),ENSBGRG00000000542(CRTC1),ENSBGRG00000000867(IKZF4),ENSBGRG00000001078(WNT10B),ENSBGRG00000001789(STAT1),ENSBGRG00000001845(KAT2B),ENSBGRG00000001892(ING5),ENSBGRG00000001895(ZBTB20),ENSBGRG00000001954(ZNF395),ENSBGRG00000002070(GLIS1),ENSBGRG00000002309(LUM),ENSBGRG0…	9.96e-05	0.0233238		ko04390	Hippo signaling pathway	Environmental Information Processing	Signal transduction	17	138	ENSBGRG00000005204(AJUBA),ENSBGRG00000001078(WNT10B),ENSBGRG00000009024,ENSBGRG00000013226(PPP2R2C),ENSBGRG00000024537(SMAD4),ENSBGRG00000010323(MOB1A),ENSBGRG00000002594(GLI2),ENSBGRG00000017354(BMPR2),ENSBGRG00000019559(LLGL2),ENSBGRG00000025440(SERPINE1),ENSBGRG00000014587,ENSBGRG00000009912(PPP2R1B),ENSBGRG00000007688(FZD6),ENSBGRG00000019557(WNT5B),ENSBGRG00000012559(DVL1),ENSBGRG00000005984…	0.0855382	0.570997		BP	GO:0030182	neuron differentiation	40	2154	0.000718061	0.0935566	ENSBGRG00000001761(IFRD1),ENSBGRG00000002518(DDR2),ENSBGRG00000002824(USP33),ENSBGRG00000003783(SPTB),ENSBGRG00000003960(ENAH),ENSBGRG00000004626(CBLB),ENSBGRG00000005231(NIBAN2),ENSBGRG00000005235(TENT2),ENSBGRG00000005984(CSNK1D),ENSBGRG00000006060(IGF1R),ENSBGRG00000007622(SMAD1),ENSBGRG00000008613(ENSBGRG00000008613),ENSBGRG00000009278(TMEM67),ENSBGRG00000009644(PPP1R9A),ENSBGRG00000010459(CD…
BP	GO:0035878	nail development	5	7	ENSBGRG00000003766(HOXC13),ENSBGRG00000007688(FZD6),ENSBGRG00000010388(MSX1),ENSBGRG00000010970(ITGA6),ENSBGRG00000024713(FOXN1)	0.00010406	0.0233238		ko04933	AGE-RAGE signaling pathway in diabetic complications	Human Diseases	Endocrine and metabolic disease	12	90	ENSBGRG00000013464(PLCD1),ENSBGRG00000024537(SMAD4),ENSBGRG00000010846(STAT5A),ENSBGRG00000025440(SERPINE1),ENSBGRG00000013466(COL1A2),ENSBGRG00000010257(STAT3),ENSBGRG00000001789(STAT1),ENSBGRG00000000764(CDKN1B),ENSBGRG00000010905(VEGFD),ENSBGRG00000021026(COL4A6),ENSBGRG00000019275(PLCG2),ENSBGRG00000000221(F3)	0.0855813	0.570997		BP	GO:0071705	nitrogen compound transport	43	2375	0.000732264	0.0935566	ENSBGRG00000000629(GNPTAB),ENSBGRG00000001141(ABCA1),ENSBGRG00000001728(ITPR2),ENSBGRG00000001896(DENND4C),ENSBGRG00000002944(TOMM70),ENSBGRG00000003322(WDR33),ENSBGRG00000004274(RABGAP1L),ENSBGRG00000004575(SERINC5),ENSBGRG00000004626(CBLB),ENSBGRG00000005343(ENSBGRG00000005343),ENSBGRG00000005379(ATG5),ENSBGRG00000005984(CSNK1D),ENSBGRG00000006060(IGF1R),ENSBGRG00000007817(ATP6V1C1),ENSBGRG0000…
BP	GO:0045935	positive regulation of nucleobase-containing compound metabolic process	154	1292	ENSBGRG00000000061(GABPA),ENSBGRG00000000213(NFE2L2),ENSBGRG00000000461(NR4A3),ENSBGRG00000000542(CRTC1),ENSBGRG00000000867(IKZF4),ENSBGRG00000001078(WNT10B),ENSBGRG00000001789(STAT1),ENSBGRG00000001845(KAT2B),ENSBGRG00000001892(ING5),ENSBGRG00000001895(ZBTB20),ENSBGRG00000001954(ZNF395),ENSBGRG00000002070(GLIS1),ENSBGRG00000002309(LUM),ENSBGRG00000002337(ETV5),ENSBGRG00000002486(XRCC5),ENSBGRG00…	0.000105866	0.0233238		ko00052	Galactose metabolism	Metabolism	Carbohydrate metabolism	5	28	ENSBGRG00000004485(G6PC3),ENSBGRG00000013005,ENSBGRG00000010367(UGP2),ENSBGRG00000004498(PFKP),ENSBGRG00000011917(HK1)	0.088706	0.570997		BP	GO:0060627	regulation of vesicle-mediated transport	18	690	0.000733062	0.0935566	ENSBGRG00000000266(PROS1),ENSBGRG00000001896(DENND4C),ENSBGRG00000004274(RABGAP1L),ENSBGRG00000005379(ATG5),ENSBGRG00000010412(ATP2A2),ENSBGRG00000011372(BMP2K),ENSBGRG00000012411(LRBA),ENSBGRG00000014952(AGAP1),ENSBGRG00000015822(RABGAP1),ENSBGRG00000016018(ABR),ENSBGRG00000016288(MAGI2),ENSBGRG00000016568(ACSL3),ENSBGRG00000016974(NBEA),ENSBGRG00000021365(PIK3C3),ENSBGRG00000021443(ANO6),ENSBGR…
BP	GO:0048513	animal organ development	241	2164	ENSBGRG00000000061(GABPA),ENSBGRG00000000213(NFE2L2),ENSBGRG00000000215(PLCL2),ENSBGRG00000000405(MFSD2A),ENSBGRG00000000520(DPYSL2),ENSBGRG00000000682(CECR2),ENSBGRG00000000764(CDKN1B),ENSBGRG00000000770(ECE1),ENSBGRG00000000918(STK36),ENSBGRG00000001078(WNT10B),ENSBGRG00000001347(LMBR1L),ENSBGRG00000001621(AQP3),ENSBGRG00000001789(STAT1),ENSBGRG00000001900(FXR1),ENSBGRG00000001901(FOXP2),ENSBGR…	0.000106219	0.0233238		ko00983	Drug metabolism - other enzymes	Metabolism	Xenobiotics biodegradation and metabolism	8	54	ENSBGRG00000017832(CYP2E1),ENSBGRG00000009124(RRM2B),ENSBGRG00000022014,ENSBGRG00000014307(NME7),ENSBGRG00000002079,ENSBGRG00000002112(GSTM3),ENSBGRG00000011055,ENSBGRG00000003295(MGST3)	0.0905781	0.570997		BP	GO:0031444	slow-twitch skeletal muscle fiber contraction	2	4	0.000734953	0.0935566	ENSBGRG00000007922(MYH6),ENSBGRG00000008351(MYH7)
BP	GO:0007399	nervous system development	158	1332	ENSBGRG00000000197(EPHA3),ENSBGRG00000000405(MFSD2A),ENSBGRG00000000520(DPYSL2),ENSBGRG00000000682(CECR2),ENSBGRG00000000770(ECE1),ENSBGRG00000000798(GABRG2),ENSBGRG00000000909(FSTL4),ENSBGRG00000000918(STK36),ENSBGRG00000001070(ATXN10),ENSBGRG00000001111(C9orf72),ENSBGRG00000001167(PRKACB),ENSBGRG00000001750(ADGRL2),ENSBGRG00000001761(IFRD1),ENSBGRG00000001901(FOXP2),ENSBGRG00000001923(GAP43),EN…	0.00010893	0.0233238		ko04919	Thyroid hormone signaling pathway	Organismal Systems	Endocrine system	14	110	ENSBGRG00000001845(KAT2B),ENSBGRG00000001868(DIO1),ENSBGRG00000023716(SIN3A),ENSBGRG00000020358(MED30),ENSBGRG00000005672(SRC),ENSBGRG00000004498(PFKP),ENSBGRG00000018175(PFKFB2),ENSBGRG00000013464(PLCD1),ENSBGRG00000001789(STAT1),ENSBGRG00000020636(MED4),ENSBGRG00000019027(ATP2A3),ENSBGRG00000019275(PLCG2),ENSBGRG00000023559(PRKACA),ENSBGRG00000001167(PRKACB)	0.0908132	0.570997		MF	GO:0016887	ATPase activity	14	456	0.000740776	0.0247321	ENSBGRG00000001141(ABCA1),ENSBGRG00000004129(PMS1),ENSBGRG00000007817(ATP6V1C1),ENSBGRG00000007922(MYH6),ENSBGRG00000008351(MYH7),ENSBGRG00000010412(ATP2A2),ENSBGRG00000011586(ERCC6),ENSBGRG00000011855(ATP8B1),ENSBGRG00000012550(ATP8B4),ENSBGRG00000014876(ATP7B),ENSBGRG00000020282(SMARCA5),ENSBGRG00000020672(ABCG2),ENSBGRG00000022289(MTREX),ENSBGRG00000023586(ABCC1)
BP	GO:0010629	negative regulation of gene expression	151	1264	ENSBGRG00000000061(GABPA),ENSBGRG00000000285(CIART),ENSBGRG00000000440(PYM1),ENSBGRG00000000593(PRKAA2),ENSBGRG00000000764(CDKN1B),ENSBGRG00000000867(IKZF4),ENSBGRG00000001078(WNT10B),ENSBGRG00000001485(NFX1),ENSBGRG00000001845(KAT2B),ENSBGRG00000001895(ZBTB20),ENSBGRG00000001900(FXR1),ENSBGRG00000001901(FOXP2),ENSBGRG00000002070(GLIS1),ENSBGRG00000002134(CAV1),ENSBGRG00000002228(IGFBP5),ENSBGRG0…	0.000111597	0.0233238		ko04713	Circadian entrainment	Organismal Systems	Environmental adaptation	11	82	ENSBGRG00000011775(NOS1),ENSBGRG00000007753(CACNA1G),ENSBGRG00000020983(GRIA4),ENSBGRG00000021420(CAMK2A),ENSBGRG00000000673(ADCY6),ENSBGRG00000023559(PRKACA),ENSBGRG00000001167(PRKACB),ENSBGRG00000007869(KCNJ3),ENSBGRG00000016011(MTNR1A),ENSBGRG00000010476(GRIA3),ENSBGRG00000026596(CACNA1H)	0.0937932	0.570997		MF	GO:0017111	nucleoside-triphosphatase activity	19	737	0.000745576	0.0247321	ENSBGRG00000001141(ABCA1),ENSBGRG00000004129(PMS1),ENSBGRG00000007061(RRAS2),ENSBGRG00000007817(ATP6V1C1),ENSBGRG00000007922(MYH6),ENSBGRG00000008351(MYH7),ENSBGRG00000010412(ATP2A2),ENSBGRG00000011586(ERCC6),ENSBGRG00000011855(ATP8B1),ENSBGRG00000012114(GFM2),ENSBGRG00000012475(EEFSEC),ENSBGRG00000012550(ATP8B4),ENSBGRG00000014876(ATP7B),ENSBGRG00000014952(AGAP1),ENSBGRG00000018952(TRAK1),ENSBGR…
BP	GO:0009889	regulation of biosynthetic process	292	2693	ENSBGRG00000000004(VGLL3),ENSBGRG00000000061(GABPA),ENSBGRG00000000213(NFE2L2),ENSBGRG00000000235,ENSBGRG00000000283(HP1BP3),ENSBGRG00000000285(CIART),ENSBGRG00000000405(MFSD2A),ENSBGRG00000000428(ATR),ENSBGRG00000000440(PYM1),ENSBGRG00000000461(NR4A3),ENSBGRG00000000535,ENSBGRG00000000542(CRTC1),ENSBGRG00000000726(PPIE),ENSBGRG00000000764(CDKN1B),ENSBGRG00000000867(IKZF4),ENSBGRG00000000918(STK3…	0.000118367	0.0240515		ko04920	Adipocytokine signaling pathway	Organismal Systems	Endocrine system	9	64	ENSBGRG00000014262(PPARGC1A),ENSBGRG00000013814(STK11),ENSBGRG00000016630(PRKAB1),ENSBGRG00000010942(PRKAB2),ENSBGRG00000010257(STAT3),ENSBGRG00000000593(PRKAA2),ENSBGRG00000001150(PRKAG1),ENSBGRG00000004485(G6PC3),ENSBGRG00000023249(LEP)	0.0976257	0.570997		MF	GO:0140328	floppase activity	2	4	0.000766572	0.0247321	ENSBGRG00000001141(ABCA1),ENSBGRG00000023586(ABCC1)
MF	GO:0000976	transcription regulatory region sequence-specific DNA binding	80	604	ENSBGRG00000000061(GABPA),ENSBGRG00000000213(NFE2L2),ENSBGRG00000000285(CIART),ENSBGRG00000001424(LONP1),ENSBGRG00000001485(NFX1),ENSBGRG00000001789(STAT1),ENSBGRG00000001845(KAT2B),ENSBGRG00000001895(ZBTB20),ENSBGRG00000001954(ZNF395),ENSBGRG00000002070(GLIS1),ENSBGRG00000002337(ETV5),ENSBGRG00000002486(XRCC5),ENSBGRG00000002538(SMAD5),ENSBGRG00000002594(GLI2),ENSBGRG00000002783(RORC),ENSBGRG000…	0.000119311	0.0289726		ko03410	Base excision repair	Genetic Information Processing	Replication and repair	5	29	ENSBGRG00000005223(PARP1),ENSBGRG00000008579(NEIL3),ENSBGRG00000021180(LIG3),ENSBGRG00000024546,ENSBGRG00000007092	0.0999632	0.570997		MF	GO:0140096	catalytic activity, acting on a protein	39	2057	0.000768077	0.0247321	ENSBGRG00000002518(DDR2),ENSBGRG00000002824(USP33),ENSBGRG00000004461(LRRK1),ENSBGRG00000004626(CBLB),ENSBGRG00000005984(CSNK1D),ENSBGRG00000006051(CDC42BPA),ENSBGRG00000006060(IGF1R),ENSBGRG00000007598(ZRANB1),ENSBGRG00000007714(RNF144B),ENSBGRG00000008227(UBR5),ENSBGRG00000008434(UBE2Q1),ENSBGRG00000008463(TLK1),ENSBGRG00000009140(PRKCH),ENSBGRG00000010459(CDK19),ENSBGRG00000010600(PGGT1B),ENSB…
BP	GO:0048869	cellular developmental process	272	2489	ENSBGRG00000000061(GABPA),ENSBGRG00000000174,ENSBGRG00000000197(EPHA3),ENSBGRG00000000213(NFE2L2),ENSBGRG00000000215(PLCL2),ENSBGRG00000000405(MFSD2A),ENSBGRG00000000428(ATR),ENSBGRG00000000520(DPYSL2),ENSBGRG00000000682(CECR2),ENSBGRG00000000764(CDKN1B),ENSBGRG00000000770(ECE1),ENSBGRG00000000909(FSTL4),ENSBGRG00000001004(VDAC1),ENSBGRG00000001070(ATXN10),ENSBGRG00000001078(WNT10B),ENSBGRG000000…	0.000128911	0.025486		ko04361	Axon regeneration	Organismal Systems	Development and regeneration	11	83	ENSBGRG00000025554(DGKK),ENSBGRG00000000017(ROBO2),ENSBGRG00000007174(FOXO3),ENSBGRG00000010308(ADAM10),ENSBGRG00000016090(MAPKAPK2),ENSBGRG00000000593(PRKAA2),ENSBGRG00000012573(NCK2),ENSBGRG00000023559(PRKACA),ENSBGRG00000001167(PRKACB),ENSBGRG00000009562(AGO4),ENSBGRG00000017142(DUSP5)	0.100172	0.570997		BP	GO:0050789	regulation of biological process	143	11119	0.000770184	0.0935566	ENSBGRG00000000139(SON),ENSBGRG00000000262(BOLL),ENSBGRG00000000266(PROS1),ENSBGRG00000000973(FGD6),ENSBGRG00000001023(TBXAS1),ENSBGRG00000001141(ABCA1),ENSBGRG00000001728(ITPR2),ENSBGRG00000001761(IFRD1),ENSBGRG00000001896(DENND4C),ENSBGRG00000002023(ZNF596),ENSBGRG00000002158(HMBOX1),ENSBGRG00000002518(DDR2),ENSBGRG00000002693(APBB2),ENSBGRG00000002824(USP33),ENSBGRG00000002944(TOMM70),ENSBGRG0…
BP	GO:2000112	regulation of cellular macromolecule biosynthetic process	278	2552	ENSBGRG00000000004(VGLL3),ENSBGRG00000000061(GABPA),ENSBGRG00000000213(NFE2L2),ENSBGRG00000000235,ENSBGRG00000000283(HP1BP3),ENSBGRG00000000285(CIART),ENSBGRG00000000428(ATR),ENSBGRG00000000440(PYM1),ENSBGRG00000000461(NR4A3),ENSBGRG00000000535,ENSBGRG00000000542(CRTC1),ENSBGRG00000000726(PPIE),ENSBGRG00000000764(CDKN1B),ENSBGRG00000000867(IKZF4),ENSBGRG00000000918(STK36),ENSBGRG00000000920(ZRANB…	0.000132486	0.0255036		ko05410	Hypertrophic cardiomyopathy	Human Diseases	Cardiovascular disease	11	83	ENSBGRG00000003979,ENSBGRG00000021871(CACNG6),ENSBGRG00000021717(CACNG7),ENSBGRG00000004717(ITGA5),ENSBGRG00000010970(ITGA6),ENSBGRG00000016630(PRKAB1),ENSBGRG00000010942(PRKAB2),ENSBGRG00000019027(ATP2A3),ENSBGRG00000000593(PRKAA2),ENSBGRG00000001150(PRKAG1),ENSBGRG00000021687(CACNA2D3)	0.100172	0.570997		BP	GO:0043632	modification-dependent macromolecule catabolic process	17	635	0.000775944	0.0935566	ENSBGRG00000002321(FBXO42),ENSBGRG00000002824(USP33),ENSBGRG00000004626(CBLB),ENSBGRG00000005984(CSNK1D),ENSBGRG00000007598(ZRANB1),ENSBGRG00000007714(RNF144B),ENSBGRG00000008227(UBR5),ENSBGRG00000009278(TMEM67),ENSBGRG00000012799(FBXW8),ENSBGRG00000012856(UBE2D1),ENSBGRG00000013378(FEM1C),ENSBGRG00000018694(USP9X),ENSBGRG00000022197(FBXL2),ENSBGRG00000023442(ATE1),ENSBGRG00000024679(PICALM),ENSB…
BP	GO:0006366	transcription by RNA polymerase II	162	1378	ENSBGRG00000000061(GABPA),ENSBGRG00000000213(NFE2L2),ENSBGRG00000000461(NR4A3),ENSBGRG00000000542(CRTC1),ENSBGRG00000000867(IKZF4),ENSBGRG00000001078(WNT10B),ENSBGRG00000001422(RPAP2),ENSBGRG00000001485(NFX1),ENSBGRG00000001789(STAT1),ENSBGRG00000001845(KAT2B),ENSBGRG00000001895(ZBTB20),ENSBGRG00000001954(ZNF395),ENSBGRG00000002070(GLIS1),ENSBGRG00000002072(hoxA10),ENSBGRG00000002134(CAV1),ENSBGR…	0.000139092	0.0260888		ko04212	Longevity regulating pathway - worm	Organismal Systems	Aging	10	74	ENSBGRG00000018551(PPP4R3B),ENSBGRG00000007174(FOXO3),ENSBGRG00000000213(NFE2L2),ENSBGRG00000023293(SCD5),ENSBGRG00000003295(MGST3),ENSBGRG00000005223(PARP1),ENSBGRG00000002112(GSTM3),ENSBGRG00000002079,ENSBGRG00000022014,ENSBGRG00000006927(FOXA2)	0.102887	0.570997		BP	GO:0010256	endomembrane system organization	15	527	0.00086135	0.0987573	ENSBGRG00000001141(ABCA1),ENSBGRG00000003783(SPTB),ENSBGRG00000005984(CSNK1D),ENSBGRG00000008613(ENSBGRG00000008613),ENSBGRG00000010412(ATP2A2),ENSBGRG00000011855(ATP8B1),ENSBGRG00000012550(ATP8B4),ENSBGRG00000012799(FBXW8),ENSBGRG00000015284(SPTBN1),ENSBGRG00000016018(ABR),ENSBGRG00000019601(CAMSAP2),ENSBGRG00000021132(VMP1),ENSBGRG00000021365(PIK3C3),ENSBGRG00000021443(ANO6),ENSBGRG00000025394(…
BP	GO:0019219	regulation of nucleobase-containing compound metabolic process	285	2628	ENSBGRG00000000004(VGLL3),ENSBGRG00000000061(GABPA),ENSBGRG00000000213(NFE2L2),ENSBGRG00000000235,ENSBGRG00000000283(HP1BP3),ENSBGRG00000000285(CIART),ENSBGRG00000000461(NR4A3),ENSBGRG00000000535,ENSBGRG00000000542(CRTC1),ENSBGRG00000000726(PPIE),ENSBGRG00000000764(CDKN1B),ENSBGRG00000000867(IKZF4),ENSBGRG00000000918(STK36),ENSBGRG00000000920(ZRANB3),ENSBGRG00000000977(CERS1),ENSBGRG00000001078(W…	0.000145762	0.0266562		ko04514	Cell adhesion molecules	Environmental Information Processing	Signaling molecules and interaction	17	142	ENSBGRG00000018381,ENSBGRG00000022452,ENSBGRG00000024571,ENSBGRG00000006946(NCAM1),ENSBGRG00000024118(JAM3),ENSBGRG00000012170(CADM3),ENSBGRG00000013920(NECTIN1),ENSBGRG00000003111(CLDN14),ENSBGRG00000012246(ICOS),ENSBGRG00000025034(PVR),ENSBGRG00000024466(PTPRM),ENSBGRG00000006267(PDCD1LG2),ENSBGRG00000008748,ENSBGRG00000005094(NEGR1),ENSBGRG00000002717,ENSBGRG00000010970(ITGA6),ENSBGRG000000106…	0.104487	0.570997		BP	GO:0090630	activation of GTPase activity	6	100	0.000897434	0.0987573	ENSBGRG00000001896(DENND4C),ENSBGRG00000004274(RABGAP1L),ENSBGRG00000014952(AGAP1),ENSBGRG00000015822(RABGAP1),ENSBGRG00000018618(DOCK7),ENSBGRG00000024953(DENND4A)
BP	GO:0051252	regulation of RNA metabolic process	268	2454	ENSBGRG00000000004(VGLL3),ENSBGRG00000000061(GABPA),ENSBGRG00000000213(NFE2L2),ENSBGRG00000000235,ENSBGRG00000000283(HP1BP3),ENSBGRG00000000285(CIART),ENSBGRG00000000461(NR4A3),ENSBGRG00000000535,ENSBGRG00000000542(CRTC1),ENSBGRG00000000726(PPIE),ENSBGRG00000000764(CDKN1B),ENSBGRG00000000867(IKZF4),ENSBGRG00000000918(STK36),ENSBGRG00000001078(WNT10B),ENSBGRG00000001422(RPAP2),ENSBGRG00000001485(N…	0.00015374	0.0274295		ko00051	Fructose and mannose metabolism	Metabolism	Carbohydrate metabolism	5	30	ENSBGRG00000011917(HK1),ENSBGRG00000013005,ENSBGRG00000012269(TIGAR),ENSBGRG00000004498(PFKP),ENSBGRG00000018175(PFKFB2)	0.111898	0.570997		BP	GO:0048666	neuron development	35	1821	0.000906536	0.0987573	ENSBGRG00000001761(IFRD1),ENSBGRG00000002518(DDR2),ENSBGRG00000002824(USP33),ENSBGRG00000003783(SPTB),ENSBGRG00000003960(ENAH),ENSBGRG00000005231(NIBAN2),ENSBGRG00000006060(IGF1R),ENSBGRG00000007622(SMAD1),ENSBGRG00000008613(ENSBGRG00000008613),ENSBGRG00000009278(TMEM67),ENSBGRG00000009644(PPP1R9A),ENSBGRG00000010459(CDK19),ENSBGRG00000011253(EHMT1),ENSBGRG00000011372(BMP2K),ENSBGRG00000011855(AT…
BP	GO:0007166	cell surface receptor signaling pathway	186	1622	ENSBGRG00000000131(IFNAR2),ENSBGRG00000000197(EPHA3),ENSBGRG00000000215(PLCL2),ENSBGRG00000000221(F3),ENSBGRG00000000461(NR4A3),ENSBGRG00000000764(CDKN1B),ENSBGRG00000000770(ECE1),ENSBGRG00000000909(FSTL4),ENSBGRG00000000918(STK36),ENSBGRG00000000962(MCL1),ENSBGRG00000001078(WNT10B),ENSBGRG00000001163,ENSBGRG00000001167(PRKACB),ENSBGRG00000001347(LMBR1L),ENSBGRG00000001750(ADGRL2),ENSBGRG00000001…	0.000167288	0.0279868		ko00591	Linoleic acid metabolism	Metabolism	Lipid metabolism	5	30	ENSBGRG00000017832(CYP2E1),ENSBGRG00000005071,ENSBGRG00000005175,ENSBGRG00000025402(ALOX15),ENSBGRG00000025285	0.111898	0.570997		BP	GO:0016192	vesicle-mediated transport	39	2111	0.000939725	0.0987573	ENSBGRG00000000266(PROS1),ENSBGRG00000001141(ABCA1),ENSBGRG00000001484(SEC24B),ENSBGRG00000001896(DENND4C),ENSBGRG00000003783(SPTB),ENSBGRG00000004274(RABGAP1L),ENSBGRG00000004626(CBLB),ENSBGRG00000005343(ENSBGRG00000005343),ENSBGRG00000005379(ATG5),ENSBGRG00000005984(CSNK1D),ENSBGRG00000006248(PIKFYVE),ENSBGRG00000007429(LRRC40),ENSBGRG00000009140(PRKCH),ENSBGRG00000010412(ATP2A2),ENSBGRG0000001…
BP	GO:0010556	regulation of macromolecule biosynthetic process	279	2571	ENSBGRG00000000004(VGLL3),ENSBGRG00000000061(GABPA),ENSBGRG00000000213(NFE2L2),ENSBGRG00000000235,ENSBGRG00000000283(HP1BP3),ENSBGRG00000000285(CIART),ENSBGRG00000000428(ATR),ENSBGRG00000000440(PYM1),ENSBGRG00000000461(NR4A3),ENSBGRG00000000535,ENSBGRG00000000542(CRTC1),ENSBGRG00000000726(PPIE),ENSBGRG00000000764(CDKN1B),ENSBGRG00000000867(IKZF4),ENSBGRG00000000918(STK36),ENSBGRG00000000920(ZRANB…	0.00016795	0.0279868		ko04068	FoxO signaling pathway	Environmental Information Processing	Signal transduction	14	114	ENSBGRG00000007038(FASLG),ENSBGRG00000004485(G6PC3),ENSBGRG00000007174(FOXO3),ENSBGRG00000000764(CDKN1B),ENSBGRG00000010257(STAT3),ENSBGRG00000000593(PRKAA2),ENSBGRG00000024969(RBL2),ENSBGRG00000001163,ENSBGRG00000001150(PRKAG1),ENSBGRG00000014113(ATM),ENSBGRG00000013814(STK11),ENSBGRG00000024537(SMAD4),ENSBGRG00000016630(PRKAB1),ENSBGRG00000010942(PRKAB2)	0.113212	0.570997		BP	GO:0016043	cellular component organization	100	7078	0.00096299	0.0987573	ENSBGRG00000000139(SON),ENSBGRG00000000266(PROS1),ENSBGRG00000000599(ENSBGRG00000000599),ENSBGRG00000000629(GNPTAB),ENSBGRG00000000973(FGD6),ENSBGRG00000001141(ABCA1),ENSBGRG00000001484(SEC24B),ENSBGRG00000001761(IFRD1),ENSBGRG00000001896(DENND4C),ENSBGRG00000002158(HMBOX1),ENSBGRG00000002518(DDR2),ENSBGRG00000002693(APBB2),ENSBGRG00000002824(USP33),ENSBGRG00000002944(TOMM70),ENSBGRG00000003783(S…
BP	GO:0031328	positive regulation of cellular biosynthetic process	153	1295	ENSBGRG00000000061(GABPA),ENSBGRG00000000213(NFE2L2),ENSBGRG00000000405(MFSD2A),ENSBGRG00000000440(PYM1),ENSBGRG00000000461(NR4A3),ENSBGRG00000000542(CRTC1),ENSBGRG00000000867(IKZF4),ENSBGRG00000001078(WNT10B),ENSBGRG00000001789(STAT1),ENSBGRG00000001845(KAT2B),ENSBGRG00000001892(ING5),ENSBGRG00000001954(ZNF395),ENSBGRG00000002070(GLIS1),ENSBGRG00000002309(LUM),ENSBGRG00000002337(ETV5),ENSBGRG000…	0.000171468	0.0279868		ko04014	Ras signaling pathway	Environmental Information Processing	Signal transduction	24	215	ENSBGRG00000024943,ENSBGRG00000001167(PRKACB),ENSBGRG00000023559(PRKACA),ENSBGRG00000013827(RGL1),ENSBGRG00000010536(FGF2),ENSBGRG00000017575(FGFR3),ENSBGRG00000006109(FLT4),ENSBGRG00000019063(RASGRF1),ENSBGRG00000005071,ENSBGRG00000013093(FGF7),ENSBGRG00000005168,ENSBGRG00000005175,ENSBGRG00000015132(RASSF5),ENSBGRG00000011285(PAK5),ENSBGRG00000003000(RASA1),ENSBGRG00000004372(NTRK2),ENSBGRG0000…	0.114952	0.570997		BP	GO:0042996	regulation of Golgi to plasma membrane protein transport	3	18	0.000990938	0.0987573	ENSBGRG00000001896(DENND4C),ENSBGRG00000016568(ACSL3),ENSBGRG00000024953(DENND4A)
CC	GO:0005794	Golgi apparatus	99	777	ENSBGRG00000000213(NFE2L2),ENSBGRG00000000428(ATR),ENSBGRG00000000593(PRKAA2),ENSBGRG00000001627(MYO1B),ENSBGRG00000002134(CAV1),ENSBGRG00000002448(MARCHF4),ENSBGRG00000003130(ERGIC2),ENSBGRG00000003251(GLIPR2),ENSBGRG00000003726(RGP1),ENSBGRG00000004223(FAM114A1),ENSBGRG00000004281(HDAC5),ENSBGRG00000004301(GASK1B),ENSBGRG00000004717(ITGA5),ENSBGRG00000005204(AJUBA),ENSBGRG00000005743(LYSMD3),EN…	0.000174165	0.0106365		ko04927	Cortisol synthesis and secretion	Organismal Systems	Endocrine system	8	57	ENSBGRG00000001167(PRKACB),ENSBGRG00000023559(PRKACA),ENSBGRG00000000673(ADCY6),ENSBGRG00000012214(SCARB1),ENSBGRG00000007753(CACNA1G),ENSBGRG00000003789(NCEH1),ENSBGRG00000026596(CACNA1H),ENSBGRG00000005861(LDLR)	0.115233	0.570997		BP	GO:0051603	proteolysis involved in cellular protein catabolic process	18	714	0.00108304	0.0987573	ENSBGRG00000002321(FBXO42),ENSBGRG00000002824(USP33),ENSBGRG00000004626(CBLB),ENSBGRG00000005984(CSNK1D),ENSBGRG00000007598(ZRANB1),ENSBGRG00000007714(RNF144B),ENSBGRG00000008227(UBR5),ENSBGRG00000009278(TMEM67),ENSBGRG00000012799(FBXW8),ENSBGRG00000012856(UBE2D1),ENSBGRG00000013378(FEM1C),ENSBGRG00000018694(USP9X),ENSBGRG00000022197(FBXL2),ENSBGRG00000023442(ATE1),ENSBGRG00000024679(PICALM),ENSB…
BP	GO:0048523	negative regulation of cellular process	323	3032	ENSBGRG00000000061(GABPA),ENSBGRG00000000197(EPHA3),ENSBGRG00000000213(NFE2L2),ENSBGRG00000000215(PLCL2),ENSBGRG00000000285(CIART),ENSBGRG00000000405(MFSD2A),ENSBGRG00000000428(ATR),ENSBGRG00000000593(PRKAA2),ENSBGRG00000000764(CDKN1B),ENSBGRG00000000766(TRIM35),ENSBGRG00000000867(IKZF4),ENSBGRG00000000909(FSTL4),ENSBGRG00000000920(ZRANB3),ENSBGRG00000000962(MCL1),ENSBGRG00000000977(CERS1),ENSBGR…	0.000177689	0.0279868		ko00270	Cysteine and methionine metabolism	Metabolism	Amino acid metabolism	7	48	ENSBGRG00000001086,ENSBGRG00000019779(BCAT2),ENSBGRG00000004279(DNMT3B),ENSBGRG00000005578(BHMT),ENSBGRG00000002429(AHCYL1),ENSBGRG00000015370(PSAT1),ENSBGRG00000008772(GSS)	0.11642	0.570997		BP	GO:0043547	positive regulation of GTPase activity	12	377	0.00111073	0.0987573	ENSBGRG00000001896(DENND4C),ENSBGRG00000004274(RABGAP1L),ENSBGRG00000011309(ARHGAP18),ENSBGRG00000013023(RAPGEF1),ENSBGRG00000014952(AGAP1),ENSBGRG00000015822(RABGAP1),ENSBGRG00000016018(ABR),ENSBGRG00000017494(DOCK11),ENSBGRG00000018618(DOCK7),ENSBGRG00000022862(DOCK9),ENSBGRG00000024679(PICALM),ENSBGRG00000024953(DENND4A)
BP	GO:0045893	positive regulation of transcription, DNA-templated	132	1091	ENSBGRG00000000061(GABPA),ENSBGRG00000000213(NFE2L2),ENSBGRG00000000461(NR4A3),ENSBGRG00000000542(CRTC1),ENSBGRG00000000867(IKZF4),ENSBGRG00000001078(WNT10B),ENSBGRG00000001789(STAT1),ENSBGRG00000001845(KAT2B),ENSBGRG00000001892(ING5),ENSBGRG00000001954(ZNF395),ENSBGRG00000002070(GLIS1),ENSBGRG00000002309(LUM),ENSBGRG00000002337(ETV5),ENSBGRG00000002538(SMAD5),ENSBGRG00000002568(MAP3K2),ENSBGRG00…	0.000179819	0.0279868		ko04010	MAPK signaling pathway	Environmental Information Processing	Signal transduction	28	257	ENSBGRG00000019063(RASGRF1),ENSBGRG00000013093(FGF7),ENSBGRG00000013013(MAP3K20),ENSBGRG00000005404(MAPK8IP2),ENSBGRG00000010905(VEGFD),ENSBGRG00000026596(CACNA1H),ENSBGRG00000023016(MAPK7),ENSBGRG00000003000(RASA1),ENSBGRG00000016090(MAPKAPK2),ENSBGRG00000004372(NTRK2),ENSBGRG00000002568(MAP3K2),ENSBGRG00000017283(FAS),ENSBGRG00000007038(FASLG),ENSBGRG00000005369(FLT3),ENSBGRG00000001167(PRKACB)…	0.1178	0.570997		BP	GO:0016358	dendrite development	14	486	0.00114224	0.0987573	ENSBGRG00000003960(ENAH),ENSBGRG00000007622(SMAD1),ENSBGRG00000009644(PPP1R9A),ENSBGRG00000011253(EHMT1),ENSBGRG00000011372(BMP2K),ENSBGRG00000012463(RERE),ENSBGRG00000012799(FBXW8),ENSBGRG00000015284(SPTBN1),ENSBGRG00000015942(EBF1),ENSBGRG00000018952(TRAK1),ENSBGRG00000019601(CAMSAP2),ENSBGRG00000024381(EEF2K),ENSBGRG00000024536(BMP5),ENSBGRG00000024679(PICALM)
BP	GO:1903508	positive regulation of nucleic acid-templated transcription	132	1091	ENSBGRG00000000061(GABPA),ENSBGRG00000000213(NFE2L2),ENSBGRG00000000461(NR4A3),ENSBGRG00000000542(CRTC1),ENSBGRG00000000867(IKZF4),ENSBGRG00000001078(WNT10B),ENSBGRG00000001789(STAT1),ENSBGRG00000001845(KAT2B),ENSBGRG00000001892(ING5),ENSBGRG00000001954(ZNF395),ENSBGRG00000002070(GLIS1),ENSBGRG00000002309(LUM),ENSBGRG00000002337(ETV5),ENSBGRG00000002538(SMAD5),ENSBGRG00000002568(MAP3K2),ENSBGRG00…	0.000179819	0.0279868		ko05145	Toxoplasmosis	Human Diseases	Infectious disease: parasitic	13	105	ENSBGRG00000016956(IL12B),ENSBGRG00000009568(LAMC3),ENSBGRG00000026668(PIK3R6),ENSBGRG00000016285,ENSBGRG00000016632(LAMB2),ENSBGRG00000010970(ITGA6),ENSBGRG00000013000(NOS2),ENSBGRG00000007268(PIK3CG),ENSBGRG00000005861(LDLR),ENSBGRG00000010257(STAT3),ENSBGRG00000005405,ENSBGRG00000022452,ENSBGRG00000001789(STAT1)	0.118087	0.570997		CC	GO:0097575	lateral cell cortex	2	5	0.00116111	0.1733	ENSBGRG00000001896(DENND4C),ENSBGRG00000024953(DENND4A)
BP	GO:0051254	positive regulation of RNA metabolic process	139	1161	ENSBGRG00000000061(GABPA),ENSBGRG00000000213(NFE2L2),ENSBGRG00000000461(NR4A3),ENSBGRG00000000542(CRTC1),ENSBGRG00000000867(IKZF4),ENSBGRG00000001078(WNT10B),ENSBGRG00000001789(STAT1),ENSBGRG00000001845(KAT2B),ENSBGRG00000001892(ING5),ENSBGRG00000001954(ZNF395),ENSBGRG00000002070(GLIS1),ENSBGRG00000002309(LUM),ENSBGRG00000002337(ETV5),ENSBGRG00000002490(CELF3),ENSBGRG00000002538(SMAD5),ENSBGRG000…	0.000193591	0.0291884		ko05414	Dilated cardiomyopathy	Human Diseases	Cardiovascular disease	11	86	ENSBGRG00000021687(CACNA2D3),ENSBGRG00000021871(CACNG6),ENSBGRG00000021717(CACNG7),ENSBGRG00000004717(ITGA5),ENSBGRG00000019027(ATP2A3),ENSBGRG00000000673(ADCY6),ENSBGRG00000023559(PRKACA),ENSBGRG00000001167(PRKACB),ENSBGRG00000003979,ENSBGRG00000009260,ENSBGRG00000010970(ITGA6)	0.120809	0.570997		BP	GO:0032483	regulation of Rab protein signal transduction	3	19	0.00116711	0.0987573	ENSBGRG00000001896(DENND4C),ENSBGRG00000004086(DENND5B),ENSBGRG00000024953(DENND4A)
BP	GO:0051172	negative regulation of nitrogen compound metabolic process	168	1447	ENSBGRG00000000061(GABPA),ENSBGRG00000000285(CIART),ENSBGRG00000000593(PRKAA2),ENSBGRG00000000764(CDKN1B),ENSBGRG00000000867(IKZF4),ENSBGRG00000000920(ZRANB3),ENSBGRG00000000977(CERS1),ENSBGRG00000001078(WNT10B),ENSBGRG00000001111(C9orf72),ENSBGRG00000001178(SGTA),ENSBGRG00000001485(NFX1),ENSBGRG00000001845(KAT2B),ENSBGRG00000001895(ZBTB20),ENSBGRG00000001901(FOXP2),ENSBGRG00000002070(GLIS1),ENSB…	0.00019552	0.0291884		ko04918	Thyroid hormone synthesis	Organismal Systems	Endocrine system	9	67	ENSBGRG00000004174(CANX),ENSBGRG00000023559(PRKACA),ENSBGRG00000001167(PRKACB),ENSBGRG00000000673(ADCY6),ENSBGRG00000018043(TPO),ENSBGRG00000015485(PAX8),ENSBGRG00000006083(SLC26A4),ENSBGRG00000020026(HSPA5),ENSBGRG00000021837(CGA)	0.121121	0.570997		BP	GO:0030100	regulation of endocytosis	12	381	0.00121545	0.0987573	ENSBGRG00000000266(PROS1),ENSBGRG00000005379(ATG5),ENSBGRG00000011372(BMP2K),ENSBGRG00000012411(LRBA),ENSBGRG00000014952(AGAP1),ENSBGRG00000016018(ABR),ENSBGRG00000016288(MAGI2),ENSBGRG00000016974(NBEA),ENSBGRG00000021365(PIK3C3),ENSBGRG00000021443(ANO6),ENSBGRG00000024381(EEF2K),ENSBGRG00000024679(PICALM)
BP	GO:0006807	nitrogen compound metabolic process	688	7007	ENSBGRG00000000004(VGLL3),ENSBGRG00000000061(GABPA),ENSBGRG00000000074(N6AMT1),ENSBGRG00000000197(EPHA3),ENSBGRG00000000203(DDOST),ENSBGRG00000000213(NFE2L2),ENSBGRG00000000221(F3),ENSBGRG00000000235,ENSBGRG00000000283(HP1BP3),ENSBGRG00000000285(CIART),ENSBGRG00000000351(EEPD1),ENSBGRG00000000405(MFSD2A),ENSBGRG00000000428(ATR),ENSBGRG00000000440(PYM1),ENSBGRG00000000461(NR4A3),ENSBGRG00000000535…	0.000206041	0.0298779		ko00562	Inositol phosphate metabolism	Metabolism	Carbohydrate metabolism	9	67	ENSBGRG00000014718(PIP4K2B),ENSBGRG00000007268(PIK3CG),ENSBGRG00000007913(PIP5KL1),ENSBGRG00000019275(PLCG2),ENSBGRG00000025069(INPP5J),ENSBGRG00000008560(MTMR14),ENSBGRG00000013464(PLCD1),ENSBGRG00000018890(PI4K2A),ENSBGRG00000021365(PIK3C3)	0.121121	0.570997		BP	GO:0014724	regulation of twitch skeletal muscle contraction	2	5	0.00121591	0.0987573	ENSBGRG00000007922(MYH6),ENSBGRG00000008351(MYH7)
BP	GO:0030154	cell differentiation	265	2434	ENSBGRG00000000061(GABPA),ENSBGRG00000000174,ENSBGRG00000000197(EPHA3),ENSBGRG00000000213(NFE2L2),ENSBGRG00000000215(PLCL2),ENSBGRG00000000405(MFSD2A),ENSBGRG00000000520(DPYSL2),ENSBGRG00000000682(CECR2),ENSBGRG00000000764(CDKN1B),ENSBGRG00000000770(ECE1),ENSBGRG00000000909(FSTL4),ENSBGRG00000001004(VDAC1),ENSBGRG00000001070(ATXN10),ENSBGRG00000001078(WNT10B),ENSBGRG00000001111(C9orf72),ENSBGRG00…	0.000208308	0.0298779		ko05143	African trypanosomiasis	Human Diseases	Infectious disease: parasitic	5	31	ENSBGRG00000007038(FASLG),ENSBGRG00000017283(FAS),ENSBGRG00000003668(APOA1),ENSBGRG00000016956(IL12B),ENSBGRG00000009260	0.124483	0.575826		BP	GO:0036369	transcription factor catabolic process	2	5	0.00121591	0.0987573	ENSBGRG00000012799(FBXW8),ENSBGRG00000013378(FEM1C)
MF	GO:1990837	sequence-specific double-stranded DNA binding	97	776	ENSBGRG00000000061(GABPA),ENSBGRG00000000213(NFE2L2),ENSBGRG00000000285(CIART),ENSBGRG00000001195(SP8),ENSBGRG00000001424(LONP1),ENSBGRG00000001485(NFX1),ENSBGRG00000001789(STAT1),ENSBGRG00000001845(KAT2B),ENSBGRG00000001895(ZBTB20),ENSBGRG00000001954(ZNF395),ENSBGRG00000002039(HOXA6),ENSBGRG00000002070(GLIS1),ENSBGRG00000002337(ETV5),ENSBGRG00000002486(XRCC5),ENSBGRG00000002538(SMAD5),ENSBGRG000…	0.00020842	0.0433812		ko04976	Bile secretion	Organismal Systems	Digestive system	9	68	ENSBGRG00000011055,ENSBGRG00000003951(AQP1),ENSBGRG00000020672(ABCG2),ENSBGRG00000012214(SCARB1),ENSBGRG00000003789(NCEH1),ENSBGRG00000005861(LDLR),ENSBGRG00000000673(ADCY6),ENSBGRG00000023559(PRKACA),ENSBGRG00000001167(PRKACB)	0.129577	0.575826		BP	GO:0051138	positive regulation of NK T cell differentiation	2	5	0.00121591	0.0987573	ENSBGRG00000021550(IKZF1),ENSBGRG00000024593(TGFBR2)
BP	GO:0009892	negative regulation of metabolic process	207	1842	ENSBGRG00000000061(GABPA),ENSBGRG00000000215(PLCL2),ENSBGRG00000000285(CIART),ENSBGRG00000000405(MFSD2A),ENSBGRG00000000428(ATR),ENSBGRG00000000440(PYM1),ENSBGRG00000000593(PRKAA2),ENSBGRG00000000764(CDKN1B),ENSBGRG00000000867(IKZF4),ENSBGRG00000000920(ZRANB3),ENSBGRG00000000962(MCL1),ENSBGRG00000000977(CERS1),ENSBGRG00000001004(VDAC1),ENSBGRG00000001078(WNT10B),ENSBGRG00000001111(C9orf72),ENSBGR…	0.000219246	0.0302788		ko04540	Gap junction	Cellular Processes	Cellular community - eukaryotes	9	68	ENSBGRG00000005672(SRC),ENSBGRG00000026030(TUBB4A),ENSBGRG00000000673(ADCY6),ENSBGRG00000001167(PRKACB),ENSBGRG00000023559(PRKACA),ENSBGRG00000023016(MAPK7),ENSBGRG00000001452(TUBA1B),ENSBGRG00000005984(CSNK1D),ENSBGRG00000002568(MAP3K2)	0.129577	0.575826		BP	GO:0061865	polarized secretion of basement membrane proteins in epithelium	2	5	0.00121591	0.0987573	ENSBGRG00000001896(DENND4C),ENSBGRG00000024953(DENND4A)
BP	GO:1902680	positive regulation of RNA biosynthetic process	132	1096	ENSBGRG00000000061(GABPA),ENSBGRG00000000213(NFE2L2),ENSBGRG00000000461(NR4A3),ENSBGRG00000000542(CRTC1),ENSBGRG00000000867(IKZF4),ENSBGRG00000001078(WNT10B),ENSBGRG00000001789(STAT1),ENSBGRG00000001845(KAT2B),ENSBGRG00000001892(ING5),ENSBGRG00000001954(ZNF395),ENSBGRG00000002070(GLIS1),ENSBGRG00000002309(LUM),ENSBGRG00000002337(ETV5),ENSBGRG00000002538(SMAD5),ENSBGRG00000002568(MAP3K2),ENSBGRG00…	0.000219381	0.0302788		ko04721	Synaptic vesicle cycle	Organismal Systems	Nervous system	9	68	ENSBGRG00000021286(NSF),ENSBGRG00000009889(ATP6V0A1),ENSBGRG00000005559(ATP6V1B1),ENSBGRG00000021305(CLTC),ENSBGRG00000005332(STXBP1),ENSBGRG00000019173(SLC18A2),ENSBGRG00000001479(ATP6V1A),ENSBGRG00000016741(SLC1A6),ENSBGRG00000024848	0.129577	0.575826		BP	GO:0110010	basolateral protein secretion	2	5	0.00121591	0.0987573	ENSBGRG00000001896(DENND4C),ENSBGRG00000024953(DENND4A)
BP	GO:0002684	positive regulation of immune system process	77	576	ENSBGRG00000000215(PLCL2),ENSBGRG00000001078(WNT10B),ENSBGRG00000001621(AQP3),ENSBGRG00000001666(CASP6),ENSBGRG00000001789(STAT1),ENSBGRG00000002134(CAV1),ENSBGRG00000002486(XRCC5),ENSBGRG00000002633(PPP3CA),ENSBGRG00000002683(IL13),ENSBGRG00000002944(TOMM70),ENSBGRG00000003405(NOD1),ENSBGRG00000003430(C1QC),ENSBGRG00000004203(SEMA7A),ENSBGRG00000004407(TAFA3),ENSBGRG00000004989(ACVR2A),ENSBGRG00…	0.000233559	0.0310821		ko04062	Chemokine signaling pathway	Organismal Systems	Immune system	18	157	ENSBGRG00000007174(FOXO3),ENSBGRG00000015837(CXCL9),ENSBGRG00000007268(PIK3CG),ENSBGRG00000016094(CCL28),ENSBGRG00000012992,ENSBGRG00000026668(PIK3R6),ENSBGRG00000004554(VAV2),ENSBGRG00000018824(CXCL12),ENSBGRG00000013724(GRK4),ENSBGRG00000019275(PLCG2),ENSBGRG00000005168,ENSBGRG00000005672(SRC),ENSBGRG00000001789(STAT1),ENSBGRG00000010021(CCL20),ENSBGRG00000010257(STAT3),ENSBGRG00000000673(ADCY6…	0.13087	0.575826		BP	GO:0007030	Golgi organization	8	187	0.00121718	0.0987573	ENSBGRG00000005984(CSNK1D),ENSBGRG00000011855(ATP8B1),ENSBGRG00000012550(ATP8B4),ENSBGRG00000012799(FBXW8),ENSBGRG00000016018(ABR),ENSBGRG00000019601(CAMSAP2),ENSBGRG00000021132(VMP1),ENSBGRG00000025394(NPLOC4)
BP	GO:0048519	negative regulation of biological process	351	3338	ENSBGRG00000000061(GABPA),ENSBGRG00000000197(EPHA3),ENSBGRG00000000213(NFE2L2),ENSBGRG00000000215(PLCL2),ENSBGRG00000000266(PROS1),ENSBGRG00000000285(CIART),ENSBGRG00000000405(MFSD2A),ENSBGRG00000000428(ATR),ENSBGRG00000000440(PYM1),ENSBGRG00000000542(CRTC1),ENSBGRG00000000593(PRKAA2),ENSBGRG00000000764(CDKN1B),ENSBGRG00000000766(TRIM35),ENSBGRG00000000867(IKZF4),ENSBGRG00000000909(FSTL4),ENSBGRG…	0.0002337	0.0310821		ko04211	Longevity regulating pathway	Organismal Systems	Aging	10	78	ENSBGRG00000023559(PRKACA),ENSBGRG00000001167(PRKACB),ENSBGRG00000000673(ADCY6),ENSBGRG00000000593(PRKAA2),ENSBGRG00000001150(PRKAG1),ENSBGRG00000014262(PPARGC1A),ENSBGRG00000013814(STK11),ENSBGRG00000016630(PRKAB1),ENSBGRG00000010942(PRKAB2),ENSBGRG00000007174(FOXO3)	0.133298	0.578795		BP	GO:0032989	cellular component morphogenesis	32	1642	0.00124259	0.0987573	ENSBGRG00000001761(IFRD1),ENSBGRG00000002518(DDR2),ENSBGRG00000002824(USP33),ENSBGRG00000003783(SPTB),ENSBGRG00000003960(ENAH),ENSBGRG00000005231(NIBAN2),ENSBGRG00000006060(IGF1R),ENSBGRG00000006248(PIKFYVE),ENSBGRG00000007622(SMAD1),ENSBGRG00000008613(ENSBGRG00000008613),ENSBGRG00000009644(PPP1R9A),ENSBGRG00000010459(CDK19),ENSBGRG00000011253(EHMT1),ENSBGRG00000011372(BMP2K),ENSBGRG00000012099(L…
BP	GO:0048858	cell projection morphogenesis	53	362	ENSBGRG00000000405(MFSD2A),ENSBGRG00000000520(DPYSL2),ENSBGRG00000000770(ECE1),ENSBGRG00000000909(FSTL4),ENSBGRG00000001111(C9orf72),ENSBGRG00000001761(IFRD1),ENSBGRG00000001923(GAP43),ENSBGRG00000002594(GLI2),ENSBGRG00000002633(PPP3CA),ENSBGRG00000003262(TMEM106B),ENSBGRG00000004157(UGT8),ENSBGRG00000004203(SEMA7A),ENSBGRG00000005119(TTC8),ENSBGRG00000005329(OTX2),ENSBGRG00000005332(STXBP1),ENSB…	0.00024858	0.0324708		ko05222	Small cell lung cancer	Human Diseases	Cancer: specific types	11	88	ENSBGRG00000016285,ENSBGRG00000018786(PTGS2),ENSBGRG00000013000(NOS2),ENSBGRG00000000764(CDKN1B),ENSBGRG00000021026(COL4A6),ENSBGRG00000009568(LAMC3),ENSBGRG00000016632(LAMB2),ENSBGRG00000010970(ITGA6),ENSBGRG00000022326(TRAF5),ENSBGRG00000005405,ENSBGRG00000020100(RB1)	0.135795	0.581978		BP	GO:0046907	intracellular transport	37	1999	0.00126372	0.0987573	ENSBGRG00000000266(PROS1),ENSBGRG00000000629(GNPTAB),ENSBGRG00000001141(ABCA1),ENSBGRG00000001484(SEC24B),ENSBGRG00000002944(TOMM70),ENSBGRG00000003322(WDR33),ENSBGRG00000003783(SPTB),ENSBGRG00000003960(ENAH),ENSBGRG00000004274(RABGAP1L),ENSBGRG00000004626(CBLB),ENSBGRG00000005235(TENT2),ENSBGRG00000005343(ENSBGRG00000005343),ENSBGRG00000005984(CSNK1D),ENSBGRG00000006051(CDC42BPA),ENSBGRG00000006…
MF	GO:0003690	double-stranded DNA binding	101	819	ENSBGRG00000000061(GABPA),ENSBGRG00000000213(NFE2L2),ENSBGRG00000000285(CIART),ENSBGRG00000001195(SP8),ENSBGRG00000001424(LONP1),ENSBGRG00000001485(NFX1),ENSBGRG00000001789(STAT1),ENSBGRG00000001845(KAT2B),ENSBGRG00000001895(ZBTB20),ENSBGRG00000001954(ZNF395),ENSBGRG00000002039(HOXA6),ENSBGRG00000002070(GLIS1),ENSBGRG00000002337(ETV5),ENSBGRG00000002486(XRCC5),ENSBGRG00000002538(SMAD5),ENSBGRG000…	0.00025479	0.0455237		ko04962	Vasopressin-regulated water reabsorption	Organismal Systems	Excretory system	6	42	ENSBGRG00000021286(NSF),ENSBGRG00000000673(ADCY6),ENSBGRG00000001621(AQP3),ENSBGRG00000023559(PRKACA),ENSBGRG00000001167(PRKACB),ENSBGRG00000019097(DYNC2H1)	0.150496	0.628584		MF	GO:0008559	ATPase-coupled xenobiotic transmembrane transporter activity	2	5	0.00126803	0.0366577	ENSBGRG00000020672(ABCG2),ENSBGRG00000023586(ABCC1)
BP	GO:2000209	regulation of anoikis	7	16	ENSBGRG00000000962(MCL1),ENSBGRG00000002134(CAV1),ENSBGRG00000004372(NTRK2),ENSBGRG00000004717(ITGA5),ENSBGRG00000005513(ANKRD13C),ENSBGRG00000005672(SRC),ENSBGRG00000008799(PDK4)	0.000255315	0.0327655		ko04510	Focal adhesion	Cellular Processes	Cellular community - eukaryotes	20	181	ENSBGRG00000005405,ENSBGRG00000021026(COL4A6),ENSBGRG00000013466(COL1A2),ENSBGRG00000017890(THBS3),ENSBGRG00000004717(ITGA5),ENSBGRG00000006109(FLT4),ENSBGRG00000010970(ITGA6),ENSBGRG00000019063(RASGRF1),ENSBGRG00000016632(LAMB2),ENSBGRG00000022165(COL9A1),ENSBGRG00000005672(SRC),ENSBGRG00000005168,ENSBGRG00000009568(LAMC3),ENSBGRG00000020277(IBSP),ENSBGRG00000004554(VAV2),ENSBGRG00000013023(RAPG…	0.150707	0.628584		MF	GO:0046976	histone methyltransferase activity (H3-K27 specific)	2	5	0.00126803	0.0366577	ENSBGRG00000011253(EHMT1),ENSBGRG00000016971(NSD3)
BP	GO:0043412	macromolecule modification	295	2755	ENSBGRG00000000074(N6AMT1),ENSBGRG00000000197(EPHA3),ENSBGRG00000000203(DDOST),ENSBGRG00000000213(NFE2L2),ENSBGRG00000000428(ATR),ENSBGRG00000000593(PRKAA2),ENSBGRG00000000711(METAP2),ENSBGRG00000000726(PPIE),ENSBGRG00000000764(CDKN1B),ENSBGRG00000000918(STK36),ENSBGRG00000001111(C9orf72),ENSBGRG00000001150(PRKAG1),ENSBGRG00000001167(PRKACB),ENSBGRG00000001329(STK17B),ENSBGRG00000001422(RPAP2),EN…	0.000267024	0.0335493		ko04110	Cell cycle	Cellular Processes	Cell growth and death	14	120	ENSBGRG00000003311(ANAPC13),ENSBGRG00000003952(RAD21),ENSBGRG00000000428(ATR),ENSBGRG00000025518(BUB3),ENSBGRG00000007914(CDC14A),ENSBGRG00000010293(ANAPC2),ENSBGRG00000000764(CDKN1B),ENSBGRG00000024969(RBL2),ENSBGRG00000005070(ORC4),ENSBGRG00000019376(YWHAH),ENSBGRG00000020100(RB1),ENSBGRG00000014113(ATM),ENSBGRG00000007727(CDKN2C),ENSBGRG00000024537(SMAD4)	0.152384	0.628584		MF	GO:0017112	Rab guanyl-nucleotide exchange factor activity	4	42	0.0013092	0.0366577	ENSBGRG00000001896(DENND4C),ENSBGRG00000004086(DENND5B),ENSBGRG00000007364(DENND2B),ENSBGRG00000024953(DENND4A)
BP	GO:0007389	pattern specification process	48	320	ENSBGRG00000001167(PRKACB),ENSBGRG00000001195(SP8),ENSBGRG00000002039(HOXA6),ENSBGRG00000002249(DZIP1L),ENSBGRG00000002594(GLI2),ENSBGRG00000003766(HOXC13),ENSBGRG00000003786(MYF6),ENSBGRG00000004989(ACVR2A),ENSBGRG00000005119(TTC8),ENSBGRG00000006338(PCDH8),ENSBGRG00000006480(SIX3),ENSBGRG00000008234(DMRTA2),ENSBGRG00000008619(SIX1),ENSBGRG00000008954(BPTF),ENSBGRG00000009659(RNF111),ENSBGRG0000…	0.000272326	0.0335493		ko04217	Necroptosis	Cellular Processes	Cell growth and death	16	141	ENSBGRG00000000131(IFNAR2),ENSBGRG00000007092,ENSBGRG00000007038(FASLG),ENSBGRG00000025402(ALOX15),ENSBGRG00000005223(PARP1),ENSBGRG00000001451(CHMP5),ENSBGRG00000017843(H2AZ2),ENSBGRG00000001004(VDAC1),ENSBGRG00000022326(TRAF5),ENSBGRG00000010257(STAT3),ENSBGRG00000022744(PYCARD),ENSBGRG00000017283(FAS),ENSBGRG00000010846(STAT5A),ENSBGRG00000021420(CAMK2A),ENSBGRG00000001789(STAT1),ENSBGRG000000…	0.15731	0.630401		BP	GO:0048699	generation of neurons	42	2372	0.00134306	0.103049	ENSBGRG00000001761(IFRD1),ENSBGRG00000002518(DDR2),ENSBGRG00000002824(USP33),ENSBGRG00000003783(SPTB),ENSBGRG00000003960(ENAH),ENSBGRG00000004626(CBLB),ENSBGRG00000005231(NIBAN2),ENSBGRG00000005235(TENT2),ENSBGRG00000005984(CSNK1D),ENSBGRG00000006060(IGF1R),ENSBGRG00000007622(SMAD1),ENSBGRG00000008613(ENSBGRG00000008613),ENSBGRG00000009140(PRKCH),ENSBGRG00000009278(TMEM67),ENSBGRG00000009644(PPP1…
BP	GO:0010605	negative regulation of macromolecule metabolic process	193	1708	ENSBGRG00000000061(GABPA),ENSBGRG00000000285(CIART),ENSBGRG00000000428(ATR),ENSBGRG00000000440(PYM1),ENSBGRG00000000593(PRKAA2),ENSBGRG00000000764(CDKN1B),ENSBGRG00000000867(IKZF4),ENSBGRG00000000920(ZRANB3),ENSBGRG00000000977(CERS1),ENSBGRG00000001078(WNT10B),ENSBGRG00000001111(C9orf72),ENSBGRG00000001178(SGTA),ENSBGRG00000001485(NFX1),ENSBGRG00000001845(KAT2B),ENSBGRG00000001895(ZBTB20),ENSBGRG…	0.00027733	0.0335493		ko04340	Hedgehog signaling pathway	Environmental Information Processing	Signal transduction	7	52	ENSBGRG00000005984(CSNK1D),ENSBGRG00000002594(GLI2),ENSBGRG00000022727(HHAT),ENSBGRG00000023559(PRKACA),ENSBGRG00000001167(PRKACB),ENSBGRG00000009467(CSNK1G3),ENSBGRG00000002563(KIF3A)	0.158457	0.630401		BP	GO:1904375	regulation of protein localization to cell periphery	7	148	0.00138166	0.104118	ENSBGRG00000001896(DENND4C),ENSBGRG00000009140(PRKCH),ENSBGRG00000015284(SPTBN1),ENSBGRG00000016568(ACSL3),ENSBGRG00000020056(DLG1),ENSBGRG00000024679(PICALM),ENSBGRG00000024953(DENND4A)
BP	GO:0000902	cell morphogenesis	80	607	ENSBGRG00000000405(MFSD2A),ENSBGRG00000000520(DPYSL2),ENSBGRG00000000770(ECE1),ENSBGRG00000000909(FSTL4),ENSBGRG00000001111(C9orf72),ENSBGRG00000001761(IFRD1),ENSBGRG00000001905(TBCCD1),ENSBGRG00000001923(GAP43),ENSBGRG00000001929(EPS8),ENSBGRG00000002594(GLI2),ENSBGRG00000002633(PPP3CA),ENSBGRG00000003262(TMEM106B),ENSBGRG00000003668(APOA1),ENSBGRG00000004157(UGT8),ENSBGRG00000004203(SEMA7A),ENS…	0.00027993	0.0335493		ko03040	Spliceosome	Genetic Information Processing	Transcription	15	131	ENSBGRG00000017071(SMNDC1),ENSBGRG00000012681,ENSBGRG00000022802(FUS),ENSBGRG00000012999(PRPF6),ENSBGRG00000024701(U2AF1L4),ENSBGRG00000019513(NCBP2),ENSBGRG00000004955(SNRNP27),ENSBGRG00000011891(SRSF6),ENSBGRG00000015903,ENSBGRG00000017265,ENSBGRG00000014814(RBM25),ENSBGRG00000018777(THOC1),ENSBGRG00000001771(DDX46),ENSBGRG00000000726(PPIE),ENSBGRG00000015169(SRSF1)	0.158555	0.630401		BP	GO:0051130	positive regulation of cellular component organization	31	1587	0.0014418	0.106047	ENSBGRG00000000266(PROS1),ENSBGRG00000002158(HMBOX1),ENSBGRG00000002518(DDR2),ENSBGRG00000003960(ENAH),ENSBGRG00000005235(TENT2),ENSBGRG00000005984(CSNK1D),ENSBGRG00000006060(IGF1R),ENSBGRG00000007622(SMAD1),ENSBGRG00000008613(ENSBGRG00000008613),ENSBGRG00000009278(TMEM67),ENSBGRG00000009644(PPP1R9A),ENSBGRG00000011253(EHMT1),ENSBGRG00000012411(LRBA),ENSBGRG00000012799(FBXW8),ENSBGRG00000013584(N…
MF	GO:0000977	RNA polymerase II transcription regulatory region sequence-specific DNA binding	68	508	ENSBGRG00000000061(GABPA),ENSBGRG00000000213(NFE2L2),ENSBGRG00000000285(CIART),ENSBGRG00000001485(NFX1),ENSBGRG00000001789(STAT1),ENSBGRG00000001845(KAT2B),ENSBGRG00000001954(ZNF395),ENSBGRG00000002070(GLIS1),ENSBGRG00000002337(ETV5),ENSBGRG00000002538(SMAD5),ENSBGRG00000002594(GLI2),ENSBGRG00000002783(RORC),ENSBGRG00000003613(PBX3),ENSBGRG00000003739(ETS2),ENSBGRG00000004012(PAX9),ENSBGRG0000000…	0.000281203	0.0455237		ko04392	Hippo signaling pathway - multiple species	Environmental Information Processing	Signal transduction	4	25	ENSBGRG00000017841(DCHS2),ENSBGRG00000010323(MOB1A),ENSBGRG00000009024,ENSBGRG00000005204(AJUBA)	0.164931	0.642035		BP	GO:0044267	cellular protein metabolic process	79	5331	0.00145752	0.106047	ENSBGRG00000000262(BOLL),ENSBGRG00000000266(PROS1),ENSBGRG00000001141(ABCA1),ENSBGRG00000002321(FBXO42),ENSBGRG00000002518(DDR2),ENSBGRG00000002824(USP33),ENSBGRG00000003783(SPTB),ENSBGRG00000004149(PTBP3),ENSBGRG00000004461(LRRK1),ENSBGRG00000004626(CBLB),ENSBGRG00000005379(ATG5),ENSBGRG00000005459(PRDM5),ENSBGRG00000005984(CSNK1D),ENSBGRG00000006051(CDC42BPA),ENSBGRG00000006060(IGF1R),ENSBGRG00…
BP	GO:0042476	odontogenesis	19	89	ENSBGRG00000001621(AQP3),ENSBGRG00000002594(GLI2),ENSBGRG00000003951(AQP1),ENSBGRG00000004012(PAX9),ENSBGRG00000004042(OSR2),ENSBGRG00000004899(DLX3),ENSBGRG00000004989(ACVR2A),ENSBGRG00000005672(SRC),ENSBGRG00000006002(JAG2),ENSBGRG00000010388(MSX1),ENSBGRG00000010658(DLX1),ENSBGRG00000010765(DLX2),ENSBGRG00000013920(NECTIN1),ENSBGRG00000016842(ACP4),ENSBGRG00000017213(WDR72),ENSBGRG00000019829(…	0.000287247	0.0335493		ko00780	Biotin metabolism	Metabolism	Metabolism of cofactors and vitamins	1	2	ENSBGRG00000003161(HLCS)	0.165373	0.642035		BP	GO:0015833	peptide transport	37	2021	0.00153997	0.108688	ENSBGRG00000000629(GNPTAB),ENSBGRG00000001141(ABCA1),ENSBGRG00000001728(ITPR2),ENSBGRG00000001896(DENND4C),ENSBGRG00000002944(TOMM70),ENSBGRG00000003322(WDR33),ENSBGRG00000004274(RABGAP1L),ENSBGRG00000004626(CBLB),ENSBGRG00000005343(ENSBGRG00000005343),ENSBGRG00000005379(ATG5),ENSBGRG00000005984(CSNK1D),ENSBGRG00000006060(IGF1R),ENSBGRG00000007817(ATP6V1C1),ENSBGRG00000008227(UBR5),ENSBGRG0000000…
BP	GO:0043276	anoikis	8	21	ENSBGRG00000000962(MCL1),ENSBGRG00000002134(CAV1),ENSBGRG00000004372(NTRK2),ENSBGRG00000004717(ITGA5),ENSBGRG00000005513(ANKRD13C),ENSBGRG00000005672(SRC),ENSBGRG00000008799(PDK4),ENSBGRG00000013814(STK11)	0.000288941	0.0335493		ko04064	NF-kappa B signaling pathway	Environmental Information Processing	Signal transduction	12	103	ENSBGRG00000009260,ENSBGRG00000020072(EDARADD),ENSBGRG00000022867(CARD11),ENSBGRG00000006318,ENSBGRG00000016285,ENSBGRG00000018786(PTGS2),ENSBGRG00000014113(ATM),ENSBGRG00000022326(TRAF5),ENSBGRG00000005223(PARP1),ENSBGRG00000009042(RIPK1),ENSBGRG00000018824(CXCL12),ENSBGRG00000019275(PLCG2)	0.176782	0.678349		BP	GO:0015031	protein transport	36	1952	0.00158698	0.108688	ENSBGRG00000000629(GNPTAB),ENSBGRG00000001141(ABCA1),ENSBGRG00000001728(ITPR2),ENSBGRG00000001896(DENND4C),ENSBGRG00000002944(TOMM70),ENSBGRG00000003322(WDR33),ENSBGRG00000004274(RABGAP1L),ENSBGRG00000004626(CBLB),ENSBGRG00000005343(ENSBGRG00000005343),ENSBGRG00000005379(ATG5),ENSBGRG00000005984(CSNK1D),ENSBGRG00000006060(IGF1R),ENSBGRG00000007817(ATP6V1C1),ENSBGRG00000008227(UBR5),ENSBGRG0000000…
BP	GO:2000811	negative regulation of anoikis	6	12	ENSBGRG00000000962(MCL1),ENSBGRG00000002134(CAV1),ENSBGRG00000004372(NTRK2),ENSBGRG00000004717(ITGA5),ENSBGRG00000005672(SRC),ENSBGRG00000008799(PDK4)	0.000296943	0.0336681		ko03450	Non-homologous end-joining	Genetic Information Processing	Replication and repair	2	9	ENSBGRG00000021342(MRE11),ENSBGRG00000002486(XRCC5)	0.179167	0.679597		BP	GO:0048667	cell morphogenesis involved in neuron differentiation	24	1122	0.00161472	0.108688	ENSBGRG00000001761(IFRD1),ENSBGRG00000002518(DDR2),ENSBGRG00000002824(USP33),ENSBGRG00000003783(SPTB),ENSBGRG00000003960(ENAH),ENSBGRG00000005231(NIBAN2),ENSBGRG00000006060(IGF1R),ENSBGRG00000007622(SMAD1),ENSBGRG00000009644(PPP1R9A),ENSBGRG00000010459(CDK19),ENSBGRG00000011253(EHMT1),ENSBGRG00000011372(BMP2K),ENSBGRG00000012099(LAMA2),ENSBGRG00000012463(RERE),ENSBGRG00000012799(FBXW8),ENSBGRG000…
BP	GO:1903979	negative regulation of microglial cell activation	4	5	ENSBGRG00000004407(TAFA3),ENSBGRG00000005861(LDLR),ENSBGRG00000008014(CST7),ENSBGRG00000020463(NR1D1)	0.000300031	0.0336681		ko00565	Ether lipid metabolism	Metabolism	Lipid metabolism	6	45	ENSBGRG00000000237(AGPS),ENSBGRG00000020412(PLD3),ENSBGRG00000005175,ENSBGRG00000005071,ENSBGRG00000003271(CEPT1),ENSBGRG00000004157(UGT8)	0.189261	0.695478		BP	GO:0043087	regulation of GTPase activity	13	449	0.00163488	0.108688	ENSBGRG00000000973(FGD6),ENSBGRG00000001896(DENND4C),ENSBGRG00000004274(RABGAP1L),ENSBGRG00000011309(ARHGAP18),ENSBGRG00000013023(RAPGEF1),ENSBGRG00000014952(AGAP1),ENSBGRG00000015822(RABGAP1),ENSBGRG00000016018(ABR),ENSBGRG00000017494(DOCK11),ENSBGRG00000018618(DOCK7),ENSBGRG00000022862(DOCK9),ENSBGRG00000024679(PICALM),ENSBGRG00000024953(DENND4A)
BP	GO:0006355	regulation of transcription, DNA-templated	247	2262	ENSBGRG00000000004(VGLL3),ENSBGRG00000000061(GABPA),ENSBGRG00000000213(NFE2L2),ENSBGRG00000000235,ENSBGRG00000000283(HP1BP3),ENSBGRG00000000285(CIART),ENSBGRG00000000461(NR4A3),ENSBGRG00000000535,ENSBGRG00000000542(CRTC1),ENSBGRG00000000726(PPIE),ENSBGRG00000000764(CDKN1B),ENSBGRG00000000867(IKZF4),ENSBGRG00000000918(STK36),ENSBGRG00000001078(WNT10B),ENSBGRG00000001422(RPAP2),ENSBGRG00000001485(N…	0.000303772	0.0336681		ko05030	Cocaine addiction	Human Diseases	Substance dependence	6	45	ENSBGRG00000023559(PRKACA),ENSBGRG00000001167(PRKACB),ENSBGRG00000022164(FOSB),ENSBGRG00000010593(PDYN),ENSBGRG00000019173(SLC18A2),ENSBGRG00000013578	0.189261	0.695478		BP	GO:0071840	cellular component organization or biogenesis	101	7261	0.00163788	0.108688	ENSBGRG00000000139(SON),ENSBGRG00000000266(PROS1),ENSBGRG00000000599(ENSBGRG00000000599),ENSBGRG00000000629(GNPTAB),ENSBGRG00000000973(FGD6),ENSBGRG00000001141(ABCA1),ENSBGRG00000001484(SEC24B),ENSBGRG00000001761(IFRD1),ENSBGRG00000001896(DENND4C),ENSBGRG00000002158(HMBOX1),ENSBGRG00000002518(DDR2),ENSBGRG00000002693(APBB2),ENSBGRG00000002824(USP33),ENSBGRG00000002944(TOMM70),ENSBGRG00000003783(S…
BP	GO:1903506	regulation of nucleic acid-templated transcription	247	2265	ENSBGRG00000000004(VGLL3),ENSBGRG00000000061(GABPA),ENSBGRG00000000213(NFE2L2),ENSBGRG00000000235,ENSBGRG00000000283(HP1BP3),ENSBGRG00000000285(CIART),ENSBGRG00000000461(NR4A3),ENSBGRG00000000535,ENSBGRG00000000542(CRTC1),ENSBGRG00000000726(PPIE),ENSBGRG00000000764(CDKN1B),ENSBGRG00000000867(IKZF4),ENSBGRG00000000918(STK36),ENSBGRG00000001078(WNT10B),ENSBGRG00000001422(RPAP2),ENSBGRG00000001485(N…	0.000329844	0.036012		ko05203	Viral carcinogenesis	Human Diseases	Cancer: overview	19	177	ENSBGRG00000011453,ENSBGRG00000023300(SND1),ENSBGRG00000005672(SRC),ENSBGRG00000022326(TRAF5),ENSBGRG00000002796(HDAC10),ENSBGRG00000015126(DNAJA3),ENSBGRG00000001845(KAT2B),ENSBGRG00000008564,ENSBGRG00000000764(CDKN1B),ENSBGRG00000010257(STAT3),ENSBGRG00000001167(PRKACB),ENSBGRG00000023559(PRKACA),ENSBGRG00000024969(RBL2),ENSBGRG00000016090(MAPKAPK2),ENSBGRG00000004281(HDAC5),ENSBGRG00000013085(…	0.190086	0.695478		BP	GO:0046578	regulation of Ras protein signal transduction	9	243	0.00167124	0.108688	ENSBGRG00000001141(ABCA1),ENSBGRG00000001896(DENND4C),ENSBGRG00000004086(DENND5B),ENSBGRG00000016018(ABR),ENSBGRG00000017494(DOCK11),ENSBGRG00000018618(DOCK7),ENSBGRG00000022862(DOCK9),ENSBGRG00000022891(RAF1),ENSBGRG00000024953(DENND4A)
BP	GO:0032501	multicellular organismal process	444	4350	ENSBGRG00000000061(GABPA),ENSBGRG00000000174,ENSBGRG00000000197(EPHA3),ENSBGRG00000000213(NFE2L2),ENSBGRG00000000215(PLCL2),ENSBGRG00000000221(F3),ENSBGRG00000000266(PROS1),ENSBGRG00000000276(HERPUD2),ENSBGRG00000000285(CIART),ENSBGRG00000000405(MFSD2A),ENSBGRG00000000520(DPYSL2),ENSBGRG00000000542(CRTC1),ENSBGRG00000000673(ADCY6),ENSBGRG00000000682(CECR2),ENSBGRG00000000764(CDKN1B),ENSBGRG000000…	0.000354933	0.0381814		ko05225	Hepatocellular carcinoma	Human Diseases	Cancer: specific types	16	146	ENSBGRG00000019557(WNT5B),ENSBGRG00000004107(SMARCA2),ENSBGRG00000007688(FZD6),ENSBGRG00000005168,ENSBGRG00000003295(MGST3),ENSBGRG00000017707(SMARCC1),ENSBGRG00000016285,ENSBGRG00000000213(NFE2L2),ENSBGRG00000022014,ENSBGRG00000019275(PLCG2),ENSBGRG00000001078(WNT10B),ENSBGRG00000002112(GSTM3),ENSBGRG00000002079,ENSBGRG00000020100(RB1),ENSBGRG00000024537(SMAD4),ENSBGRG00000012559(DVL1)	0.192302	0.695478		BP	GO:0032501	multicellular organismal process	118	8817	0.0016741	0.108688	ENSBGRG00000000262(BOLL),ENSBGRG00000000266(PROS1),ENSBGRG00000000599(ENSBGRG00000000599),ENSBGRG00000000629(GNPTAB),ENSBGRG00000001023(TBXAS1),ENSBGRG00000001141(ABCA1),ENSBGRG00000001728(ITPR2),ENSBGRG00000001761(IFRD1),ENSBGRG00000002518(DDR2),ENSBGRG00000002693(APBB2),ENSBGRG00000002824(USP33),ENSBGRG00000002944(TOMM70),ENSBGRG00000003322(WDR33),ENSBGRG00000003783(SPTB),ENSBGRG00000003960(ENA…
BP	GO:0030182	neuron differentiation	99	791	ENSBGRG00000000197(EPHA3),ENSBGRG00000000405(MFSD2A),ENSBGRG00000000520(DPYSL2),ENSBGRG00000000682(CECR2),ENSBGRG00000000770(ECE1),ENSBGRG00000000909(FSTL4),ENSBGRG00000001070(ATXN10),ENSBGRG00000001111(C9orf72),ENSBGRG00000001761(IFRD1),ENSBGRG00000001923(GAP43),ENSBGRG00000002594(GLI2),ENSBGRG00000002633(PPP3CA),ENSBGRG00000003262(TMEM106B),ENSBGRG00000003498(VWC2L),ENSBGRG00000003613(PBX3),ENS…	0.000370442	0.0391363		ko04672	Intestinal immune network for IgA production	Organismal Systems	Immune system	7	55	ENSBGRG00000026415(TNFRSF17),ENSBGRG00000022452,ENSBGRG00000009260,ENSBGRG00000018824(CXCL12),ENSBGRG00000012246(ICOS),ENSBGRG00000016094(CCL28),ENSBGRG00000009800(AICDA)	0.193891	0.695478		MF	GO:0035639	purine ribonucleoside triphosphate binding	15	554	0.0017021	0.0447469	ENSBGRG00000001141(ABCA1),ENSBGRG00000006051(CDC42BPA),ENSBGRG00000006060(IGF1R),ENSBGRG00000008351(MYH7),ENSBGRG00000008463(TLK1),ENSBGRG00000010412(ATP2A2),ENSBGRG00000011586(ERCC6),ENSBGRG00000012475(EEFSEC),ENSBGRG00000014876(ATP7B),ENSBGRG00000015847(PDS5B),ENSBGRG00000020282(SMARCA5),ENSBGRG00000020672(ABCG2),ENSBGRG00000022891(RAF1),ENSBGRG00000023586(ABCC1),ENSBGRG00000026591(ENSBGRG00000…
MF	GO:0016301	kinase activity	82	645	ENSBGRG00000000197(EPHA3),ENSBGRG00000000428(ATR),ENSBGRG00000000593(PRKAA2),ENSBGRG00000000918(STK36),ENSBGRG00000001150(PRKAG1),ENSBGRG00000001167(PRKACB),ENSBGRG00000001329(STK17B),ENSBGRG00000001473(GUCY2C),ENSBGRG00000001869(DTYMK),ENSBGRG00000001978(TGFBR3),ENSBGRG00000002568(MAP3K2),ENSBGRG00000003065(AK5),ENSBGRG00000004372(NTRK2),ENSBGRG00000004498(PFKP),ENSBGRG00000004732(AAK1),ENSBGRG0…	0.000377491	0.0550004		ko04140	Autophagy - animal	Cellular Processes	Transport and catabolism	14	126	ENSBGRG00000005913(DAPK1),ENSBGRG00000008560(MTMR14),ENSBGRG00000023559(PRKACA),ENSBGRG00000001167(PRKACB),ENSBGRG00000021811(ATG9A),ENSBGRG00000000593(PRKAA2),ENSBGRG00000020889(ATG4A),ENSBGRG00000001111(C9orf72),ENSBGRG00000013814(STK11),ENSBGRG00000007092,ENSBGRG00000013027(RAB7A),ENSBGRG00000021365(PIK3C3),ENSBGRG00000016285,ENSBGRG00000006363(WDR41)	0.197845	0.702032		BP	GO:0000902	cell morphogenesis	31	1605	0.00172476	0.108811	ENSBGRG00000000973(FGD6),ENSBGRG00000001761(IFRD1),ENSBGRG00000002518(DDR2),ENSBGRG00000002824(USP33),ENSBGRG00000003783(SPTB),ENSBGRG00000003960(ENAH),ENSBGRG00000005231(NIBAN2),ENSBGRG00000005984(CSNK1D),ENSBGRG00000006060(IGF1R),ENSBGRG00000007598(ZRANB1),ENSBGRG00000007622(SMAD1),ENSBGRG00000008613(ENSBGRG00000008613),ENSBGRG00000009644(PPP1R9A),ENSBGRG00000010459(CDK19),ENSBGRG00000011253(EH…
BP	GO:2001141	regulation of RNA biosynthetic process	247	2270	ENSBGRG00000000004(VGLL3),ENSBGRG00000000061(GABPA),ENSBGRG00000000213(NFE2L2),ENSBGRG00000000235,ENSBGRG00000000283(HP1BP3),ENSBGRG00000000285(CIART),ENSBGRG00000000461(NR4A3),ENSBGRG00000000535,ENSBGRG00000000542(CRTC1),ENSBGRG00000000726(PPIE),ENSBGRG00000000764(CDKN1B),ENSBGRG00000000867(IKZF4),ENSBGRG00000000918(STK36),ENSBGRG00000001078(WNT10B),ENSBGRG00000001422(RPAP2),ENSBGRG00000001485(N…	0.000377913	0.0391363		ko05160	Hepatitis C	Human Diseases	Infectious disease: viral	15	137	ENSBGRG00000019376(YWHAH),ENSBGRG00000020100(RB1),ENSBGRG00000001789(STAT1),ENSBGRG00000009042(RIPK1),ENSBGRG00000017283(FAS),ENSBGRG00000009912(PPP2R1B),ENSBGRG00000010257(STAT3),ENSBGRG00000005861(LDLR),ENSBGRG00000014066(MX1),ENSBGRG00000003111(CLDN14),ENSBGRG00000007038(FASLG),ENSBGRG00000012214(SCARB1),ENSBGRG00000013226(PPP2R2C),ENSBGRG00000000131(IFNAR2),ENSBGRG00000022493(PIAS1)	0.202885	0.711546		BP	GO:0120036	plasma membrane bounded cell projection organization	38	2107	0.00172757	0.108811	ENSBGRG00000000973(FGD6),ENSBGRG00000001761(IFRD1),ENSBGRG00000002518(DDR2),ENSBGRG00000002824(USP33),ENSBGRG00000003783(SPTB),ENSBGRG00000003960(ENAH),ENSBGRG00000005231(NIBAN2),ENSBGRG00000005379(ATG5),ENSBGRG00000005984(CSNK1D),ENSBGRG00000006060(IGF1R),ENSBGRG00000007622(SMAD1),ENSBGRG00000008613(ENSBGRG00000008613),ENSBGRG00000009278(TMEM67),ENSBGRG00000009644(PPP1R9A),ENSBGRG00000010459(CDK…
BP	GO:0030030	cell projection organization	112	916	ENSBGRG00000000197(EPHA3),ENSBGRG00000000405(MFSD2A),ENSBGRG00000000520(DPYSL2),ENSBGRG00000000645(GMNC),ENSBGRG00000000682(CECR2),ENSBGRG00000000770(ECE1),ENSBGRG00000000909(FSTL4),ENSBGRG00000000918(STK36),ENSBGRG00000001070(ATXN10),ENSBGRG00000001111(C9orf72),ENSBGRG00000001761(IFRD1),ENSBGRG00000001923(GAP43),ENSBGRG00000002134(CAV1),ENSBGRG00000002249(DZIP1L),ENSBGRG00000002594(GLI2),ENSBGRG…	0.000379861	0.0391363		ko05323	Rheumatoid arthritis	Human Diseases	Immune disease	11	96	ENSBGRG00000009260,ENSBGRG00000021362,ENSBGRG00000009889(ATP6V0A1),ENSBGRG00000023528(IL11),ENSBGRG00000018711(MMP3),ENSBGRG00000005559(ATP6V1B1),ENSBGRG00000001479(ATP6V1A),ENSBGRG00000022452,ENSBGRG00000018824(CXCL12),ENSBGRG00000010021(CCL20),ENSBGRG00000024848	0.204839	0.711546		MF	GO:0015399	primary active transmembrane transporter activity	7	151	0.00173707	0.0447469	ENSBGRG00000001141(ABCA1),ENSBGRG00000002944(TOMM70),ENSBGRG00000007817(ATP6V1C1),ENSBGRG00000010412(ATP2A2),ENSBGRG00000014876(ATP7B),ENSBGRG00000020672(ABCG2),ENSBGRG00000023586(ABCC1)
BP	GO:0120039	plasma membrane bounded cell projection morphogenesis	52	360	ENSBGRG00000000405(MFSD2A),ENSBGRG00000000520(DPYSL2),ENSBGRG00000000770(ECE1),ENSBGRG00000000909(FSTL4),ENSBGRG00000001111(C9orf72),ENSBGRG00000001761(IFRD1),ENSBGRG00000001923(GAP43),ENSBGRG00000002594(GLI2),ENSBGRG00000002633(PPP3CA),ENSBGRG00000003262(TMEM106B),ENSBGRG00000004157(UGT8),ENSBGRG00000004203(SEMA7A),ENSBGRG00000005119(TTC8),ENSBGRG00000005329(OTX2),ENSBGRG00000005332(STXBP1),ENSB…	0.00039412	0.0400415		ko04917	Prolactin signaling pathway	Organismal Systems	Endocrine system	8	66	ENSBGRG00000010257(STAT3),ENSBGRG00000010846(STAT5A),ENSBGRG00000001789(STAT1),ENSBGRG00000005672(SRC),ENSBGRG00000005168,ENSBGRG00000021837(CGA),ENSBGRG00000025800,ENSBGRG00000007174(FOXO3)	0.207601	0.713629		BP	GO:0043412	macromolecule modification	66	4288	0.00180561	0.109734	ENSBGRG00000001141(ABCA1),ENSBGRG00000002518(DDR2),ENSBGRG00000002824(USP33),ENSBGRG00000003783(SPTB),ENSBGRG00000004461(LRRK1),ENSBGRG00000004626(CBLB),ENSBGRG00000005231(NIBAN2),ENSBGRG00000005379(ATG5),ENSBGRG00000005459(PRDM5),ENSBGRG00000005984(CSNK1D),ENSBGRG00000006051(CDC42BPA),ENSBGRG00000006060(IGF1R),ENSBGRG00000007364(DENND2B),ENSBGRG00000007598(ZRANB1),ENSBGRG00000007622(SMAD1),ENSBG…
BP	GO:0097205	renal filtration	7	17	ENSBGRG00000002633(PPP3CA),ENSBGRG00000003951(AQP1),ENSBGRG00000006217(XPNPEP3),ENSBGRG00000008828(MYO1E),ENSBGRG00000018147(UMOD),ENSBGRG00000024816(ADGRF5),ENSBGRG00000026642(EMP2)	0.00040054	0.0401363		ko04931	Insulin resistance	Human Diseases	Endocrine and metabolic disease	11	97	ENSBGRG00000014262(PPARGC1A),ENSBGRG00000010942(PRKAB2),ENSBGRG00000016630(PRKAB1),ENSBGRG00000025338(OGT),ENSBGRG00000000593(PRKAA2),ENSBGRG00000010257(STAT3),ENSBGRG00000001150(PRKAG1),ENSBGRG00000004485(G6PC3),ENSBGRG00000011880(MLXIPL),ENSBGRG00000004514(GFPT1),ENSBGRG00000009598(MLX)	0.214396	0.729387		BP	GO:0048468	cell development	56	3487	0.0018263	0.109734	ENSBGRG00000000629(GNPTAB),ENSBGRG00000001761(IFRD1),ENSBGRG00000002518(DDR2),ENSBGRG00000002824(USP33),ENSBGRG00000002944(TOMM70),ENSBGRG00000003783(SPTB),ENSBGRG00000003960(ENAH),ENSBGRG00000004149(PTBP3),ENSBGRG00000004274(RABGAP1L),ENSBGRG00000004461(LRRK1),ENSBGRG00000004626(CBLB),ENSBGRG00000005231(NIBAN2),ENSBGRG00000005235(TENT2),ENSBGRG00000005379(ATG5),ENSBGRG00000005984(CSNK1D),ENSBGRG…
BP	GO:0097485	neuron projection guidance	25	136	ENSBGRG00000000520(DPYSL2),ENSBGRG00000000770(ECE1),ENSBGRG00000001923(GAP43),ENSBGRG00000002594(GLI2),ENSBGRG00000005119(TTC8),ENSBGRG00000005329(OTX2),ENSBGRG00000007842(KLF7),ENSBGRG00000010358,ENSBGRG00000010683(NEO1),ENSBGRG00000012559(DVL1),ENSBGRG00000013046(DPYSL4),ENSBGRG00000013372(POU4F3),ENSBGRG00000015789(TBR1),ENSBGRG00000016632(LAMB2),ENSBGRG00000017354(BMPR2),ENSBGRG00000018287(EM…	0.000413585	0.0408835		ko05166	Human T-cell leukemia virus 1 infection	Human Diseases	Infectious disease: viral	22	214	ENSBGRG00000007727(CDKN2C),ENSBGRG00000016285,ENSBGRG00000014113(ATM),ENSBGRG00000001004(VDAC1),ENSBGRG00000010293(ANAPC2),ENSBGRG00000024537(SMAD4),ENSBGRG00000001845(KAT2B),ENSBGRG00000010388(MSX1),ENSBGRG00000023559(PRKACA),ENSBGRG00000001167(PRKACB),ENSBGRG00000004174(CANX),ENSBGRG00000000673(ADCY6),ENSBGRG00000015905,ENSBGRG00000010846(STAT5A),ENSBGRG00000003311(ANAPC13),ENSBGRG00000022452,E…	0.224448	0.755793		BP	GO:0051050	positive regulation of transport	26	1268	0.00186248	0.109734	ENSBGRG00000000266(PROS1),ENSBGRG00000001141(ABCA1),ENSBGRG00000001896(DENND4C),ENSBGRG00000002944(TOMM70),ENSBGRG00000005379(ATG5),ENSBGRG00000008227(UBR5),ENSBGRG00000009838(NUP214),ENSBGRG00000010412(ATP2A2),ENSBGRG00000012411(LRBA),ENSBGRG00000015284(SPTBN1),ENSBGRG00000016018(ABR),ENSBGRG00000016288(MAGI2),ENSBGRG00000016568(ACSL3),ENSBGRG00000016974(NBEA),ENSBGRG00000019951(CATHL6),ENSBGRG0…
BP	GO:0051253	negative regulation of RNA metabolic process	108	881	ENSBGRG00000000061(GABPA),ENSBGRG00000000285(CIART),ENSBGRG00000000764(CDKN1B),ENSBGRG00000000867(IKZF4),ENSBGRG00000001078(WNT10B),ENSBGRG00000001485(NFX1),ENSBGRG00000001845(KAT2B),ENSBGRG00000001895(ZBTB20),ENSBGRG00000001901(FOXP2),ENSBGRG00000002070(GLIS1),ENSBGRG00000002134(CAV1),ENSBGRG00000002337(ETV5),ENSBGRG00000002486(XRCC5),ENSBGRG00000002538(SMAD5),ENSBGRG00000002594(GLI2),ENSBGRG000…	0.000439273	0.0420713		ko00600	Sphingolipid metabolism	Metabolism	Lipid metabolism	6	48	ENSBGRG00000000977(CERS1),ENSBGRG00000009888(DEGS1),ENSBGRG00000004157(UGT8),ENSBGRG00000004770(CERS3),ENSBGRG00000021104(DEGS2),ENSBGRG00000009715(SPTLC3)	0.231393	0.77131		BP	GO:0042886	amide transport	37	2044	0.00188415	0.109734	ENSBGRG00000000629(GNPTAB),ENSBGRG00000001141(ABCA1),ENSBGRG00000001728(ITPR2),ENSBGRG00000001896(DENND4C),ENSBGRG00000002944(TOMM70),ENSBGRG00000003322(WDR33),ENSBGRG00000004274(RABGAP1L),ENSBGRG00000004626(CBLB),ENSBGRG00000005343(ENSBGRG00000005343),ENSBGRG00000005379(ATG5),ENSBGRG00000005984(CSNK1D),ENSBGRG00000006060(IGF1R),ENSBGRG00000007817(ATP6V1C1),ENSBGRG00000008227(UBR5),ENSBGRG0000000…
BP	GO:0120036	plasma membrane bounded cell projection organization	111	910	ENSBGRG00000000197(EPHA3),ENSBGRG00000000405(MFSD2A),ENSBGRG00000000520(DPYSL2),ENSBGRG00000000645(GMNC),ENSBGRG00000000682(CECR2),ENSBGRG00000000770(ECE1),ENSBGRG00000000909(FSTL4),ENSBGRG00000000918(STK36),ENSBGRG00000001070(ATXN10),ENSBGRG00000001111(C9orf72),ENSBGRG00000001761(IFRD1),ENSBGRG00000001923(GAP43),ENSBGRG00000002134(CAV1),ENSBGRG00000002249(DZIP1L),ENSBGRG00000002594(GLI2),ENSBGRG…	0.000441351	0.0420713		ko04625	C-type lectin receptor signaling pathway	Organismal Systems	Immune system	10	89	ENSBGRG00000016090(MAPKAPK2),ENSBGRG00000019776(CLEC7A),ENSBGRG00000019275(PLCG2),ENSBGRG00000018786(PTGS2),ENSBGRG00000016956(IL12B),ENSBGRG00000013085(EGR3),ENSBGRG00000022744(PYCARD),ENSBGRG00000001789(STAT1),ENSBGRG00000002633(PPP3CA),ENSBGRG00000005672(SRC)	0.237555	0.78393		BP	GO:0045807	positive regulation of endocytosis	9	248	0.00192061	0.109734	ENSBGRG00000000266(PROS1),ENSBGRG00000012411(LRBA),ENSBGRG00000016018(ABR),ENSBGRG00000016288(MAGI2),ENSBGRG00000016974(NBEA),ENSBGRG00000021365(PIK3C3),ENSBGRG00000021443(ANO6),ENSBGRG00000024381(EEF2K),ENSBGRG00000024679(PICALM)
BP	GO:0051130	positive regulation of cellular component organization	97	776	ENSBGRG00000000197(EPHA3),ENSBGRG00000000428(ATR),ENSBGRG00000000587(GPSM2),ENSBGRG00000000764(CDKN1B),ENSBGRG00000000977(CERS1),ENSBGRG00000001004(VDAC1),ENSBGRG00000001078(WNT10B),ENSBGRG00000001750(ADGRL2),ENSBGRG00000001845(KAT2B),ENSBGRG00000002134(CAV1),ENSBGRG00000002486(XRCC5),ENSBGRG00000002633(PPP3CA),ENSBGRG00000003534(ACTR3),ENSBGRG00000003668(APOA1),ENSBGRG00000003952(RAD21),ENSBGRG0…	0.000443102	0.0420713		ko04910	Insulin signaling pathway	Organismal Systems	Endocrine system	13	121	ENSBGRG00000014792(ACACA),ENSBGRG00000013023(RAPGEF1),ENSBGRG00000004485(G6PC3),ENSBGRG00000001150(PRKAG1),ENSBGRG00000007471(RHOQ),ENSBGRG00000011917(HK1),ENSBGRG00000000593(PRKAA2),ENSBGRG00000001167(PRKACB),ENSBGRG00000023559(PRKACA),ENSBGRG00000010942(PRKAB2),ENSBGRG00000016630(PRKAB1),ENSBGRG00000005168,ENSBGRG00000014262(PPARGC1A)	0.244713	0.790034		MF	GO:0017160	Ral GTPase binding	3	22	0.0019208	0.0475769	ENSBGRG00000002824(USP33),ENSBGRG00000009140(PRKCH),ENSBGRG00000016288(MAGI2)
BP	GO:0031324	negative regulation of cellular metabolic process	176	1552	ENSBGRG00000000061(GABPA),ENSBGRG00000000285(CIART),ENSBGRG00000000405(MFSD2A),ENSBGRG00000000428(ATR),ENSBGRG00000000593(PRKAA2),ENSBGRG00000000764(CDKN1B),ENSBGRG00000000867(IKZF4),ENSBGRG00000000920(ZRANB3),ENSBGRG00000000962(MCL1),ENSBGRG00000000977(CERS1),ENSBGRG00000001004(VDAC1),ENSBGRG00000001078(WNT10B),ENSBGRG00000001111(C9orf72),ENSBGRG00000001178(SGTA),ENSBGRG00000001485(NFX1),ENSBGRG…	0.000448607	0.0420713		ko00770	Pantothenate and CoA biosynthesis	Metabolism	Metabolism of cofactors and vitamins	3	20	ENSBGRG00000024994(PPCDC),ENSBGRG00000001086,ENSBGRG00000019779(BCAT2)	0.246586	0.790034		BP	GO:0051056	regulation of small GTPase mediated signal transduction	11	349	0.00192308	0.109734	ENSBGRG00000001141(ABCA1),ENSBGRG00000001896(DENND4C),ENSBGRG00000004086(DENND5B),ENSBGRG00000006051(CDC42BPA),ENSBGRG00000011309(ARHGAP18),ENSBGRG00000016018(ABR),ENSBGRG00000017494(DOCK11),ENSBGRG00000018618(DOCK7),ENSBGRG00000022862(DOCK9),ENSBGRG00000022891(RAF1),ENSBGRG00000024953(DENND4A)
BP	GO:0032990	cell part morphogenesis	54	380	ENSBGRG00000000405(MFSD2A),ENSBGRG00000000520(DPYSL2),ENSBGRG00000000770(ECE1),ENSBGRG00000000909(FSTL4),ENSBGRG00000001111(C9orf72),ENSBGRG00000001761(IFRD1),ENSBGRG00000001923(GAP43),ENSBGRG00000002594(GLI2),ENSBGRG00000002633(PPP3CA),ENSBGRG00000003262(TMEM106B),ENSBGRG00000004157(UGT8),ENSBGRG00000004203(SEMA7A),ENSBGRG00000005119(TTC8),ENSBGRG00000005329(OTX2),ENSBGRG00000005332(STXBP1),ENSB…	0.000460646	0.0426535		ko00040	Pentose and glucuronate interconversions	Metabolism	Carbohydrate metabolism	3	20	ENSBGRG00000011055,ENSBGRG00000013005,ENSBGRG00000010367(UGP2)	0.246586	0.790034		BP	GO:0007399	nervous system development	54	3339	0.00195	0.109734	ENSBGRG00000001761(IFRD1),ENSBGRG00000002518(DDR2),ENSBGRG00000002824(USP33),ENSBGRG00000003783(SPTB),ENSBGRG00000003960(ENAH),ENSBGRG00000004575(SERINC5),ENSBGRG00000004626(CBLB),ENSBGRG00000005231(NIBAN2),ENSBGRG00000005235(TENT2),ENSBGRG00000005984(CSNK1D),ENSBGRG00000006060(IGF1R),ENSBGRG00000006248(PIKFYVE),ENSBGRG00000007598(ZRANB1),ENSBGRG00000007622(SMAD1),ENSBGRG00000008613(ENSBGRG000000…
BP	GO:0003002	regionalization	40	259	ENSBGRG00000001167(PRKACB),ENSBGRG00000001195(SP8),ENSBGRG00000002039(HOXA6),ENSBGRG00000002249(DZIP1L),ENSBGRG00000002594(GLI2),ENSBGRG00000003766(HOXC13),ENSBGRG00000003786(MYF6),ENSBGRG00000004989(ACVR2A),ENSBGRG00000006338(PCDH8),ENSBGRG00000006480(SIX3),ENSBGRG00000008234(DMRTA2),ENSBGRG00000008619(SIX1),ENSBGRG00000008954(BPTF),ENSBGRG00000010012(AR),ENSBGRG00000010067(GDF11),ENSBGRG0000001…	0.000472708	0.0432233		ko04728	Dopaminergic synapse	Organismal Systems	Nervous system	12	111	ENSBGRG00000002633(PPP3CA),ENSBGRG00000013578,ENSBGRG00000020983(GRIA4),ENSBGRG00000013226(PPP2R2C),ENSBGRG00000021420(CAMK2A),ENSBGRG00000010476(GRIA3),ENSBGRG00000001167(PRKACB),ENSBGRG00000015939(CALY),ENSBGRG00000023559(PRKACA),ENSBGRG00000009912(PPP2R1B),ENSBGRG00000007869(KCNJ3),ENSBGRG00000019173(SLC18A2)	0.249519	0.791741		BP	GO:0006897	endocytosis	19	815	0.00195026	0.109734	ENSBGRG00000000266(PROS1),ENSBGRG00000001141(ABCA1),ENSBGRG00000004626(CBLB),ENSBGRG00000005379(ATG5),ENSBGRG00000005984(CSNK1D),ENSBGRG00000007429(LRRC40),ENSBGRG00000011372(BMP2K),ENSBGRG00000012411(LRBA),ENSBGRG00000014952(AGAP1),ENSBGRG00000016018(ABR),ENSBGRG00000016288(MAGI2),ENSBGRG00000016974(NBEA),ENSBGRG00000018618(DOCK7),ENSBGRG00000018694(USP9X),ENSBGRG00000021365(PIK3C3),ENSBGRG00000…
BP	GO:0044237	cellular metabolic process	715	7353	ENSBGRG00000000004(VGLL3),ENSBGRG00000000061(GABPA),ENSBGRG00000000074(N6AMT1),ENSBGRG00000000197(EPHA3),ENSBGRG00000000203(DDOST),ENSBGRG00000000213(NFE2L2),ENSBGRG00000000221(F3),ENSBGRG00000000235,ENSBGRG00000000283(HP1BP3),ENSBGRG00000000285(CIART),ENSBGRG00000000351(EEPD1),ENSBGRG00000000405(MFSD2A),ENSBGRG00000000428(ATR),ENSBGRG00000000440(PYM1),ENSBGRG00000000461(NR4A3),ENSBGRG00000000535…	0.000480496	0.0433929		ko04115	p53 signaling pathway	Cellular Processes	Cell growth and death	8	70	ENSBGRG00000005533(COP1),ENSBGRG00000016285,ENSBGRG00000014113(ATM),ENSBGRG00000001310(GTSE1),ENSBGRG00000000428(ATR),ENSBGRG00000009124(RRM2B),ENSBGRG00000025440(SERPINE1),ENSBGRG00000017283(FAS)	0.255884	0.804207		CC	GO:0000151	ubiquitin ligase complex	11	359	0.00199627	0.1733	ENSBGRG00000002321(FBXO42),ENSBGRG00000002824(USP33),ENSBGRG00000007714(RNF144B),ENSBGRG00000009157(DCAF17),ENSBGRG00000012799(FBXW8),ENSBGRG00000012856(UBE2D1),ENSBGRG00000013378(FEM1C),ENSBGRG00000014000(ASB3),ENSBGRG00000019540(CACUL1),ENSBGRG00000022197(FBXL2),ENSBGRG00000026508(FBXL4)
BP	GO:0044260	cellular macromolecule metabolic process	557	5598	ENSBGRG00000000004(VGLL3),ENSBGRG00000000061(GABPA),ENSBGRG00000000074(N6AMT1),ENSBGRG00000000197(EPHA3),ENSBGRG00000000203(DDOST),ENSBGRG00000000213(NFE2L2),ENSBGRG00000000221(F3),ENSBGRG00000000235,ENSBGRG00000000283(HP1BP3),ENSBGRG00000000285(CIART),ENSBGRG00000000351(EEPD1),ENSBGRG00000000428(ATR),ENSBGRG00000000440(PYM1),ENSBGRG00000000461(NR4A3),ENSBGRG00000000535,ENSBGRG00000000542(CRTC1),…	0.00050475	0.0450274		ko04610	Complement and coagulation cascades	Organismal Systems	Immune system	9	81	ENSBGRG00000012007,ENSBGRG00000003430(C1QC),ENSBGRG00000010723,ENSBGRG00000018916(F13A1),ENSBGRG00000026148,ENSBGRG00000009552(PROCR),ENSBGRG00000000266(PROS1),ENSBGRG00000025440(SERPINE1),ENSBGRG00000000221(F3)	0.263919	0.821636		BP	GO:0008582	regulation of synaptic growth at neuromuscular junction	7	158	0.00200854	0.111527	ENSBGRG00000003960(ENAH),ENSBGRG00000006060(IGF1R),ENSBGRG00000008613(ENSBGRG00000008613),ENSBGRG00000015284(SPTBN1),ENSBGRG00000016568(ACSL3),ENSBGRG00000021677(SYNCRIP),ENSBGRG00000024536(BMP5)
BP	GO:0035930	corticosteroid hormone secretion	5	9	ENSBGRG00000008588(REN),ENSBGRG00000015409(CRY1),ENSBGRG00000019832(C1QTNF1),ENSBGRG00000023482(GALR1),ENSBGRG00000025055(SELENOM)	0.00053526	0.0466122		ko05321	Inflammatory bowel disease	Human Diseases	Immune disease	8	71	ENSBGRG00000010257(STAT3),ENSBGRG00000002783(RORC),ENSBGRG00000001789(STAT1),ENSBGRG00000022452,ENSBGRG00000002683(IL13),ENSBGRG00000016956(IL12B),ENSBGRG00000021362,ENSBGRG00000021331	0.268474	0.828003		MF	GO:0004674	protein serine/threonine kinase activity	12	399	0.00210237	0.0501455	ENSBGRG00000004461(LRRK1),ENSBGRG00000005984(CSNK1D),ENSBGRG00000006051(CDC42BPA),ENSBGRG00000008463(TLK1),ENSBGRG00000009140(PRKCH),ENSBGRG00000010459(CDK19),ENSBGRG00000011372(BMP2K),ENSBGRG00000016159(NEK7),ENSBGRG00000022891(RAF1),ENSBGRG00000024381(EEF2K),ENSBGRG00000024593(TGFBR2),ENSBGRG00000025235(DBF4)
BP	GO:0038166	angiotensin-activated signaling pathway	5	9	ENSBGRG00000002134(CAV1),ENSBGRG00000002429(AHCYL1),ENSBGRG00000005672(SRC),ENSBGRG00000020777(ACTN2),ENSBGRG00000021420(CAMK2A)	0.00053526	0.0466122		ko04925	Aldosterone synthesis and secretion	Organismal Systems	Endocrine system	9	82	ENSBGRG00000005861(LDLR),ENSBGRG00000026596(CACNA1H),ENSBGRG00000021420(CAMK2A),ENSBGRG00000007753(CACNA1G),ENSBGRG00000012214(SCARB1),ENSBGRG00000025849(DAGLB),ENSBGRG00000000673(ADCY6),ENSBGRG00000023559(PRKACA),ENSBGRG00000001167(PRKACB)	0.27575	0.828366		BP	GO:0045184	establishment of protein localization	37	2059	0.0021433	0.114025	ENSBGRG00000000629(GNPTAB),ENSBGRG00000001141(ABCA1),ENSBGRG00000001728(ITPR2),ENSBGRG00000001896(DENND4C),ENSBGRG00000002944(TOMM70),ENSBGRG00000003322(WDR33),ENSBGRG00000004274(RABGAP1L),ENSBGRG00000004626(CBLB),ENSBGRG00000005343(ENSBGRG00000005343),ENSBGRG00000005379(ATG5),ENSBGRG00000005984(CSNK1D),ENSBGRG00000006060(IGF1R),ENSBGRG00000007817(ATP6V1C1),ENSBGRG00000008227(UBR5),ENSBGRG0000000…
CC	GO:0016604	nuclear body	74	566	ENSBGRG00000000283(HP1BP3),ENSBGRG00000000428(ATR),ENSBGRG00000000542(CRTC1),ENSBGRG00000000593(PRKAA2),ENSBGRG00000000726(PPIE),ENSBGRG00000000785(DDX39A),ENSBGRG00000000867(IKZF4),ENSBGRG00000001227(SUGP2),ENSBGRG00000001771(DDX46),ENSBGRG00000001895(ZBTB20),ENSBGRG00000001954(ZNF395),ENSBGRG00000002039(HOXA6),ENSBGRG00000002490(CELF3),ENSBGRG00000002594(GLI2),ENSBGRG00000002783(RORC),ENSBGRG00…	0.000547357	0.0311993		ko01522	Endocrine resistance	Human Diseases	Drug resistance: antineoplastic	9	82	ENSBGRG00000000764(CDKN1B),ENSBGRG00000007727(CDKN2C),ENSBGRG00000005672(SRC),ENSBGRG00000005168,ENSBGRG00000020100(RB1),ENSBGRG00000001167(PRKACB),ENSBGRG00000023559(PRKACA),ENSBGRG00000000673(ADCY6),ENSBGRG00000006002(JAG2)	0.27575	0.828366		BP	GO:0043001	Golgi to plasma membrane protein transport	4	49	0.00216203	0.114025	ENSBGRG00000001896(DENND4C),ENSBGRG00000015284(SPTBN1),ENSBGRG00000016568(ACSL3),ENSBGRG00000024953(DENND4A)
BP	GO:0048812	neuron projection morphogenesis	50	348	ENSBGRG00000000405(MFSD2A),ENSBGRG00000000520(DPYSL2),ENSBGRG00000000770(ECE1),ENSBGRG00000000909(FSTL4),ENSBGRG00000001111(C9orf72),ENSBGRG00000001761(IFRD1),ENSBGRG00000001923(GAP43),ENSBGRG00000002594(GLI2),ENSBGRG00000002633(PPP3CA),ENSBGRG00000003262(TMEM106B),ENSBGRG00000004157(UGT8),ENSBGRG00000004203(SEMA7A),ENSBGRG00000005119(TTC8),ENSBGRG00000005329(OTX2),ENSBGRG00000005332(STXBP1),ENSB…	0.000572008	0.0492263		ko04923	Regulation of lipolysis in adipocytes	Organismal Systems	Endocrine system	6	51	ENSBGRG00000018786(PTGS2),ENSBGRG00000016172(PNPLA3),ENSBGRG00000021837(CGA),ENSBGRG00000001167(PRKACB),ENSBGRG00000023559(PRKACA),ENSBGRG00000000673(ADCY6)	0.276122	0.828366		BP	GO:0030030	cell projection organization	38	2135	0.00219068	0.114025	ENSBGRG00000000973(FGD6),ENSBGRG00000001761(IFRD1),ENSBGRG00000002518(DDR2),ENSBGRG00000002824(USP33),ENSBGRG00000003783(SPTB),ENSBGRG00000003960(ENAH),ENSBGRG00000005231(NIBAN2),ENSBGRG00000005379(ATG5),ENSBGRG00000005984(CSNK1D),ENSBGRG00000006060(IGF1R),ENSBGRG00000007622(SMAD1),ENSBGRG00000008613(ENSBGRG00000008613),ENSBGRG00000009278(TMEM67),ENSBGRG00000009644(PPP1R9A),ENSBGRG00000010459(CDK…
BP	GO:0031175	neuron projection development	71	538	ENSBGRG00000000197(EPHA3),ENSBGRG00000000405(MFSD2A),ENSBGRG00000000520(DPYSL2),ENSBGRG00000000682(CECR2),ENSBGRG00000000770(ECE1),ENSBGRG00000000909(FSTL4),ENSBGRG00000001070(ATXN10),ENSBGRG00000001111(C9orf72),ENSBGRG00000001761(IFRD1),ENSBGRG00000001923(GAP43),ENSBGRG00000002594(GLI2),ENSBGRG00000002633(PPP3CA),ENSBGRG00000003262(TMEM106B),ENSBGRG00000004157(UGT8),ENSBGRG00000004203(SEMA7A),EN…	0.000585519	0.0498031		ko01521	EGFR tyrosine kinase inhibitor resistance	Human Diseases	Drug resistance: antineoplastic	8	72	ENSBGRG00000017575(FGFR3),ENSBGRG00000010536(FGF2),ENSBGRG00000010257(STAT3),ENSBGRG00000019275(PLCG2),ENSBGRG00000007174(FOXO3),ENSBGRG00000016285,ENSBGRG00000005672(SRC),ENSBGRG00000005168	0.281237	0.828645		BP	GO:0014888	striated muscle adaptation	4	50	0.00232979	0.114025	ENSBGRG00000008351(MYH7),ENSBGRG00000010412(ATP2A2),ENSBGRG00000022578(CFLAR),ENSBGRG00000023693(MLIP)
MF	GO:0140110	transcription regulator activity	123	1057	ENSBGRG00000000061(GABPA),ENSBGRG00000000213(NFE2L2),ENSBGRG00000000235,ENSBGRG00000000461(NR4A3),ENSBGRG00000000535,ENSBGRG00000001485(NFX1),ENSBGRG00000001789(STAT1),ENSBGRG00000001845(KAT2B),ENSBGRG00000001895(ZBTB20),ENSBGRG00000001901(FOXP2),ENSBGRG00000001954(ZNF395),ENSBGRG00000002039(HOXA6),ENSBGRG00000002070(GLIS1),ENSBGRG00000002072(hoxA10),ENSBGRG00000002337(ETV5),ENSBGRG00000002538(SM…	0.000605458	0.0801957		ko04912	GnRH signaling pathway	Organismal Systems	Endocrine system	8	72	ENSBGRG00000023016(MAPK7),ENSBGRG00000002568(MAP3K2),ENSBGRG00000021837(CGA),ENSBGRG00000005672(SRC),ENSBGRG00000021420(CAMK2A),ENSBGRG00000001167(PRKACB),ENSBGRG00000023559(PRKACA),ENSBGRG00000000673(ADCY6)	0.281237	0.828645		BP	GO:0009306	protein secretion	17	705	0.00238061	0.114025	ENSBGRG00000000629(GNPTAB),ENSBGRG00000001141(ABCA1),ENSBGRG00000001728(ITPR2),ENSBGRG00000001896(DENND4C),ENSBGRG00000005379(ATG5),ENSBGRG00000008227(UBR5),ENSBGRG00000008434(UBE2Q1),ENSBGRG00000015284(SPTBN1),ENSBGRG00000019951(CATHL6),ENSBGRG00000020321(ENSBGRG00000020321),ENSBGRG00000021132(VMP1),ENSBGRG00000021365(PIK3C3),ENSBGRG00000022891(RAF1),ENSBGRG00000024593(TGFBR2),ENSBGRG00000024953…
BP	GO:0033036	macromolecule localization	194	1745	ENSBGRG00000000197(EPHA3),ENSBGRG00000000351(EEPD1),ENSBGRG00000000405(MFSD2A),ENSBGRG00000000428(ATR),ENSBGRG00000000587(GPSM2),ENSBGRG00000000593(PRKAA2),ENSBGRG00000000785(DDX39A),ENSBGRG00000001178(SGTA),ENSBGRG00000001676(ZDHHC23),ENSBGRG00000002134(CAV1),ENSBGRG00000002167(SNX13),ENSBGRG00000002249(DZIP1L),ENSBGRG00000002429(AHCYL1),ENSBGRG00000002633(PPP3CA),ENSBGRG00000003435,ENSBGRG00000…	0.000626277	0.0526576		ko00590	Arachidonic acid metabolism	Metabolism	Lipid metabolism	7	62	ENSBGRG00000006714(CYP2U1),ENSBGRG00000025285,ENSBGRG00000018786(PTGS2),ENSBGRG00000005071,ENSBGRG00000005175,ENSBGRG00000025402(ALOX15),ENSBGRG00000017832(CYP2E1)	0.286557	0.832084		CC	GO:0014731	spectrin-associated cytoskeleton	2	7	0.00240345	0.1733	ENSBGRG00000003783(SPTB),ENSBGRG00000015284(SPTBN1)
BP	GO:0007423	sensory organ development	56	403	ENSBGRG00000000405(MFSD2A),ENSBGRG00000000682(CECR2),ENSBGRG00000000764(CDKN1B),ENSBGRG00000000770(ECE1),ENSBGRG00000001078(WNT10B),ENSBGRG00000002594(GLI2),ENSBGRG00000002918(PFDN5),ENSBGRG00000003766(HOXC13),ENSBGRG00000003951(AQP1),ENSBGRG00000004042(OSR2),ENSBGRG00000004372(NTRK2),ENSBGRG00000004436(BFSP2),ENSBGRG00000004859(USH2A),ENSBGRG00000005119(TTC8),ENSBGRG00000005255(COL5A1),ENSBGRG00…	0.000637221	0.052969		ko04310	Wnt signaling pathway	Environmental Information Processing	Signal transduction	15	147	ENSBGRG00000006342(RSPO1),ENSBGRG00000001167(PRKACB),ENSBGRG00000023559(PRKACA),ENSBGRG00000019557(WNT5B),ENSBGRG00000007688(FZD6),ENSBGRG00000021420(CAMK2A),ENSBGRG00000012559(DVL1),ENSBGRG00000002633(PPP3CA),ENSBGRG00000004379(NOTUM),ENSBGRG00000001078(WNT10B),ENSBGRG00000023662(DAAM2),ENSBGRG00000003307(TBL1XR1),ENSBGRG00000024537(SMAD4),ENSBGRG00000007582(VANGL1),ENSBGRG00000017933(WIF1)	0.287447	0.832084		BP	GO:0035592	establishment of protein localization to extracellular region	17	708	0.00248758	0.114025	ENSBGRG00000000629(GNPTAB),ENSBGRG00000001141(ABCA1),ENSBGRG00000001728(ITPR2),ENSBGRG00000001896(DENND4C),ENSBGRG00000005379(ATG5),ENSBGRG00000008227(UBR5),ENSBGRG00000008434(UBE2Q1),ENSBGRG00000015284(SPTBN1),ENSBGRG00000019951(CATHL6),ENSBGRG00000020321(ENSBGRG00000020321),ENSBGRG00000021132(VMP1),ENSBGRG00000021365(PIK3C3),ENSBGRG00000022891(RAF1),ENSBGRG00000024593(TGFBR2),ENSBGRG00000024953…
MF	GO:0034246	mitochondrial sequence-specific DNA-binding transcription factor activity	3	3	ENSBGRG00000006812(TFB2M),ENSBGRG00000007174(FOXO3),ENSBGRG00000019113(TFAM)	0.000675815	0.0806737		ko04012	ErbB signaling pathway	Environmental Information Processing	Signal transduction	8	73	ENSBGRG00000005672(SRC),ENSBGRG00000005168,ENSBGRG00000000764(CDKN1B),ENSBGRG00000011285(PAK5),ENSBGRG00000010846(STAT5A),ENSBGRG00000012573(NCK2),ENSBGRG00000019275(PLCG2),ENSBGRG00000021420(CAMK2A)	0.294157	0.838625		BP	GO:0044260	cellular macromolecule metabolic process	109	8061	0.00249297	0.114025	ENSBGRG00000000262(BOLL),ENSBGRG00000000266(PROS1),ENSBGRG00000000629(GNPTAB),ENSBGRG00000001141(ABCA1),ENSBGRG00000001761(IFRD1),ENSBGRG00000002023(ZNF596),ENSBGRG00000002158(HMBOX1),ENSBGRG00000002321(FBXO42),ENSBGRG00000002518(DDR2),ENSBGRG00000002693(APBB2),ENSBGRG00000002824(USP33),ENSBGRG00000003322(WDR33),ENSBGRG00000003783(SPTB),ENSBGRG00000004129(PMS1),ENSBGRG00000004149(PTBP3),ENSBGRG00…
BP	GO:0010557	positive regulation of macromolecule biosynthetic process	143	1235	ENSBGRG00000000061(GABPA),ENSBGRG00000000213(NFE2L2),ENSBGRG00000000440(PYM1),ENSBGRG00000000461(NR4A3),ENSBGRG00000000542(CRTC1),ENSBGRG00000000867(IKZF4),ENSBGRG00000001078(WNT10B),ENSBGRG00000001789(STAT1),ENSBGRG00000001845(KAT2B),ENSBGRG00000001892(ING5),ENSBGRG00000001954(ZNF395),ENSBGRG00000002070(GLIS1),ENSBGRG00000002309(LUM),ENSBGRG00000002337(ETV5),ENSBGRG00000002486(XRCC5),ENSBGRG0000…	0.000682214	0.0560718		ko03430	Mismatch repair	Genetic Information Processing	Replication and repair	3	22	ENSBGRG00000024546,ENSBGRG00000010710(RFC5),ENSBGRG00000003610(RFC1)	0.295076	0.838625		BP	GO:0006810	transport	76	5171	0.00250817	0.114025	ENSBGRG00000000266(PROS1),ENSBGRG00000000629(GNPTAB),ENSBGRG00000001141(ABCA1),ENSBGRG00000001484(SEC24B),ENSBGRG00000001728(ITPR2),ENSBGRG00000001896(DENND4C),ENSBGRG00000002944(TOMM70),ENSBGRG00000003322(WDR33),ENSBGRG00000003783(SPTB),ENSBGRG00000003960(ENAH),ENSBGRG00000004086(DENND5B),ENSBGRG00000004274(RABGAP1L),ENSBGRG00000004575(SERINC5),ENSBGRG00000004626(CBLB),ENSBGRG00000005231(NIBAN2)…
BP	GO:0016070	RNA metabolic process	321	3068	ENSBGRG00000000004(VGLL3),ENSBGRG00000000061(GABPA),ENSBGRG00000000213(NFE2L2),ENSBGRG00000000235,ENSBGRG00000000283(HP1BP3),ENSBGRG00000000285(CIART),ENSBGRG00000000440(PYM1),ENSBGRG00000000461(NR4A3),ENSBGRG00000000535,ENSBGRG00000000542(CRTC1),ENSBGRG00000000726(PPIE),ENSBGRG00000000764(CDKN1B),ENSBGRG00000000785(DDX39A),ENSBGRG00000000867(IKZF4),ENSBGRG00000000918(STK36),ENSBGRG00000001078(WN…	0.000702326	0.056677		ko04550	Signaling pathways regulating pluripotency of stem cells	Cellular Processes	Cellular community - eukaryotes	13	127	ENSBGRG00000024537(SMAD4),ENSBGRG00000017354(BMPR2),ENSBGRG00000001078(WNT10B),ENSBGRG00000017575(FGFR3),ENSBGRG00000012559(DVL1),ENSBGRG00000010536(FGF2),ENSBGRG00000004989(ACVR2A),ENSBGRG00000010257(STAT3),ENSBGRG00000019557(WNT5B),ENSBGRG00000007688(FZD6),ENSBGRG00000002538(SMAD5),ENSBGRG00000017359(ONECUT1),ENSBGRG00000018094(ZIC3)	0.302175	0.838625		BP	GO:0003010	voluntary skeletal muscle contraction	2	7	0.00251603	0.114025	ENSBGRG00000007922(MYH6),ENSBGRG00000008351(MYH7)
BP	GO:0007411	axon guidance	24	133	ENSBGRG00000000520(DPYSL2),ENSBGRG00000000770(ECE1),ENSBGRG00000001923(GAP43),ENSBGRG00000002594(GLI2),ENSBGRG00000005119(TTC8),ENSBGRG00000005329(OTX2),ENSBGRG00000007842(KLF7),ENSBGRG00000010358,ENSBGRG00000010683(NEO1),ENSBGRG00000012559(DVL1),ENSBGRG00000013372(POU4F3),ENSBGRG00000015789(TBR1),ENSBGRG00000016632(LAMB2),ENSBGRG00000017354(BMPR2),ENSBGRG00000018287(EMB),ENSBGRG00000018948,ENSBG…	0.000705073	0.056677		ko00524	Neomycin, kanamycin and gentamicin biosynthesis	Metabolism	Biosynthesis of other secondary metabolites	1	4	ENSBGRG00000011917(HK1)	0.303433	0.838625		BP	GO:0007182	common-partner SMAD protein phosphorylation	2	7	0.00251603	0.114025	ENSBGRG00000015284(SPTBN1),ENSBGRG00000024593(TGFBR2)
CC	GO:0005954	calcium- and calmodulin-dependent protein kinase complex	3	3	ENSBGRG00000012404(CAMK2B),ENSBGRG00000021420(CAMK2A),ENSBGRG00000024170(CAMK1G)	0.00071703	0.0383163		ko05320	Autoimmune thyroid disease	Human Diseases	Immune disease	6	53	ENSBGRG00000021837(CGA),ENSBGRG00000022452,ENSBGRG00000017283(FAS),ENSBGRG00000009260,ENSBGRG00000018043(TPO),ENSBGRG00000007038(FASLG)	0.306986	0.838625		BP	GO:0014721	twitch skeletal muscle contraction	2	7	0.00251603	0.114025	ENSBGRG00000007922(MYH6),ENSBGRG00000008351(MYH7)
BP	GO:0070887	cellular response to chemical stimulus	194	1750	ENSBGRG00000000061(GABPA),ENSBGRG00000000074(N6AMT1),ENSBGRG00000000131(IFNAR2),ENSBGRG00000000197(EPHA3),ENSBGRG00000000213(NFE2L2),ENSBGRG00000000283(HP1BP3),ENSBGRG00000000593(PRKAA2),ENSBGRG00000000673(ADCY6),ENSBGRG00000000764(CDKN1B),ENSBGRG00000000798(GABRG2),ENSBGRG00000000962(MCL1),ENSBGRG00000000977(CERS1),ENSBGRG00000001078(WNT10B),ENSBGRG00000001424(LONP1),ENSBGRG00000001451(CHMP5),EN…	0.000724185	0.0573026		ko04261	Adrenergic signaling in cardiomyocytes	Organismal Systems	Circulatory system	13	128	ENSBGRG00000000673(ADCY6),ENSBGRG00000019027(ATP2A3),ENSBGRG00000023559(PRKACA),ENSBGRG00000009912(PPP2R1B),ENSBGRG00000001167(PRKACB),ENSBGRG00000003979,ENSBGRG00000021687(CACNA2D3),ENSBGRG00000021420(CAMK2A),ENSBGRG00000021871(CACNG6),ENSBGRG00000021717(CACNG7),ENSBGRG00000026668(PIK3R6),ENSBGRG00000007268(PIK3CG),ENSBGRG00000013226(PPP2R2C)	0.312112	0.838625		BP	GO:0014883	transition between fast and slow fiber	2	7	0.00251603	0.114025	ENSBGRG00000008351(MYH7),ENSBGRG00000010412(ATP2A2)
BP	GO:0008219	cell death	142	1227	ENSBGRG00000000213(NFE2L2),ENSBGRG00000000221(F3),ENSBGRG00000000593(PRKAA2),ENSBGRG00000000682(CECR2),ENSBGRG00000000764(CDKN1B),ENSBGRG00000000766(TRIM35),ENSBGRG00000000962(MCL1),ENSBGRG00000001004(VDAC1),ENSBGRG00000001078(WNT10B),ENSBGRG00000001329(STK17B),ENSBGRG00000001347(LMBR1L),ENSBGRG00000001451(CHMP5),ENSBGRG00000001666(CASP6),ENSBGRG00000001756(NUGGC),ENSBGRG00000001892(ING5),ENSBGRG…	0.000728522	0.0573026		ko04924	Renin secretion	Organismal Systems	Endocrine system	7	64	ENSBGRG00000008588(REN),ENSBGRG00000003951(AQP1),ENSBGRG00000024291(PTGER4),ENSBGRG00000002633(PPP3CA),ENSBGRG00000001167(PRKACB),ENSBGRG00000023559(PRKACA),ENSBGRG00000000673(ADCY6)	0.314832	0.838625		BP	GO:0018026	peptidyl-lysine monomethylation	2	7	0.00251603	0.114025	ENSBGRG00000011253(EHMT1),ENSBGRG00000019016(SETD3)
BP	GO:0070727	cellular macromolecule localization	130	1109	ENSBGRG00000000197(EPHA3),ENSBGRG00000000428(ATR),ENSBGRG00000000587(GPSM2),ENSBGRG00000000593(PRKAA2),ENSBGRG00000000785(DDX39A),ENSBGRG00000001178(SGTA),ENSBGRG00000001676(ZDHHC23),ENSBGRG00000002167(SNX13),ENSBGRG00000002249(DZIP1L),ENSBGRG00000002429(AHCYL1),ENSBGRG00000002633(PPP3CA),ENSBGRG00000003435,ENSBGRG00000003553(AP1M2),ENSBGRG00000003952(RAD21),ENSBGRG00000004157(UGT8),ENSBGRG000000…	0.000746034	0.0580557		ko04722	Neurotrophin signaling pathway	Organismal Systems	Nervous system	11	107	ENSBGRG00000005168,ENSBGRG00000023016(MAPK7),ENSBGRG00000007174(FOXO3),ENSBGRG00000013023(RAPGEF1),ENSBGRG00000019275(PLCG2),ENSBGRG00000007038(FASLG),ENSBGRG00000004372(NTRK2),ENSBGRG00000016090(MAPKAPK2),ENSBGRG00000012192(NTRK3),ENSBGRG00000021420(CAMK2A),ENSBGRG00000023500(NGFR)	0.31849	0.838625		BP	GO:0046618	drug export	2	7	0.00251603	0.114025	ENSBGRG00000020672(ABCG2),ENSBGRG00000023586(ABCC1)
MF	GO:0032051	clathrin light chain binding	4	6	ENSBGRG00000009451(HIP1),ENSBGRG00000012654(NSG2),ENSBGRG00000015939(CALY),ENSBGRG00000021305(CLTC)	0.000768366	0.0806737		ko04114	Oocyte meiosis	Cellular Processes	Cell growth and death	11	107	ENSBGRG00000003311(ANAPC13),ENSBGRG00000000673(ADCY6),ENSBGRG00000009912(PPP2R1B),ENSBGRG00000023559(PRKACA),ENSBGRG00000001167(PRKACB),ENSBGRG00000019376(YWHAH),ENSBGRG00000011397(AURKA),ENSBGRG00000002633(PPP3CA),ENSBGRG00000021420(CAMK2A),ENSBGRG00000010293(ANAPC2),ENSBGRG00000010012(AR)	0.31849	0.838625		BP	GO:0051136	regulation of NK T cell differentiation	2	7	0.00251603	0.114025	ENSBGRG00000021550(IKZF1),ENSBGRG00000024593(TGFBR2)
MF	GO:0070006	metalloaminopeptidase activity	7	19	ENSBGRG00000000711(METAP2),ENSBGRG00000006217(XPNPEP3),ENSBGRG00000007748(XPNPEP2),ENSBGRG00000010401(METAP1D),ENSBGRG00000012532(MMP16),ENSBGRG00000020079(LAP3),ENSBGRG00000020501	0.000775176	0.0806737		ko03013	Nucleocytoplasmic transport	Genetic Information Processing	Translation	11	107	ENSBGRG00000016650(XPO6),ENSBGRG00000019513(NCBP2),ENSBGRG00000022186(NXT2),ENSBGRG00000018777(THOC1),ENSBGRG00000016320(NUP188),ENSBGRG00000010086(KPNA2),ENSBGRG00000006557(XPO7),ENSBGRG00000010238,ENSBGRG00000011942(KPNA4),ENSBGRG00000026618(THOC7),ENSBGRG00000000440(PYM1)	0.31849	0.838625		BP	GO:0061864	basement membrane constituent secretion	2	7	0.00251603	0.114025	ENSBGRG00000001896(DENND4C),ENSBGRG00000024953(DENND4A)
BP	GO:0006468	protein phosphorylation	150	1310	ENSBGRG00000000197(EPHA3),ENSBGRG00000000428(ATR),ENSBGRG00000000593(PRKAA2),ENSBGRG00000000764(CDKN1B),ENSBGRG00000000918(STK36),ENSBGRG00000001111(C9orf72),ENSBGRG00000001150(PRKAG1),ENSBGRG00000001167(PRKACB),ENSBGRG00000001329(STK17B),ENSBGRG00000001473(GUCY2C),ENSBGRG00000001845(KAT2B),ENSBGRG00000001978(TGFBR3),ENSBGRG00000002134(CAV1),ENSBGRG00000002486(XRCC5),ENSBGRG00000002538(SMAD5),ENS…	0.000814829	0.0627418		ko04750	Inflammatory mediator regulation of TRP channels	Organismal Systems	Sensory system	9	86	ENSBGRG00000023559(PRKACA),ENSBGRG00000001167(PRKACB),ENSBGRG00000000673(ADCY6),ENSBGRG00000021420(CAMK2A),ENSBGRG00000005672(SRC),ENSBGRG00000019964(ASIC2),ENSBGRG00000019275(PLCG2),ENSBGRG00000024291(PTGER4),ENSBGRG00000025285	0.324427	0.838625		BP	GO:0051345	positive regulation of hydrolase activity	18	772	0.00255881	0.114025	ENSBGRG00000000599(ENSBGRG00000000599),ENSBGRG00000001896(DENND4C),ENSBGRG00000004274(RABGAP1L),ENSBGRG00000010412(ATP2A2),ENSBGRG00000011309(ARHGAP18),ENSBGRG00000013023(RAPGEF1),ENSBGRG00000014952(AGAP1),ENSBGRG00000015822(RABGAP1),ENSBGRG00000016018(ABR),ENSBGRG00000016288(MAGI2),ENSBGRG00000017494(DOCK11),ENSBGRG00000018618(DOCK7),ENSBGRG00000021365(PIK3C3),ENSBGRG00000022578(CFLAR),ENSBGRG00…
BP	GO:0042754	negative regulation of circadian rhythm	4	6	ENSBGRG00000010031(PIWIL2),ENSBGRG00000011724(CIPC),ENSBGRG00000015409(CRY1),ENSBGRG00000023716(SIN3A)	0.000835853	0.0627973		ko00140	Steroid hormone biosynthesis	Metabolism	Lipid metabolism	5	44	ENSBGRG00000025285,ENSBGRG00000011055,ENSBGRG00000017832(CYP2E1),ENSBGRG00000009686(SRD5A1),ENSBGRG00000017387(STS)	0.330501	0.838625		BP	GO:0003299	muscle hypertrophy in response to stress	3	25	0.00263725	0.114025	ENSBGRG00000008351(MYH7),ENSBGRG00000010412(ATP2A2),ENSBGRG00000023693(MLIP)
BP	GO:0097021	lymphocyte migration into lymphoid organs	4	6	ENSBGRG00000008735(FUT7),ENSBGRG00000013247(NEDD9),ENSBGRG00000015363(CRTAM),ENSBGRG00000017585(WNK1)	0.000835853	0.0627973		ko00514	Other types of O-glycan biosynthesis	Metabolism	Glycan biosynthesis and metabolism	5	44	ENSBGRG00000025338(OGT),ENSBGRG00000008659(B3GLCT),ENSBGRG00000021905(GXYLT2),ENSBGRG00000007271(GALNT16),ENSBGRG00000023763(LFNG)	0.330501	0.838625		BP	GO:0014898	cardiac muscle hypertrophy in response to stress	3	25	0.00263725	0.114025	ENSBGRG00000008351(MYH7),ENSBGRG00000010412(ATP2A2),ENSBGRG00000023693(MLIP)
BP	GO:1901701	cellular response to oxygen-containing compound	77	601	ENSBGRG00000000061(GABPA),ENSBGRG00000000197(EPHA3),ENSBGRG00000000213(NFE2L2),ENSBGRG00000000593(PRKAA2),ENSBGRG00000000673(ADCY6),ENSBGRG00000000977(CERS1),ENSBGRG00000001078(WNT10B),ENSBGRG00000001451(CHMP5),ENSBGRG00000001529(GRAMD1C),ENSBGRG00000001756(NUGGC),ENSBGRG00000001845(KAT2B),ENSBGRG00000001895(ZBTB20),ENSBGRG00000002134(CAV1),ENSBGRG00000002228(IGFBP5),ENSBGRG00000002429(AHCYL1),EN…	0.000841303	0.0627973		ko05417	Lipid and atherosclerosis	Human Diseases	Cardiovascular disease	18	185	ENSBGRG00000017283(FAS),ENSBGRG00000001666(CASP6),ENSBGRG00000010257(STAT3),ENSBGRG00000007038(FASLG),ENSBGRG00000022744(PYCARD),ENSBGRG00000002633(PPP3CA),ENSBGRG00000003668(APOA1),ENSBGRG00000021420(CAMK2A),ENSBGRG00000005672(SRC),ENSBGRG00000018711(MMP3),ENSBGRG00000000213(NFE2L2),ENSBGRG00000016285,ENSBGRG00000006318,ENSBGRG00000004554(VAV2),ENSBGRG00000015112(MIB1),ENSBGRG00000016956(IL12B),…	0.333601	0.838625		BP	GO:0035459	vesicle cargo loading	3	25	0.00263725	0.114025	ENSBGRG00000001484(SEC24B),ENSBGRG00000005343(ENSBGRG00000005343),ENSBGRG00000024679(PICALM)
BP	GO:0034613	cellular protein localization	129	1104	ENSBGRG00000000197(EPHA3),ENSBGRG00000000428(ATR),ENSBGRG00000000587(GPSM2),ENSBGRG00000000593(PRKAA2),ENSBGRG00000000785(DDX39A),ENSBGRG00000001178(SGTA),ENSBGRG00000001676(ZDHHC23),ENSBGRG00000002167(SNX13),ENSBGRG00000002249(DZIP1L),ENSBGRG00000002429(AHCYL1),ENSBGRG00000002633(PPP3CA),ENSBGRG00000003435,ENSBGRG00000003553(AP1M2),ENSBGRG00000003952(RAD21),ENSBGRG00000004157(UGT8),ENSBGRG000000…	0.000886503	0.0655028		ko05310	Asthma	Human Diseases	Immune disease	4	34	ENSBGRG00000002374(IL9),ENSBGRG00000022452,ENSBGRG00000002683(IL13),ENSBGRG00000009260	0.338025	0.838625		BP	GO:0051963	regulation of synapse assembly	9	260	0.0026416	0.114025	ENSBGRG00000003960(ENAH),ENSBGRG00000006060(IGF1R),ENSBGRG00000008613(ENSBGRG00000008613),ENSBGRG00000009644(PPP1R9A),ENSBGRG00000015284(SPTBN1),ENSBGRG00000016568(ACSL3),ENSBGRG00000021677(SYNCRIP),ENSBGRG00000024381(EEF2K),ENSBGRG00000024536(BMP5)
MF	GO:0003700	DNA-binding transcription factor activity	90	741	ENSBGRG00000000061(GABPA),ENSBGRG00000000213(NFE2L2),ENSBGRG00000000235,ENSBGRG00000000461(NR4A3),ENSBGRG00000000535,ENSBGRG00000001485(NFX1),ENSBGRG00000001789(STAT1),ENSBGRG00000001895(ZBTB20),ENSBGRG00000001901(FOXP2),ENSBGRG00000001954(ZNF395),ENSBGRG00000002039(HOXA6),ENSBGRG00000002070(GLIS1),ENSBGRG00000002072(hoxA10),ENSBGRG00000002337(ETV5),ENSBGRG00000002538(SMAD5),ENSBGRG00000002594(GL…	0.000895112	0.0869452		ko04929	GnRH secretion	Organismal Systems	Endocrine system	6	55	ENSBGRG00000005550(HCN2),ENSBGRG00000026596(CACNA1H),ENSBGRG00000021837(CGA),ENSBGRG00000007753(CACNA1G),ENSBGRG00000020407(SPP1),ENSBGRG00000007869(KCNJ3)	0.338407	0.838625		BP	GO:0071692	protein localization to extracellular region	17	713	0.0026748	0.114025	ENSBGRG00000000629(GNPTAB),ENSBGRG00000001141(ABCA1),ENSBGRG00000001728(ITPR2),ENSBGRG00000001896(DENND4C),ENSBGRG00000005379(ATG5),ENSBGRG00000008227(UBR5),ENSBGRG00000008434(UBE2Q1),ENSBGRG00000015284(SPTBN1),ENSBGRG00000019951(CATHL6),ENSBGRG00000020321(ENSBGRG00000020321),ENSBGRG00000021132(VMP1),ENSBGRG00000021365(PIK3C3),ENSBGRG00000022891(RAF1),ENSBGRG00000024593(TGFBR2),ENSBGRG00000024953…
BP	GO:0010558	negative regulation of macromolecule biosynthetic process	111	929	ENSBGRG00000000061(GABPA),ENSBGRG00000000285(CIART),ENSBGRG00000000428(ATR),ENSBGRG00000000764(CDKN1B),ENSBGRG00000000867(IKZF4),ENSBGRG00000000920(ZRANB3),ENSBGRG00000000977(CERS1),ENSBGRG00000001078(WNT10B),ENSBGRG00000001485(NFX1),ENSBGRG00000001895(ZBTB20),ENSBGRG00000001901(FOXP2),ENSBGRG00000002070(GLIS1),ENSBGRG00000002134(CAV1),ENSBGRG00000002228(IGFBP5),ENSBGRG00000002337(ETV5),ENSBGRG00…	0.000937357	0.0685676		ko04330	Notch signaling pathway	Environmental Information Processing	Signal transduction	6	55	ENSBGRG00000008036(DTX2),ENSBGRG00000023763(LFNG),ENSBGRG00000006002(JAG2),ENSBGRG00000012559(DVL1),ENSBGRG00000001845(KAT2B),ENSBGRG00000011453	0.338407	0.838625		BP	GO:0050790	regulation of catalytic activity	41	2386	0.00274015	0.114025	ENSBGRG00000000266(PROS1),ENSBGRG00000000599(ENSBGRG00000000599),ENSBGRG00000000973(FGD6),ENSBGRG00000001896(DENND4C),ENSBGRG00000002158(HMBOX1),ENSBGRG00000002518(DDR2),ENSBGRG00000004274(RABGAP1L),ENSBGRG00000004575(SERINC5),ENSBGRG00000004626(CBLB),ENSBGRG00000005343(ENSBGRG00000005343),ENSBGRG00000006060(IGF1R),ENSBGRG00000008391(PRRC1),ENSBGRG00000008463(TLK1),ENSBGRG00000009644(PPP1R9A),ENS…
BP	GO:0043583	ear development	27	160	ENSBGRG00000000682(CECR2),ENSBGRG00000000764(CDKN1B),ENSBGRG00000000770(ECE1),ENSBGRG00000002594(GLI2),ENSBGRG00000004042(OSR2),ENSBGRG00000004859(USH2A),ENSBGRG00000005119(TTC8),ENSBGRG00000005559(ATP6V1B1),ENSBGRG00000006002(JAG2),ENSBGRG00000007688(FZD6),ENSBGRG00000008619(SIX1),ENSBGRG00000010308(ADAM10),ENSBGRG00000010388(MSX1),ENSBGRG00000010536(FGF2),ENSBGRG00000010766(INSIG1),ENSBGRG00000…	0.000991932	0.0715218		ko04020	Calcium signaling pathway	Environmental Information Processing	Signal transduction	21	219	ENSBGRG00000009260,ENSBGRG00000010905(VEGFD),ENSBGRG00000026596(CACNA1H),ENSBGRG00000013464(PLCD1),ENSBGRG00000001004(VDAC1),ENSBGRG00000013093(FGF7),ENSBGRG00000013000(NOS2),ENSBGRG00000017575(FGFR3),ENSBGRG00000021420(CAMK2A),ENSBGRG00000012192(NTRK3),ENSBGRG00000006109(FLT4),ENSBGRG00000002633(PPP3CA),ENSBGRG00000011775(NOS1),ENSBGRG00000007753(CACNA1G),ENSBGRG00000010536(FGF2),ENSBGRG00000019…	0.340384	0.838625		BP	GO:1904396	regulation of neuromuscular junction development	7	167	0.00274327	0.114025	ENSBGRG00000003960(ENAH),ENSBGRG00000006060(IGF1R),ENSBGRG00000008613(ENSBGRG00000008613),ENSBGRG00000015284(SPTBN1),ENSBGRG00000016568(ACSL3),ENSBGRG00000021677(SYNCRIP),ENSBGRG00000024536(BMP5)
BP	GO:2000113	negative regulation of cellular macromolecule biosynthetic process	110	921	ENSBGRG00000000061(GABPA),ENSBGRG00000000285(CIART),ENSBGRG00000000428(ATR),ENSBGRG00000000764(CDKN1B),ENSBGRG00000000867(IKZF4),ENSBGRG00000000920(ZRANB3),ENSBGRG00000000977(CERS1),ENSBGRG00000001078(WNT10B),ENSBGRG00000001485(NFX1),ENSBGRG00000001895(ZBTB20),ENSBGRG00000001901(FOXP2),ENSBGRG00000002070(GLIS1),ENSBGRG00000002134(CAV1),ENSBGRG00000002228(IGFBP5),ENSBGRG00000002337(ETV5),ENSBGRG00…	0.00100187	0.0715218		ko05412	Arrhythmogenic right ventricular cardiomyopathy	Human Diseases	Cardiovascular disease	7	66	ENSBGRG00000019027(ATP2A3),ENSBGRG00000021687(CACNA2D3),ENSBGRG00000010970(ITGA6),ENSBGRG00000004717(ITGA5),ENSBGRG00000021717(CACNG7),ENSBGRG00000021871(CACNG6),ENSBGRG00000020777(ACTN2)	0.34358	0.838625		BP	GO:0015914	phospholipid transport	5	86	0.00277018	0.114025	ENSBGRG00000001141(ABCA1),ENSBGRG00000011855(ATP8B1),ENSBGRG00000012550(ATP8B4),ENSBGRG00000021443(ANO6),ENSBGRG00000023586(ABCC1)
BP	GO:0016043	cellular component organization	398	3905	ENSBGRG00000000074(N6AMT1),ENSBGRG00000000197(EPHA3),ENSBGRG00000000283(HP1BP3),ENSBGRG00000000405(MFSD2A),ENSBGRG00000000428(ATR),ENSBGRG00000000440(PYM1),ENSBGRG00000000520(DPYSL2),ENSBGRG00000000542(CRTC1),ENSBGRG00000000587(GPSM2),ENSBGRG00000000593(PRKAA2),ENSBGRG00000000645(GMNC),ENSBGRG00000000682(CECR2),ENSBGRG00000000764(CDKN1B),ENSBGRG00000000770(ECE1),ENSBGRG00000000798(GABRG2),ENSBGRG…	0.00100707	0.0715218		ko00730	Thiamine metabolism	Metabolism	Metabolism of cofactors and vitamins	2	14	ENSBGRG00000003065(AK5),ENSBGRG00000007407(AK1)	0.344249	0.838625		BP	GO:0044257	cellular protein catabolic process	18	778	0.00277951	0.114025	ENSBGRG00000002321(FBXO42),ENSBGRG00000002824(USP33),ENSBGRG00000004626(CBLB),ENSBGRG00000005984(CSNK1D),ENSBGRG00000007598(ZRANB1),ENSBGRG00000007714(RNF144B),ENSBGRG00000008227(UBR5),ENSBGRG00000009278(TMEM67),ENSBGRG00000012799(FBXW8),ENSBGRG00000012856(UBE2D1),ENSBGRG00000013378(FEM1C),ENSBGRG00000018694(USP9X),ENSBGRG00000022197(FBXL2),ENSBGRG00000023442(ATE1),ENSBGRG00000024679(PICALM),ENSB…
BP	GO:0043170	macromolecule metabolic process	657	6744	ENSBGRG00000000004(VGLL3),ENSBGRG00000000061(GABPA),ENSBGRG00000000074(N6AMT1),ENSBGRG00000000197(EPHA3),ENSBGRG00000000203(DDOST),ENSBGRG00000000213(NFE2L2),ENSBGRG00000000221(F3),ENSBGRG00000000235,ENSBGRG00000000283(HP1BP3),ENSBGRG00000000285(CIART),ENSBGRG00000000351(EEPD1),ENSBGRG00000000428(ATR),ENSBGRG00000000440(PYM1),ENSBGRG00000000461(NR4A3),ENSBGRG00000000535,ENSBGRG00000000542(CRTC1),…	0.00103468	0.0727755		ko04146	Peroxisome	Cellular Processes	Transport and catabolism	8	77	ENSBGRG00000012564(PEX14),ENSBGRG00000023525,ENSBGRG00000015477(PEX11G),ENSBGRG00000000237(AGPS),ENSBGRG00000020016(NUDT12),ENSBGRG00000018041(MLYCD),ENSBGRG00000013000(NOS2),ENSBGRG00000012770	0.347047	0.838625		BP	GO:0051649	establishment of localization in cell	49	3000	0.00278953	0.114025	ENSBGRG00000000266(PROS1),ENSBGRG00000000629(GNPTAB),ENSBGRG00000001141(ABCA1),ENSBGRG00000001484(SEC24B),ENSBGRG00000001728(ITPR2),ENSBGRG00000002944(TOMM70),ENSBGRG00000003322(WDR33),ENSBGRG00000003783(SPTB),ENSBGRG00000003960(ENAH),ENSBGRG00000004274(RABGAP1L),ENSBGRG00000004626(CBLB),ENSBGRG00000005235(TENT2),ENSBGRG00000005343(ENSBGRG00000005343),ENSBGRG00000005379(ATG5),ENSBGRG00000005984(C…
BP	GO:0048667	cell morphogenesis involved in neuron differentiation	46	322	ENSBGRG00000000405(MFSD2A),ENSBGRG00000000520(DPYSL2),ENSBGRG00000000770(ECE1),ENSBGRG00000000909(FSTL4),ENSBGRG00000001111(C9orf72),ENSBGRG00000001761(IFRD1),ENSBGRG00000001923(GAP43),ENSBGRG00000002594(GLI2),ENSBGRG00000002633(PPP3CA),ENSBGRG00000003262(TMEM106B),ENSBGRG00000004203(SEMA7A),ENSBGRG00000005119(TTC8),ENSBGRG00000005329(OTX2),ENSBGRG00000005332(STXBP1),ENSBGRG00000005404(MAPK8IP2),…	0.00105325	0.0733765		ko05330	Allograft rejection	Human Diseases	Immune disease	5	45	ENSBGRG00000022452,ENSBGRG00000017283(FAS),ENSBGRG00000007038(FASLG),ENSBGRG00000009260,ENSBGRG00000016956(IL12B)	0.348156	0.838625		BP	GO:0032879	regulation of localization	51	3157	0.0028101	0.114025	ENSBGRG00000000266(PROS1),ENSBGRG00000001141(ABCA1),ENSBGRG00000001728(ITPR2),ENSBGRG00000001896(DENND4C),ENSBGRG00000002518(DDR2),ENSBGRG00000002944(TOMM70),ENSBGRG00000003960(ENAH),ENSBGRG00000004274(RABGAP1L),ENSBGRG00000005379(ATG5),ENSBGRG00000005984(CSNK1D),ENSBGRG00000006060(IGF1R),ENSBGRG00000006376(MEMO1),ENSBGRG00000007061(RRAS2),ENSBGRG00000008227(UBR5),ENSBGRG00000009072(SLC30A7),ENSB…
BP	GO:0032879	regulation of localization	182	1642	ENSBGRG00000000197(EPHA3),ENSBGRG00000000213(NFE2L2),ENSBGRG00000000351(EEPD1),ENSBGRG00000000461(NR4A3),ENSBGRG00000000587(GPSM2),ENSBGRG00000000593(PRKAA2),ENSBGRG00000001004(VDAC1),ENSBGRG00000001516(CCDC25),ENSBGRG00000001845(KAT2B),ENSBGRG00000001905(TBCCD1),ENSBGRG00000002134(CAV1),ENSBGRG00000002228(IGFBP5),ENSBGRG00000002249(DZIP1L),ENSBGRG00000002429(AHCYL1),ENSBGRG00000002536(EPB41L4B),…	0.00108661	0.074458		ko00260	Glycine, serine and threonine metabolism	Metabolism	Amino acid metabolism	5	45	ENSBGRG00000015370(PSAT1),ENSBGRG00000019341(GATM),ENSBGRG00000005578(BHMT),ENSBGRG00000005663(DMGDH),ENSBGRG00000013578	0.348156	0.838625		MF	GO:0016772	transferase activity, transferring phosphorus-containing groups	21	954	0.00281852	0.064826	ENSBGRG00000000629(GNPTAB),ENSBGRG00000002518(DDR2),ENSBGRG00000004461(LRRK1),ENSBGRG00000005235(TENT2),ENSBGRG00000005383(DGKH),ENSBGRG00000005984(CSNK1D),ENSBGRG00000006051(CDC42BPA),ENSBGRG00000006060(IGF1R),ENSBGRG00000006248(PIKFYVE),ENSBGRG00000008463(TLK1),ENSBGRG00000009140(PRKCH),ENSBGRG00000010459(CDK19),ENSBGRG00000011372(BMP2K),ENSBGRG00000016159(NEK7),ENSBGRG00000020056(DLG1),ENSBGRG…
BP	GO:0051128	regulation of cellular component organization	175	1571	ENSBGRG00000000074(N6AMT1),ENSBGRG00000000197(EPHA3),ENSBGRG00000000405(MFSD2A),ENSBGRG00000000428(ATR),ENSBGRG00000000520(DPYSL2),ENSBGRG00000000587(GPSM2),ENSBGRG00000000593(PRKAA2),ENSBGRG00000000764(CDKN1B),ENSBGRG00000000909(FSTL4),ENSBGRG00000000977(CERS1),ENSBGRG00000001004(VDAC1),ENSBGRG00000001078(WNT10B),ENSBGRG00000001111(C9orf72),ENSBGRG00000001266(PSRC1),ENSBGRG00000001451(CHMP5),ENS…	0.00108913	0.074458		ko05133	Pertussis	Human Diseases	Infectious disease: bacterial	7	67	ENSBGRG00000016956(IL12B),ENSBGRG00000022744(PYCARD),ENSBGRG00000003430(C1QC),ENSBGRG00000013000(NOS2),ENSBGRG00000026156,ENSBGRG00000003405(NOD1),ENSBGRG00000004717(ITGA5)	0.358076	0.844629		BP	GO:1900006	positive regulation of dendrite development	6	126	0.00292347	0.117496	ENSBGRG00000007622(SMAD1),ENSBGRG00000009644(PPP1R9A),ENSBGRG00000011253(EHMT1),ENSBGRG00000012799(FBXW8),ENSBGRG00000024381(EEF2K),ENSBGRG00000024536(BMP5)
BP	GO:0065008	regulation of biological quality	259	2438	ENSBGRG00000000213(NFE2L2),ENSBGRG00000000215(PLCL2),ENSBGRG00000000221(F3),ENSBGRG00000000266(PROS1),ENSBGRG00000000283(HP1BP3),ENSBGRG00000000405(MFSD2A),ENSBGRG00000000520(DPYSL2),ENSBGRG00000000542(CRTC1),ENSBGRG00000000587(GPSM2),ENSBGRG00000000593(PRKAA2),ENSBGRG00000000673(ADCY6),ENSBGRG00000000770(ECE1),ENSBGRG00000000909(FSTL4),ENSBGRG00000001078(WNT10B),ENSBGRG00000001317(SLC25A36),ENSB…	0.00114586	0.076991		ko05340	Primary immunodeficiency	Human Diseases	Immune disease	4	35	ENSBGRG00000018381,ENSBGRG00000012246(ICOS),ENSBGRG00000009260,ENSBGRG00000009800(AICDA)	0.358327	0.844629		MF	GO:0016740	transferase activity	38	2136	0.00294409	0.0653791	ENSBGRG00000000629(GNPTAB),ENSBGRG00000002518(DDR2),ENSBGRG00000004461(LRRK1),ENSBGRG00000004626(CBLB),ENSBGRG00000005235(TENT2),ENSBGRG00000005383(DGKH),ENSBGRG00000005984(CSNK1D),ENSBGRG00000006051(CDC42BPA),ENSBGRG00000006060(IGF1R),ENSBGRG00000006248(PIKFYVE),ENSBGRG00000007714(RNF144B),ENSBGRG00000008227(UBR5),ENSBGRG00000008434(UBE2Q1),ENSBGRG00000008463(TLK1),ENSBGRG00000009140(PRKCH),ENSB…
BP	GO:0019220	regulation of phosphate metabolic process	119	1013	ENSBGRG00000000405(MFSD2A),ENSBGRG00000000764(CDKN1B),ENSBGRG00000001111(C9orf72),ENSBGRG00000001150(PRKAG1),ENSBGRG00000001845(KAT2B),ENSBGRG00000001895(ZBTB20),ENSBGRG00000002134(CAV1),ENSBGRG00000002486(XRCC5),ENSBGRG00000003096(PROK1),ENSBGRG00000003251(GLIPR2),ENSBGRG00000003405(NOD1),ENSBGRG00000003668(APOA1),ENSBGRG00000004146(RNF149),ENSBGRG00000004203(SEMA7A),ENSBGRG00000004372(NTRK2),EN…	0.00115776	0.076991		ko05219	Bladder cancer	Human Diseases	Cancer: specific types	4	35	ENSBGRG00000005672(SRC),ENSBGRG00000005913(DAPK1),ENSBGRG00000017575(FGFR3),ENSBGRG00000020100(RB1)	0.358327	0.844629		BP	GO:0014887	cardiac muscle adaptation	3	26	0.00295695	0.11772	ENSBGRG00000008351(MYH7),ENSBGRG00000010412(ATP2A2),ENSBGRG00000023693(MLIP)
BP	GO:0051174	regulation of phosphorus metabolic process	119	1013	ENSBGRG00000000405(MFSD2A),ENSBGRG00000000764(CDKN1B),ENSBGRG00000001111(C9orf72),ENSBGRG00000001150(PRKAG1),ENSBGRG00000001845(KAT2B),ENSBGRG00000001895(ZBTB20),ENSBGRG00000002134(CAV1),ENSBGRG00000002486(XRCC5),ENSBGRG00000003096(PROK1),ENSBGRG00000003251(GLIPR2),ENSBGRG00000003405(NOD1),ENSBGRG00000003668(APOA1),ENSBGRG00000004146(RNF149),ENSBGRG00000004203(SEMA7A),ENSBGRG00000004372(NTRK2),EN…	0.00115776	0.076991		ko04142	Lysosome	Cellular Processes	Transport and catabolism	12	122	ENSBGRG00000005773(ARSB),ENSBGRG00000017029(GNS),ENSBGRG00000022099(LAPTM5),ENSBGRG00000021305(CLTC),ENSBGRG00000005040,ENSBGRG00000014114(HGSNAT),ENSBGRG00000012355(NAGPA),ENSBGRG00000007223(GM2A),ENSBGRG00000013284(AP3B2),ENSBGRG00000010420(NAGA),ENSBGRG00000003553(AP1M2),ENSBGRG00000009889(ATP6V0A1)	0.363152	0.84993		BP	GO:0120035	regulation of plasma membrane bounded cell projection organization	21	978	0.00305107	0.120332	ENSBGRG00000001761(IFRD1),ENSBGRG00000002518(DDR2),ENSBGRG00000003960(ENAH),ENSBGRG00000005379(ATG5),ENSBGRG00000006060(IGF1R),ENSBGRG00000007622(SMAD1),ENSBGRG00000008613(ENSBGRG00000008613),ENSBGRG00000009278(TMEM67),ENSBGRG00000009644(PPP1R9A),ENSBGRG00000011253(EHMT1),ENSBGRG00000011855(ATP8B1),ENSBGRG00000012799(FBXW8),ENSBGRG00000015942(EBF1),ENSBGRG00000016288(MAGI2),ENSBGRG00000017494(DOC…
MF	GO:0016772	transferase activity, transferring phosphorus-containing groups	93	777	ENSBGRG00000000197(EPHA3),ENSBGRG00000000428(ATR),ENSBGRG00000000593(PRKAA2),ENSBGRG00000000918(STK36),ENSBGRG00000001150(PRKAG1),ENSBGRG00000001167(PRKACB),ENSBGRG00000001329(STK17B),ENSBGRG00000001473(GUCY2C),ENSBGRG00000001869(DTYMK),ENSBGRG00000001978(TGFBR3),ENSBGRG00000002568(MAP3K2),ENSBGRG00000003065(AK5),ENSBGRG00000003271(CEPT1),ENSBGRG00000003767(TENT5A),ENSBGRG00000004372(NTRK2),ENSBG…	0.00117905	0.107368		ko04218	Cellular senescence	Cellular Processes	Cell growth and death	13	134	ENSBGRG00000015132(RASSF5),ENSBGRG00000007174(FOXO3),ENSBGRG00000001004(VDAC1),ENSBGRG00000014113(ATM),ENSBGRG00000011864(NBN),ENSBGRG00000020100(RB1),ENSBGRG00000000428(ATR),ENSBGRG00000002633(PPP3CA),ENSBGRG00000016090(MAPKAPK2),ENSBGRG00000021342(MRE11),ENSBGRG00000024969(RBL2),ENSBGRG00000025440(SERPINE1),ENSBGRG00000021975(LIN54)	0.373223	0.863021		BP	GO:0048812	neuron projection morphogenesis	24	1179	0.00308756	0.120644	ENSBGRG00000001761(IFRD1),ENSBGRG00000002518(DDR2),ENSBGRG00000002824(USP33),ENSBGRG00000003783(SPTB),ENSBGRG00000003960(ENAH),ENSBGRG00000005231(NIBAN2),ENSBGRG00000006060(IGF1R),ENSBGRG00000007622(SMAD1),ENSBGRG00000009644(PPP1R9A),ENSBGRG00000010459(CDK19),ENSBGRG00000011253(EHMT1),ENSBGRG00000011372(BMP2K),ENSBGRG00000012099(LAMA2),ENSBGRG00000012463(RERE),ENSBGRG00000012799(FBXW8),ENSBGRG000…
BP	GO:0006351	transcription, DNA-templated	253	2377	ENSBGRG00000000004(VGLL3),ENSBGRG00000000061(GABPA),ENSBGRG00000000213(NFE2L2),ENSBGRG00000000235,ENSBGRG00000000283(HP1BP3),ENSBGRG00000000285(CIART),ENSBGRG00000000461(NR4A3),ENSBGRG00000000535,ENSBGRG00000000542(CRTC1),ENSBGRG00000000726(PPIE),ENSBGRG00000000764(CDKN1B),ENSBGRG00000000867(IKZF4),ENSBGRG00000000918(STK36),ENSBGRG00000001078(WNT10B),ENSBGRG00000001422(RPAP2),ENSBGRG00000001485(N…	0.00119	0.0777617		ko04727	GABAergic synapse	Organismal Systems	Nervous system	8	79	ENSBGRG00000000798(GABRG2),ENSBGRG00000017235(SLC38A5),ENSBGRG00000022468(SLC38A1),ENSBGRG00000000673(ADCY6),ENSBGRG00000001167(PRKACB),ENSBGRG00000023559(PRKACA),ENSBGRG00000021286(NSF),ENSBGRG00000005672(SRC)	0.373976	0.863021		CC	GO:0000407	phagophore assembly site	3	27	0.00309012	0.1733	ENSBGRG00000005379(ATG5),ENSBGRG00000021132(VMP1),ENSBGRG00000021365(PIK3C3)
BP	GO:0090304	nucleic acid metabolic process	352	3421	ENSBGRG00000000004(VGLL3),ENSBGRG00000000061(GABPA),ENSBGRG00000000074(N6AMT1),ENSBGRG00000000213(NFE2L2),ENSBGRG00000000235,ENSBGRG00000000283(HP1BP3),ENSBGRG00000000285(CIART),ENSBGRG00000000351(EEPD1),ENSBGRG00000000440(PYM1),ENSBGRG00000000461(NR4A3),ENSBGRG00000000535,ENSBGRG00000000542(CRTC1),ENSBGRG00000000645(GMNC),ENSBGRG00000000726(PPIE),ENSBGRG00000000764(CDKN1B),ENSBGRG00000000785(DDX…	0.00119061	0.0777617		ko00520	Amino sugar and nucleotide sugar metabolism	Metabolism	Carbohydrate metabolism	5	47	ENSBGRG00000011917(HK1),ENSBGRG00000003060(GNE),ENSBGRG00000010367(UGP2),ENSBGRG00000004514(GFPT1),ENSBGRG00000019837(CYB5R4)	0.383581	0.879041		CC	GO:0005859	muscle myosin complex	3	27	0.00309012	0.1733	ENSBGRG00000004749(MYL1),ENSBGRG00000007922(MYH6),ENSBGRG00000008351(MYH7)
BP	GO:1901700	response to oxygen-containing compound	96	791	ENSBGRG00000000061(GABPA),ENSBGRG00000000197(EPHA3),ENSBGRG00000000213(NFE2L2),ENSBGRG00000000593(PRKAA2),ENSBGRG00000000673(ADCY6),ENSBGRG00000000977(CERS1),ENSBGRG00000001078(WNT10B),ENSBGRG00000001451(CHMP5),ENSBGRG00000001529(GRAMD1C),ENSBGRG00000001621(AQP3),ENSBGRG00000001756(NUGGC),ENSBGRG00000001845(KAT2B),ENSBGRG00000001895(ZBTB20),ENSBGRG00000001929(EPS8),ENSBGRG00000001978(TGFBR3),ENSB…	0.00125703	0.0799847		ko05100	Bacterial invasion of epithelial cells	Human Diseases	Infectious disease: bacterial	7	69	ENSBGRG00000021305(CLTC),ENSBGRG00000001628(SEPTIN2),ENSBGRG00000004717(ITGA5),ENSBGRG00000005168,ENSBGRG00000005672(SRC),ENSBGRG00000003534(ACTR3),ENSBGRG00000002134(CAV1)	0.387205	0.881224		CC	GO:0031095	platelet dense tubular network membrane	2	8	0.00318163	0.1733	ENSBGRG00000001728(ITPR2),ENSBGRG00000010412(ATP2A2)
BP	GO:0003094	glomerular filtration	6	15	ENSBGRG00000003951(AQP1),ENSBGRG00000006217(XPNPEP3),ENSBGRG00000008828(MYO1E),ENSBGRG00000018147(UMOD),ENSBGRG00000024816(ADGRF5),ENSBGRG00000026642(EMP2)	0.00127029	0.0799847		ko04650	Natural killer cell mediated cytotoxicity	Organismal Systems	Immune system	10	103	ENSBGRG00000017283(FAS),ENSBGRG00000015997,ENSBGRG00000002633(PPP3CA),ENSBGRG00000005168,ENSBGRG00000019275(PLCG2),ENSBGRG00000007038(FASLG),ENSBGRG00000020643,ENSBGRG00000000131(IFNAR2),ENSBGRG00000004554(VAV2),ENSBGRG00000009260	0.398633	0.889653		BP	GO:0071702	organic substance transport	46	2790	0.0032589	0.123746	ENSBGRG00000000629(GNPTAB),ENSBGRG00000001141(ABCA1),ENSBGRG00000001728(ITPR2),ENSBGRG00000001896(DENND4C),ENSBGRG00000002944(TOMM70),ENSBGRG00000003322(WDR33),ENSBGRG00000004274(RABGAP1L),ENSBGRG00000004575(SERINC5),ENSBGRG00000004626(CBLB),ENSBGRG00000005343(ENSBGRG00000005343),ENSBGRG00000005379(ATG5),ENSBGRG00000005984(CSNK1D),ENSBGRG00000006060(IGF1R),ENSBGRG00000007817(ATP6V1C1),ENSBGRG0000…
BP	GO:0000904	cell morphogenesis involved in differentiation	57	424	ENSBGRG00000000405(MFSD2A),ENSBGRG00000000520(DPYSL2),ENSBGRG00000000770(ECE1),ENSBGRG00000000909(FSTL4),ENSBGRG00000001111(C9orf72),ENSBGRG00000001761(IFRD1),ENSBGRG00000001923(GAP43),ENSBGRG00000002594(GLI2),ENSBGRG00000002633(PPP3CA),ENSBGRG00000003262(TMEM106B),ENSBGRG00000003668(APOA1),ENSBGRG00000004203(SEMA7A),ENSBGRG00000004564(ZNF385A),ENSBGRG00000005119(TTC8),ENSBGRG00000005329(OTX2),EN…	0.00127782	0.0799847		ko04630	JAK-STAT signaling pathway	Environmental Information Processing	Signal transduction	15	159	ENSBGRG00000023249(LEP),ENSBGRG00000016956(IL12B),ENSBGRG00000002683(IL13),ENSBGRG00000016285,ENSBGRG00000022493(PIAS1),ENSBGRG00000000131(IFNAR2),ENSBGRG00000025800,ENSBGRG00000010257(STAT3),ENSBGRG00000002374(IL9),ENSBGRG00000020779(CSF3),ENSBGRG00000010846(STAT5A),ENSBGRG00000000962(MCL1),ENSBGRG00000001789(STAT1),ENSBGRG00000011349(CNTF),ENSBGRG00000023528(IL11)	0.40025	0.889653		BP	GO:0048813	dendrite morphogenesis	11	374	0.0032768	0.123746	ENSBGRG00000003960(ENAH),ENSBGRG00000007622(SMAD1),ENSBGRG00000009644(PPP1R9A),ENSBGRG00000011253(EHMT1),ENSBGRG00000011372(BMP2K),ENSBGRG00000012463(RERE),ENSBGRG00000012799(FBXW8),ENSBGRG00000015942(EBF1),ENSBGRG00000018952(TRAK1),ENSBGRG00000024381(EEF2K),ENSBGRG00000024679(PICALM)
BP	GO:0045834	positive regulation of lipid metabolic process	17	85	ENSBGRG00000000405(MFSD2A),ENSBGRG00000001895(ZBTB20),ENSBGRG00000003668(APOA1),ENSBGRG00000004554(VAV2),ENSBGRG00000005861(LDLR),ENSBGRG00000010536(FGF2),ENSBGRG00000011705(CNEP1R1),ENSBGRG00000011880(MLXIPL),ENSBGRG00000012214(SCARB1),ENSBGRG00000017575(FGFR3),ENSBGRG00000018041(MLYCD),ENSBGRG00000018786(PTGS2),ENSBGRG00000019509(ELOVL5),ENSBGRG00000020463(NR1D1),ENSBGRG00000021837(CGA),ENSBGRG…	0.00127822	0.0799847		ko05230	Central carbon metabolism in cancer	Human Diseases	Cancer: overview	6	59	ENSBGRG00000012269(TIGAR),ENSBGRG00000004498(PFKP),ENSBGRG00000017575(FGFR3),ENSBGRG00000012192(NTRK3),ENSBGRG00000011917(HK1),ENSBGRG00000005369(FLT3)	0.402	0.889653		BP	GO:0043501	skeletal muscle adaptation	3	27	0.00329947	0.123746	ENSBGRG00000008351(MYH7),ENSBGRG00000010412(ATP2A2),ENSBGRG00000022578(CFLAR)
BP	GO:0097659	nucleic acid-templated transcription	253	2380	ENSBGRG00000000004(VGLL3),ENSBGRG00000000061(GABPA),ENSBGRG00000000213(NFE2L2),ENSBGRG00000000235,ENSBGRG00000000283(HP1BP3),ENSBGRG00000000285(CIART),ENSBGRG00000000461(NR4A3),ENSBGRG00000000535,ENSBGRG00000000542(CRTC1),ENSBGRG00000000726(PPIE),ENSBGRG00000000764(CDKN1B),ENSBGRG00000000867(IKZF4),ENSBGRG00000000918(STK36),ENSBGRG00000001078(WNT10B),ENSBGRG00000001422(RPAP2),ENSBGRG00000001485(N…	0.00127932	0.0799847		ko05022	Pathways of neurodegeneration - multiple diseases	Human Diseases	Neurodegenerative disease	38	421	ENSBGRG00000006531(DNALI1),ENSBGRG00000007038(FASLG),ENSBGRG00000020965(MAP3K10),ENSBGRG00000010593(PDYN),ENSBGRG00000012730(NDUFA8),ENSBGRG00000014168(UBE2J2),ENSBGRG00000001452(TUBA1B),ENSBGRG00000016285,ENSBGRG00000018786(PTGS2),ENSBGRG00000013000(NOS2),ENSBGRG00000015642(PRKN),ENSBGRG00000012006(DNAI2),ENSBGRG00000021126(PSMC4),ENSBGRG00000026030(TUBB4A),ENSBGRG00000019027(ATP2A3),ENSBGRG0000…	0.412592	0.889653		BP	GO:0010976	positive regulation of neuron projection development	12	430	0.0033099	0.123746	ENSBGRG00000002518(DDR2),ENSBGRG00000006060(IGF1R),ENSBGRG00000007622(SMAD1),ENSBGRG00000009644(PPP1R9A),ENSBGRG00000011253(EHMT1),ENSBGRG00000012799(FBXW8),ENSBGRG00000016288(MAGI2),ENSBGRG00000018952(TRAK1),ENSBGRG00000022578(CFLAR),ENSBGRG00000024381(EEF2K),ENSBGRG00000024536(BMP5),ENSBGRG00000024679(PICALM)
BP	GO:0016310	phosphorylation	170	1527	ENSBGRG00000000197(EPHA3),ENSBGRG00000000428(ATR),ENSBGRG00000000593(PRKAA2),ENSBGRG00000000764(CDKN1B),ENSBGRG00000000918(STK36),ENSBGRG00000001111(C9orf72),ENSBGRG00000001150(PRKAG1),ENSBGRG00000001167(PRKACB),ENSBGRG00000001329(STK17B),ENSBGRG00000001473(GUCY2C),ENSBGRG00000001845(KAT2B),ENSBGRG00000001895(ZBTB20),ENSBGRG00000001978(TGFBR3),ENSBGRG00000002134(CAV1),ENSBGRG00000002486(XRCC5),EN…	0.00132448	0.0819722		ko05131	Shigellosis	Human Diseases	Infectious disease: bacterial	21	228	ENSBGRG00000006329(CYTH4),ENSBGRG00000021365(PIK3C3),ENSBGRG00000003405(NOD1),ENSBGRG00000024701(U2AF1L4),ENSBGRG00000007174(FOXO3),ENSBGRG00000013464(PLCD1),ENSBGRG00000016285,ENSBGRG00000021211,ENSBGRG00000003534(ACTR3),ENSBGRG00000014113(ATM),ENSBGRG00000001004(VDAC1),ENSBGRG00000022326(TRAF5),ENSBGRG00000005672(SRC),ENSBGRG00000025775(CYTH3),ENSBGRG00000009042(RIPK1),ENSBGRG00000004717(ITGA5)…	0.412648	0.889653		BP	GO:0006116	NADH oxidation	2	8	0.00333009	0.123746	ENSBGRG00000000599(ENSBGRG00000000599),ENSBGRG00000026591(ENSBGRG00000026591)
MF	GO:0005125	cytokine activity	20	110	ENSBGRG00000006117,ENSBGRG00000006139,ENSBGRG00000010021(CCL20),ENSBGRG00000010536(FGF2),ENSBGRG00000010963,ENSBGRG00000012992,ENSBGRG00000014317,ENSBGRG00000014599,ENSBGRG00000014645(IL36G),ENSBGRG00000015837(CXCL9),ENSBGRG00000016094(CCL28),ENSBGRG00000016956(IL12B),ENSBGRG00000018824(CXCL12),ENSBGRG00000019180(IL17B),ENSBGRG00000020605(IL26),ENSBGRG00000020779(CSF3),ENSBGRG00000021331,ENSBGRG0…	0.00132626	0.110739		ko04350	TGF-beta signaling pathway	Environmental Information Processing	Signal transduction	8	82	ENSBGRG00000022806(TGIF1),ENSBGRG00000004989(ACVR2A),ENSBGRG00000009912(PPP2R1B),ENSBGRG00000017354(BMPR2),ENSBGRG00000024537(SMAD4),ENSBGRG00000015364(FBN1),ENSBGRG00000002538(SMAD5),ENSBGRG00000010683(NEO1)	0.414589	0.889653		BP	GO:0048513	animal organ development	70	4720	0.00335173	0.123746	ENSBGRG00000000266(PROS1),ENSBGRG00000000599(ENSBGRG00000000599),ENSBGRG00000000629(GNPTAB),ENSBGRG00000002518(DDR2),ENSBGRG00000002944(TOMM70),ENSBGRG00000003783(SPTB),ENSBGRG00000003960(ENAH),ENSBGRG00000004149(PTBP3),ENSBGRG00000004274(RABGAP1L),ENSBGRG00000004461(LRRK1),ENSBGRG00000004626(CBLB),ENSBGRG00000005231(NIBAN2),ENSBGRG00000005235(TENT2),ENSBGRG00000005379(ATG5),ENSBGRG00000005984(CS…
BP	GO:0048663	neuron fate commitment	13	57	ENSBGRG00000002594(GLI2),ENSBGRG00000006002(JAG2),ENSBGRG00000008234(DMRTA2),ENSBGRG00000008619(SIX1),ENSBGRG00000010658(DLX1),ENSBGRG00000010765(DLX2),ENSBGRG00000012869(EYA1),ENSBGRG00000015789(TBR1),ENSBGRG00000016979(HOXD10),ENSBGRG00000021292(ISL2),ENSBGRG00000024537(SMAD4),ENSBGRG00000024850(LHX3),ENSBGRG00000026510(FEZF2)	0.00133352	0.0819722		ko04723	Retrograde endocannabinoid signaling	Organismal Systems	Nervous system	12	127	ENSBGRG00000012730(NDUFA8),ENSBGRG00000018786(PTGS2),ENSBGRG00000025849(DAGLB),ENSBGRG00000000798(GABRG2),ENSBGRG00000008576,ENSBGRG00000010476(GRIA3),ENSBGRG00000010730(NDUFA6),ENSBGRG00000000673(ADCY6),ENSBGRG00000023559(PRKACA),ENSBGRG00000001167(PRKACB),ENSBGRG00000007869(KCNJ3),ENSBGRG00000020983(GRIA4)	0.417362	0.889653		BP	GO:1902903	regulation of supramolecular fiber organization	12	431	0.00337222	0.123746	ENSBGRG00000003960(ENAH),ENSBGRG00000004749(MYL1),ENSBGRG00000005984(CSNK1D),ENSBGRG00000008613(ENSBGRG00000008613),ENSBGRG00000009644(PPP1R9A),ENSBGRG00000011309(ARHGAP18),ENSBGRG00000013584(NOX4),ENSBGRG00000015284(SPTBN1),ENSBGRG00000019601(CAMSAP2),ENSBGRG00000020056(DLG1),ENSBGRG00000024593(TGFBR2),ENSBGRG00000024670(LMOD2)
BP	GO:0006865	amino acid transport	15	71	ENSBGRG00000002454(LRRC8D),ENSBGRG00000004372(NTRK2),ENSBGRG00000005554(SLC43A1),ENSBGRG00000006751(SLC7A1),ENSBGRG00000007536(SLC6A19),ENSBGRG00000008855(CLN8),ENSBGRG00000010102(P2RX7),ENSBGRG00000010376(SLC15A4),ENSBGRG00000011584(ACE2),ENSBGRG00000016741(SLC1A6),ENSBGRG00000017235(SLC38A5),ENSBGRG00000019545(SLC6A6),ENSBGRG00000019559(LLGL2),ENSBGRG00000020657(EPM2A),ENSBGRG00000022468(SLC38A…	0.00135704	0.0827227		ko00440	Phosphonate and phosphinate metabolism	Metabolism	Metabolism of other amino acids	1	6	ENSBGRG00000003271(CEPT1)	0.418687	0.889653		BP	GO:0007274	neuromuscular synaptic transmission	6	130	0.00341301	0.124163	ENSBGRG00000006060(IGF1R),ENSBGRG00000010412(ATP2A2),ENSBGRG00000014267(DNAJC5),ENSBGRG00000015284(SPTBN1),ENSBGRG00000021677(SYNCRIP),ENSBGRG00000024536(BMP5)
MF	GO:0000981	DNA-binding transcription factor activity, RNA polymerase II-specific	74	596	ENSBGRG00000000061(GABPA),ENSBGRG00000000213(NFE2L2),ENSBGRG00000000461(NR4A3),ENSBGRG00000001485(NFX1),ENSBGRG00000001789(STAT1),ENSBGRG00000001895(ZBTB20),ENSBGRG00000001954(ZNF395),ENSBGRG00000002039(HOXA6),ENSBGRG00000002070(GLIS1),ENSBGRG00000002072(hoxA10),ENSBGRG00000002337(ETV5),ENSBGRG00000002538(SMAD5),ENSBGRG00000002594(GLI2),ENSBGRG00000002783(RORC),ENSBGRG00000003613(PBX3),ENSBGRG000…	0.00138935	0.110739		ko04940	Type I diabetes mellitus	Human Diseases	Endocrine and metabolic disease	5	49	ENSBGRG00000019419(CPE),ENSBGRG00000016956(IL12B),ENSBGRG00000022452,ENSBGRG00000017283(FAS),ENSBGRG00000007038(FASLG)	0.418917	0.889653		MF	GO:0046975	histone methyltransferase activity (H3-K36 specific)	2	8	0.00347126	0.0721126	ENSBGRG00000016971(NSD3),ENSBGRG00000019016(SETD3)
MF	GO:0140096	catalytic activity, acting on a protein	189	1761	ENSBGRG00000000074(N6AMT1),ENSBGRG00000000197(EPHA3),ENSBGRG00000000221(F3),ENSBGRG00000000428(ATR),ENSBGRG00000000593(PRKAA2),ENSBGRG00000000711(METAP2),ENSBGRG00000000726(PPIE),ENSBGRG00000000770(ECE1),ENSBGRG00000000918(STK36),ENSBGRG00000001150(PRKAG1),ENSBGRG00000001167(PRKACB),ENSBGRG00000001329(STK17B),ENSBGRG00000001422(RPAP2),ENSBGRG00000001424(LONP1),ENSBGRG00000001473(GUCY2C),ENSBGRG00…	0.00144409	0.110739		ko03440	Homologous recombination	Genetic Information Processing	Replication and repair	4	38	ENSBGRG00000024546,ENSBGRG00000021342(MRE11),ENSBGRG00000014113(ATM),ENSBGRG00000011864(NBN)	0.418952	0.889653		MF	GO:0051425	PTB domain binding	2	8	0.00347126	0.0721126	ENSBGRG00000006060(IGF1R),ENSBGRG00000011372(BMP2K)
BP	GO:0051234	establishment of localization	310	2985	ENSBGRG00000000082(GRIK1),ENSBGRG00000000197(EPHA3),ENSBGRG00000000213(NFE2L2),ENSBGRG00000000250(ATP13A5),ENSBGRG00000000351(EEPD1),ENSBGRG00000000405(MFSD2A),ENSBGRG00000000428(ATR),ENSBGRG00000000461(NR4A3),ENSBGRG00000000587(GPSM2),ENSBGRG00000000764(CDKN1B),ENSBGRG00000000785(DDX39A),ENSBGRG00000000798(GABRG2),ENSBGRG00000000918(STK36),ENSBGRG00000001004(VDAC1),ENSBGRG00000001111(C9orf72),EN…	0.00147264	0.0880811		ko05169	Epstein-Barr virus infection	Human Diseases	Infectious disease: viral	18	195	ENSBGRG00000015635(PSMD14),ENSBGRG00000000764(CDKN1B),ENSBGRG00000021126(PSMC4),ENSBGRG00000009260,ENSBGRG00000010435(SAP30L),ENSBGRG00000011453,ENSBGRG00000023716(SIN3A),ENSBGRG00000022326(TRAF5),ENSBGRG00000008748,ENSBGRG00000000131(IFNAR2),ENSBGRG00000022452,ENSBGRG00000009042(RIPK1),ENSBGRG00000020100(RB1),ENSBGRG00000001789(STAT1),ENSBGRG00000019275(PLCG2),ENSBGRG00000010257(STAT3),ENSBGRG00…	0.420563	0.889653		BP	GO:0060537	muscle tissue development	13	490	0.00348297	0.124557	ENSBGRG00000001761(IFRD1),ENSBGRG00000002944(TOMM70),ENSBGRG00000005231(NIBAN2),ENSBGRG00000005379(ATG5),ENSBGRG00000006350(GPCPD1),ENSBGRG00000007622(SMAD1),ENSBGRG00000007922(MYH6),ENSBGRG00000008351(MYH7),ENSBGRG00000013584(NOX4),ENSBGRG00000020056(DLG1),ENSBGRG00000022578(CFLAR),ENSBGRG00000024536(BMP5),ENSBGRG00000024593(TGFBR2)
BP	GO:0060986	endocrine hormone secretion	8	26	ENSBGRG00000003951(AQP1),ENSBGRG00000008588(REN),ENSBGRG00000015409(CRY1),ENSBGRG00000018911(RAB11FIP1),ENSBGRG00000019832(C1QTNF1),ENSBGRG00000023482(GALR1),ENSBGRG00000024537(SMAD4),ENSBGRG00000025055(SELENOM)	0.00147822	0.0880811		ko04725	Cholinergic synapse	Organismal Systems	Nervous system	9	94	ENSBGRG00000007268(PIK3CG),ENSBGRG00000026668(PIK3R6),ENSBGRG00000011798(CHAT),ENSBGRG00000019755(CHRNA3),ENSBGRG00000021420(CAMK2A),ENSBGRG00000001167(PRKACB),ENSBGRG00000023559(PRKACA),ENSBGRG00000000673(ADCY6),ENSBGRG00000007869(KCNJ3)	0.425346	0.894039		BP	GO:0050794	regulation of cellular process	135	10582	0.00350768	0.124557	ENSBGRG00000000139(SON),ENSBGRG00000000262(BOLL),ENSBGRG00000000266(PROS1),ENSBGRG00000000973(FGD6),ENSBGRG00000001141(ABCA1),ENSBGRG00000001728(ITPR2),ENSBGRG00000001761(IFRD1),ENSBGRG00000001896(DENND4C),ENSBGRG00000002023(ZNF596),ENSBGRG00000002158(HMBOX1),ENSBGRG00000002518(DDR2),ENSBGRG00000002693(APBB2),ENSBGRG00000002824(USP33),ENSBGRG00000002944(TOMM70),ENSBGRG00000003783(SPTB),ENSBGRG000…
BP	GO:0006915	apoptotic process	128	1109	ENSBGRG00000000213(NFE2L2),ENSBGRG00000000221(F3),ENSBGRG00000000593(PRKAA2),ENSBGRG00000000682(CECR2),ENSBGRG00000000764(CDKN1B),ENSBGRG00000000766(TRIM35),ENSBGRG00000000962(MCL1),ENSBGRG00000001004(VDAC1),ENSBGRG00000001078(WNT10B),ENSBGRG00000001329(STK17B),ENSBGRG00000001347(LMBR1L),ENSBGRG00000001666(CASP6),ENSBGRG00000001756(NUGGC),ENSBGRG00000001892(ING5),ENSBGRG00000002134(CAV1),ENSBGRG0…	0.00148106	0.0880811		ko05134	Legionellosis	Human Diseases	Infectious disease: bacterial	5	50	ENSBGRG00000017504(HBS1L),ENSBGRG00000016956(IL12B),ENSBGRG00000021211,ENSBGRG00000012200(CLK4),ENSBGRG00000022744(PYCARD)	0.436466	0.908474		BP	GO:0120039	plasma membrane bounded cell projection morphogenesis	24	1191	0.0035124	0.124557	ENSBGRG00000001761(IFRD1),ENSBGRG00000002518(DDR2),ENSBGRG00000002824(USP33),ENSBGRG00000003783(SPTB),ENSBGRG00000003960(ENAH),ENSBGRG00000005231(NIBAN2),ENSBGRG00000006060(IGF1R),ENSBGRG00000007622(SMAD1),ENSBGRG00000009644(PPP1R9A),ENSBGRG00000010459(CDK19),ENSBGRG00000011253(EHMT1),ENSBGRG00000011372(BMP2K),ENSBGRG00000012099(LAMA2),ENSBGRG00000012463(RERE),ENSBGRG00000012799(FBXW8),ENSBGRG000…
BP	GO:0031327	negative regulation of cellular biosynthetic process	113	962	ENSBGRG00000000061(GABPA),ENSBGRG00000000285(CIART),ENSBGRG00000000428(ATR),ENSBGRG00000000764(CDKN1B),ENSBGRG00000000867(IKZF4),ENSBGRG00000000920(ZRANB3),ENSBGRG00000000977(CERS1),ENSBGRG00000001078(WNT10B),ENSBGRG00000001485(NFX1),ENSBGRG00000001895(ZBTB20),ENSBGRG00000001901(FOXP2),ENSBGRG00000002070(GLIS1),ENSBGRG00000002134(CAV1),ENSBGRG00000002228(IGFBP5),ENSBGRG00000002337(ETV5),ENSBGRG00…	0.00154204	0.0907416		ko04726	Serotonergic synapse	Organismal Systems	Nervous system	9	95	ENSBGRG00000025402(ALOX15),ENSBGRG00000001167(PRKACB),ENSBGRG00000023559(PRKACA),ENSBGRG00000007869(KCNJ3),ENSBGRG00000000906(CYP4X1),ENSBGRG00000013578,ENSBGRG00000025285,ENSBGRG00000019173(SLC18A2),ENSBGRG00000018786(PTGS2)	0.438026	0.908474		BP	GO:0048858	cell projection morphogenesis	24	1194	0.00362602	0.126784	ENSBGRG00000001761(IFRD1),ENSBGRG00000002518(DDR2),ENSBGRG00000002824(USP33),ENSBGRG00000003783(SPTB),ENSBGRG00000003960(ENAH),ENSBGRG00000005231(NIBAN2),ENSBGRG00000006060(IGF1R),ENSBGRG00000007622(SMAD1),ENSBGRG00000009644(PPP1R9A),ENSBGRG00000010459(CDK19),ENSBGRG00000011253(EHMT1),ENSBGRG00000011372(BMP2K),ENSBGRG00000012099(LAMA2),ENSBGRG00000012463(RERE),ENSBGRG00000012799(FBXW8),ENSBGRG000…
BP	GO:0007409	axonogenesis	37	249	ENSBGRG00000000520(DPYSL2),ENSBGRG00000000770(ECE1),ENSBGRG00000000909(FSTL4),ENSBGRG00000001111(C9orf72),ENSBGRG00000001761(IFRD1),ENSBGRG00000001923(GAP43),ENSBGRG00000002594(GLI2),ENSBGRG00000004203(SEMA7A),ENSBGRG00000005119(TTC8),ENSBGRG00000005329(OTX2),ENSBGRG00000005332(STXBP1),ENSBGRG00000005442(CYFIP1),ENSBGRG00000006057(RND2),ENSBGRG00000007842(KLF7),ENSBGRG00000008697(KEL),ENSBGRG0000…	0.00155061	0.0907416		ko00500	Starch and sucrose metabolism	Metabolism	Carbohydrate metabolism	3	28	ENSBGRG00000004485(G6PC3),ENSBGRG00000010367(UGP2),ENSBGRG00000011917(HK1)	0.440472	0.908474		BP	GO:0022008	neurogenesis	42	2499	0.00363565	0.126784	ENSBGRG00000001761(IFRD1),ENSBGRG00000002518(DDR2),ENSBGRG00000002824(USP33),ENSBGRG00000003783(SPTB),ENSBGRG00000003960(ENAH),ENSBGRG00000004626(CBLB),ENSBGRG00000005231(NIBAN2),ENSBGRG00000005235(TENT2),ENSBGRG00000005984(CSNK1D),ENSBGRG00000006060(IGF1R),ENSBGRG00000007622(SMAD1),ENSBGRG00000008613(ENSBGRG00000008613),ENSBGRG00000009140(PRKCH),ENSBGRG00000009278(TMEM67),ENSBGRG00000009644(PPP1…
BP	GO:1903557	positive regulation of tumor necrosis factor superfamily cytokine production	13	58	ENSBGRG00000001895(ZBTB20),ENSBGRG00000003405(NOD1),ENSBGRG00000009042(RIPK1),ENSBGRG00000010257(STAT3),ENSBGRG00000011274(DHX9),ENSBGRG00000015313(ADAM8),ENSBGRG00000016090(MAPKAPK2),ENSBGRG00000016956(IL12B),ENSBGRG00000019275(PLCG2),ENSBGRG00000019776(CLEC7A),ENSBGRG00000021608(SELENOK),ENSBGRG00000022744(PYCARD),ENSBGRG00000023249(LEP)	0.00158015	0.0917364		ko04932	Non-alcoholic fatty liver disease	Human Diseases	Endocrine and metabolic disease	14	154	ENSBGRG00000017283(FAS),ENSBGRG00000000593(PRKAA2),ENSBGRG00000007038(FASLG),ENSBGRG00000017832(CYP2E1),ENSBGRG00000011880(MLXIPL),ENSBGRG00000009598(MLX),ENSBGRG00000001150(PRKAG1),ENSBGRG00000024995,ENSBGRG00000023249(LEP),ENSBGRG00000008576,ENSBGRG00000012730(NDUFA8),ENSBGRG00000016630(PRKAB1),ENSBGRG00000010942(PRKAB2),ENSBGRG00000010730(NDUFA6)	0.462515	0.942455		BP	GO:0016180	snRNA processing	3	28	0.00366531	0.126784	ENSBGRG00000010459(CDK19),ENSBGRG00000013819(INTS10),ENSBGRG00000021952(INTS7)
BP	GO:0032774	RNA biosynthetic process	253	2391	ENSBGRG00000000004(VGLL3),ENSBGRG00000000061(GABPA),ENSBGRG00000000213(NFE2L2),ENSBGRG00000000235,ENSBGRG00000000283(HP1BP3),ENSBGRG00000000285(CIART),ENSBGRG00000000461(NR4A3),ENSBGRG00000000535,ENSBGRG00000000542(CRTC1),ENSBGRG00000000726(PPIE),ENSBGRG00000000764(CDKN1B),ENSBGRG00000000867(IKZF4),ENSBGRG00000000918(STK36),ENSBGRG00000001078(WNT10B),ENSBGRG00000001422(RPAP2),ENSBGRG00000001485(N…	0.00166106	0.0954811		ko04916	Melanogenesis	Organismal Systems	Endocrine system	8	86	ENSBGRG00000001078(WNT10B),ENSBGRG00000001167(PRKACB),ENSBGRG00000023559(PRKACA),ENSBGRG00000000673(ADCY6),ENSBGRG00000019557(WNT5B),ENSBGRG00000007688(FZD6),ENSBGRG00000021420(CAMK2A),ENSBGRG00000012559(DVL1)	0.468482	0.942455		MF	GO:0004672	protein kinase activity	15	602	0.00375368	0.0735211	ENSBGRG00000002518(DDR2),ENSBGRG00000004461(LRRK1),ENSBGRG00000005984(CSNK1D),ENSBGRG00000006051(CDC42BPA),ENSBGRG00000006060(IGF1R),ENSBGRG00000008463(TLK1),ENSBGRG00000009140(PRKCH),ENSBGRG00000010459(CDK19),ENSBGRG00000011372(BMP2K),ENSBGRG00000016159(NEK7),ENSBGRG00000021365(PIK3C3),ENSBGRG00000022891(RAF1),ENSBGRG00000024381(EEF2K),ENSBGRG00000024593(TGFBR2),ENSBGRG00000025235(DBF4)
BP	GO:0036315	cellular response to sterol	5	11	ENSBGRG00000001529(GRAMD1C),ENSBGRG00000002783(RORC),ENSBGRG00000010766(INSIG1),ENSBGRG00000013095(GRAMD1B),ENSBGRG00000019260(OSBPL7)	0.00168381	0.0954811		ko04066	HIF-1 signaling pathway	Environmental Information Processing	Signal transduction	9	98	ENSBGRG00000009029(EGLN3),ENSBGRG00000004498(PFKP),ENSBGRG00000021420(CAMK2A),ENSBGRG00000025440(SERPINE1),ENSBGRG00000010257(STAT3),ENSBGRG00000011917(HK1),ENSBGRG00000000764(CDKN1B),ENSBGRG00000013000(NOS2),ENSBGRG00000019275(PLCG2)	0.475844	0.942455		MF	GO:0042626	ATPase-coupled transmembrane transporter activity	6	130	0.00376738	0.0735211	ENSBGRG00000001141(ABCA1),ENSBGRG00000007817(ATP6V1C1),ENSBGRG00000010412(ATP2A2),ENSBGRG00000014876(ATP7B),ENSBGRG00000020672(ABCG2),ENSBGRG00000023586(ABCC1)
BP	GO:0043031	negative regulation of macrophage activation	5	11	ENSBGRG00000004407(TAFA3),ENSBGRG00000005861(LDLR),ENSBGRG00000008014(CST7),ENSBGRG00000020463(NR1D1),ENSBGRG00000024816(ADGRF5)	0.00168381	0.0954811		ko05223	Non-small cell lung cancer	Human Diseases	Cancer: specific types	6	64	ENSBGRG00000015132(RASSF5),ENSBGRG00000007174(FOXO3),ENSBGRG00000010257(STAT3),ENSBGRG00000019275(PLCG2),ENSBGRG00000010846(STAT5A),ENSBGRG00000020100(RB1)	0.480737	0.942455		BP	GO:0031344	regulation of cell projection organization	21	996	0.00377216	0.128375	ENSBGRG00000001761(IFRD1),ENSBGRG00000002518(DDR2),ENSBGRG00000003960(ENAH),ENSBGRG00000005379(ATG5),ENSBGRG00000006060(IGF1R),ENSBGRG00000007622(SMAD1),ENSBGRG00000008613(ENSBGRG00000008613),ENSBGRG00000009278(TMEM67),ENSBGRG00000009644(PPP1R9A),ENSBGRG00000011253(EHMT1),ENSBGRG00000011855(ATP8B1),ENSBGRG00000012799(FBXW8),ENSBGRG00000015942(EBF1),ENSBGRG00000016288(MAGI2),ENSBGRG00000017494(DOC…
BP	GO:0012501	programmed cell death	131	1143	ENSBGRG00000000213(NFE2L2),ENSBGRG00000000221(F3),ENSBGRG00000000593(PRKAA2),ENSBGRG00000000682(CECR2),ENSBGRG00000000764(CDKN1B),ENSBGRG00000000766(TRIM35),ENSBGRG00000000962(MCL1),ENSBGRG00000001004(VDAC1),ENSBGRG00000001078(WNT10B),ENSBGRG00000001329(STK17B),ENSBGRG00000001347(LMBR1L),ENSBGRG00000001666(CASP6),ENSBGRG00000001756(NUGGC),ENSBGRG00000001892(ING5),ENSBGRG00000002134(CAV1),ENSBGRG0…	0.00170068	0.0956959		ko04137	Mitophagy - animal	Cellular Processes	Transport and catabolism	6	64	ENSBGRG00000007174(FOXO3),ENSBGRG00000013027(RAB7A),ENSBGRG00000015642(PRKN),ENSBGRG00000016285,ENSBGRG00000021811(ATG9A),ENSBGRG00000005672(SRC)	0.480737	0.942455		BP	GO:0061061	muscle structure development	21	996	0.00377216	0.128375	ENSBGRG00000001761(IFRD1),ENSBGRG00000002944(TOMM70),ENSBGRG00000005231(NIBAN2),ENSBGRG00000005379(ATG5),ENSBGRG00000006350(GPCPD1),ENSBGRG00000007922(MYH6),ENSBGRG00000008351(MYH7),ENSBGRG00000008613(ENSBGRG00000008613),ENSBGRG00000010412(ATP2A2),ENSBGRG00000012099(LAMA2),ENSBGRG00000013023(RAPGEF1),ENSBGRG00000013584(NOX4),ENSBGRG00000015942(EBF1),ENSBGRG00000019016(SETD3),ENSBGRG00000020148(FH…
MF	GO:0097159	organic cyclic compound binding	393	3964	ENSBGRG00000000061(GABPA),ENSBGRG00000000074(N6AMT1),ENSBGRG00000000174,ENSBGRG00000000197(EPHA3),ENSBGRG00000000213(NFE2L2),ENSBGRG00000000235,ENSBGRG00000000237(AGPS),ENSBGRG00000000250(ATP13A5),ENSBGRG00000000283(HP1BP3),ENSBGRG00000000285(CIART),ENSBGRG00000000288(PDE11A),ENSBGRG00000000341(RBM45),ENSBGRG00000000351(EEPD1),ENSBGRG00000000420(EIF4G3),ENSBGRG00000000461(NR4A3),ENSBGRG0000000059…	0.00177048	0.126243		ko04659	Th17 cell differentiation	Organismal Systems	Immune system	10	110	ENSBGRG00000001789(STAT1),ENSBGRG00000002633(PPP3CA),ENSBGRG00000022452,ENSBGRG00000010846(STAT5A),ENSBGRG00000002783(RORC),ENSBGRG00000010257(STAT3),ENSBGRG00000021362,ENSBGRG00000024537(SMAD4),ENSBGRG00000017377(EBI3),ENSBGRG00000021331	0.482287	0.942455		BP	GO:0031329	regulation of cellular catabolic process	20	931	0.00381047	0.128642	ENSBGRG00000000262(BOLL),ENSBGRG00000002824(USP33),ENSBGRG00000005235(TENT2),ENSBGRG00000005379(ATG5),ENSBGRG00000005984(CSNK1D),ENSBGRG00000006060(IGF1R),ENSBGRG00000006248(PIKFYVE),ENSBGRG00000007714(RNF144B),ENSBGRG00000007817(ATP6V1C1),ENSBGRG00000009278(TMEM67),ENSBGRG00000009838(NUP214),ENSBGRG00000012799(FBXW8),ENSBGRG00000019456(TBRG4),ENSBGRG00000021132(VMP1),ENSBGRG00000021365(PIK3C3),E…
BP	GO:0035376	sterol import	4	7	ENSBGRG00000003668(APOA1),ENSBGRG00000005861(LDLR),ENSBGRG00000008046(STARD5),ENSBGRG00000012214(SCARB1)	0.00181158	0.097432		ko04136	Autophagy - other	Cellular Processes	Transport and catabolism	3	30	ENSBGRG00000020889(ATG4A),ENSBGRG00000021811(ATG9A),ENSBGRG00000021365(PIK3C3)	0.486669	0.942455		BP	GO:0033043	regulation of organelle organization	29	1550	0.00391448	0.130718	ENSBGRG00000002158(HMBOX1),ENSBGRG00000003960(ENAH),ENSBGRG00000004274(RABGAP1L),ENSBGRG00000004749(MYL1),ENSBGRG00000005235(TENT2),ENSBGRG00000005379(ATG5),ENSBGRG00000005984(CSNK1D),ENSBGRG00000006060(IGF1R),ENSBGRG00000006248(PIKFYVE),ENSBGRG00000008227(UBR5),ENSBGRG00000008463(TLK1),ENSBGRG00000008613(ENSBGRG00000008613),ENSBGRG00000009278(TMEM67),ENSBGRG00000009644(PPP1R9A),ENSBGRG0000001125…
BP	GO:0045117	azole transmembrane transport	4	7	ENSBGRG00000006751(SLC7A1),ENSBGRG00000010376(SLC15A4),ENSBGRG00000017235(SLC38A5),ENSBGRG00000017713(SLC44A4)	0.00181158	0.097432		ko00860	Porphyrin metabolism	Metabolism	Metabolism of cofactors and vitamins	3	30	ENSBGRG00000011055,ENSBGRG00000008637(HEPH),ENSBGRG00000016871(HCCS)	0.486669	0.942455		BP	GO:0051234	establishment of localization	77	5336	0.00393394	0.130718	ENSBGRG00000000266(PROS1),ENSBGRG00000000629(GNPTAB),ENSBGRG00000001141(ABCA1),ENSBGRG00000001484(SEC24B),ENSBGRG00000001728(ITPR2),ENSBGRG00000001896(DENND4C),ENSBGRG00000002944(TOMM70),ENSBGRG00000003322(WDR33),ENSBGRG00000003783(SPTB),ENSBGRG00000003960(ENAH),ENSBGRG00000004086(DENND5B),ENSBGRG00000004274(RABGAP1L),ENSBGRG00000004575(SERINC5),ENSBGRG00000004626(CBLB),ENSBGRG00000005231(NIBAN2)…
BP	GO:0048102	autophagic cell death	4	7	ENSBGRG00000000764(CDKN1B),ENSBGRG00000005913(DAPK1),ENSBGRG00000006104(TP53INP1),ENSBGRG00000022099(LAPTM5)	0.00181158	0.097432		ko00640	Propanoate metabolism	Metabolism	Carbohydrate metabolism	3	30	ENSBGRG00000008277(ACSS1),ENSBGRG00000014792(ACACA),ENSBGRG00000018041(MLYCD)	0.486669	0.942455		CC	GO:0097574	lateral part of cell	2	9	0.00406138	0.1733	ENSBGRG00000001896(DENND4C),ENSBGRG00000024953(DENND4A)
BP	GO:0070508	cholesterol import	4	7	ENSBGRG00000003668(APOA1),ENSBGRG00000005861(LDLR),ENSBGRG00000008046(STARD5),ENSBGRG00000012214(SCARB1)	0.00181158	0.097432		ko00240	Pyrimidine metabolism	Metabolism	Nucleotide metabolism	5	53	ENSBGRG00000009124(RRM2B),ENSBGRG00000014307(NME7),ENSBGRG00000007650(DCTD),ENSBGRG00000016063(CTPS1),ENSBGRG00000001869(DTYMK)	0.488277	0.942455		BP	GO:0031175	neuron projection development	29	1556	0.00413537	0.135922	ENSBGRG00000001761(IFRD1),ENSBGRG00000002518(DDR2),ENSBGRG00000002824(USP33),ENSBGRG00000003783(SPTB),ENSBGRG00000003960(ENAH),ENSBGRG00000005231(NIBAN2),ENSBGRG00000006060(IGF1R),ENSBGRG00000007622(SMAD1),ENSBGRG00000008613(ENSBGRG00000008613),ENSBGRG00000009644(PPP1R9A),ENSBGRG00000010459(CDK19),ENSBGRG00000011253(EHMT1),ENSBGRG00000011372(BMP2K),ENSBGRG00000012099(LAMA2),ENSBGRG00000012463(RER…
BP	GO:0150079	negative regulation of neuroinflammatory response	4	7	ENSBGRG00000004407(TAFA3),ENSBGRG00000005861(LDLR),ENSBGRG00000008014(CST7),ENSBGRG00000020463(NR1D1)	0.00181158	0.097432		ko03008	Ribosome biogenesis in eukaryotes	Genetic Information Processing	Translation	7	76	ENSBGRG00000017777(DKC1),ENSBGRG00000022101(PWP2),ENSBGRG00000023529(LSG1),ENSBGRG00000022186(NXT2),ENSBGRG00000005503(REXO2),ENSBGRG00000019234(NAT10),ENSBGRG00000012277(RRP7A)	0.488498	0.942455		BP	GO:0044265	cellular macromolecule catabolic process	24	1207	0.00415495	0.135922	ENSBGRG00000000262(BOLL),ENSBGRG00000002321(FBXO42),ENSBGRG00000002824(USP33),ENSBGRG00000004626(CBLB),ENSBGRG00000005235(TENT2),ENSBGRG00000005984(CSNK1D),ENSBGRG00000007598(ZRANB1),ENSBGRG00000007714(RNF144B),ENSBGRG00000008227(UBR5),ENSBGRG00000009278(TMEM67),ENSBGRG00000009838(NUP214),ENSBGRG00000012799(FBXW8),ENSBGRG00000012856(UBE2D1),ENSBGRG00000013378(FEM1C),ENSBGRG00000018694(USP9X),ENSB…
BP	GO:2000846	regulation of corticosteroid hormone secretion	4	7	ENSBGRG00000008588(REN),ENSBGRG00000015409(CRY1),ENSBGRG00000019832(C1QTNF1),ENSBGRG00000023482(GALR1)	0.00181158	0.097432		ko05162	Measles	Human Diseases	Infectious disease: viral	12	134	ENSBGRG00000000764(CDKN1B),ENSBGRG00000016956(IL12B),ENSBGRG00000016285,ENSBGRG00000013560,ENSBGRG00000000131(IFNAR2),ENSBGRG00000007038(FASLG),ENSBGRG00000014066(MX1),ENSBGRG00000010723,ENSBGRG00000001789(STAT1),ENSBGRG00000010257(STAT3),ENSBGRG00000017283(FAS),ENSBGRG00000010846(STAT5A)	0.493214	0.942455		MF	GO:0016301	kinase activity	18	795	0.00423899	0.0802915	ENSBGRG00000002518(DDR2),ENSBGRG00000004461(LRRK1),ENSBGRG00000005383(DGKH),ENSBGRG00000005984(CSNK1D),ENSBGRG00000006051(CDC42BPA),ENSBGRG00000006060(IGF1R),ENSBGRG00000006248(PIKFYVE),ENSBGRG00000008463(TLK1),ENSBGRG00000009140(PRKCH),ENSBGRG00000010459(CDK19),ENSBGRG00000011372(BMP2K),ENSBGRG00000016159(NEK7),ENSBGRG00000020056(DLG1),ENSBGRG00000021365(PIK3C3),ENSBGRG00000022891(RAF1),ENSBGRG0…
MF	GO:0016773	phosphotransferase activity, alcohol group as acceptor	74	602	ENSBGRG00000000197(EPHA3),ENSBGRG00000000428(ATR),ENSBGRG00000000593(PRKAA2),ENSBGRG00000000918(STK36),ENSBGRG00000001150(PRKAG1),ENSBGRG00000001167(PRKACB),ENSBGRG00000001329(STK17B),ENSBGRG00000001473(GUCY2C),ENSBGRG00000001978(TGFBR3),ENSBGRG00000002568(MAP3K2),ENSBGRG00000004372(NTRK2),ENSBGRG00000004498(PFKP),ENSBGRG00000004732(AAK1),ENSBGRG00000004989(ACVR2A),ENSBGRG00000005369(FLT3),ENSBGR…	0.00181956	0.126243		ko04975	Fat digestion and absorption	Organismal Systems	Digestive system	4	42	ENSBGRG00000005175,ENSBGRG00000005071,ENSBGRG00000003668(APOA1),ENSBGRG00000012214(SCARB1)	0.497375	0.942455		BP	GO:0051049	regulation of transport	37	2143	0.0042474	0.13619	ENSBGRG00000000266(PROS1),ENSBGRG00000001141(ABCA1),ENSBGRG00000001728(ITPR2),ENSBGRG00000001896(DENND4C),ENSBGRG00000002944(TOMM70),ENSBGRG00000004274(RABGAP1L),ENSBGRG00000005379(ATG5),ENSBGRG00000005984(CSNK1D),ENSBGRG00000006060(IGF1R),ENSBGRG00000008227(UBR5),ENSBGRG00000009644(PPP1R9A),ENSBGRG00000009838(NUP214),ENSBGRG00000010412(ATP2A2),ENSBGRG00000011372(BMP2K),ENSBGRG00000012411(LRBA),E…
BP	GO:0071310	cellular response to organic substance	154	1376	ENSBGRG00000000061(GABPA),ENSBGRG00000000131(IFNAR2),ENSBGRG00000000197(EPHA3),ENSBGRG00000000213(NFE2L2),ENSBGRG00000000593(PRKAA2),ENSBGRG00000000673(ADCY6),ENSBGRG00000000764(CDKN1B),ENSBGRG00000000798(GABRG2),ENSBGRG00000000977(CERS1),ENSBGRG00000001078(WNT10B),ENSBGRG00000001451(CHMP5),ENSBGRG00000001452(TUBA1B),ENSBGRG00000001529(GRAMD1C),ENSBGRG00000001666(CASP6),ENSBGRG00000001756(NUGGC),…	0.00182477	0.097432		ko00220	Arginine biosynthesis	Metabolism	Amino acid metabolism	2	19	ENSBGRG00000011775(NOS1),ENSBGRG00000013000(NOS2)	0.497953	0.942455		BP	GO:0002666	positive regulation of T cell tolerance induction	2	9	0.00425016	0.13619	ENSBGRG00000004626(CBLB),ENSBGRG00000024593(TGFBR2)
BP	GO:0009887	animal organ morphogenesis	84	685	ENSBGRG00000000405(MFSD2A),ENSBGRG00000001078(WNT10B),ENSBGRG00000001621(AQP3),ENSBGRG00000001978(TGFBR3),ENSBGRG00000002134(CAV1),ENSBGRG00000002228(IGFBP5),ENSBGRG00000002594(GLI2),ENSBGRG00000002633(PPP3CA),ENSBGRG00000003766(HOXC13),ENSBGRG00000003786(MYF6),ENSBGRG00000003851(HS2ST1),ENSBGRG00000003951(AQP1),ENSBGRG00000004012(PAX9),ENSBGRG00000004042(OSR2),ENSBGRG00000004372(NTRK2),ENSBGRG00…	0.00185468	0.097496		ko04974	Protein digestion and absorption	Organismal Systems	Digestive system	9	100	ENSBGRG00000011584(ACE2),ENSBGRG00000005255(COL5A1),ENSBGRG00000022165(COL9A1),ENSBGRG00000007536(SLC6A19),ENSBGRG00000007748(XPNPEP2),ENSBGRG00000013466(COL1A2),ENSBGRG00000024054(COL22A1),ENSBGRG00000021026(COL4A6),ENSBGRG00000022615(SLC15A1)	0.500753	0.942455		BP	GO:1903053	regulation of extracellular matrix organization	4	59	0.00425998	0.13619	ENSBGRG00000001896(DENND4C),ENSBGRG00000002518(DDR2),ENSBGRG00000022578(CFLAR),ENSBGRG00000024953(DENND4A)
BP	GO:0001678	cellular glucose homeostasis	14	66	ENSBGRG00000000593(PRKAA2),ENSBGRG00000001895(ZBTB20),ENSBGRG00000002454(LRRC8D),ENSBGRG00000004306,ENSBGRG00000007178(SLC12A7),ENSBGRG00000007842(KLF7),ENSBGRG00000011880(MLXIPL),ENSBGRG00000011917(HK1),ENSBGRG00000013811(CDK16),ENSBGRG00000020463(NR1D1),ENSBGRG00000023500(NGFR),ENSBGRG00000023559(PRKACA),ENSBGRG00000023716(SIN3A),ENSBGRG00000025005(CCDC186)	0.0018612	0.097496		ko04061	Viral protein interaction with cytokine and cytokine receptor	Environmental Information Processing	Signaling molecules and interaction	7	77	ENSBGRG00000020676(CSF1R),ENSBGRG00000014317,ENSBGRG00000018824(CXCL12),ENSBGRG00000010021(CCL20),ENSBGRG00000015837(CXCL9),ENSBGRG00000012992,ENSBGRG00000016094(CCL28)	0.502643	0.942455		BP	GO:0045666	positive regulation of neuron differentiation	14	562	0.00430535	0.136606	ENSBGRG00000002518(DDR2),ENSBGRG00000005984(CSNK1D),ENSBGRG00000006060(IGF1R),ENSBGRG00000007622(SMAD1),ENSBGRG00000009644(PPP1R9A),ENSBGRG00000011253(EHMT1),ENSBGRG00000012799(FBXW8),ENSBGRG00000016288(MAGI2),ENSBGRG00000018952(TRAK1),ENSBGRG00000022578(CFLAR),ENSBGRG00000022891(RAF1),ENSBGRG00000024381(EEF2K),ENSBGRG00000024536(BMP5),ENSBGRG00000024679(PICALM)
BP	GO:0050999	regulation of nitric-oxide synthase activity	6	16	ENSBGRG00000002134(CAV1),ENSBGRG00000004989(ACVR2A),ENSBGRG00000007192(TERF2),ENSBGRG00000007850(TERT),ENSBGRG00000012214(SCARB1),ENSBGRG00000023249(LEP)	0.00187928	0.097496		ko05140	Leishmaniasis	Human Diseases	Infectious disease: parasitic	6	66	ENSBGRG00000016956(IL12B),ENSBGRG00000013000(NOS2),ENSBGRG00000018786(PTGS2),ENSBGRG00000009260,ENSBGRG00000022452,ENSBGRG00000001789(STAT1)	0.51141	0.946536		BP	GO:0006464	cellular protein modification process	62	4107	0.00437063	0.136623	ENSBGRG00000001141(ABCA1),ENSBGRG00000002518(DDR2),ENSBGRG00000002824(USP33),ENSBGRG00000003783(SPTB),ENSBGRG00000004461(LRRK1),ENSBGRG00000004626(CBLB),ENSBGRG00000005379(ATG5),ENSBGRG00000005459(PRDM5),ENSBGRG00000005984(CSNK1D),ENSBGRG00000006051(CDC42BPA),ENSBGRG00000006060(IGF1R),ENSBGRG00000007364(DENND2B),ENSBGRG00000007598(ZRANB1),ENSBGRG00000007622(SMAD1),ENSBGRG00000007714(RNF144B),ENSB…
BP	GO:0150077	regulation of neuroinflammatory response	6	16	ENSBGRG00000004407(TAFA3),ENSBGRG00000005861(LDLR),ENSBGRG00000008014(CST7),ENSBGRG00000018786(PTGS2),ENSBGRG00000019275(PLCG2),ENSBGRG00000020463(NR1D1)	0.00187928	0.097496		ko00750	Vitamin B6 metabolism	Metabolism	Metabolism of cofactors and vitamins	1	8	ENSBGRG00000015370(PSAT1)	0.514896	0.946536		BP	GO:0036211	protein modification process	62	4107	0.00437063	0.136623	ENSBGRG00000001141(ABCA1),ENSBGRG00000002518(DDR2),ENSBGRG00000002824(USP33),ENSBGRG00000003783(SPTB),ENSBGRG00000004461(LRRK1),ENSBGRG00000004626(CBLB),ENSBGRG00000005379(ATG5),ENSBGRG00000005459(PRDM5),ENSBGRG00000005984(CSNK1D),ENSBGRG00000006051(CDC42BPA),ENSBGRG00000006060(IGF1R),ENSBGRG00000007364(DENND2B),ENSBGRG00000007598(ZRANB1),ENSBGRG00000007622(SMAD1),ENSBGRG00000007714(RNF144B),ENSB…
CC	GO:0012505	endomembrane system	230	2164	ENSBGRG00000000197(EPHA3),ENSBGRG00000000203(DDOST),ENSBGRG00000000213(NFE2L2),ENSBGRG00000000428(ATR),ENSBGRG00000000593(PRKAA2),ENSBGRG00000000770(ECE1),ENSBGRG00000000909(FSTL4),ENSBGRG00000000977(CERS1),ENSBGRG00000001005(TECR),ENSBGRG00000001111(C9orf72),ENSBGRG00000001347(LMBR1L),ENSBGRG00000001451(CHMP5),ENSBGRG00000001479(ATP6V1A),ENSBGRG00000001516(CCDC25),ENSBGRG00000001529(GRAMD1C),ENS…	0.00187959	0.0945321		ko00740	Riboflavin metabolism	Metabolism	Metabolism of cofactors and vitamins	1	8	ENSBGRG00000019943(RFK)	0.514896	0.946536		MF	GO:0016773	phosphotransferase activity, alcohol group as acceptor	17	735	0.00439422	0.0808537	ENSBGRG00000002518(DDR2),ENSBGRG00000004461(LRRK1),ENSBGRG00000005383(DGKH),ENSBGRG00000005984(CSNK1D),ENSBGRG00000006051(CDC42BPA),ENSBGRG00000006060(IGF1R),ENSBGRG00000006248(PIKFYVE),ENSBGRG00000008463(TLK1),ENSBGRG00000009140(PRKCH),ENSBGRG00000010459(CDK19),ENSBGRG00000011372(BMP2K),ENSBGRG00000016159(NEK7),ENSBGRG00000021365(PIK3C3),ENSBGRG00000022891(RAF1),ENSBGRG00000024381(EEF2K),ENSBGRG…
BP	GO:0048699	generation of neurons	107	909	ENSBGRG00000000197(EPHA3),ENSBGRG00000000405(MFSD2A),ENSBGRG00000000520(DPYSL2),ENSBGRG00000000682(CECR2),ENSBGRG00000000770(ECE1),ENSBGRG00000000909(FSTL4),ENSBGRG00000001070(ATXN10),ENSBGRG00000001111(C9orf72),ENSBGRG00000001761(IFRD1),ENSBGRG00000001923(GAP43),ENSBGRG00000002486(XRCC5),ENSBGRG00000002594(GLI2),ENSBGRG00000002633(PPP3CA),ENSBGRG00000003262(TMEM106B),ENSBGRG00000003498(VWC2L),EN…	0.00190857	0.0983182		ko04961	Endocrine and other factor-regulated calcium reabsorption	Organismal Systems	Excretory system	4	43	ENSBGRG00000000673(ADCY6),ENSBGRG00000001167(PRKACB),ENSBGRG00000023559(PRKACA),ENSBGRG00000021305(CLTC)	0.516292	0.946536		CC	GO:0016460	myosin II complex	3	31	0.00459958	0.1733	ENSBGRG00000004749(MYL1),ENSBGRG00000007922(MYH6),ENSBGRG00000008351(MYH7)
BP	GO:0043631	RNA polyadenylation	8	27	ENSBGRG00000002429(AHCYL1),ENSBGRG00000003804(CDC73),ENSBGRG00000006713(PAPOLG),ENSBGRG00000009794(TENT4A),ENSBGRG00000009967(TENT4B),ENSBGRG00000012297,ENSBGRG00000014538(PABPC1L),ENSBGRG00000019603(SYMPK)	0.00193747	0.0991091		ko05418	Fluid shear stress and atherosclerosis	Human Diseases	Cardiovascular disease	11	125	ENSBGRG00000022014,ENSBGRG00000023016(MAPK7),ENSBGRG00000000213(NFE2L2),ENSBGRG00000003295(MGST3),ENSBGRG00000002079,ENSBGRG00000002112(GSTM3),ENSBGRG00000004989(ACVR2A),ENSBGRG00000000593(PRKAA2),ENSBGRG00000002134(CAV1),ENSBGRG00000017354(BMPR2),ENSBGRG00000005672(SRC)	0.521452	0.947086		BP	GO:0040024	dauer larval development	5	97	0.00464741	0.144206	ENSBGRG00000006060(IGF1R),ENSBGRG00000009140(PRKCH),ENSBGRG00000010412(ATP2A2),ENSBGRG00000015942(EBF1),ENSBGRG00000022197(FBXL2)
BP	GO:0043281	regulation of cysteine-type endopeptidase activity involved in apoptotic process	21	119	ENSBGRG00000000221(F3),ENSBGRG00000003405(NOD1),ENSBGRG00000003951(AQP1),ENSBGRG00000005464(USP47),ENSBGRG00000005672(SRC),ENSBGRG00000005913(DAPK1),ENSBGRG00000007038(FASLG),ENSBGRG00000009029(EGLN3),ENSBGRG00000009451(HIP1),ENSBGRG00000010161(MTCH1),ENSBGRG00000015017(SH3RF1),ENSBGRG00000016600(PDCD5),ENSBGRG00000017283(FAS),ENSBGRG00000018786(PTGS2),ENSBGRG00000019027(ATP2A3),ENSBGRG0000001977…	0.00197048	0.100097		ko00100	Steroid biosynthesis	Metabolism	Lipid metabolism	2	20	ENSBGRG00000002753(FDFT1),ENSBGRG00000018809(EBP)	0.525883	0.947086		BP	GO:0007009	plasma membrane organization	5	98	0.00485387	0.149513	ENSBGRG00000003783(SPTB),ENSBGRG00000008613(ENSBGRG00000008613),ENSBGRG00000010412(ATP2A2),ENSBGRG00000015284(SPTBN1),ENSBGRG00000021443(ANO6)
BP	GO:0006793	phosphorus metabolic process	227	2129	ENSBGRG00000000197(EPHA3),ENSBGRG00000000405(MFSD2A),ENSBGRG00000000428(ATR),ENSBGRG00000000593(PRKAA2),ENSBGRG00000000673(ADCY6),ENSBGRG00000000764(CDKN1B),ENSBGRG00000000918(STK36),ENSBGRG00000001111(C9orf72),ENSBGRG00000001150(PRKAG1),ENSBGRG00000001167(PRKACB),ENSBGRG00000001329(STK17B),ENSBGRG00000001422(RPAP2),ENSBGRG00000001473(GUCY2C),ENSBGRG00000001845(KAT2B),ENSBGRG00000001869(DTYMK),EN…	0.00205108	0.103473		ko04926	Relaxin signaling pathway	Organismal Systems	Endocrine system	10	114	ENSBGRG00000021026(COL4A6),ENSBGRG00000010905(VEGFD),ENSBGRG00000013000(NOS2),ENSBGRG00000011775(NOS1),ENSBGRG00000013466(COL1A2),ENSBGRG00000000673(ADCY6),ENSBGRG00000001167(PRKACB),ENSBGRG00000023559(PRKACA),ENSBGRG00000005168,ENSBGRG00000005672(SRC)	0.529032	0.947086		CC	GO:0043229	intracellular organelle	140	11450	0.00486719	0.1733	ENSBGRG00000000139(SON),ENSBGRG00000000262(BOLL),ENSBGRG00000000266(PROS1),ENSBGRG00000000599(ENSBGRG00000000599),ENSBGRG00000000629(GNPTAB),ENSBGRG00000000973(FGD6),ENSBGRG00000001023(TBXAS1),ENSBGRG00000001141(ABCA1),ENSBGRG00000001484(SEC24B),ENSBGRG00000001728(ITPR2),ENSBGRG00000001761(IFRD1),ENSBGRG00000001896(DENND4C),ENSBGRG00000002158(HMBOX1),ENSBGRG00000002518(DDR2),ENSBGRG00000002693(AP…
BP	GO:0120035	regulation of plasma membrane bounded cell projection organization	50	369	ENSBGRG00000000197(EPHA3),ENSBGRG00000000405(MFSD2A),ENSBGRG00000000520(DPYSL2),ENSBGRG00000000909(FSTL4),ENSBGRG00000001761(IFRD1),ENSBGRG00000001923(GAP43),ENSBGRG00000002134(CAV1),ENSBGRG00000002633(PPP3CA),ENSBGRG00000003534(ACTR3),ENSBGRG00000004203(SEMA7A),ENSBGRG00000004372(NTRK2),ENSBGRG00000004553(CSMD3),ENSBGRG00000005094(NEGR1),ENSBGRG00000005442(CYFIP1),ENSBGRG00000005672(SRC),ENSBGRG…	0.00208768	0.104598		ko05032	Morphine addiction	Human Diseases	Substance dependence	7	79	ENSBGRG00000000288(PDE11A),ENSBGRG00000023559(PRKACA),ENSBGRG00000001167(PRKACB),ENSBGRG00000000673(ADCY6),ENSBGRG00000007869(KCNJ3),ENSBGRG00000013724(GRK4),ENSBGRG00000000798(GABRG2)	0.53053	0.947086		BP	GO:0051591	response to cAMP	6	140	0.0049022	0.149892	ENSBGRG00000000599(ENSBGRG00000000599),ENSBGRG00000001728(ITPR2),ENSBGRG00000013584(NOX4),ENSBGRG00000014876(ATP7B),ENSBGRG00000015028(DUSP1),ENSBGRG00000024381(EEF2K)
BP	GO:0022008	neurogenesis	114	981	ENSBGRG00000000197(EPHA3),ENSBGRG00000000405(MFSD2A),ENSBGRG00000000520(DPYSL2),ENSBGRG00000000682(CECR2),ENSBGRG00000000770(ECE1),ENSBGRG00000000909(FSTL4),ENSBGRG00000001070(ATXN10),ENSBGRG00000001111(C9orf72),ENSBGRG00000001761(IFRD1),ENSBGRG00000001923(GAP43),ENSBGRG00000002486(XRCC5),ENSBGRG00000002594(GLI2),ENSBGRG00000002633(PPP3CA),ENSBGRG00000003262(TMEM106B),ENSBGRG00000003498(VWC2L),EN…	0.00212794	0.10589		ko03030	DNA replication	Genetic Information Processing	Replication and repair	3	32	ENSBGRG00000024546,ENSBGRG00000010710(RFC5),ENSBGRG00000003610(RFC1)	0.530942	0.947086		BP	GO:0007528	neuromuscular junction development	9	286	0.00493721	0.149892	ENSBGRG00000003960(ENAH),ENSBGRG00000006060(IGF1R),ENSBGRG00000008613(ENSBGRG00000008613),ENSBGRG00000012411(LRBA),ENSBGRG00000015284(SPTBN1),ENSBGRG00000016568(ACSL3),ENSBGRG00000016974(NBEA),ENSBGRG00000021677(SYNCRIP),ENSBGRG00000024536(BMP5)
MF	GO:0004674	protein serine/threonine kinase activity	38	268	ENSBGRG00000000428(ATR),ENSBGRG00000000593(PRKAA2),ENSBGRG00000000918(STK36),ENSBGRG00000001167(PRKACB),ENSBGRG00000001329(STK17B),ENSBGRG00000001978(TGFBR3),ENSBGRG00000004989(ACVR2A),ENSBGRG00000005913(DAPK1),ENSBGRG00000005984(CSNK1D),ENSBGRG00000006051(CDC42BPA),ENSBGRG00000009042(RIPK1),ENSBGRG00000009467(CSNK1G3),ENSBGRG00000010569(STK17A),ENSBGRG00000010942(PRKAB2),ENSBGRG00000011285(PAK5)…	0.00215639	0.142812		ko05212	Pancreatic cancer	Human Diseases	Cancer: specific types	6	68	ENSBGRG00000024537(SMAD4),ENSBGRG00000020100(RB1),ENSBGRG00000001789(STAT1),ENSBGRG00000010257(STAT3),ENSBGRG00000024943,ENSBGRG00000016285	0.541382	0.960516		CC	GO:0031094	platelet dense tubular network	2	10	0.0050404	0.1733	ENSBGRG00000001728(ITPR2),ENSBGRG00000010412(ATP2A2)
MF	GO:0004652	polynucleotide adenylyltransferase activity	5	12	ENSBGRG00000003767(TENT5A),ENSBGRG00000006713(PAPOLG),ENSBGRG00000009794(TENT4A),ENSBGRG00000009967(TENT4B),ENSBGRG00000012297	0.00242628	0.143747		ko05014	Amyotrophic lateral sclerosis	Human Diseases	Neurodegenerative disease	29	338	ENSBGRG00000012730(NDUFA8),ENSBGRG00000018062(DNAH5),ENSBGRG00000016285,ENSBGRG00000001452(TUBA1B),ENSBGRG00000026044(ANXA11),ENSBGRG00000001004(VDAC1),ENSBGRG00000013000(NOS2),ENSBGRG00000006363(WDR41),ENSBGRG00000008576,ENSBGRG00000010730(NDUFA6),ENSBGRG00000015635(PSMD14),ENSBGRG00000015642(PRKN),ENSBGRG00000020026(HSPA5),ENSBGRG00000003435,ENSBGRG00000021365(PIK3C3),ENSBGRG00000021126(PSMC4),…	0.546104	0.961371		BP	GO:1905477	positive regulation of protein localization to membrane	6	141	0.00507373	0.152434	ENSBGRG00000001896(DENND4C),ENSBGRG00000009140(PRKCH),ENSBGRG00000015284(SPTBN1),ENSBGRG00000016568(ACSL3),ENSBGRG00000020056(DLG1),ENSBGRG00000024953(DENND4A)
BP	GO:0031344	regulation of cell projection organization	50	372	ENSBGRG00000000197(EPHA3),ENSBGRG00000000405(MFSD2A),ENSBGRG00000000520(DPYSL2),ENSBGRG00000000909(FSTL4),ENSBGRG00000001761(IFRD1),ENSBGRG00000001923(GAP43),ENSBGRG00000002134(CAV1),ENSBGRG00000002633(PPP3CA),ENSBGRG00000003534(ACTR3),ENSBGRG00000004203(SEMA7A),ENSBGRG00000004372(NTRK2),ENSBGRG00000004553(CSMD3),ENSBGRG00000005094(NEGR1),ENSBGRG00000005442(CYFIP1),ENSBGRG00000005672(SRC),ENSBGRG…	0.00247315	0.122135		ko00250	Alanine, aspartate and glutamate metabolism	Metabolism	Amino acid metabolism	3	33	ENSBGRG00000010296(RIMKLB),ENSBGRG00000003404(ALDH4A1),ENSBGRG00000004514(GFPT1)	0.55226	0.961371		BP	GO:0032990	cell part morphogenesis	24	1228	0.00514613	0.152434	ENSBGRG00000001761(IFRD1),ENSBGRG00000002518(DDR2),ENSBGRG00000002824(USP33),ENSBGRG00000003783(SPTB),ENSBGRG00000003960(ENAH),ENSBGRG00000005231(NIBAN2),ENSBGRG00000006060(IGF1R),ENSBGRG00000007622(SMAD1),ENSBGRG00000009644(PPP1R9A),ENSBGRG00000010459(CDK19),ENSBGRG00000011253(EHMT1),ENSBGRG00000011372(BMP2K),ENSBGRG00000012099(LAMA2),ENSBGRG00000012463(RERE),ENSBGRG00000012799(FBXW8),ENSBGRG000…
BP	GO:0043067	regulation of programmed cell death	111	956	ENSBGRG00000000213(NFE2L2),ENSBGRG00000000221(F3),ENSBGRG00000000593(PRKAA2),ENSBGRG00000000764(CDKN1B),ENSBGRG00000000766(TRIM35),ENSBGRG00000000962(MCL1),ENSBGRG00000001004(VDAC1),ENSBGRG00000001078(WNT10B),ENSBGRG00000001329(STK17B),ENSBGRG00000001666(CASP6),ENSBGRG00000001756(NUGGC),ENSBGRG00000001892(ING5),ENSBGRG00000002134(CAV1),ENSBGRG00000002594(GLI2),ENSBGRG00000002683(IL13),ENSBGRG0000…	0.00249683	0.122135		ko04977	Vitamin digestion and absorption	Organismal Systems	Digestive system	2	21	ENSBGRG00000003668(APOA1),ENSBGRG00000012214(SCARB1)	0.552743	0.961371		BP	GO:1901888	regulation of cell junction assembly	10	342	0.00518526	0.152434	ENSBGRG00000003960(ENAH),ENSBGRG00000006060(IGF1R),ENSBGRG00000008613(ENSBGRG00000008613),ENSBGRG00000009140(PRKCH),ENSBGRG00000009644(PPP1R9A),ENSBGRG00000015284(SPTBN1),ENSBGRG00000016568(ACSL3),ENSBGRG00000021677(SYNCRIP),ENSBGRG00000024381(EEF2K),ENSBGRG00000024536(BMP5)
BP	GO:0071704	organic substance metabolic process	753	7873	ENSBGRG00000000004(VGLL3),ENSBGRG00000000061(GABPA),ENSBGRG00000000074(N6AMT1),ENSBGRG00000000197(EPHA3),ENSBGRG00000000203(DDOST),ENSBGRG00000000213(NFE2L2),ENSBGRG00000000215(PLCL2),ENSBGRG00000000221(F3),ENSBGRG00000000235,ENSBGRG00000000237(AGPS),ENSBGRG00000000283(HP1BP3),ENSBGRG00000000285(CIART),ENSBGRG00000000351(EEPD1),ENSBGRG00000000405(MFSD2A),ENSBGRG00000000428(ATR),ENSBGRG00000000440…	0.00250448	0.122135		ko05220	Chronic myeloid leukemia	Human Diseases	Cancer: specific types	6	69	ENSBGRG00000005168,ENSBGRG00000024537(SMAD4),ENSBGRG00000010846(STAT5A),ENSBGRG00000020100(RB1),ENSBGRG00000016285,ENSBGRG00000000764(CDKN1B)	0.556066	0.961371		BP	GO:0007502	digestive tract mesoderm development	2	10	0.00527378	0.152434	ENSBGRG00000012099(LAMA2),ENSBGRG00000024536(BMP5)
MF	GO:0003720	telomerase activity	3	4	ENSBGRG00000007192(TERF2),ENSBGRG00000007850(TERT),ENSBGRG00000017777(DKC1)	0.00252561	0.143747		ko04658	Th1 and Th2 cell differentiation	Organismal Systems	Immune system	8	93	ENSBGRG00000002683(IL13),ENSBGRG00000016956(IL12B),ENSBGRG00000006002(JAG2),ENSBGRG00000011453,ENSBGRG00000001789(STAT1),ENSBGRG00000022452,ENSBGRG00000002633(PPP3CA),ENSBGRG00000010846(STAT5A)	0.559566	0.961371		BP	GO:0014819	regulation of skeletal muscle contraction	2	10	0.00527378	0.152434	ENSBGRG00000007922(MYH6),ENSBGRG00000008351(MYH7)
BP	GO:0048666	neuron development	78	635	ENSBGRG00000000197(EPHA3),ENSBGRG00000000405(MFSD2A),ENSBGRG00000000520(DPYSL2),ENSBGRG00000000682(CECR2),ENSBGRG00000000770(ECE1),ENSBGRG00000000909(FSTL4),ENSBGRG00000001070(ATXN10),ENSBGRG00000001111(C9orf72),ENSBGRG00000001761(IFRD1),ENSBGRG00000001923(GAP43),ENSBGRG00000002594(GLI2),ENSBGRG00000002633(PPP3CA),ENSBGRG00000003262(TMEM106B),ENSBGRG00000003613(PBX3),ENSBGRG00000004157(UGT8),ENSB…	0.00254214	0.122345		ko05167	Kaposi sarcoma-associated herpesvirus infection	Human Diseases	Infectious disease: viral	14	164	ENSBGRG00000007268(PIK3CG),ENSBGRG00000021365(PIK3C3),ENSBGRG00000026668(PIK3R6),ENSBGRG00000000131(IFNAR2),ENSBGRG00000018786(PTGS2),ENSBGRG00000005672(SRC),ENSBGRG00000002633(PPP3CA),ENSBGRG00000001789(STAT1),ENSBGRG00000020100(RB1),ENSBGRG00000010536(FGF2),ENSBGRG00000010257(STAT3),ENSBGRG00000019275(PLCG2),ENSBGRG00000016090(MAPKAPK2),ENSBGRG00000017283(FAS)	0.560603	0.961371		BP	GO:0051838	cytolysis by host of symbiont cells	2	10	0.00527378	0.152434	ENSBGRG00000019951(CATHL6),ENSBGRG00000020321(ENSBGRG00000020321)
MF	GO:0003677	DNA binding	158	1459	ENSBGRG00000000061(GABPA),ENSBGRG00000000213(NFE2L2),ENSBGRG00000000235,ENSBGRG00000000283(HP1BP3),ENSBGRG00000000285(CIART),ENSBGRG00000000351(EEPD1),ENSBGRG00000000461(NR4A3),ENSBGRG00000000867(IKZF4),ENSBGRG00000001195(SP8),ENSBGRG00000001424(LONP1),ENSBGRG00000001485(NFX1),ENSBGRG00000001516(CCDC25),ENSBGRG00000001789(STAT1),ENSBGRG00000001845(KAT2B),ENSBGRG00000001895(ZBTB20),ENSBGRG00000001…	0.00254234	0.143747		ko04072	Phospholipase D signaling pathway	Environmental Information Processing	Signal transduction	11	129	ENSBGRG00000025775(CYTH3),ENSBGRG00000000673(ADCY6),ENSBGRG00000019275(PLCG2),ENSBGRG00000009260,ENSBGRG00000007268(PIK3CG),ENSBGRG00000002227(LPAR2),ENSBGRG00000006329(CYTH4),ENSBGRG00000005168,ENSBGRG00000025554(DGKK),ENSBGRG00000026668(PIK3R6),ENSBGRG00000021211	0.56491	0.961371		BP	GO:0110011	regulation of basement membrane organization	2	10	0.00527378	0.152434	ENSBGRG00000001896(DENND4C),ENSBGRG00000024953(DENND4A)
MF	GO:0001228	DNA-binding transcription activator activity, RNA polymerase II-specific	43	316	ENSBGRG00000000061(GABPA),ENSBGRG00000000213(NFE2L2),ENSBGRG00000000461(NR4A3),ENSBGRG00000001954(ZNF395),ENSBGRG00000002070(GLIS1),ENSBGRG00000002337(ETV5),ENSBGRG00000002594(GLI2),ENSBGRG00000003613(PBX3),ENSBGRG00000003766(HOXC13),ENSBGRG00000003786(MYF6),ENSBGRG00000004012(PAX9),ENSBGRG00000004042(OSR2),ENSBGRG00000004899(DLX3),ENSBGRG00000005329(OTX2),ENSBGRG00000005831(KLF5),ENSBGRG00000007…	0.00256515	0.143747		ko05217	Basal cell carcinoma	Human Diseases	Cancer: specific types	5	58	ENSBGRG00000012559(DVL1),ENSBGRG00000007688(FZD6),ENSBGRG00000019557(WNT5B),ENSBGRG00000002594(GLI2),ENSBGRG00000001078(WNT10B)	0.570339	0.961371		CC	GO:0043226	organelle	142	11674	0.00531464	0.1733	ENSBGRG00000000139(SON),ENSBGRG00000000262(BOLL),ENSBGRG00000000266(PROS1),ENSBGRG00000000599(ENSBGRG00000000599),ENSBGRG00000000629(GNPTAB),ENSBGRG00000000973(FGD6),ENSBGRG00000001023(TBXAS1),ENSBGRG00000001141(ABCA1),ENSBGRG00000001484(SEC24B),ENSBGRG00000001728(ITPR2),ENSBGRG00000001761(IFRD1),ENSBGRG00000001896(DENND4C),ENSBGRG00000002158(HMBOX1),ENSBGRG00000002518(DDR2),ENSBGRG00000002693(AP…
BP	GO:0044238	primary metabolic process	709	7379	ENSBGRG00000000004(VGLL3),ENSBGRG00000000061(GABPA),ENSBGRG00000000074(N6AMT1),ENSBGRG00000000197(EPHA3),ENSBGRG00000000203(DDOST),ENSBGRG00000000213(NFE2L2),ENSBGRG00000000215(PLCL2),ENSBGRG00000000221(F3),ENSBGRG00000000235,ENSBGRG00000000237(AGPS),ENSBGRG00000000283(HP1BP3),ENSBGRG00000000285(CIART),ENSBGRG00000000351(EEPD1),ENSBGRG00000000405(MFSD2A),ENSBGRG00000000428(ATR),ENSBGRG00000000440…	0.00258681	0.122345		ko00380	Tryptophan metabolism	Metabolism	Amino acid metabolism	4	46	ENSBGRG00000006801(HADH),ENSBGRG00000020920,ENSBGRG00000013578,ENSBGRG00000004794(TDO2)	0.570918	0.961371		BP	GO:0002790	peptide secretion	17	766	0.00548989	0.157601	ENSBGRG00000000629(GNPTAB),ENSBGRG00000001141(ABCA1),ENSBGRG00000001728(ITPR2),ENSBGRG00000001896(DENND4C),ENSBGRG00000005379(ATG5),ENSBGRG00000008227(UBR5),ENSBGRG00000008434(UBE2Q1),ENSBGRG00000015284(SPTBN1),ENSBGRG00000019951(CATHL6),ENSBGRG00000020321(ENSBGRG00000020321),ENSBGRG00000021132(VMP1),ENSBGRG00000021365(PIK3C3),ENSBGRG00000022891(RAF1),ENSBGRG00000024593(TGFBR2),ENSBGRG00000024953…
BP	GO:0009890	negative regulation of biosynthetic process	113	977	ENSBGRG00000000061(GABPA),ENSBGRG00000000285(CIART),ENSBGRG00000000428(ATR),ENSBGRG00000000764(CDKN1B),ENSBGRG00000000867(IKZF4),ENSBGRG00000000920(ZRANB3),ENSBGRG00000000977(CERS1),ENSBGRG00000001078(WNT10B),ENSBGRG00000001485(NFX1),ENSBGRG00000001895(ZBTB20),ENSBGRG00000001901(FOXP2),ENSBGRG00000002070(GLIS1),ENSBGRG00000002134(CAV1),ENSBGRG00000002228(IGFBP5),ENSBGRG00000002337(ETV5),ENSBGRG00…	0.00260271	0.122345		ko04745	Phototransduction - fly	Organismal Systems	Sensory system	2	22	ENSBGRG00000025849(DAGLB),ENSBGRG00000021420(CAMK2A)	0.578509	0.961371		MF	GO:0042800	histone methyltransferase activity (H3-K4 specific)	2	10	0.0054957	0.098312	ENSBGRG00000016971(NSD3),ENSBGRG00000019016(SETD3)
BP	GO:0035929	steroid hormone secretion	5	12	ENSBGRG00000008588(REN),ENSBGRG00000015409(CRY1),ENSBGRG00000019832(C1QTNF1),ENSBGRG00000023482(GALR1),ENSBGRG00000025055(SELENOM)	0.00267443	0.122345		ko00592	alpha-Linolenic acid metabolism	Metabolism	Lipid metabolism	2	22	ENSBGRG00000005175,ENSBGRG00000005071	0.578509	0.961371		BP	GO:0032880	regulation of protein localization	24	1238	0.00568355	0.161336	ENSBGRG00000001728(ITPR2),ENSBGRG00000001896(DENND4C),ENSBGRG00000002944(TOMM70),ENSBGRG00000004274(RABGAP1L),ENSBGRG00000005379(ATG5),ENSBGRG00000005984(CSNK1D),ENSBGRG00000006060(IGF1R),ENSBGRG00000008227(UBR5),ENSBGRG00000009140(PRKCH),ENSBGRG00000009838(NUP214),ENSBGRG00000011855(ATP8B1),ENSBGRG00000012550(ATP8B4),ENSBGRG00000015284(SPTBN1),ENSBGRG00000016288(MAGI2),ENSBGRG00000016568(ACSL3),…
BP	GO:0048268	clathrin coat assembly	5	12	ENSBGRG00000009451(HIP1),ENSBGRG00000012654(NSG2),ENSBGRG00000015939(CALY),ENSBGRG00000021305(CLTC),ENSBGRG00000024679(PICALM)	0.00267443	0.122345		ko04614	Renin-angiotensin system	Organismal Systems	Endocrine system	2	22	ENSBGRG00000011584(ACE2),ENSBGRG00000008588(REN)	0.578509	0.961371		BP	GO:0061951	establishment of protein localization to plasma membrane	4	64	0.00569648	0.161336	ENSBGRG00000001896(DENND4C),ENSBGRG00000015284(SPTBN1),ENSBGRG00000016568(ACSL3),ENSBGRG00000024953(DENND4A)
BP	GO:0070102	interleukin-6-mediated signaling pathway	5	12	ENSBGRG00000005672(SRC),ENSBGRG00000009042(RIPK1),ENSBGRG00000010257(STAT3),ENSBGRG00000020545(FER),ENSBGRG00000024537(SMAD4)	0.00267443	0.122345		ko05012	Parkinson disease	Human Diseases	Neurodegenerative disease	20	237	ENSBGRG00000021420(CAMK2A),ENSBGRG00000024995,ENSBGRG00000026030(TUBB4A),ENSBGRG00000023559(PRKACA),ENSBGRG00000001167(PRKACB),ENSBGRG00000026485(SLC39A11),ENSBGRG00000010730(NDUFA6),ENSBGRG00000015635(PSMD14),ENSBGRG00000020026(HSPA5),ENSBGRG00000001004(VDAC1),ENSBGRG00000008576,ENSBGRG00000021126(PSMC4),ENSBGRG00000015642(PRKN),ENSBGRG00000013578,ENSBGRG00000019173(SLC18A2),ENSBGRG00000012730(N…	0.579736	0.961371		BP	GO:0000904	cell morphogenesis involved in differentiation	25	1309	0.0057554	0.161918	ENSBGRG00000001761(IFRD1),ENSBGRG00000002518(DDR2),ENSBGRG00000002824(USP33),ENSBGRG00000003783(SPTB),ENSBGRG00000003960(ENAH),ENSBGRG00000005231(NIBAN2),ENSBGRG00000006060(IGF1R),ENSBGRG00000007622(SMAD1),ENSBGRG00000008613(ENSBGRG00000008613),ENSBGRG00000009644(PPP1R9A),ENSBGRG00000010459(CDK19),ENSBGRG00000011253(EHMT1),ENSBGRG00000011372(BMP2K),ENSBGRG00000012099(LAMA2),ENSBGRG00000012463(RER…
BP	GO:1904385	cellular response to angiotensin	5	12	ENSBGRG00000002134(CAV1),ENSBGRG00000002429(AHCYL1),ENSBGRG00000005672(SRC),ENSBGRG00000020777(ACTN2),ENSBGRG00000021420(CAMK2A)	0.00267443	0.122345		ko04214	Apoptosis - fly	Cellular Processes	Cell growth and death	4	47	ENSBGRG00000014113(ATM),ENSBGRG00000008322(PRDX4),ENSBGRG00000005223(PARP1),ENSBGRG00000000428(ATR)	0.588345	0.969893		CC	GO:0048471	perinuclear region of cytoplasm	17	789	0.00581528	0.1733	ENSBGRG00000000599(ENSBGRG00000000599),ENSBGRG00000001141(ABCA1),ENSBGRG00000002824(USP33),ENSBGRG00000005984(CSNK1D),ENSBGRG00000006248(PIKFYVE),ENSBGRG00000008227(UBR5),ENSBGRG00000009072(SLC30A7),ENSBGRG00000010412(ATP2A2),ENSBGRG00000012411(LRBA),ENSBGRG00000012799(FBXW8),ENSBGRG00000013584(NOX4),ENSBGRG00000014876(ATP7B),ENSBGRG00000016288(MAGI2),ENSBGRG00000016568(ACSL3),ENSBGRG00000016974(…
BP	GO:1990776	response to angiotensin	5	12	ENSBGRG00000002134(CAV1),ENSBGRG00000002429(AHCYL1),ENSBGRG00000005672(SRC),ENSBGRG00000020777(ACTN2),ENSBGRG00000021420(CAMK2A)	0.00267443	0.122345		ko04070	Phosphatidylinositol signaling system	Environmental Information Processing	Signal transduction	7	84	ENSBGRG00000008560(MTMR14),ENSBGRG00000019275(PLCG2),ENSBGRG00000021365(PIK3C3),ENSBGRG00000018890(PI4K2A),ENSBGRG00000025554(DGKK),ENSBGRG00000013464(PLCD1),ENSBGRG00000014718(PIP4K2B)	0.597304	0.969893		BP	GO:0051223	regulation of protein transport	18	836	0.00585979	0.1627	ENSBGRG00000001728(ITPR2),ENSBGRG00000001896(DENND4C),ENSBGRG00000002944(TOMM70),ENSBGRG00000005379(ATG5),ENSBGRG00000005984(CSNK1D),ENSBGRG00000006060(IGF1R),ENSBGRG00000008227(UBR5),ENSBGRG00000009838(NUP214),ENSBGRG00000015284(SPTBN1),ENSBGRG00000016568(ACSL3),ENSBGRG00000019951(CATHL6),ENSBGRG00000020321(ENSBGRG00000020321),ENSBGRG00000021365(PIK3C3),ENSBGRG00000024593(TGFBR2),ENSBGRG00000024…
BP	GO:0089709	L-histidine transmembrane transport	3	4	ENSBGRG00000006751(SLC7A1),ENSBGRG00000010376(SLC15A4),ENSBGRG00000017235(SLC38A5)	0.00269275	0.122345		ko05152	Tuberculosis	Human Diseases	Infectious disease: bacterial	13	156	ENSBGRG00000021365(PIK3C3),ENSBGRG00000005672(SRC),ENSBGRG00000009889(ATP6V0A1),ENSBGRG00000001789(STAT1),ENSBGRG00000002633(PPP3CA),ENSBGRG00000022452,ENSBGRG00000021420(CAMK2A),ENSBGRG00000009260,ENSBGRG00000013027(RAB7A),ENSBGRG00000013000(NOS2),ENSBGRG00000006318,ENSBGRG00000016956(IL12B),ENSBGRG00000019776(CLEC7A)	0.597392	0.969893		BP	GO:0002026	regulation of the force of heart contraction	3	33	0.00586028	0.1627	ENSBGRG00000007922(MYH6),ENSBGRG00000008351(MYH7),ENSBGRG00000010412(ATP2A2)
BP	GO:1904760	regulation of myofibroblast differentiation	3	4	ENSBGRG00000006104(TP53INP1),ENSBGRG00000017884(PDCD4),ENSBGRG00000020100(RB1)	0.00269275	0.122345		ko05221	Acute myeloid leukemia	Human Diseases	Cancer: specific types	5	60	ENSBGRG00000020676(CSF1R),ENSBGRG00000005369(FLT3),ENSBGRG00000010257(STAT3),ENSBGRG00000010846(STAT5A),ENSBGRG00000010331(RUNX1T1)	0.601201	0.969893		CC	GO:0005794	Golgi apparatus	26	1417	0.00598717	0.1733	ENSBGRG00000000266(PROS1),ENSBGRG00000000629(GNPTAB),ENSBGRG00000000973(FGD6),ENSBGRG00000001141(ABCA1),ENSBGRG00000001896(DENND4C),ENSBGRG00000002824(USP33),ENSBGRG00000003783(SPTB),ENSBGRG00000004086(DENND5B),ENSBGRG00000004274(RABGAP1L),ENSBGRG00000004575(SERINC5),ENSBGRG00000005984(CSNK1D),ENSBGRG00000006248(PIKFYVE),ENSBGRG00000008391(PRRC1),ENSBGRG00000009072(SLC30A7),ENSBGRG00000009216(BRW…
BP	GO:1904761	negative regulation of myofibroblast differentiation	3	4	ENSBGRG00000006104(TP53INP1),ENSBGRG00000017884(PDCD4),ENSBGRG00000020100(RB1)	0.00269275	0.122345		ko04611	Platelet activation	Organismal Systems	Immune system	8	97	ENSBGRG00000007268(PIK3CG),ENSBGRG00000026668(PIK3R6),ENSBGRG00000019275(PLCG2),ENSBGRG00000005672(SRC),ENSBGRG00000000673(ADCY6),ENSBGRG00000013466(COL1A2),ENSBGRG00000023559(PRKACA),ENSBGRG00000001167(PRKACB)	0.608507	0.969893		BP	GO:0051239	regulation of multicellular organismal process	58	3836	0.00600556	0.164909	ENSBGRG00000000266(PROS1),ENSBGRG00000001023(TBXAS1),ENSBGRG00000001141(ABCA1),ENSBGRG00000001728(ITPR2),ENSBGRG00000001761(IFRD1),ENSBGRG00000002518(DDR2),ENSBGRG00000002944(TOMM70),ENSBGRG00000003960(ENAH),ENSBGRG00000004626(CBLB),ENSBGRG00000005231(NIBAN2),ENSBGRG00000005379(ATG5),ENSBGRG00000005984(CSNK1D),ENSBGRG00000006060(IGF1R),ENSBGRG00000007622(SMAD1),ENSBGRG00000007922(MYH6),ENSBGRG000…
BP	GO:0034654	nucleobase-containing compound biosynthetic process	279	2687	ENSBGRG00000000004(VGLL3),ENSBGRG00000000061(GABPA),ENSBGRG00000000213(NFE2L2),ENSBGRG00000000235,ENSBGRG00000000283(HP1BP3),ENSBGRG00000000285(CIART),ENSBGRG00000000461(NR4A3),ENSBGRG00000000535,ENSBGRG00000000542(CRTC1),ENSBGRG00000000673(ADCY6),ENSBGRG00000000726(PPIE),ENSBGRG00000000764(CDKN1B),ENSBGRG00000000867(IKZF4),ENSBGRG00000000918(STK36),ENSBGRG00000000977(CERS1),ENSBGRG00000001078(WN…	0.00277532	0.125318		ko05033	Nicotine addiction	Human Diseases	Substance dependence	3	36	ENSBGRG00000000798(GABRG2),ENSBGRG00000020983(GRIA4),ENSBGRG00000010476(GRIA3)	0.612617	0.969893		BP	GO:0006893	Golgi to plasma membrane transport	4	65	0.00601802	0.164909	ENSBGRG00000001896(DENND4C),ENSBGRG00000015284(SPTBN1),ENSBGRG00000016568(ACSL3),ENSBGRG00000024953(DENND4A)
MF	GO:0004177	aminopeptidase activity	8	29	ENSBGRG00000000711(METAP2),ENSBGRG00000006217(XPNPEP3),ENSBGRG00000007748(XPNPEP2),ENSBGRG00000010401(METAP1D),ENSBGRG00000011474(TRHDE),ENSBGRG00000012532(MMP16),ENSBGRG00000020079(LAP3),ENSBGRG00000020501	0.0027799	0.150012		ko04662	B cell receptor signaling pathway	Organismal Systems	Immune system	5	61	ENSBGRG00000022867(CARD11),ENSBGRG00000002633(PPP3CA),ENSBGRG00000009260,ENSBGRG00000004554(VAV2),ENSBGRG00000019275(PLCG2)	0.616152	0.969893		CC	GO:0032982	myosin filament	2	11	0.00611645	0.1733	ENSBGRG00000007922(MYH6),ENSBGRG00000008351(MYH7)
BP	GO:0018130	heterocycle biosynthetic process	284	2742	ENSBGRG00000000004(VGLL3),ENSBGRG00000000061(GABPA),ENSBGRG00000000213(NFE2L2),ENSBGRG00000000235,ENSBGRG00000000283(HP1BP3),ENSBGRG00000000285(CIART),ENSBGRG00000000461(NR4A3),ENSBGRG00000000535,ENSBGRG00000000542(CRTC1),ENSBGRG00000000673(ADCY6),ENSBGRG00000000726(PPIE),ENSBGRG00000000764(CDKN1B),ENSBGRG00000000867(IKZF4),ENSBGRG00000000918(STK36),ENSBGRG00000000977(CERS1),ENSBGRG00000001078(WN…	0.00290784	0.129823		ko00280	Valine, leucine and isoleucine degradation	Metabolism	Amino acid metabolism	4	49	ENSBGRG00000006801(HADH),ENSBGRG00000002143(HIBADH),ENSBGRG00000019779(BCAT2),ENSBGRG00000001086	0.621923	0.969893		CC	GO:1990234	transferase complex	18	860	0.00613772	0.1733	ENSBGRG00000002321(FBXO42),ENSBGRG00000002824(USP33),ENSBGRG00000005235(TENT2),ENSBGRG00000005379(ATG5),ENSBGRG00000007714(RNF144B),ENSBGRG00000009157(DCAF17),ENSBGRG00000010600(PGGT1B),ENSBGRG00000012799(FBXW8),ENSBGRG00000012856(UBE2D1),ENSBGRG00000013378(FEM1C),ENSBGRG00000013819(INTS10),ENSBGRG00000014000(ASB3),ENSBGRG00000019540(CACUL1),ENSBGRG00000021365(PIK3C3),ENSBGRG00000021952(INTS7),EN…
BP	GO:0010941	regulation of cell death	118	1030	ENSBGRG00000000213(NFE2L2),ENSBGRG00000000221(F3),ENSBGRG00000000593(PRKAA2),ENSBGRG00000000764(CDKN1B),ENSBGRG00000000766(TRIM35),ENSBGRG00000000962(MCL1),ENSBGRG00000001004(VDAC1),ENSBGRG00000001078(WNT10B),ENSBGRG00000001329(STK17B),ENSBGRG00000001451(CHMP5),ENSBGRG00000001666(CASP6),ENSBGRG00000001756(NUGGC),ENSBGRG00000001892(ING5),ENSBGRG00000002134(CAV1),ENSBGRG00000002594(GLI2),ENSBGRG000…	0.0029106	0.129823		ko05332	Graft-versus-host disease	Human Diseases	Immune disease	4	49	ENSBGRG00000022452,ENSBGRG00000020643,ENSBGRG00000007038(FASLG),ENSBGRG00000017283(FAS)	0.621923	0.969893		MF	GO:0032555	purine ribonucleotide binding	15	636	0.00619047	0.105224	ENSBGRG00000001141(ABCA1),ENSBGRG00000006051(CDC42BPA),ENSBGRG00000006060(IGF1R),ENSBGRG00000008351(MYH7),ENSBGRG00000008463(TLK1),ENSBGRG00000010412(ATP2A2),ENSBGRG00000011586(ERCC6),ENSBGRG00000012475(EEFSEC),ENSBGRG00000014876(ATP7B),ENSBGRG00000015847(PDS5B),ENSBGRG00000020282(SMARCA5),ENSBGRG00000020672(ABCG2),ENSBGRG00000022891(RAF1),ENSBGRG00000023586(ABCC1),ENSBGRG00000026591(ENSBGRG00000…
BP	GO:2000116	regulation of cysteine-type endopeptidase activity	22	131	ENSBGRG00000000221(F3),ENSBGRG00000003405(NOD1),ENSBGRG00000003951(AQP1),ENSBGRG00000005464(USP47),ENSBGRG00000005672(SRC),ENSBGRG00000005913(DAPK1),ENSBGRG00000007038(FASLG),ENSBGRG00000008014(CST7),ENSBGRG00000009029(EGLN3),ENSBGRG00000009451(HIP1),ENSBGRG00000010161(MTCH1),ENSBGRG00000015017(SH3RF1),ENSBGRG00000016600(PDCD5),ENSBGRG00000017283(FAS),ENSBGRG00000018786(PTGS2),ENSBGRG00000019027(…	0.00297159	0.131741		ko04950	Maturity onset diabetes of the young	Human Diseases	Endocrine and metabolic disease	2	24	ENSBGRG00000006927(FOXA2),ENSBGRG00000017359(ONECUT1)	0.626725	0.969893		MF	GO:0018024	histone-lysine N-methyltransferase activity	3	33	0.00620888	0.105224	ENSBGRG00000011253(EHMT1),ENSBGRG00000016971(NSD3),ENSBGRG00000019016(SETD3)
BP	GO:1901362	organic cyclic compound biosynthetic process	290	2807	ENSBGRG00000000004(VGLL3),ENSBGRG00000000061(GABPA),ENSBGRG00000000213(NFE2L2),ENSBGRG00000000235,ENSBGRG00000000283(HP1BP3),ENSBGRG00000000285(CIART),ENSBGRG00000000461(NR4A3),ENSBGRG00000000535,ENSBGRG00000000542(CRTC1),ENSBGRG00000000673(ADCY6),ENSBGRG00000000726(PPIE),ENSBGRG00000000764(CDKN1B),ENSBGRG00000000867(IKZF4),ENSBGRG00000000918(STK36),ENSBGRG00000000977(CERS1),ENSBGRG00000001078(WN…	0.0030038	0.132366		ko00030	Pentose phosphate pathway	Metabolism	Carbohydrate metabolism	2	24	ENSBGRG00000011224(H6PD),ENSBGRG00000004498(PFKP)	0.626725	0.969893		BP	GO:0097435	supramolecular fiber organization	18	841	0.00622203	0.168481	ENSBGRG00000002518(DDR2),ENSBGRG00000003960(ENAH),ENSBGRG00000004749(MYL1),ENSBGRG00000005984(CSNK1D),ENSBGRG00000008613(ENSBGRG00000008613),ENSBGRG00000009644(PPP1R9A),ENSBGRG00000011309(ARHGAP18),ENSBGRG00000013023(RAPGEF1),ENSBGRG00000013584(NOX4),ENSBGRG00000013953(CKAP5),ENSBGRG00000015284(SPTBN1),ENSBGRG00000015359(THSD4),ENSBGRG00000019601(CAMSAP2),ENSBGRG00000020056(DLG1),ENSBGRG000000215…
MF	GO:0001216	DNA-binding transcription activator activity	43	319	ENSBGRG00000000061(GABPA),ENSBGRG00000000213(NFE2L2),ENSBGRG00000000461(NR4A3),ENSBGRG00000001954(ZNF395),ENSBGRG00000002070(GLIS1),ENSBGRG00000002337(ETV5),ENSBGRG00000002594(GLI2),ENSBGRG00000003613(PBX3),ENSBGRG00000003766(HOXC13),ENSBGRG00000003786(MYF6),ENSBGRG00000004012(PAX9),ENSBGRG00000004042(OSR2),ENSBGRG00000004899(DLX3),ENSBGRG00000005329(OTX2),ENSBGRG00000005831(KLF5),ENSBGRG00000007…	0.00306447	0.15598		ko00130	Ubiquinone and other terpenoid-quinone biosynthesis	Metabolism	Metabolism of cofactors and vitamins	1	11	ENSBGRG00000021631(COQ2)	0.630231	0.969893		BP	GO:0014706	striated muscle tissue development	12	466	0.00622821	0.168481	ENSBGRG00000001761(IFRD1),ENSBGRG00000002944(TOMM70),ENSBGRG00000005231(NIBAN2),ENSBGRG00000005379(ATG5),ENSBGRG00000006350(GPCPD1),ENSBGRG00000007622(SMAD1),ENSBGRG00000007922(MYH6),ENSBGRG00000008351(MYH7),ENSBGRG00000013584(NOX4),ENSBGRG00000022578(CFLAR),ENSBGRG00000024536(BMP5),ENSBGRG00000024593(TGFBR2)
BP	GO:0048584	positive regulation of response to stimulus	154	1394	ENSBGRG00000000213(NFE2L2),ENSBGRG00000000215(PLCL2),ENSBGRG00000000221(F3),ENSBGRG00000000428(ATR),ENSBGRG00000000918(STK36),ENSBGRG00000000962(MCL1),ENSBGRG00000001004(VDAC1),ENSBGRG00000001078(WNT10B),ENSBGRG00000001178(SGTA),ENSBGRG00000001666(CASP6),ENSBGRG00000001892(ING5),ENSBGRG00000002134(CAV1),ENSBGRG00000002228(IGFBP5),ENSBGRG00000002486(XRCC5),ENSBGRG00000002633(PPP3CA),ENSBGRG0000000…	0.00307028	0.134486		ko00603	Glycosphingolipid biosynthesis - globo and isoglobo series	Metabolism	Glycan biosynthesis and metabolism	1	11	ENSBGRG00000010420(NAGA)	0.630231	0.969893		BP	GO:0001865	NK T cell differentiation	2	11	0.00639857	0.169824	ENSBGRG00000021550(IKZF1),ENSBGRG00000024593(TGFBR2)
MF	GO:1901474	azole transmembrane transporter activity	4	8	ENSBGRG00000006751(SLC7A1),ENSBGRG00000010376(SLC15A4),ENSBGRG00000017235(SLC38A5),ENSBGRG00000017713(SLC44A4)	0.00310461	0.15598		ko03022	Basal transcription factors	Genetic Information Processing	Transcription	3	37	ENSBGRG00000015256(TAF2),ENSBGRG00000008564,ENSBGRG00000015289(TAF12)	0.63148	0.969893		BP	GO:0042395	ecdysis, collagen and cuticulin-based cuticle	2	11	0.00639857	0.169824	ENSBGRG00000013894(ANKS3),ENSBGRG00000021365(PIK3C3)
BP	GO:0042981	regulation of apoptotic process	108	933	ENSBGRG00000000213(NFE2L2),ENSBGRG00000000221(F3),ENSBGRG00000000593(PRKAA2),ENSBGRG00000000764(CDKN1B),ENSBGRG00000000766(TRIM35),ENSBGRG00000000962(MCL1),ENSBGRG00000001004(VDAC1),ENSBGRG00000001078(WNT10B),ENSBGRG00000001329(STK17B),ENSBGRG00000001666(CASP6),ENSBGRG00000001756(NUGGC),ENSBGRG00000001892(ING5),ENSBGRG00000002134(CAV1),ENSBGRG00000002594(GLI2),ENSBGRG00000002683(IL13),ENSBGRG0000…	0.00313554	0.136303		ko03420	Nucleotide excision repair	Genetic Information Processing	Replication and repair	3	37	ENSBGRG00000003610(RFC1),ENSBGRG00000010710(RFC5),ENSBGRG00000024546	0.63148	0.969893		BP	GO:0042908	xenobiotic transport	2	11	0.00639857	0.169824	ENSBGRG00000020672(ABCG2),ENSBGRG00000023586(ABCC1)
BP	GO:0006633	fatty acid biosynthetic process	15	77	ENSBGRG00000001005(TECR),ENSBGRG00000004114(ELOVL4),ENSBGRG00000008799(PDK4),ENSBGRG00000010766(INSIG1),ENSBGRG00000011880(MLXIPL),ENSBGRG00000014792(ACACA),ENSBGRG00000018041(MLYCD),ENSBGRG00000018786(PTGS2),ENSBGRG00000019509(ELOVL5),ENSBGRG00000022644(PLP1),ENSBGRG00000023293(SCD5),ENSBGRG00000025307(HACD3),ENSBGRG00000025402(ALOX15),ENSBGRG00000025849(DAGLB),ENSBGRG00000026739(ALOXE3)	0.00314905	0.136303		ko04935	Growth hormone synthesis, secretion and action	Organismal Systems	Endocrine system	8	99	ENSBGRG00000019275(PLCG2),ENSBGRG00000000673(ADCY6),ENSBGRG00000001167(PRKACB),ENSBGRG00000023559(PRKACA),ENSBGRG00000010257(STAT3),ENSBGRG00000010846(STAT5A),ENSBGRG00000001789(STAT1),ENSBGRG00000005168	0.6319	0.969893		CC	GO:0030424	axon	18	869	0.00681164	0.181644	ENSBGRG00000001728(ITPR2),ENSBGRG00000002518(DDR2),ENSBGRG00000002693(APBB2),ENSBGRG00000003960(ENAH),ENSBGRG00000005379(ATG5),ENSBGRG00000006060(IGF1R),ENSBGRG00000006248(PIKFYVE),ENSBGRG00000009644(PPP1R9A),ENSBGRG00000011372(BMP2K),ENSBGRG00000012244(GRIK4),ENSBGRG00000014267(DNAJC5),ENSBGRG00000015284(SPTBN1),ENSBGRG00000016288(MAGI2),ENSBGRG00000016568(ACSL3),ENSBGRG00000018618(DOCK7),ENSBGR…
BP	GO:2000403	positive regulation of lymphocyte migration	8	29	ENSBGRG00000010021(CCL20),ENSBGRG00000010308(ADAM10),ENSBGRG00000013247(NEDD9),ENSBGRG00000015313(ADAM8),ENSBGRG00000017585(WNK1),ENSBGRG00000018824(CXCL12),ENSBGRG00000021608(SELENOK),ENSBGRG00000022744(PYCARD)	0.00318759	0.13716		ko05132	Salmonella infection	Human Diseases	Infectious disease: bacterial	18	221	ENSBGRG00000006329(CYTH4),ENSBGRG00000007268(PIK3CG),ENSBGRG00000003405(NOD1),ENSBGRG00000013027(RAB7A),ENSBGRG00000022981(PLEKHM1),ENSBGRG00000021211,ENSBGRG00000001452(TUBA1B),ENSBGRG00000011024(RHOJ),ENSBGRG00000019097(DYNC2H1),ENSBGRG00000025775(CYTH3),ENSBGRG00000007080,ENSBGRG00000011942(KPNA4),ENSBGRG00000005442(CYFIP1),ENSBGRG00000021365(PIK3C3),ENSBGRG00000003534(ACTR3),ENSBGRG0000000904…	0.640962	0.978907		BP	GO:0048522	positive regulation of cellular process	83	5958	0.00691535	0.180857	ENSBGRG00000000262(BOLL),ENSBGRG00000000266(PROS1),ENSBGRG00000001761(IFRD1),ENSBGRG00000001896(DENND4C),ENSBGRG00000002158(HMBOX1),ENSBGRG00000002518(DDR2),ENSBGRG00000003960(ENAH),ENSBGRG00000004461(LRRK1),ENSBGRG00000005231(NIBAN2),ENSBGRG00000005235(TENT2),ENSBGRG00000005267(CCDC62),ENSBGRG00000005379(ATG5),ENSBGRG00000005748(KLF12),ENSBGRG00000005984(CSNK1D),ENSBGRG00000006060(IGF1R),ENSBGRG…
MF	GO:0032934	sterol binding	9	36	ENSBGRG00000001004(VDAC1),ENSBGRG00000001529(GRAMD1C),ENSBGRG00000002783(RORC),ENSBGRG00000003668(APOA1),ENSBGRG00000006833(ANXA6),ENSBGRG00000008046(STARD5),ENSBGRG00000010766(INSIG1),ENSBGRG00000013095(GRAMD1B),ENSBGRG00000019260(OSBPL7)	0.00321664	0.156221		ko04141	Protein processing in endoplasmic reticulum	Genetic Information Processing	Folding, sorting and degradation	13	161	ENSBGRG00000004174(CANX),ENSBGRG00000015446(LMAN1),ENSBGRG00000017898(SEL1L),ENSBGRG00000020026(HSPA5),ENSBGRG00000009304(MAN1A1),ENSBGRG00000013423(MARCHF6),ENSBGRG00000025420(LMAN1L),ENSBGRG00000009566(FBXO6),ENSBGRG00000000203(DDOST),ENSBGRG00000012555(NGLY1),ENSBGRG00000015642(PRKN),ENSBGRG00000000213(NFE2L2),ENSBGRG00000014168(UBE2J2)	0.643706	0.978907		BP	GO:1900073	regulation of neuromuscular synaptic transmission	3	35	0.00691637	0.180857	ENSBGRG00000006060(IGF1R),ENSBGRG00000014267(DNAJC5),ENSBGRG00000021677(SYNCRIP)
BP	GO:0033500	carbohydrate homeostasis	23	140	ENSBGRG00000000593(PRKAA2),ENSBGRG00000001895(ZBTB20),ENSBGRG00000002228(IGFBP5),ENSBGRG00000002454(LRRC8D),ENSBGRG00000004306,ENSBGRG00000007174(FOXO3),ENSBGRG00000007178(SLC12A7),ENSBGRG00000007842(KLF7),ENSBGRG00000008799(PDK4),ENSBGRG00000009401(CMKLR2),ENSBGRG00000010257(STAT3),ENSBGRG00000011880(MLXIPL),ENSBGRG00000011917(HK1),ENSBGRG00000013811(CDK16),ENSBGRG00000013814(STK11),ENSBGRG00000…	0.00322748	0.137262		ko04620	Toll-like receptor signaling pathway	Organismal Systems	Immune system	7	88	ENSBGRG00000016956(IL12B),ENSBGRG00000006318,ENSBGRG00000000131(IFNAR2),ENSBGRG00000015837(CXCL9),ENSBGRG00000020407(SPP1),ENSBGRG00000009042(RIPK1),ENSBGRG00000001789(STAT1)	0.647022	0.979437		BP	GO:0045926	negative regulation of growth	11	414	0.00694284	0.180857	ENSBGRG00000001761(IFRD1),ENSBGRG00000002693(APBB2),ENSBGRG00000002944(TOMM70),ENSBGRG00000003960(ENAH),ENSBGRG00000006060(IGF1R),ENSBGRG00000016568(ACSL3),ENSBGRG00000019951(CATHL6),ENSBGRG00000020148(FHL1),ENSBGRG00000020321(ENSBGRG00000020321),ENSBGRG00000021677(SYNCRIP),ENSBGRG00000024593(TGFBR2)
BP	GO:0042593	glucose homeostasis	23	140	ENSBGRG00000000593(PRKAA2),ENSBGRG00000001895(ZBTB20),ENSBGRG00000002228(IGFBP5),ENSBGRG00000002454(LRRC8D),ENSBGRG00000004306,ENSBGRG00000007174(FOXO3),ENSBGRG00000007178(SLC12A7),ENSBGRG00000007842(KLF7),ENSBGRG00000008799(PDK4),ENSBGRG00000009401(CMKLR2),ENSBGRG00000010257(STAT3),ENSBGRG00000011880(MLXIPL),ENSBGRG00000011917(HK1),ENSBGRG00000013811(CDK16),ENSBGRG00000013814(STK11),ENSBGRG00000…	0.00322748	0.137262		ko05142	Chagas disease	Human Diseases	Infectious disease: parasitic	8	101	ENSBGRG00000017283(FAS),ENSBGRG00000009912(PPP2R1B),ENSBGRG00000025440(SERPINE1),ENSBGRG00000007038(FASLG),ENSBGRG00000013000(NOS2),ENSBGRG00000003430(C1QC),ENSBGRG00000016956(IL12B),ENSBGRG00000013226(PPP2R2C)	0.654506	0.986242		BP	GO:0009894	regulation of catabolic process	21	1053	0.00705945	0.182766	ENSBGRG00000000262(BOLL),ENSBGRG00000002824(USP33),ENSBGRG00000004626(CBLB),ENSBGRG00000005235(TENT2),ENSBGRG00000005379(ATG5),ENSBGRG00000005984(CSNK1D),ENSBGRG00000006060(IGF1R),ENSBGRG00000006248(PIKFYVE),ENSBGRG00000007714(RNF144B),ENSBGRG00000007817(ATP6V1C1),ENSBGRG00000009278(TMEM67),ENSBGRG00000009838(NUP214),ENSBGRG00000012799(FBXW8),ENSBGRG00000019456(TBRG4),ENSBGRG00000021132(VMP1),ENS…
BP	GO:0008610	lipid biosynthetic process	50	377	ENSBGRG00000000237(AGPS),ENSBGRG00000000405(MFSD2A),ENSBGRG00000000593(PRKAA2),ENSBGRG00000000977(CERS1),ENSBGRG00000001005(TECR),ENSBGRG00000001895(ZBTB20),ENSBGRG00000002753(FDFT1),ENSBGRG00000003271(CEPT1),ENSBGRG00000003668(APOA1),ENSBGRG00000004114(ELOVL4),ENSBGRG00000004770(CERS3),ENSBGRG00000005204(AJUBA),ENSBGRG00000005861(LDLR),ENSBGRG00000008469(ST8SIA2),ENSBGRG00000008799(PDK4),ENSBGRG…	0.00325368	0.137576		ko04520	Adherens junction	Cellular Processes	Cellular community - eukaryotes	5	64	ENSBGRG00000013920(NECTIN1),ENSBGRG00000024537(SMAD4),ENSBGRG00000005672(SRC),ENSBGRG00000024466(PTPRM),ENSBGRG00000020545(FER)	0.658969	0.988454		BP	GO:0007266	Rho protein signal transduction	6	152	0.00726303	0.184772	ENSBGRG00000001141(ABCA1),ENSBGRG00000016018(ABR),ENSBGRG00000017494(DOCK11),ENSBGRG00000018618(DOCK7),ENSBGRG00000022862(DOCK9),ENSBGRG00000022891(RAF1)
BP	GO:0006560	proline metabolic process	4	8	ENSBGRG00000003404(ALDH4A1),ENSBGRG00000004273(PYCR1),ENSBGRG00000023825(PRODH2),ENSBGRG00000025600(ALDH18A1)	0.00336625	0.139119		ko05017	Spinocerebellar ataxia	Human Diseases	Neurodegenerative disease	10	127	ENSBGRG00000001004(VDAC1),ENSBGRG00000011453,ENSBGRG00000021365(PIK3C3),ENSBGRG00000021126(PSMC4),ENSBGRG00000015635(PSMD14),ENSBGRG00000016741(SLC1A6),ENSBGRG00000010476(GRIA3),ENSBGRG00000001070(ATXN10),ENSBGRG00000019027(ATP2A3),ENSBGRG00000010593(PDYN)	0.668406	0.988982		BP	GO:0110053	regulation of actin filament organization	9	304	0.0072741	0.184772	ENSBGRG00000003960(ENAH),ENSBGRG00000005984(CSNK1D),ENSBGRG00000008613(ENSBGRG00000008613),ENSBGRG00000009644(PPP1R9A),ENSBGRG00000011309(ARHGAP18),ENSBGRG00000013584(NOX4),ENSBGRG00000020056(DLG1),ENSBGRG00000024593(TGFBR2),ENSBGRG00000024670(LMOD2)
BP	GO:0010587	miRNA catabolic process	4	8	ENSBGRG00000004803(LIN28B),ENSBGRG00000019933(DIS3L2),ENSBGRG00000023300(SND1),ENSBGRG00000026089(PARN)	0.00336625	0.139119		ko04720	Long-term potentiation	Organismal Systems	Nervous system	4	52	ENSBGRG00000001167(PRKACB),ENSBGRG00000023559(PRKACA),ENSBGRG00000021420(CAMK2A),ENSBGRG00000002633(PPP3CA)	0.668935	0.988982		BP	GO:0010883	regulation of lipid storage	5	108	0.00728967	0.184772	ENSBGRG00000001141(ABCA1),ENSBGRG00000006060(IGF1R),ENSBGRG00000010412(ATP2A2),ENSBGRG00000016568(ACSL3),ENSBGRG00000024270(FTO)
BP	GO:0032310	prostaglandin secretion	4	8	ENSBGRG00000010102(P2RX7),ENSBGRG00000013000(NOS2),ENSBGRG00000018786(PTGS2),ENSBGRG00000023249(LEP)	0.00336625	0.139119		ko04742	Taste transduction	Organismal Systems	Sensory system	5	65	ENSBGRG00000008823(P2RY4),ENSBGRG00000001167(PRKACB),ENSBGRG00000023559(PRKACA),ENSBGRG00000000673(ADCY6),ENSBGRG00000019964(ASIC2)	0.672537	0.988982		BP	GO:0050773	regulation of dendrite development	8	251	0.00732689	0.184772	ENSBGRG00000007622(SMAD1),ENSBGRG00000009644(PPP1R9A),ENSBGRG00000011253(EHMT1),ENSBGRG00000012799(FBXW8),ENSBGRG00000015942(EBF1),ENSBGRG00000019601(CAMSAP2),ENSBGRG00000024381(EEF2K),ENSBGRG00000024536(BMP5)
BP	GO:2000831	regulation of steroid hormone secretion	4	8	ENSBGRG00000008588(REN),ENSBGRG00000015409(CRY1),ENSBGRG00000019832(C1QTNF1),ENSBGRG00000023482(GALR1)	0.00336625	0.139119		ko04380	Osteoclast differentiation	Organismal Systems	Development and regeneration	8	103	ENSBGRG00000001789(STAT1),ENSBGRG00000022164(FOSB),ENSBGRG00000002633(PPP3CA),ENSBGRG00000020676(CSF1R),ENSBGRG00000006023(FHL2),ENSBGRG00000019275(PLCG2),ENSBGRG00000015763(CALCR),ENSBGRG00000000131(IFNAR2)	0.676284	0.988982		BP	GO:0048518	positive regulation of biological process	89	6492	0.00735586	0.184772	ENSBGRG00000000262(BOLL),ENSBGRG00000000266(PROS1),ENSBGRG00000001023(TBXAS1),ENSBGRG00000001141(ABCA1),ENSBGRG00000001761(IFRD1),ENSBGRG00000001896(DENND4C),ENSBGRG00000002158(HMBOX1),ENSBGRG00000002518(DDR2),ENSBGRG00000002944(TOMM70),ENSBGRG00000003960(ENAH),ENSBGRG00000004461(LRRK1),ENSBGRG00000004626(CBLB),ENSBGRG00000005231(NIBAN2),ENSBGRG00000005235(TENT2),ENSBGRG00000005267(CCDC62),ENSBGR…
BP	GO:0002682	regulation of immune system process	102	876	ENSBGRG00000000061(GABPA),ENSBGRG00000000213(NFE2L2),ENSBGRG00000000215(PLCL2),ENSBGRG00000001078(WNT10B),ENSBGRG00000001621(AQP3),ENSBGRG00000001666(CASP6),ENSBGRG00000001789(STAT1),ENSBGRG00000001988(FCRLB),ENSBGRG00000002134(CAV1),ENSBGRG00000002486(XRCC5),ENSBGRG00000002633(PPP3CA),ENSBGRG00000002683(IL13),ENSBGRG00000002944(TOMM70),ENSBGRG00000003405(NOD1),ENSBGRG00000003430(C1QC),ENSBGRG000…	0.00338895	0.13927		ko05226	Gastric cancer	Human Diseases	Cancer: specific types	10	128	ENSBGRG00000000764(CDKN1B),ENSBGRG00000024537(SMAD4),ENSBGRG00000013093(FGF7),ENSBGRG00000005168,ENSBGRG00000001078(WNT10B),ENSBGRG00000020100(RB1),ENSBGRG00000010536(FGF2),ENSBGRG00000012559(DVL1),ENSBGRG00000019557(WNT5B),ENSBGRG00000007688(FZD6)	0.678086	0.988982		BP	GO:0007097	nuclear migration	4	69	0.00742463	0.184859	ENSBGRG00000005235(TENT2),ENSBGRG00000006051(CDC42BPA),ENSBGRG00000018618(DOCK7),ENSBGRG00000018694(USP9X)
BP	GO:0007267	cell-cell signaling	93	788	ENSBGRG00000000215(PLCL2),ENSBGRG00000000798(GABRG2),ENSBGRG00000001004(VDAC1),ENSBGRG00000001078(WNT10B),ENSBGRG00000001347(LMBR1L),ENSBGRG00000002134(CAV1),ENSBGRG00000002594(GLI2),ENSBGRG00000002633(PPP3CA),ENSBGRG00000002918(PFDN5),ENSBGRG00000003307(TBL1XR1),ENSBGRG00000003804(CDC73),ENSBGRG00000003951(AQP1),ENSBGRG00000004306,ENSBGRG00000004372(NTRK2),ENSBGRG00000004379(NOTUM),ENSBGRG000000…	0.00343916	0.140544		ko04210	Apoptosis	Cellular Processes	Cell growth and death	9	116	ENSBGRG00000005223(PARP1),ENSBGRG00000000962(MCL1),ENSBGRG00000009042(RIPK1),ENSBGRG00000007038(FASLG),ENSBGRG00000001666(CASP6),ENSBGRG00000017283(FAS),ENSBGRG00000016285,ENSBGRG00000001452(TUBA1B),ENSBGRG00000014113(ATM)	0.682	0.988982		BP	GO:0051124	synaptic growth at neuromuscular junction	7	201	0.00749374	0.184859	ENSBGRG00000003960(ENAH),ENSBGRG00000006060(IGF1R),ENSBGRG00000008613(ENSBGRG00000008613),ENSBGRG00000015284(SPTBN1),ENSBGRG00000016568(ACSL3),ENSBGRG00000021677(SYNCRIP),ENSBGRG00000024536(BMP5)
BP	GO:0045892	negative regulation of transcription, DNA-templated	95	808	ENSBGRG00000000061(GABPA),ENSBGRG00000000285(CIART),ENSBGRG00000000764(CDKN1B),ENSBGRG00000000867(IKZF4),ENSBGRG00000001078(WNT10B),ENSBGRG00000001485(NFX1),ENSBGRG00000001895(ZBTB20),ENSBGRG00000001901(FOXP2),ENSBGRG00000002070(GLIS1),ENSBGRG00000002134(CAV1),ENSBGRG00000002337(ETV5),ENSBGRG00000002486(XRCC5),ENSBGRG00000002538(SMAD5),ENSBGRG00000002594(GLI2),ENSBGRG00000002783(RORC),ENSBGRG0000…	0.0034905	0.141247		ko00830	Retinol metabolism	Metabolism	Metabolism of cofactors and vitamins	4	53	ENSBGRG00000025285,ENSBGRG00000011055,ENSBGRG00000020434(CYP2S1),ENSBGRG00000022755(BCO1)	0.683682	0.988982		BP	GO:0006892	post-Golgi vesicle-mediated transport	5	109	0.00757264	0.184859	ENSBGRG00000001896(DENND4C),ENSBGRG00000015284(SPTBN1),ENSBGRG00000016568(ACSL3),ENSBGRG00000016974(NBEA),ENSBGRG00000024953(DENND4A)
BP	GO:0046889	positive regulation of lipid biosynthetic process	11	49	ENSBGRG00000000405(MFSD2A),ENSBGRG00000001895(ZBTB20),ENSBGRG00000005861(LDLR),ENSBGRG00000011705(CNEP1R1),ENSBGRG00000011880(MLXIPL),ENSBGRG00000012214(SCARB1),ENSBGRG00000018786(PTGS2),ENSBGRG00000019509(ELOVL5),ENSBGRG00000020463(NR1D1),ENSBGRG00000021837(CGA),ENSBGRG00000024816(ADGRF5)	0.00349496	0.141247		ko04971	Gastric acid secretion	Organismal Systems	Digestive system	5	66	ENSBGRG00000001167(PRKACB),ENSBGRG00000023559(PRKACA),ENSBGRG00000000673(ADCY6),ENSBGRG00000021420(CAMK2A),ENSBGRG00000017325(ATP4B)	0.685744	0.988982		BP	GO:0140352	export from cell	31	1772	0.00757323	0.184859	ENSBGRG00000000266(PROS1),ENSBGRG00000000629(GNPTAB),ENSBGRG00000001141(ABCA1),ENSBGRG00000001728(ITPR2),ENSBGRG00000001896(DENND4C),ENSBGRG00000005231(NIBAN2),ENSBGRG00000005379(ATG5),ENSBGRG00000005984(CSNK1D),ENSBGRG00000008227(UBR5),ENSBGRG00000008434(UBE2Q1),ENSBGRG00000009140(PRKCH),ENSBGRG00000009644(PPP1R9A),ENSBGRG00000010412(ATP2A2),ENSBGRG00000012550(ATP8B4),ENSBGRG00000014267(DNAJC5),…
BP	GO:0032760	positive regulation of tumor necrosis factor production	12	56	ENSBGRG00000001895(ZBTB20),ENSBGRG00000003405(NOD1),ENSBGRG00000009042(RIPK1),ENSBGRG00000010257(STAT3),ENSBGRG00000011274(DHX9),ENSBGRG00000016090(MAPKAPK2),ENSBGRG00000016956(IL12B),ENSBGRG00000019275(PLCG2),ENSBGRG00000019776(CLEC7A),ENSBGRG00000021608(SELENOK),ENSBGRG00000022744(PYCARD),ENSBGRG00000023249(LEP)	0.00351506	0.141278		ko05016	Huntington disease	Human Diseases	Neurodegenerative disease	22	276	ENSBGRG00000009451(HIP1),ENSBGRG00000020983(GRIA4),ENSBGRG00000024995,ENSBGRG00000007250(DNAH8),ENSBGRG00000021305(CLTC),ENSBGRG00000026030(TUBB4A),ENSBGRG00000021365(PIK3C3),ENSBGRG00000010476(GRIA3),ENSBGRG00000010730(NDUFA6),ENSBGRG00000015635(PSMD14),ENSBGRG00000019113(TFAM),ENSBGRG00000001004(VDAC1),ENSBGRG00000008576,ENSBGRG00000014262(PPARGC1A),ENSBGRG00000018062(DNAH5),ENSBGRG00000020965(…	0.688771	0.988982		MF	GO:0032553	ribonucleotide binding	15	651	0.00761076	0.118671	ENSBGRG00000001141(ABCA1),ENSBGRG00000006051(CDC42BPA),ENSBGRG00000006060(IGF1R),ENSBGRG00000008351(MYH7),ENSBGRG00000008463(TLK1),ENSBGRG00000010412(ATP2A2),ENSBGRG00000011586(ERCC6),ENSBGRG00000012475(EEFSEC),ENSBGRG00000014876(ATP7B),ENSBGRG00000015847(PDS5B),ENSBGRG00000020282(SMARCA5),ENSBGRG00000020672(ABCG2),ENSBGRG00000022891(RAF1),ENSBGRG00000023586(ABCC1),ENSBGRG00000026591(ENSBGRG00000…
BP	GO:0071840	cellular component organization or biogenesis	402	4014	ENSBGRG00000000074(N6AMT1),ENSBGRG00000000197(EPHA3),ENSBGRG00000000283(HP1BP3),ENSBGRG00000000405(MFSD2A),ENSBGRG00000000428(ATR),ENSBGRG00000000440(PYM1),ENSBGRG00000000520(DPYSL2),ENSBGRG00000000542(CRTC1),ENSBGRG00000000587(GPSM2),ENSBGRG00000000593(PRKAA2),ENSBGRG00000000645(GMNC),ENSBGRG00000000682(CECR2),ENSBGRG00000000764(CDKN1B),ENSBGRG00000000770(ECE1),ENSBGRG00000000798(GABRG2),ENSBGRG…	0.0035587	0.142251		ko04664	Fc epsilon RI signaling pathway	Organismal Systems	Immune system	4	54	ENSBGRG00000009260,ENSBGRG00000004554(VAV2),ENSBGRG00000019275(PLCG2),ENSBGRG00000002683(IL13)	0.697963	0.988982		BP	GO:0002645	positive regulation of tolerance induction	2	12	0.00762214	0.184859	ENSBGRG00000004626(CBLB),ENSBGRG00000024593(TGFBR2)
BP	GO:0048583	regulation of response to stimulus	260	2499	ENSBGRG00000000213(NFE2L2),ENSBGRG00000000215(PLCL2),ENSBGRG00000000221(F3),ENSBGRG00000000266(PROS1),ENSBGRG00000000428(ATR),ENSBGRG00000000593(PRKAA2),ENSBGRG00000000764(CDKN1B),ENSBGRG00000000909(FSTL4),ENSBGRG00000000918(STK36),ENSBGRG00000000962(MCL1),ENSBGRG00000001004(VDAC1),ENSBGRG00000001078(WNT10B),ENSBGRG00000001111(C9orf72),ENSBGRG00000001167(PRKACB),ENSBGRG00000001178(SGTA),ENSBGRG00…	0.00360133	0.143172		ko05224	Breast cancer	Human Diseases	Cancer: specific types	10	131	ENSBGRG00000010536(FGF2),ENSBGRG00000020100(RB1),ENSBGRG00000006109(FLT4),ENSBGRG00000012559(DVL1),ENSBGRG00000006002(JAG2),ENSBGRG00000019557(WNT5B),ENSBGRG00000007688(FZD6),ENSBGRG00000013093(FGF7),ENSBGRG00000005168,ENSBGRG00000001078(WNT10B)	0.7061	0.988982		BP	GO:0002664	regulation of T cell tolerance induction	2	12	0.00762214	0.184859	ENSBGRG00000004626(CBLB),ENSBGRG00000024593(TGFBR2)
BP	GO:0002833	positive regulation of response to biotic stimulus	19	109	ENSBGRG00000001666(CASP6),ENSBGRG00000002486(XRCC5),ENSBGRG00000002944(TOMM70),ENSBGRG00000003405(NOD1),ENSBGRG00000006153(FCN1),ENSBGRG00000010376(SLC15A4),ENSBGRG00000011045(LSM14A),ENSBGRG00000012122(MR1),ENSBGRG00000012275(DHX58),ENSBGRG00000015313(ADAM8),ENSBGRG00000015363(CRTAM),ENSBGRG00000016821(TRIM62),ENSBGRG00000016956(IL12B),ENSBGRG00000018460(SASH1),ENSBGRG00000019275(PLCG2),ENSBGRG0…	0.00363503	0.143731		ko00910	Nitrogen metabolism	Metabolism	Energy metabolism	1	14	ENSBGRG00000026902(CA7)	0.718178	0.988982		MF	GO:0017076	purine nucleotide binding	15	653	0.00781843	0.118671	ENSBGRG00000001141(ABCA1),ENSBGRG00000006051(CDC42BPA),ENSBGRG00000006060(IGF1R),ENSBGRG00000008351(MYH7),ENSBGRG00000008463(TLK1),ENSBGRG00000010412(ATP2A2),ENSBGRG00000011586(ERCC6),ENSBGRG00000012475(EEFSEC),ENSBGRG00000014876(ATP7B),ENSBGRG00000015847(PDS5B),ENSBGRG00000020282(SMARCA5),ENSBGRG00000020672(ABCG2),ENSBGRG00000022891(RAF1),ENSBGRG00000023586(ABCC1),ENSBGRG00000026591(ENSBGRG00000…
BP	GO:0006796	phosphate-containing compound metabolic process	223	2112	ENSBGRG00000000197(EPHA3),ENSBGRG00000000405(MFSD2A),ENSBGRG00000000428(ATR),ENSBGRG00000000593(PRKAA2),ENSBGRG00000000673(ADCY6),ENSBGRG00000000764(CDKN1B),ENSBGRG00000000918(STK36),ENSBGRG00000001111(C9orf72),ENSBGRG00000001150(PRKAG1),ENSBGRG00000001167(PRKACB),ENSBGRG00000001329(STK17B),ENSBGRG00000001422(RPAP2),ENSBGRG00000001473(GUCY2C),ENSBGRG00000001845(KAT2B),ENSBGRG00000001869(DTYMK),EN…	0.00365901	0.143901		ko04914	Progesterone-mediated oocyte maturation	Organismal Systems	Endocrine system	6	82	ENSBGRG00000011397(AURKA),ENSBGRG00000003311(ANAPC13),ENSBGRG00000001167(PRKACB),ENSBGRG00000023559(PRKACA),ENSBGRG00000000673(ADCY6),ENSBGRG00000010293(ANAPC2)	0.723347	0.988982		MF	GO:0005089	Rho guanyl-nucleotide exchange factor activity	4	69	0.00797424	0.118671	ENSBGRG00000016018(ABR),ENSBGRG00000017494(DOCK11),ENSBGRG00000018618(DOCK7),ENSBGRG00000022862(DOCK9)
MF	GO:0004683	calmodulin-dependent protein kinase activity	5	13	ENSBGRG00000005913(DAPK1),ENSBGRG00000012404(CAMK2B),ENSBGRG00000021420(CAMK2A),ENSBGRG00000024170(CAMK1G),ENSBGRG00000024381(EEF2K)	0.00365985	0.172013		ko04978	Mineral absorption	Organismal Systems	Digestive system	4	56	ENSBGRG00000003645(SLC40A1),ENSBGRG00000008637(HEPH),ENSBGRG00000007536(SLC6A19),ENSBGRG00000014876(ATP7B)	0.72512	0.988982		BP	GO:0070201	regulation of establishment of protein localization	18	864	0.008132	0.195687	ENSBGRG00000001728(ITPR2),ENSBGRG00000001896(DENND4C),ENSBGRG00000002944(TOMM70),ENSBGRG00000005379(ATG5),ENSBGRG00000005984(CSNK1D),ENSBGRG00000006060(IGF1R),ENSBGRG00000008227(UBR5),ENSBGRG00000009838(NUP214),ENSBGRG00000015284(SPTBN1),ENSBGRG00000016568(ACSL3),ENSBGRG00000019951(CATHL6),ENSBGRG00000020321(ENSBGRG00000020321),ENSBGRG00000021365(PIK3C3),ENSBGRG00000024593(TGFBR2),ENSBGRG00000024…
BP	GO:0042474	middle ear morphogenesis	6	18	ENSBGRG00000004042(OSR2),ENSBGRG00000008619(SIX1),ENSBGRG00000010388(MSX1),ENSBGRG00000010766(INSIG1),ENSBGRG00000012869(EYA1),ENSBGRG00000022648(TSHZ1)	0.00372634	0.144397		ko04260	Cardiac muscle contraction	Organismal Systems	Circulatory system	6	83	ENSBGRG00000019027(ATP2A3),ENSBGRG00000024995,ENSBGRG00000021687(CACNA2D3),ENSBGRG00000003979,ENSBGRG00000021871(CACNG6),ENSBGRG00000021717(CACNG7)	0.734179	0.988982		BP	GO:0009950	dorsal/ventral axis specification	5	111	0.00816137	0.195687	ENSBGRG00000004626(CBLB),ENSBGRG00000018694(USP9X),ENSBGRG00000018952(TRAK1),ENSBGRG00000021677(SYNCRIP),ENSBGRG00000022891(RAF1)
BP	GO:0060907	positive regulation of macrophage cytokine production	6	18	ENSBGRG00000003405(NOD1),ENSBGRG00000004203(SEMA7A),ENSBGRG00000010102(P2RX7),ENSBGRG00000016090(MAPKAPK2),ENSBGRG00000019275(PLCG2),ENSBGRG00000022744(PYCARD)	0.00372634	0.144397		ko05164	Influenza A	Human Diseases	Infectious disease: viral	11	148	ENSBGRG00000016956(IL12B),ENSBGRG00000000131(IFNAR2),ENSBGRG00000001004(VDAC1),ENSBGRG00000022186(NXT2),ENSBGRG00000014066(MX1),ENSBGRG00000022744(PYCARD),ENSBGRG00000007038(FASLG),ENSBGRG00000017283(FAS),ENSBGRG00000022452,ENSBGRG00000001789(STAT1),ENSBGRG00000010086(KPNA2)	0.743733	0.988982		BP	GO:0009888	tissue development	46	2930	0.00827163	0.197211	ENSBGRG00000000629(GNPTAB),ENSBGRG00000001761(IFRD1),ENSBGRG00000002518(DDR2),ENSBGRG00000002944(TOMM70),ENSBGRG00000003960(ENAH),ENSBGRG00000004149(PTBP3),ENSBGRG00000004626(CBLB),ENSBGRG00000005231(NIBAN2),ENSBGRG00000005379(ATG5),ENSBGRG00000005984(CSNK1D),ENSBGRG00000006060(IGF1R),ENSBGRG00000006350(GPCPD1),ENSBGRG00000007622(SMAD1),ENSBGRG00000007922(MYH6),ENSBGRG00000008227(UBR5),ENSBGRG000…
BP	GO:1902679	negative regulation of RNA biosynthetic process	95	810	ENSBGRG00000000061(GABPA),ENSBGRG00000000285(CIART),ENSBGRG00000000764(CDKN1B),ENSBGRG00000000867(IKZF4),ENSBGRG00000001078(WNT10B),ENSBGRG00000001485(NFX1),ENSBGRG00000001895(ZBTB20),ENSBGRG00000001901(FOXP2),ENSBGRG00000002070(GLIS1),ENSBGRG00000002134(CAV1),ENSBGRG00000002337(ETV5),ENSBGRG00000002486(XRCC5),ENSBGRG00000002538(SMAD5),ENSBGRG00000002594(GLI2),ENSBGRG00000002783(RORC),ENSBGRG0000…	0.00375056	0.144397		ko00620	Pyruvate metabolism	Metabolism	Carbohydrate metabolism	3	44	ENSBGRG00000025466(ME3),ENSBGRG00000014792(ACACA),ENSBGRG00000008277(ACSS1)	0.7454	0.988982		BP	GO:0000045	autophagosome assembly	5	112	0.00846733	0.200742	ENSBGRG00000005379(ATG5),ENSBGRG00000006060(IGF1R),ENSBGRG00000006248(PIKFYVE),ENSBGRG00000021132(VMP1),ENSBGRG00000021365(PIK3C3)
BP	GO:1903507	negative regulation of nucleic acid-templated transcription	95	810	ENSBGRG00000000061(GABPA),ENSBGRG00000000285(CIART),ENSBGRG00000000764(CDKN1B),ENSBGRG00000000867(IKZF4),ENSBGRG00000001078(WNT10B),ENSBGRG00000001485(NFX1),ENSBGRG00000001895(ZBTB20),ENSBGRG00000001901(FOXP2),ENSBGRG00000002070(GLIS1),ENSBGRG00000002134(CAV1),ENSBGRG00000002337(ETV5),ENSBGRG00000002486(XRCC5),ENSBGRG00000002538(SMAD5),ENSBGRG00000002594(GLI2),ENSBGRG00000002783(RORC),ENSBGRG0000…	0.00375056	0.144397		ko04730	Long-term depression	Organismal Systems	Nervous system	3	44	ENSBGRG00000011775(NOS1),ENSBGRG00000009912(PPP2R1B),ENSBGRG00000010476(GRIA3)	0.7454	0.988982		MF	GO:0003824	catalytic activity	74	5159	0.00847264	0.118671	ENSBGRG00000000599(ENSBGRG00000000599),ENSBGRG00000000629(GNPTAB),ENSBGRG00000001023(TBXAS1),ENSBGRG00000001141(ABCA1),ENSBGRG00000002518(DDR2),ENSBGRG00000002824(USP33),ENSBGRG00000004129(PMS1),ENSBGRG00000004461(LRRK1),ENSBGRG00000004626(CBLB),ENSBGRG00000005235(TENT2),ENSBGRG00000005383(DGKH),ENSBGRG00000005867(OXNAD1),ENSBGRG00000005984(CSNK1D),ENSBGRG00000006051(CDC42BPA),ENSBGRG00000006060(…
BP	GO:0046483	heterocycle metabolic process	386	3845	ENSBGRG00000000004(VGLL3),ENSBGRG00000000061(GABPA),ENSBGRG00000000074(N6AMT1),ENSBGRG00000000213(NFE2L2),ENSBGRG00000000235,ENSBGRG00000000283(HP1BP3),ENSBGRG00000000285(CIART),ENSBGRG00000000351(EEPD1),ENSBGRG00000000440(PYM1),ENSBGRG00000000461(NR4A3),ENSBGRG00000000535,ENSBGRG00000000542(CRTC1),ENSBGRG00000000645(GMNC),ENSBGRG00000000673(ADCY6),ENSBGRG00000000726(PPIE),ENSBGRG00000000764(CDKN…	0.00380034	0.145547		ko04130	SNARE interactions in vesicular transport	Genetic Information Processing	Folding, sorting and degradation	2	30	ENSBGRG00000012169(YKT6),ENSBGRG00000006462(VAMP4)	0.745619	0.988982		MF	GO:0017137	Rab GTPase binding	7	202	0.00854341	0.118671	ENSBGRG00000001896(DENND4C),ENSBGRG00000004086(DENND5B),ENSBGRG00000004274(RABGAP1L),ENSBGRG00000007364(DENND2B),ENSBGRG00000015822(RABGAP1),ENSBGRG00000024679(PICALM),ENSBGRG00000024953(DENND4A)
BP	GO:0008104	protein localization	163	1494	ENSBGRG00000000197(EPHA3),ENSBGRG00000000428(ATR),ENSBGRG00000000587(GPSM2),ENSBGRG00000000593(PRKAA2),ENSBGRG00000000785(DDX39A),ENSBGRG00000001178(SGTA),ENSBGRG00000001676(ZDHHC23),ENSBGRG00000002134(CAV1),ENSBGRG00000002167(SNX13),ENSBGRG00000002249(DZIP1L),ENSBGRG00000002429(AHCYL1),ENSBGRG00000002633(PPP3CA),ENSBGRG00000003435,ENSBGRG00000003553(AP1M2),ENSBGRG00000003686(ANKS1B),ENSBGRG00000…	0.00384689	0.146563		ko04612	Antigen processing and presentation	Organismal Systems	Immune system	5	71	ENSBGRG00000020026(HSPA5),ENSBGRG00000004174(CANX),ENSBGRG00000020643,ENSBGRG00000022452,ENSBGRG00000018381	0.746291	0.988982		BP	GO:0030049	muscle filament sliding	3	38	0.00869974	0.203302	ENSBGRG00000004749(MYL1),ENSBGRG00000007922(MYH6),ENSBGRG00000008351(MYH7)
BP	GO:0008152	metabolic process	780	8205	ENSBGRG00000000004(VGLL3),ENSBGRG00000000061(GABPA),ENSBGRG00000000074(N6AMT1),ENSBGRG00000000197(EPHA3),ENSBGRG00000000203(DDOST),ENSBGRG00000000213(NFE2L2),ENSBGRG00000000215(PLCL2),ENSBGRG00000000221(F3),ENSBGRG00000000235,ENSBGRG00000000237(AGPS),ENSBGRG00000000283(HP1BP3),ENSBGRG00000000285(CIART),ENSBGRG00000000351(EEPD1),ENSBGRG00000000405(MFSD2A),ENSBGRG00000000428(ATR),ENSBGRG00000000440…	0.003879	0.14702		ko00010	Glycolysis / Gluconeogenesis	Metabolism	Carbohydrate metabolism	4	58	ENSBGRG00000011917(HK1),ENSBGRG00000008277(ACSS1),ENSBGRG00000004485(G6PC3),ENSBGRG00000004498(PFKP)	0.75042	0.988982		BP	GO:0050769	positive regulation of neurogenesis	15	674	0.00871959	0.203302	ENSBGRG00000002518(DDR2),ENSBGRG00000005984(CSNK1D),ENSBGRG00000006060(IGF1R),ENSBGRG00000007622(SMAD1),ENSBGRG00000009140(PRKCH),ENSBGRG00000009644(PPP1R9A),ENSBGRG00000011253(EHMT1),ENSBGRG00000012799(FBXW8),ENSBGRG00000016288(MAGI2),ENSBGRG00000018952(TRAK1),ENSBGRG00000022578(CFLAR),ENSBGRG00000022891(RAF1),ENSBGRG00000024381(EEF2K),ENSBGRG00000024536(BMP5),ENSBGRG00000024679(PICALM)
BP	GO:0032205	negative regulation of telomere maintenance	8	30	ENSBGRG00000002486(XRCC5),ENSBGRG00000005672(SRC),ENSBGRG00000007192(TERF2),ENSBGRG00000011128(EXOSC10),ENSBGRG00000011864(NBN),ENSBGRG00000014113(ATM),ENSBGRG00000019234(NAT10),ENSBGRG00000025654(TNKS)	0.00401047	0.151079		ko04660	T cell receptor signaling pathway	Organismal Systems	Immune system	7	98	ENSBGRG00000004554(VAV2),ENSBGRG00000002633(PPP3CA),ENSBGRG00000018381,ENSBGRG00000012573(NCK2),ENSBGRG00000012246(ICOS),ENSBGRG00000011285(PAK5),ENSBGRG00000022867(CARD11)	0.754233	0.988982		BP	GO:0051641	cellular localization	56	3741	0.00881467	0.203302	ENSBGRG00000000266(PROS1),ENSBGRG00000000629(GNPTAB),ENSBGRG00000001141(ABCA1),ENSBGRG00000001484(SEC24B),ENSBGRG00000001728(ITPR2),ENSBGRG00000001896(DENND4C),ENSBGRG00000002944(TOMM70),ENSBGRG00000003322(WDR33),ENSBGRG00000003783(SPTB),ENSBGRG00000003960(ENAH),ENSBGRG00000004274(RABGAP1L),ENSBGRG00000004626(CBLB),ENSBGRG00000005235(TENT2),ENSBGRG00000005343(ENSBGRG00000005343),ENSBGRG0000000537…
MF	GO:1901363	heterocyclic compound binding	385	3921	ENSBGRG00000000061(GABPA),ENSBGRG00000000074(N6AMT1),ENSBGRG00000000174,ENSBGRG00000000197(EPHA3),ENSBGRG00000000213(NFE2L2),ENSBGRG00000000235,ENSBGRG00000000237(AGPS),ENSBGRG00000000250(ATP13A5),ENSBGRG00000000283(HP1BP3),ENSBGRG00000000285(CIART),ENSBGRG00000000288(PDE11A),ENSBGRG00000000341(RBM45),ENSBGRG00000000351(EEPD1),ENSBGRG00000000420(EIF4G3),ENSBGRG00000000461(NR4A3),ENSBGRG0000000059…	0.0040249	0.183259		ko04120	Ubiquitin mediated proteolysis	Genetic Information Processing	Folding, sorting and degradation	10	137	ENSBGRG00000015642(PRKN),ENSBGRG00000005533(COP1),ENSBGRG00000001864(UBE2R2),ENSBGRG00000014168(UBE2J2),ENSBGRG00000022493(PIAS1),ENSBGRG00000022733(KLHL13),ENSBGRG00000010293(ANAPC2),ENSBGRG00000022211(UBE4A),ENSBGRG00000003311(ANAPC13),ENSBGRG00000021434(HERC3)	0.757341	0.988982		BP	GO:0033036	macromolecule localization	52	3418	0.00882279	0.203302	ENSBGRG00000000629(GNPTAB),ENSBGRG00000001141(ABCA1),ENSBGRG00000001728(ITPR2),ENSBGRG00000001896(DENND4C),ENSBGRG00000002944(TOMM70),ENSBGRG00000003322(WDR33),ENSBGRG00000004274(RABGAP1L),ENSBGRG00000004626(CBLB),ENSBGRG00000005235(TENT2),ENSBGRG00000005343(ENSBGRG00000005343),ENSBGRG00000005379(ATG5),ENSBGRG00000005984(CSNK1D),ENSBGRG00000006060(IGF1R),ENSBGRG00000006248(PIKFYVE),ENSBGRG0000000…
BP	GO:0034695	response to prostaglandin E	5	13	ENSBGRG00000000593(PRKAA2),ENSBGRG00000000673(ADCY6),ENSBGRG00000001978(TGFBR3),ENSBGRG00000008823(P2RY4),ENSBGRG00000014792(ACACA)	0.0040274	0.151079		ko05163	Human cytomegalovirus infection	Human Diseases	Infectious disease: viral	14	189	ENSBGRG00000018786(PTGS2),ENSBGRG00000005672(SRC),ENSBGRG00000024291(PTGER4),ENSBGRG00000022326(TRAF5),ENSBGRG00000017283(FAS),ENSBGRG00000010257(STAT3),ENSBGRG00000007038(FASLG),ENSBGRG00000023559(PRKACA),ENSBGRG00000001167(PRKACB),ENSBGRG00000000673(ADCY6),ENSBGRG00000020100(RB1),ENSBGRG00000009042(RIPK1),ENSBGRG00000018824(CXCL12),ENSBGRG00000002633(PPP3CA)	0.766518	0.988982		BP	GO:0014733	regulation of skeletal muscle adaptation	2	13	0.00894219	0.203302	ENSBGRG00000008351(MYH7),ENSBGRG00000010412(ATP2A2)
BP	GO:0034661	ncRNA catabolic process	7	24	ENSBGRG00000004803(LIN28B),ENSBGRG00000005621(TRIR),ENSBGRG00000006587(EXOSC9),ENSBGRG00000011128(EXOSC10),ENSBGRG00000019933(DIS3L2),ENSBGRG00000023300(SND1),ENSBGRG00000026089(PARN)	0.00407735	0.1514		ko00510	N-Glycan biosynthesis	Metabolism	Glycan biosynthesis and metabolism	3	46	ENSBGRG00000012141(MGAT5B),ENSBGRG00000009304(MAN1A1),ENSBGRG00000000203(DDOST)	0.772269	0.988982		BP	GO:0046011	regulation of oskar mRNA translation	2	13	0.00894219	0.203302	ENSBGRG00000004149(PTBP3),ENSBGRG00000021677(SYNCRIP)
BP	GO:2000406	positive regulation of T cell migration	7	24	ENSBGRG00000010021(CCL20),ENSBGRG00000010308(ADAM10),ENSBGRG00000015313(ADAM8),ENSBGRG00000017585(WNK1),ENSBGRG00000018824(CXCL12),ENSBGRG00000021608(SELENOK),ENSBGRG00000022744(PYCARD)	0.00407735	0.1514		ko04071	Sphingolipid signaling pathway	Environmental Information Processing	Signal transduction	7	101	ENSBGRG00000009888(DEGS1),ENSBGRG00000004770(CERS3),ENSBGRG00000009912(PPP2R1B),ENSBGRG00000000977(CERS1),ENSBGRG00000013226(PPP2R2C),ENSBGRG00000009715(SPTLC3),ENSBGRG00000021104(DEGS2)	0.781384	0.988982		BP	GO:0007264	small GTPase mediated signal transduction	13	550	0.00894544	0.203302	ENSBGRG00000001141(ABCA1),ENSBGRG00000001896(DENND4C),ENSBGRG00000004086(DENND5B),ENSBGRG00000006051(CDC42BPA),ENSBGRG00000007061(RRAS2),ENSBGRG00000011309(ARHGAP18),ENSBGRG00000013023(RAPGEF1),ENSBGRG00000016018(ABR),ENSBGRG00000017494(DOCK11),ENSBGRG00000018618(DOCK7),ENSBGRG00000022862(DOCK9),ENSBGRG00000022891(RAF1),ENSBGRG00000024953(DENND4A)
BP	GO:1903039	positive regulation of leukocyte cell-cell adhesion	24	151	ENSBGRG00000000461(NR4A3),ENSBGRG00000001078(WNT10B),ENSBGRG00000002134(CAV1),ENSBGRG00000002633(PPP3CA),ENSBGRG00000006267(PDCD1LG2),ENSBGRG00000006751(SLC7A1),ENSBGRG00000007174(FOXO3),ENSBGRG00000008403(SOX13),ENSBGRG00000008735(FUT7),ENSBGRG00000012246(ICOS),ENSBGRG00000012573(NCK2),ENSBGRG00000013085(EGR3),ENSBGRG00000015126(DNAJA3),ENSBGRG00000015313(ADAM8),ENSBGRG00000016956(IL12B),ENSBGRG…	0.00412424	0.152368		ko04668	TNF signaling pathway	Environmental Information Processing	Signal transduction	7	101	ENSBGRG00000009042(RIPK1),ENSBGRG00000010021(CCL20),ENSBGRG00000017283(FAS),ENSBGRG00000018711(MMP3),ENSBGRG00000022326(TRAF5),ENSBGRG00000010905(VEGFD),ENSBGRG00000018786(PTGS2)	0.781384	0.988982		BP	GO:0048640	negative regulation of developmental growth	7	208	0.00896069	0.203302	ENSBGRG00000001761(IFRD1),ENSBGRG00000002944(TOMM70),ENSBGRG00000003960(ENAH),ENSBGRG00000006060(IGF1R),ENSBGRG00000016568(ACSL3),ENSBGRG00000021677(SYNCRIP),ENSBGRG00000024593(TGFBR2)
BP	GO:0006810	transport	294	2866	ENSBGRG00000000082(GRIK1),ENSBGRG00000000197(EPHA3),ENSBGRG00000000213(NFE2L2),ENSBGRG00000000250(ATP13A5),ENSBGRG00000000351(EEPD1),ENSBGRG00000000405(MFSD2A),ENSBGRG00000000461(NR4A3),ENSBGRG00000000764(CDKN1B),ENSBGRG00000000785(DDX39A),ENSBGRG00000000798(GABRG2),ENSBGRG00000000918(STK36),ENSBGRG00000001004(VDAC1),ENSBGRG00000001111(C9orf72),ENSBGRG00000001150(PRKAG1),ENSBGRG00000001317(SLC25A…	0.00420797	0.15468		ko04216	Ferroptosis	Cellular Processes	Cell growth and death	3	47	ENSBGRG00000008772(GSS),ENSBGRG00000025402(ALOX15),ENSBGRG00000003645(SLC40A1)	0.784809	0.988982		MF	GO:0042910	xenobiotic transmembrane transporter activity	2	13	0.00931428	0.118671	ENSBGRG00000020672(ABCG2),ENSBGRG00000023586(ABCC1)
BP	GO:0018209	peptidyl-serine modification	29	194	ENSBGRG00000000428(ATR),ENSBGRG00000002134(CAV1),ENSBGRG00000004372(NTRK2),ENSBGRG00000005223(PARP1),ENSBGRG00000005984(CSNK1D),ENSBGRG00000007271(GALNT16),ENSBGRG00000009042(RIPK1),ENSBGRG00000011397(AURKA),ENSBGRG00000011775(NOS1),ENSBGRG00000011880(MLXIPL),ENSBGRG00000012141(MGAT5B),ENSBGRG00000012192(NTRK3),ENSBGRG00000012573(NCK2),ENSBGRG00000014113(ATM),ENSBGRG00000014122(PWP1),ENSBGRG00000…	0.00433624	0.158598		ko00053	Ascorbate and aldarate metabolism	Metabolism	Carbohydrate metabolism	1	17	ENSBGRG00000011055	0.785232	0.988982		BP	GO:0043403	skeletal muscle tissue regeneration	3	39	0.00934845	0.20648	ENSBGRG00000001761(IFRD1),ENSBGRG00000022578(CFLAR),ENSBGRG00000024593(TGFBR2)
MF	GO:0071813	lipoprotein particle binding	6	19	ENSBGRG00000003668(APOA1),ENSBGRG00000005861(LDLR),ENSBGRG00000012214(SCARB1),ENSBGRG00000012746(CRP),ENSBGRG00000019666(PLTP),ENSBGRG00000023541	0.0045202	0.192385		ko00061	Fatty acid biosynthesis	Metabolism	Lipid metabolism	1	17	ENSBGRG00000014792(ACACA)	0.785232	0.988982		BP	GO:0030902	hindbrain development	7	210	0.00941606	0.20648	ENSBGRG00000006060(IGF1R),ENSBGRG00000007622(SMAD1),ENSBGRG00000009216(BRWD1),ENSBGRG00000012463(RERE),ENSBGRG00000020312(CPLANE1),ENSBGRG00000024536(BMP5),ENSBGRG00000026591(ENSBGRG00000026591)
MF	GO:0071814	protein-lipid complex binding	6	19	ENSBGRG00000003668(APOA1),ENSBGRG00000005861(LDLR),ENSBGRG00000012214(SCARB1),ENSBGRG00000012746(CRP),ENSBGRG00000019666(PLTP),ENSBGRG00000023541	0.0045202	0.192385		ko04080	Neuroactive ligand-receptor interaction	Environmental Information Processing	Signaling molecules and interaction	24	318	ENSBGRG00000020983(GRIA4),ENSBGRG00000023482(GALR1),ENSBGRG00000023249(LEP),ENSBGRG00000026245(NPFFR2),ENSBGRG00000010547(NMB),ENSBGRG00000000082(GRIK1),ENSBGRG00000010593(PDYN),ENSBGRG00000005614(LYPD6),ENSBGRG00000018073(CHRND),ENSBGRG00000010102(P2RX7),ENSBGRG00000000798(GABRG2),ENSBGRG00000005696,ENSBGRG00000002227(LPAR2),ENSBGRG00000016011(MTNR1A),ENSBGRG00000010476(GRIA3),ENSBGRG00000015840…	0.789183	0.988982		BP	GO:0048193	Golgi vesicle transport	10	374	0.0094759	0.20648	ENSBGRG00000000266(PROS1),ENSBGRG00000001484(SEC24B),ENSBGRG00000001896(DENND4C),ENSBGRG00000003783(SPTB),ENSBGRG00000005343(ENSBGRG00000005343),ENSBGRG00000005984(CSNK1D),ENSBGRG00000015284(SPTBN1),ENSBGRG00000016568(ACSL3),ENSBGRG00000016974(NBEA),ENSBGRG00000024953(DENND4A)
BP	GO:0032989	cellular component morphogenesis	55	430	ENSBGRG00000000405(MFSD2A),ENSBGRG00000000520(DPYSL2),ENSBGRG00000000770(ECE1),ENSBGRG00000000909(FSTL4),ENSBGRG00000001111(C9orf72),ENSBGRG00000001761(IFRD1),ENSBGRG00000001923(GAP43),ENSBGRG00000002594(GLI2),ENSBGRG00000002633(PPP3CA),ENSBGRG00000003262(TMEM106B),ENSBGRG00000004157(UGT8),ENSBGRG00000004203(SEMA7A),ENSBGRG00000005119(TTC8),ENSBGRG00000005329(OTX2),ENSBGRG00000005332(STXBP1),ENSB…	0.00456134	0.165455		ko00760	Nicotinate and nicotinamide metabolism	Metabolism	Metabolism of cofactors and vitamins	2	33	ENSBGRG00000012459(NMNAT2),ENSBGRG00000020016(NUDT12)	0.791853	0.988982		BP	GO:0040025	vulval development	6	161	0.00950695	0.20648	ENSBGRG00000004626(CBLB),ENSBGRG00000007061(RRAS2),ENSBGRG00000012411(LRBA),ENSBGRG00000016974(NBEA),ENSBGRG00000020282(SMARCA5),ENSBGRG00000022891(RAF1)
BP	GO:0045785	positive regulation of cell adhesion	40	292	ENSBGRG00000000461(NR4A3),ENSBGRG00000001078(WNT10B),ENSBGRG00000002134(CAV1),ENSBGRG00000002536(EPB41L4B),ENSBGRG00000002633(PPP3CA),ENSBGRG00000003668(APOA1),ENSBGRG00000006267(PDCD1LG2),ENSBGRG00000006423(MYOC),ENSBGRG00000006751(SLC7A1),ENSBGRG00000007174(FOXO3),ENSBGRG00000008403(SOX13),ENSBGRG00000008735(FUT7),ENSBGRG00000010677(VIT),ENSBGRG00000011222(CASS4),ENSBGRG00000012246(ICOS),ENSBGR…	0.00458465	0.165455		ko04015	Rap1 signaling pathway	Environmental Information Processing	Signal transduction	14	193	ENSBGRG00000002227(LPAR2),ENSBGRG00000015132(RASSF5),ENSBGRG00000005672(SRC),ENSBGRG00000013093(FGF7),ENSBGRG00000017575(FGFR3),ENSBGRG00000006109(FLT4),ENSBGRG00000010536(FGF2),ENSBGRG00000000673(ADCY6),ENSBGRG00000013023(RAPGEF1),ENSBGRG00000010905(VEGFD),ENSBGRG00000004554(VAV2),ENSBGRG00000020676(CSF1R),ENSBGRG00000023500(NGFR),ENSBGRG00000021202(SKAP1)	0.792353	0.988982		BP	GO:0019538	protein metabolic process	81	5853	0.00960157	0.20648	ENSBGRG00000000262(BOLL),ENSBGRG00000000266(PROS1),ENSBGRG00000000629(GNPTAB),ENSBGRG00000001141(ABCA1),ENSBGRG00000002321(FBXO42),ENSBGRG00000002518(DDR2),ENSBGRG00000002824(USP33),ENSBGRG00000003783(SPTB),ENSBGRG00000004149(PTBP3),ENSBGRG00000004461(LRRK1),ENSBGRG00000004626(CBLB),ENSBGRG00000005379(ATG5),ENSBGRG00000005459(PRDM5),ENSBGRG00000005984(CSNK1D),ENSBGRG00000006051(CDC42BPA),ENSBGRG0…
BP	GO:0006139	nucleobase-containing compound metabolic process	375	3737	ENSBGRG00000000004(VGLL3),ENSBGRG00000000061(GABPA),ENSBGRG00000000074(N6AMT1),ENSBGRG00000000213(NFE2L2),ENSBGRG00000000235,ENSBGRG00000000283(HP1BP3),ENSBGRG00000000285(CIART),ENSBGRG00000000351(EEPD1),ENSBGRG00000000440(PYM1),ENSBGRG00000000461(NR4A3),ENSBGRG00000000535,ENSBGRG00000000542(CRTC1),ENSBGRG00000000645(GMNC),ENSBGRG00000000673(ADCY6),ENSBGRG00000000726(PPIE),ENSBGRG00000000764(CDKN…	0.00459156	0.165455		ko04714	Thermogenesis	Organismal Systems	Environmental adaptation	16	219	ENSBGRG00000016630(PRKAB1),ENSBGRG00000010942(PRKAB2),ENSBGRG00000010730(NDUFA6),ENSBGRG00000008576,ENSBGRG00000014262(PPARGC1A),ENSBGRG00000001150(PRKAG1),ENSBGRG00000024995,ENSBGRG00000000593(PRKAA2),ENSBGRG00000000673(ADCY6),ENSBGRG00000023559(PRKACA),ENSBGRG00000001167(PRKACB),ENSBGRG00000004107(SMARCA2),ENSBGRG00000012730(NDUFA8),ENSBGRG00000016172(PNPLA3),ENSBGRG00000003905(KDM3B),ENSBGRG00…	0.795911	0.988982		BP	GO:1905475	regulation of protein localization to membrane	7	211	0.00965	0.20648	ENSBGRG00000001896(DENND4C),ENSBGRG00000009140(PRKCH),ENSBGRG00000015284(SPTBN1),ENSBGRG00000016568(ACSL3),ENSBGRG00000020056(DLG1),ENSBGRG00000024679(PICALM),ENSBGRG00000024953(DENND4A)
MF	GO:0004672	protein kinase activity	62	507	ENSBGRG00000000197(EPHA3),ENSBGRG00000000428(ATR),ENSBGRG00000000593(PRKAA2),ENSBGRG00000000918(STK36),ENSBGRG00000001150(PRKAG1),ENSBGRG00000001167(PRKACB),ENSBGRG00000001329(STK17B),ENSBGRG00000001473(GUCY2C),ENSBGRG00000001978(TGFBR3),ENSBGRG00000002568(MAP3K2),ENSBGRG00000004372(NTRK2),ENSBGRG00000004732(AAK1),ENSBGRG00000004989(ACVR2A),ENSBGRG00000005369(FLT3),ENSBGRG00000005672(SRC),ENSBGRG…	0.00462147	0.192385		ko04911	Insulin secretion	Organismal Systems	Endocrine system	5	76	ENSBGRG00000021420(CAMK2A),ENSBGRG00000018578(KCNMB1),ENSBGRG00000023559(PRKACA),ENSBGRG00000001167(PRKACB),ENSBGRG00000000673(ADCY6)	0.797767	0.988982		BP	GO:1905037	autophagosome organization	5	116	0.00977075	0.20648	ENSBGRG00000005379(ATG5),ENSBGRG00000006060(IGF1R),ENSBGRG00000006248(PIKFYVE),ENSBGRG00000021132(VMP1),ENSBGRG00000021365(PIK3C3)
BP	GO:0031349	positive regulation of defense response	27	178	ENSBGRG00000001666(CASP6),ENSBGRG00000002486(XRCC5),ENSBGRG00000002944(TOMM70),ENSBGRG00000003405(NOD1),ENSBGRG00000004407(TAFA3),ENSBGRG00000005861(LDLR),ENSBGRG00000006153(FCN1),ENSBGRG00000009042(RIPK1),ENSBGRG00000010257(STAT3),ENSBGRG00000010376(SLC15A4),ENSBGRG00000011045(LSM14A),ENSBGRG00000012275(DHX58),ENSBGRG00000015313(ADAM8),ENSBGRG00000015363(CRTAM),ENSBGRG00000016821(TRIM62),ENSBGRG…	0.00473243	0.168244		ko04970	Salivary secretion	Organismal Systems	Digestive system	5	76	ENSBGRG00000023368,ENSBGRG00000011775(NOS1),ENSBGRG00000001167(PRKACB),ENSBGRG00000023559(PRKACA),ENSBGRG00000000673(ADCY6)	0.797767	0.988982		BP	GO:0048738	cardiac muscle tissue development	8	264	0.00977737	0.20648	ENSBGRG00000002944(TOMM70),ENSBGRG00000005379(ATG5),ENSBGRG00000007622(SMAD1),ENSBGRG00000007922(MYH6),ENSBGRG00000008351(MYH7),ENSBGRG00000013584(NOX4),ENSBGRG00000024536(BMP5),ENSBGRG00000024593(TGFBR2)
BP	GO:0048736	appendage development	22	136	ENSBGRG00000000770(ECE1),ENSBGRG00000001195(SP8),ENSBGRG00000002594(GLI2),ENSBGRG00000003766(HOXC13),ENSBGRG00000004042(OSR2),ENSBGRG00000007688(FZD6),ENSBGRG00000007997(SMOC1),ENSBGRG00000010314(RARB),ENSBGRG00000010388(MSX1),ENSBGRG00000010970(ITGA6),ENSBGRG00000013013(MAP3K20),ENSBGRG00000014068(MKS1),ENSBGRG00000016038(ATRX),ENSBGRG00000016979(HOXD10),ENSBGRG00000017354(BMPR2),ENSBGRG00000018…	0.00473797	0.168244		ko00360	Phenylalanine metabolism	Metabolism	Amino acid metabolism	1	18	ENSBGRG00000013578	0.803835	0.988982		MF	GO:0008144	drug binding	14	608	0.00987593	0.118671	ENSBGRG00000001141(ABCA1),ENSBGRG00000006051(CDC42BPA),ENSBGRG00000006060(IGF1R),ENSBGRG00000008351(MYH7),ENSBGRG00000008463(TLK1),ENSBGRG00000010412(ATP2A2),ENSBGRG00000011586(ERCC6),ENSBGRG00000013584(NOX4),ENSBGRG00000014876(ATP7B),ENSBGRG00000015847(PDS5B),ENSBGRG00000020282(SMARCA5),ENSBGRG00000020672(ABCG2),ENSBGRG00000022891(RAF1),ENSBGRG00000023586(ABCC1)
BP	GO:0060173	limb development	22	136	ENSBGRG00000000770(ECE1),ENSBGRG00000001195(SP8),ENSBGRG00000002594(GLI2),ENSBGRG00000003766(HOXC13),ENSBGRG00000004042(OSR2),ENSBGRG00000007688(FZD6),ENSBGRG00000007997(SMOC1),ENSBGRG00000010314(RARB),ENSBGRG00000010388(MSX1),ENSBGRG00000010970(ITGA6),ENSBGRG00000013013(MAP3K20),ENSBGRG00000014068(MKS1),ENSBGRG00000016038(ATRX),ENSBGRG00000016979(HOXD10),ENSBGRG00000017354(BMPR2),ENSBGRG00000018…	0.00473797	0.168244		ko00512	Mucin type O-glycan biosynthesis	Metabolism	Glycan biosynthesis and metabolism	2	34	ENSBGRG00000007271(GALNT16),ENSBGRG00000011272(ST6GALNAC1)	0.805532	0.988982		BP	GO:0008064	regulation of actin polymerization or depolymerization	7	212	0.00988816	0.20648	ENSBGRG00000003960(ENAH),ENSBGRG00000005984(CSNK1D),ENSBGRG00000008613(ENSBGRG00000008613),ENSBGRG00000009644(PPP1R9A),ENSBGRG00000011309(ARHGAP18),ENSBGRG00000020056(DLG1),ENSBGRG00000024670(LMOD2)
BP	GO:0032757	positive regulation of interleukin-8 production	10	44	ENSBGRG00000000221(F3),ENSBGRG00000003405(NOD1),ENSBGRG00000006153(FCN1),ENSBGRG00000009042(RIPK1),ENSBGRG00000010257(STAT3),ENSBGRG00000013000(NOS2),ENSBGRG00000019776(CLEC7A),ENSBGRG00000022744(PYCARD),ENSBGRG00000023249(LEP),ENSBGRG00000025440(SERPINE1)	0.00479219	0.169347		ko04215	Apoptosis - multiple species	Cellular Processes	Cell growth and death	2	34	ENSBGRG00000016285,ENSBGRG00000023500(NGFR)	0.805532	0.988982		CC	GO:0071683	sensory dendrite	2	14	0.00990482	0.238351	ENSBGRG00000011855(ATP8B1),ENSBGRG00000012550(ATP8B4)
BP	GO:0050886	endocrine process	11	51	ENSBGRG00000000770(ECE1),ENSBGRG00000003951(AQP1),ENSBGRG00000008588(REN),ENSBGRG00000011584(ACE2),ENSBGRG00000015409(CRY1),ENSBGRG00000018911(RAB11FIP1),ENSBGRG00000019832(C1QTNF1),ENSBGRG00000023043(RASL10B),ENSBGRG00000023482(GALR1),ENSBGRG00000024537(SMAD4),ENSBGRG00000025055(SELENOM)	0.00484227	0.170294		ko00350	Tyrosine metabolism	Metabolism	Amino acid metabolism	2	34	ENSBGRG00000018043(TPO),ENSBGRG00000013578	0.805532	0.988982		BP	GO:0050775	positive regulation of dendrite morphogenesis	4	75	0.00991503	0.20648	ENSBGRG00000007622(SMAD1),ENSBGRG00000011253(EHMT1),ENSBGRG00000012799(FBXW8),ENSBGRG00000024381(EEF2K)
BP	GO:1902475	L-alpha-amino acid transmembrane transport	8	31	ENSBGRG00000005554(SLC43A1),ENSBGRG00000006751(SLC7A1),ENSBGRG00000008855(CLN8),ENSBGRG00000010376(SLC15A4),ENSBGRG00000011584(ACE2),ENSBGRG00000016741(SLC1A6),ENSBGRG00000017235(SLC38A5),ENSBGRG00000020657(EPM2A)	0.00498788	0.174576		ko00630	Glyoxylate and dicarboxylate metabolism	Metabolism	Carbohydrate metabolism	2	34	ENSBGRG00000008277(ACSS1),ENSBGRG00000002491	0.805532	0.988982		BP	GO:0033275	actin-myosin filament sliding	3	40	0.0100247	0.20648	ENSBGRG00000004749(MYL1),ENSBGRG00000007922(MYH6),ENSBGRG00000008351(MYH7)
BP	GO:0060548	negative regulation of cell death	75	623	ENSBGRG00000000213(NFE2L2),ENSBGRG00000000593(PRKAA2),ENSBGRG00000000764(CDKN1B),ENSBGRG00000000962(MCL1),ENSBGRG00000001004(VDAC1),ENSBGRG00000001451(CHMP5),ENSBGRG00000001756(NUGGC),ENSBGRG00000002134(CAV1),ENSBGRG00000002594(GLI2),ENSBGRG00000002683(IL13),ENSBGRG00000003000(RASA1),ENSBGRG00000003951(AQP1),ENSBGRG00000004273(PYCR1),ENSBGRG00000004372(NTRK2),ENSBGRG00000004564(ZNF385A),ENSBGRG00…	0.00506213	0.176331		ko05211	Renal cell carcinoma	Human Diseases	Cancer: specific types	4	63	ENSBGRG00000009029(EGLN3),ENSBGRG00000022496(ARNT2),ENSBGRG00000013023(RAPGEF1),ENSBGRG00000011285(PAK5)	0.805808	0.988982		BP	GO:0015748	organophosphate ester transport	5	117	0.010117	0.20648	ENSBGRG00000001141(ABCA1),ENSBGRG00000011855(ATP8B1),ENSBGRG00000012550(ATP8B4),ENSBGRG00000021443(ANO6),ENSBGRG00000023586(ABCC1)
CC	GO:0005886	plasma membrane	260	2524	ENSBGRG00000000082(GRIK1),ENSBGRG00000000131(IFNAR2),ENSBGRG00000000197(EPHA3),ENSBGRG00000000213(NFE2L2),ENSBGRG00000000351(EEPD1),ENSBGRG00000000405(MFSD2A),ENSBGRG00000000520(DPYSL2),ENSBGRG00000000542(CRTC1),ENSBGRG00000000673(ADCY6),ENSBGRG00000000711(METAP2),ENSBGRG00000000770(ECE1),ENSBGRG00000000798(GABRG2),ENSBGRG00000001004(VDAC1),ENSBGRG00000001070(ATXN10),ENSBGRG00000001347(LMBR1L),EN…	0.00507563	0.241092		ko00564	Glycerophospholipid metabolism	Metabolism	Lipid metabolism	6	91	ENSBGRG00000005175,ENSBGRG00000005071,ENSBGRG00000011798(CHAT),ENSBGRG00000025554(DGKK),ENSBGRG00000020412(PLD3),ENSBGRG00000003271(CEPT1)	0.810032	0.988982		BP	GO:0065009	regulation of molecular function	52	3442	0.010124	0.20648	ENSBGRG00000000266(PROS1),ENSBGRG00000000599(ENSBGRG00000000599),ENSBGRG00000000973(FGD6),ENSBGRG00000001761(IFRD1),ENSBGRG00000001896(DENND4C),ENSBGRG00000002158(HMBOX1),ENSBGRG00000002518(DDR2),ENSBGRG00000002824(USP33),ENSBGRG00000003783(SPTB),ENSBGRG00000004086(DENND5B),ENSBGRG00000004274(RABGAP1L),ENSBGRG00000004575(SERINC5),ENSBGRG00000004626(CBLB),ENSBGRG00000005231(NIBAN2),ENSBGRG00000005…
BP	GO:0061564	axon development	38	276	ENSBGRG00000000520(DPYSL2),ENSBGRG00000000770(ECE1),ENSBGRG00000000909(FSTL4),ENSBGRG00000001111(C9orf72),ENSBGRG00000001761(IFRD1),ENSBGRG00000001923(GAP43),ENSBGRG00000002594(GLI2),ENSBGRG00000004203(SEMA7A),ENSBGRG00000005119(TTC8),ENSBGRG00000005329(OTX2),ENSBGRG00000005332(STXBP1),ENSBGRG00000005442(CYFIP1),ENSBGRG00000006057(RND2),ENSBGRG00000007842(KLF7),ENSBGRG00000008697(KEL),ENSBGRG0000…	0.00517423	0.178715		ko05034	Alcoholism	Human Diseases	Substance dependence	11	158	ENSBGRG00000001167(PRKACB),ENSBGRG00000023559(PRKACA),ENSBGRG00000004281(HDAC5),ENSBGRG00000005168,ENSBGRG00000010593(PDYN),ENSBGRG00000017843(H2AZ2),ENSBGRG00000022164(FOSB),ENSBGRG00000004372(NTRK2),ENSBGRG00000013578,ENSBGRG00000002796(HDAC10),ENSBGRG00000019173(SLC18A2)	0.815064	0.988982		BP	GO:0007265	Ras protein signal transduction	11	437	0.0101835	0.20648	ENSBGRG00000001141(ABCA1),ENSBGRG00000001896(DENND4C),ENSBGRG00000004086(DENND5B),ENSBGRG00000007061(RRAS2),ENSBGRG00000013023(RAPGEF1),ENSBGRG00000016018(ABR),ENSBGRG00000017494(DOCK11),ENSBGRG00000018618(DOCK7),ENSBGRG00000022862(DOCK9),ENSBGRG00000022891(RAF1),ENSBGRG00000024953(DENND4A)
BP	GO:0048839	inner ear development	22	137	ENSBGRG00000000682(CECR2),ENSBGRG00000000764(CDKN1B),ENSBGRG00000002594(GLI2),ENSBGRG00000004859(USH2A),ENSBGRG00000005119(TTC8),ENSBGRG00000005559(ATP6V1B1),ENSBGRG00000006002(JAG2),ENSBGRG00000007688(FZD6),ENSBGRG00000008619(SIX1),ENSBGRG00000010308(ADAM10),ENSBGRG00000010536(FGF2),ENSBGRG00000010766(INSIG1),ENSBGRG00000012559(DVL1),ENSBGRG00000012866(LRIG1),ENSBGRG00000012869(EYA1),ENSBGRG0000…	0.00517945	0.178715		ko05214	Glioma	Human Diseases	Cancer: specific types	4	64	ENSBGRG00000005168,ENSBGRG00000021420(CAMK2A),ENSBGRG00000020100(RB1),ENSBGRG00000019275(PLCG2)	0.815597	0.988982		BP	GO:0050807	regulation of synapse organization	10	379	0.0103388	0.20648	ENSBGRG00000003960(ENAH),ENSBGRG00000006060(IGF1R),ENSBGRG00000008613(ENSBGRG00000008613),ENSBGRG00000009644(PPP1R9A),ENSBGRG00000015284(SPTBN1),ENSBGRG00000016568(ACSL3),ENSBGRG00000021677(SYNCRIP),ENSBGRG00000024381(EEF2K),ENSBGRG00000024536(BMP5),ENSBGRG00000024679(PICALM)
MF	GO:0035004	phosphatidylinositol 3-kinase activity	4	9	ENSBGRG00000007268(PIK3CG),ENSBGRG00000014113(ATM),ENSBGRG00000021365(PIK3C3),ENSBGRG00000026668(PIK3R6)	0.00520179	0.202665		ko05416	Viral myocarditis	Human Diseases	Cardiovascular disease	4	64	ENSBGRG00000000420(EIF4G3),ENSBGRG00000002134(CAV1),ENSBGRG00000022452,ENSBGRG00000009260	0.815597	0.988982		BP	GO:0046903	secretion	32	1887	0.0103504	0.20648	ENSBGRG00000000266(PROS1),ENSBGRG00000000629(GNPTAB),ENSBGRG00000001141(ABCA1),ENSBGRG00000001728(ITPR2),ENSBGRG00000001896(DENND4C),ENSBGRG00000005231(NIBAN2),ENSBGRG00000005379(ATG5),ENSBGRG00000005984(CSNK1D),ENSBGRG00000008227(UBR5),ENSBGRG00000008434(UBE2Q1),ENSBGRG00000009140(PRKCH),ENSBGRG00000009644(PPP1R9A),ENSBGRG00000010412(ATP2A2),ENSBGRG00000010530(SLC26A7),ENSBGRG00000012550(ATP8B4)…
MF	GO:0052742	phosphatidylinositol kinase activity	4	9	ENSBGRG00000007268(PIK3CG),ENSBGRG00000014113(ATM),ENSBGRG00000018890(PI4K2A),ENSBGRG00000021365(PIK3C3)	0.00520179	0.202665		ko04666	Fc gamma R-mediated phagocytosis	Organismal Systems	Immune system	5	78	ENSBGRG00000003534(ACTR3),ENSBGRG00000020569(MYO10),ENSBGRG00000019275(PLCG2),ENSBGRG00000009260,ENSBGRG00000004554(VAV2)	0.815915	0.988982		BP	GO:0010452	histone H3-K36 methylation	2	14	0.0103564	0.20648	ENSBGRG00000016971(NSD3),ENSBGRG00000019016(SETD3)
MF	GO:0030169	low-density lipoprotein particle binding	5	14	ENSBGRG00000005861(LDLR),ENSBGRG00000012214(SCARB1),ENSBGRG00000012746(CRP),ENSBGRG00000019666(PLTP),ENSBGRG00000023541	0.00528569	0.202665		ko00190	Oxidative phosphorylation	Metabolism	Energy metabolism	9	133	ENSBGRG00000024995,ENSBGRG00000005559(ATP6V1B1),ENSBGRG00000008576,ENSBGRG00000009889(ATP6V0A1),ENSBGRG00000010730(NDUFA6),ENSBGRG00000017325(ATP4B),ENSBGRG00000024848,ENSBGRG00000001479(ATP6V1A),ENSBGRG00000012730(NDUFA8)	0.823384	0.988982		BP	GO:0007033	vacuole organization	7	214	0.0103773	0.20648	ENSBGRG00000000629(GNPTAB),ENSBGRG00000001141(ABCA1),ENSBGRG00000005379(ATG5),ENSBGRG00000006060(IGF1R),ENSBGRG00000006248(PIKFYVE),ENSBGRG00000021132(VMP1),ENSBGRG00000021365(PIK3C3)
BP	GO:0052548	regulation of endopeptidase activity	26	171	ENSBGRG00000000221(F3),ENSBGRG00000003405(NOD1),ENSBGRG00000003951(AQP1),ENSBGRG00000005464(USP47),ENSBGRG00000005672(SRC),ENSBGRG00000005913(DAPK1),ENSBGRG00000007038(FASLG),ENSBGRG00000008014(CST7),ENSBGRG00000009029(EGLN3),ENSBGRG00000009451(HIP1),ENSBGRG00000010161(MTCH1),ENSBGRG00000010257(STAT3),ENSBGRG00000015017(SH3RF1),ENSBGRG00000016600(PDCD5),ENSBGRG00000017283(FAS),ENSBGRG00000018786(…	0.00533188	0.183111		ko04928	Parathyroid hormone synthesis, secretion and action	Organismal Systems	Endocrine system	6	93	ENSBGRG00000019628(GCM1),ENSBGRG00000012532(MMP16),ENSBGRG00000025453(RUNX2),ENSBGRG00000001167(PRKACB),ENSBGRG00000023559(PRKACA),ENSBGRG00000000673(ADCY6)	0.826089	0.988982		BP	GO:0030832	regulation of actin filament length	7	214	0.0103773	0.20648	ENSBGRG00000003960(ENAH),ENSBGRG00000005984(CSNK1D),ENSBGRG00000008613(ENSBGRG00000008613),ENSBGRG00000009644(PPP1R9A),ENSBGRG00000011309(ARHGAP18),ENSBGRG00000020056(DLG1),ENSBGRG00000024670(LMOD2)
BP	GO:0010867	positive regulation of triglyceride biosynthetic process	4	9	ENSBGRG00000000405(MFSD2A),ENSBGRG00000005861(LDLR),ENSBGRG00000011705(CNEP1R1),ENSBGRG00000012214(SCARB1)	0.00563104	0.190008		ko04973	Carbohydrate digestion and absorption	Organismal Systems	Digestive system	2	36	ENSBGRG00000011917(HK1),ENSBGRG00000004485(G6PC3)	0.83051	0.988982		CC	GO:0031461	cullin-RING ubiquitin ligase complex	7	220	0.0106115	0.238351	ENSBGRG00000002321(FBXO42),ENSBGRG00000009157(DCAF17),ENSBGRG00000012799(FBXW8),ENSBGRG00000013378(FEM1C),ENSBGRG00000019540(CACUL1),ENSBGRG00000022197(FBXL2),ENSBGRG00000026508(FBXL4)
BP	GO:0010940	positive regulation of necrotic cell death	4	9	ENSBGRG00000001666(CASP6),ENSBGRG00000009042(RIPK1),ENSBGRG00000019545(SLC6A6),ENSBGRG00000022541(MT3)	0.00563104	0.190008		ko05216	Thyroid cancer	Human Diseases	Cancer: specific types	2	36	ENSBGRG00000015485(PAX8),ENSBGRG00000025238(CCDC6)	0.83051	0.988982		BP	GO:0010720	positive regulation of cell development	17	823	0.0108481	0.20648	ENSBGRG00000002518(DDR2),ENSBGRG00000005231(NIBAN2),ENSBGRG00000005984(CSNK1D),ENSBGRG00000006060(IGF1R),ENSBGRG00000007622(SMAD1),ENSBGRG00000009140(PRKCH),ENSBGRG00000009644(PPP1R9A),ENSBGRG00000011253(EHMT1),ENSBGRG00000012799(FBXW8),ENSBGRG00000016288(MAGI2),ENSBGRG00000018952(TRAK1),ENSBGRG00000021365(PIK3C3),ENSBGRG00000022578(CFLAR),ENSBGRG00000022891(RAF1),ENSBGRG00000024381(EEF2K),ENSBGR…
BP	GO:0015801	aromatic amino acid transport	4	9	ENSBGRG00000006751(SLC7A1),ENSBGRG00000010376(SLC15A4),ENSBGRG00000011584(ACE2),ENSBGRG00000017235(SLC38A5)	0.00563104	0.190008		ko00513	Various types of N-glycan biosynthesis	Metabolism	Glycan biosynthesis and metabolism	2	36	ENSBGRG00000009304(MAN1A1),ENSBGRG00000000203(DDOST)	0.83051	0.988982		BP	GO:0051964	negative regulation of synapse assembly	4	77	0.0108518	0.20648	ENSBGRG00000003960(ENAH),ENSBGRG00000009644(PPP1R9A),ENSBGRG00000016568(ACSL3),ENSBGRG00000021677(SYNCRIP)
BP	GO:1901360	organic cyclic compound metabolic process	398	3997	ENSBGRG00000000004(VGLL3),ENSBGRG00000000061(GABPA),ENSBGRG00000000074(N6AMT1),ENSBGRG00000000213(NFE2L2),ENSBGRG00000000235,ENSBGRG00000000283(HP1BP3),ENSBGRG00000000285(CIART),ENSBGRG00000000351(EEPD1),ENSBGRG00000000440(PYM1),ENSBGRG00000000461(NR4A3),ENSBGRG00000000535,ENSBGRG00000000542(CRTC1),ENSBGRG00000000645(GMNC),ENSBGRG00000000673(ADCY6),ENSBGRG00000000726(PPIE),ENSBGRG00000000764(CDKN…	0.0056366	0.190008		ko00900	Terpenoid backbone biosynthesis	Metabolism	Metabolism of terpenoids and polyketides	1	20	ENSBGRG00000004092(FNTB)	0.836352	0.988982		CC	GO:0031380	nuclear RNA-directed RNA polymerase complex	1	1	0.0109244	0.238351	ENSBGRG00000005235(TENT2)
CC	GO:0031982	vesicle	109	964	ENSBGRG00000000197(EPHA3),ENSBGRG00000000770(ECE1),ENSBGRG00000000909(FSTL4),ENSBGRG00000001111(C9orf72),ENSBGRG00000001451(CHMP5),ENSBGRG00000001479(ATP6V1A),ENSBGRG00000001627(MYO1B),ENSBGRG00000002134(CAV1),ENSBGRG00000002167(SNX13),ENSBGRG00000002227(LPAR2),ENSBGRG00000003262(TMEM106B),ENSBGRG00000003405(NOD1),ENSBGRG00000003668(APOA1),ENSBGRG00000003746(DYSF),ENSBGRG00000003951(AQP1),ENSBGRG…	0.00570751	0.256838		ko00340	Histidine metabolism	Metabolism	Amino acid metabolism	1	20	ENSBGRG00000013578	0.836352	0.988982		CC	GO:1990876	cytoplasmic side of nuclear pore	1	1	0.0109244	0.238351	ENSBGRG00000009838(NUP214)
BP	GO:0034694	response to prostaglandin	5	14	ENSBGRG00000000593(PRKAA2),ENSBGRG00000000673(ADCY6),ENSBGRG00000001978(TGFBR3),ENSBGRG00000008823(P2RY4),ENSBGRG00000014792(ACACA)	0.00580683	0.193959		ko00534	Glycosaminoglycan biosynthesis - heparan sulfate / heparin	Metabolism	Glycan biosynthesis and metabolism	1	21	ENSBGRG00000003851(HS2ST1)	0.850532	0.988982		BP	GO:0002651	positive regulation of tolerance induction to self antigen	1	1	0.0111814	0.20648	ENSBGRG00000024593(TGFBR2)
BP	GO:0090208	positive regulation of triglyceride metabolic process	5	14	ENSBGRG00000000405(MFSD2A),ENSBGRG00000005861(LDLR),ENSBGRG00000011705(CNEP1R1),ENSBGRG00000012214(SCARB1),ENSBGRG00000025849(DAGLB)	0.00580683	0.193959		ko04964	Proximal tubule bicarbonate reclamation	Organismal Systems	Excretory system	1	21	ENSBGRG00000003951(AQP1)	0.850532	0.988982		BP	GO:0007396	suture of dorsal opening	1	1	0.0111814	0.20648	ENSBGRG00000003960(ENAH)
MF	GO:0003964	RNA-directed DNA polymerase activity	3	5	ENSBGRG00000007192(TERF2),ENSBGRG00000007850(TERT),ENSBGRG00000017777(DKC1)	0.00590099	0.203477		ko00515	Mannose type O-glycan biosynthesis	Metabolism	Glycan biosynthesis and metabolism	1	21	ENSBGRG00000012141(MGAT5B)	0.850532	0.988982		BP	GO:0009646	response to absence of light	1	1	0.0111814	0.20648	ENSBGRG00000005235(TENT2)
MF	GO:0005290	L-histidine transmembrane transporter activity	3	5	ENSBGRG00000006751(SLC7A1),ENSBGRG00000010376(SLC15A4),ENSBGRG00000017235(SLC38A5)	0.00590099	0.203477		ko05208	Chemical carcinogenesis - reactive oxygen species	Human Diseases	Cancer: overview	14	204	ENSBGRG00000007174(FOXO3),ENSBGRG00000000213(NFE2L2),ENSBGRG00000012730(NDUFA8),ENSBGRG00000003295(MGST3),ENSBGRG00000022014,ENSBGRG00000001865(EPHX4),ENSBGRG00000010730(NDUFA6),ENSBGRG00000005672(SRC),ENSBGRG00000008576,ENSBGRG00000001004(VDAC1),ENSBGRG00000024995,ENSBGRG00000002112(GSTM3),ENSBGRG00000002079,ENSBGRG00000017832(CYP2E1)	0.85277	0.988982		BP	GO:0015782	CMP-N-acetylneuraminate transmembrane transport	1	1	0.0111814	0.20648	ENSBGRG00000022236(SLC35A1)
MF	GO:0016303	1-phosphatidylinositol-3-kinase activity	3	5	ENSBGRG00000007268(PIK3CG),ENSBGRG00000014113(ATM),ENSBGRG00000021365(PIK3C3)	0.00590099	0.203477		ko04930	Type II diabetes mellitus	Human Diseases	Endocrine and metabolic disease	2	39	ENSBGRG00000011917(HK1),ENSBGRG00000007753(CACNA1G)	0.862577	0.988982		BP	GO:0043520	regulation of myosin II filament assembly	1	1	0.0111814	0.20648	ENSBGRG00000004749(MYL1)
BP	GO:0016458	gene silencing	13	67	ENSBGRG00000001900(FXR1),ENSBGRG00000002633(PPP3CA),ENSBGRG00000004803(LIN28B),ENSBGRG00000005204(AJUBA),ENSBGRG00000007850(TERT),ENSBGRG00000009042(RIPK1),ENSBGRG00000009562(AGO4),ENSBGRG00000010031(PIWIL2),ENSBGRG00000010257(STAT3),ENSBGRG00000011274(DHX9),ENSBGRG00000012216(CNOT1),ENSBGRG00000013779(TNRC6C),ENSBGRG00000023300(SND1)	0.00597809	0.197872		ko04810	Regulation of actin cytoskeleton	Cellular Processes	Cell motility	13	193	ENSBGRG00000004717(ITGA5),ENSBGRG00000018824(CXCL12),ENSBGRG00000010536(FGF2),ENSBGRG00000017575(FGFR3),ENSBGRG00000005442(CYFIP1),ENSBGRG00000011285(PAK5),ENSBGRG00000002227(LPAR2),ENSBGRG00000010970(ITGA6),ENSBGRG00000005672(SRC),ENSBGRG00000013093(FGF7),ENSBGRG00000014718(PIP4K2B),ENSBGRG00000004554(VAV2),ENSBGRG00000003534(ACTR3)	0.862892	0.988982		BP	GO:0061589	calcium activated phosphatidylserine scrambling	1	1	0.0111814	0.20648	ENSBGRG00000021443(ANO6)
BP	GO:0031047	gene silencing by RNA	13	67	ENSBGRG00000001900(FXR1),ENSBGRG00000002633(PPP3CA),ENSBGRG00000004803(LIN28B),ENSBGRG00000005204(AJUBA),ENSBGRG00000007850(TERT),ENSBGRG00000009042(RIPK1),ENSBGRG00000009562(AGO4),ENSBGRG00000010031(PIWIL2),ENSBGRG00000010257(STAT3),ENSBGRG00000011274(DHX9),ENSBGRG00000012216(CNOT1),ENSBGRG00000013779(TNRC6C),ENSBGRG00000023300(SND1)	0.00597809	0.197872		ko03060	Protein export	Genetic Information Processing	Folding, sorting and degradation	1	22	ENSBGRG00000020026(HSPA5)	0.863486	0.988982		BP	GO:0071485	cellular response to absence of light	1	1	0.0111814	0.20648	ENSBGRG00000005235(TENT2)
MF	GO:0000175	3'-5'-exoribonuclease activity	6	20	ENSBGRG00000005503(REXO2),ENSBGRG00000005813(PAN3),ENSBGRG00000011128(EXOSC10),ENSBGRG00000012216(CNOT1),ENSBGRG00000019933(DIS3L2),ENSBGRG00000026089(PARN)	0.00598475	0.203477		ko04320	Dorso-ventral axis formation	Organismal Systems	Development and regeneration	1	23	ENSBGRG00000010031(PIWIL2)	0.875318	0.988982		BP	GO:0080129	proteasome core complex assembly	1	1	0.0111814	0.20648	ENSBGRG00000009216(BRWD1)
MF	GO:0000987	cis-regulatory region sequence-specific DNA binding	53	426	ENSBGRG00000000061(GABPA),ENSBGRG00000000213(NFE2L2),ENSBGRG00000000285(CIART),ENSBGRG00000001789(STAT1),ENSBGRG00000001954(ZNF395),ENSBGRG00000002538(SMAD5),ENSBGRG00000002594(GLI2),ENSBGRG00000002783(RORC),ENSBGRG00000003613(PBX3),ENSBGRG00000003739(ETS2),ENSBGRG00000004281(HDAC5),ENSBGRG00000004899(DLX3),ENSBGRG00000005329(OTX2),ENSBGRG00000005831(KLF5),ENSBGRG00000006480(SIX3),ENSBGRG00000006…	0.00600516	0.203477		ko05168	Herpes simplex virus 1 infection	Human Diseases	Infectious disease: viral	21	301	ENSBGRG00000011891(SRSF6),ENSBGRG00000004717(ITGA5),ENSBGRG00000007038(FASLG),ENSBGRG00000019082(ZNF599),ENSBGRG00000016956(IL12B),ENSBGRG00000015169(SRSF1),ENSBGRG00000016285,ENSBGRG00000000131(IFNAR2),ENSBGRG00000022452,ENSBGRG00000001789(STAT1),ENSBGRG00000013658(ZFP1),ENSBGRG00000014611,ENSBGRG00000014874,ENSBGRG00000014121,ENSBGRG00000017283(FAS),ENSBGRG00000014537,ENSBGRG00000013920(NECTIN1…	0.878095	0.988982		BP	GO:0097045	phosphatidylserine exposure on blood platelet	1	1	0.0111814	0.20648	ENSBGRG00000021443(ANO6)
BP	GO:0070542	response to fatty acid	8	32	ENSBGRG00000000593(PRKAA2),ENSBGRG00000000673(ADCY6),ENSBGRG00000001978(TGFBR3),ENSBGRG00000005861(LDLR),ENSBGRG00000007174(FOXO3),ENSBGRG00000008799(PDK4),ENSBGRG00000008823(P2RY4),ENSBGRG00000014792(ACACA)	0.00613753	0.202234		ko03320	PPAR signaling pathway	Organismal Systems	Endocrine system	4	72	ENSBGRG00000023293(SCD5),ENSBGRG00000025466(ME3),ENSBGRG00000003668(APOA1),ENSBGRG00000019666(PLTP)	0.8801	0.988982		BP	GO:0097744	urate salt excretion	1	1	0.0111814	0.20648	ENSBGRG00000020672(ABCG2)
BP	GO:0043069	negative regulation of programmed cell death	69	570	ENSBGRG00000000213(NFE2L2),ENSBGRG00000000593(PRKAA2),ENSBGRG00000000764(CDKN1B),ENSBGRG00000000962(MCL1),ENSBGRG00000001004(VDAC1),ENSBGRG00000001756(NUGGC),ENSBGRG00000002134(CAV1),ENSBGRG00000002594(GLI2),ENSBGRG00000002683(IL13),ENSBGRG00000003000(RASA1),ENSBGRG00000003951(AQP1),ENSBGRG00000004372(NTRK2),ENSBGRG00000004564(ZNF385A),ENSBGRG00000004717(ITGA5),ENSBGRG00000005332(STXBP1),ENSBGRG0…	0.00616785	0.202322		ko04150	mTOR signaling pathway	Environmental Information Processing	Signal transduction	9	143	ENSBGRG00000005559(ATP6V1B1),ENSBGRG00000001479(ATP6V1A),ENSBGRG00000001078(WNT10B),ENSBGRG00000013814(STK11),ENSBGRG00000007688(FZD6),ENSBGRG00000019557(WNT5B),ENSBGRG00000000593(PRKAA2),ENSBGRG00000024848,ENSBGRG00000012559(DVL1)	0.880644	0.988982		BP	GO:0099039	sphingolipid translocation	1	1	0.0111814	0.20648	ENSBGRG00000023586(ABCC1)
BP	GO:0090596	sensory organ morphogenesis	29	199	ENSBGRG00000000405(MFSD2A),ENSBGRG00000002594(GLI2),ENSBGRG00000003766(HOXC13),ENSBGRG00000003951(AQP1),ENSBGRG00000004042(OSR2),ENSBGRG00000004372(NTRK2),ENSBGRG00000005119(TTC8),ENSBGRG00000005255(COL5A1),ENSBGRG00000005559(ATP6V1B1),ENSBGRG00000007038(FASLG),ENSBGRG00000007688(FZD6),ENSBGRG00000008619(SIX1),ENSBGRG00000010067(GDF11),ENSBGRG00000010257(STAT3),ENSBGRG00000010314(RARB),ENSBGRG000…	0.00622749	0.20243		ko00071	Fatty acid degradation	Metabolism	Lipid metabolism	2	41	ENSBGRG00000006714(CYP2U1),ENSBGRG00000006801(HADH)	0.880762	0.988982		BP	GO:0150173	positive regulation of phosphatidylcholine metabolic process	1	1	0.0111814	0.20648	ENSBGRG00000016568(ACSL3)
BP	GO:0010641	positive regulation of platelet-derived growth factor receptor signaling pathway	3	5	ENSBGRG00000000221(F3),ENSBGRG00000005672(SRC),ENSBGRG00000009451(HIP1)	0.00628183	0.20243		ko00230	Purine metabolism	Metabolism	Nucleotide metabolism	7	116	ENSBGRG00000014307(NME7),ENSBGRG00000000673(ADCY6),ENSBGRG00000009124(RRM2B),ENSBGRG00000001473(GUCY2C),ENSBGRG00000003065(AK5),ENSBGRG00000000288(PDE11A),ENSBGRG00000007407(AK1)	0.884442	0.988982		BP	GO:1902962	regulation of metalloendopeptidase activity involved in amyloid precursor protein catabolic process	1	1	0.0111814	0.20648	ENSBGRG00000024679(PICALM)
BP	GO:0036446	myofibroblast differentiation	3	5	ENSBGRG00000006104(TP53INP1),ENSBGRG00000017884(PDCD4),ENSBGRG00000020100(RB1)	0.00628183	0.20243		ko00790	Folate biosynthesis	Metabolism	Metabolism of cofactors and vitamins	1	24	ENSBGRG00000013005	0.886127	0.988982		BP	GO:1902963	negative regulation of metalloendopeptidase activity involved in amyloid precursor protein catabolic process	1	1	0.0111814	0.20648	ENSBGRG00000024679(PICALM)
BP	GO:0072584	caveolin-mediated endocytosis	3	5	ENSBGRG00000002134(CAV1),ENSBGRG00000005672(SRC),ENSBGRG00000013434(PACSIN2)	0.00628183	0.20243		ko00601	Glycosphingolipid biosynthesis - lacto and neolacto series	Metabolism	Glycan biosynthesis and metabolism	1	24	ENSBGRG00000008735(FUT7)	0.886127	0.988982		BP	GO:1905317	inferior endocardial cushion morphogenesis	1	1	0.0111814	0.20648	ENSBGRG00000024593(TGFBR2)
CC	GO:0005730	nucleolus	73	611	ENSBGRG00000000237(AGPS),ENSBGRG00000000440(PYM1),ENSBGRG00000001422(RPAP2),ENSBGRG00000001485(NFX1),ENSBGRG00000001771(DDX46),ENSBGRG00000001789(STAT1),ENSBGRG00000002486(XRCC5),ENSBGRG00000003130(ERGIC2),ENSBGRG00000003966(DSN1),ENSBGRG00000004012(PAX9),ENSBGRG00000004803(LIN28B),ENSBGRG00000005070(ORC4),ENSBGRG00000005223(PARP1),ENSBGRG00000005503(REXO2),ENSBGRG00000005746(NOVA1),ENSBGRG000000…	0.00634383	0.271199		ko00650	Butanoate metabolism	Metabolism	Carbohydrate metabolism	1	24	ENSBGRG00000006801(HADH)	0.886127	0.988982		BP	GO:1905699	regulation of xenobiotic detoxification by transmembrane export across the plasma membrane	1	1	0.0111814	0.20648	ENSBGRG00000023586(ABCC1)
BP	GO:0042325	regulation of phosphorylation	106	935	ENSBGRG00000000764(CDKN1B),ENSBGRG00000001111(C9orf72),ENSBGRG00000001150(PRKAG1),ENSBGRG00000001845(KAT2B),ENSBGRG00000001895(ZBTB20),ENSBGRG00000002134(CAV1),ENSBGRG00000002486(XRCC5),ENSBGRG00000003096(PROK1),ENSBGRG00000003251(GLIPR2),ENSBGRG00000003405(NOD1),ENSBGRG00000003668(APOA1),ENSBGRG00000004146(RNF149),ENSBGRG00000004203(SEMA7A),ENSBGRG00000004372(NTRK2),ENSBGRG00000004544(DNAJC15),E…	0.00640731	0.204356		ko05215	Prostate cancer	Human Diseases	Cancer: specific types	5	88	ENSBGRG00000020100(RB1),ENSBGRG00000000764(CDKN1B),ENSBGRG00000002337(ETV5),ENSBGRG00000010012(AR),ENSBGRG00000018711(MMP3)	0.887887	0.988982		BP	GO:1905701	positive regulation of xenobiotic detoxification by transmembrane export across the plasma membrane	1	1	0.0111814	0.20648	ENSBGRG00000023586(ABCC1)
MF	GO:0008408	3'-5' exonuclease activity	8	33	ENSBGRG00000005503(REXO2),ENSBGRG00000005621(TRIR),ENSBGRG00000005813(PAN3),ENSBGRG00000011128(EXOSC10),ENSBGRG00000012216(CNOT1),ENSBGRG00000019933(DIS3L2),ENSBGRG00000021342(MRE11),ENSBGRG00000026089(PARN)	0.00656687	0.21594		ko00310	Lysine degradation	Metabolism	Amino acid metabolism	3	58	ENSBGRG00000006801(HADH),ENSBGRG00000019464(SUV39H1),ENSBGRG00000018734(SETDB2)	0.888417	0.988982		BP	GO:1990603	dark adaptation	1	1	0.0111814	0.20648	ENSBGRG00000005235(TENT2)
BP	GO:0071333	cellular response to glucose stimulus	11	53	ENSBGRG00000000593(PRKAA2),ENSBGRG00000001895(ZBTB20),ENSBGRG00000004306,ENSBGRG00000007178(SLC12A7),ENSBGRG00000007842(KLF7),ENSBGRG00000011880(MLXIPL),ENSBGRG00000013811(CDK16),ENSBGRG00000020463(NR1D1),ENSBGRG00000023559(PRKACA),ENSBGRG00000023716(SIN3A),ENSBGRG00000025005(CCDC186)	0.00657096	0.204356		ko05161	Hepatitis B	Human Diseases	Infectious disease: viral	9	145	ENSBGRG00000005672(SRC),ENSBGRG00000024537(SMAD4),ENSBGRG00000007038(FASLG),ENSBGRG00000010257(STAT3),ENSBGRG00000010846(STAT5A),ENSBGRG00000017283(FAS),ENSBGRG00000013085(EGR3),ENSBGRG00000001789(STAT1),ENSBGRG00000020100(RB1)	0.890051	0.988982		BP	GO:1990961	xenobiotic detoxification by transmembrane export across the plasma membrane	1	1	0.0111814	0.20648	ENSBGRG00000023586(ABCC1)
BP	GO:0002534	cytokine production involved in inflammatory response	9	39	ENSBGRG00000010257(STAT3),ENSBGRG00000013000(NOS2),ENSBGRG00000017884(PDCD4),ENSBGRG00000019180(IL17B),ENSBGRG00000019776(CLEC7A),ENSBGRG00000020412(PLD3),ENSBGRG00000021331,ENSBGRG00000022744(PYCARD),ENSBGRG00000023249(LEP)	0.00657549	0.204356		ko04621	NOD-like receptor signaling pathway	Organismal Systems	Immune system	9	145	ENSBGRG00000001004(VDAC1),ENSBGRG00000022326(TRAF5),ENSBGRG00000009042(RIPK1),ENSBGRG00000001789(STAT1),ENSBGRG00000010102(P2RX7),ENSBGRG00000022744(PYCARD),ENSBGRG00000003405(NOD1),ENSBGRG00000000131(IFNAR2),ENSBGRG00000016285	0.890051	0.988982		BP	GO:2000626	negative regulation of miRNA catabolic process	1	1	0.0111814	0.20648	ENSBGRG00000005235(TENT2)
BP	GO:0006835	dicarboxylic acid transport	9	39	ENSBGRG00000002454(LRRC8D),ENSBGRG00000004372(NTRK2),ENSBGRG00000007419(SLC25A32),ENSBGRG00000008855(CLN8),ENSBGRG00000010102(P2RX7),ENSBGRG00000016741(SLC1A6),ENSBGRG00000020657(EPM2A),ENSBGRG00000021961(SLC13A3),ENSBGRG00000024776(SLC13A2)	0.00657549	0.204356		ko04670	Leukocyte transendothelial migration	Organismal Systems	Immune system	6	103	ENSBGRG00000004554(VAV2),ENSBGRG00000003111(CLDN14),ENSBGRG00000015132(RASSF5),ENSBGRG00000019275(PLCG2),ENSBGRG00000024118(JAM3),ENSBGRG00000018824(CXCL12)	0.890772	0.988982		BP	GO:2001247	positive regulation of phosphatidylcholine biosynthetic process	1	1	0.0111814	0.20648	ENSBGRG00000016568(ACSL3)
BP	GO:1900015	regulation of cytokine production involved in inflammatory response	9	39	ENSBGRG00000010257(STAT3),ENSBGRG00000013000(NOS2),ENSBGRG00000017884(PDCD4),ENSBGRG00000019180(IL17B),ENSBGRG00000019776(CLEC7A),ENSBGRG00000020412(PLD3),ENSBGRG00000021331,ENSBGRG00000022744(PYCARD),ENSBGRG00000023249(LEP)	0.00657549	0.204356		ko05135	Yersinia infection	Human Diseases	Infectious disease: bacterial	8	132	ENSBGRG00000005672(SRC),ENSBGRG00000003534(ACTR3),ENSBGRG00000004554(VAV2),ENSBGRG00000026463(GIT2),ENSBGRG00000009260,ENSBGRG00000022744(PYCARD),ENSBGRG00000004717(ITGA5),ENSBGRG00000018381	0.89413	0.988982		BP	GO:0065008	regulation of biological quality	65	4528	0.0112355	0.20648	ENSBGRG00000000262(BOLL),ENSBGRG00000000266(PROS1),ENSBGRG00000000973(FGD6),ENSBGRG00000001023(TBXAS1),ENSBGRG00000001141(ABCA1),ENSBGRG00000001728(ITPR2),ENSBGRG00000001761(IFRD1),ENSBGRG00000002158(HMBOX1),ENSBGRG00000002824(USP33),ENSBGRG00000003960(ENAH),ENSBGRG00000004461(LRRK1),ENSBGRG00000004626(CBLB),ENSBGRG00000005231(NIBAN2),ENSBGRG00000005235(TENT2),ENSBGRG00000005343(ENSBGRG0000000534…
BP	GO:2001239	regulation of extrinsic apoptotic signaling pathway in absence of ligand	7	26	ENSBGRG00000000962(MCL1),ENSBGRG00000007498(ZC3HC1),ENSBGRG00000007850(TERT),ENSBGRG00000009042(RIPK1),ENSBGRG00000009912(PPP2R1B),ENSBGRG00000012869(EYA1),ENSBGRG00000023016(MAPK7)	0.0066142	0.204356		ko00561	Glycerolipid metabolism	Metabolism	Lipid metabolism	3	59	ENSBGRG00000025554(DGKK),ENSBGRG00000016172(PNPLA3),ENSBGRG00000013005	0.895169	0.988982		BP	GO:0048814	regulation of dendrite morphogenesis	6	167	0.0112537	0.20648	ENSBGRG00000007622(SMAD1),ENSBGRG00000009644(PPP1R9A),ENSBGRG00000011253(EHMT1),ENSBGRG00000012799(FBXW8),ENSBGRG00000015942(EBF1),ENSBGRG00000024381(EEF2K)
BP	GO:0002230	positive regulation of defense response to virus by host	6	20	ENSBGRG00000001789(STAT1),ENSBGRG00000002944(TOMM70),ENSBGRG00000016956(IL12B),ENSBGRG00000021608(SELENOK),ENSBGRG00000022744(PYCARD),ENSBGRG00000023716(SIN3A)	0.0066592	0.204356		ko03050	Proteasome	Genetic Information Processing	Folding, sorting and degradation	2	44	ENSBGRG00000015635(PSMD14),ENSBGRG00000021126(PSMC4)	0.903907	0.988982		BP	GO:0090087	regulation of peptide transport	18	894	0.0113095	0.206606	ENSBGRG00000001728(ITPR2),ENSBGRG00000001896(DENND4C),ENSBGRG00000002944(TOMM70),ENSBGRG00000005379(ATG5),ENSBGRG00000005984(CSNK1D),ENSBGRG00000006060(IGF1R),ENSBGRG00000008227(UBR5),ENSBGRG00000009838(NUP214),ENSBGRG00000015284(SPTBN1),ENSBGRG00000016568(ACSL3),ENSBGRG00000019951(CATHL6),ENSBGRG00000020321(ENSBGRG00000020321),ENSBGRG00000021365(PIK3C3),ENSBGRG00000024593(TGFBR2),ENSBGRG00000024…
BP	GO:1901099	negative regulation of signal transduction in absence of ligand	6	20	ENSBGRG00000000962(MCL1),ENSBGRG00000007498(ZC3HC1),ENSBGRG00000007850(TERT),ENSBGRG00000009042(RIPK1),ENSBGRG00000012869(EYA1),ENSBGRG00000023016(MAPK7)	0.0066592	0.204356		ko00970	Aminoacyl-tRNA biosynthesis	Genetic Information Processing	Translation	2	44	ENSBGRG00000017391(AARS1),ENSBGRG00000007007(FARS2)	0.903907	0.988982		MF	GO:0004057	arginyltransferase activity	1	1	0.0114248	0.118671	ENSBGRG00000023442(ATE1)
BP	GO:2001240	negative regulation of extrinsic apoptotic signaling pathway in absence of ligand	6	20	ENSBGRG00000000962(MCL1),ENSBGRG00000007498(ZC3HC1),ENSBGRG00000007850(TERT),ENSBGRG00000009042(RIPK1),ENSBGRG00000012869(EYA1),ENSBGRG00000023016(MAPK7)	0.0066592	0.204356		ko05020	Prion disease	Human Diseases	Neurodegenerative disease	16	244	ENSBGRG00000024995,ENSBGRG00000002633(PPP3CA),ENSBGRG00000026030(TUBB4A),ENSBGRG00000023559(PRKACA),ENSBGRG00000001167(PRKACB),ENSBGRG00000010730(NDUFA6),ENSBGRG00000015635(PSMD14),ENSBGRG00000020026(HSPA5),ENSBGRG00000002134(CAV1),ENSBGRG00000001004(VDAC1),ENSBGRG00000008576,ENSBGRG00000006946(NCAM1),ENSBGRG00000021126(PSMC4),ENSBGRG00000003430(C1QC),ENSBGRG00000012730(NDUFA8),ENSBGRG00000001452…	0.906423	0.988982		MF	GO:0004352	glutamate dehydrogenase (NAD+) activity	1	1	0.0114248	0.118671	ENSBGRG00000026591(ENSBGRG00000026591)
BP	GO:0019438	aromatic compound biosynthetic process	280	2741	ENSBGRG00000000004(VGLL3),ENSBGRG00000000061(GABPA),ENSBGRG00000000213(NFE2L2),ENSBGRG00000000235,ENSBGRG00000000283(HP1BP3),ENSBGRG00000000285(CIART),ENSBGRG00000000461(NR4A3),ENSBGRG00000000535,ENSBGRG00000000542(CRTC1),ENSBGRG00000000673(ADCY6),ENSBGRG00000000726(PPIE),ENSBGRG00000000764(CDKN1B),ENSBGRG00000000867(IKZF4),ENSBGRG00000000918(STK36),ENSBGRG00000000977(CERS1),ENSBGRG00000001078(WN…	0.00667636	0.204356		ko05010	Alzheimer disease	Human Diseases	Neurodegenerative disease	23	337	ENSBGRG00000021126(PSMC4),ENSBGRG00000001452(TUBA1B),ENSBGRG00000012730(NDUFA8),ENSBGRG00000013000(NOS2),ENSBGRG00000018786(PTGS2),ENSBGRG00000010730(NDUFA6),ENSBGRG00000015635(PSMD14),ENSBGRG00000026485(SLC39A11),ENSBGRG00000021365(PIK3C3),ENSBGRG00000001078(WNT10B),ENSBGRG00000008576,ENSBGRG00000001004(VDAC1),ENSBGRG00000025124(BACE1),ENSBGRG00000002633(PPP3CA),ENSBGRG00000024995,ENSBGRG0000001…	0.909206	0.988982		MF	GO:0004353	glutamate dehydrogenase [NAD(P)+] activity	1	1	0.0114248	0.118671	ENSBGRG00000026591(ENSBGRG00000026591)
BP	GO:0006919	activation of cysteine-type endopeptidase activity involved in apoptotic process	10	46	ENSBGRG00000000221(F3),ENSBGRG00000003405(NOD1),ENSBGRG00000007038(FASLG),ENSBGRG00000009029(EGLN3),ENSBGRG00000009451(HIP1),ENSBGRG00000010161(MTCH1),ENSBGRG00000019027(ATP2A3),ENSBGRG00000022099(LAPTM5),ENSBGRG00000022744(PYCARD),ENSBGRG00000023500(NGFR)	0.00668355	0.204356		ko05170	Human immunodeficiency virus 1 infection	Human Diseases	Infectious disease: viral	12	191	ENSBGRG00000007038(FASLG),ENSBGRG00000019275(PLCG2),ENSBGRG00000012823,ENSBGRG00000017283(FAS),ENSBGRG00000002633(PPP3CA),ENSBGRG00000009042(RIPK1),ENSBGRG00000000428(ATR),ENSBGRG00000016285,ENSBGRG00000014113(ATM),ENSBGRG00000022326(TRAF5),ENSBGRG00000003553(AP1M2),ENSBGRG00000011285(PAK5)	0.909304	0.988982		MF	GO:0004484	mRNA guanylyltransferase activity	1	1	0.0114248	0.118671	ENSBGRG00000023133(RNGTT)
BP	GO:0001935	endothelial cell proliferation	18	107	ENSBGRG00000000221(F3),ENSBGRG00000001789(STAT1),ENSBGRG00000002134(CAV1),ENSBGRG00000003096(PROK1),ENSBGRG00000003668(APOA1),ENSBGRG00000006109(FLT4),ENSBGRG00000007412(AGGF1),ENSBGRG00000010257(STAT3),ENSBGRG00000010536(FGF2),ENSBGRG00000010846(STAT5A),ENSBGRG00000012214(SCARB1),ENSBGRG00000013085(EGR3),ENSBGRG00000013093(FGF7),ENSBGRG00000016956(IL12B),ENSBGRG00000017354(BMPR2),ENSBGRG00000023…	0.00668722	0.204356		ko05415	Diabetic cardiomyopathy	Human Diseases	Cardiovascular disease	12	191	ENSBGRG00000019027(ATP2A3),ENSBGRG00000013466(COL1A2),ENSBGRG00000004514(GFPT1),ENSBGRG00000024995,ENSBGRG00000005223(PARP1),ENSBGRG00000021420(CAMK2A),ENSBGRG00000008576,ENSBGRG00000001004(VDAC1),ENSBGRG00000012730(NDUFA8),ENSBGRG00000008799(PDK4),ENSBGRG00000010730(NDUFA6),ENSBGRG00000008588(REN)	0.909304	0.988982		MF	GO:0004662	CAAX-protein geranylgeranyltransferase activity	1	1	0.0114248	0.118671	ENSBGRG00000010600(PGGT1B)
BP	GO:0022603	regulation of anatomical structure morphogenesis	76	640	ENSBGRG00000000221(F3),ENSBGRG00000000405(MFSD2A),ENSBGRG00000000520(DPYSL2),ENSBGRG00000000909(FSTL4),ENSBGRG00000001761(IFRD1),ENSBGRG00000001789(STAT1),ENSBGRG00000001905(TBCCD1),ENSBGRG00000001929(EPS8),ENSBGRG00000002633(PPP3CA),ENSBGRG00000003096(PROK1),ENSBGRG00000003668(APOA1),ENSBGRG00000003951(AQP1),ENSBGRG00000004012(PAX9),ENSBGRG00000004203(SEMA7A),ENSBGRG00000004281(HDAC5),ENSBGRG000…	0.00670477	0.204356		ko00563	Glycosylphosphatidylinositol (GPI)-anchor biosynthesis	Metabolism	Glycan biosynthesis and metabolism	1	27	ENSBGRG00000012286(PIGQ)	0.913255	0.988982		MF	GO:0004796	thromboxane-A synthase activity	1	1	0.0114248	0.118671	ENSBGRG00000001023(TBXAS1)
MF	GO:0003727	single-stranded RNA binding	10	47	ENSBGRG00000000726(PPIE),ENSBGRG00000001424(LONP1),ENSBGRG00000001900(FXR1),ENSBGRG00000009562(AGO4),ENSBGRG00000010765(DLX2),ENSBGRG00000011045(LSM14A),ENSBGRG00000011274(DHX9),ENSBGRG00000012275(DHX58),ENSBGRG00000019933(DIS3L2),ENSBGRG00000025458(RBPMS)	0.00673003	0.21594		ko05218	Melanoma	Human Diseases	Cancer: specific types	3	64	ENSBGRG00000013093(FGF7),ENSBGRG00000020100(RB1),ENSBGRG00000010536(FGF2)	0.923717	0.988982		MF	GO:0005456	CMP-N-acetylneuraminate transmembrane transporter activity	1	1	0.0114248	0.118671	ENSBGRG00000022236(SLC35A1)
BP	GO:0007417	central nervous system development	68	563	ENSBGRG00000000405(MFSD2A),ENSBGRG00000000520(DPYSL2),ENSBGRG00000000918(STK36),ENSBGRG00000001901(FOXP2),ENSBGRG00000001923(GAP43),ENSBGRG00000002594(GLI2),ENSBGRG00000003613(PBX3),ENSBGRG00000003951(AQP1),ENSBGRG00000004203(SEMA7A),ENSBGRG00000004372(NTRK2),ENSBGRG00000005119(TTC8),ENSBGRG00000005672(SRC),ENSBGRG00000005861(LDLR),ENSBGRG00000006480(SIX3),ENSBGRG00000007174(FOXO3),ENSBGRG0000000…	0.00686055	0.207403		ko01523	Antifolate resistance	Human Diseases	Drug resistance: antineoplastic	1	29	ENSBGRG00000020672(ABCG2)	0.927651	0.988982		MF	GO:0008267	poly-glutamine tract binding	1	1	0.0114248	0.118671	ENSBGRG00000012463(RERE)
BP	GO:1990778	protein localization to cell periphery	31	218	ENSBGRG00000000197(EPHA3),ENSBGRG00000000587(GPSM2),ENSBGRG00000001676(ZDHHC23),ENSBGRG00000005119(TTC8),ENSBGRG00000005332(STXBP1),ENSBGRG00000006731(CNST),ENSBGRG00000007471(RHOQ),ENSBGRG00000007751(HECTD1),ENSBGRG00000009134(GORASP1),ENSBGRG00000010012(AR),ENSBGRG00000010308(ADAM10),ENSBGRG00000012958(STAC2),ENSBGRG00000013027(RAB7A),ENSBGRG00000013254(TSPAN15),ENSBGRG00000013801(CLSTN1),ENSBG…	0.00686144	0.207403		ko03460	Fanconi anemia pathway	Genetic Information Processing	Replication and repair	2	48	ENSBGRG00000016287(FANCE),ENSBGRG00000000428(ATR)	0.928282	0.988982		MF	GO:0017096	acetylserotonin O-methyltransferase activity	1	1	0.0114248	0.118671	ENSBGRG00000019382(ASMT)
BP	GO:0050793	regulation of developmental process	181	1703	ENSBGRG00000000061(GABPA),ENSBGRG00000000197(EPHA3),ENSBGRG00000000213(NFE2L2),ENSBGRG00000000221(F3),ENSBGRG00000000405(MFSD2A),ENSBGRG00000000520(DPYSL2),ENSBGRG00000000764(CDKN1B),ENSBGRG00000000909(FSTL4),ENSBGRG00000001078(WNT10B),ENSBGRG00000001167(PRKACB),ENSBGRG00000001750(ADGRL2),ENSBGRG00000001761(IFRD1),ENSBGRG00000001789(STAT1),ENSBGRG00000001905(TBCCD1),ENSBGRG00000001929(EPS8),ENSBG…	0.00693242	0.207991		ko03020	RNA polymerase	Genetic Information Processing	Transcription	1	30	ENSBGRG00000023686(CRCP)	0.933928	0.988982		MF	GO:0031775	lutropin-choriogonadotropic hormone receptor binding	1	1	0.0114248	0.118671	ENSBGRG00000010412(ATP2A2)
BP	GO:0065009	regulation of molecular function	160	1487	ENSBGRG00000000197(EPHA3),ENSBGRG00000000215(PLCL2),ENSBGRG00000000221(F3),ENSBGRG00000000542(CRTC1),ENSBGRG00000000764(CDKN1B),ENSBGRG00000000918(STK36),ENSBGRG00000000977(CERS1),ENSBGRG00000001078(WNT10B),ENSBGRG00000001111(C9orf72),ENSBGRG00000001150(PRKAG1),ENSBGRG00000001254(EVI5),ENSBGRG00000001845(KAT2B),ENSBGRG00000002134(CAV1),ENSBGRG00000002167(SNX13),ENSBGRG00000002429(AHCYL1),ENSBGRG0…	0.00708166	0.207991		ko00020	Citrate cycle (TCA cycle)	Metabolism	Carbohydrate metabolism	1	30	ENSBGRG00000002491	0.933928	0.988982		MF	GO:0035598	N6-threonylcarbomyladenosine methylthiotransferase activity	1	1	0.0114248	0.118671	ENSBGRG00000025903(CDKAL1)
BP	GO:0043280	positive regulation of cysteine-type endopeptidase activity involved in apoptotic process	14	76	ENSBGRG00000000221(F3),ENSBGRG00000003405(NOD1),ENSBGRG00000005913(DAPK1),ENSBGRG00000007038(FASLG),ENSBGRG00000009029(EGLN3),ENSBGRG00000009451(HIP1),ENSBGRG00000010161(MTCH1),ENSBGRG00000016600(PDCD5),ENSBGRG00000017283(FAS),ENSBGRG00000019027(ATP2A3),ENSBGRG00000019776(CLEC7A),ENSBGRG00000022099(LAPTM5),ENSBGRG00000022744(PYCARD),ENSBGRG00000023500(NGFR)	0.00712741	0.207991		ko00410	beta-Alanine metabolism	Metabolism	Metabolism of other amino acids	1	30	ENSBGRG00000018041(MLYCD)	0.933928	0.988982		MF	GO:0036134	12-hydroxyheptadecatrienoic acid synthase activity	1	1	0.0114248	0.118671	ENSBGRG00000001023(TBXAS1)
BP	GO:0022610	biological adhesion	95	829	ENSBGRG00000000197(EPHA3),ENSBGRG00000000461(NR4A3),ENSBGRG00000000812(SNED1),ENSBGRG00000001078(WNT10B),ENSBGRG00000002134(CAV1),ENSBGRG00000002536(EPB41L4B),ENSBGRG00000002544(EMCN),ENSBGRG00000002633(PPP3CA),ENSBGRG00000002717,ENSBGRG00000003000(RASA1),ENSBGRG00000003668(APOA1),ENSBGRG00000004717(ITGA5),ENSBGRG00000005094(NEGR1),ENSBGRG00000005204(AJUBA),ENSBGRG00000005255(COL5A1),ENSBGRG00000…	0.00719031	0.207991		ko04622	RIG-I-like receptor signaling pathway	Organismal Systems	Immune system	3	67	ENSBGRG00000016956(IL12B),ENSBGRG00000012275(DHX58),ENSBGRG00000009042(RIPK1)	0.937236	0.988982		MF	GO:0046623	sphingolipid floppase activity	1	1	0.0114248	0.118671	ENSBGRG00000023586(ABCC1)
BP	GO:0030097	hemopoiesis	70	584	ENSBGRG00000000061(GABPA),ENSBGRG00000000213(NFE2L2),ENSBGRG00000000215(PLCL2),ENSBGRG00000001078(WNT10B),ENSBGRG00000001347(LMBR1L),ENSBGRG00000001789(STAT1),ENSBGRG00000002486(XRCC5),ENSBGRG00000002538(SMAD5),ENSBGRG00000002633(PPP3CA),ENSBGRG00000002910(C12orf29),ENSBGRG00000003430(C1QC),ENSBGRG00000003804(CDC73),ENSBGRG00000004564(ZNF385A),ENSBGRG00000004989(ACVR2A),ENSBGRG00000005369(FLT3),E…	0.00732407	0.207991		ko04623	Cytosolic DNA-sensing pathway	Organismal Systems	Immune system	2	50	ENSBGRG00000009042(RIPK1),ENSBGRG00000022744(PYCARD)	0.938158	0.988982		MF	GO:0050355	triphosphatase activity	1	1	0.0114248	0.118671	ENSBGRG00000023133(RNGTT)
BP	GO:0023061	signal release	35	255	ENSBGRG00000003951(AQP1),ENSBGRG00000004306,ENSBGRG00000005332(STXBP1),ENSBGRG00000005964(ILDR2),ENSBGRG00000006801(HADH),ENSBGRG00000007201(NAPB),ENSBGRG00000007842(KLF7),ENSBGRG00000008588(REN),ENSBGRG00000010102(P2RX7),ENSBGRG00000012559(DVL1),ENSBGRG00000013000(NOS2),ENSBGRG00000013205(SYN3),ENSBGRG00000013811(CDK16),ENSBGRG00000015409(CRY1),ENSBGRG00000015485(PAX8),ENSBGRG00000015642(PRKN),E…	0.00743264	0.207991		ko05144	Malaria	Human Diseases	Infectious disease: parasitic	2	51	ENSBGRG00000020779(CSF3),ENSBGRG00000017890(THBS3)	0.942598	0.988982		MF	GO:0061609	fructose-1-phosphate aldolase activity	1	1	0.0114248	0.118671	ENSBGRG00000000599(ENSBGRG00000000599)
MF	GO:0000978	RNA polymerase II cis-regulatory region sequence-specific DNA binding	50	402	ENSBGRG00000000061(GABPA),ENSBGRG00000000213(NFE2L2),ENSBGRG00000000285(CIART),ENSBGRG00000001789(STAT1),ENSBGRG00000001954(ZNF395),ENSBGRG00000002538(SMAD5),ENSBGRG00000002594(GLI2),ENSBGRG00000002783(RORC),ENSBGRG00000003613(PBX3),ENSBGRG00000003739(ETS2),ENSBGRG00000004281(HDAC5),ENSBGRG00000004899(DLX3),ENSBGRG00000005329(OTX2),ENSBGRG00000005831(KLF5),ENSBGRG00000006480(SIX3),ENSBGRG00000006…	0.00750596	0.21594		ko04613	Neutrophil extracellular trap formation	Organismal Systems	Immune system	9	160	ENSBGRG00000001004(VDAC1),ENSBGRG00000005672(SRC),ENSBGRG00000004281(HDAC5),ENSBGRG00000007092,ENSBGRG00000002796(HDAC10),ENSBGRG00000009260,ENSBGRG00000017843(H2AZ2),ENSBGRG00000019275(PLCG2),ENSBGRG00000019776(CLEC7A)	0.942723	0.988982		MF	GO:0086039	calcium-transporting ATPase activity involved in regulation of cardiac muscle cell membrane potential	1	1	0.0114248	0.118671	ENSBGRG00000010412(ATP2A2)
BP	GO:0010033	response to organic substance	174	1634	ENSBGRG00000000061(GABPA),ENSBGRG00000000131(IFNAR2),ENSBGRG00000000197(EPHA3),ENSBGRG00000000213(NFE2L2),ENSBGRG00000000593(PRKAA2),ENSBGRG00000000673(ADCY6),ENSBGRG00000000764(CDKN1B),ENSBGRG00000000798(GABRG2),ENSBGRG00000000962(MCL1),ENSBGRG00000000977(CERS1),ENSBGRG00000001078(WNT10B),ENSBGRG00000001178(SGTA),ENSBGRG00000001451(CHMP5),ENSBGRG00000001452(TUBA1B),ENSBGRG00000001529(GRAMD1C),EN…	0.00752587	0.207991		ko04972	Pancreatic secretion	Organismal Systems	Digestive system	4	86	ENSBGRG00000019027(ATP2A3),ENSBGRG00000000673(ADCY6),ENSBGRG00000005071,ENSBGRG00000005175	0.946893	0.988982		MF	GO:1990931	RNA N6-methyladenosine dioxygenase activity	1	1	0.0114248	0.118671	ENSBGRG00000024270(FTO)
MF	GO:0001018	mitochondrial promoter sequence-specific DNA binding	2	2	ENSBGRG00000001424(LONP1),ENSBGRG00000019113(TFAM)	0.00770684	0.21594		ko04270	Vascular smooth muscle contraction	Organismal Systems	Circulatory system	6	118	ENSBGRG00000005071,ENSBGRG00000000673(ADCY6),ENSBGRG00000023559(PRKACA),ENSBGRG00000001167(PRKACB),ENSBGRG00000005175,ENSBGRG00000018578(KCNMB1)	0.949049	0.988982		BP	GO:0010506	regulation of autophagy	10	386	0.0116462	0.211839	ENSBGRG00000002824(USP33),ENSBGRG00000005379(ATG5),ENSBGRG00000006060(IGF1R),ENSBGRG00000006248(PIKFYVE),ENSBGRG00000007817(ATP6V1C1),ENSBGRG00000021132(VMP1),ENSBGRG00000021365(PIK3C3),ENSBGRG00000021574(ANKRD17),ENSBGRG00000022197(FBXL2),ENSBGRG00000022891(RAF1)
MF	GO:0004473	malate dehydrogenase (decarboxylating) (NADP+) activity	2	2	ENSBGRG00000015027(ME1),ENSBGRG00000025466(ME3)	0.00770684	0.21594		ko05150	Staphylococcus aureus infection	Human Diseases	Infectious disease: bacterial	4	87	ENSBGRG00000009260,ENSBGRG00000003430(C1QC),ENSBGRG00000022452,ENSBGRG00000026148	0.950022	0.988982		BP	GO:0000183	rDNA heterochromatin assembly	2	15	0.0118626	0.212119	ENSBGRG00000020282(SMARCA5),ENSBGRG00000026049(PHF8)
MF	GO:0008476	protein-tyrosine sulfotransferase activity	2	2	ENSBGRG00000015814(TPST2),ENSBGRG00000023623(TPST1)	0.00770684	0.21594		ko04915	Estrogen signaling pathway	Organismal Systems	Endocrine system	6	120	ENSBGRG00000001167(PRKACB),ENSBGRG00000023559(PRKACA),ENSBGRG00000000673(ADCY6),ENSBGRG00000007869(KCNJ3),ENSBGRG00000005672(SRC),ENSBGRG00000005168	0.954213	0.990221		BP	GO:0002517	T cell tolerance induction	2	15	0.0118626	0.212119	ENSBGRG00000004626(CBLB),ENSBGRG00000024593(TGFBR2)
MF	GO:0015141	succinate transmembrane transporter activity	2	2	ENSBGRG00000021961(SLC13A3),ENSBGRG00000024776(SLC13A2)	0.00770684	0.21594		ko04024	cAMP signaling pathway	Environmental Information Processing	Signal transduction	11	200	ENSBGRG00000004554(VAV2),ENSBGRG00000005550(HCN2),ENSBGRG00000010476(GRIA3),ENSBGRG00000015840(VIPR2),ENSBGRG00000021837(CGA),ENSBGRG00000020983(GRIA4),ENSBGRG00000021420(CAMK2A),ENSBGRG00000001167(PRKACB),ENSBGRG00000023559(PRKACA),ENSBGRG00000019027(ATP2A3),ENSBGRG00000000673(ADCY6)	0.965258	0.998058		BP	GO:0051801	cytolysis in other organism involved in symbiotic interaction	2	15	0.0118626	0.212119	ENSBGRG00000019951(CATHL6),ENSBGRG00000020321(ENSBGRG00000020321)
MF	GO:0042284	sphingolipid delta-4 desaturase activity	2	2	ENSBGRG00000009888(DEGS1),ENSBGRG00000021104(DEGS2)	0.00770684	0.21594		ko04022	cGMP-PKG signaling pathway	Environmental Information Processing	Signal transduction	7	142	ENSBGRG00000018578(KCNMB1),ENSBGRG00000002633(PPP3CA),ENSBGRG00000019027(ATP2A3),ENSBGRG00000000673(ADCY6),ENSBGRG00000007268(PIK3CG),ENSBGRG00000001004(VDAC1),ENSBGRG00000026668(PIK3R6)	0.967814	0.998058		BP	GO:0071073	positive regulation of phospholipid biosynthetic process	2	15	0.0118626	0.212119	ENSBGRG00000016568(ACSL3),ENSBGRG00000024816(ADGRF5)
MF	GO:0048403	brain-derived neurotrophic factor binding	2	2	ENSBGRG00000000909(FSTL4),ENSBGRG00000004372(NTRK2)	0.00770684	0.21594		ko05231	Choline metabolism in cancer	Human Diseases	Cancer: overview	3	82	ENSBGRG00000025554(DGKK),ENSBGRG00000003447(SLC44A5),ENSBGRG00000017713(SLC44A4)	0.97728	0.999708		BP	GO:0022607	cellular component assembly	54	3634	0.0119679	0.212328	ENSBGRG00000000599(ENSBGRG00000000599),ENSBGRG00000000973(FGD6),ENSBGRG00000001141(ABCA1),ENSBGRG00000001484(SEC24B),ENSBGRG00000001896(DENND4C),ENSBGRG00000003960(ENAH),ENSBGRG00000004749(MYL1),ENSBGRG00000005235(TENT2),ENSBGRG00000005343(ENSBGRG00000005343),ENSBGRG00000005379(ATG5),ENSBGRG00000005383(DGKH),ENSBGRG00000005984(CSNK1D),ENSBGRG00000006060(IGF1R),ENSBGRG00000006248(PIKFYVE),ENSBGRG0…
BP	GO:0009952	anterior/posterior pattern specification	24	159	ENSBGRG00000002039(HOXA6),ENSBGRG00000002594(GLI2),ENSBGRG00000003766(HOXC13),ENSBGRG00000003786(MYF6),ENSBGRG00000004989(ACVR2A),ENSBGRG00000006338(PCDH8),ENSBGRG00000008954(BPTF),ENSBGRG00000010067(GDF11),ENSBGRG00000010388(MSX1),ENSBGRG00000011397(AURKA),ENSBGRG00000013269(FOXF1),ENSBGRG00000014113(ATM),ENSBGRG00000015112(MIB1),ENSBGRG00000015546(RNF2),ENSBGRG00000016979(HOXD10),ENSBGRG0000001…	0.00791417	0.207991		ko05171	Coronavirus disease - COVID-19	Human Diseases	Infectious disease: viral	15	268	ENSBGRG00000011584(ACE2),ENSBGRG00000014066(MX1),ENSBGRG00000009260,ENSBGRG00000016956(IL12B),ENSBGRG00000000131(IFNAR2),ENSBGRG00000003430(C1QC),ENSBGRG00000018711(MMP3),ENSBGRG00000001789(STAT1),ENSBGRG00000026148,ENSBGRG00000018916(F13A1),ENSBGRG00000010257(STAT3),ENSBGRG00000019275(PLCG2),ENSBGRG00000026699,ENSBGRG00000015272,ENSBGRG00000020779(CSF3)	0.977906	0.999708		BP	GO:2000278	regulation of DNA biosynthetic process	5	122	0.0119749	0.212328	ENSBGRG00000002158(HMBOX1),ENSBGRG00000005231(NIBAN2),ENSBGRG00000013584(NOX4),ENSBGRG00000015028(DUSP1),ENSBGRG00000016159(NEK7)
MF	GO:0016796	exonuclease activity, active with either ribo- or deoxyribonucleic acids and producing 5'-phosphomonoesters	8	34	ENSBGRG00000005503(REXO2),ENSBGRG00000005813(PAN3),ENSBGRG00000011128(EXOSC10),ENSBGRG00000012216(CNOT1),ENSBGRG00000019933(DIS3L2),ENSBGRG00000020412(PLD3),ENSBGRG00000021342(MRE11),ENSBGRG00000026089(PARN)	0.00794073	0.218295		ko04013	MAPK signaling pathway - fly	Environmental Information Processing	Signal transduction	3	85	ENSBGRG00000003000(RASA1),ENSBGRG00000005672(SRC),ENSBGRG00000003307(TBL1XR1)	0.981589	0.999708		BP	GO:0071392	cellular response to estradiol stimulus	3	43	0.0122207	0.21488	ENSBGRG00000005267(CCDC62),ENSBGRG00000006060(IGF1R),ENSBGRG00000020672(ABCG2)
BP	GO:0044087	regulation of cellular component biogenesis	79	674	ENSBGRG00000000197(EPHA3),ENSBGRG00000000428(ATR),ENSBGRG00000000587(GPSM2),ENSBGRG00000000593(PRKAA2),ENSBGRG00000000764(CDKN1B),ENSBGRG00000001078(WNT10B),ENSBGRG00000001111(C9orf72),ENSBGRG00000001451(CHMP5),ENSBGRG00000001750(ADGRL2),ENSBGRG00000001845(KAT2B),ENSBGRG00000001923(GAP43),ENSBGRG00000001929(EPS8),ENSBGRG00000002134(CAV1),ENSBGRG00000002486(XRCC5),ENSBGRG00000003000(RASA1),ENSBGRG…	0.0079603	0.207991		ko05235	PD-L1 expression and PD-1 checkpoint pathway in cancer	Human Diseases	Cancer: overview	3	85	ENSBGRG00000002633(PPP3CA),ENSBGRG00000001789(STAT1),ENSBGRG00000010257(STAT3)	0.981589	0.999708		BP	GO:1902042	negative regulation of extrinsic apoptotic signaling pathway via death domain receptors	3	43	0.0122207	0.21488	ENSBGRG00000022578(CFLAR),ENSBGRG00000022891(RAF1),ENSBGRG00000024536(BMP5)
BP	GO:0006820	anion transport	48	376	ENSBGRG00000000405(MFSD2A),ENSBGRG00000000798(GABRG2),ENSBGRG00000001004(VDAC1),ENSBGRG00000002429(AHCYL1),ENSBGRG00000002454(LRRC8D),ENSBGRG00000003668(APOA1),ENSBGRG00000004372(NTRK2),ENSBGRG00000004485(G6PC3),ENSBGRG00000005071,ENSBGRG00000005175,ENSBGRG00000005554(SLC43A1),ENSBGRG00000005861(LDLR),ENSBGRG00000006083(SLC26A4),ENSBGRG00000006751(SLC7A1),ENSBGRG00000007038(FASLG),ENSBGRG00000007…	0.00798197	0.207991		ko02010	ABC transporters	Environmental Information Processing	Membrane transport	1	46	ENSBGRG00000020672(ABCG2)	0.984561	0.999708		BP	GO:0048589	developmental growth	23	1251	0.0123704	0.21661	ENSBGRG00000001761(IFRD1),ENSBGRG00000002518(DDR2),ENSBGRG00000002944(TOMM70),ENSBGRG00000003960(ENAH),ENSBGRG00000005984(CSNK1D),ENSBGRG00000006060(IGF1R),ENSBGRG00000007622(SMAD1),ENSBGRG00000008227(UBR5),ENSBGRG00000008613(ENSBGRG00000008613),ENSBGRG00000015284(SPTBN1),ENSBGRG00000016159(NEK7),ENSBGRG00000016288(MAGI2),ENSBGRG00000016568(ACSL3),ENSBGRG00000016848(ANOS1),ENSBGRG00000020056(DLG1…
CC	GO:0061852	retrograte transporter complex, Golgi to ER	2	2	ENSBGRG00000003130(ERGIC2),ENSBGRG00000010399(ERGIC3)	0.00801758	0.32643		ko05213	Endometrial cancer	Human Diseases	Cancer: specific types	1	51	ENSBGRG00000007174(FOXO3)	0.990205	1		CC	GO:0042641	actomyosin	4	82	0.0124289	0.23907	ENSBGRG00000003960(ENAH),ENSBGRG00000006051(CDC42BPA),ENSBGRG00000008351(MYH7),ENSBGRG00000009644(PPP1R9A)
BP	GO:0002016	regulation of blood volume by renin-angiotensin	2	2	ENSBGRG00000008588(REN),ENSBGRG00000011584(ACE2)	0.00805161	0.207991		ko05322	Systemic lupus erythematosus	Human Diseases	Immune disease	4	128	ENSBGRG00000022452,ENSBGRG00000003430(C1QC),ENSBGRG00000009260,ENSBGRG00000017843(H2AZ2)	0.996656	1		CC	GO:0015629	actin cytoskeleton	11	462	0.0127167	0.23907	ENSBGRG00000002518(DDR2),ENSBGRG00000003783(SPTB),ENSBGRG00000003960(ENAH),ENSBGRG00000004749(MYL1),ENSBGRG00000006051(CDC42BPA),ENSBGRG00000007922(MYH6),ENSBGRG00000008351(MYH7),ENSBGRG00000008613(ENSBGRG00000008613),ENSBGRG00000009644(PPP1R9A),ENSBGRG00000015284(SPTBN1),ENSBGRG00000024670(LMOD2)
BP	GO:0006478	peptidyl-tyrosine sulfation	2	2	ENSBGRG00000015814(TPST2),ENSBGRG00000023623(TPST1)	0.00805161	0.207991		ko03010	Ribosome	Genetic Information Processing	Translation	6	186	ENSBGRG00000007836(MRPL3),ENSBGRG00000026699,ENSBGRG00000015272,ENSBGRG00000008155,ENSBGRG00000020952(MRPS18C),ENSBGRG00000013490(MRPL16)	0.999183	1		BP	GO:0051960	regulation of nervous system development	25	1399	0.0128393	0.221854	ENSBGRG00000001761(IFRD1),ENSBGRG00000002518(DDR2),ENSBGRG00000003960(ENAH),ENSBGRG00000005984(CSNK1D),ENSBGRG00000006060(IGF1R),ENSBGRG00000007622(SMAD1),ENSBGRG00000008613(ENSBGRG00000008613),ENSBGRG00000009140(PRKCH),ENSBGRG00000009644(PPP1R9A),ENSBGRG00000011253(EHMT1),ENSBGRG00000012799(FBXW8),ENSBGRG00000015284(SPTBN1),ENSBGRG00000015942(EBF1),ENSBGRG00000016288(MAGI2),ENSBGRG00000016568(AC…
BP	GO:0010899	regulation of phosphatidylcholine catabolic process	2	2	ENSBGRG00000005861(LDLR),ENSBGRG00000012214(SCARB1)	0.00805161	0.207991		ko05210	Colorectal cancer	Human Diseases	Cancer: specific types	1	79	ENSBGRG00000024537(SMAD4)	0.999238	1		CC	GO:0032039	integrator complex	2	16	0.012876	0.23907	ENSBGRG00000013819(INTS10),ENSBGRG00000021952(INTS7)
BP	GO:0015744	succinate transport	2	2	ENSBGRG00000021961(SLC13A3),ENSBGRG00000024776(SLC13A2)	0.00805161	0.207991		ko04740	Olfactory transduction	Organismal Systems	Sensory system	5	589	ENSBGRG00000010076(ANO2),ENSBGRG00000021420(CAMK2A),ENSBGRG00000011420,ENSBGRG00000023559(PRKACA),ENSBGRG00000001167(PRKACB)	1	1		BP	GO:0060395	SMAD protein signal transduction	4	81	0.0128926	0.221854	ENSBGRG00000007622(SMAD1),ENSBGRG00000015284(SPTBN1),ENSBGRG00000016288(MAGI2),ENSBGRG00000024536(BMP5)
BP	GO:0021893	cerebral cortex GABAergic interneuron fate commitment	2	2	ENSBGRG00000010658(DLX1),ENSBGRG00000010765(DLX2)	0.00805161	0.207991												CC	GO:0019005	SCF ubiquitin ligase complex	4	83	0.0129496	0.23907	ENSBGRG00000002321(FBXO42),ENSBGRG00000012799(FBXW8),ENSBGRG00000022197(FBXL2),ENSBGRG00000026508(FBXL4)
BP	GO:0034486	vacuolar transmembrane transport	2	2	ENSBGRG00000006624(SLC46A3),ENSBGRG00000010376(SLC15A4)	0.00805161	0.207991												BP	GO:0010562	positive regulation of phosphorus metabolic process	23	1257	0.0130398	0.221854	ENSBGRG00000002518(DDR2),ENSBGRG00000004461(LRRK1),ENSBGRG00000005984(CSNK1D),ENSBGRG00000006060(IGF1R),ENSBGRG00000007364(DENND2B),ENSBGRG00000008391(PRRC1),ENSBGRG00000008463(TLK1),ENSBGRG00000009644(PPP1R9A),ENSBGRG00000011586(ERCC6),ENSBGRG00000013584(NOX4),ENSBGRG00000016288(MAGI2),ENSBGRG00000016568(ACSL3),ENSBGRG00000018618(DOCK7),ENSBGRG00000019540(CACUL1),ENSBGRG00000019951(CATHL6),ENSBG…
BP	GO:0035880	embryonic nail plate morphogenesis	2	2	ENSBGRG00000007688(FZD6),ENSBGRG00000010388(MSX1)	0.00805161	0.207991												BP	GO:0045937	positive regulation of phosphate metabolic process	23	1257	0.0130398	0.221854	ENSBGRG00000002518(DDR2),ENSBGRG00000004461(LRRK1),ENSBGRG00000005984(CSNK1D),ENSBGRG00000006060(IGF1R),ENSBGRG00000007364(DENND2B),ENSBGRG00000008391(PRRC1),ENSBGRG00000008463(TLK1),ENSBGRG00000009644(PPP1R9A),ENSBGRG00000011586(ERCC6),ENSBGRG00000013584(NOX4),ENSBGRG00000016288(MAGI2),ENSBGRG00000016568(ACSL3),ENSBGRG00000018618(DOCK7),ENSBGRG00000019540(CACUL1),ENSBGRG00000019951(CATHL6),ENSBG…
BP	GO:0043634	polyadenylation-dependent ncRNA catabolic process	2	2	ENSBGRG00000006587(EXOSC9),ENSBGRG00000011128(EXOSC10)	0.00805161	0.207991												BP	GO:0051962	positive regulation of nervous system development	16	774	0.0132217	0.221854	ENSBGRG00000002518(DDR2),ENSBGRG00000005984(CSNK1D),ENSBGRG00000006060(IGF1R),ENSBGRG00000007622(SMAD1),ENSBGRG00000008613(ENSBGRG00000008613),ENSBGRG00000009140(PRKCH),ENSBGRG00000009644(PPP1R9A),ENSBGRG00000011253(EHMT1),ENSBGRG00000012799(FBXW8),ENSBGRG00000016288(MAGI2),ENSBGRG00000018952(TRAK1),ENSBGRG00000022578(CFLAR),ENSBGRG00000022891(RAF1),ENSBGRG00000024381(EEF2K),ENSBGRG00000024536(BM…
BP	GO:0046878	positive regulation of saliva secretion	2	2	ENSBGRG00000002633(PPP3CA),ENSBGRG00000003951(AQP1)	0.00805161	0.207991												BP	GO:0051647	nucleus localization	4	82	0.0134384	0.221854	ENSBGRG00000005235(TENT2),ENSBGRG00000006051(CDC42BPA),ENSBGRG00000018618(DOCK7),ENSBGRG00000018694(USP9X)
BP	GO:0071029	nuclear ncRNA surveillance	2	2	ENSBGRG00000006587(EXOSC9),ENSBGRG00000011128(EXOSC10)	0.00805161	0.207991												BP	GO:0018027	peptidyl-lysine dimethylation	2	16	0.0134585	0.221854	ENSBGRG00000011253(EHMT1),ENSBGRG00000019016(SETD3)
BP	GO:0071035	nuclear polyadenylation-dependent rRNA catabolic process	2	2	ENSBGRG00000006587(EXOSC9),ENSBGRG00000011128(EXOSC10)	0.00805161	0.207991												BP	GO:0021924	cell proliferation in external granule layer	2	16	0.0134585	0.221854	ENSBGRG00000009216(BRWD1),ENSBGRG00000012463(RERE)
BP	GO:0071046	nuclear polyadenylation-dependent ncRNA catabolic process	2	2	ENSBGRG00000006587(EXOSC9),ENSBGRG00000011128(EXOSC10)	0.00805161	0.207991												BP	GO:0021930	cerebellar granule cell precursor proliferation	2	16	0.0134585	0.221854	ENSBGRG00000009216(BRWD1),ENSBGRG00000012463(RERE)
BP	GO:0071422	succinate transmembrane transport	2	2	ENSBGRG00000021961(SLC13A3),ENSBGRG00000024776(SLC13A2)	0.00805161	0.207991												BP	GO:0033700	phospholipid efflux	2	16	0.0134585	0.221854	ENSBGRG00000001141(ABCA1),ENSBGRG00000023586(ABCC1)
BP	GO:0071895	odontoblast differentiation	2	2	ENSBGRG00000004899(DLX3),ENSBGRG00000025440(SERPINE1)	0.00805161	0.207991												BP	GO:0035076	ecdysone receptor-mediated signaling pathway	2	16	0.0134585	0.221854	ENSBGRG00000011253(EHMT1),ENSBGRG00000020282(SMARCA5)
BP	GO:0097213	regulation of lysosomal membrane permeability	2	2	ENSBGRG00000022099(LAPTM5),ENSBGRG00000022541(MT3)	0.00805161	0.207991												BP	GO:0044539	long-chain fatty acid import into cell	2	16	0.0134585	0.221854	ENSBGRG00000016568(ACSL3),ENSBGRG00000023586(ABCC1)
BP	GO:0097214	positive regulation of lysosomal membrane permeability	2	2	ENSBGRG00000022099(LAPTM5),ENSBGRG00000022541(MT3)	0.00805161	0.207991												BP	GO:0045175	basal protein localization	2	16	0.0134585	0.221854	ENSBGRG00000001896(DENND4C),ENSBGRG00000024953(DENND4A)
BP	GO:0097744	urate salt excretion	2	2	ENSBGRG00000018147(UMOD),ENSBGRG00000020672(ABCG2)	0.00805161	0.207991												BP	GO:0140354	lipid import into cell	2	16	0.0134585	0.221854	ENSBGRG00000016568(ACSL3),ENSBGRG00000023586(ABCC1)
BP	GO:0099403	maintenance of mitotic sister chromatid cohesion, telomeric	2	2	ENSBGRG00000016038(ATRX),ENSBGRG00000025654(TNKS)	0.00805161	0.207991												BP	GO:1990637	response to prolactin	2	16	0.0134585	0.221854	ENSBGRG00000014876(ATP7B),ENSBGRG00000024381(EEF2K)
BP	GO:0099404	mitotic sister chromatid cohesion, telomeric	2	2	ENSBGRG00000016038(ATRX),ENSBGRG00000025654(TNKS)	0.00805161	0.207991												BP	GO:0006996	organelle organization	63	4400	0.0136387	0.223476	ENSBGRG00000000139(SON),ENSBGRG00000000629(GNPTAB),ENSBGRG00000000973(FGD6),ENSBGRG00000001141(ABCA1),ENSBGRG00000001484(SEC24B),ENSBGRG00000002158(HMBOX1),ENSBGRG00000002824(USP33),ENSBGRG00000002944(TOMM70),ENSBGRG00000003960(ENAH),ENSBGRG00000004149(PTBP3),ENSBGRG00000004274(RABGAP1L),ENSBGRG00000004749(MYL1),ENSBGRG00000005235(TENT2),ENSBGRG00000005379(ATG5),ENSBGRG00000005459(PRDM5),ENSBGRG0…
BP	GO:1900623	regulation of monocyte aggregation	2	2	ENSBGRG00000000461(NR4A3),ENSBGRG00000020517(CD44)	0.00805161	0.207991												BP	GO:0042692	muscle cell differentiation	13	581	0.0136627	0.223476	ENSBGRG00000001761(IFRD1),ENSBGRG00000002944(TOMM70),ENSBGRG00000005231(NIBAN2),ENSBGRG00000005379(ATG5),ENSBGRG00000008613(ENSBGRG00000008613),ENSBGRG00000010412(ATP2A2),ENSBGRG00000013023(RAPGEF1),ENSBGRG00000013584(NOX4),ENSBGRG00000015942(EBF1),ENSBGRG00000019016(SETD3),ENSBGRG00000021574(ANKRD17),ENSBGRG00000022578(CFLAR),ENSBGRG00000024670(LMOD2)
BP	GO:1900625	positive regulation of monocyte aggregation	2	2	ENSBGRG00000000461(NR4A3),ENSBGRG00000020517(CD44)	0.00805161	0.207991												BP	GO:0048009	insulin-like growth factor receptor signaling pathway	3	45	0.0138258	0.22527	ENSBGRG00000006060(IGF1R),ENSBGRG00000009140(PRKCH),ENSBGRG00000024536(BMP5)
BP	GO:1902162	regulation of DNA damage response, signal transduction by p53 class mediator resulting in transcription of p21 class mediator	2	2	ENSBGRG00000004564(ZNF385A),ENSBGRG00000012719(COPS3)	0.00805161	0.207991												MF	GO:0005215	transporter activity	23	1242	0.0140083	0.140998	ENSBGRG00000001141(ABCA1),ENSBGRG00000001484(SEC24B),ENSBGRG00000001728(ITPR2),ENSBGRG00000002944(TOMM70),ENSBGRG00000004086(DENND5B),ENSBGRG00000004575(SERINC5),ENSBGRG00000005343(ENSBGRG00000005343),ENSBGRG00000007817(ATP6V1C1),ENSBGRG00000009072(SLC30A7),ENSBGRG00000009838(NUP214),ENSBGRG00000010412(ATP2A2),ENSBGRG00000010530(SLC26A7),ENSBGRG00000011855(ATP8B1),ENSBGRG00000012244(GRIK4),ENSBGR…
BP	GO:1904868	telomerase catalytic core complex assembly	2	2	ENSBGRG00000000428(ATR),ENSBGRG00000014113(ATM)	0.00805161	0.207991												MF	GO:0070742	C2H2 zinc finger domain binding	2	16	0.0140122	0.140998	ENSBGRG00000011253(EHMT1),ENSBGRG00000015942(EBF1)
BP	GO:1904882	regulation of telomerase catalytic core complex assembly	2	2	ENSBGRG00000000428(ATR),ENSBGRG00000014113(ATM)	0.00805161	0.207991												CC	GO:0043231	intracellular membrane-bounded organelle	121	9782	0.014079	0.250294	ENSBGRG00000000139(SON),ENSBGRG00000000262(BOLL),ENSBGRG00000000266(PROS1),ENSBGRG00000000599(ENSBGRG00000000599),ENSBGRG00000000629(GNPTAB),ENSBGRG00000000973(FGD6),ENSBGRG00000001023(TBXAS1),ENSBGRG00000001141(ABCA1),ENSBGRG00000001484(SEC24B),ENSBGRG00000001728(ITPR2),ENSBGRG00000001761(IFRD1),ENSBGRG00000001896(DENND4C),ENSBGRG00000002158(HMBOX1),ENSBGRG00000002693(APBB2),ENSBGRG00000002824(U…
BP	GO:1904884	positive regulation of telomerase catalytic core complex assembly	2	2	ENSBGRG00000000428(ATR),ENSBGRG00000014113(ATM)	0.00805161	0.207991												BP	GO:0009057	macromolecule catabolic process	26	1486	0.0144031	0.233773	ENSBGRG00000000262(BOLL),ENSBGRG00000002321(FBXO42),ENSBGRG00000002824(USP33),ENSBGRG00000004626(CBLB),ENSBGRG00000005235(TENT2),ENSBGRG00000005379(ATG5),ENSBGRG00000005984(CSNK1D),ENSBGRG00000007598(ZRANB1),ENSBGRG00000007714(RNF144B),ENSBGRG00000008227(UBR5),ENSBGRG00000009278(TMEM67),ENSBGRG00000009838(NUP214),ENSBGRG00000012799(FBXW8),ENSBGRG00000012856(UBE2D1),ENSBGRG00000013378(FEM1C),ENSBG…
BP	GO:1904907	regulation of maintenance of mitotic sister chromatid cohesion, telomeric	2	2	ENSBGRG00000016038(ATRX),ENSBGRG00000025654(TNKS)	0.00805161	0.207991												BP	GO:0043500	muscle adaptation	5	128	0.0144949	0.234362	ENSBGRG00000002944(TOMM70),ENSBGRG00000008351(MYH7),ENSBGRG00000010412(ATP2A2),ENSBGRG00000022578(CFLAR),ENSBGRG00000023693(MLIP)
BP	GO:1904908	negative regulation of maintenance of mitotic sister chromatid cohesion, telomeric	2	2	ENSBGRG00000016038(ATRX),ENSBGRG00000025654(TNKS)	0.00805161	0.207991												BP	GO:0048580	regulation of post-embryonic development	6	177	0.0146507	0.235822	ENSBGRG00000004626(CBLB),ENSBGRG00000006060(IGF1R),ENSBGRG00000012411(LRBA),ENSBGRG00000015942(EBF1),ENSBGRG00000016974(NBEA),ENSBGRG00000020282(SMARCA5)
BP	GO:2000848	positive regulation of corticosteroid hormone secretion	2	2	ENSBGRG00000019832(C1QTNF1),ENSBGRG00000023482(GALR1)	0.00805161	0.207991												BP	GO:0032970	regulation of actin filament-based process	11	461	0.014697	0.235822	ENSBGRG00000003960(ENAH),ENSBGRG00000004749(MYL1),ENSBGRG00000005984(CSNK1D),ENSBGRG00000008613(ENSBGRG00000008613),ENSBGRG00000009644(PPP1R9A),ENSBGRG00000010412(ATP2A2),ENSBGRG00000011309(ARHGAP18),ENSBGRG00000013584(NOX4),ENSBGRG00000020056(DLG1),ENSBGRG00000024593(TGFBR2),ENSBGRG00000024670(LMOD2)
BP	GO:2000855	regulation of mineralocorticoid secretion	2	2	ENSBGRG00000008588(REN),ENSBGRG00000019832(C1QTNF1)	0.00805161	0.207991												BP	GO:0030029	actin filament-based process	19	989	0.0147967	0.236523	ENSBGRG00000000973(FGD6),ENSBGRG00000003960(ENAH),ENSBGRG00000004749(MYL1),ENSBGRG00000005984(CSNK1D),ENSBGRG00000006051(CDC42BPA),ENSBGRG00000007922(MYH6),ENSBGRG00000008351(MYH7),ENSBGRG00000008613(ENSBGRG00000008613),ENSBGRG00000009644(PPP1R9A),ENSBGRG00000010412(ATP2A2),ENSBGRG00000011309(ARHGAP18),ENSBGRG00000013023(RAPGEF1),ENSBGRG00000013584(NOX4),ENSBGRG00000016018(ABR),ENSBGRG00000020056…
BP	GO:2000858	regulation of aldosterone secretion	2	2	ENSBGRG00000008588(REN),ENSBGRG00000019832(C1QTNF1)	0.00805161	0.207991												CC	GO:0043005	neuron projection	27	1603	0.015057	0.258121	ENSBGRG00000001728(ITPR2),ENSBGRG00000002518(DDR2),ENSBGRG00000002693(APBB2),ENSBGRG00000003960(ENAH),ENSBGRG00000005235(TENT2),ENSBGRG00000005379(ATG5),ENSBGRG00000005984(CSNK1D),ENSBGRG00000006060(IGF1R),ENSBGRG00000006248(PIKFYVE),ENSBGRG00000009644(PPP1R9A),ENSBGRG00000011372(BMP2K),ENSBGRG00000011855(ATP8B1),ENSBGRG00000012099(LAMA2),ENSBGRG00000012244(GRIK4),ENSBGRG00000012550(ATP8B4),ENSBG…
BP	GO:0061323	cell proliferation involved in heart morphogenesis	5	15	ENSBGRG00000008619(SIX1),ENSBGRG00000012869(EYA1),ENSBGRG00000014068(MKS1),ENSBGRG00000017354(BMPR2),ENSBGRG00000024537(SMAD4)	0.0080751	0.207991												BP	GO:0039535	regulation of RIG-I signaling pathway	2	17	0.0151419	0.241128	ENSBGRG00000021574(ANKRD17),ENSBGRG00000025394(NPLOC4)
BP	GO:2000136	regulation of cell proliferation involved in heart morphogenesis	5	15	ENSBGRG00000008619(SIX1),ENSBGRG00000012869(EYA1),ENSBGRG00000014068(MKS1),ENSBGRG00000017354(BMPR2),ENSBGRG00000024537(SMAD4)	0.0080751	0.207991												BP	GO:0050764	regulation of phagocytosis	5	130	0.0154083	0.244447	ENSBGRG00000000266(PROS1),ENSBGRG00000005379(ATG5),ENSBGRG00000016018(ABR),ENSBGRG00000021365(PIK3C3),ENSBGRG00000021443(ANO6)
BP	GO:0002218	activation of innate immune response	7	27	ENSBGRG00000001666(CASP6),ENSBGRG00000002486(XRCC5),ENSBGRG00000002944(TOMM70),ENSBGRG00000006153(FCN1),ENSBGRG00000019275(PLCG2),ENSBGRG00000022744(PYCARD),ENSBGRG00000023716(SIN3A)	0.00825106	0.211777												BP	GO:0010498	proteasomal protein catabolic process	12	527	0.0154791	0.244651	ENSBGRG00000002321(FBXO42),ENSBGRG00000005984(CSNK1D),ENSBGRG00000007714(RNF144B),ENSBGRG00000009278(TMEM67),ENSBGRG00000012799(FBXW8),ENSBGRG00000012856(UBE2D1),ENSBGRG00000013378(FEM1C),ENSBGRG00000022197(FBXL2),ENSBGRG00000023442(ATE1),ENSBGRG00000025250(RHBDF2),ENSBGRG00000025394(NPLOC4),ENSBGRG00000026508(FBXL4)
BP	GO:0018105	peptidyl-serine phosphorylation	26	177	ENSBGRG00000000428(ATR),ENSBGRG00000002134(CAV1),ENSBGRG00000004372(NTRK2),ENSBGRG00000005984(CSNK1D),ENSBGRG00000009042(RIPK1),ENSBGRG00000011397(AURKA),ENSBGRG00000011775(NOS1),ENSBGRG00000011880(MLXIPL),ENSBGRG00000012192(NTRK3),ENSBGRG00000012573(NCK2),ENSBGRG00000014113(ATM),ENSBGRG00000014122(PWP1),ENSBGRG00000016090(MAPKAPK2),ENSBGRG00000017193(TCL1A),ENSBGRG00000017585(WNK1),ENSBGRG000000…	0.0083588	0.213792												MF	GO:0042054	histone methyltransferase activity	3	46	0.0155116	0.153685	ENSBGRG00000011253(EHMT1),ENSBGRG00000016971(NSD3),ENSBGRG00000019016(SETD3)
BP	GO:0052547	regulation of peptidase activity	27	186	ENSBGRG00000000221(F3),ENSBGRG00000002134(CAV1),ENSBGRG00000003405(NOD1),ENSBGRG00000003951(AQP1),ENSBGRG00000005464(USP47),ENSBGRG00000005672(SRC),ENSBGRG00000005913(DAPK1),ENSBGRG00000007038(FASLG),ENSBGRG00000008014(CST7),ENSBGRG00000009029(EGLN3),ENSBGRG00000009451(HIP1),ENSBGRG00000010161(MTCH1),ENSBGRG00000010257(STAT3),ENSBGRG00000015017(SH3RF1),ENSBGRG00000016600(PDCD5),ENSBGRG00000017283…	0.00852505	0.214037												MF	GO:0030898	actin-dependent ATPase activity	2	17	0.0157626	0.153805	ENSBGRG00000007922(MYH6),ENSBGRG00000008351(MYH7)
BP	GO:0033137	negative regulation of peptidyl-serine phosphorylation	6	21	ENSBGRG00000002134(CAV1),ENSBGRG00000011880(MLXIPL),ENSBGRG00000012573(NCK2),ENSBGRG00000014122(PWP1),ENSBGRG00000020657(EPM2A),ENSBGRG00000025069(INPP5J)	0.00862727	0.214037												BP	GO:0071897	DNA biosynthetic process	7	233	0.0159406	0.251005	ENSBGRG00000002158(HMBOX1),ENSBGRG00000005231(NIBAN2),ENSBGRG00000013584(NOX4),ENSBGRG00000015028(DUSP1),ENSBGRG00000016159(NEK7),ENSBGRG00000025235(DBF4),ENSBGRG00000025394(NPLOC4)
BP	GO:0044060	regulation of endocrine process	6	21	ENSBGRG00000008588(REN),ENSBGRG00000015409(CRY1),ENSBGRG00000018911(RAB11FIP1),ENSBGRG00000019832(C1QTNF1),ENSBGRG00000023482(GALR1),ENSBGRG00000024537(SMAD4)	0.00862727	0.214037												BP	GO:0060322	head development	20	1069	0.0162739	0.2553	ENSBGRG00000005235(TENT2),ENSBGRG00000005984(CSNK1D),ENSBGRG00000006060(IGF1R),ENSBGRG00000007598(ZRANB1),ENSBGRG00000007622(SMAD1),ENSBGRG00000009216(BRWD1),ENSBGRG00000012411(LRBA),ENSBGRG00000012463(RERE),ENSBGRG00000015942(EBF1),ENSBGRG00000016018(ABR),ENSBGRG00000016568(ACSL3),ENSBGRG00000016974(NBEA),ENSBGRG00000018618(DOCK7),ENSBGRG00000020312(CPLANE1),ENSBGRG00000021550(IKZF1),ENSBGRG0000…
BP	GO:1902253	regulation of intrinsic apoptotic signaling pathway by p53 class mediator	6	21	ENSBGRG00000004564(ZNF385A),ENSBGRG00000009124(RRM2B),ENSBGRG00000010388(MSX1),ENSBGRG00000015642(PRKN),ENSBGRG00000020517(CD44),ENSBGRG00000026699	0.00862727	0.214037												BP	GO:0048638	regulation of developmental growth	15	727	0.016479	0.25756	ENSBGRG00000001761(IFRD1),ENSBGRG00000002944(TOMM70),ENSBGRG00000003960(ENAH),ENSBGRG00000006060(IGF1R),ENSBGRG00000008613(ENSBGRG00000008613),ENSBGRG00000015284(SPTBN1),ENSBGRG00000016568(ACSL3),ENSBGRG00000020056(DLG1),ENSBGRG00000021550(IKZF1),ENSBGRG00000021677(SYNCRIP),ENSBGRG00000022891(RAF1),ENSBGRG00000024270(FTO),ENSBGRG00000024536(BMP5),ENSBGRG00000024593(TGFBR2),ENSBGRG00000024679(PICA…
CC	GO:0031588	nucleotide-activated protein kinase complex	4	10	ENSBGRG00000000593(PRKAA2),ENSBGRG00000001150(PRKAG1),ENSBGRG00000010942(PRKAB2),ENSBGRG00000016630(PRKAB1)	0.00865755	0.336464												BP	GO:0032270	positive regulation of cellular protein metabolic process	30	1804	0.0168025	0.261405	ENSBGRG00000000262(BOLL),ENSBGRG00000002518(DDR2),ENSBGRG00000004461(LRRK1),ENSBGRG00000005984(CSNK1D),ENSBGRG00000006060(IGF1R),ENSBGRG00000007364(DENND2B),ENSBGRG00000007714(RNF144B),ENSBGRG00000008391(PRRC1),ENSBGRG00000008463(TLK1),ENSBGRG00000009278(TMEM67),ENSBGRG00000009644(PPP1R9A),ENSBGRG00000011253(EHMT1),ENSBGRG00000011586(ERCC6),ENSBGRG00000012799(FBXW8),ENSBGRG00000012856(UBE2D1),ENS…
BP	GO:0015732	prostaglandin transport	4	10	ENSBGRG00000010102(P2RX7),ENSBGRG00000013000(NOS2),ENSBGRG00000018786(PTGS2),ENSBGRG00000023249(LEP)	0.00872408	0.214037												BP	GO:0046847	filopodium assembly	5	133	0.0168492	0.261405	ENSBGRG00000000973(FGD6),ENSBGRG00000003960(ENAH),ENSBGRG00000008613(ENSBGRG00000008613),ENSBGRG00000009644(PPP1R9A),ENSBGRG00000017494(DOCK11)
BP	GO:0021520	spinal cord motor neuron cell fate specification	4	10	ENSBGRG00000002594(GLI2),ENSBGRG00000016979(HOXD10),ENSBGRG00000021292(ISL2),ENSBGRG00000024850(LHX3)	0.00872408	0.214037												BP	GO:0021534	cell proliferation in hindbrain	2	18	0.0169108	0.261405	ENSBGRG00000009216(BRWD1),ENSBGRG00000012463(RERE)
BP	GO:0042761	very long-chain fatty acid biosynthetic process	4	10	ENSBGRG00000001005(TECR),ENSBGRG00000004114(ELOVL4),ENSBGRG00000019509(ELOVL5),ENSBGRG00000025307(HACD3)	0.00872408	0.214037												BP	GO:0031146	SCF-dependent proteasomal ubiquitin-dependent protein catabolic process	3	49	0.0173797	0.265233	ENSBGRG00000002321(FBXO42),ENSBGRG00000022197(FBXL2),ENSBGRG00000026508(FBXL4)
BP	GO:0071380	cellular response to prostaglandin E stimulus	4	10	ENSBGRG00000000593(PRKAA2),ENSBGRG00000000673(ADCY6),ENSBGRG00000008823(P2RY4),ENSBGRG00000014792(ACACA)	0.00872408	0.214037												MF	GO:0070492	oligosaccharide binding	2	18	0.0176014	0.164401	ENSBGRG00000002518(DDR2),ENSBGRG00000006916(DCBLD1)
BP	GO:1901620	regulation of smoothened signaling pathway involved in dorsal/ventral neural tube patterning	4	10	ENSBGRG00000001167(PRKACB),ENSBGRG00000002594(GLI2),ENSBGRG00000014068(MKS1),ENSBGRG00000023559(PRKACA)	0.00872408	0.214037												MF	GO:0070696	transmembrane receptor protein serine/threonine kinase binding	2	18	0.0176014	0.164401	ENSBGRG00000016288(MAGI2),ENSBGRG00000024536(BMP5)
BP	GO:1903978	regulation of microglial cell activation	4	10	ENSBGRG00000004407(TAFA3),ENSBGRG00000005861(LDLR),ENSBGRG00000008014(CST7),ENSBGRG00000020463(NR1D1)	0.00872408	0.214037												BP	GO:0008104	protein localization	45	2979	0.0176209	0.265233	ENSBGRG00000000629(GNPTAB),ENSBGRG00000001141(ABCA1),ENSBGRG00000001728(ITPR2),ENSBGRG00000001896(DENND4C),ENSBGRG00000002944(TOMM70),ENSBGRG00000003322(WDR33),ENSBGRG00000004274(RABGAP1L),ENSBGRG00000004626(CBLB),ENSBGRG00000005343(ENSBGRG00000005343),ENSBGRG00000005379(ATG5),ENSBGRG00000005984(CSNK1D),ENSBGRG00000006060(IGF1R),ENSBGRG00000006248(PIKFYVE),ENSBGRG00000007817(ATP6V1C1),ENSBGRG0000…
BP	GO:0006855	drug transmembrane transport	11	55	ENSBGRG00000003951(AQP1),ENSBGRG00000006751(SLC7A1),ENSBGRG00000007419(SLC25A32),ENSBGRG00000008855(CLN8),ENSBGRG00000010376(SLC15A4),ENSBGRG00000011584(ACE2),ENSBGRG00000016741(SLC1A6),ENSBGRG00000017235(SLC38A5),ENSBGRG00000020657(EPM2A),ENSBGRG00000021961(SLC13A3),ENSBGRG00000024776(SLC13A2)	0.00874873	0.214037												BP	GO:0061515	myeloid cell development	4	89	0.0176718	0.265233	ENSBGRG00000004274(RABGAP1L),ENSBGRG00000004461(LRRK1),ENSBGRG00000007622(SMAD1),ENSBGRG00000024816(ADGRF5)
BP	GO:0071326	cellular response to monosaccharide stimulus	11	55	ENSBGRG00000000593(PRKAA2),ENSBGRG00000001895(ZBTB20),ENSBGRG00000004306,ENSBGRG00000007178(SLC12A7),ENSBGRG00000007842(KLF7),ENSBGRG00000011880(MLXIPL),ENSBGRG00000013811(CDK16),ENSBGRG00000020463(NR1D1),ENSBGRG00000023559(PRKACA),ENSBGRG00000023716(SIN3A),ENSBGRG00000025005(CCDC186)	0.00874873	0.214037												BP	GO:0098876	vesicle-mediated transport to the plasma membrane	4	89	0.0176718	0.265233	ENSBGRG00000001896(DENND4C),ENSBGRG00000015284(SPTBN1),ENSBGRG00000016568(ACSL3),ENSBGRG00000024953(DENND4A)
BP	GO:0071331	cellular response to hexose stimulus	11	55	ENSBGRG00000000593(PRKAA2),ENSBGRG00000001895(ZBTB20),ENSBGRG00000004306,ENSBGRG00000007178(SLC12A7),ENSBGRG00000007842(KLF7),ENSBGRG00000011880(MLXIPL),ENSBGRG00000013811(CDK16),ENSBGRG00000020463(NR1D1),ENSBGRG00000023559(PRKACA),ENSBGRG00000023716(SIN3A),ENSBGRG00000025005(CCDC186)	0.00874873	0.214037												BP	GO:0032956	regulation of actin cytoskeleton organization	10	413	0.0178885	0.265233	ENSBGRG00000003960(ENAH),ENSBGRG00000004749(MYL1),ENSBGRG00000005984(CSNK1D),ENSBGRG00000008613(ENSBGRG00000008613),ENSBGRG00000009644(PPP1R9A),ENSBGRG00000011309(ARHGAP18),ENSBGRG00000013584(NOX4),ENSBGRG00000020056(DLG1),ENSBGRG00000024593(TGFBR2),ENSBGRG00000024670(LMOD2)
MF	GO:0140297	DNA-binding transcription factor binding	42	329	ENSBGRG00000000213(NFE2L2),ENSBGRG00000000542(CRTC1),ENSBGRG00000000867(IKZF4),ENSBGRG00000001789(STAT1),ENSBGRG00000001845(KAT2B),ENSBGRG00000003739(ETS2),ENSBGRG00000003766(HOXC13),ENSBGRG00000003782(COMMD7),ENSBGRG00000004281(HDAC5),ENSBGRG00000005119(TTC8),ENSBGRG00000005223(PARP1),ENSBGRG00000005831(KLF5),ENSBGRG00000006023(FHL2),ENSBGRG00000006370(BBS5),ENSBGRG00000006794(UHRF2),ENSBGRG0000…	0.00879872	0.237402												MF	GO:0005515	protein binding	99	7488	0.0178928	0.164401	ENSBGRG00000000139(SON),ENSBGRG00000000599(ENSBGRG00000000599),ENSBGRG00000000973(FGD6),ENSBGRG00000001141(ABCA1),ENSBGRG00000001728(ITPR2),ENSBGRG00000001761(IFRD1),ENSBGRG00000001896(DENND4C),ENSBGRG00000002158(HMBOX1),ENSBGRG00000002518(DDR2),ENSBGRG00000002693(APBB2),ENSBGRG00000002824(USP33),ENSBGRG00000003783(SPTB),ENSBGRG00000003960(ENAH),ENSBGRG00000004086(DENND5B),ENSBGRG00000004274(RABG…
BP	GO:0022409	positive regulation of cell-cell adhesion	26	178	ENSBGRG00000000461(NR4A3),ENSBGRG00000001078(WNT10B),ENSBGRG00000002134(CAV1),ENSBGRG00000002633(PPP3CA),ENSBGRG00000006267(PDCD1LG2),ENSBGRG00000006751(SLC7A1),ENSBGRG00000007174(FOXO3),ENSBGRG00000008403(SOX13),ENSBGRG00000008735(FUT7),ENSBGRG00000012246(ICOS),ENSBGRG00000012573(NCK2),ENSBGRG00000013085(EGR3),ENSBGRG00000015117(ADAM19),ENSBGRG00000015126(DNAJA3),ENSBGRG00000015313(ADAM8),ENSBGR…	0.0089791	0.21894												BP	GO:0061564	axon development	18	941	0.0182039	0.265233	ENSBGRG00000001761(IFRD1),ENSBGRG00000002518(DDR2),ENSBGRG00000002824(USP33),ENSBGRG00000003783(SPTB),ENSBGRG00000003960(ENAH),ENSBGRG00000005231(NIBAN2),ENSBGRG00000006060(IGF1R),ENSBGRG00000008613(ENSBGRG00000008613),ENSBGRG00000010459(CDK19),ENSBGRG00000012099(LAMA2),ENSBGRG00000015284(SPTBN1),ENSBGRG00000016568(ACSL3),ENSBGRG00000016848(ANOS1),ENSBGRG00000018618(DOCK7),ENSBGRG00000018952(TRAK…
BP	GO:0006403	RNA localization	17	102	ENSBGRG00000000428(ATR),ENSBGRG00000000785(DDX39A),ENSBGRG00000003435,ENSBGRG00000004564(ZNF385A),ENSBGRG00000008161,ENSBGRG00000011128(EXOSC10),ENSBGRG00000011274(DHX9),ENSBGRG00000012521(POLDIP3),ENSBGRG00000012999(PRPF6),ENSBGRG00000014113(ATM),ENSBGRG00000015906(SDAD1),ENSBGRG00000017200(ALKBH5),ENSBGRG00000017777(DKC1),ENSBGRG00000018777(THOC1),ENSBGRG00000019513(NCBP2),ENSBGRG00000026089(PA…	0.00905006	0.219583												BP	GO:0002088	lens development in camera-type eye	4	90	0.0183368	0.265233	ENSBGRG00000015847(PDS5B),ENSBGRG00000020056(DLG1),ENSBGRG00000021952(INTS7),ENSBGRG00000024593(TGFBR2)
BP	GO:0003333	amino acid transmembrane transport	10	48	ENSBGRG00000002454(LRRC8D),ENSBGRG00000005554(SLC43A1),ENSBGRG00000006751(SLC7A1),ENSBGRG00000008855(CLN8),ENSBGRG00000010376(SLC15A4),ENSBGRG00000011584(ACE2),ENSBGRG00000016741(SLC1A6),ENSBGRG00000017235(SLC38A5),ENSBGRG00000019545(SLC6A6),ENSBGRG00000020657(EPM2A)	0.00910751	0.219583												BP	GO:0051898	negative regulation of protein kinase B signaling	3	50	0.0183404	0.265233	ENSBGRG00000006060(IGF1R),ENSBGRG00000016288(MAGI2),ENSBGRG00000020056(DLG1)
BP	GO:0001936	regulation of endothelial cell proliferation	16	94	ENSBGRG00000000221(F3),ENSBGRG00000001789(STAT1),ENSBGRG00000002134(CAV1),ENSBGRG00000003096(PROK1),ENSBGRG00000006109(FLT4),ENSBGRG00000007412(AGGF1),ENSBGRG00000010257(STAT3),ENSBGRG00000010536(FGF2),ENSBGRG00000010846(STAT5A),ENSBGRG00000013085(EGR3),ENSBGRG00000013093(FGF7),ENSBGRG00000016956(IL12B),ENSBGRG00000017354(BMPR2),ENSBGRG00000023249(LEP),ENSBGRG00000023500(NGFR),ENSBGRG00000024466(…	0.0091239	0.219583												BP	GO:0085029	extracellular matrix assembly	3	50	0.0183404	0.265233	ENSBGRG00000001896(DENND4C),ENSBGRG00000015359(THSD4),ENSBGRG00000024953(DENND4A)
BP	GO:0000122	negative regulation of transcription by RNA polymerase II	69	580	ENSBGRG00000000061(GABPA),ENSBGRG00000001078(WNT10B),ENSBGRG00000001485(NFX1),ENSBGRG00000001895(ZBTB20),ENSBGRG00000002070(GLIS1),ENSBGRG00000002134(CAV1),ENSBGRG00000002337(ETV5),ENSBGRG00000002538(SMAD5),ENSBGRG00000002594(GLI2),ENSBGRG00000002783(RORC),ENSBGRG00000002796(HDAC10),ENSBGRG00000003307(TBL1XR1),ENSBGRG00000003739(ETS2),ENSBGRG00000003804(CDC73),ENSBGRG00000004042(OSR2),ENSBGRG0000…	0.00912555	0.219583												MF	GO:0016278	lysine N-methyltransferase activity	3	49	0.0183667	0.164401	ENSBGRG00000011253(EHMT1),ENSBGRG00000016971(NSD3),ENSBGRG00000019016(SETD3)
MF	GO:0016746	transferase activity, transferring acyl groups	27	191	ENSBGRG00000000977(CERS1),ENSBGRG00000001676(ZDHHC23),ENSBGRG00000001845(KAT2B),ENSBGRG00000002491,ENSBGRG00000004114(ELOVL4),ENSBGRG00000004770(CERS3),ENSBGRG00000005732(NAA30),ENSBGRG00000008689(ZDHHC18),ENSBGRG00000008893(METTL8),ENSBGRG00000009715(SPTLC3),ENSBGRG00000011798(CHAT),ENSBGRG00000012169(YKT6),ENSBGRG00000013862(QPCT),ENSBGRG00000014114(HGSNAT),ENSBGRG00000015026(ZDHHC7),ENSBGRG000…	0.00912791	0.241807												MF	GO:0016279	protein-lysine N-methyltransferase activity	3	49	0.0183667	0.164401	ENSBGRG00000011253(EHMT1),ENSBGRG00000016971(NSD3),ENSBGRG00000019016(SETD3)
BP	GO:0032103	positive regulation of response to external stimulus	37	277	ENSBGRG00000001666(CASP6),ENSBGRG00000002486(XRCC5),ENSBGRG00000002944(TOMM70),ENSBGRG00000003405(NOD1),ENSBGRG00000004407(TAFA3),ENSBGRG00000005861(LDLR),ENSBGRG00000006153(FCN1),ENSBGRG00000009042(RIPK1),ENSBGRG00000010257(STAT3),ENSBGRG00000010308(ADAM10),ENSBGRG00000010376(SLC15A4),ENSBGRG00000010536(FGF2),ENSBGRG00000010905(VEGFD),ENSBGRG00000011045(LSM14A),ENSBGRG00000012192(NTRK3),ENSBGRG0…	0.00928102	0.222592												CC	GO:0043227	membrane-bounded organelle	129	10624	0.018559	0.26377	ENSBGRG00000000139(SON),ENSBGRG00000000262(BOLL),ENSBGRG00000000266(PROS1),ENSBGRG00000000599(ENSBGRG00000000599),ENSBGRG00000000629(GNPTAB),ENSBGRG00000000973(FGD6),ENSBGRG00000001023(TBXAS1),ENSBGRG00000001141(ABCA1),ENSBGRG00000001484(SEC24B),ENSBGRG00000001728(ITPR2),ENSBGRG00000001761(IFRD1),ENSBGRG00000001896(DENND4C),ENSBGRG00000002158(HMBOX1),ENSBGRG00000002693(APBB2),ENSBGRG00000002824(U…
BP	GO:0044267	cellular protein metabolic process	344	3444	ENSBGRG00000000074(N6AMT1),ENSBGRG00000000197(EPHA3),ENSBGRG00000000203(DDOST),ENSBGRG00000000213(NFE2L2),ENSBGRG00000000221(F3),ENSBGRG00000000428(ATR),ENSBGRG00000000440(PYM1),ENSBGRG00000000593(PRKAA2),ENSBGRG00000000711(METAP2),ENSBGRG00000000726(PPIE),ENSBGRG00000000764(CDKN1B),ENSBGRG00000000918(STK36),ENSBGRG00000001078(WNT10B),ENSBGRG00000001111(C9orf72),ENSBGRG00000001150(PRKAG1),ENSBGRG…	0.00932441	0.222902												BP	GO:0032940	secretion by cell	29	1743	0.0185836	0.265233	ENSBGRG00000000266(PROS1),ENSBGRG00000000629(GNPTAB),ENSBGRG00000001141(ABCA1),ENSBGRG00000001728(ITPR2),ENSBGRG00000001896(DENND4C),ENSBGRG00000005231(NIBAN2),ENSBGRG00000005379(ATG5),ENSBGRG00000005984(CSNK1D),ENSBGRG00000008227(UBR5),ENSBGRG00000008434(UBE2Q1),ENSBGRG00000009140(PRKCH),ENSBGRG00000009644(PPP1R9A),ENSBGRG00000010412(ATP2A2),ENSBGRG00000012550(ATP8B4),ENSBGRG00000014267(DNAJC5),…
BP	GO:2001237	negative regulation of extrinsic apoptotic signaling pathway	12	63	ENSBGRG00000000962(MCL1),ENSBGRG00000005672(SRC),ENSBGRG00000007498(ZC3HC1),ENSBGRG00000007850(TERT),ENSBGRG00000009042(RIPK1),ENSBGRG00000010012(AR),ENSBGRG00000010970(ITGA6),ENSBGRG00000011285(PAK5),ENSBGRG00000012869(EYA1),ENSBGRG00000015017(SH3RF1),ENSBGRG00000023016(MAPK7),ENSBGRG00000025440(SERPINE1)	0.00939483	0.223347												BP	GO:0055001	muscle cell development	8	297	0.0186907	0.265233	ENSBGRG00000002944(TOMM70),ENSBGRG00000005231(NIBAN2),ENSBGRG00000005379(ATG5),ENSBGRG00000010412(ATP2A2),ENSBGRG00000013023(RAPGEF1),ENSBGRG00000021574(ANKRD17),ENSBGRG00000022578(CFLAR),ENSBGRG00000024670(LMOD2)
MF	GO:0005524	ATP binding	115	1061	ENSBGRG00000000197(EPHA3),ENSBGRG00000000250(ATP13A5),ENSBGRG00000000593(PRKAA2),ENSBGRG00000000785(DDX39A),ENSBGRG00000000918(STK36),ENSBGRG00000000920(ZRANB3),ENSBGRG00000001167(PRKACB),ENSBGRG00000001329(STK17B),ENSBGRG00000001424(LONP1),ENSBGRG00000001473(GUCY2C),ENSBGRG00000001479(ATP6V1A),ENSBGRG00000001627(MYO1B),ENSBGRG00000001771(DDX46),ENSBGRG00000001869(DTYMK),ENSBGRG00000002563(KIF3A)…	0.00940133	0.243884												BP	GO:0046683	response to organophosphorus	6	187	0.0187041	0.265233	ENSBGRG00000000599(ENSBGRG00000000599),ENSBGRG00000001728(ITPR2),ENSBGRG00000013584(NOX4),ENSBGRG00000014876(ATP7B),ENSBGRG00000015028(DUSP1),ENSBGRG00000024381(EEF2K)
BP	GO:0002376	immune system process	164	1540	ENSBGRG00000000061(GABPA),ENSBGRG00000000131(IFNAR2),ENSBGRG00000000213(NFE2L2),ENSBGRG00000000215(PLCL2),ENSBGRG00000000766(TRIM35),ENSBGRG00000001078(WNT10B),ENSBGRG00000001347(LMBR1L),ENSBGRG00000001621(AQP3),ENSBGRG00000001666(CASP6),ENSBGRG00000001789(STAT1),ENSBGRG00000001929(EPS8),ENSBGRG00000001978(TGFBR3),ENSBGRG00000001988(FCRLB),ENSBGRG00000002134(CAV1),ENSBGRG00000002374(IL9),ENSBGRG0…	0.00940408	0.223347												BP	GO:0008069	dorsal/ventral axis specification, ovarian follicular epithelium	2	19	0.018763	0.265233	ENSBGRG00000004626(CBLB),ENSBGRG00000022891(RAF1)
BP	GO:0046942	carboxylic acid transport	26	179	ENSBGRG00000000405(MFSD2A),ENSBGRG00000002454(LRRC8D),ENSBGRG00000004372(NTRK2),ENSBGRG00000005071,ENSBGRG00000005175,ENSBGRG00000005554(SLC43A1),ENSBGRG00000006751(SLC7A1),ENSBGRG00000007419(SLC25A32),ENSBGRG00000007536(SLC6A19),ENSBGRG00000008855(CLN8),ENSBGRG00000010102(P2RX7),ENSBGRG00000010236,ENSBGRG00000010376(SLC15A4),ENSBGRG00000011584(ACE2),ENSBGRG00000013000(NOS2),ENSBGRG00000016741(SL…	0.00963652	0.228127												BP	GO:0018410	C-terminal protein amino acid modification	2	19	0.018763	0.265233	ENSBGRG00000005379(ATG5),ENSBGRG00000011876(AGBL1)
MF	GO:0003676	nucleic acid binding	237	2355	ENSBGRG00000000061(GABPA),ENSBGRG00000000074(N6AMT1),ENSBGRG00000000174,ENSBGRG00000000213(NFE2L2),ENSBGRG00000000235,ENSBGRG00000000283(HP1BP3),ENSBGRG00000000285(CIART),ENSBGRG00000000341(RBM45),ENSBGRG00000000351(EEPD1),ENSBGRG00000000420(EIF4G3),ENSBGRG00000000461(NR4A3),ENSBGRG00000000726(PPIE),ENSBGRG00000000785(DDX39A),ENSBGRG00000000867(IKZF4),ENSBGRG00000000920(ZRANB3),ENSBGRG00000001195…	0.00965803	0.243884												BP	GO:0039531	regulation of viral-induced cytoplasmic pattern recognition receptor signaling pathway	2	19	0.018763	0.265233	ENSBGRG00000021574(ANKRD17),ENSBGRG00000025394(NPLOC4)
BP	GO:0010038	response to metal ion	21	136	ENSBGRG00000000213(NFE2L2),ENSBGRG00000000593(PRKAA2),ENSBGRG00000000764(CDKN1B),ENSBGRG00000002134(CAV1),ENSBGRG00000002429(AHCYL1),ENSBGRG00000002633(PPP3CA),ENSBGRG00000003951(AQP1),ENSBGRG00000007301(CLIC4),ENSBGRG00000007753(CACNA1G),ENSBGRG00000008772(GSS),ENSBGRG00000010102(P2RX7),ENSBGRG00000012269(TIGAR),ENSBGRG00000013237(CPNE3),ENSBGRG00000014876(ATP7B),ENSBGRG00000019275(PLCG2),ENSBGR…	0.00969244	0.22871												BP	GO:0070831	basement membrane assembly	2	19	0.018763	0.265233	ENSBGRG00000001896(DENND4C),ENSBGRG00000024953(DENND4A)
MF	GO:0019899	enzyme binding	155	1480	ENSBGRG00000000131(IFNAR2),ENSBGRG00000000221(F3),ENSBGRG00000000461(NR4A3),ENSBGRG00000000520(DPYSL2),ENSBGRG00000000673(ADCY6),ENSBGRG00000000764(CDKN1B),ENSBGRG00000001004(VDAC1),ENSBGRG00000001111(C9orf72),ENSBGRG00000001150(PRKAG1),ENSBGRG00000001167(PRKACB),ENSBGRG00000001422(RPAP2),ENSBGRG00000001424(LONP1),ENSBGRG00000001452(TUBA1B),ENSBGRG00000001789(STAT1),ENSBGRG00000001845(KAT2B),ENSB…	0.00970848	0.243884												BP	GO:0006942	regulation of striated muscle contraction	4	91	0.0190173	0.265233	ENSBGRG00000007922(MYH6),ENSBGRG00000008351(MYH7),ENSBGRG00000010412(ATP2A2),ENSBGRG00000020056(DLG1)
BP	GO:0001932	regulation of protein phosphorylation	97	859	ENSBGRG00000000764(CDKN1B),ENSBGRG00000001111(C9orf72),ENSBGRG00000001150(PRKAG1),ENSBGRG00000001845(KAT2B),ENSBGRG00000002134(CAV1),ENSBGRG00000002486(XRCC5),ENSBGRG00000003096(PROK1),ENSBGRG00000003251(GLIPR2),ENSBGRG00000003405(NOD1),ENSBGRG00000003668(APOA1),ENSBGRG00000004146(RNF149),ENSBGRG00000004203(SEMA7A),ENSBGRG00000004372(NTRK2),ENSBGRG00000004717(ITGA5),ENSBGRG00000004989(ACVR2A),ENS…	0.00990341	0.232937												BP	GO:0050766	positive regulation of phagocytosis	4	91	0.0190173	0.265233	ENSBGRG00000000266(PROS1),ENSBGRG00000016018(ABR),ENSBGRG00000021365(PIK3C3),ENSBGRG00000021443(ANO6)
MF	GO:0046872	metal ion binding	174	1682	ENSBGRG00000000266(PROS1),ENSBGRG00000000461(NR4A3),ENSBGRG00000000766(TRIM35),ENSBGRG00000000770(ECE1),ENSBGRG00000000812(SNED1),ENSBGRG00000000867(IKZF4),ENSBGRG00000000906(CYP4X1),ENSBGRG00000000909(FSTL4),ENSBGRG00000001167(PRKACB),ENSBGRG00000001485(NFX1),ENSBGRG00000001510(TENM2),ENSBGRG00000001912(D2HGDH),ENSBGRG00000002448(MARCHF4),ENSBGRG00000002613(ZC3HAV1),ENSBGRG00000002717,ENSBGRG000…	0.00994877	0.245684												BP	GO:0008154	actin polymerization or depolymerization	7	242	0.0192055	0.265233	ENSBGRG00000003960(ENAH),ENSBGRG00000005984(CSNK1D),ENSBGRG00000008613(ENSBGRG00000008613),ENSBGRG00000009644(PPP1R9A),ENSBGRG00000011309(ARHGAP18),ENSBGRG00000020056(DLG1),ENSBGRG00000024670(LMOD2)
BP	GO:0022604	regulation of cell morphogenesis	35	260	ENSBGRG00000000405(MFSD2A),ENSBGRG00000000520(DPYSL2),ENSBGRG00000000909(FSTL4),ENSBGRG00000001761(IFRD1),ENSBGRG00000001905(TBCCD1),ENSBGRG00000001929(EPS8),ENSBGRG00000002633(PPP3CA),ENSBGRG00000003668(APOA1),ENSBGRG00000004203(SEMA7A),ENSBGRG00000005672(SRC),ENSBGRG00000006057(RND2),ENSBGRG00000006423(MYOC),ENSBGRG00000007471(RHOQ),ENSBGRG00000008697(KEL),ENSBGRG00000009134(GORASP1),ENSBGRG000…	0.00996227	0.233571												BP	GO:0060048	cardiac muscle contraction	5	138	0.0194449	0.265233	ENSBGRG00000004749(MYL1),ENSBGRG00000007922(MYH6),ENSBGRG00000008351(MYH7),ENSBGRG00000010412(ATP2A2),ENSBGRG00000020056(DLG1)
BP	GO:0032637	interleukin-8 production	11	56	ENSBGRG00000000221(F3),ENSBGRG00000003405(NOD1),ENSBGRG00000006153(FCN1),ENSBGRG00000009042(RIPK1),ENSBGRG00000010257(STAT3),ENSBGRG00000012746(CRP),ENSBGRG00000013000(NOS2),ENSBGRG00000019776(CLEC7A),ENSBGRG00000022744(PYCARD),ENSBGRG00000023249(LEP),ENSBGRG00000025440(SERPINE1)	0.0100281	0.233616												BP	GO:0051247	positive regulation of protein metabolic process	31	1902	0.0195731	0.265233	ENSBGRG00000000262(BOLL),ENSBGRG00000002518(DDR2),ENSBGRG00000004461(LRRK1),ENSBGRG00000004626(CBLB),ENSBGRG00000005984(CSNK1D),ENSBGRG00000006060(IGF1R),ENSBGRG00000007364(DENND2B),ENSBGRG00000007714(RNF144B),ENSBGRG00000008391(PRRC1),ENSBGRG00000008463(TLK1),ENSBGRG00000009278(TMEM67),ENSBGRG00000009644(PPP1R9A),ENSBGRG00000011253(EHMT1),ENSBGRG00000011586(ERCC6),ENSBGRG00000012799(FBXW8),ENSBG…
BP	GO:0032677	regulation of interleukin-8 production	11	56	ENSBGRG00000000221(F3),ENSBGRG00000003405(NOD1),ENSBGRG00000006153(FCN1),ENSBGRG00000009042(RIPK1),ENSBGRG00000010257(STAT3),ENSBGRG00000012746(CRP),ENSBGRG00000013000(NOS2),ENSBGRG00000019776(CLEC7A),ENSBGRG00000022744(PYCARD),ENSBGRG00000023249(LEP),ENSBGRG00000025440(SERPINE1)	0.0100281	0.233616												BP	GO:0040008	regulation of growth	21	1162	0.0197546	0.265233	ENSBGRG00000001761(IFRD1),ENSBGRG00000002693(APBB2),ENSBGRG00000002944(TOMM70),ENSBGRG00000003960(ENAH),ENSBGRG00000005984(CSNK1D),ENSBGRG00000006060(IGF1R),ENSBGRG00000008613(ENSBGRG00000008613),ENSBGRG00000015284(SPTBN1),ENSBGRG00000016568(ACSL3),ENSBGRG00000019016(SETD3),ENSBGRG00000019951(CATHL6),ENSBGRG00000020056(DLG1),ENSBGRG00000020148(FHL1),ENSBGRG00000020321(ENSBGRG00000020321),ENSBGRG0…
BP	GO:0030177	positive regulation of Wnt signaling pathway	16	95	ENSBGRG00000001078(WNT10B),ENSBGRG00000002134(CAV1),ENSBGRG00000003307(TBL1XR1),ENSBGRG00000003804(CDC73),ENSBGRG00000005464(USP47),ENSBGRG00000005672(SRC),ENSBGRG00000005984(CSNK1D),ENSBGRG00000006342(RSPO1),ENSBGRG00000007368(FAM53B),ENSBGRG00000007850(TERT),ENSBGRG00000010536(FGF2),ENSBGRG00000014984(PRDM15),ENSBGRG00000017585(WNK1),ENSBGRG00000023662(DAAM2),ENSBGRG00000025200(MBD2),ENSBGRG000…	0.0100849	0.234194												MF	GO:0004842	ubiquitin-protein transferase activity	10	413	0.0202366	0.164401	ENSBGRG00000004626(CBLB),ENSBGRG00000007714(RNF144B),ENSBGRG00000008227(UBR5),ENSBGRG00000008434(UBE2Q1),ENSBGRG00000012799(FBXW8),ENSBGRG00000012856(UBE2D1),ENSBGRG00000013378(FEM1C),ENSBGRG00000014000(ASB3),ENSBGRG00000022197(FBXL2),ENSBGRG00000026508(FBXL4)
BP	GO:0044089	positive regulation of cellular component biogenesis	48	381	ENSBGRG00000000428(ATR),ENSBGRG00000000587(GPSM2),ENSBGRG00000000764(CDKN1B),ENSBGRG00000001078(WNT10B),ENSBGRG00000001750(ADGRL2),ENSBGRG00000002134(CAV1),ENSBGRG00000003534(ACTR3),ENSBGRG00000003668(APOA1),ENSBGRG00000004372(NTRK2),ENSBGRG00000005204(AJUBA),ENSBGRG00000005442(CYFIP1),ENSBGRG00000005672(SRC),ENSBGRG00000006423(MYOC),ENSBGRG00000007471(RHOQ),ENSBGRG00000007480(KCTD17),ENSBGRG0000…	0.0101217	0.234304												BP	GO:0040007	growth	28	1680	0.0202543	0.265233	ENSBGRG00000001761(IFRD1),ENSBGRG00000002518(DDR2),ENSBGRG00000002693(APBB2),ENSBGRG00000002944(TOMM70),ENSBGRG00000003960(ENAH),ENSBGRG00000005984(CSNK1D),ENSBGRG00000006060(IGF1R),ENSBGRG00000007622(SMAD1),ENSBGRG00000008227(UBR5),ENSBGRG00000008613(ENSBGRG00000008613),ENSBGRG00000015284(SPTBN1),ENSBGRG00000016159(NEK7),ENSBGRG00000016288(MAGI2),ENSBGRG00000016568(ACSL3),ENSBGRG00000016848(ANOS…
BP	GO:0048665	neuron fate specification	7	28	ENSBGRG00000002594(GLI2),ENSBGRG00000008234(DMRTA2),ENSBGRG00000008619(SIX1),ENSBGRG00000012869(EYA1),ENSBGRG00000016979(HOXD10),ENSBGRG00000021292(ISL2),ENSBGRG00000024850(LHX3)	0.0101674	0.23462												BP	GO:0045887	positive regulation of synaptic growth at neuromuscular junction	3	52	0.0203487	0.265233	ENSBGRG00000006060(IGF1R),ENSBGRG00000008613(ENSBGRG00000008613),ENSBGRG00000024536(BMP5)
BP	GO:0002520	immune system development	76	652	ENSBGRG00000000061(GABPA),ENSBGRG00000000213(NFE2L2),ENSBGRG00000000215(PLCL2),ENSBGRG00000001078(WNT10B),ENSBGRG00000001347(LMBR1L),ENSBGRG00000001789(STAT1),ENSBGRG00000002486(XRCC5),ENSBGRG00000002538(SMAD5),ENSBGRG00000002633(PPP3CA),ENSBGRG00000002910(C12orf29),ENSBGRG00000003430(C1QC),ENSBGRG00000003804(CDC73),ENSBGRG00000004564(ZNF385A),ENSBGRG00000004989(ACVR2A),ENSBGRG00000005369(FLT3),E…	0.0103797	0.238765												BP	GO:0007596	blood coagulation	8	302	0.0204277	0.265233	ENSBGRG00000000266(PROS1),ENSBGRG00000001728(ITPR2),ENSBGRG00000005383(DGKH),ENSBGRG00000009140(PRKCH),ENSBGRG00000017494(DOCK11),ENSBGRG00000021443(ANO6),ENSBGRG00000022862(DOCK9),ENSBGRG00000022891(RAF1)
BP	GO:0051604	protein maturation	27	189	ENSBGRG00000000221(F3),ENSBGRG00000000711(METAP2),ENSBGRG00000000770(ECE1),ENSBGRG00000001167(PRKACB),ENSBGRG00000001666(CASP6),ENSBGRG00000001845(KAT2B),ENSBGRG00000005672(SRC),ENSBGRG00000005732(NAA30),ENSBGRG00000006217(XPNPEP3),ENSBGRG00000008014(CST7),ENSBGRG00000008322(PRDX4),ENSBGRG00000008588(REN),ENSBGRG00000010102(P2RX7),ENSBGRG00000010308(ADAM10),ENSBGRG00000012348(YIPF5),ENSBGRG000000…	0.0104742	0.240184												CC	GO:1902494	catalytic complex	25	1493	0.0204796	0.26377	ENSBGRG00000002321(FBXO42),ENSBGRG00000002824(USP33),ENSBGRG00000005235(TENT2),ENSBGRG00000005379(ATG5),ENSBGRG00000007714(RNF144B),ENSBGRG00000009157(DCAF17),ENSBGRG00000010412(ATP2A2),ENSBGRG00000010600(PGGT1B),ENSBGRG00000012463(RERE),ENSBGRG00000012799(FBXW8),ENSBGRG00000012856(UBE2D1),ENSBGRG00000013378(FEM1C),ENSBGRG00000013584(NOX4),ENSBGRG00000013819(INTS10),ENSBGRG00000014000(ASB3),ENSBG…
BP	GO:0007004	telomere maintenance via telomerase	10	49	ENSBGRG00000002486(XRCC5),ENSBGRG00000005672(SRC),ENSBGRG00000007192(TERF2),ENSBGRG00000007850(TERT),ENSBGRG00000011128(EXOSC10),ENSBGRG00000014113(ATM),ENSBGRG00000017777(DKC1),ENSBGRG00000019234(NAT10),ENSBGRG00000025654(TNKS),ENSBGRG00000026089(PARN)	0.0105466	0.241089												BP	GO:0007010	cytoskeleton organization	28	1683	0.0206874	0.265233	ENSBGRG00000000139(SON),ENSBGRG00000000973(FGD6),ENSBGRG00000002824(USP33),ENSBGRG00000003960(ENAH),ENSBGRG00000004149(PTBP3),ENSBGRG00000004749(MYL1),ENSBGRG00000005235(TENT2),ENSBGRG00000005984(CSNK1D),ENSBGRG00000006051(CDC42BPA),ENSBGRG00000007598(ZRANB1),ENSBGRG00000008613(ENSBGRG00000008613),ENSBGRG00000009278(TMEM67),ENSBGRG00000009644(PPP1R9A),ENSBGRG00000011309(ARHGAP18),ENSBGRG000000130…
BP	GO:0048468	cell development	145	1349	ENSBGRG00000000174,ENSBGRG00000000197(EPHA3),ENSBGRG00000000405(MFSD2A),ENSBGRG00000000520(DPYSL2),ENSBGRG00000000682(CECR2),ENSBGRG00000000770(ECE1),ENSBGRG00000000909(FSTL4),ENSBGRG00000001070(ATXN10),ENSBGRG00000001078(WNT10B),ENSBGRG00000001111(C9orf72),ENSBGRG00000001761(IFRD1),ENSBGRG00000001923(GAP43),ENSBGRG00000002486(XRCC5),ENSBGRG00000002538(SMAD5),ENSBGRG00000002594(GLI2),ENSBGRG00000…	0.0105934	0.241403												BP	GO:0002643	regulation of tolerance induction	2	20	0.0206965	0.265233	ENSBGRG00000004626(CBLB),ENSBGRG00000024593(TGFBR2)
CC	GO:0016607	nuclear speck	36	271	ENSBGRG00000000283(HP1BP3),ENSBGRG00000000593(PRKAA2),ENSBGRG00000000726(PPIE),ENSBGRG00000000785(DDX39A),ENSBGRG00000001771(DDX46),ENSBGRG00000001954(ZNF395),ENSBGRG00000002039(HOXA6),ENSBGRG00000002594(GLI2),ENSBGRG00000004281(HDAC5),ENSBGRG00000007850(TERT),ENSBGRG00000009636(DOCK1),ENSBGRG00000009889(ATP6V0A1),ENSBGRG00000010012(AR),ENSBGRG00000010569(STK17A),ENSBGRG00000011891(SRSF6),ENSBGRG…	0.0106689	0.396605												BP	GO:0030002	cellular anion homeostasis	2	20	0.0206965	0.265233	ENSBGRG00000001023(TBXAS1),ENSBGRG00000006350(GPCPD1)
MF	GO:0032559	adenyl ribonucleotide binding	118	1097	ENSBGRG00000000197(EPHA3),ENSBGRG00000000250(ATP13A5),ENSBGRG00000000593(PRKAA2),ENSBGRG00000000785(DDX39A),ENSBGRG00000000918(STK36),ENSBGRG00000000920(ZRANB3),ENSBGRG00000001150(PRKAG1),ENSBGRG00000001167(PRKACB),ENSBGRG00000001329(STK17B),ENSBGRG00000001424(LONP1),ENSBGRG00000001473(GUCY2C),ENSBGRG00000001479(ATP6V1A),ENSBGRG00000001627(MYO1B),ENSBGRG00000001771(DDX46),ENSBGRG00000001869(DTYMK…	0.0107523	0.258077												BP	GO:0030320	cellular monovalent inorganic anion homeostasis	2	20	0.0206965	0.265233	ENSBGRG00000001023(TBXAS1),ENSBGRG00000006350(GPCPD1)
BP	GO:0007063	regulation of sister chromatid cohesion	5	16	ENSBGRG00000003952(RAD21),ENSBGRG00000016038(ATRX),ENSBGRG00000020100(RB1),ENSBGRG00000025048(SLF2),ENSBGRG00000025654(TNKS)	0.0108914	0.245607												BP	GO:0097242	amyloid-beta clearance	2	20	0.0206965	0.265233	ENSBGRG00000006060(IGF1R),ENSBGRG00000024679(PICALM)
BP	GO:0019369	arachidonic acid metabolic process	5	16	ENSBGRG00000006714(CYP2U1),ENSBGRG00000018786(PTGS2),ENSBGRG00000025402(ALOX15),ENSBGRG00000025849(DAGLB),ENSBGRG00000026739(ALOXE3)	0.0108914	0.245607												CC	GO:0005737	cytoplasm	132	10946	0.0208097	0.26377	ENSBGRG00000000262(BOLL),ENSBGRG00000000266(PROS1),ENSBGRG00000000599(ENSBGRG00000000599),ENSBGRG00000000629(GNPTAB),ENSBGRG00000000973(FGD6),ENSBGRG00000001023(TBXAS1),ENSBGRG00000001141(ABCA1),ENSBGRG00000001484(SEC24B),ENSBGRG00000001728(ITPR2),ENSBGRG00000001761(IFRD1),ENSBGRG00000001896(DENND4C),ENSBGRG00000002158(HMBOX1),ENSBGRG00000002693(APBB2),ENSBGRG00000002824(USP33),ENSBGRG00000002944…
BP	GO:0036314	response to sterol	5	16	ENSBGRG00000001529(GRAMD1C),ENSBGRG00000002783(RORC),ENSBGRG00000010766(INSIG1),ENSBGRG00000013095(GRAMD1B),ENSBGRG00000019260(OSBPL7)	0.0108914	0.245607												BP	GO:0006928	movement of cell or subcellular component	39	2533	0.0209217	0.265233	ENSBGRG00000000266(PROS1),ENSBGRG00000002518(DDR2),ENSBGRG00000002824(USP33),ENSBGRG00000003783(SPTB),ENSBGRG00000003960(ENAH),ENSBGRG00000004626(CBLB),ENSBGRG00000004749(MYL1),ENSBGRG00000005231(NIBAN2),ENSBGRG00000006051(CDC42BPA),ENSBGRG00000006060(IGF1R),ENSBGRG00000006376(MEMO1),ENSBGRG00000007061(RRAS2),ENSBGRG00000007598(ZRANB1),ENSBGRG00000007922(MYH6),ENSBGRG00000008351(MYH7),ENSBGRG0000…
BP	GO:0060041	retina development in camera-type eye	17	104	ENSBGRG00000000405(MFSD2A),ENSBGRG00000002918(PFDN5),ENSBGRG00000004372(NTRK2),ENSBGRG00000005119(TTC8),ENSBGRG00000007301(CLIC4),ENSBGRG00000008855(CLN8),ENSBGRG00000009568(LAMC3),ENSBGRG00000010067(GDF11),ENSBGRG00000010257(STAT3),ENSBGRG00000010658(DLX1),ENSBGRG00000010765(DLX2),ENSBGRG00000011024(RHOJ),ENSBGRG00000011349(CNTF),ENSBGRG00000013920(NECTIN1),ENSBGRG00000016632(LAMB2),ENSBGRG00000…	0.0109411	0.245607												BP	GO:0050803	regulation of synapse structure or activity	10	424	0.021038	0.265233	ENSBGRG00000003960(ENAH),ENSBGRG00000006060(IGF1R),ENSBGRG00000008613(ENSBGRG00000008613),ENSBGRG00000009644(PPP1R9A),ENSBGRG00000015284(SPTBN1),ENSBGRG00000016568(ACSL3),ENSBGRG00000021677(SYNCRIP),ENSBGRG00000024381(EEF2K),ENSBGRG00000024536(BMP5),ENSBGRG00000024679(PICALM)
BP	GO:0006725	cellular aromatic compound metabolic process	383	3875	ENSBGRG00000000004(VGLL3),ENSBGRG00000000061(GABPA),ENSBGRG00000000074(N6AMT1),ENSBGRG00000000213(NFE2L2),ENSBGRG00000000235,ENSBGRG00000000283(HP1BP3),ENSBGRG00000000285(CIART),ENSBGRG00000000351(EEPD1),ENSBGRG00000000440(PYM1),ENSBGRG00000000461(NR4A3),ENSBGRG00000000535,ENSBGRG00000000542(CRTC1),ENSBGRG00000000645(GMNC),ENSBGRG00000000673(ADCY6),ENSBGRG00000000726(PPIE),ENSBGRG00000000764(CDKN…	0.0109743	0.245607												CC	GO:0030027	lamellipodium	6	198	0.0216891	0.26377	ENSBGRG00000000973(FGD6),ENSBGRG00000002693(APBB2),ENSBGRG00000003960(ENAH),ENSBGRG00000006051(CDC42BPA),ENSBGRG00000008613(ENSBGRG00000008613),ENSBGRG00000009644(PPP1R9A)
BP	GO:0014002	astrocyte development	6	22	ENSBGRG00000005861(LDLR),ENSBGRG00000009568(LAMC3),ENSBGRG00000016632(LAMB2),ENSBGRG00000020463(NR1D1),ENSBGRG00000022541(MT3),ENSBGRG00000022644(PLP1)	0.0109793	0.245607												BP	GO:0000041	transition metal ion transport	5	142	0.0217011	0.265233	ENSBGRG00000007817(ATP6V1C1),ENSBGRG00000009072(SLC30A7),ENSBGRG00000014876(ATP7B),ENSBGRG00000020672(ABCG2),ENSBGRG00000024679(PICALM)
BP	GO:0090263	positive regulation of canonical Wnt signaling pathway	13	72	ENSBGRG00000001078(WNT10B),ENSBGRG00000002134(CAV1),ENSBGRG00000003307(TBL1XR1),ENSBGRG00000005464(USP47),ENSBGRG00000005672(SRC),ENSBGRG00000005984(CSNK1D),ENSBGRG00000006342(RSPO1),ENSBGRG00000007368(FAM53B),ENSBGRG00000010536(FGF2),ENSBGRG00000014984(PRDM15),ENSBGRG00000017585(WNK1),ENSBGRG00000023662(DAAM2),ENSBGRG00000025654(TNKS)	0.0110165	0.245687												CC	GO:0014801	longitudinal sarcoplasmic reticulum	1	2	0.0217302	0.26377	ENSBGRG00000010412(ATP2A2)
MF	GO:0008035	high-density lipoprotein particle binding	3	6	ENSBGRG00000003668(APOA1),ENSBGRG00000012214(SCARB1),ENSBGRG00000019666(PLTP)	0.0110336	0.258077												CC	GO:0031379	RNA-directed RNA polymerase complex	1	2	0.0217302	0.26377	ENSBGRG00000005235(TENT2)
MF	GO:0043121	neurotrophin binding	3	6	ENSBGRG00000000909(FSTL4),ENSBGRG00000004372(NTRK2),ENSBGRG00000023500(NGFR)	0.0110336	0.258077												CC	GO:0031431	Dbf4-dependent protein kinase complex	1	2	0.0217302	0.26377	ENSBGRG00000025235(DBF4)
BP	GO:0016049	cell growth	35	262	ENSBGRG00000000074(N6AMT1),ENSBGRG00000000405(MFSD2A),ENSBGRG00000000520(DPYSL2),ENSBGRG00000000764(CDKN1B),ENSBGRG00000000909(FSTL4),ENSBGRG00000001111(C9orf72),ENSBGRG00000001761(IFRD1),ENSBGRG00000001892(ING5),ENSBGRG00000002228(IGFBP5),ENSBGRG00000004107(SMARCA2),ENSBGRG00000004203(SEMA7A),ENSBGRG00000005442(CYFIP1),ENSBGRG00000005464(USP47),ENSBGRG00000006057(RND2),ENSBGRG00000006587(EXOSC9)…	0.0111553	0.247063												CC	GO:0036501	UFD1-NPL4 complex	1	2	0.0217302	0.26377	ENSBGRG00000025394(NPLOC4)
BP	GO:0045595	regulation of cell differentiation	124	1136	ENSBGRG00000000061(GABPA),ENSBGRG00000000197(EPHA3),ENSBGRG00000000213(NFE2L2),ENSBGRG00000000405(MFSD2A),ENSBGRG00000000520(DPYSL2),ENSBGRG00000000764(CDKN1B),ENSBGRG00000000909(FSTL4),ENSBGRG00000001078(WNT10B),ENSBGRG00000001761(IFRD1),ENSBGRG00000001789(STAT1),ENSBGRG00000002070(GLIS1),ENSBGRG00000002134(CAV1),ENSBGRG00000002228(IGFBP5),ENSBGRG00000002486(XRCC5),ENSBGRG00000002538(SMAD5),ENSB…	0.011156	0.247063												CC	GO:0045170	spectrosome	1	2	0.0217302	0.26377	ENSBGRG00000015284(SPTBN1)
MF	GO:0019199	transmembrane receptor protein kinase activity	11	58	ENSBGRG00000000197(EPHA3),ENSBGRG00000001978(TGFBR3),ENSBGRG00000004372(NTRK2),ENSBGRG00000004989(ACVR2A),ENSBGRG00000005369(FLT3),ENSBGRG00000006109(FLT4),ENSBGRG00000012192(NTRK3),ENSBGRG00000013918(EPHA5),ENSBGRG00000017354(BMPR2),ENSBGRG00000017575(FGFR3),ENSBGRG00000020676(CSF1R)	0.0111591	0.258077												CC	GO:0070381	endosome to plasma membrane transport vesicle	1	2	0.0217302	0.26377	ENSBGRG00000024679(PICALM)
BP	GO:0071453	cellular response to oxygen levels	14	80	ENSBGRG00000000213(NFE2L2),ENSBGRG00000000283(HP1BP3),ENSBGRG00000001479(ATP6V1A),ENSBGRG00000001621(AQP3),ENSBGRG00000002134(CAV1),ENSBGRG00000003951(AQP1),ENSBGRG00000005204(AJUBA),ENSBGRG00000007850(TERT),ENSBGRG00000012269(TIGAR),ENSBGRG00000015313(ADAM8),ENSBGRG00000017283(FAS),ENSBGRG00000018786(PTGS2),ENSBGRG00000019464(SUV39H1),ENSBGRG00000022541(MT3)	0.0111932	0.247063												CC	GO:0090534	calcium ion-transporting ATPase complex	1	2	0.0217302	0.26377	ENSBGRG00000010412(ATP2A2)
BP	GO:0007155	cell adhesion	93	823	ENSBGRG00000000197(EPHA3),ENSBGRG00000000461(NR4A3),ENSBGRG00000000812(SNED1),ENSBGRG00000001078(WNT10B),ENSBGRG00000002134(CAV1),ENSBGRG00000002536(EPB41L4B),ENSBGRG00000002544(EMCN),ENSBGRG00000002633(PPP3CA),ENSBGRG00000002717,ENSBGRG00000003000(RASA1),ENSBGRG00000003668(APOA1),ENSBGRG00000004717(ITGA5),ENSBGRG00000005094(NEGR1),ENSBGRG00000005204(AJUBA),ENSBGRG00000005255(COL5A1),ENSBGRG00000…	0.0112132	0.247063												BP	GO:0003205	cardiac chamber development	6	194	0.0219601	0.265233	ENSBGRG00000006060(IGF1R),ENSBGRG00000007922(MYH6),ENSBGRG00000008351(MYH7),ENSBGRG00000020312(CPLANE1),ENSBGRG00000024536(BMP5),ENSBGRG00000024593(TGFBR2)
BP	GO:1901564	organonitrogen compound metabolic process	454	4650	ENSBGRG00000000074(N6AMT1),ENSBGRG00000000197(EPHA3),ENSBGRG00000000203(DDOST),ENSBGRG00000000213(NFE2L2),ENSBGRG00000000221(F3),ENSBGRG00000000405(MFSD2A),ENSBGRG00000000428(ATR),ENSBGRG00000000440(PYM1),ENSBGRG00000000593(PRKAA2),ENSBGRG00000000673(ADCY6),ENSBGRG00000000711(METAP2),ENSBGRG00000000726(PPIE),ENSBGRG00000000764(CDKN1B),ENSBGRG00000000770(ECE1),ENSBGRG00000000918(STK36),ENSBGRG0000…	0.0114119	0.249386												BP	GO:0002514	B cell tolerance induction	1	2	0.0222385	0.265233	ENSBGRG00000024593(TGFBR2)
MF	GO:0008134	transcription factor binding	49	402	ENSBGRG00000000213(NFE2L2),ENSBGRG00000000542(CRTC1),ENSBGRG00000000867(IKZF4),ENSBGRG00000000918(STK36),ENSBGRG00000001789(STAT1),ENSBGRG00000001845(KAT2B),ENSBGRG00000003739(ETS2),ENSBGRG00000003766(HOXC13),ENSBGRG00000003782(COMMD7),ENSBGRG00000004281(HDAC5),ENSBGRG00000005119(TTC8),ENSBGRG00000005223(PARP1),ENSBGRG00000005831(KLF5),ENSBGRG00000006023(FHL2),ENSBGRG00000006370(BBS5),ENSBGRG0000…	0.0116137	0.264393												BP	GO:0002543	activation of blood coagulation via clotting cascade	1	2	0.0222385	0.265233	ENSBGRG00000021443(ANO6)
BP	GO:0035933	glucocorticoid secretion	3	6	ENSBGRG00000015409(CRY1),ENSBGRG00000023482(GALR1),ENSBGRG00000025055(SELENOM)	0.0117278	0.249386												BP	GO:0002649	regulation of tolerance induction to self antigen	1	2	0.0222385	0.265233	ENSBGRG00000024593(TGFBR2)
BP	GO:0044854	plasma membrane raft assembly	3	6	ENSBGRG00000002134(CAV1),ENSBGRG00000013434(PACSIN2),ENSBGRG00000026642(EMP2)	0.0117278	0.249386												BP	GO:0002661	regulation of B cell tolerance induction	1	2	0.0222385	0.265233	ENSBGRG00000024593(TGFBR2)
BP	GO:0046532	regulation of photoreceptor cell differentiation	3	6	ENSBGRG00000010658(DLX1),ENSBGRG00000010765(DLX2),ENSBGRG00000011349(CNTF)	0.0117278	0.249386												BP	GO:0002663	positive regulation of B cell tolerance induction	1	2	0.0222385	0.265233	ENSBGRG00000024593(TGFBR2)
BP	GO:0046533	negative regulation of photoreceptor cell differentiation	3	6	ENSBGRG00000010658(DLX1),ENSBGRG00000010765(DLX2),ENSBGRG00000011349(CNTF)	0.0117278	0.249386												BP	GO:0006436	tryptophanyl-tRNA aminoacylation	1	2	0.0222385	0.265233	ENSBGRG00000012212(WARS2)
BP	GO:0046666	retinal cell programmed cell death	3	6	ENSBGRG00000007038(FASLG),ENSBGRG00000010536(FGF2),ENSBGRG00000011349(CNTF)	0.0117278	0.249386												BP	GO:0007287	Nebenkern assembly	1	2	0.0222385	0.265233	ENSBGRG00000018952(TRAK1)
BP	GO:0060693	regulation of branching involved in salivary gland morphogenesis	3	6	ENSBGRG00000007052(NTN4),ENSBGRG00000013093(FGF7),ENSBGRG00000020976(BTBD7)	0.0117278	0.249386												BP	GO:0008315	G2/MI transition of meiotic cell cycle	1	2	0.0222385	0.265233	ENSBGRG00000000262(BOLL)
BP	GO:0061074	regulation of neural retina development	3	6	ENSBGRG00000010067(GDF11),ENSBGRG00000010658(DLX1),ENSBGRG00000010765(DLX2)	0.0117278	0.249386												BP	GO:0008583	mystery cell differentiation	1	2	0.0222385	0.265233	ENSBGRG00000018694(USP9X)
BP	GO:0150172	regulation of phosphatidylcholine metabolic process	3	6	ENSBGRG00000000405(MFSD2A),ENSBGRG00000005861(LDLR),ENSBGRG00000012214(SCARB1)	0.0117278	0.249386												BP	GO:0016598	protein arginylation	1	2	0.0222385	0.265233	ENSBGRG00000023442(ATE1)
BP	GO:1902866	regulation of retina development in camera-type eye	3	6	ENSBGRG00000010067(GDF11),ENSBGRG00000010658(DLX1),ENSBGRG00000010765(DLX2)	0.0117278	0.249386												BP	GO:0019389	glucuronoside metabolic process	1	2	0.0222385	0.265233	ENSBGRG00000020672(ABCG2)
BP	GO:1902869	regulation of amacrine cell differentiation	3	6	ENSBGRG00000010067(GDF11),ENSBGRG00000010658(DLX1),ENSBGRG00000010765(DLX2)	0.0117278	0.249386												BP	GO:0021691	cerebellar Purkinje cell layer maturation	1	2	0.0222385	0.265233	ENSBGRG00000012463(RERE)
BP	GO:1904683	regulation of metalloendopeptidase activity	3	6	ENSBGRG00000010257(STAT3),ENSBGRG00000024679(PICALM),ENSBGRG00000025250(RHBDF2)	0.0117278	0.249386												BP	GO:0021699	cerebellar cortex maturation	1	2	0.0222385	0.265233	ENSBGRG00000012463(RERE)
BP	GO:0015849	organic acid transport	26	182	ENSBGRG00000000405(MFSD2A),ENSBGRG00000002454(LRRC8D),ENSBGRG00000004372(NTRK2),ENSBGRG00000005071,ENSBGRG00000005175,ENSBGRG00000005554(SLC43A1),ENSBGRG00000006751(SLC7A1),ENSBGRG00000007419(SLC25A32),ENSBGRG00000007536(SLC6A19),ENSBGRG00000008855(CLN8),ENSBGRG00000010102(P2RX7),ENSBGRG00000010236,ENSBGRG00000010376(SLC15A4),ENSBGRG00000011584(ACE2),ENSBGRG00000013000(NOS2),ENSBGRG00000016741(SL…	0.0118475	0.249968												BP	GO:0032470	positive regulation of endoplasmic reticulum calcium ion concentration	1	2	0.0222385	0.265233	ENSBGRG00000010412(ATP2A2)
BP	GO:0060491	regulation of cell projection assembly	20	130	ENSBGRG00000001923(GAP43),ENSBGRG00000002134(CAV1),ENSBGRG00000003534(ACTR3),ENSBGRG00000005442(CYFIP1),ENSBGRG00000005672(SRC),ENSBGRG00000005831(KLF5),ENSBGRG00000007471(RHOQ),ENSBGRG00000007480(KCTD17),ENSBGRG00000009795(CEP120),ENSBGRG00000010102(P2RX7),ENSBGRG00000011323(CDC42EP4),ENSBGRG00000012804(BIN3),ENSBGRG00000013787(MNS1),ENSBGRG00000015158(DPYSL3),ENSBGRG00000017874(FSCN1),ENSBGRG00…	0.0118577	0.249968												BP	GO:0034775	glutathione transmembrane transport	1	2	0.0222385	0.265233	ENSBGRG00000023586(ABCC1)
BP	GO:0098656	anion transmembrane transport	20	130	ENSBGRG00000000798(GABRG2),ENSBGRG00000001004(VDAC1),ENSBGRG00000002454(LRRC8D),ENSBGRG00000005554(SLC43A1),ENSBGRG00000006083(SLC26A4),ENSBGRG00000006751(SLC7A1),ENSBGRG00000007178(SLC12A7),ENSBGRG00000007419(SLC25A32),ENSBGRG00000008855(CLN8),ENSBGRG00000009042(RIPK1),ENSBGRG00000010376(SLC15A4),ENSBGRG00000011584(ACE2),ENSBGRG00000016741(SLC1A6),ENSBGRG00000017235(SLC38A5),ENSBGRG00000017713(S…	0.0118577	0.249968												BP	GO:0035044	sperm aster formation	1	2	0.0222385	0.265233	ENSBGRG00000005235(TENT2)
BP	GO:0042475	odontogenesis of dentin-containing tooth	12	65	ENSBGRG00000002594(GLI2),ENSBGRG00000004899(DLX3),ENSBGRG00000004989(ACVR2A),ENSBGRG00000006002(JAG2),ENSBGRG00000010388(MSX1),ENSBGRG00000010658(DLX1),ENSBGRG00000010765(DLX2),ENSBGRG00000013920(NECTIN1),ENSBGRG00000017213(WDR72),ENSBGRG00000023500(NGFR),ENSBGRG00000025440(SERPINE1),ENSBGRG00000025453(RUNX2)	0.0120199	0.251625												BP	GO:0035192	nuclear cortical migration	1	2	0.0222385	0.265233	ENSBGRG00000018694(USP9X)
BP	GO:1901654	response to ketone	12	65	ENSBGRG00000000593(PRKAA2),ENSBGRG00000000673(ADCY6),ENSBGRG00000001978(TGFBR3),ENSBGRG00000002134(CAV1),ENSBGRG00000003951(AQP1),ENSBGRG00000004063(ABHD2),ENSBGRG00000008823(P2RY4),ENSBGRG00000010012(AR),ENSBGRG00000014792(ACACA),ENSBGRG00000020407(SPP1),ENSBGRG00000020550(SLC12A3),ENSBGRG00000023716(SIN3A)	0.0120199	0.251625												BP	GO:0035443	tripeptide transmembrane transport	1	2	0.0222385	0.265233	ENSBGRG00000023586(ABCC1)
BP	GO:0032535	regulation of cellular component size	32	236	ENSBGRG00000000283(HP1BP3),ENSBGRG00000000520(DPYSL2),ENSBGRG00000000909(FSTL4),ENSBGRG00000001761(IFRD1),ENSBGRG00000001929(EPS8),ENSBGRG00000003000(RASA1),ENSBGRG00000003534(ACTR3),ENSBGRG00000003951(AQP1),ENSBGRG00000004203(SEMA7A),ENSBGRG00000004554(VAV2),ENSBGRG00000005442(CYFIP1),ENSBGRG00000006057(RND2),ENSBGRG00000007178(SLC12A7),ENSBGRG00000008697(KEL),ENSBGRG00000008855(CLN8),ENSBGRG000…	0.0120395	0.251625												BP	GO:0035574	histone H4-K20 demethylation	1	2	0.0222385	0.265233	ENSBGRG00000026049(PHF8)
BP	GO:0006278	RNA-dependent DNA biosynthetic process	10	50	ENSBGRG00000002486(XRCC5),ENSBGRG00000005672(SRC),ENSBGRG00000007192(TERF2),ENSBGRG00000007850(TERT),ENSBGRG00000011128(EXOSC10),ENSBGRG00000014113(ATM),ENSBGRG00000017777(DKC1),ENSBGRG00000019234(NAT10),ENSBGRG00000025654(TNKS),ENSBGRG00000026089(PARN)	0.012152	0.253254												BP	GO:0035600	tRNA methylthiolation	1	2	0.0222385	0.265233	ENSBGRG00000025903(CDKAL1)
BP	GO:0010950	positive regulation of endopeptidase activity	16	97	ENSBGRG00000000221(F3),ENSBGRG00000003405(NOD1),ENSBGRG00000005913(DAPK1),ENSBGRG00000007038(FASLG),ENSBGRG00000009029(EGLN3),ENSBGRG00000009451(HIP1),ENSBGRG00000010161(MTCH1),ENSBGRG00000010257(STAT3),ENSBGRG00000016600(PDCD5),ENSBGRG00000017283(FAS),ENSBGRG00000019027(ATP2A3),ENSBGRG00000019776(CLEC7A),ENSBGRG00000022099(LAPTM5),ENSBGRG00000022744(PYCARD),ENSBGRG00000023500(NGFR),ENSBGRG000000…	0.0122462	0.254492												BP	GO:0042062	long-term strengthening of neuromuscular junction	1	2	0.0222385	0.265233	ENSBGRG00000015284(SPTBN1)
BP	GO:0040011	locomotion	128	1181	ENSBGRG00000000461(NR4A3),ENSBGRG00000000520(DPYSL2),ENSBGRG00000000770(ECE1),ENSBGRG00000001516(CCDC25),ENSBGRG00000001905(TBCCD1),ENSBGRG00000001914(TNS1),ENSBGRG00000001923(GAP43),ENSBGRG00000001929(EPS8),ENSBGRG00000002134(CAV1),ENSBGRG00000002228(IGFBP5),ENSBGRG00000002490(CELF3),ENSBGRG00000002536(EPB41L4B),ENSBGRG00000002594(GLI2),ENSBGRG00000002633(PPP3CA),ENSBGRG00000003251(GLIPR2),ENSBG…	0.0124334	0.255377												BP	GO:0042245	RNA repair	1	2	0.0222385	0.265233	ENSBGRG00000024270(FTO)
BP	GO:0009792	embryo development ending in birth or egg hatching	59	491	ENSBGRG00000000061(GABPA),ENSBGRG00000000682(CECR2),ENSBGRG00000000770(ECE1),ENSBGRG00000001167(PRKACB),ENSBGRG00000002039(HOXA6),ENSBGRG00000002249(DZIP1L),ENSBGRG00000002594(GLI2),ENSBGRG00000003786(MYF6),ENSBGRG00000004042(OSR2),ENSBGRG00000004989(ACVR2A),ENSBGRG00000006002(JAG2),ENSBGRG00000006338(PCDH8),ENSBGRG00000007192(TERF2),ENSBGRG00000007688(FZD6),ENSBGRG00000007751(HECTD1),ENSBGRG0000…	0.0124571	0.255377												BP	GO:0044028	DNA hypomethylation	1	2	0.0222385	0.265233	ENSBGRG00000005231(NIBAN2)
BP	GO:0001503	ossification	34	255	ENSBGRG00000001078(WNT10B),ENSBGRG00000002070(GLIS1),ENSBGRG00000002228(IGFBP5),ENSBGRG00000002538(SMAD5),ENSBGRG00000002594(GLI2),ENSBGRG00000002633(PPP3CA),ENSBGRG00000003767(TENT5A),ENSBGRG00000004042(OSR2),ENSBGRG00000004379(NOTUM),ENSBGRG00000004989(ACVR2A),ENSBGRG00000005559(ATP6V1B1),ENSBGRG00000005785(SLC24A3),ENSBGRG00000006023(FHL2),ENSBGRG00000006423(MYOC),ENSBGRG00000007997(SMOC1),ENS…	0.0125803	0.255377												BP	GO:0044029	hypomethylation of CpG island	1	2	0.0222385	0.265233	ENSBGRG00000005231(NIBAN2)
BP	GO:0032370	positive regulation of lipid transport	9	43	ENSBGRG00000000351(EEPD1),ENSBGRG00000002134(CAV1),ENSBGRG00000003668(APOA1),ENSBGRG00000007038(FASLG),ENSBGRG00000010102(P2RX7),ENSBGRG00000019666(PLTP),ENSBGRG00000019832(C1QTNF1),ENSBGRG00000020407(SPP1),ENSBGRG00000023482(GALR1)	0.0126631	0.255377												BP	GO:0045660	positive regulation of neutrophil differentiation	1	2	0.0222385	0.265233	ENSBGRG00000021550(IKZF1)
BP	GO:0034394	protein localization to cell surface	9	43	ENSBGRG00000006153(FCN1),ENSBGRG00000013090(LEPROT),ENSBGRG00000013093(FGF7),ENSBGRG00000020650(TMEM35A),ENSBGRG00000020777(ACTN2),ENSBGRG00000023274(MESD),ENSBGRG00000024118(JAM3),ENSBGRG00000024679(PICALM),ENSBGRG00000026642(EMP2)	0.0126631	0.255377												BP	GO:0051389	inactivation of MAPKK activity	1	2	0.0222385	0.265233	ENSBGRG00000006060(IGF1R)
[truncated: 9,183 more rows]

## Sheet: LP vs HP
GO analysis for differential expression miRNAs between LP vs HP									KEGG pathway analysis for differential expression miRNAs between LP vs HP										GO analysis for differential expression circRNAs between LP vs HP									KEGG pathway analysis for differential expression circRNAs between LP vs HP
[truncated: 9,806 more rows]

[truncated: 1 more sheets: MP vs HP]
