# Supplementary material for: Whole transcriptomic analysis revealed the effects of different dietary protein levels on the growth and development of Jersey-yak
Source: Research Square preprint supplement (doi:10.21203/rs.3.rs-7466956/v1), 2025-09-30
Supplement: Supplementary file 6 [file b7509d2c49d739cda6c9a143.xlsx]

## Sheet: Sheet1
Symbol	Primer pairs sequences (5 ′ -3 ′ )		Accessing number	Annealing temperature ( °C )
PGK1	F	GCTGAGCCAACCAAAATA	XM_005888671.2	58
	R	CATCAAACAAAGAAGTGCC
MYOG	F	AGGAAGTCGGTGTCTGTG	XM_005895606.1	58
	R	GCTCTATGTACTGGATGGC
IGFBP5	F	AACTGTGACCGCAAAGGGTT	XM_005889636.2	58
	R	AAAGTCCCCGTCCACGTACT
ENO1	F	AACTGGAATCTATGAGGCCC	XM_005892697.2	58
	R	GGCAGGCGCAATAGTTTTAT
MSTRG.2715.8	F	CCCAGGAACTGCTAACGA	/	58
	R	ATGGCTGCTCACGACACTC
MSTRG.54295.6	F	GGGACACTTTAGGTTGCT	/	58
	R	CTTTGTTGTGGGGACTGA
bgrcirc_005011	F	CCCTCTTGACTCACCTTGA	/	58
	R	CTGTAGGTGTAGGGATAGTGGTA
bgrcirc_017953	F	TTGTTGAGGGTCTGCGT	/	58
	R	AAGTGCCCTGGTCCTTGTT
The primer information used in this study
