# Supplementary material for: Whole transcriptomic analysis revealed the effects of different dietary protein levels on the growth and development of Jersey-yak
Source: Research Square preprint supplement (doi:10.21203/rs.3.rs-7466956/v1), 2025-09-30
Supplement: Supplementary file 7 [file c6ec13516c51a9778d16b7a8.xlsx]

## Sheet: Sheet1
Composition and nutrient level of supplementary diet
Raw material name	The content of treatment/%
	MP	HP
Corn	50.4	53
Barley	15.5	11.6
Palm kernel cake	10.5	10
Molasses	3	0.7
Bean meal	8	7.7
Cottonseed meal	8	11.6
Expanded urea	0.4	1.2
Feed grade magnesium oxide	0.2	0.2
Calcium hydrogen phosphate	1.5	1.5
Sodium bicarbonate	0.6	0.6
Feed grade sodium chloride	1	1
Fine ground limestone	0.8	0.8
Ruminant premix feed	0.1	0.1
Nutrient levels
Crude protein (CP)	15.16	17.9
Crude fat (EE)	3.69	3.99
Net energy for weight gain（MJ/kg）	4.37	4.41
Metabolizable energy（MJ/kg）	10.12	10.19
Ca	0.85	0.84
P	0.66	0.66
Note: (1) Premix is provided for each kilogram of diet: vitamin A15000 IU, vitamin D3 20000 IU, vitamin E 3000 IU, iron 3200 mg, manganese 1500 mg, zinc 2000 mg, copper 650 mg, iodine 35 mg, selenium 10 mg, cobalt 10 mg, calcium 130 g and phosphorus 30 g. (2) Nutrition levels are all calculated values.
