# Supplementary material for: Whole transcriptomic analysis revealed the effects of different dietary protein levels on the growth and development of Jersey-yak
Source: Research Square preprint supplement (doi:10.21203/rs.3.rs-7466956/v1), 2025-09-30
Supplement: Supplementary file 8 [file f584c974cacbc9d8161701f9.xlsx]

## Sheet: Sheet1
Table S2. Summary of Sequencing Reads and Mapping to the Reference Gonome
Samples	Tatal Reads	Clean Reads	Total Mapped	Multiple Mapped Reads	Uniq Mapped Reads	Q20	Q30
LP1	75989762	69087624	65037437 (94.14%)	5394338 (8.29%)	59643099 (91.71%)	0.9767	0.9408
LP2	73188762	64975068	61238115 (94.25%)	5858314 (9.57%)	55379801 (90.43%)	0.9772	0.9418
LP3	74272870	66545742	62863992 (94.47%)	5697722 (9.06%)	57166270 (90.94%)	0.9774	0.9412
MP1	73028864	66024756	62358992 (94.45%)	6553977 (10.51%)	55805015 (89.49%)	0.9761	0.9396
MP2	67803932	60894832	57445095 (94.33%)	5334397 (9.29%)	52110698 (90.71%)	0.9759	0.9382
MP3	75178538	67974512	63973493 (94.11%)	7204344 (11.26%)	56769149 (88.74%)	0.9752	0.9386
HP1	73724594	65419936	61709050 (94.33%)	5910383 (9.58%)	55798667 (90.42%)	0.975	0.9386
HP2	75201898	65390262	61241500 (93.66%)	6558327 (10.71%)	54683173 (89.29%)	0.9746	0.9369
HP3	79260342	71752572	67136040 (93.57%)	8732151 (13.01%)	58403889 (86.99%)	0.975	0.938
Total Mapped: the total number of sequences compared to the reference genome； Q20 (%) : the percentage of bases with a base recognition accuracy of more than 99 % ; Q30 (%) : the percentage of bases with a base recognition accuracy of more than 99.9 %.
